# Supplementary material
Source: ML conference proceedings conference paper supplement (https://openreview.net/forum?id=JL42j1BL5h)
Supplement: supplementary_material [file attachment]

## Sheet: Sheet1
Input	Output
Я часто чувствую себя одиноким и беспомощным, меня никто не может понять, я даже чувствую себя неудачником, без всякой ценности и смысла, эти чувства вгоняет меня в сильную депрессию и безысходность, я не знаю, как от них избавиться.	Мне очень жаль слышать, что вы чувствуете себя таким образом. Одиночество и беспомощность могут вызывать сильные эмоции и чувства безысходности, но важно помнить, что есть способы справиться с этими чувствами. Вот несколько рекомендаций, которые могут помочь вам: 1. Обратитесь за помощью. Поговорите с доверенными людьми о своих чувствах и эмоциях. Это может быть друг, родственник или профессионал…
Даже если я просто куплю пачку чипсов, я беспокоюсь, что люди подумают, что я ем слишком много, что я махнул на себя рукой.	Не стоит переживать о том, что другие люди могут думать о том, что вы едите. Каждый имеет право на свои предпочтения и выбор в пище. Если вам хочется купить пачку чипсов для себя, не стоит беспокоиться о мнении окружающих. Важно слушать свое тело и следить за своим здоровьем, но оставайтесь увереными в своем выборе пищи, не обращая внимания на суждения других людей.
Я всегда чувствую усталость и бессилие, не могу сосредоточиться на выполнении своих задач или даже заниматься тем, что меня интересует, что вызывает у меня сильное разочарование.	Понимаю, как это может быть неприятно. Усталость и бессилие могут быть результатом различных факторов, как физических, так и психологических. Однако, есть несколько вещей, которые вы можете попробовать, чтобы улучшить свою энергию и сосредоточенность: 1. Обратите внимание на свой режим сна. Проверьте, достаточно ли вы высыпаетесь по ночам. Рекомендуется спать от 7 до 9 часов ежедневно. Создайте к…
В последнее время я всегда плохо сплю по ночам, или мне снятся кошмары, когда я засыпаю. Когда я просыпаюсь, я чувствую себя очень усталым и измученным.	Проблемы со сном и ночные кошмары могут быть очень неприятными и нарушать ваш обычный режим жизни. Вот несколько советов, которые могут помочь вам улучшить качество сна и справиться с ночными кошмарами: 1. Создайте регулярный распорядок сна: Постарайтесь ложиться и вставать в одно и то же время каждый день, даже в выходные. Это поможет вашему организму настроиться на правильный сон и бодрствовани…
Каждый раз, когда я обращаюсь к врачу, улучшения нет, а настроение ухудшается, и я часто впадаю в жалость к себе и самобичевание.	Я сожалею слышать, что у вас возникли такие трудности. Это важно разобраться в причинах вашего негативного состояния и неполадок в обращении к врачу. Вот несколько предложений для поддержки в
Я всегда чувствую себя изолированным и отверженным, даже в толпе я чувствую себя одиноким.	Мне очень жаль слышать, что вы чувствуете себя изолированным и одиноким. Эти чувства могут быть трудными, но есть несколько вещей, которые можно попробовать, чтобы справиться с ними: 1. Разговор с близкими людьми: Поговорите с доверенными друзьями или членами семьи о своих чувствах. Они могут оказать поддержку и дать совет. 2. Присоединение к группе с общими интересами: Попробуйте найти группу ил…
Увлечение играми или Интернетом - это своего рода нервное напряжение.	Увлечение играми или Интернетом иногда может носить характер компульсивного поведения, что в некоторых случаях может вызывать нервное напряжение. Если заметите, что это начинает влиять на вашу психологическую или физическую благополучность, может быть полезно попробовать некоторые стратегии для управления этим увлечением. Например, установление определенного расписания для игр или Интернета, поощ…
В последнее время я нахожусь под слишком большим давлением. Я чувствую себя очень встревоженным каждый день, я плохо сплю, у меня болит голова, мое сердце бьется быстрее, как будто я могу упасть в обморок в любой момент.	Понимаю, что сильное давление может быть очень трудно переносить. Важно заботиться о своем физическом и эмоциональном благополучии. Вот несколько советов, которые могут помочь вам справиться с этим: 1. Перед тем как принять любое решение, возьмите время
Каждый раз, когда я сталкиваюсь с трудностями и неудачами, я всегда теряю уверенность и мотивацию и чувствую, что не могу с этим справиться	Бывает, что сталкиваться с трудностями и неудачами может быть действительно тяжело и влиять на наше самочувствие. Однако, важно помнить, что каждый из нас иногда испытывает подобные чувства. Вот несколько советов, которые могут помочь вам справиться с этим: 1. Примите свои эмоции: Допустите себе почувствовать разочарование и неуверенность. Позвольте себе пережить эти эмоции, и не стесняйтесь обра…
Я всегда беспокоюсь, что то, что я делаю, недостаточно хорошо, и я чувствую, что меня постоянно осуждают другие люди, и это угнетает.	Мне жаль слышать, что вы чувствуете себя так. Беспокойство относительно своих действий и чувство осуждения со стороны других людей могут быть очень неприятными. Вот несколько советов, которые могут помочь вам справиться с этими чувствами: 1. Помните, что каждый человек имеет свои собственные представления о том, что является "хорошим". Никто не может оценить вас абсолютно правильно, поэтому не ст…
Я всегда беспокоился о том, все ли я делаю правильно, и боялся, что другие л	Беспокойство и неуверенность в себе могут быть трудными чувствами, с которыми сталкиваются многие люди. Вот несколько советов, которые могут помочь вам справиться с этими чувствами: 1. Помните, что все люди ошибаются. Никто не является идеальным, и каждый из нас делает ошибки. Позвольте себе быть человеком и принимать свои ошибки как возможность для роста и обучения. 2. Развивайте позитивное мышл…
Не делясь своими мыслями, я всегда чувствую, что вот-вот взорвусь, и не могу избежать взглядов других.	Позвольте мне помочь вам с этим. Представлять себе, что вас окружает невидимое пространство, где вы можете свободно выразить свои мысли без страха перед взглядами других. Визуализируйте это место и представьте себя в нем, где ничто и никто не может вас оценить или осудить. Отдавайте себе разрешение быть искренним и открытым только в этом приватном пространстве. Вы также можете найти какую-то физи…
В моей семье произошел внезапный несчастный случай, оба моих родителя получили серьезные травмы, из-за чего я почувствовал себя беспомощным и подавленным, и у меня даже появились симптомы депрессии.	Я очень сожалею о вашей ситуации. В таких ситуациях очень важно обратиться за помощью и поддержкой. Вы можете попросить друзей или других родственников оказать вам поддержку. Также стоит обратиться к медицинскому специалисту, чтобы получить помощь в управлении симптомами депрессии. Они могут предложить подходящую терапию, например, психотерапию или лекарства, которые могут помочь вам справиться с
Я обнаружил, что все менее и менее социально активен, всегда предпочитаю быть в одиночестве. У меня нет интереса участвовать в общественных мероприятиях или делиться своей жизнью с другими. Это одиночество заставляет меня чувствовать себя очень подавленным.	Быть менее социально активным и предпочитать одиночество иногда может быть нормальной реакцией на стресс или нашу внутреннюю реакцию на определенные обстоятельства. Однако, если это одиночество начинает влиять на ваше самочувствие и вызывать депрессивные эмоции, важно обратить внимание на это и предпринять шаги, чтобы улучшить свое состояние. Вот несколько рекомендаций: 1. Поговорите с кем-то, ко…
У меня есть сильное желание контролировать, я всегда хочу держать все в своих руках, и я не позволяю другим вмешиваться, что приводит к разрушению межличностных отношений.	Понимаю, что желание контролировать ситуации может быть сильным, но иногда он может негативно влиять на отношения с другими людьми. Хотелось бы предложить вам несколько советов: 1. Разберитесь в своих мотивах: попробуйте понять, почему у вас возникла такая потребность в контроле. Возможно, есть определенные страхи или неуверенность, которые приводят к этому. Разобравшись в своих мотивах, вы сможе…
Я часто чувствую, что мой разум очень хаотичен, как будто в моей голове одновременно слишком много мыслей и голосов, что заставляет меня чувствовать себя очень растерянным и потерянным.	Когда у вас возникают такие ощущения, может быть полезно применить несколько стратегий для улучшения психического благополучия. Вот несколько советов, которые могут помочь вам управлять своими мыслями и снизить хаотичность в вашем разуме: 1. Медитация: Регулярная практика медитации может помочь сосредоточить ваш разум и уменьшить хаос в вашей голове. Найдите тихое место, где вы можете сидеть спок…
Почему моя семья критикует меня за все, что я делаю	Возможно, причиной критики со стороны вашей семьи может быть несколько факторов: 1. Ожидания: Может быть, ваша семья имеет определенные ожидания от вас, и они не всегда совпадают с тем, что вы делаете. Это может создавать разногласия и приводить к критике. 2. Несогласия: Люди имеют разные мнения, взгляды и предпочтения. Ваша семья может относиться к тому, что вы делаете, иначе. Это также может вл…
В последнее время я всегда чувствую себя измученным, каждый день у меня нет энергии, даже после долгого сна лучше не становится.	Я понимаю, что это может быть очень изматывающе. Низкая энергия и усталость могут быть вызваны разными факторами. Вот некоторые возможные причины и советы о том, как улучшить свое состояние: 1. Правильное питание: обратите внимание на свою диету. Убедитесь, что вы получаете достаточное количество питательных веществ, включая белки, углеводы и здоровые жиры. Ешьте свежие овощи, фрукты и обогащенны…
Я чувствую, что потерял всякую мотивацию и надежду, и жизнь кажется бессмысленной.	Понимаю, что это может быть очень трудным периодом. Бессмысленность и потеря мотивации - распространенные чувства, с которыми многие люди сталкиваются. Важно помнить, что вы не одиноки в своих эмоциях, и существуют способы справиться с этим. Вот несколько предложений, которые могут помочь вам восстановить внутреннюю мотивацию и найти смысл в жизни: 1. Разделите свои цели на более мелкие и достижи…
Иногда я очень нервничаю, а иногда чувствую себя подавленным, но не знаю, как изменить свое настроение.	Это нормально, чтобы время от времени чувствовать себя нервничающим или подавленным. Однако есть несколько вещей, которые могут помочь вам изменить настроение: 1. Физическая активность: Занимайтесь регулярной физической активностью, так как она может помочь вам снять стресс и улучшить настроение. Прогулки на свежем воздухе, бег, йога или другие спортивные занятия могут быть полезны. 2. Релаксацио…
У меня проблемы с мышлением и восприятием, я часто слышу странные звуки или вижу странные вещи, от которых мне становится очень страшно	Я сожалею, что вы испытываете такие проблемы. Важно понимать, что я, как виртуальный помощник, не могу диагностировать или лечить медицинские состояния. Однако, я могу предложить несколько рекомендаций. 1. Обратитесь к врачу: Звуки и видения могут быть связаны с различными медицинскими или психологическими проблемами. Рекомендую вам найти специалиста, например, психиатра или невролога, чтобы обсу…
Я часто нервничаю и тревожусь, не в состоянии контролировать свои эмоции и стресс, что заставляет меня чувствовать себя очень неловко.	Понимаю, что постоянная нервозность и тревожность могут быть очень неприятными. Хотелось бы посоветовать вам несколько стратегий, которые могут помочь вам управлять эмоциями и снизить уровень стресса. 1. Глубокое дыхание: Когда вы чувствуете нервозность, попробуйте делать глубокие и медленные вдохи, задерживая дыхание на несколько секунд, а затем медленно выдыхайте. Это может помочь снизить урове…
Я часто чувствую себя одиноким и беспомощным, и чувствую себя опустошенным, даже когда меня кто-то окружает. Я не знаю, почему это происходит, как я могу обратиться за помощью?	Мне очень жаль слышать, что вы чувствуете себя таким образом. Одиночество и беспомощность могут быть очень тяжелыми на ощущение бремени. Даже если кто-то находится поблизости, это не всегда означает, что они понимают наши эмоциональные потребности. Однако есть несколько вещей, которые вы можете попробовать сделать: 1. Разговор с близкими: Расскажите своим друзьям или семье о своих эмоциях и чувст…
Я и раньше переживал психологическую травму, и теперь я всегда вспоминаю этот опыт и испытываю страх и боль. Мне нужно обратиться за помощью, чтобы преодолеть эти эмоции.	Я понимаю, что переживание психологической травмы может оставить глубокий след и вызывать сильные эмоции. Важно и нормально обратиться за помощью, чтобы эффективно справиться с этими эмоциями. Я рекомендую вам обратиться к лицензированному психотерапевту или психологу, который сможет поддержать вас и предоставить необходимые инструменты для преодоления этой травмы. Психотерапия может включать в с…
Я не могу избавиться от воспоминаний о прошлом, и всякий раз, когда я думаю об определенных вещах, мне становится очень больно, и это даже влияет на мою повседневную жизнь.	Понимаю, что постоянные воспоминания о прошлом могут быть тяжелым бременем и влиять на вашу повседневную жизнь. Вот несколько советов, чтобы помочь вам справиться с этой ситуацией: 1. Лучше понять и принять: Попробуйте осознать, что прошлое невозможно изменить, и принять его таким, какое оно было. Это может помочь вам перестать беспокоиться о ситуациях, на которые вы не можете повлиять. 2. Прости…
Раньше надо мной издевались, а теперь, когда я думаю об этом, мне становится страшно и даже снятся кошмары.	Я сожалею, что вы переживаете такие неприятные эмоции из-за прошлых событий. Издевательства могут оставить глубокий след на ментальном и эмоциональном благополучии людей. Возможно, вам будет полезно обратиться за помощью к профессиональному терапевту или психологу, чтобы разобраться со своими эмоциями и помочь вам справиться с плохими сновидениями. Они могут предложить вам эффективные стратегии д…
Я чувствую себя все более одиноко, нет друзей, нет родных, даже если кто-то рядом, мне очень пусто и некомфортно.	Мне очень жаль слышать, что вы чувствуете себя одиноко. Ощущение отсутствия связей с другими людьми может быть трудным и стрессовым. Вот несколько идей, которые могут помочь вам в этой ситуации: 1. Попробуйте найти новые хобби или интересы, которые вам нравятся. Присоединяйтесь к сообществам или клубам, где вы можете встретить людей с общими интересами. 2. Используйте социальные сети для поиска л…
Я всегда чувствую, что не могу сосредоточиться, мне трудно выполнять задания, я часто уставший и подавленный.	Понимаю, что это может быть очень трудно. Мне кажется, что вам может помочь принятие нескольких мер для улучшения концентрации и общего самочувствия. Вот несколько рекомендаций: 1. Организуйте свой рабочий процесс. Разделите задачи на более мелкие подзадачи и установите для себя ясные сроки выполнения каждой из них. Регулярно отмечайте прогресс и отмечайте достижения. 2. Попробуйте практиковать м…
Я часто чувствую себя одиноким и потерянным, не в состоянии установить близкие отношения с другими людьми и даже теряю интерес и энтузиазм к окружающим меня людям и вещам.	Я понимаю, что чувство одиночества и потерянности может быть очень тяжелым. Важно помнить, что многие люди испытывают подобные чувства время от времени. Вот несколько советов, которые могут помочь вам преодолеть это состояние: 1. Обратитесь за поддержкой: Поговорите с друзьями, членами семьи или доверенным человеком о своих чувствах. Они могут предложить вам поддержку и понимание, что поможет вам…
Я чувствую себя одиноким и потерянным, и я чувствую, что не могу построить близкие отношения с другими, что заставляет меня чувствовать себя очень подавленным и беспомощным.	Я сожалею, что вы чувствуете себя таким образом. Это может быть очень сложным и тяжелым периодом в жизни. Важно помнить, что многие люди испытывают подобные чувства временно или периодически. Вот несколько факторов, которые могут помочь вам улучшить свою ситуацию: 1. Обратитесь к профессионалу: Психотерапия или консультация врача могут помочь вам разобраться в своих эмоциях и научиться строить бо…
Все вокруг счастливы, а я чувствую себя опустошенным внутри, не в силах насладиться никакой радостью.	Мне очень жаль слышать, что вы чувствуете себя опустошенным. Значительные различия в эмоциональном состоянии между вами и окружающими могут быть трудными и вызывать чувство отчуждения. Вот несколько предложений, которые могут помочь вам найти путь к собственному счастью: 1. Примите свои эмоции: Важно осознать, что все эмоции, включая те, которые вы чувствуете сейчас, абсолютно нормальны. Разрешит…
У меня была низкая самооценка, и я часто чувствовал себя бесполезным и незначительным, из-за чего я боялся преследовать свои мечты и цели, боялся неудачи и того, что другие будут смотреть на меня свысока.	Низкая самооценка может быть очень трудной, но важно помнить, что она может быть изменена и подниматься. Вот несколько советов, которые могут помочь вам повысить свою самооценку: 1. Признайте свои достижения: Возьмите небольшую записную книжку и пишите в ней каждый день хотя бы одно свое достижение, даже если это кажется малозначительным. Это поможет вам осознать и признать свои успехи. 2. Заботь…
Я нахожу, что стал слишком чувствителен к некоторым вещам, и част	о становлюсь ранимым. Что мне делать? Если вы стали слишком чувствительным и ранимым, есть несколько вещей, которые можно попробовать сделать: 1. Определите причину вашей повышенной чувствительности. Разберитесь, что именно вызывает у вас такую эмоциональную реакцию. Это может быть связано с прошлыми травмами, стрессом, низким самооценкой, или другими факторами. 2. Разделите свои эмоции от ситуац…
Мои родители всегда возлагали на меня большие надежды и хотели, чтобы я был хорошим человеком, но я чувствую, что не соответствую их стандартам. Я очень тревожен, и у меня низкая самооценка.	Я понимаю, что это может быть очень трудно, когда родители имеют высокие ожидания, но чувствуете, что не соответствуете им. Без сомнения, вы стараетесь быть лучшей версией самого себя, и это замечательно. Важно помнить, что каждый человек уникален, и не всегда возможно соответствовать всем ожиданиям. Здорово, что вы осознаете свои эмоции и хотите что-то изменить. Низкая самооценка и ощущение трев…
Я каждый день вижу сны, постоянно повторяющиеся, как будто я заблудился в лабиринте без выхода.	Это звучит как неприятный опыт. Сны, которые постоянно повторяются, могут быть намеком на то, что в вашей жизни есть какие-то проблемы или неудовлетворенные потребности. Лабиринт без выхода может символизировать ощущение беспомощности или затруднение в принятии решений. Какими чувствами вы ощущаете, когда видите эти сны? Попытайтесь записать их и разобраться, что они могут значить для вас. Если э…
Всякий раз, когда я остаюсь один, я думаю обо всем, что произошло раньше, и все это причиняет мне боль.	Я понимаю, что такие моменты могут быть трудными и вызывать негативные эмоции. В таких случаях, может быть полезно обратиться к методам самоуспокоения и рефлексии. Позвольте мне поделиться некоторыми советами: 1. Практикуйте медитацию: научитесь сосредотачиваться на дыхании, осознавать свои мысли и эмоции без суждений. Это поможет вам освободиться от болезненных воспоминаний. 2. Уделите время сам…
Когда я вижу свое тело, я чувствую себя таким уродливым, таким ужасным.	Я очень сожалею, что вы чувствуете себя таким образом. Однако, важно понимать, что восприятие собственного тела может различаться у разных людей и зависит от многих факторов, включая стандарты красоты, социальное окружение и личные взгляды. Важно помнить, что все тела уникальны и красивы по-своему. Если эти чувства ухудшают ваше самочувствие или уровень уверенности, может быть полезно обратиться …
У меня аутизм, я не знаю, как общаться с другими, я чувствую себя изолированным в совершенно другом мире, и мне очень больно, я беспомощен.	Я понимаю, что это может быть очень трудно для вас. Хочу заверить вас, что вы не одиноки и что есть поддержка и ресурсы, которые могут помочь вам общаться с другими. Вот несколько советов, которые могут быть полезными: 1. Ищите поддержку: Обратитесь к специалистам в области аутизма, таким как психологи, терапевты или группы поддержки. Они могут помочь вам научиться навыкам общения и дать вам инст…
Меня когда-то предал друг, мне было так больно, я начал сомневаться в надежности человечества и дружбы, и даже стал замыкаться в себе и отталкивать других	Бывает очень сложно преодолеть предательство и вернуть доверие к людям. Но важно помнить, что все люди разные, и одиночные негативные опыты не должны определять взгляд на всю общность. Не стоит изолироваться от других, так как дружба и поддержка важны для нашего эмоционального благополучия. Вот несколько шагов, которые могут помочь вам вернуться к доверию и восстановить связи с другими людьми: 1.…
В современном обществе люди часто разочаровываются или даже совершают самоубийство, потому что не могут завершить свою работу.	Разочарование и стремление полностью завершить работу – распространенные проблемы, с которыми сталкиваются многие люди. Вот несколько советов, которые могут помочь вам справиться с этими чувствами и найти баланс: 1. Устанавливайте реалистичные ожидания: Некоторые люди пытаются взять на себя слишком много работы, что приводит к перегрузке и разочарованию. Важно установить реалистичные цели и объем…
Я всегда думал о своем прошлом и будущем, беспокоился и расстраивался из-за этого, не зная, что с этим делать.	Многие из нас могут иногда быть затянутыми в раздумья о прошлом и будущем. Однако, постоянное беспокойство и расстройство из-за этого могут негативно сказываться на нашей жизни. Вот несколько советов, которые могут помочь вам справиться с этим: 1. Практика осознанности (миндфулнесс): Сосредоточьтесь на моменте здесь и сейчас, сосредоточьтесь на своих текущих действиях и ощущениях. Медитация и дых…
Я всегда чувствую себя неловко, когда нахожусь перед большой группой людей.	Неловкость перед большой группой людей - распространенное чувство. Вот несколько советов, которые могут помочь вам преодолеть неловкость: 1. Постепенно выходите из зоны комфорта: начните с маленьких групп, затем переходите к большим. Это поможет вам постепенно приспособиться. 2. Подготовьтесь заранее: если вы знаете, что вам предстоит выступление или презентация, позаботьтесь о подготовке материа…
Я недоволен своей внешностью и всегда чувствую, что я уродлив. Это делает меня очень неуверенным в общении и знакомстве с друзьями. Как я могу изменить это душевное состояние?	Понимаю, что недовольство своей внешностью может сильно влиять на самооценку и уверенность в себе. Вот несколько советов, которые помогут вам изменить это душевное состояние: 1. Признайте свою уникальность: Каждый из нас уникален и имеет свои особенности, которые делают нас прекрасными. Попытайтесь признать и принять свою уникальность и развивать позитивное отношение к себе. 2. Фокусируйтесь на п…
Я полон страха и беспокойства о будущем, и я не знаю, как справиться с проблемами и давлением в будущего.	Беспокойство и страх по поводу будущего вполне естественны, особенно когда сталкиваешься с проблемами и давлением. Однако, есть несколько вещей, которые могут помочь справиться с этими эмоциями: 1. Возьмите глубокий вдох и позвольте себе принять свои эмоции. Попытка подавить или игнорировать их может только усугубить ситуацию. 2. Разделите свои проблемы на более мелкие и управляемые части. Работа…
Я обнаруживаю, что часто попадаю в неудержимый круговорот размышлений, размышляя об одной и той же проблеме или ситуации снова и снова, не в силах выпутаться, что приводит к снижению качества сна и влияет на мою повседневную жизнь.	Упасть в повторные размышления и крутиться вокруг одной и той же проблемы может быть очень изнурительно и негативно сказываться на вашей жизни и самочувствии. Вот несколько стратегий, которые могут помочь вам преодолеть этот круговорот: 1. Заведите дневник. Постарайтесь выразить и проанализировать свои мысли и эмоции, связанные с проблемой, в письменной форме. Это может помочь сосредоточиться и о…
Я пережил несколько травмирующих переживаний, и эти переживания беспокоили меня. Я чувствую, что мне трудно прорабатывать эти эмоции и воспоминания, что привело к постепенному ухудшению моего психического здоровья.	Я сожалею, что вы прошли через такие травматические события, и понимаю, насколько это может быть трудным для вашего психического здоровья. Важно обратиться за помощью для проработки этих эмоций и воспоминаний. Один из способов, чтобы начать прорабатывать эти травмы, - обратиться к профессиональному психологу или психотерапевту. Они могут помочь вам обсудить и понять свои эмоции, предоставить подд…
Я часто чувствую себя подавленным, теряю радость и мотивацию к жизни, у меня нет уверенности в будущем. Эта эмоция заставляет меня чувствовать себя очень болезненным и беспомощным.	Мне очень жаль слышать, что вы испытываете такие негативные эмоции. Это может быть трудно и изнурительно. Помимо поиска профессиональной поддержки, вот несколько предложений, которые могут помочь вам справиться с этим состоянием. 1. Обратитесь к специалисту. Профессиональная помощь врача или психотерапевта может быть очень полезной. Они могут помочь вам разобраться в ваших эмоциях и предложить ст…
В последнее время их дети часто выходят из себя и даже портят предметы в доме, что может быть признаком депрессии.	Частое выходить из себя и порча предметов в доме могут быть признаком не только депрессии, но и других проблем, например, стресса, неконтролируемой злости или проблем с поведением. Однако, если вы обеспокоены поведением своих детей, я рекомендую обратиться к профессиональному психологу или психиатру для получения более точной оценки и возможной диагностики. Они смогут провести соответствующие тес…
Я часто испытываю стресс и беспокойство, даже мелочи могут вызывать у меня беспокойство и напряжение, мне трудно расслабиться и наслаждаться жизнью.	Стресс и беспокойство могут оказывать негативное влияние на наше физическое и эмоциональное здоровье. Важно найти способы справляться с этими чувствами и находить баланс в жизни. Вот несколько советов: 1. Установите приоритеты: Определите, какие задачи действительно важны, и сосредоточьтесь на них. Не пытайтесь сделать слишком много за раз, это может привести к чувству перегрузки. 2. Регулярно ра…
Я очень недоволен своим телом, я всегда чувствую себя слишком толстым или слишком худым, и я не знаю, как принять свое тело.	Понимание и принятие собственного тела может быть сложным процессом, но существует несколько способов, которые могут помочь вам начать это делать: 1. Практикуйте самолюбовь: Начните с осознания и уважения к своему телу. Постарайтесь откреститься от сравнений с другими людьми и сфокусироваться на том, что вам нравится в своем теле. Например, уделите внимание вашим сильным сторонам и качествам, а т…
Мне не хватает уверенности в своих силах и способностях, я всегда чувствую, что у меня ничего не получается, и я боюсь потерпеть неудачу и быть осмеянным другими.	Бесконечная самокритика и страх перед неудачей могут быть очень трудными эмоциями. Однако, есть несколько стратегий, которые могут помочь вам построить большую уверенность в себе: 1. Изучите свои достижения: Проанализируйте свои предыдущие успехи, даже незначительные. Запишите их на бумаге и воспоминайте о них в те моменты, когда ощущаете сомнения. 2. Установите реалистичные цели: Разбейте больши…
Мое настроение резко колеблется, от очень высокого до очень подавленного, без какой-либо закономерности.	Понимаю, что резкие колебания настроения могут быть трудными и непредсказуемыми. Хотелось бы помочь вам найти способы улучшить и стабилизировать ваше настроение. Вот несколько рекомендаций: 1. Здоровый образ жизни: Оптимизируйте свои основные потребности, такие как сон, питание и физическая активность. Регулярный сон, правильное питание и физические упражнения могут помочь улучшить ваше настроени…
Когда я нахожусь в толпе, я всегда чувствую, что меня все игнорируют, и даже чувствую, что я не существую, что заставляет меня чувствовать себя очень одиноким и потерянным.	Понимаю, что такие чувства могут быть довольно неприятными. Ощущение незаметности в толпе может быть вызвано различными факторами, включая самооценку, социальную тревожность или определенные обстоятельства. Вот несколько советов, которые могут помочь вам справиться с этой ситуацией: 1. Определите свои ожидания: Иногда мы ожидаем, что окружающие должны обращать на нас внимание, но в реальности люд…
Я часто чувствую, что я недостаточно хорош, чтобы заслужить одобрение и уважение других.	Я понимаю, что это чувство недостаточности может быть трудным. Однако, важно понимать, что каждый человек уникален и имеет свои качества и достоинства. Никто не должен чувствовать себя недостойным любви и уважения. Развивайте самолюбие и осознавайте свои положительные стороны. Также старайтесь окружаться поддерживающими и позитивными людьми, чтобы создать здоровую и благоприятную атмосферу вокруг…
Я чувствую себя сбитым с толку и беспомощным перед будущим, и я не знаю, в каком направлении двигаться, что заставляет меня чувствовать себя очень тревожно и неуютно.	Понимаю, что это может быть очень трудным периодом. Важно помнить, что многие люди испытывают похожие чувства и нерешенность перед будущим. Вот несколько советов, которые могут помочь вам найти свое направление: 1. Определите свои цели: Сделайте паузу и сфокусируйтесь на том, что вы хотите достичь в жизни. Это может быть как личная, так и профессиональная цель. Напишите свои цели и начните думать…
Я всегда беспокоюсь, что мои действия и решения будут подвергнуты критике и отрицанию со стороны других, что заставляет меня чувствовать себя очень расстроенным.	Понимаю, что критика и отрицание со стороны других могут быть неприятными и вызывать чувство расстройства. Важно помнить, что каждый человек имеет свое собственное мнение и опыт, и невозможно угодить всем. Вот несколько советов, которые могут помочь вам справиться с этим: 1. Самоприятие: Постарайтесь принять себя таким, какой вы есть, и понять, что ваши решения и действия имеют право на существов…
Я хочу покончить с собой, но я не осмеливаюсь, я просто хочу спрятаться и никогда больше не выходить.	Я очень сожалею, что вы испытываете такие сильные эмоции. Однако, я не могу оказывать надлежащую помощь в таких ситуациях. Важно обратиться к профессионалам, которые специализируются на поддержке психического здоровья, например, позвонить в службу экстренной психологической помощи вашей страны, такой как горячая линия для кризисных ситуаций или врачу-психиатру.
Моя семья часто критикует меня, из-за чего мне очень больно. Я не знаю, как с ними общаться. Они стали для меня очень далекими.	Бывает, что критика со стороны близких людей может быть очень обидной и оставлять негативный след. Важно понимать, что критика не всегда является намеренно обидной и может быть выражением заботы о вас или желания видеть вас в лучшей форме. Вот несколько советов, которые могут помочь вам общаться с вашей семьей: 1. Открыто обсуждайте свои чувства: Попробуйте поговорить с вашей семьей, выразив свои…
Раньше я расстраивался из-за мелочей, с трудом оправлялся от эмоциональных спадов и чувствовал себя бесполезным.	Бывает, что мы можем быть подвержены эмоциональным колебаниям и чувству бесполезности. Рад, что вы обратили внимание на такие эмоции и стремитесь справиться с ними. Вот несколько советов, которые могут помочь вам: 1. Практикуйте самосозерцание: сделайте шаг назад и проанализируйте свои эмоции. Попытайтесь выяснить, почему вы чувствуете себя расстроенным или бесполезным. Письменные записи или разг…
Меня травили сверстники, что привело к хронической низкой самооценке и страху быть отвергнутым.	Я сожалею слышать, что у вас был такой негативный опыт. Вам следует помнить, что то, что другие люди говорят или делают, не определяет вашу личность или вашу ценность. Это могут быть проблемы или неуверенность внутри них, которые они проецируют на вас. Важно научиться строить здоровую самооценку и верить в себя. Вот несколько советов, которые могут вам помочь: 1. Признайте свои чувства: важно доп…
В последнее время я всегда чувствую, что мое настроение сильно колеблется. Иногда я счастлив, но иногда я в депрессии без причины. Это заставляет меня чувствовать себя очень обеспокоенным. Я не знаю, страдаю ли я депрессией.	Понимаю, как это может быть озабочивающим для вас. Важно обратить внимание на колебания настроения и понять, есть ли у вас клиническая депрессия. Но помните, что я не являюсь специалистом в области психологии или психиатрии, и лучше обратиться за помощью к профессионалу. Однако, есть несколько практических советов, которые могут помочь вам улучшить ваше настроение: 1. Поддерживайте регулярный сон…
Мой стресс очень высок, я чувствую, что больше не могу этого выносить, и я часто чувствую себя взволнованным или испытываю трудности с дыханием.	Понимаю, что стресс может быть очень трудным. Важно позаботиться о своем физическом и эмоциональном благополучии. Вот несколько советов, которые помогут вам справиться со стрессом: 1. Постарайтесь выделять время на релаксацию и отдых. Включите в свою рутину медитацию, глубокое дыхание, йогу или другие способы расслабления. 2. Позаботьтесь о достаточном количестве сна. Установите регулярный график…
Я часто испытываю чувство тревоги и страха, не зная, откуда оно исходит, и иногда становится трудно даже дышать.	Понимаю, что чувство тревоги и страха может быть очень неприятным и влиять на вашу жизнь. Важно найти способы справиться с этими эмоциями. Вот несколько стратегий, которые могут помочь вам уменьшить тревогу и страх: 1. Глубокое дыхание: Сфокусируйтесь на своем дыхании и делайте медленные и глубокие вдохи и выдохи. Это может помочь вам расслабиться и успокоиться. 2. Практика медитации или йоги: Ме…
Я всегда чувствовал себя никчемным, недостаточно хорошим, недостаточно умным, недостаточно красивым, и это расстраивает.	Я понимаю, что такие чувства могут быть трудными. Важно помнить, что каждый человек имеет свои сильные и слабые стороны, и они неповторимы. Вместо того чтобы сравнивать себя с другими, попробуйте сосредоточиться на своих достижениях, независимо от их размера. Поддерживать положительную самооценку может быть сложно, но это возможно. Развивайте свои навыки, ставьте перед собой реалистичные цели и н…
У меня всегда есть мысли о самоубийстве, я чувствую, что жизнь бессмысленна, и я ничего не стою. Я также чувствую безнадежность и чувствую, что у меня нет надежды на будущее	Я очень сожалею, что вы чувствуете себя таким образом. Ваши эмоции и мысли весьма серьезны, и важно найти поддержку в этой ситуации. Первым шагом я рекомендую вам обратиться за помощью к профессионалам. Специалисты в области психического здоровья, такие как психологи или психиатры, обучены помогать людям, испытывающим подобные чувства. Они могут предложить вам различные методы лечения, такие как …
Я часто чувствую, что моя жизнь бессмысленна, я не знаю, почему я так живу, я чувствую, что у меня нет цели, нет мотивации, я теряю время зря, я чувствую себя никчемным.	Многим людям в какой-то момент жизни бывает сложно найти смысл и цель. Важно помнить, что это общее чувство и необязательно означает, что ваша жизнь действительно бессмысленна. Вот несколько советов, которые могут помочь вам справиться с этим: 1. Разберитесь в своих ценностях: Попытайтесь определить, что вам действительно важно в жизни и что приносит вам удовлетворение. Когда вы знаете свои ценно…
Я чувствую себя очень напряженным в последнее время, потому что у меня много работы, мне нужно решать много задач каждый день, но у меня есть чувство невыполненного долга, что меня очень расстраивает, как я могу справиться с этим психологическим давлением?	Чувство напряжения и невыполненного долга может быть очень тяжелым, но есть несколько стратегий, которые могут помочь вам справиться с этим психологическим давлением: 1. Организация и планирование: Создайте план работы на каждый день или неделю, разбивая задачи на более маленькие и установив приоритеты. Это поможет вам иметь четкое представление о том, что нужно сделать и исполнять обязательства …
Я часто испытываю беспокойство и нервозность и чувствую, что не могу справиться с различными нагрузками и вызовами в своей жизни.	Беспокойство и нервозность могут быть очень трудными и влиять на ваше общее состояние и уверенность. Вот несколько предложений, которые могут помочь вам справиться с этими чувствами: 1. Регулярно занимайтесь физической активностью, такой как прогулки, бег или йога. Физическая активность поможет вам снять напряжение и улучшить настроение. 2. Практикуйте глубокое дыхание и релаксацию. Вы можете исп…
Мое сердце полно негативных эмоций и неуверенности в себе, я не знаю, как избавиться от этого состояния.	Я понимаю, что это может быть очень трудно. Избавиться от негативных эмоций и неуверенности в себе требует времени и усилий, но есть несколько практических шагов, которые могут помочь: 1. Выражайте свои эмоции: Разговаривайте с доверенным человеком о своих чувствах и беспокойстве. Иногда просто поделиться своими эмоциями может облегчить душу. 2. Поставьте границы: Установите границы и научитесь г…
Я чувствую, что мои эмоции становятся все более и более нестабильными. Иногда я чувствую депрессию, а иногда я испытываю эмоции. Я не знаю, есть ли что-то неправильное с моим сознанием..	Могу понять, почему вы чувствуете себя таким образом. Но я также хотел бы напомнить вам, что эмоции и состояния ума могут варьироваться у каждого человека в течение времени. Более нестабильные эмоции могут быть результатом различных факторов, включая стресс, усталость или события вокруг вас. Однако, если вы продолжаете чувствовать себя депрессивным или обеспокоенным повторно или длительное время,…
Когда ребенок приезжает домой на каникулы, семья холодна и никогда не принимает его доброту. Он чувствует, будто совершил ошибки, и в его сердце пусто. Он беспокоится, о том, станет ли он таким же, как его родители, когда вырастет.	Это очень сложная и эмоциональная ситуация, и понимаю, что это может вызывать тревогу и сомнения у ребенка. Важно помнить, что каждый человек уникален, и то, что происходит в семье, не обязательно определит, каким вы станете в будущем. Есть много факторов, влияющих на формирование нашей личности, и мы имеем возможность выбирать свой собственный путь и быть взрослыми, которыми мы хотим стать. Если…
Он не может уснуть почти каждую ночь, снова и снова, его настроение становится все хуже и хуже, и он беспокоится о том, не возникнет ли у него депрессии или других более серьезных психологических проблем.	Если ваш друг испытывает проблемы со сном и настроением, а также беспокоится о возможных психологических проблемах, рекомендуется обратиться к специалисту, такому как психолог или врач-психиатр. Они могут провести диагностику и рассмотреть возможные причины и лечение данной ситуации. Важно помнить, что профессиональная помощь может быть крайне полезной для разрешения этих проблем.
В последнее время я всегда чувствую, что я уязвим, и мои мысли подобны веревке, которую я не способен схватить.	Понимаю, что это может быть неприятным ощущением. Если вы постоянно чувствуете уязвимость и у вас сложности с контролем своих мыслей, важно обратиться за помощью. Вот несколько советов, которые могут вам помочь: 1. Поделитесь с кем-то близким. Разговор со знакомым или близким человеком о ваших мыслях и эмоциях может помочь вам получить поддержку и понимание. 2. Обратитесь к профессионалисту. Псих…
Каждый раз, когда я думаю о своей неудаче, я чувствую себя беспомощным. Думая, что я не принят обществом, я теряю мужество. Думая, что, возможно, не смогу осуществить свою мечту, я чувствую себя беспомощным и без лекарств.	Понимаю, что такие думы могут быть очень тяжелыми и оказывать негативное влияние на самочувствие. Важно помнить, что каждый из нас сталкивается с неудачами и сомнениями время от времени. Однако, это не означает, что мы не можем преодолеть трудности и достичь своих целей. Вот несколько способов, которые могут помочь вам овладеть ощущением беспомощности: 1. Переоцените свои мысли: Попытайтесь замен…
Мои отношения всегда были нестабильными, я часто испытываю эмоциональные переживания, не знаю, как справиться с проблемами в отношениях, это заставляет меня чувствовать себя бессильным и потерянным.	Я понимаю, что это может быть очень трудным и изнурительным. Вот несколько советов, которые могут помочь вам справиться с проблемами в отношениях: 1. Будьте открытыми для общения: Поговорите со своим партнером о своих эмоциях, опасениях и о том, какие проблемы вы испытываете в отношениях. Это может помочь разрешить конфликты и снизить эмоциональное напряжение. 2. Работайте над собой: Иногда пробл…
Иногда я теряю контроль над собой, становлюсь очень раздражительным и несдержанным и даже выхожу из себя по отношению к окружающим меня людям.	Понимаю, что это может быть сложной ситуацией. Важно найти способы управлять своими эмоциями и справляться с раздражением. Вот некоторые стратегии, которые могут помочь: 1. Определите причину: Попробуйте понять, что вызывает ваше раздражение и несдержанность. Это может быть связано со стрессом, недосыпанием или другими факторами. Постарайтесь узнать, какие ситуации или поведения вызывают у вас та…
Моя работа связана со стрессом, и каждый день мне приходится сталкиваться с различными проблемами и испытаниями, что вызывает у меня сильное беспокойство. У меня начинается бессонница, пропадает аппетит, и иногда я чувствую, что не в состоянии контролировать свои эмоции.	Борьба со стрессом в работе может быть сложной, но есть несколько способов, которые могут помочь вам справиться с этим состоянием и улучшить ваше физическое и эмоциональное благополучие. 1. Постарайтесь найти способы расслабления и уменьшения стресса в своей повседневной жизни. Это может быть что-то, что вам приносит удовольствие, например, занятие спортом, медитация, йога или просто время, прове…
Я всегда не в силах сдержать свои эмоции, иногда я внезапно злюсь, а иногда внезапно замолкаю, из-за чего не могу предсказать свое поведение и поступки, чувствую себя очень взволнованным и растерянным.	Понимаю, что это может быть неприятно и вызывать беспокойство. Вот несколько советов, которые могут помочь в сдерживании эмоций: 1. Осознавайте свои эмоции: Попытайтесь понять, что вызывает у вас такие сильные эмоции. Узнавая свои собственные чувства, вы сможете лучше контролировать свои реакции на них. 2. Дышите глубоко: В моменты, когда вы чувствуете, что ваши эмоции начинают уходить из-под кон…
Я не могу избавиться от путаницы неприятных переживаний в прошлом. Всякий раз, когда я вспоминаю об этих вещах, я чувствую мучительную боль и утрату.	Понимаю, что такие переживания могут быть тяжелыми и возникают у многих людей. Вот несколько стратегий, которые могут помочь вам избавиться от путаницы и справиться с неприятными переживаниями: 1. Обратитесь за помощью к психологу или терапевту. Профессионалы смогут помочь вам разобраться в своих эмоциях и освободиться от прошлых травм и путаницы. 2. Попробуйте практиковать медитацию или глубокое…
Я часто чувствую себя одиноким и беспомощным, мне не с кем поговорить о моем внутреннем мире, я чувствую себя покинутым миром, это заставляет меня чувствовать себя очень болезненно и безнадежно.	Я сожалею, что вы чувствуете себя таким образом. Ощущение одиночества и беспомощности может быть очень трудным. Важно помнить, что вы не одиноки в своих чувствах - многие люди сталкиваются с подобными эмоциями. Есть несколько вещей, которые вы можете попробовать сделать, чтобы почувствовать себя лучше. 1. Обратитесь к близким людям: Попытайтесь поговорить с кем-то в вашей жизни о том, что вы чувс…
Я часто чувствую себя неполноценным и беспомощным из-за своих недостатков, чувствую, что я недостаточно хорош, недостоин любви.	Мне жаль слышать, что вы чувствуете себя таким образом. Важно помнить, что каждый человек имеет свои недостатки и испытывает моменты самокритики. Однако, никакие недостатки не делают вас менее достойным любви или уважения. Попробуйте изменить свое отношение к себе и обратить внимание на свои положительные качества и достижения. Заводите записную книжку, в которой будете писать о том, что вам удал…
У меня много работы и учебы, и я часто чувствую себя истощенным, но я не знаю, как расслабиться и снять стресс.	Понимаю, что баланс между работой, учебой и отдыхом может быть сложным. Вот несколько советов, которые помогут вам расслабиться и снять стресс: 1. Установите границы: Попробуйте распределить свое время между работой, учебой и отдыхом. Создайте расписание, где вы явно указываете время для отдыха. Помните, что вы также заслуживаете время и внимание. 2. Физическая активность: Отправляйтесь на прогул…
Мое настроение меняется слишком быстро, требуется всего немного времени, чтобы перейти от радостного к грустному, почему так?	Быстрая смена настроения может иметь несколько причин. Одна из них может быть связана с вашим эмоциональным состоянием или событиями, происходящими в вашей жизни. Некоторые люди воспринимают и реагируют на эмоции более интенсивно, поэтому их настроение может меняться быстрее. Кроме того, химический баланс в организме, включая уровень гормонов, также может влиять на настроение и его изменения. Нек…
Я теряю терпение легче, чем другие, и чувствую себя бессмысленно подавленным и доведенным до предела из-за какой-то мелочи.	Могу понять, что это может быть очень трудно. Чувствовать себя бессмысленно подавленным и терять терпение из-за мелочей может быть признаком усталости, стресса или эмоционального истощения. Важно учиться принимать и контролировать свои эмоции, чтобы не доводить себя до предела. Возможно, вам помогло бы попробовать несколько стратегий для управления стрессом: 1. Глубокое дыхание и расслабление: По…
Каждый раз, когда я думаю о том, чтобы обратиться к врачу или проконсультироваться с психиатром, я чувствую страх и беспокойство. Я беспокоюсь, что мои проблемы будут раскрыты и осуждены другими. Этот страх мешает мне обратиться за помощью.	Я понимаю, что это может быть очень сложным и пугающим ощущением. Однако, важно помнить, что врачи и психиатры обязаны соблюдать принципы конфиденциальности и не раскрывать информацию о своих пациентах без их согласия, за исключением определенных юридических ограничений. Это означает, что ваша конфиденциальность будет защищена. Если вы все еще беспокитесь, вы также можете искать врача или психиат…
Я сталкивался со многими неудачами и несправедливостью на рабочем месте, что заставляет меня чувствовать себя безнадежным и очень разочарованным в своей жизни.	Мне очень жаль слышать, что вы испытываете такие чувства. Рабочее место может быть местом, где возникают различные проблемы и несправедливости, но есть способы справиться с этими трудностями. Вот несколько рекомендаций, которые могут помочь вам в этой ситуации: 1. Обратитесь к своему руководству или HR-отделу. Если у вас есть конкретные проблемы или несправедливость на рабочем месте, подумайте о …
Мои одноклассники подвергали меня дискриминации, и иногда я чувствую, что жить нет смысла.	Я очень сожалею, что вы испытываете такие неприятности. Дискриминация может быть очень тяжелым испытанием, но помните, что вы не одиноки. Вот несколько советов, которые могут помочь вам справиться с этой ситуацией: 1. Говорите с кем-то: Расскажите своим родителям, учителю или доверенному взрослому о том, что происходит. Они могут предложить вам поддержку и найти пути решения данного вопроса. 2. Н…
Я очень недовольна своим телом и внешним видом, всегда чрезмерно критикую и отрицаю себя, что сказывается даже на моей повседневной жизни и общественной деятельности.	Понимаю, что чувство недовольства своим телом и внешним видом может быть тяжелым и влиять на самооценку и уверенность в себе. Важно помнить, что каждый человек уникален и имеет свои прекрасные качества, независимо от внешности. Вот несколько советов, которые могут помочь вам положительно настроиться к своему телу и внешности: 1. Принимайте себя и свое тело такими, какие они есть. Выделите время д…
В последнее время я часто чувствую усталость и слабость, и я так устаю, даже поднимаясь по лестнице. Стоит ли мне обратиться к врачу?	Да, вам стоит обратиться к врачу, чтобы выяснить причины вашей усталости и слабости. Эти симптомы могут быть связаны с различными медицинскими состояниями, такими как анемия, гормональные проблемы или другие заболевания. Только врач сможет провести необходимые обследования и диагностику, чтобы определить точную причину и рекомендовать соответствующее лечение.
Я чувствую, что не могу контролировать свои эмоции и поведение и часто принимаю импульсивные решения, это психическое заболевание? Как это лечить?	Симптомы, которые вы описываете, могут быть связаны с психическим заболеванием, таким как импульсивное расстройство личности или биполярное расстройство. Однако, я не являюсь профессиональным врачом или психологом, поэтому рекомендую вам проконсультироваться с медицинским специалистом для получения точной диагноза и рекомендаций по лечению. В зависимости от вашего диагноза, вам могут быть предлож…
Подавляю все негативные эмоции в своем сердце и не позволяю себе быть немного хрупкой, но я ничего не могу с этим поделать.	Понимаю, что когда мы сталкиваемся с негативными эмоциями, может быть сложно их контролировать. Однако, есть несколько способов, которые могут помочь вам в борьбе с этим. 1. Разрешите себе чувствовать: Пусть эмоции протекают через вас и не сопротивляйтесь им. Их подавляние или игнорирование может ухудшить ваши эмоциональное состояние. Разрешите себе выразить то, что чувствуете, и примите эти эмоц…
Мы все время ссорились, каждый раз произносили какие-то болезненные слова, а потом расстались.	Понимаю, что это может быть сложно и обидно. Когда наши отношения становятся нестабильными и напряженными, важно найти способы разрешить конфликты и поддерживать здоровую коммуникацию. Вот несколько советов, которые могут помочь вам в этом: 1. Выслушивайте друг друга: Постарайтесь внимательно слушать другого человека без прерывания и судебных замечаний. Это даст возможность для более глубокого по…
Гуляя по улице, Сяо Чжан все время чувствовал, что окружающие подглядывают за ним, и его психическое состояние становилось все более и более неустойчивым.	Когда Сяо Чжан был в последний раз в таком состоянии? Может быть, у него были подобные ощущения раньше? Что может быть причиной его паранойи? Важно обратиться за помощью к специалисту, чтобы понять, что происходит и как ему можно помочь. Многие психические состояния могут быть эффективно лечены с помощью терапии или лекарственных препаратов.
Я чувствую, что есть проблема с моими межличностными отношениями. Мне трудно общаться с друзьями, семьей и коллегами. Иногда даже возникают конфликты и ссоры. Это заставляет меня чувствовать себя очень подавленным и беспомощным. Я не знаю, как построить здоровые межличностные отношения.	Понимание, что у вас есть проблема в межличностных отношениях, является первым шагом к улучшению ситуации. Вот несколько рекомендаций, которые могут помочь вам построить здоровые межличностные отношения: 1. Разберитесь в себе: Попытайтесь разобраться в своих эмоциях, мыслях и поведении. Понимание собственных эмоций и стрессовых ситуаций поможет вам лучше контролировать свои реакции и взаимодейств…
Я была недовольна тем, как я выгляжу и своим телом, и постоянно осуждала себя и сомневалась в себе, из-за чего у меня была низкая уверенность в себе и низкая самооценка.	Понимание того, что вы не были довольны своим внешним видом и телом, является первым шагом к положительным изменениям. Важно помнить, что каждый человек уникален и красив по-своему и уверенность в себе не должна зависеть от внешнего вида. Хочу поделиться несколькими советами, которые помогут вам повысить свою уверенность в себе и самооценку: 1. Практикуйте позитивное мышление: Замечайте свои поло…
Я часто чувствую себя одинокой и беспомощной, как будто меня никто по-настоящему не понимает, и мне трудно общаться с людьми, что меня беспокоит и мешает найти решение.	Я понимаю, что это может быть трудным и неприятным чувством. Однако, важно помнить, что многие люди время от времени испытывают похожие эмоции. Вот несколько советов, которые могут помочь вам справиться с ощущением одиночества и беспомощности: 1. Разговаривайте с кем-нибудь: Попробуйте найти человека, с которым вам комфортно разговаривать. Это может быть друг, член семьи, психолог или даже группа…
После того, как мои родители развелись, я жила в доме своей бабушки. Хотя я живу со своей матерью, я всегда чувствую, что она более чужая, чем моя бабушка, и я не знаю, как с ней общаться.	Бывает сложно общаться с родителями после развода, особенно если вас больше привлекает взаимодействие с другим родственником, как в вашем случае с бабушкой. Вот несколько советов, которые могут помочь вам улучшить общение с матерью: 1. Найдите общие интересы: Узнайте о том, что интересует вашу маму, и старайтесь обсуждать эти темы с ней. Это может быть что-то, связанное с работой, хобби или даже …
Я чаще терпел неудачи, чем преуспевал. Все чаще и чаще я утешаю себя тем, что пока я усердно работаю, меня будут вознаграждать, но реальность часто разочаровывает.	Понимание того, что неудачи являются неизбежной частью жизни, может помочь вам справиться с разочарованиями. Вместо того, чтобы утешать себя мыслью о награде за усердную работу, попробуйте сменить свою перспективу и подход к неудачам: 1. Пересмотрите свое определение успеха: Успех можно определить по-разному. Возможно, вы концентрируетесь только на конечных результатах, в то время как можно наход…
У меня сильное чувство страха, что что-то случится, и я не могу успокоиться	Понимаю, что это чувство страха может быть очень неприятным. Вот несколько советов, которые могут помочь вам успокоиться: 1. Глубокое дыхание: Сфокусируйтесь на своем дыхании. Медленно вдохните через нос, задержите дыхание на несколько секунд, а затем медленно выдохните через рот. Повторяйте это несколько раз, чтобы снизить уровень тревоги. 2. Упражнения расслабления: Попробуйте выполнять упражне…
Я чувствую, что нахожусь в состоянии растерянности, не зная, чего хочу и что мне делать, что меня очень беспокоит и иногда вызывает у меня некоторые негативные эмоции.	Я понимаю, что быть в состоянии растерянности может быть очень неприятно и вызывать негативные эмоции. Хороший способ начать понять, чего вы хотите и что вам нужно, - это задать себе несколько вопросов: 1. Что мне нравится делать? Какие увлечения и интересы у меня есть? 2. Какие аспекты моей жизни приносят мне радость и удовлетворение? 3. Какие мои ценности и убеждения я считаю важными? 4. Что я …
Иногда я чувствую себя подавленным, и мне трудно избавиться от негативных эмоций. Как мне скорректировать своё мышление?	Избавление от негативных эмоций и коррекция мышления - это процесс, который может потребовать времени, но возможен с практикой и терпением. Вот несколько стратегий, которые могут помочь вам начать изменять свое мышление и справляться с подавленностью: 1. Заметить и перенаправить негативные мысли: Обратите внимание на свои мысли и попробуйте заметить, когда они становятся отрицательными. Затем поп…
Я всегда чувствую, что я недостаточно хорош, недостаточно умен, недостаточно красив. Мне часто хочется выглядеть идеально, чтобы другие не видели моих недостатков.	Понимаю, что некоторые люди могут ощущать недостаточность или стремиться к идеальному облику. Важно помнить, что каждый человек уникален и имеет свои индивидуальные качества и достоинства. Вместо того, чтобы слишком фокусироваться на своих недостатках, попробуйте обратить внимание на свои сильные стороны и уверенность в себе. Развитие навыков, образование и стремление к саморазвитию могут помочь …
Я часто чувствую пустоту внутри себя, мне не хватает истинного чувства принадлежности и цели.	Пустота внутри себя и отсутствие истинного чувства принадлежности и цели могут быть очень тяжелыми и распространенными ощущениями. Вот несколько вещей, которые вы можете попробовать, чтобы преодолеть это: 1. Исследуйте себя: проведите время, задумавшись о том, что для вас действительно важно в жизни. Определение своих ценностей и убедившись, что ваше поведение соответствует этим ценностям, может …
Всякий раз, когда кто-то заводит со мной разговор или делает мне комплимент, я всегда чувствую, что они просто обманывают меня, потому что я не заслуживаю уважения.	Мне очень жаль, что вы чувствуете себя таким образом. Негативные самооценка и ощущения недостойности могут быть очень трудными. Хорошо, что вы высказали свои чувства. Важно помнить, что наши мысли и ощущения могут не всегда отражать действительность. Многие люди страдают от такого рода негативного восприятия себя, но часто это не соответствует истине. Реалистичный взгляд на себя поможет изменить …
Я беспокоился о том, что другие будут критиковать и отвергать меня, что будет приводить к все меньшей уверенности в себе Как мне повысить свою уверенность в себе?	Повышение уверенности в себе может быть вызовом, но есть несколько вещей, которые вы можете попробовать: 1. Разработайте реалистичную и положительную картину о себе. Определите свои сильные стороны и достижения, и придерживайтесь этой положительной самооценки. 2. Установите достижимые цели. Постепенно добивайтесь своих целей и отмечайте маленькие победы по пути. Это может помочь вам почувствовать…
Я не знаю, как справляться со своими эмоциями. Я часто взрываюсь из-за мелочей. Я чувствую, что не могу контролировать свои эмоции. Значит ли это, что у меня есть психологическая проблема?	Необходимо быть осторожным в диагностике психологических проблем на основе одного симптома, так как возможны различные причины для потери контроля над эмоциями. Однако, если вы чувствуете, что ваша неспособность контролировать эмоции причиняет вам значительное дискомфорт или затрудняет ваши отношения и функционирование в обществе, то рекомендуется обратиться к профессиональному психологу или тера…
Я полон страха и неуверенности в будущем, я не знаю, куда мне идти, я чувствую себя очень потерянным каждый день.	Понимаю, что это может быть очень трудно и переживаний полно. Хорошо, что вы взялись за решение этой ситуации. Вот несколько шагов, которые могут помочь вам найти направление и вернуть чувство уверенности: 1. Определитесь с целями: Поставьте перед собой конкретные и достижимые цели. Они должны быть реалистичными и основываться на вашей страсти и интересах. Разбейте долгосрочные цели на более мелк…
У меня всегда были симптомы обсессивно-компульсивного расстройства. Мне часто приходится неоднократно проверять, закрыты ли двери и окна, выключены ли электроприборы и т.д. , это влияет на мою повседневную жизнь и работу.Я хочу знать, как избавиться от этой неприятности.	Понимаю, что обсессивно-компульсивное расстройство (ОКР) может существенно повлиять на повседневную жизнь и работу. Важно обратиться за помощью к профессионалу, такому как психолог или психиатр, чтобы получить поддержку и конкретные рекомендации. Вот несколько стратегий, которые могут помочь вам управлять симптомами ОКР: 1. Когнитивно-поведенческая терапия (КПТ): Это один из наиболее эффективных …
Иногда мне скучно, я не знаю, что делать, и я не знаю, что готовит мне будущее, и я чувствую себя опустошенным.	Понимаю, как ты себя чувствуешь. Бывает, что мы ощущаем пустоту и неуверенность в будущем. Вот несколько идей, которые могут помочь тебе справиться с этим: 1. Развивай свои увлечения: Попробуй открыть для себя новые хобби или упражнения, которые вдохновляют и интересуют тебя. Погружение во что-то новое может помочь заполнить пустоту и создать чувство наполненности. 2. Определи свои цели: Постарай…
Я всегда хотела иметь ребенка, но когда я была беременна, я всегда чувствовала, что мне не суждено быть хорошей матерью.	Понимаю, что это может быть непростая ситуация. Однако само сомнение и волнение часто являются естественными чувствами для многих будущих родителей. Важно помнить, что каждый родитель уникален, и нет одного идеального способа быть хорошим родителем. Если вы всегда мечтали о ребенке, значит, у вас есть любовь и забота, которые могут помочь вам стать хорошей матерью. Важно быть открытым для обучени…
Я всегда переживала за свое тело и здоровье, опасаясь, что могу заболеть различными заболеваниями, из-за чего очень нервничала и беспокоилась.	Понимаю, что это может быть очень трудно и стрессово. Важно помнить, что забота о своем теле и здоровье - важная часть здорового образа жизни. Однако, если озабоченность начинает мешать вашей повседневной жизни, может быть полезно обратиться за помощью к специалисту, такому как врач или психолог. Чтобы снизить тревожность, можно попробовать следующие стратегии: 1. Принимайте меры по укреплению зд…
Я очень застенчива и придирчива к своей внешности и фигуре, часто попадаю в какую-то бесконечную самокоррекцию и изменение.	Понимаю, что это может быть вызывающим дискомфорт и тревогу. Важно помнить, что каждый человек уникален и красив по-своему. Вместо того, чтобы критиковать себя и стремиться быть идеальной, попробуйте принять себя такой, какая вы есть. Здоровый образ жизни, включающий правильное питание и регулярную физическую активность, может помочь вам чувствовать себя лучше. Также стоит помнить, что самокритик…
Неспособность к обучению распространена, и вы можете сделать обучение более увлекательным, рассматривая его как игру.	Абсолютно верно! Игровой подход к обучению может сделать процесс более интересным и вовлекающим. Вот несколько способов, как можно применить игровые элементы для улучшения обучения: 1. Баллы и награды: Вознаграждайте студентов за достижения и успехи. Это может быть как виртуальные баллы или значки, так и реальные призы. Например, можно создать систему баллов за выполнение заданий или достижения о…
Я явно хочу, чтобы было на кого положиться, но я не знаю, как к этому подойти.Каждый раз, когда я пытаюсь, у меня ничего не получается, а потом я теряю смелость и возвращаюсь к исходной точке.	Понимаю, что найти надежную поддержку может быть сложно, но не отчаивайтесь. Вот несколько советов, которые могут помочь вам подобрать подходящих людей для поддержки: 1. Определите свои потребности: подумайте о том, чего именно вы ожидаете от поддержки. Может быть, вам нужно кому-то, кто вас слушает или помогает советом. Ясность в том, что именно вы хотите, поможет вам найти подходящих людей. 2. …
Я замечаю, что мой интерес и энтузиазм к вещам становятся все меньше и меньше, и я всегда чувствую меньше мотивации что-либо делать. У меня есть проблема с психическим здоровьем?	Я не являюсь квалифицированным специалистом в области психического здоровья, но существуют некоторые общие признаки, которые могут указывать на возможные проблемы. У потери интереса и энтузиазма может быть множество причин, включая стресс, усталость, эмоциональное истощение или депрессию. Если этот состояние длится уже какое-то время и затрудняет вашу способность испытывать удовлетворение или вып…
Регулярный психологический стресс сильно повлияет на нашу эмоциональную стабильность и может сказаться на нашем физическом здоровье. Мы должны хорошо поработать над повышением умственных качеств и просвещением по вопросам психического здоровья.	Вы абсолютно правы! Регулярный психологический стресс может иметь серьезные последствия для нашего эмоционального и физического благополучия. Чтобы справиться с этим, важно осознать свои эмоции, научиться управлять стрессом и ознакомиться с методами поддержки психического здоровья. Есть несколько подходов, которые могут помочь повысить наши умственные качества и развить навыки, необходимые для ул…
Меня незаконно задержали на одну ночь, замучили до бессилия, я плакала одна в углу, только слезы освещали темноту.	Я сожалею, что вы пережили такой неприятный опыт. Если вы считаете, что ваше задержание было незаконным, важно обратиться к юридическим специалистам или правоохранительным органам, чтобы получить справедливость. Они могут помочь вам разобраться в произошедшем и защитить ваши права. Если вы чувствуете себя эмоционально и физически подавленными, не стесняйтесь обратиться за помощью к профессионалам…
С точки зрения психического здоровья подростков очень важно научиться строить здоровые отношения и правильно выражать свои эмоции и требования.	Да, вы абсолютно правы. Психическое здоровье подростков во многом зависит от их способности строить здоровые отношения и эффективно выражать свои эмоции и требования. Взаимодействие с другими людьми, особенно в близких отношениях, может сильно влиять на эмоциональное состояние подростка. Здоровые отношения характеризуются взаимным уважением, поддержкой, доверием и открытостью. Подросткам нужно уч…
В последнее время мне часто снятся кошмары, и эти сны вызывают у меня чувство страха и беспокойства и даже влияют на качество сна и повседневную жизнь.	Могу попробовать помочь вам справиться со снятся кошмарами. Вот несколько советов: 1. Создайте спокойную обстановку перед сном: попробуйте выполнять релаксационные упражнения, прочитайте успокаивающую книгу или слушайте музыку. Избегайте сильных стимулов, таких как фильмы или игры перед сном. 2. Подумайте о причинах снов: попробуйте понять, есть ли какие-то стрессовые ситуации или проблемы, котор…
Я всегда очень встревожен и постоянно беспокоюсь о том, как идут дела, особенно о каких-то мелочах, которые также могут заставить меня чувствовать себя неловко и некомфортно.	Постоянная тревога и беспокойство могут действительно оказывать негативное влияние на ваше физическое и эмоциональное благополучие. Вот некоторые советы, которые могут помочь вам справиться с этим: 1. Практика медитации или глубокого дыхания: Регулярная медитация или глубокое дыхание могут помочь успокоить ваш разум и снизить уровень тревоги. 2. Занятие умственно или физически активным хобби: Фок…
Я не могу остановить свои негативные мысли, иногда, даже когда все не так уж и плохо, я все равно думаю о худшем, я чувствую себя такой подавленной и беспомощной, мне кажется, что я никогда не смогу избавиться от этой эмоции.	Понимаю, что постоянное присутствие негативных мыслей может быть очень тяжелым для вас. Важно помнить, что это естественный процесс, и многие люди борются с подобными мыслями. Вот некоторые советы, которые могут помочь вам справиться с этим: 1. Разбиение отрицательных мыслей на части: Запишите все причины, по которым вы испытываете эти негативные эмоции. Затем приступите к оценке каждой причины и…
Я чувствую, что моя жизнь скучна, мне не хватает страсти и мотивации, из-за чего я чувствую себя подавленным и потерянным.	Понимаю, что это может быть сложным и утомляющим чувством. Вот несколько идей, которые могут помочь вам восстановить страсть и мотивацию в жизни: 1. Откройте новые увлечения: Попробуйте заняться чем-то новым, что вас всегда интересовало, но вы никогда не пробовали раньше. Это может быть хобби, спорт, искусство или что-то еще, что подарит вам новый виток энергии. 2. Установите цели: Определитесь с…
Я часто страдаю бессонницей, лежу ночью в постели, думая о работе, семейных делах и отношениях, из-за чего не могу сосредоточиться в течение дня, работоспособность низкая, настроение резко ухудшается.	Бессонница может быть очень мешающим фактором, оказывающим негативное влияние на вашу работоспособность и настроение. В данной ситуации, я могу предложить вам несколько советов, которые помогут вам справиться с этой проблемой: 1. Создайте режим сна: Установите себе определенное время для сна и строго придерживайтесь его. Постепенно приучайте себя засыпать и просыпаться в одно и то же время каждый…
Когда я сталкиваюсь с неудачами и разочарованиями, я думаю, что единственный способ быть в безопасности — это забыть обо всем.	Когда вы сталкиваетесь с неудачами и разочарованиями, нормально временами чувствовать себя таким образом, но забывание о всем может быть не самым эффективным способом решения проблем. Вместо этого, попробуйте следующий подход: 1. Примите свои эмоции: Разрешите себе почувствовать горечь разочарования и печаль. Признайте свои эмоции, чтобы открыть путь к их преодолению. 2. Дайте себе время для опра…
Я часто чувствую усталость и слабость. Даже если я не выполняю никакой физической работы, я чувствую себя измотанным. У меня часто бывает бессонница, и я не могу заснуть, что заставляет меня чувствовать себя очень некомфортно и тревожно.	Ваше ощущение усталости и слабости, а также бессонница могут быть связаны с различными факторами. Я могу предложить вам несколько рекомендаций, которые могут помочь вам справиться с этими проблемами: 1. Регулярное физическое упражнение: даже простые упражнения, такие как прогулки или растяжка, могут улучшить вашу энергию и сон. 2. Установите режим сна: создайте себе распорядок дня и придерживайте…
Иногда я страдаю депрессией, не могу нормально есть, а потом контролирую свое питание, потому что боюсь, что люди увидят, как я худею.	Большое спасибо за то, что поделились этим с нами. Депрессия и проблемы с питанием могут быть сложными для обращения, но помните, что вы не одни в этой ситуации. Я настоятельно рекомендую вам обратиться к профессиональному психологу или врачу для получения помощи и поддержки. Они могут помочь вам разобраться с вашими эмоциями, научить стратегиям самоуправления и предложить подходящие ресурсы. Име…
Мои родители всегда критикуют меня, и независимо от того, что я делаю, это недостаточно хорошо, это заставляет меня чувствовать себя очень подавленным и разочарованным, я чувствую, что никогда не смогу получить их одобрение и похвалу.	Я понимаю, что такие критические комментарии от родителей могут вызвать чувство подавленности и разочарования. Важно помнить, что эти комментарии часто отражают точку зрения родителей, а не обязательно вашу реальную ценность или усилия. Вот несколько советов, которые могут помочь вам справиться с этой ситуацией: 1. Выражайте свои чувства: Поговорите со своими родителями о том, как их критика повл…
Мои отношения всегда были очень нестабильными, я всегда контролировал эмоции, не мог поддерживать отношения в здоровом ключе.	Понимаю, что могут быть сложности в поддержании стабильных и здоровых отношений. Вот несколько советов, которые могут помочь: 1. Работайте над самоанализом: Попытайтесь понять, какие факторы или поведения могут влиять на ваши отношения. Распознавайте свои эмоции и реакции, чтобы лучше контролировать их. 2. Общайтесь и слушайте партнера: Откройтесь для откровенных разговоров с вашим партнером. Слу…
Сяолин подвергалась издевательствам в колледже, из-за чего она стала неполноценной и подавленной Как я могу помочь ей восстановить уверенность в себе и психическое здоровье?	Расскажите Сяолин, что она не одна в этой ситуации, и многие люди сталкиваются с подобными трудностями в колледже. Предложите ей следующие шаги для восстановления уверенности в себе и психического здоровья: 1. Слушайте и поддерживайте ее: Проявите понимание и сострадание к тому, через что она прошла. Будьте внимательными слушателями и поддержите ее в ее эмоциональном восстановлении. 2. Обратитесь…
Отношения в моей семье были сложными, я часто испытывала стресс и неуверенность, не знала, как с ними справиться и к кому обратиться за помощью.	Я понимаю, что сложности в семейных отношениях могут вызывать душевное напряжение. Важно помнить, что вы не одна в своих переживаниях, и существует множество ресурсов и специалистов, которые могут предложить поддержку и помощь. Вот несколько вариантов, к кому вы можете обратиться: 1. Близкие друзья или родственники: разговор с доверенным человеком может помочь вам выразить свои эмоции и получить …
У меня есть друг, который всегда жалуется и ни к чему не относится положительно. Я думаю, что его негативные эмоции влияют на мои эмоции, и я не знаю, как с ним общаться.	Общаться с людьми, которые постоянно жалуются и отрицательно относятся к окружающему миру, может быть сложно. Вот несколько стратегий, которые вы можете попробовать: 1. Устанавливайте границы: Важно определить, какой уровень отрицательности вы готовы терпеть. Если ваш друг начинает жаловаться, попробуйте оказать поддержку в начале, но если он продолжает негативное поведение, скажите ему, что вы х…
Недавно я обнаружила, что у меня всегда бессонница, даже когда я засыпаю, мне снятся кошмары, и я чувствую тяжесть после пробуждения, что мне делать?	Бессонница и кошмары могут быть очень противными и могут негативно влиять на вашу физическую и эмоциональную здоровье. Вот несколько рекомендаций, которые могут помочь вам справиться с этой проблемой: 1. Создайте ритуал перед сном: Попробуйте создать спокойную атмосферу перед сном, чтобы ваш мозг и тело могли расслабиться. Выполните рутинные задачи перед сном, такие как купание, чт
Иногда при общении с друзьями всегда чувствую, что разговор окончен и нечего сказать	Когда вы сталкиваетесь с такой ситуацией, важно помнить, что это абсолютно нормально и не обязательно постоянно заполнять разговор словами. Вместо этого вы можете сосредоточиться на слушании и проявлении интереса к собеседнику. Вот несколько идей, которые могут помочь вам поддерживать более плодотворные разговоры: 1. Задавайте вопросы: интересуйтесь мнением и опытом своего друга. Это поможет вам …
Над моим ребенком издеваются в школе, и сейчас он очень замкнутый, и я не знаю, как ему помочь.	Я понимаю, что это очень серьезная и тревожная ситуация. Вот несколько шагов, которые вы можете предпринять, чтобы помочь своему ребенку: 1. Поговорите с ребенком: Нежно и терпеливо задайте своему ребенку вопросы о том, что происходит в школе. Выслушайте его и позвольте ему рассказать о своих чувствах и опасениях. 2. Установите контакт с учителями: Обратитесь к учителям, школьному психологу или а…
Всякий раз, когда я общаюсь с людьми, я всегда очень нервничаю, не знаю, что сказать, и боюсь, что скажу не то.	Вот несколько советов, которые могут помочь вам справиться с нервозностью при общении с людьми: 1. Подготовьтесь заранее: если у вас будет представление о том, о чем вы хотите говорить или какие вопросы задать, это снизит ваши нервы. Исследуйте тему обсуждения или подумайте над некоторыми сообщениями, которые могут помочь поддержать разговор. 2. Практикуйтесь: попробуйте заниматься общением с люд…
сякий раз, когда я остаюсь один, я начинаю испытывать необъяснимое чувство страха. Бессознательно управляемый невидимой силой, я чувствую, что меня поймали и заключили в непроницаемую оболочку. Иногда все становится чрезвычайно пугающим.	Понимаю, что такие чувства страха могут быть очень трудными. Важно помнить, что я здесь, чтобы помочь вам. Если вы хотите, я могу предложить несколько стратегий, которые могут помочь справиться с этими чувствами: 1. Разберитесь в своих эмоциях: Возможно, посвящение некоторого времени саморефлексии поможет вам понять, что может быть источником этого страха. Попробуйте записывать свои мысли и эмоци…
Я всегда был слишком строг к себе и чувствовал, что недостаточно хорош, чтобы меня любили и ценили.	Я понимаю, что самокритика и строгое отношение к себе могут быть тяжелыми и влиять на самооценку. Важно помнить, что каждый человек имеет свои сильные стороны и достоинства. Попробуйте посмотреть на себя с более доброжелательной перспективы и относиться к своим ошибкам как к возможностям для роста и самоусовершенствования. Подумайте о своих достижениях и положительных качествах, которые вас отлич…
Моя жизнь - это просто постоянное разочарование, я терплю неудачу, что бы я ни делал, я чувствую, что ничего не стою.	Я сожалею слышать, что вы чувствуете такое разочарование и неуверенность в себе. Важно помнить, что все мы испытываем неудачи и разочарования в жизни, это естественная часть нашего пути. Важно не воспринимать их как признак того, что вы ничего не стоите. Возможно, стоит переосмыслить свои ожидания, чтобы они были более реалистичными и достижимыми. Разбейте большие цели на более маленькие, немного…
Другие всегда издеваются надо мной и смотрят на меня свысока. Я чувствую, что я бесполезен и некомпетентен. Я не могу выразить свою истинную силу и способности в социальных ситуациях. Я всегда прячусь в углу.	Я очень сожалею, что вы чувствуете себя таким образом. Быть объектом издевательств и недостаточности может быть очень тяжело, и это может сильно повлиять на наше самоощущение. Однако, важно помнить, что каждый человек имеет свою уникальность и ценность. Вот несколько советов, которые могут помочь вам: 1. Распознайте свои сильные стороны: Сделайте список своих достижений и качеств, в которых вы ув…
Я чувствую себя растерянным и беспомощным в отношении будущего, я не знаю, что мне делать, и я не знаю, чего хочу.	Понимаю, что такое чувство растерянности может быть очень тяжелым. Важно помнить, что это нормальная часть жизни, и многие люди сталкиваются с подобными чувствами в разные периоды своей жизни. Вот несколько идей, которые помогут вам в этой ситуации: 1. Самообследование: Попробуйте проанализировать свои интересы, страхи, ценности и мечты. Задайте себе вопросы типа "Что мне нравится делать?" и "Как…
Я не знаю, почему я всегда слишком много думаю, беспокоюсь о будущем, и мне приходится неоднократно проверять, что я запираю двери и окна каждый раз, когда выхожу на улицу, из-за чего я чувствую себя очень усталой и раздражительной.	Выражение избыточной тревожности, постоянной беспокойства и необходимости повторной проверки действий может указывать на наличие заболевания, известного как обсессивно-компульсивное расстройство (ОКР). ОКР является психическим расстройством, характеризующимся постоянными и непроизвольными мыслями или фантазиями (обсессиями), а также вынужденными повторениями определенных действий (компульсии). Ес…
Я подвергался сексуальному насилию в течение длительного времени, но я все еще чувствую боль и страдания, как я могу справиться с этой прошлой болью?	Я сожалею, что вам пришлось столкнуться с таким ужасным опытом. Это важно осознавать, что процесс заживления от такой травмы может быть долгим и индивидуальным для каждого человека. Однако, есть несколько вещей, которые вы можете попробовать для справления с этой болью: 1. Поиск помощи профессионала: Распространенное решение – обратиться за помощью к лицензированному терапевту или психологу, особ…
Я чувствую, что в моей жизни нет смысла и цели, и я не могу найти то, чем я действительно хочу заниматься. Это чувство растерянности причиняет мне очень много боли.	Я понимаю, что это чувство растерянности может быть очень болезненным. Однако не беспокойтесь, потому что многие люди испытывают подобные чувства на разных этапах жизни. Важно помнить, что нахождение смысла жизни и своей цели - это постоянный процесс, который может потребовать времени и самоисследования. Вам может быть полезно задаться несколькими вопросами: Что приносит вам наибольшую радость и …
Однажды я обнаружил способ сбежать из своего реального мира: положить голову на диван, заткнуть уши, не прислушиваться к внешним звукам и позволить себе полностью погрузиться в мир, где есть только я. Когда я попаду в этот мир, все мои проблемы исчезают.	Понимаю, что иногда нужно немного отвлечься от реальности и насладиться моментом наедине с собой. Позволить себе пережить время без проблем может быть очень важно для нашего эмоционального и психического благополучия. Однако, важно помнить, что этот способ - всего лишь побег от проблем, а не их решение. Я могу посоветовать вам рассмотреть также другие способы, которые помогут вам справиться с выз…
Я часто чувствую себя одинокой и беспомощной, чувствуя, что меня никто не понимает и не поддерживает, даже если вокруг меня есть люди, я буду чувствовать себя отчужденной. Эти эмоции делают меня очень подавленной и негативной, а иногда они могут вызывать тревогу и депрессивные симптомы.	Я понимаю, что это чувство одиночества и беспомощности может быть очень трудным. Важно помнить, что вы не одиноки в своих эмоциях и многие люди переживают похожие чувства. Поддержка и понимание со стороны других людей могут быть непосредственными, но существуют также другие способы облегчить эти эмоции. Одним из способов помочь справиться с ощущением одиночества и отчуждения является общение. Поп…
Одно твое слово может разбить мне сердце.	Извините, если я сказал или написал что-то, что вызвало у вас боль или оскорбление. Никогда не было моей целью причинить кому-либо вред. Если вам нужна помощь или поддержка, я всегда здесь, чтобы помочь вам.
Я крайне неудовлетворен своим внешним видом и телосложением, часто испытываю низкую самооценку и тревогу.	Я понимаю, что низкая самооценка и тревога относительно внешнего вида и телосложения могут быть трудными чувствами. Однако, важно помнить, что каждый человек уникален и красив на свой собственный способ. Вот несколько советов, которые могут помочь вам повысить уверенность в себе: 1. Сфокусируйтесь на вещах, которые вам нравятся в себе. Найдите положительные стороны своей внешности и телосложения …
Я действительно не знаю, что я делаю. Я всегда понятия не имею, что я делаю, и это меня очень расстраивает.	Начнем с того, что никто не является экспертом во всех областях и никто не может знать все. Важно помнить, что каждый имеет сильные и слабые стороны, и это нормально. Если у вас возникло чувство неуверенности и непонимания в том, что делаете, вот несколько рекомендаций: 1. Уточните, что именно вас вводит в замешательство. Попробуйте проанализировать задачу или ситуацию, в которой вы чувствуете се…
Есть много социальных страхов, я не решаюсь общаться с незнакомцами, и мне не нравится появляться в людных местах. Я надеюсь преодолеть эти страхи.	Преодоление социальных страхов может быть сложным процессом, но с верой в себя и некоторыми стратегиями можно достичь успеха. Вот несколько рекомендаций, которые могут помочь вам преодолеть эти страхи: 1. Постепенное наращивание комфорта: Начните малыми шагами, направленными на увеличение вашего комфорта в отношениях с незнакомыми людьми и появлении в людных местах. Например, вы можете попробоват…
Психологи считают, что крайняя степень депрессии может повлиять на физическое и психическое здоровье человека.	Да, это верно. Депрессия может оказывать значительное влияние на физическое и психическое здоровье человека. Физические симптомы депрессии могут включать усталость, бессонницу или избыточный сон, изменение аппетита и веса, боли в теле и проблемы с пищеварением. Психические симптомы часто включают плохое настроение, потерю интереса к радостным событиям, чувство беспомощности и низкую самооценку. К…
Всякий раз, когда я начинаю преследовать цель, я чувствую себя бессильным, и всякий раз, когда я пытаюсь что-то изменить, мне кажется, что мне не хватает смелости.	Ваша реакция вполне естественна. Многие из нас могут испытывать сомнения и беспокойство при попытке достичь поставленных целей или изменить что-то в своей жизни. Важно помнить, что достижение целей требует времени, усилий и настойчивости. Вот несколько советов, которые могут помочь вам в этой ситуации: 1. Разбейте свою цель на более мелкие этапы. Это поможет вам сделать процесс более осознанным и…
Я часто страдаю бессонницей и мне трудно сосредоточиться на работе, потому что я беспокоюсь, что не смогу выполнять работу, которую делаю.	Бессонница может действительно оказывать негативное влияние на вашу концентрацию и производительность на работе. Вот несколько советов, которые могут помочь вам справиться с этой проблемой: 1. Создайте регулярный распорядок дня: Постарайтесь ложиться спать и просыпаться в одно и то же время каждый день, включая выходные дни. Это поможет вашему организму настроиться на регулярный сон. 2. Создайте …
Я чувствую больше боли, чем когда-либо, когда моя семья отвергает мою помощь.	Я сожалею, что вы чувствуете боль из-за отвержения вашей помощи со стороны вашей семьи. Иногда люди могут быть не в состоянии принять или оценить нашу помощь по разным причинам, и это может быть очень болезненно. Важно помнить, что ваша помощь ценна, даже если не всегда признается. Попробуйте выразить свои чувства и разговаривать с членами вашей семьи об этом. Скажите им, как это влияет на вас и …
Я впадаю в депрессию каждый раз, когда сталкиваюсь с трудностями.	Депрессия может быть трудным состоянием, и важно обращаться за помощью, когда сталкиваетесь с трудностями. Вот несколько рекомендаций, которые могут помочь вам справиться с этим: 1. Обратитесь за поддержкой - возможно, вы можете поговорить со знакомым, доверенным другом или членом семьи о вашем состоянии и трудностях, с которыми вы сталкиваетесь. Иногда разговор с кем-то близким может помочь вам …
Я часто чувствую себя подавленным и беспомощным, чувствую, что моя жизнь лишена смысла и ценности, иногда думаю о самоубийстве, но боюсь кому-либо сказать, опасаясь, что меня сочтут слабым человеком и неудачником.	Я обеспокоен вашими чувствами и хотел бы помочь вам. Ваше эмоциональное состояние заслуживает серьезного внимания, и важно поговорить с кем-то, кто сможет поддержать вас. Прежде всего, вы не одиноки в своих борьбах, и многие люди испытывают похожие эмоции на разных этапах своей жизни. Прошу вас рассмотреть возможность обратиться за помощью к профессионалам. Психологи и терапевты специализируются …
У меня есть друг, который всегда чувствует, что он недостаточно хорош, недостаточно умен, недостаточно талантлив или даже не заслуживает заботы, что заставляет меня беспокоиться о его психическом здоровье.	Похоже, ваш друг страдает от низкой самооценки и негативного мировоззрения. Хорошо, что вы заботитесь о его психическом здоровье. Вот несколько способов, которые могут помочь: 1. Будьте поддерживающим присутствием: Просто быть рядом и слушать, когда ваш друг хочет поговорить, может оказать большое влияние. Убедитесь, что он знает, что вы готовы поддержать его и что его чувства имеют значение. 2. …
Я часто чувствую себя подавленным и безнадежным из-за давления на работе и семейных споров.Как я могу избавиться от этих эмоций и сохранить свое психическое здоровье?	Подавление и отчаяние могут быть очень тяжелыми эмоциями, но есть несколько вещей, которые вы можете попробовать, чтобы справиться с ними и поддерживать свое психическое здоровье: 1. Разговаривайте с близкими: Поделитесь своими чувствами и нагрузкой с людьми, которым доверяете, таким как партнер, друзья или семья. Они могут предложить вам поддержку, понимание и ценные советы. 2. Избегайте изоляци…
В последнее время мой разум начал затуманиваться, и я начал беспокоиться о своем психическом здоровье, и это меня пугает.	Я понимаю, что это может быть напуганно. Важно обратить внимание на свое психическое здоровье и принять меры для поддержания его. Вот несколько рекомендаций, которые могут быть полезными: 1. Обратитесь к врачу. Если у вас есть серьезные беспокойства о вашем психическом здоровье, важно посетить врача или психолога. Они смогут провести оценку вашего состояния и предложить подходящие лечебные методы…
Я не осмеливаюсь смотреть в глаза другим. Я всегда чувствую, что я недостаточно хорош, и я еще больше нервничаю. Даже если мои друзья заговорят со мной, я буду продолжать беспокоиться о том, что они думают.	Понимаю, что это может быть трудно для вас. Однако, важно помнить, что большинство людей не зациклены на нас настолько, как мы думаем. Они обычно более заняты своими собственными мыслями и проблемами. Постепенно пытайтесь преодолевать свои страхи. Первые шаги могут быть небольшими и комфортными, например, попробуйте делать контакт глазами с людьми, которые вам доверяют или находятся в комфортной …
Я беспокоюсь о том, что не смогу сохранить свое психическое здоровье и подведу свою семью.	Понимаю, что это может быть очень трудным для вас. Важно помнить, что забота о своем психическом здоровье является приоритетом и поможет вам быть лучшим для своей семьи. Вот несколько практических советов: 1. Обратитесь к специалисту. Если вы чувствуете, что ваше психическое здоровье находится под угрозой, важно обратиться к профессионалу. Психолог или психиатр сможет помочь вам разобраться в ваш…
Я часто чувствую себя одинокой и беспомощной, даже когда меня окружают люди, я чувствую, что никто не понимает мой внутренний мир.	Понимаю, что это может быть очень трудно. Ощущение одиночества и непонимания может быть очень неприятным и ограничивающим. Однако, решение этой проблемы может начаться с того, чтобы открыться окружающим и попытаться найти связь с другими людьми. Первое, что я могу порекомендовать, - это попытаться найти единомышленников или людей, которые разделяют ваши интересы и страстно занимаются тем же, что …
Я чувствую себя очень запутанным в отношении будущего и не знаю, что мне следует делать. Такого рода путаница заставляет меня чувствовать себя очень тревожно и неловко. Я чувствую себя очень запутанным в отношении будущего и не знаю, что мне следует делать. Такого рода путаница заставляет меня чувствовать себя очень тревожно и неловко.	Понимаю, что путаница и неопределенность в отношении будущего могут быть очень тревожными. Вот несколько советов, которые могут помочь вам сориентироваться: 1. Определите свои цели: Попытайтесь выяснить, что именно вы хотите достичь в будущем. Найдите свои страсти и интересы, и подумайте о том, какие шаги нужно предпринять, чтобы достичь желаемого. 2. Разработайте план действий: Создайте конкретн…
Я была сегодня на вечеринке, но все надо мной смеялись, а другие отвергали меня. Я действительно была на грани срыва.	Извините, что вам пришлось это пережить. Это неприятно, когда нас высмеивают или отвергают. Важно помнить, что вечеринки и социальные ситуации могут быть сложными иногда. Каждый человек имеет собственные предпочтения и может реагировать по-разному. Когда мы чувствуем себя на грани срыва, важно обратить особое внимание на самоуход, уход за своим физическим и эмоциональным благополучием. Позвольте …
Я нахожу свои отношения сложными, и мне всегда трудно установить глубокие связи с людьми. Я чувствовал, что не знаю, как ладить с людьми или как общаться, поэтому меня легко изолировать. Я очень хочу иметь настоящих друзей, но не знаю, как их завести.	Понимаю, что это может быть сложная ситуация. Вот несколько советов, которые могут помочь вам установить более глубокие связи с людьми и завести настоящих друзей: 1. Развивайте социальные навыки: Постепенно работайте над своими навыками общения и установления контакта с другими. Это может включать работу над непрерывным развитием навыков слушания, улучшение эмоционального интеллекта и участие в р…
Моя рабочая нагрузка очень велика. Мне приходится каждый день работать сверхурочно и часто засиживаться допоздна. Я чувствую, что мое тело и разум достигли своего предела, но я все еще не могу остановиться. Что мне следует сделать, чтобы избежать коллапса.	Понимаю, что такая ситуация может быть очень тяжелой и истощающей. Вот несколько рекомендаций, которые могут помочь вам избежать коллапса: 1. Оцените свои приоритеты: Переосмыслите свои задачи и определите, что на самом деле является важным и срочным. Постарайтесь сосредоточиться на наиболее значимых делах, чтобы уменьшить свою рабочую нагрузку. 2. Правильное распределение времени: Создайте рабоч…
Я чувствую, что не могу контролировать свои эмоции, и часто выхожу из себя из-за мелочей, из-за чего окружающим людям некомфортно.	Понимаю, как это может быть трудно для вас. Важно помнить, что контроль над эмоциями - это навык, который можно развивать. Вот несколько советов, которые могут помочь вам улучшить контроль над своими эмоциями: 1. Осознавайте эмоции: Постарайтесь уловить свои эмоции на ранней стадии, понять, что именно вызвало ваше возбуждение или раздражение. Запишите эти моменты для лучшего понимания. 2. Практик…
В моей семье не было ни любви, ни теплых слов, ни реального чувства безопасности, только порицание и давление на меня, поэтому я стал более замкнутым и не хотел ни с кем иметь дело.	Я сожалею, что у вас был такой негативный опыт в семье. Бесшабашное критическое отношение и отсутствие поддержки могут иметь негативное влияние на чувство самооценки и социальные связи. Важно понимать, что вина или ответственность за это не лежит на вас. Если вы хотите изменить свою ситуацию, может быть полезно обратиться за помощью к профессионалам, таким как психологи или терапевты. Они могут п…
Я беспокоюсь о своем будущем, я не знаю, добьюсь ли я успеха, смогу ли я реализовать свои мечты.	Если вы беспокоитесь о своем будущем и сомневаетесь в своих возможностях, важно помнить, что каждый человек имеет потенциал для успеха и достижения своих мечт. Вот несколько советов, которые могут помочь вам реализовать свои мечты: 1. Определите свои цели: Поставьте перед собой конкретные и измеримые цели. Это позволит вам ясно представлять, чего вы хотите достичь. 2. Разработайте план действий: …
Я чувствовал, что не могу справиться со стрессом и проблемами в своей жизни, и часто страдал от плохого настроения, беспокойства и бессонницы.	Я могу понять, что это очень трудные ощущения. Стресс и проблемы могут повлиять на нашу эмоциональную и физическую благополучность. Важно найти способы помочь справиться с ними. Хотели бы услышать некоторые способы, которые могут помочь вам справиться с этими чувствами?
Я чувствую себя очень одинокой. Хотя вокруг меня много людей, я всегда чувствую, что не могу по-настоящему сблизиться с ними. Является ли это расстройством отношений?	Ощущение одиночества, несмотря на наличие множества людей вокруг вас, может быть довольно распространенным. Однако, это не обязательно указывает на какое-либо конкретное психологическое расстройство отношений. Возможно, у вас просто не сложились близкие связи с окружающими людьми, или вы можете испытывать некоторые разрушительные убеждения или страхи, которые мешают вам полноценно взаимодействова…
Я очень беспокоюсь о будущем, не знаю, что со мной делать, и не знаю, что готовит будущее.	Беспокойство о будущем - это естественное чувство, с которым сталкиваются многие люди. Важно помнить, что мы не можем предсказать будущее, но у нас есть влияние на то, как мы к нему подходим. Вот несколько советов, которые могут помочь вам справиться с беспокойством: 1. Живите настоящим моментом: Фокусируйтесь на том, что происходит сейчас, и на том, что вы можете контролировать прямо сейчас. Здо…
У меня много проблем в отношениях, я чувствую себя подавленным, беспомощным и не знаю, что делать.	Я понимаю, что это очень тяжело для вас. Когда мы сталкиваемся с проблемами в отношениях, может быть полезно обратиться за помощью. Вот несколько идей, которые могут помочь вам начать решать проблемы: 1. Обратитесь к профессионалу: Психолог или терапевт может помочь вам разобраться в своих эмоциях, выработать стратегии улучшения отношений и научить вас навыкам коммуникации. 2. Общайтесь: Поделите…
Я часто чувствую себя очень усталым, слабым физически и морально, иногда даже возникают мысли о самоубийстве, ощущение, что моя жизнь бессмысленна.	Я очень сожалею, что вы чувствуете себя таким образом. Эти эмоции и мысли могут быть очень трудными, но важно понимать, что вы не одни в своем опыте. Разговаривать об этом с кем-то близким или профессионалом, таким как врач или психолог, может быть полезным для получения поддержки и помощи. Если у вас немедленно возникают мысли о самоубийстве или вы находитесь в кризисе, пожалуйста, обратитесь за…
Иногда я внезапно испытываю сильный страх и панику, мне трудно контролировать свои эмоции и поведение, и это состояние длится долго.	Я понимаю, что это может быть очень тяжело для вас. Чувство страха и паники может быть очень неприятным и влиять на качество вашей жизни. Важно понять, что вы не одни и что есть помощь доступная вам. В первую очередь, я рекомендую вам обратиться к профессионалу, такому как психотерапевт или психолог. Они имеют опыт и знания, чтобы помочь вам разобраться в вашем состоянии и найти пути его облегчен…
Всякий раз, когда я сталкиваюсь с новым вызовом, я так нервничаю и чувствую себя неуверенно, что чувствую, что не могу с этим справиться.	Это совершенно нормально чувствовать себя нервничающим и неуверенным перед новым вызовом. Многие люди испытывают это. Вот несколько советов, которые могут помочь вам справиться с этими чувствами: 1. Подготовьтесь заранее: Изучите информацию о вызове и возможные решения, чтобы вы чувствовали себя более уверенно. Делайте все, что в ваших силах, чтобы быть подготовленным. 2. Разделите вызов на более…
Иногда я внезапно чувствую, что у меня больше нет никаких увлечений, меня ничего не интересует, и я чувствую, что потерял направление и мотивацию.	Бывает, что мы переживаем фазы, когда теряем интерес к прежним увлечениям и не находим новые. Это может быть вызвано различными факторами, такими как стресс, усталость, недостаток вдохновения или изменение жизненных обстоятельств. Важно понимать, что такие фазы являются временными и могут быть преодолены. Вот несколько предложений, которые могут помочь вам восстановить интерес к жизни и найти нов…
Иногда в мое сердце закрадывается неконтролируемая эмоция. Я думаю, что мне делать, если у меня депрессия?	Если у вас есть подозрения на депрессию, рекомендуется следовать следующим шагам: 1. Обратитесь за помощью к профессионалу. Лучше всего обратиться к психологу или психиатру, чтобы они помогли оценить вашу ситуацию и предложили подходящий план лечения. 2. Расскажите о своих эмоциях и состоянии здоровья близким. Поддержка семьи и друзей может оказаться очень важной в вашем пути к выздоровлению. 3. …
Я всегда чувствовал себя очень некомфортно в своем теле и испытывал различные странные симптомы, но врачи сказали, что у меня хорошее здоровье, что заставляет меня чувствовать себя очень тревожным и беспомощным.	Понимаю, что это может быть очень трудно и неприятно для вас. Когда врачи не обнаруживают конкретные проблемы со здоровьем, это может вызывать чувство беспомощности и тревоги. Однако, хорошая новость в том, что существуют другие возможности для разрешения ваших проблем. В первую очередь, рекомендуется обратиться за помощью к психологу или психотерапевту. Они могут помочь вам разобраться в ваших э…
Из-за длительного пребывания в стрессовой обстановке Хуан Сяомин часто страдает бессонницей, не различает утро и ночь и полностью теряет свой ритм.	Бессонница и потеря ритма сна и бодрствования могут быть очень неприятными состояниями. Вот несколько советов, которые могут помочь Хуану Сяомину справиться с этими проблемами: 1. Установите регулярный расписание сна и пробуждения. Постарайтесь каждый день ложиться и вставать в одно и то же время, даже в выходные дни. Это поможет вашему организму восстановить естественный ритм сна. 2. Создайте сп…
Мои отношения с друзьями никогда не были хорошими, я чувствую, что мне трудно заводить настоящих друзей, и это заставляет меня чувствовать себя очень. одиноким	Возможно, существует несколько причин, по которым вам трудно заводить настоящих друзей. Вот несколько советов, которые могут помочь вам улучшить ситуацию: 1. Самооценка: Порой низкая самооценка может стать преградой для установления глубоких дружеских отношений. Работайте над повышением уверенности в себе и положительным отношением к себе. Определите и признайте свои потенциальные качества и дост…
Окружающие всегда думают, что я слишком нервничаю и переживаю по мелочам, как мне самому расслабиться?	Переживания и нервозность могут быть не приятными ощущениями, но есть несколько способов, которые могут помочь вам расслабиться. Вот некоторые из них: 1. Глубокое дыхание: сосредоточьтесь на своем дыхании, делая глубокие вдохи через нос и медленные выдохи через рот. Это помогает снизить уровень стресса и успокоить нервную систему. 2. Медитация: настройтесь на момент и уделите некоторое время для …
Из-за моей бессонницы мне приходится каждую ночь ходить к психиатру.	Бессонница может быть очень изнурительным и неприятным состоянием. Очень важно обратиться за помощью к профессионалу, такому как психиатр, чтобы получить поддержку и лечение. Психиатры специализируются на диагностике и лечении различных психических состояний, включая бессонницу. Важно не забывать, что бессонница может иметь разные причины, поэтому психиатр проведет подробное обследование, чтобы о…
Я чувствую, что не в состоянии противостоять давлению моей семьи и общества, и многого добиться невозможно.	Понимаю, что противостоять давлению семьи и общества может быть сложно и неприятно. Однако, важно помнить, что ваша жизнь и достижения зависят от вас, а не от внешних факторов. Многие успешные люди справляются с подобными проблемами, поскольку они видят свои цели и страстно их преследуют. Рекомендую вам остановиться и задуматься, что именно вы хотите достичь в жизни, и разработать конкретные шаги…
Я чувствую, что мои отношения ухудшаются, ни семья, ни друзья больше не доверяют мне и не поддерживают меня, это заставляет меня чувствовать себя такой потерянной и безнадежной.	Я понимаю, как тяжело вам сейчас. Чувствовать, что ваши отношения ухудшаются и потерять доверие близких людей может быть очень больно и неуверенно. Важно помнить, что всякий раз, когда мы чувствуемся в отчаянии, всегда есть способ двигаться вперед и восстановить отношения. Возможно, начать с самоанализа и понять, что может быть причиной этих сложностей. Может быть, есть какие-то давние обиды или …
Я часто чувствую себя неспособным контролировать свои эмоции и поведение и часто действую импульсивно или агрессивно.	Понимаю, что такие ситуации могут быть трудными для вас. Важно иметь понимание и контроль над своими эмоциями и поведением. Вот несколько советов, которые могут помочь вам: 1. Заметьте свои эмоции: Постарайтесь быть осознанным того, как вы себя чувствуете в различных ситуациях. Узнавайте свои триггеры и обратите внимание на то, как реагируете на них. 2. Вдохновите себя на дыхание: Когда начинаете…
Я часто боюсь быть отвергнутым, поэтому редко высказываю свое мнение.	Понимаю, что страх быть отвергнутым может быть тяжелым и влиять на нашу способность выражать свои мысли и мнения. Однако важно помнить, что каждый имеет право на свое мнение и его выражение. Возможно, вам будет полезно начать постепенно преодолевать этот страх. Можете начать с маленьких шагов, высказывая свое мнение в небольших и безопасных ситуациях. Также обратите внимание на то, что все имеют …
Депрессия начинает медленно развиваться в подростковом возрасте.	Да, это правда. Депрессия может начинаться в подростковом возрасте и развиваться медленно со временем. Подростки сталкиваются с множеством физических, эмоциональных и социальных изменений, которые могут повлиять на их настроение и психическое благополучие. Уровень стресса, давление со стороны ровесников, проблемы в семье или в школе, а также гормональные изменения могут играть роль в развитии деп…
Я чувствую неудовлетворенность своей внешностью и телом, чувствую себя далеко не идеальным и часто чувствую тревогу и неуверенность.	Я понимаю, что неудовлетворенность своей внешностью и телом может быть тяжелым чувством. Однако, важно помнить, что каждый человек уникален и красив по-своему. Если вы хотите изменить свою внешность, то есть несколько вещей, которые могут помочь вам почувствовать себя более уверенно: 1. Здоровый образ жизни: поддерживайте активный образ жизни, употребляйте питательную пищу и уделяйте внимание сво…
Я всегда беспокоюсь о том, что то, что я делаю, недостаточно хорошо, даже если другие хвалят меня, я не могу избавиться от беспокойства.	Беспокойство по поводу собственных достижений и сомнения в себе достаточно распространены. Возможно, вам будет полезно рассмотреть несколько способов работы с этими чувствами: 1. Оценивайте свои успехи объективно: Попробуйте смотреть на свои достижения без предвзятости и сравнивать их с реалистическими ожиданиями. Избегайте слишком строгой самокритики. 2. Прокрастинация хорошая, но ограниченая: С…
Я нахожу, что мне все труднее и труднее концентрироваться. Будь то чтение или выполнение каких-либо действий, я легко отвлекаюсь.	Потеря способности к концентрации может быть вызвана различными факторами, включая стресс, усталость, отвлекающуюся среду или даже недостаток интереса к задаче. Вот несколько советов, которые могут помочь вам улучшить концентрацию: 1. Создайте подходящую рабочую обстановку: выберите тихое место для работы без лишних отвлекающих факторов, таких как телевизор или смартфон. Организуйте свой рабочий …
Я всегда чувствую, что у меня нет никакой ценности, я не знаю, в чем смысл моего существования, и каждый день я чувствую себя опустошенным и беспомощным.	Это нормально временами ощущать недооцененность или потерю смысла. Однако, важно помнить, что каждый человек имеет ценность и дары, которые могут быть уникальными и важными для других. Вот несколько вещей, которые могут помочь вам найти смысл и ценность в своей жизни: 1. Осознавайте свои достижения: Постарайтесь отметить и ценить свои достижения, даже самые маленькие. Например, может быть, вы пом…
Я боялась общения с людьми, боялась быть отвергнутой, осмеянной или неправильно понятой, и часто чувствовала себя одинокой и беспомощной.	Бояться общения с людьми и переживать отвержение, осмеяние и неправильное понимание — это очень распространенные чувства, которые многие люди испытывают. Однако, существуют способы помочь вам преодолеть эти чувства и почувствовать себя более уверенно и поддержанным. Вот несколько советов, которые могут быть полезными: 1. Работайте над своим самооценкой. Попробуйте сосредоточиться на своих достоин…
Я была очень недовольна своей внешностью и фигурой, чувствовала себя некрасивой и непривлекательной, часто думала о пластической операции и похудении, но также беспокоилась о рисках операции, боялась быть осмеянной и отвергнутой окружающими.	Понимаю, что недовольство внешностью может вызывать чувства неуверенности и неудовлетворенности собой. Однако, прежде чем принимать радикальные решения, важно обратиться к качественным специалистам, таким как пластические хирурги и диетологи, чтобы получить профессиональную оценку и рекомендации. Здоровье всегда должно быть на первом месте, поэтому обсудите свои ожидания и сомнения с врачом. Это …
Я часто ложусь спать поздно и работаю сверхурочно, что делает мое физическое состояние все хуже и хуже, но я не могу остановиться, потому что чувствую, что только так я могу доказать свою ценность и способности.	Понимаю, что вы чувствуете себя приставленным к стенке и чувствуете необходимость доказать свою ценность и способности. Однако, ухаживать за своим физическим и эмоциональным здоровьем также крайне важно. Следует помнить, что отдых и регулярный сон являются неотъемлемой частью продуктивности и успеха. Хороший сон помогает отдохнуть мозгу и восстановить физическую энергию, что в свою очередь повыша…
Я чувствую, что становлюсь все более и более зависимым от игр и социальных сетей, как будто эти вещи стали неотъемлемой частью моей жизни. Такого рода зависимость заставляет меня чувствовать себя неспособным освободиться и не потерять себя. Я надеюсь найти способ избавиться от этой зависимости.	Признание того, что вы испытываете зависимость от игр и социальных сетей, уже является первым шагом к преодолению этой проблемы. Вот несколько рекомендаций, которые помогут вам избавиться от зависимости: 1. Определите, какое количество времени вы проводите в играх и социальных сетях. Часто люди не осознают, сколько времени они тратят на эти занятия. С помощью приложений или таймеров отслеживайте …
Меня беспокоило то, что мое настроение всегда то поднималось, то опускалось, иногда я был очень счастлив, а иногда был настолько подавлен, что даже хотел покончить с собой.	Я очень сожалею слышать, что у вас было такое тяжелое периодичное настроение. При переменном настроении и сильных колебаниях эмоций, помимо поддержки психолога, важно позаботиться о своем физическом и эмоциональном здоровье. Например, регулярная физическая активность, здоровое питание, достаточный сон и развлечения могут помочь улучшить настроение.
Иногда я чувствую, что никому нет дела до меня, и я единственный, на кого я действительно могу рассчитывать.	Мне жаль, что вы чувствуете себя таким образом. Но помните, что эмоции субъективны, и вы не одиноки в своих ощущениях. Хотя может показаться, что никому нет дела, на самом деле может быть множество людей, которые заботятся о вас, но просто не выражают этого открыто. Важно открываться и общаться с окружающими, чтобы найти поддержку и понимание. Если вам нужно поговорить с кем-то, я здесь, чтобы по…
В последнее время я часто страдаю бессонницей и постоянно ворочаюсь в постели по ночам.Может ли это быть скрытой психологической проблемой?	Да, бессонница может быть связана с психологическими проблемами. Например, стресс, тревога, депрессия или другие эмоциональные проблемы могут привести к трудностям со сном. Если вы обнаружили, что бессонница проявляется часто и возникает вместе с другими эмоциональными симптомами, то возможно стоит обратиться к специалисту - психологу или психиатру, для того чтобы они смогли провести детальную оц…
Мои отношения с семьей никогда не были хорошими, я чувствую, что они меня не понимают, не уважают, из-за этого я чувствую себя одиноким.	Я понимаю, что негативный опыт отношений с семьей может быть очень трудным и вызывать чувство одиночества. Важно помнить, что семейные отношения могут быть сложными и иногда требуют работы со всех сторон. Однако, есть несколько вещей, которые вы можете попробовать, чтобы улучшить ситуацию: 1. Общение: Поговорите с членами семьи открыто и честно о своих чувствах, дайте им понять, как вы себя чувст…
Я часто чувствую пустоту и одиночество внутри, ищу чем заполнить пустоту, но часто не могу найти правильный способ облегчить это чувство.	Пустота и одиночество – неприятные эмоции, с которыми многие люди сталкиваются. Важно помнить, что есть несколько способов, которыми можно справиться с этими чувствами: 1. Общение с друзьями и близкими: попробуйте поделиться своими эмоциями с людьми, которых вы доверяете. Они могут поддержать вас и помочь избавиться от чувства одиночества. 2. Поиск новых хобби и интересов: изучение новой деятельн…
