# Supplementary material
Source: ML conference proceedings conference paper supplement (https://openreview.net/forum?id=JL42j1BL5h)
Supplement: supplementary_material [file Mental_Health_gpt.xlsx]

## Sheet: Sheet1
Input	Output
A menudo me siento solo e indefenso, nadie puede entenderme, incluso me siento como un perdedor, sin ningún valor y significado, este sentimiento me deprime y me desespera, no sé cómo deshacerme de ellos.	Lamento mucho que estés pasando por esta situación. Sentirse solo, indefenso y sin valor es algo difícil de enfrentar, pero hay formas de lidiar con estos sentimientos. Aquí te brindo algunos consejos para ayudarte a superar estos sentimientos negativos: 1. Confía en ti mismo: Recuerda que eres valioso y significativo. Reconoce tus fortalezas y logros pasados. A veces, tener una perspectiva objet…
Aunque sólo comprara un paquete de patatas fritas, me preocuparía que la gente pensara que es un acto de autocomplacencia por comer demasiado.	Entiendo tu preocupación, pero recuerda que lo más importante es cómo te sientes contigo mismo y tus decisiones. Si solo compras un paquete de patatas fritas porque es lo que te apetece en ese momento, no deberías preocuparte por lo que piensen los demás. Si te preocupa lo que los demás puedan pensar, puedes recordarles que no hay nada de malo en disfrutar un pequeño gusto de vez en cuando. Ademá…
Siempre me sentía cansada e impotente, incapaz de concentrarme en mis tareas o incluso trabajar en las cosas que me interesaban, lo que me frustraba mucho.	Lamento escuchar que te sientes cansada e impotente. El agotamiento y la falta de concentración pueden ser síntomas de varias cosas, como el estrés, la falta de sueño adecuado, una mala alimentación o incluso problemas emocionales. Aquí hay algunas sugerencias que podrían ayudarte: 1. Descanso adecuado: Asegúrate de dormir lo suficiente todas las noches. Intenta establecer una rutina de sueño reg…
Recientemente, no puedo dormir bien, o tengo pesadillas cuando me quedo dormido, y me siento muy cansado y agotado cuando me despierto.	Lamento escuchar que estás teniendo dificultades para dormir y que te sientes cansado y agotado al despertar. Estos problemas pueden ser resultado de diversos factores, pero hay varias estrategias que puedes probar para mejorar tu calidad de sueño. A continuación, te daré algunas recomendaciones: 1. Mantén una rutina de sueño regular: Intenta acostarte y levantarte a la misma hora todos los días,…
Cada vez que voy al médico, no hay mejoría, y mi estado de ánimo empeora, y a menudo caigo en y la autocompasión.	Lamento escuchar que estás pasando por eso. Es comprensible que te sientas frustrado y desanimado si no ves mejoras en tu salud y estado de ánimo después de visitar al médico. Aquí hay algunas sugerencias para ayudarte a sobrellevar esta situación: 1. Comunícate abiertamente con tu médico: Expresa tus preocupaciones y sentimientos, asegurándote de que comprendan tu situación en su totalidad. Esto…
Siempre me sentí aislada y excluida, incluso en las multitudes.	Lamento escuchar que te hayas sentido aislada y excluida. Es muy común que las personas experimenten estos sentimientos en diferentes momentos de sus vidas. Aquí hay algunas sugerencias que te pueden ayudar a abordar esta situación: 1. Reflexiona sobre tus pensamientos y emociones: Tómate un tiempo para reflexionar sobre qué situaciones específicas te han hecho sentir aislada y excluida. Trata de…
Permitirse ser adicto a los juegos o a internet es una presión psicológica invisible	La adicción a los juegos o a Internet puede ser una presión psicológica invisible. A veces, las personas pueden comenzar a usar juegos o Internet como una forma de escape o evasión de la realidad, lo cual puede llevar a una dependencia poco saludable. Esta presión psicológica invisible puede ser difícil de reconocer, ya que no siempre se manifiesta de forma física o evidente. Sin embargo, puede t…
He estado bajo demasiada presión últimamente, me siento muy ansioso todos los días, no duermo bien, tengo dolor de cabeza, mi corazón late rápido y siento que voy a colapsar en cualquier momento	Lamento escuchar que estás pasando por un momento estresante y ansioso. Recuerda que siempre es importante cuidar de tu bienestar físico y emocional. Aquí tienes algunos consejos que pueden ayudarte a manejar la presión y reducir la ansiedad: 1. Respiración profunda: Tómate unos minutos cada día para practicar la respiración profunda. Inhala lenta y profundamente por la nariz, mantén la respiraci…
Cada vez que encuentro dificultades y contratiempos, siempre pierdo la confianza y la motivación y siento que no puedo manejarlo.	Entiendo que puede ser bastante desalentador enfrentar dificultades y contratiempos, y es normal sentirse así en ocasiones. Sin embargo, es importante recordar que todos enfrentamos obstáculos en la vida y que la manera de responder a ellos puede hacer una gran diferencia. Aquí hay algunos consejos que podrían ayudarte a manejar mejor estas situaciones: 1. Reflexiona sobre tus logros pasados: Tóm…
Siempre me preocupa que lo que estoy haciendo no sea lo suficientemente bueno, y siento que otras personas me juzgan constantemente, y es deprimente.	Entiendo cómo te sientes. La preocupación y el miedo a ser juzgado por los demás son sentimientos comunes. Aquí hay algunas sugerencias para ayudarte a manejar esta situación y sentirte mejor contigo mismo: 1. Reconoce tus logros: En lugar de centrarte en lo que crees que no estás haciendo bien, enfócate en tus logros y reconocer tus propias fortalezas. Haz una lista de tus éxitos pasados ​​y rec…
Siempre me preocupaba si estaba haciendo todo bien y tenía miedo de lo que pensarían o criticarían los demás, y como resultado, a menudo me sumergía en una dolorosa duda.	Es normal preocuparse sobre si estamos haciendo las cosas bien y cómo nos percibe la gente. Sin embargo, constantemente preocuparse por la opinión de los demás puede generar dudas y una sensación de malestar. Aquí tienes algunas ideas para ayudarte a manejar eso: 1. Reconoce tus logros: En lugar de enfocarte en lo que crees que podrías estar haciendo mal, reflexiona sobre tus logros y éxitos. Rec…
Callarme no dejar la emoción salir, sentir siempre que voy a explotar, no poder esconderme de los ojos de los demás	Lo siento si estás pasando por un momento difícil y te sientes abrumado. A veces guardar nuestras emociones puede resultar agotador y afectar nuestra salud mental. Recuerda que es importante cuidar de ti mismo y buscar apoyo si lo necesitas. No tienes que enfrentar todo por ti mismo. Puedes hablar con alguien en quien confíes, como un amigo cercano o un profesional de la salud mental, para desaho…
Mi familia sufrió un accidente repentino y mis padres resultaron gravemente heridos, lo que me hizo sentir indefensa y deprimida, llegando a mostrar síntomas de depresión.	Lamento mucho escuchar sobre el accidente y los graves heridos que resultaron tus padres. Es comprensible que te sientas indefensa, deprimida y experimentes síntomas de depresión en una situación tan difícil. Es importante recordar que no estás sola y que hay ayuda disponible para ti y tu familia. Aquí hay algunas sugerencias de lo que puedes hacer en esta situación: 1. Busca apoyo emocional: Hab…
Me encontraba cada vez menos cómodo con la gente, siempre prefería estar solo, no me interesaba socializar ni compartir mi vida con los demás, esta soledad me hacía sentir muy deprimido	Lamento escuchar que te estás sintiendo deprimido debido a tu soledad. Puede ser difícil enfrentar estas emociones, pero no estás solo y hay cosas que puedes hacer para ayudarte a sentir mejor. Aquí hay algunos consejos que podrían ser útiles: 1. Busca apoyo: Considera hablar con un profesional de la salud mental, como un psicólogo o terapeuta, quien puede brindarte el apoyo necesario para enfren…
Tengo un fuerte deseo de controlar y siempre quiero controlar todo en mis propias manos, y no permito que otros interfieran o se entrometan, lo que conduce a la ruptura de las relaciones interpersonales.	Entiendo que tener un fuerte deseo de controlar puede ser un desafío en las relaciones interpersonales. Aquí hay algunos consejos que podrían ser útiles: 1. Reflexiona sobre tus motivos: Pregúntate por qué sientes la necesidad de controlar tanto. A menudo, esto puede estar relacionado con el miedo a perder el control o la seguridad. Tomar conciencia de estos motivos puede ayudarte a comprender me…
menudo siento que mi mente es muy caótica, como si hubiera demasiados pensamientos y voces en mi cabeza al mismo tiempo, lo que me hace sentir muy confundido y perdido.	Lamento escuchar que te sientes así. Puede ser abrumador tener muchos pensamientos y voces en la cabeza al mismo tiempo. Aquí tienes algunas estrategias que podrían ayudarte a lidiar con esa sensación de caos mental: 1. Toma descansos regulares: Tómate tiempo para desconectar y descansar tu mente. Haz pausas durante el día y dedica tiempo a actividades que te relajen, como caminar al aire libre, …
Por qué mi familia me critica por todo lo que hago	Entiendo que puede ser frustrante y confuso cuando tu familia te critica constantemente por todo lo que haces. Aquí hay algunas posibles razones por las que podría estar sucediendo: 1. Expectativas irreales: Tu familia puede tener expectativas poco realistas sobre cómo deberías comportarte, actuar o lograr cosas en la vida. Esto puede crear una brecha entre lo que esperan y lo que tú quieres o pu…
Recientemente, siempre me siento agotado y sin energía todos los días, incluso después de dormir durante mucho tiempo, no mejora.	Lamento escuchar eso. Sentirse agotado y sin energía constantemente podría deberse a una variedad de factores. Aquí tienes algunas posibles razones y consejos sobre cómo mejorar tu energía: 1. Dormir suficiente: Asegúrate de dormir lo suficiente cada noche. La cantidad de sueño necesaria varía según cada persona, pero generalmente entre 7 y 9 horas es recomendable. 2. Calidad del sueño: No solo e…
Siento que he perdido toda motivación y esperanza y la vida se siente sin sentido	Lamento escuchar que te sientas así. La pérdida de motivación y esperanza puede ser un sentimiento abrumador, pero es importante recordar que no estás solo y hay formas de abordar esta situación. Aquí hay algunos consejos que podrían ayudarte a encontrar algún sentido en tu vida: 1. Identifica tus valores: Reflexiona sobre lo que es realmente importante para ti y qué te hace sentir vivo. Puede se…
Me siento muy nervioso a veces, y también me siento deprimido a veces, pero no sé cómo cambiar mi estado de ánimo.	Lamento escuchar que estás experimentando ansiedad y depresión. Aquí tienes algunas sugerencias que podrían ayudarte a cambiar tu estado de ánimo: 1. Establece una rutina diaria: Tener una rutina estructurada puede brindarte una sensación de estabilidad y control en tu vida diaria. 2. Mantén una alimentación saludable: Una dieta equilibrada y nutritiva puede contribuir a mejorar tu estado de ánim…
Tengo problemas con mi pensamiento y percepción, y a menudo escucho sonidos extraños o veo cosas extrañas, lo que me hace sentir muy asustado.	Lamento escuchar que estás pasando por esto. Puede ser angustiante experimentar problemas con el pensamiento y la percepción. Es importante que consultes a un profesional de la salud mental para obtener un diagnóstico adecuado y un tratamiento apropiado. Un psicólogo o psiquiatra puede ayudarte a comprender mejor lo que estás experimentando y a desarrollar estrategias para manejarlo. Mientras tan…
A menudo me siento tenso y ansioso, incapaz de controlar mis emociones y el estrés, lo que me hace sentir muy inquieto e inquieto.	Lamento escuchar que te sientes así. La tensión y la ansiedad pueden ser desafiantes de manejar, pero hay algunas técnicas que puedes probar para ayudar a controlar tus emociones y reducir el estrés. Aquí tienes algunas sugerencias: 1. Respiración profunda: Toma respiraciones lentas y profundas, inhalando por la nariz y exhalando por la boca. Esto puede ayudar a calmar tu sistema nervioso y reduc…
A menudo me siento solo e indefenso, y me siento vacío incluso cuando tengo a alguien a mi alrededor. No sé por qué sucede esto, ¿cómo puedo pedir ayuda?	Lamento escuchar que te sientes solo, indefenso y vacío a pesar de tener a alguien a tu alrededor. Es importante recordar que buscar ayuda es un primer y valiente paso hacia el bienestar emocional. Aquí hay algunas sugerencias sobre cómo puedes pedir ayuda: 1. Comunícate: Habla con alguien en quien confíes, como un amigo cercano o un miembro de tu familia. Expresa tus sentimientos y explícales lo…
He estado traumatizado en el pasado, y ahora siempre recuerdo esa experiencia con miedo y dolor, y necesito buscar ayuda para superar esta emoción.	Lamento mucho escuchar que estás pasando por esta difícil situación. Es importante reconocer que buscar ayuda es un paso valiente y significativo para superar el trauma. Aquí hay algunas sugerencias sobre cómo puedes buscar apoyo: 1. Busca ayuda profesional: Considera hablar con un terapeuta o consejero especializado en trauma. Ellos tienen la capacitación necesaria para ayudarte a procesar tus e…
No puedo deshacerme de los recuerdos del pasado, y cada vez que pienso en ciertas cosas, siento mucho dolor, e incluso afecta mi vida diaria.	Lamento escuchar que estás experimentando dolor por los recuerdos del pasado y que eso está afectando tu vida diaria. No es inusual que ciertos recuerdos dolorosos persistan y sigan causando malestar. Aquí tienes algunas sugerencias para ayudarte a lidiar con esta situación: 1. Acepta tus sentimientos: Reconoce y acepta que estás experimentando dolor por esos recuerdos. Validar tus emociones pued…
Solía ser acosado y ahora, cada vez que pienso en ello, siento miedo e incluso tengo pesadillas.	Lamento escuchar eso. El acoso puede tener un impacto duradero en la salud emocional y mental de una persona. Es comprensible que sientas miedo y tengas pesadillas cuando recuerdas esos momentos. Aquí hay algunos consejos que podrían ayudarte a lidiar con estos sentimientos negativos: 1. Busca apoyo: Considera hablar con alguien de confianza, como un amigo, un familiar o un terapeuta. Compartir t…
Me siento cada vez más solo, sin amigos, sin parientes, incluso si alguien está cerca, me siento muy vacío e incómodo.	Lamento mucho que te sientas de esta manera. La soledad puede ser una experiencia muy difícil de enfrentar. Es importante recordar que no estás solo en este sentimiento, ya que muchas personas pasan por momentos similares en sus vidas. Aquí tienes algunos consejos que podrían ayudarte a lidiar con la soledad: 1. Busca ayuda profesional: Considera hablar con un terapeuta o consejero, quienes puede…
Siempre siento que no puedo concentrarme, es difícil completar las tareas y, a menudo, estoy cansado y deprimido.	Lamento escuchar que estás experimentando dificultades para concentrarte y completar tareas, y que también te sientes cansado y deprimido. Estos síntomas pueden ser un indicio de diferentes situaciones, por lo que es importante buscar ayuda profesional para obtener un diagnóstico adecuado. Aquí hay algunas cosas que puedes considerar: 1. Habla con un profesional de la salud: Un médico, terapeuta …
A menudo me siento solo y perdido, incapaz de establecer relaciones cercanas con los demás, e incluso pierdo el interés y el entusiasmo por las personas y las cosas que me rodean.	Lamento escuchar que te sientes solo y perdido. Es importante recordar que todos pasamos por momentos así en la vida, y es algo normal. Aquí tienes algunos consejos para enfrentar y superar esos sentimientos: 1. Reflexiona sobre ti mismo: Tómate un tiempo para examinar tus propios pensamientos y sentimientos. Intenta entender por qué te sientes así y si hay algún patrón detrás de tus relaciones c…
Me siento solo y perdido y no siento que pueda entablar relaciones cercanas con otras personas, lo que me hace sentir muy deprimido e indefenso.	Lamento escuchar que estás pasando por momentos difíciles. Sentirse solo y perdido puede ser realmente abrumador. Aunque soy un asistente virtual, estoy aquí para brindarte apoyo y algunas sugerencias que podrían ayudarte en este proceso. Recuerda que siempre es importante hablar con un profesional de salud mental si tus sentimientos de tristeza o depresión persisten o empeoran. 1. Busca apoyo: H…
Todos a mi alrededor están felices, pero me siento vacío por dentro, incapaz de disfrutar de ninguna alegría.	Lamento escuchar que te sientes de esa manera. Es importante recordar que todos pasamos por momentos de tristeza o sensación de vacío en algún momento de nuestras vidas. Aquí hay algunas sugerencias que pueden ayudarte en este momento: 1. Permítete sentir: Es normal tener emociones negativas y está bien reconocerlas. No te juzgues por sentirte de esta manera y date tiempo para procesar tus sentim…
Mi autoestima es muy baja, a menudo me siento inútil e insignificante, lo que me hace no atreverme a perseguir mis sueños y objetivos, tener miedo al fracaso y ser despreciado por los demás.	Lamento escuchar que estás pasando por un momento difícil con tu autoestima. Es normal tener altibajos en la confianza en uno mismo, pero es importante recordar que eres valioso y capaz. Aquí tienes algunas sugerencias para ayudar a mejorar tu autoestima: 1. Celebra tus logros: Reconoce tus éxitos, por pequeños que sean. Escribe una lista de tus logros pasados y recuerda que tienes la capacidad d…
He descubierto que me he vuelvo demasiado sensible a las cosas y, a menudo, me siento inquieto y preocupado por las cosas pequeñas.	Entiendo cómo te sientes. La sensibilidad puede manifestarse de diferentes maneras y afectar nuestra vida diaria. Aquí te dejo algunas sugerencias que podrían ayudarte a manejar esa sensibilidad: 1. Autoconocimiento: Tómate un momento para reflexionar sobre tus emociones y reconocer los desencadenantes que te hacen sentir inquieto o preocupado. Esto te ayudará a entender mejor cómo reaccionas ant…
Mis padres siempre tuvieron grandes expectativas de que yo fuera una buena persona, pero sentía que no estaba a la altura de sus estándares, estaba ansiosa y con baja autoestima.	Entiendo cómo te sientes. Vivir bajo la presión de las expectativas de los padres puede ser desafiante y puede llevar a la ansiedad y la baja autoestima. Es importante recordar que todos somos seres humanos imperfectos y es normal tener altibajos en la vida. Aquí hay algunas sugerencias para lidiar con esta situación: 1. Comunícate con tus padres: Expresa tus sentimientos y preocupaciones abierta…
Sueño todos los días, repitiéndolo una y otra vez, como perdido en un laberinto sin salida.	Parece que te sientes atrapado en tu sueño, repitiéndolo constantemente como si estuvieras en un laberinto sin salida. Es importante tener en cuenta que los sueños a menudo pueden reflejar nuestros pensamientos, emociones y situaciones de la vida real. Si te sientes atrapado en un ciclo de sueños repetitivos, aquí hay algunas sugerencias que podrían ayudarte: 1. Mantén un diario de sueños: llevar…
Cada vez que estoy solo, pienso en todo lo que pasó antes, y todo me hace sentir tan miserable	Lo siento mucho que te sientas así cuando estás solo. Puede ser difícil enfrentar los pensamientos y recuerdos que te hacen sentir miserable. Aquí hay algunas sugerencias que podrían ayudarte: 1. Permítete sentir: Es normal sentir tristeza y nostalgia al recordar eventos pasados difíciles. Permítete sentir esas emociones y déjalas salir. 2. Practica la autocompasión: Trátate con amabilidad y comp…
Cuando veo mi cuerpo, me siento tan feo, tan mal	Lamento escuchar que te sientes así acerca de tu cuerpo. Es importante recordar que la belleza viene en diferentes formas, tamaños y colores, y cada persona es única y hermosa a su manera. A veces, podemos ser muy críticos con nosotros mismos y enfocarnos en nuestras supuestas imperfecciones. Sin embargo, es importante cuidar de nuestra salud física y emocional. Si te sientes incómodo o insatisfe…
Tengo autismo, no sé cómo comunicarme con los demás, me siento aislado en un mundo completamente diferente, me siento muy miserable e indefenso.	Lamento mucho que te sientas así. Entiendo que puede ser desafiante para las personas con autismo comunicarse con los demás, pero quiero asegurarte que hay esperanza y formas de mejorar tu situación. Aquí te dejo algunos consejos que podrían ayudarte: 1. Busca apoyo: Habla con profesionales especializados en autismo, como terapeutas o psicólogos que hayan trabajado con personas con estas necesida…
Una vez fui traicionado por un amigo, me dolió mucho, comencé a dudar de la confiabilidad de la humanidad y la amistad, e incluso comencé a cerrarme a mí mismo y alejarme de los demás.	Lamento escuchar que pasaste por una experiencia tan dolorosa. La traición de un amigo puede ser extremadamente difícil de manejar y puede llegar a afectar nuestra perspectiva sobre la confianza y las relaciones en general. Es normal sentirse así después de haber sido traicionado, pero es importante recordar que no todos los individuos son iguales. Aquí hay algunas sugerencias sobre cómo superar …
En la sociedad actual, las personas a menudo se dan por vencidas o incluso se suicidan porque no pueden completar su trabajo.	Me preocupa escuchar que las personas se sientan tan abrumadas por el trabajo que consideren el suicidio. Es importante recordar que la salud mental es tan importante como la salud física. Si alguien está experimentando dificultades, es crucial que busque apoyo adecuado y se comunique con personas de confianza, como amigos, familiares o profesionales de la salud mental. Si alguien se siente abrum…
Siempre estaba pensando en mi pasado y mi futuro, sintiéndome ansioso y molesto por ello, sin saber qué hacer con él.	Entiendo cómo te sientes. A veces, pensar demasiado en el pasado y el futuro puede generar ansiedad y malestar. Aquí hay algunas sugerencias que podrían ayudarte: 1. Practica la atención plena: La atención plena te ayuda a conectarte con el presente y a disfrutar más del momento actual. Intenta centrarte en lo que estás haciendo en este momento, prestando atención a tus sentidos y emociones. 2. H…
Siempre me siento incómodo cuando estoy frente a un gran grupo de personas.	Es común sentirse incómodo o nervioso al estar frente a un gran grupo de personas, y esto puede deberse a diferentes razones. Aquí hay algunas sugerencias para ayudarte a sentirte más cómodo en estas situaciones: 1. Practica y prepárate: Antes de enfrentarte a un gran grupo de personas, practica lo que vas a decir o hacer. Esto te ayudará a sentirte más seguro y preparado. 2. Respira y relájate: …
Estoy insatisfecho con mi apariencia y siempre me siento feo, lo que me hace muy inseguro para socializar y hacer amigos ¿Cómo puedo cambiar esta mentalidad?	Entiendo cómo te sientes y es algo que muchas personas experimentan en algún momento de sus vidas. Aquí te brindo algunos consejos para ayudarte a cambiar esa mentalidad negativa: 1. Reconoce tus cualidades positivas: Tómate un momento para reflexionar sobre tus características y habilidades que te hacen único y especial. Enfócate en tus fortalezas y recuerda que la belleza se encuentra en la div…
Estoy lleno de miedo y ansiedad por el futuro, y no sé cómo lidiar con los desafíos y las presiones del futuro.	Entiendo que puedas sentir miedo y ansiedad por el futuro, ya que enfrentar los desafíos y las presiones puede ser abrumador. Sin embargo, hay algunas estrategias que puedes utilizar para lidiar con estos sentimientos. Aquí hay algunos consejos: 1. Respira profundo y enfócate en el presente: En lugar de dejar que tu mente se preocupe por lo desconocido que puede suceder en el futuro, concéntrate …
A menudo me encontraba atrapada en un bucle de pensamientos imparable, pensando en el mismo problema o situación una y otra vez, incapaz de detenerme, lo que disminuía la calidad del sueño y perturbaba mi vida cotidiana.	Entiendo que estar atrapado en un bucle de pensamientos puede ser agotador y perturbador. Aquí hay algunas estrategias que podrías probar para ayudar a romper ese ciclo y mejorar tu bienestar: 1. Practica la conciencia plena: La conciencia plena implica estar presente en el momento presente sin juzgar los pensamientos o sensaciones. Puedes hacer esto prestando atención a tu respiración o enfocánd…
He tenido algunas experiencias traumáticas que se han quedado conmigo. Me resultó difícil procesar estas emociones y recuerdos, lo que provocó que mi salud mental se deteriorara gradualmente.	Lamento escuchar que has tenido experiencias traumáticas y que estás lidiando con el impacto en tu salud mental. Es importante que busques apoyo y ayuda para superar estas dificultades. Aquí hay algunas sugerencias para cuidar tu salud mental: 1. Terapia: Considera buscar la ayuda de un profesional de la salud mental, como un terapeuta o psicólogo. Ellos pueden brindarte las herramientas y el apo…
A menudo me siento frustrado y deprimido, pierdo el placer y la motivación de vivir, no tengo confianza en el futuro, esta emoción me hace sentir muy doloroso e indefenso.	Lamento escuchar que estés experimentando tantos sentimientos negativos. No estás solo, y es importante que busques apoyo en estos momentos difíciles. Aquí hay algunas sugerencias que podrían ayudarte: 1. Habla con alguien de confianza: Compartir tus sentimientos con un amigo cercano o un miembro de la familia puede ser reconfortante. A menudo, solo expresar tus emociones y desahogarte puede aliv…
Recientemente, sus hijos a menudo pierden los estribos e incluso destruyen artículos en la casa, lo que puede ser un síntoma de depresión.	Lamento escuchar que sus hijos están experimentando problemas emocionales y destructivos en casa. Como asistente virtual, no soy un profesional de la salud mental, pero puedo proporcionarle algunos consejos generales para lidiar con situaciones como esta. Recuerde que es importante buscar la ayuda de un profesional para obtener un diagnóstico y tratamiento adecuados. 1. Comunicación abierta: Anim…
A menudo me siento estresado y ansioso, incluso las cosas pequeñas pueden hacerme sentir inquieto y tenso, es difícil relajarme y disfrutar de la vida.	Lamento escuchar que te sientes estresado y ansioso. El estrés y la ansiedad son problemas comunes en la vida moderna, pero hay varias estrategias que puedes probar para ayudarte a relajarte y encontrar un equilibrio en tu día a día. Aquí hay algunas sugerencias: 1. Identifica las causas: Trata de identificar las situaciones o pensamientos que te generan estrés. Reconocer estas causas te ayudará …
Estoy muy insatisfecha con mi cuerpo, siempre me siento demasiado gorda o demasiado delgada, y no sé cómo aceptar mi cuerpo.	Lamento que te sientas de esa manera acerca de tu cuerpo. Muchas personas experimentan inseguridades y presiones relacionadas con la imagen corporal. Aquí hay algunos consejos que podrían ayudarte a aceptar tu cuerpo: 1. Reconoce tus emociones: Permítete sentir y entender tus emociones en relación con tu cuerpo. La aceptación comienza por reconocer y validar tus sentimientos. 2. Cuida de ti misma…
Me falta confianza en mi propio desempeño y habilidad, siempre siento que no puedo hacerlo bien y tengo miedo de fallar y de que los demás se rían de mí.	Entiendo cómo te sientes. La falta de confianza puede ser desafiante, pero es algo que se puede trabajar y mejorar. Aquí hay algunas sugerencias para ayudarte a desarrollar más confianza en ti mismo: 1. Identifica tus fortalezas: Reconoce tus habilidades y logros pasados. Haz una lista de tus fortalezas y recuérdalas cuando te sientas inseguro. 2. Establece metas realistas: Fíjate objetivos alcan…
Mi estado de ánimo fluctuó salvajemente, de muy alto a muy bajo, sin ningún patrón.	Comprendo que experimentar fluctuaciones de ánimo puede ser desafiante. Es importante recordar que los cambios en el estado de ánimo pueden ser normales en determinadas situaciones y en la vida en general. Sin embargo, si estas fluctuaciones son excesivas o afectan tu calidad de vida, te recomendaría considerar hablar con un profesional de la salud mental, como un psicólogo o psiquiatra, para obt…
Cuando estoy en una multitud, siempre me siento ignorado, o incluso inexistente, lo que me hace sentir muy solo y perdido.	Lamento escuchar que te sientes de esa manera cuando estás en una multitud. Es comprensible que puedas sentirte ignorado o invisible en este tipo de situaciones, ya que puede haber mucha estimulación y distracciones a tu alrededor. Aquí hay algunos consejos que podrían ayudarte a sentirte más conectado y menos solo en estas situaciones: 1. Reconoce tus pensamientos y sentimientos: Es importante s…
A menudo siento que no soy lo suficientemente bueno para ganarme la aprobación y el respeto de los demás.	Lo siento mucho de que te sientas así, pero quiero recordarte que eres valioso y digno de amor y respeto, independientemente de lo que piensen los demás. Aquí hay algunos consejos para ayudarte a cambiar esa percepción negativa de ti mismo: 1. Reconoce tus fortalezas: Todos tenemos habilidades y cualidades únicas. Tómate un momento para identificar tus fortalezas y reconocer los logros que has te…
Me siento confundido e impotente ante el futuro, no sé en qué dirección ir, me hace sentir muy ansioso e inquieto	Entiendo cómo te sientes. La incertidumbre sobre el futuro puede ser abrumadora y generar ansiedad. Aquí hay algunas sugerencias para manejar tus sentimientos y encontrar una dirección: 1. Reflexiona sobre tus metas y valores: Conócete a ti mismo y determina qué es realmente importante para ti en la vida. Define tus metas a corto y largo plazo basadas en esos valores. 2. Haz una lista de tus fort…
Siempre me preocupaba que mis acciones y decisiones fueran criticadas y desaprobadas por otros, lo que me hacía sentir muy insegura y frustrada.	Es comprensible que te preocupara cómo los demás podrían juzgar tus acciones y decisiones. Muchas personas experimentan inseguridad y frustración cuando sienten que podrían ser criticadas o desaprobadas por los demás. Aquí hay algunos consejos que podrían ayudarte a manejar esa preocupación: 1. Reconoce tus propias fortalezas y valores: Reflexiona sobre tus propias cualidades y lo que consideras …
Quiero suicidarme pero no me atrevo, solo quiero esconderme y nunca volver a salir.	Lo siento mucho escuchar que estás pasando por un momento tan difícil, pero no puedo proporcionarte la ayuda que necesitas. Te animo a buscar apoyo en personas que te rodean, como amigos, familiares o profesionales de la salud mental.
Mi familia siempre me critica y me hace sentir muy herida, no se como comunicarme con ellos, se han vuelto tan distantes conmigo	Lamento escuchar que te sientes herida y distante de tu familia. A veces, la comunicación puede ser difícil, pero hay algunos pasos que puedes seguir para intentar mejorar la situación: 1. Reflexiona sobre tus sentimientos: Antes de intentar comunicarte con tu familia, trata de entender tus propios sentimientos. ¿Por qué te sientes herida? ¿Cuál es la razón de esa distancia entre ustedes? A veces…
Solía frustrarme por cosas pequeñas, tenía problemas para recuperarme de los bajos niveles emocionales y me sentía inútil.	Lamento escuchar que te sentías así anteriormente. Superar los bajos niveles emocionales y los sentimientos de frustración puede llevar tiempo, pero hay algunas estrategias que podrían ayudarte a sentirte mejor. 1. Reflexiona sobre tus expectativas: A veces, nuestras frustraciones provienen de expectativas poco realistas o de compararnos constantemente con los demás. Trata de ser consciente de tu…
Solía sufrir el acoso de mis compañeras, lo que me llevó a un largo periodo de baja autoestima y miedo al rechazo.	Lamento mucho escuchar que has pasado por esa difícil situación de acoso por parte de tus compañeras. El acoso puede tener un impacto negativo en nuestra autoestima y bienestar emocional. Es importante recordar que no eres responsable de las acciones de los demás, y el acoso no define quién eres como persona. Aquí hay algunos pasos que puedes seguir para ayudar a reconstruir tu autoestima y super…
Últimamente siempre siento que mi estado de ánimo fluctúa mucho, a veces estoy feliz, pero a veces estoy deprimida sin razón, esto me hace sentir muy preocupada, no sé si estoy sufriendo de depresión.	Lamento escuchar que estás pasando por fluctuaciones en tu estado de ánimo. Es importante recordar que como asistente no puedo diagnosticar condiciones de salud mental, pero puedo ofrecerte información general y sugerencias para manejar tus emociones. Las variaciones en el estado de ánimo pueden ser causadas por diferentes factores, como el estrés, cambios hormonales, problemas emocionales o situ…
Estaba tan estresado que sentí que me iba a abrumar, a menudo me sentía nervioso o sin aliento.	Lamento escuchar que te sientes estresado y abrumado. Estos sentimientos son comprensibles, pero es importante que encuentres formas de manejar y reducir tu estrés. Aquí tienes algunas sugerencias que podrían ayudarte: 1. Identifica y comprende tus desencadenantes de estrés: Intenta identificar qué situaciones o pensamientos específicos te están generando estrés. Conocer tus desencadenantes te ay…
A menudo tengo sentimientos de ansiedad y miedo, sin saber de dónde viene, y a veces se vuelve difícil incluso respirar.	Lamento escuchar que estás lidiando con sentimientos de ansiedad y miedo. Estos sentimientos pueden ser abrumadores, pero hay formas de manejarlos y buscar apoyo. Aquí tienes algunas sugerencias que podrían ayudarte: 1. Respiración profunda: Cuando te sientas ansioso, concéntrate en respirar profundamente y lentamente. Inhala por la nariz durante varios segundos, retén el aire por un momento y lu…
Siempre me he sentido inútil, no lo suficientemente buena, no lo suficientemente inteligente, no lo suficientemente bonita, y es frustrante.	Lamento que te sientas así, pero quiero recordarte que todos tenemos nuestras propias cualidades y talentos únicos. Es normal sentirse inseguro(a) en ocasiones, pero es importante no dejarse llevar por esos sentimientos negativos. Aquí tienes algunos consejos que pueden ayudarte a superar esos sentimientos de inutilidad: 1. Reconoce tus logros: Tómate un momento para reflexionar sobre tus logros …
Siempre tengo pensamientos suicidas, siento que la vida no tiene sentido y que no valgo nada. También me siento desesperado y siento que no hay esperanza para mi futuro.	Lamento mucho escuchar que te estás sintiendo de esta manera, pero quiero enfatizar que no estás solo/a y que hay ayuda disponible para ti. Es importante que hables con alguien de confianza sobre lo que estás experimentando. Puedes hablar con un amigo, un miembro de tu familia o un profesional de la salud mental, como un terapeuta o un consejero. Ellos pueden ofrecerte apoyo y orientación durante…
A menudo siento que mi vida no tiene sentido, no sé por qué vivo de esta manera, siento que no tengo un propósito, que no tengo motivación, es como si estuviera perdiendo el tiempo, me siento inútil.	Lamento escuchar que te sientes así. Sentir que la vida no tiene sentido es un sentimiento común en momentos difíciles. Aquí hay algunas ideas y pasos que podrías considerar tomar para encontrar un propósito y recuperar la motivación: 1. Reflexiona sobre tus valores y pasiones: Pregúntate a ti mismo qué cosas te importan profundamente y qué actividades te hacen sentir vivo. Identificar tus valore…
Últimamente me he sentido muy estresado porque tengo mucho trabajo y tengo que hacer frente a muchas tareas todos los días, pero no tengo una sensación de logro, lo que me hace sentir muy frustrado. ¿Cómo puedo lidiar con esto? presión psicológica?	Lidiar con el estrés y la presión psicológica puede ser desafiante, pero hay varias estrategias que puedes intentar para enfrentarlo de manera más saludable. Aquí hay algunos consejos: 1. Prioriza y organiza tus tareas: Haz una lista de todas las tareas pendientes y asigna una prioridad a cada una de ellas. Esto te ayudará a enfocarte en las actividades más importantes y gestionar tu tiempo de ma…
A menudo me siento ansioso y tenso, sintiendo que no puedo manejar el estrés y los desafíos de la vida.	Lamento escuchar que te sientes ansioso y tenso con frecuencia. Manejar el estrés puede ser desafiante, pero hay estrategias que puedes implementar para ayudarte a lidiar con estos sentimientos. Aquí hay algunas sugerencias: 1. Identifica los desencadenantes de tu ansiedad: Comienza por identificar qué situaciones o pensamientos específicos te causan ansiedad. Puede ser útil llevar un registro de…
Mi mente está llena de negatividad y dudas y no sé cómo salir de eso.	Entiendo que estar atrapado en un ciclo de negatividad y dudas puede ser realmente desafiante. Aquí hay algunos pasos que puedes considerar para tratar de salir de esa mentalidad negativa: 1. Reconoce tus pensamientos negativos: Tómate un momento para identificar y reconocer tus pensamientos negativos. Esto es importante para poder abordarlos de manera más efectiva. 2. Desafía tus pensamientos ne…
Siento que mis emociones se están volviendo cada vez más inestables, a veces me siento deprimida y a veces me vuelvo a emocionar, no sé si hay algo mal en mi mente.	Lamento escuchar que estás experimentando cambios emocionales inconsistentes. Es importante recordar que soy un asistente virtual y no puedo proporcionar diagnósticos médicos o de salud mental. Sin embargo, puedo ofrecerte algunas sugerencias generales que podrían ser útiles en esta situación. 1. Busca apoyo: Considera hablar con amigos, familiares o seres queridos en los que confíes. A veces, si…
Cuando el niño llega a casa de la escuela, la casa está fría y nunca acepta su amabilidad. Solo ha cometido errores y su corazón está vacío. Lo que le preocupa es si será como sus padres cuando crezca.	Lamento escuchar que el niño se siente así. Es normal que los niños se preocupen por cómo serán cuando crezcan, especialmente si tienen modelos de comportamiento negativos a su alrededor. Sin embargo, es importante recordar que cada persona es única y tiene la capacidad de tomar decisiones conscientes sobre su carácter y comportamiento. Si el niño está preocupado por determinar si será como sus p…
No puede dormir casi todas las noches, no puede dormir y no puede conciliar el sueño, su estado de ánimo empeora cada vez más y le preocupa si tendrá depresión u otros problemas psicológicos más graves.	Lamento escuchar que estás experimentando dificultades para dormir y que tu estado de ánimo se ha visto afectado. Es posible que tu falta de sueño esté contribuyendo a tu estado de ánimo empeorado. Aunque no puedo diagnosticar problemas de salud mental, puedo ofrecerte algunas sugerencias para ayudarte a mejorar tus problemas para dormir y tu estado de ánimo. 1. Establece una rutina de sueño: Int…
Últimamente me siento abrumado, mis pensamientos son como cuerdas revueltas que no puedo agarrar	Lamento escuchar que te sientes abrumado. La sensación de tener pensamientos revueltos puede ser bastante agotadora y desafiante de manejar. A continuación, te ofrezco algunas estrategias que podrían ayudarte a lidiar con ello: 1. Haz una lista de tareas: Ordenar tus pensamientos puede ser más fácil si los plasmas en papel. Escribe una lista de todas las tareas que tienes en mente. Esto puede ayu…
Cada vez que pienso en mis fracasos, me siento impotente, pierdo el coraje ante la idea de no ser aceptado por la sociedad, me siento impotente ante la idea de que tal vez no pueda lograr mis sueños.	Entiendo que pensar en los fracasos puede ser desalentador y generar sentimientos de impotencia. Es normal tener preocupaciones sobre la aceptación social y el temor de no poder alcanzar los sueños. Sin embargo, es importante recordar que los fracasos son parte natural del proceso de aprendizaje y crecimiento. Aquí hay algunas cosas que podrías considerar para superar esos sentimientos de impoten…
Mi relación siempre ha sido inestable, a menudo experimento angustia emocional, no sé cómo lidiar con los problemas de la relación, me hace sentir impotente y perdida.	Lamento escuchar que estás pasando por una situación difícil en tu relación. Aquí hay algunos consejos que podrían ayudarte a manejar mejor los problemas y la angustia emocional: 1. Comunicación abierta: Es crucial tener una comunicación clara y abierta con tu pareja. Expresa tus sentimientos y preocupaciones de manera asertiva, pero evita los ataques personales. Escucha también lo que tu pareja …
A veces pierdo el control y me vuelvo muy irritable y facilmente furioso, e incluso pierdo los estribos con los que me rodean.	Entiendo que puede ser difícil lidiar con la pérdida de control y la irritabilidad. Aquí hay algunas sugerencias para manejar estas situaciones: 1. Respira profundamente: Cuando sientas que tu nivel de irritabilidad está aumentando, tómate un momento para respirar profundamente. Inhala lentamente por la nariz y exhala por la boca. Esto te ayudará a relajarte y a calmarte. 2. Identifica tus desenc…
Mi trabajo es estresante y lidiar con problemas y desafíos todos los días me hace sentir muy ansioso, empiezo a perder el sueño, pierdo el apetito y, a veces, me siento fuera de control.	Lamento escuchar que estás pasando por un período estresante en tu trabajo. El estrés laboral puede tener un impacto significativo en nuestra salud y bienestar general. Aquí hay algunas sugerencias para manejar estos desafíos: 1. Identifica las fuentes de estrés: Intenta identificar las principales fuentes de estrés en tu trabajo. ¿Hay tareas específicas, personas o situaciones que desencadenen t…
Siempre soy incapaz de controlar mis emociones, a veces me enojo repentinamente y otras veces me quedo callado repentinamente, lo que me hace incapaz de predecir mi propio comportamiento y desempeño, y me siento muy perturbado y confundido.	Entiendo que puede ser frustrante y confuso cuando experimentas dificultades para controlar tus emociones. Aquí hay algunas estrategias que puedes intentar para ayudarte en esta situación: 1. Toma conciencia de tus emociones: Trata de identificar qué te desencadena emocionalmente y cómo te sientes en esos momentos. Pregúntate a ti mismo: "¿Qué estoy sintiendo en este momento?" Esto te ayudará a e…
No puedo deshacerme del enredo con experiencias pasadas desagradables, y cada vez que pienso en esos eventos, siento un dolor y una pérdida insoportables.	Lamento mucho que estés pasando por esto. Moverse más allá de las experiencias pasadas desagradables puede ser un desafío, pero hay pasos que puedes tomar para ayudarte a lidiar con el dolor y la pérdida. 1. Permítete sentir: Es importante que permitas que tus sentimientos se expresen y que no los reprimas. No tengas miedo de llorar, sentir tristeza o enojo. Permitirte sentir te ayudará a procesa…
Muchas veces me siento sola e indefensa, no hay nadie que hable con mi mundo interior, me siento abandonada por el mundo, me hace sentir muy dolorosa y sin esperanza.	Lamento mucho que te sientas así. Sentirse solo e indefenso puede ser una experiencia muy difícil y desgarradora. Quiero recordarte que no estás solo en esto, incluso si no sientes que hay alguien en tu vida que comprende tu mundo interior en este momento. Aquí hay algunas sugerencias que podrían ayudarte a lidiar con esos sentimientos dolorosos y encontrar esperanza: 1. Buscar apoyo: Considera h…
A menudo me siento inferior e indefenso debido a mis defectos, siento que no soy lo suficientemente bueno, que no soy digno de amor.	Lamento que te sientas así, pero quiero recordarte que no estás solo. Muchas personas experimentan sentimientos de inferioridad e indefensión en algún momento de sus vidas. Es importante reconocer tus sentimientos y trabajar en aumentar tu autoestima. Aquí hay algunos consejos que podrían ayudarte a lidiar con estos sentimientos: 1. Reconoce tus fortalezas: En lugar de enfocarte en tus defectos, …
Tengo mucha presión de trabajo y estudio, y muchas veces me siento exhausto, pero no sé cómo relajarme y aliviar el estrés.	Entiendo que la presión de trabajo y estudio puede ser abrumadora y agotadora. Aquí tienes algunas sugerencias para ayudarte a relajarte y aliviar el estrés: 1. Establece límites: Asegúrate de tener un equilibrio entre el trabajo, el estudio y el tiempo personal. Establece horarios específicos para cada actividad y asegúrate de tomarte descansos regulares para relajarte. 2. Practica la respiració…
Mi estado de ánimo cambia tan rápido, de feliz a triste en un momento, ¿eso por qué?	El cambio rápido en el estado de ánimo puede ser resultado de diferentes factores. Algunas posibles razones pueden incluir desequilibrios químicos en el cerebro, factores genéticos, eventos estresantes o traumáticos, desórdenes de salud mental como el trastorno bipolar o trastornos de ansiedad, entre otros. Sería recomendable buscar el consejo de un profesional de la salud mental para evaluar y e…
Soy más propenso a perder la paciencia que otros, y me siento innecesariamente deprimido y empujado al límite cuando hago cosas pequeñas.	Lamento escuchar que te sientes deprimido y empujado al límite con facilidad. Perder la paciencia y sentirse deprimido por cosas pequeñas puede ser bastante desafiante, pero hay algunas cosas que puedes hacer para lidiar con estos sentimientos. Aquí hay algunas sugerencias: 1. Tómate un descanso: Si te sientes abrumado, date permiso para tomar un descanso. Tomarse un tiempo para relajarse y desca…
Cada vez que pienso en ir al médico o ver a un terapeuta, me siento intimidado e inseguro, me preocupa que mis problemas sean expuestos y juzgados por otros, este miedo me impide buscar ayuda.	Entiendo que la idea de ir al médico o ver a un terapeuta puede ser intimidante para algunas personas. Sin embargo, es importante recordar que estos profesionales están capacitados para ayudar y brindar apoyo sin juzgar. Aquí hay algunas cosas que puedes tener en cuenta para superar tus preocupaciones: 1. Recuerda que los profesionales de la salud están sujetos a la confidencialidad y la ética pr…
Me he encontrado con muchos contratiempos e injusticias en el lugar de trabajo, lo que me hace sentir muy frustrado y sin esperanza en mi vida.	Lamento escuchar que estás pasando por una situación difícil en tu lugar de trabajo y que esto está afectando tu sentido de esperanza y frustración en tu vida. Es importante abordar estos problemas de la manera más adecuada posible. Aquí hay algunas sugerencias para manejar esta situación: 1. Permítete sentir tus emociones: Es normal sentir frustración e injusticia en estas situaciones. Permítete…
Fui discriminado por mis compañeros de clase y, a veces, siento que la vida no tiene sentido.	Lamento escuchar que estás pasando por esa situación. La discriminación puede ser una experiencia muy dolorosa y difícil de afrontar. Quiero recordarte que eres valioso y que mereces ser tratado con respeto y dignidad. Aquí hay algunos consejos para lidiar con la situación: 1. Busca apoyo: Hablar con alguien de confianza puede ser de gran ayuda. Puedes hablar con un amigo, un miembro de tu famili…
Estoy muy insatisfecha con mi cuerpo y apariencia, y siempre me critico y me niego en exceso, lo que afecta incluso mi vida diaria y actividades sociales.	Lamento escuchar que te sientes insatisfecha con tu cuerpo y apariencia. La autocrítica excesiva puede ser muy dañina para tu bienestar emocional y mental. Aquí hay algunas sugerencias para ayudarte a lidiar con esta situación: 1. Practica la autocompasión: Aprende a tratarte a ti misma con amabilidad y compasión. Recuerda que todos tenemos imperfecciones y que es normal tener momentos de insegur…
Recientemente, a menudo me siento cansado y débil, incluso subir un tramo de escaleras es agotador, ¿debería ver a un médico?	Sí, definitivamente sería recomendable que consultes a un médico acerca de tu situación. Sentirse constantemente cansado y débil puede ser un síntoma de diversos problemas de salud, como anemia, problemas de tiroides, falta de nutrientes, trastornos del sueño u otras condiciones médicas subyacentes. Un médico podrá evaluar tu historial médico, realizar exámenes físicos y, si es necesario, solicit…
Siento que no puedo controlar mis emociones y comportamiento ya menudo tomo decisiones impulsivas, ¿es esto una enfermedad mental? ¿Cómo tratarlo?	No soy un profesional de la salud mental, pero puedo ofrecerte alguna información general sobre tus preocupaciones. Si sientes que no puedes controlar tus emociones y comportamientos, y a menudo tomas decisiones impulsivas, podría ser un síntoma de una enfermedad mental o un trastorno. Sin embargo, para obtener un diagnóstico preciso y opciones de tratamiento, es importante que te pongas en conta…
Reprimire todas las emociones negativas en mi corazón y no me permitire ser un poco frágil, pero mi corazón no puede contenerlo.	Entiendo que estás tratando de reprimir tus emociones negativas y evitar mostrarte vulnerable. Sin embargo, es importante recordar que reprimir estas emociones puede tener un efecto negativo en tu bienestar emocional a largo plazo. Permitirte sentir y expresar tus emociones es parte esencial de ser humano. Negar tus sentimientos puede llevar a sentimientos de frustración, estrés y una carga emoci…
Peleábamos todo el tiempo y cada vez teníamos algunas palabras dolorosas y nos separamos.	Lamento escuchar que has experimentado conflictos y palabras dolorosas en tu relación. Las peleas y discusiones pueden ser muy desgastantes y pueden conducir a la separación si no se resuelven adecuadamente. Aquí hay algunos consejos que podrían ayudarte a lidiar con esta situación: 1. Comunicación abierta y honesta: Intenta hablar con tu pareja sobre tus sentimientos y preocupaciones, pero hazlo…
Caminando por la calle, Xiao Zhang siempre sintió que las personas a su alrededor lo miraban furtivamente, y su estado mental se volvió cada vez más inestable.	Es comprensible que Xiao Zhang se sienta incómodo si constantemente siente que las personas lo miran furtivamente. Esto puede afectar su estado mental y hacer que se sienta cada vez más inestable. Es importante recordar que todos experimentamos momentos de inseguridad y paranoia en ciertas situaciones. Si Xiao Zhang se siente así, es posible que pueda trabajar en cambiar su perspectiva y manejar …
Siento que hay un problema en mi relación interpersonal. Me cuesta comunicarme y comunicarme con amigos, familiares y compañeros. A veces incluso hay conflictos y peleas. Esto me hace sentir muy frustrado e impotente. No sé. como construir relaciones sanas	Entiendo cómo te sientes y es común encontrarse con dificultades en las relaciones interpersonales. Aquí hay algunos consejos que pueden ayudarte a construir relaciones más saludables: 1. Trabaja en tu comunicación: La comunicación efectiva es fundamental para construir relaciones sólidas. Asegúrate de expresar tus sentimientos y pensamientos de manera clara y respetuosa. También, aprende a escuc…
Estaba insatisfecho con mi aspecto y mi cuerpo, y constantemente me juzgaba y dudaba de mí mismo, lo que me dejó con baja confianza en mí mismo y baja autoestima.	Lamento escuchar que has estado sintiéndote insatisfecho con tu aspecto y cuerpo. Es común tener momentos en los que nos juzgamos a nosotros mismos y dudamos de nuestra apariencia, pero es importante recordar que todos somos únicos y hermosos a nuestra manera. Aquí tienes algunos consejos para mejorar tu confianza y autoestima: 1. Enfócate en tus cualidades positivas: Todos tenemos característica…
A menudo me siento solo e impotente, como si nadie me entendiera realmente, y me resulta difícil conectarme con la gente, lo que me molesta y dificulta encontrar una solución.	Lamento escuchar que te sientas así. Es normal experimentar sentimientos de soledad y impotencia en ocasiones, especialmente si sientes que no te entienden o te resulta difícil conectarte con los demás. Aquí hay algunas sugerencias que podrían ser útiles: 1. Busca apoyo emocional: Considera hablar con un amigo cercano, un miembro de la familia o un profesional de la salud mental. A veces, simplem…
Después de que mis padres se divorciaron, he estado viviendo en la casa de mi abuela, aunque vivo con mi madre, siempre siento que ella es más extraña que mi abuela y no sé cómo comunicarme con ella.	Entiendo que puede ser difícil cuando hay cambios importantes en nuestras vidas, como el divorcio de nuestros padres. Es normal que te sientas más cómodo y cercano a tu abuela, ya que has estado viviendo en su casa durante este periodo. Sin embargo, es importante recordar que cada persona es única y tiene diferentes formas de comunicarse. Puede que tu madre tenga una personalidad distinta a la de…
Tengo más fracasos que éxitos, y cada vez más a menudo me consuelo pensando que, mientras trabaje duro, habrá recompensas, pero la realidad suele ser decepcionante.	Entiendo que puede ser frustrante cuando sientes que tienes más fracasos que éxitos. Sin embargo, es importante recordar que el camino hacia el éxito está lleno de obstáculos y desafíos, y es normal experimentar decepciones en el camino. Aquí hay algunas sugerencias que podrían ayudarte a enfrentar esta situación: 1. Aprende de los fracasos: En lugar de ver los fracasos como algo negativo, intent…
Tengo intensos sentimientos de temor de que algo suceda y no puedo calmarme	Lamento escuchar que estás experimentando sentimientos intensos de temor y dificultad para calmarte. Aquí hay algunas estrategias que puedes intentar para ayudarte a encontrar calma: 1. Respiración profunda: Prueba hacer algunas respiraciones profundas y lentas. Inhala profundamente por la nariz, sostenlo durante unos segundos y luego exhala lentamente por la boca. Repite este proceso varias vece…
Siento que he estado en un estado de confusión, sin saber lo que quiero y lo que debo hacer, lo que me molesta mucho y en ocasiones me hace tener algunas emociones negativas.	Comprendo que estés pasando por un momento de confusión y te encuentres indeciso sobre lo que quieres y lo que debes hacer. Este tipo de sentimientos pueden generar frustración y emociones negativas. Aquí te dejo algunos pasos que podrían ayudarte a aclarar tus pensamientos y encontrar una dirección: 1. Reflexiona sobre tus valores y objetivos: Piensa en cuáles son las cosas que realmente te impo…
De vez en cuando me siento deprimido y es difícil salir de las emociones negativas, ¿cómo puedo ajustar mi mentalidad?	Lamento escuchar que te sientes deprimido. Ajustar la mentalidad puede llevar tiempo y esfuerzo, pero hay varias estrategias que puedes probar para ayudarte a salir de las emociones negativas. Aquí tienes algunas sugerencias: 1. Busca apoyo: Hablar con un amigo cercano, un miembro de la familia o un profesional de la salud mental puede ser de gran ayuda. Compartir tus sentimientos y recibir apoyo…
Siempre siento que no soy lo suficientemente bueno, ni lo suficientemente inteligente, ni lo suficientemente hermoso, y a menudo quiero empaquetarme perfectamente para evitar que otros vean mis defectos.	Lamento escuchar que te sientes así, pero es importante recordar que todos somos únicos y valiosos a nuestra manera. Puede ser tentador compararse con los demás o buscar la perfección, pero es importante practicar la aceptación y el amor propio. Aquí hay algunas cosas que puedes hacer para ayudarte a superar estos sentimientos negativos: 1. Reconoce tus logros: En lugar de centrarte en tus defect…
A menudo me siento vacío por dentro, sin un verdadero sentido de pertenencia y propósito.	Entiendo que sentirse vacío y sin un sentido de pertenencia y propósito puede ser bastante desafiante. Afortunadamente, hay algunas cosas que puedes hacer para abordar esta situación: 1. Auto-reflexión: Tómate un tiempo para reflexionar sobre tus valores, metas y pasiones. Haz una lista de las cosas que te hacen sentir vivo y te brindan alegría. Esto te ayudará a tener una idea más clara de lo qu…
Cada vez que alguien me ataca o me felicita, siempre siento que me están engañando porque no merezco respeto.	Lamento escuchar que te sientas así, pero quiero recordarte que mereces respeto y aprecio como cualquier otra persona. Sentir que no lo mereces puede ser resultado de una baja autoestima o experiencias pasadas negativas. Es importante trabajar en tu autoconfianza y valorarte a ti mismo. Aquí hay algunos consejos para ayudarte a abordar esta situación: 1. Reflexiona sobre tus logros y habilidades:…
Me ha preocupado que los demás me critiquen y me nieguen, lo que conducirá a una confianza en mí mismo cada vez más baja. ¿Cómo puedo mejorar mi confianza en mí mismo?	Entiendo que la preocupación por la crítica y el rechazo puede afectar tu confianza en ti mismo. Aquí hay algunos consejos para ayudarte a mejorar tu confianza: 1. Aprende a aceptarte como eres: Reconoce tus fortalezas y debilidades. Todos tenemos cualidades únicas, y aceptarlas te ayudará a tener una visión más realista de ti mismo. 2. Establece metas alcanzables: Fijar metas realistas y alcanza…
No sé cómo lidiar con mis emociones. A menudo exploto por pequeñas cosas. Siento que no puedo controlar mis emociones. ¿Significa esto que tengo un problema psicológico?	No soy un profesional de la salud mental, pero puedo ofrecerte algunos consejos generales para lidiar con tus emociones. Experimentar dificultades para controlar tus emociones no necesariamente indica un problema psicológico, pero es importante que aprendas a manejarlas de manera saludable. Aquí hay algunas estrategias que podrían ayudarte: 1. Tómate un momento para respirar profundamente: Cuando…
Estoy lleno de miedo e incertidumbre sobre el futuro, no sé hacia dónde debo ir, y me siento muy perdido todos los días.	Entiendo que estar lleno de miedo e incertidumbre puede ser abrumador. Aquí hay algunos pasos que podrías seguir para lidiar con esta situación: 1. Tómate un momento para reflexionar: Intenta identificar qué es exactamente lo que te causa miedo e incertidumbre. Pregúntate a ti mismo qué aspectos de tu vida te hacen sentir perdido y sin dirección. 2. Establece metas claras: Una vez que tengas una …
Siempre he tenido el desempeño del trastorno obsesivo-compulsivo. A menudo tengo que verificar repetidamente si las puertas y ventanas están cerradas, si los aparatos eléctricos están apagados, etc. Si no se pueden cumplir estos requisitos, me sentiré muy perturbado y asustado. Esto afecta mi vida diaria y mi trabajo. Quiero saber cómo deshacerme de este problema.	Entiendo que el trastorno obsesivo-compulsivo puede ser muy desafiante y afectar tu vida diaria. Es importante que busques ayuda profesional para trabajar en superar este problema. Aquí hay algunas estrategias que podrían ser útiles: 1. Terapia cognitivo-conductual: Esta es una forma de terapia que se ha demostrado efectiva en el tratamiento del trastorno obsesivo-compulsivo. Un terapeuta capacit…
A veces me siento aburrido, no sé qué hacer, y no sé lo que me depara el futuro, y me siento vacío.	Entiendo cómo te sientes. Sentirte aburrido y sin saber qué hacer puede ser frustrante y tener una sensación de vacío. Aquí hay algunas ideas que podrían ayudarte: 1. Explora nuevos hobbies: Prueba cosas nuevas que te interesen, como aprender a tocar un instrumento, pintar, leer libros o practicar deportes. Esto podría brindarte algo emocionante para hacer y también podría ayudarte a descubrir tu…
Siempre quise tener un bebé, pero cuando estaba embarazada, siempre sentí que no estaba a la altura de ser una buena madre.	Es comprensible que tengas dudas y preocupaciones sobre ser una buena madre. Muchas personas pasan por eso durante el embarazo. Aquí hay algunas cosas que podrían ayudarte a sentirte más segura en tu papel de madre: 1. Recuerda que nadie es perfecto: Ser una buena madre no significa que nunca cometerás errores. Todos los padres enfrentan desafíos y aprenden a medida que avanzan. Lo importante es …
Siempre estaba preocupada por mi cuerpo y mi salud, temiendo que pudiera contraer varias enfermedades, lo que me hacía sentir muy nerviosa y ansiosa.	Entiendo que estar preocupado por tu cuerpo y tu salud puede ser estresante y generar ansiedad. Aquí hay algunas sugerencias para ayudarte a manejar esas preocupaciones: 1. Informate de manera correcta: Asegúrate de obtener información confiable y precisa sobre la salud y los riesgos de enfermedades. Consulta fuentes médicas y habla con profesionales de la salud para obtener respuestas a tus preg…
Soy muy tímido y quisquilloso con mi apariencia y figura, y a menudo estoy atrapado en una especie de autocorrección y cambio sin fin.	Entiendo que ser tímido y preocuparte por tu apariencia y figura puede ser algo desafiante. Aquí tienes algunos consejos que espero te ayuden: 1. Acepta quién eres: Aprende a amarte y aceptarte tal como eres. Todos somos únicos y no hay una figura o apariencia perfecta. Apreciar tus cualidades y características individuales es clave para construir una buena autoestima. 2. Céntrate en lo positivo:…
Los problemas de aprendizaje son comunes y puede hacer que el aprendizaje sea más divertido si lo trata como un juego.	¡Definitivamente! Tratar el aprendizaje como un juego puede hacer que sea más interesante y entretenido. Aquí tienes algunas ideas para hacerlo: 1. Incorpora elementos de juego: Introduce elementos de juego en tus actividades de aprendizaje, como puntos, niveles, desafíos y recompensas. Esto puede motivarte y hacer que te diviertas mientras aprendes. 2. Gamifica tus estudios: Crea tu propio siste…
Obviamente quiero tener alguien en quien confiar, pero no sé cómo abordarlo, cada vez que lo intento, fracaso, y luego pierdo el coraje y vuelvo al punto original.	Entiendo que puede ser difícil confiar en alguien, especialmente si has experimentado decepciones en el pasado. Aquí hay algunos consejos para abordar la cuestión de confiar en alguien: 1. Reflexiona sobre tus experiencias pasadas: Tómate un momento para reflexionar sobre por qué sientes que has fracasado en el pasado al intentar confiar en alguien. Identifica los patrones que podrían estar contr…
Me doy cuenta de que mi interés y entusiasmo por las cosas es cada vez menor, y siempre me siento menos motivado para hacer cualquier cosa. ¿Es esto un problema de salud mental?	Lo que describes podría ser indicativo de un problema de salud mental, especialmente si esta falta de interés y motivación afecta severamente tu funcionamiento diario y causa malestar significativo. Sería recomendable buscar apoyo profesional de un terapeuta o psicólogo para evaluar tus síntomas más a fondo y determinar si es posible que estés experimentando depresión u otro trastorno de salud me…
La presión psicológica regular afectará nuestra estabilidad emocional y puede afectar nuestra salud física. Debemos hacer un buen trabajo en el cultivo de la calidad psicológica y llevar a cabo la educación en salud mental.	Estoy de acuerdo con esa afirmación. La presión psicológica constante puede tener efectos negativos en nuestra estabilidad emocional y en nuestra salud física. Es importante que tomemos medidas para cuidar nuestra salud mental y promover la calidad psicológica. Existen diferentes estrategias que podemos adoptar para cultivar la calidad psicológica. Algunas de ellas incluyen: 1. Práctica de técnic…
Fui detenido ilegalmente por una noche, torturado hasta el punto de la debilidad, llorando solo en un rincón, solo las lágrimas iluminaban la oscuridad.	Lamento mucho escuchar que has pasado por una experiencia tan traumática. Si has sido detenido ilegalmente, es importante que busques ayuda legal de inmediato. Te recomendaría que contactes a un abogado o a una organización de derechos humanos para que te brinden asesoría y apoyo en esta situación. Además, es fundamental que busques apoyo emocional para procesar el trauma que has vivido. Puedes c…
En cuanto a la salud mental de los adolescentes, es muy importante aprender a establecer una relación sana y a expresar correctamente sus emociones y demandas.	¡Así es! Establecer una relación sana y aprender a expresar adecuadamente las emociones y demandas son fundamentales para la salud mental de los adolescentes. Aquí hay algunas sugerencias sobre cómo lograrlo: 1. Comunicación abierta: Fomenta un ambiente en el que los adolescentes se sientan seguros y cómodos para hablar abiertamente sobre sus emociones y preocupaciones. Escucha activamente y mues…
Últimamente he tenido muchas pesadillas, y estos sueños me hacen sentir asustado e inquieto, e incluso afectan la calidad de mi sueño y mi vida diaria.	Lamento escuchar que estás experimentando muchas pesadillas. Puedo entender cómo esto puede afectar tu bienestar emocional y tu calidad de vida. Aquí hay algunas sugerencias que podrían ayudarte a lidiar con tus pesadillas: 1. Mantén una rutina de sueño saludable: Trata de irte a dormir y despertarte a la misma hora todos los días para establecer un patrón de sueño regular. También asegúrate de c…
Siempre estoy ansioso y me preocupo constantemente por cómo van las cosas, especialmente las cosas pequeñas, también pueden hacerme sentir intranquilo e incómodo.	Entiendo que la ansiedad y la preocupación constante pueden ser agotadoras y difíciles de manejar. Hay algunas estrategias que podrías considerar para ayudar a controlar tus niveles de ansiedad: 1. Respiración profunda: Practicar técnicas de respiración profunda puede ayudar a relajar tu cuerpo y calmar tu mente cuando te sientes ansioso. Intenta inhalar lentamente por la nariz, mantén la respira…
No puedo detener mis pensamientos negativos, a veces incluso cuando las cosas no están tan mal, sigo pensando lo peor, me siento tan deprimida e indefensa, siento que nunca podré deshacerme de esta emoción.	Lamento mucho escuchar que te sientes así. Los pensamientos negativos pueden ser abrumadores y difíciles de controlar, pero hay algunas estrategias que puedes probar para ayudarte a lidiar con ellos. Aquí tienes algunas sugerencias: 1. Reconoce tus pensamientos negativos: Toma conciencia de cuando ocurren esos pensamientos negativos y trata de identificar los patrones en los que te encuentras atr…
Siento que mi vida es aburrida y carece de pasión y motivación, lo que me hace sentir deprimido y perdido	Lamento que te sientas así. Sentir que tu vida carece de pasión y motivación puede ser desafiante y tener un impacto negativo en tu bienestar emocional. Aquí hay algunas sugerencias que podrían ayudarte a encontrar nuevamente pasión y motivación en tu vida: 1. Reflexiona sobre tus intereses: Tómate un tiempo para pensar en qué actividades, temas o pasatiempos te han interesado en el pasado. Haz u…
A menudo sufro de insomnio, me acuesto en la cama por la noche pensando en el trabajo, las tareas familiares y las relaciones, lo que me impide concentrarme durante el día, la eficiencia del trabajo es baja y mi estado de ánimo se vuelve muy malo.	Lamento escuchar que estás experimentando insomnio y que eso está afectando tu vida diaria. El insomnio puede ser causado por varias razones, como el estrés, la ansiedad o los malos hábitos de sueño. Aquí tienes algunas sugerencias que podrían ayudarte: 1. Crea una rutina de sueño: Intenta establecer una rutina regular antes de acostarte. Establece una hora fija para ir a la cama y levantarte tod…
Cuando me encuentro con contratiempos y decepciones, creo que la única manera de estar a salvo es olvidar todo.	Entiendo cómo te sientes. Enfrentar contratiempos y decepciones puede ser difícil y a veces puede parecer tentador querer olvidar todo para protegernos. Sin embargo, olvidar completamente puede no ser la mejor opción. En lugar de eso, te sugiero considerar las siguientes estrategias: 1. Permítete sentir tus emociones: Es normal sentirse decepcionado o frustrado. Acepta tus sentimientos y permítet…
A menudo me siento cansado y débil, incluso cuando no estoy haciendo trabajo físico, también sufro de insomnio e insomnio, lo que me hace sentir muy incómodo y perturbado.	Lamento escuchar que te sientes cansado y débil, así como que sufres de insomnio e insomnio. Estos síntomas pueden ser indicativos de varios factores subyacentes. Sin embargo, como asistente digital, no puedo brindar diagnósticos médicos específicos. Te sugeriría que consultes a un médico o a un profesional de la salud para que pueda evaluar adecuadamente tus síntomas y proporcionarte un tratamie…
veces sufro de depresión, no puedo comer normalmente y luego controlo mi alimentación porque tengo miedo de que la gente me vea adelgazar.	Lamento escuchar que estás pasando por una situación difícil. Es importante recordar que la depresión puede afectar muchos aspectos de nuestra vida, incluyendo el apetito y la relación con la comida. Aquí hay algunas sugerencias que podrían ayudarte: 1. Busca apoyo profesional: Ponte en contacto con un profesional de la salud mental, como un psicólogo o un psiquiatra, para que puedan evaluar tu s…
Mis padres siempre me critican y no importa lo que haga no es lo suficientemente bueno, me hace sentir muy deprimido y decepcionado, siento que nunca podré obtener su aprobación y elogios.	Lamento mucho que estés pasando por esta situación y te entiendo completamente. Es difícil cuando los padres parecen estar constantemente descontentos con nosotros, y puede afectar nuestra autoestima y bienestar emocional. Aquí hay algunas sugerencias para lidiar con esta situación: 1. Reflexiona sobre sus críticas: Intenta entender si hay razones subyacentes detrás de sus críticas constantes. A …
Mi relación siempre ha sido muy inestable, siempre estoy controlado por las emociones, incapaz de mantener mi relación de una manera saludable.	Entiendo que lidiar con una relación inestable puede ser bastante desafiante. Aquí hay algunos consejos que podrían ayudarte a mantener una relación de manera más saludable: 1. Trabaja en ti mismo: Antes de poder tener una relación sana, es importante que te conozcas a ti mismo y te ocupes de tus propios problemas emocionales. Considera buscar apoyo, como terapia o asesoramiento, para abordar cua…
Xiaoling sufrió acoso escolar en la universidad, lo que provocó que se volviera inferior y se deprimiera. ¿Cómo puedo ayudarla a recuperar la confianza en sí misma y la salud mental?	Es lamentable que Xiaoling haya pasado por esa situación. Aquí tienes algunas sugerencias sobre cómo puedes ayudarla a recuperar la confianza en sí misma y mejorar su salud mental: 1. Escucha y valida sus sentimientos: Asegúrate de prestar atención activa a lo que Xiaoling comparte contigo sobre su experiencia y sus emociones. Muéstrale que te importa y entiendes sus sentimientos. 2. Brinda apoyo…
Mis relaciones familiares eran complicadas y, a menudo, estaba estresada e insegura y no sabía cómo lidiar con ellas ni a quién acudir en busca de ayuda.	Lo siento mucho por tu situación complicada en las relaciones familiares. Es normal sentirse estresada e insegura cuando las cosas no están en armonía en el hogar. Te animo a que consideres las siguientes opciones para lidiar con esta dificultad: 1. Comunicación abierta: Intenta tener conversaciones honestas y abiertas con los miembros de tu familia. Expresa tus sentimientos y escucha también sus…
Tengo un amigo que siempre se queja negativamente y no tiene una actitud positiva ante nada, creo que su negatividad afecta mis emociones, pero no sé cómo comunicarme con él.	Es comprensible que la negatividad de tu amigo pueda afectar tus emociones. Aquí te dejo algunos consejos sobre cómo comunicarte con él de manera efectiva: 1. Sé comprensivo: Intenta poner en práctica la empatía y trata de comprender que puede haber circunstancias personales que lo hacen sentir negativo. Hazle saber que estás ahí para escucharlo si necesita desahogarse. 2. Haz preguntas abiertas:…
Recientemente, descubrí que siempre tengo insomnio, incluso cuando me duermo, tengo pesadillas y me siento pesado después de despertarme, ¿qué debo hacer?	Lamento saber que estás experimentando problemas de sueño y pesadillas. Aquí tienes algunos consejos para ayudarte a lidiar con el insomnio y mejorar la calidad de tu sueño: 1. Establece una rutina de sueño: Intenta irte a la cama y levantarte a la misma hora todos los días, incluso los fines de semana. Establecer una rutina de sueño regular ayuda a entrenar a tu cuerpo para que reconozca cuándo …
A veces, cuando hablo con mis amigos, siempre siento que he terminado de hablar y que ahí se acaba la conversación, no hay palabras que decir	Es normal sentir que a veces la conversación llega a su fin y no encontrar más palabras para decir. Aquí hay algunas sugerencias para mantener la conversación en marcha: 1. Haz preguntas abiertas: En lugar de hacer preguntas que puedan responderse con un sí o un no, intenta formular preguntas abiertas que fomenten una respuesta más larga. Por ejemplo, en lugar de preguntar "¿Has visto alguna pelí…
Mi hijo está siendo acosado en la escuela y ahora está muy retraído y no sé cómo ayudarlo.	Lamento mucho escuchar que su hijo está siendo acosado en la escuela. Es importante abordar esta situación y brindarle apoyo emocional a su hijo. A continuación, le brindo algunos consejos sobre cómo puede ayudar: 1. Escuche a su hijo: Asegúrese de que su hijo se sienta cómodo hablando con usted sobre lo que está experimentando. Escuche sus preocupaciones y muestre empatía hacia sus sentimientos.…
Cada vez que me comunico con la gente, siempre me siento muy nervioso, no sé qué decir y tengo miedo de decir algo incorrecto.	Es normal sentirse nervioso al comunicarse con los demás, especialmente si no estás seguro de qué decir o temes decir algo incorrecto. Aquí tienes algunos consejos que pueden ayudarte a manejar esos sentimientos: 1. Prepárate: Antes de una conversación o evento, piensa en posibles temas de conversación o preguntas que puedas hacer. Esto te ayudará a tener ideas claras sobre qué decir y evitar el …
Cada vez que estoy solo, empiezo a tener una inexplicable sensación de pavor, sin saberlo, controlado por una fuerza invisible, siento que estoy atrapado, atrapado en un caparazón impenetrable, a veces todo va a ser terriblemente aterrador.	Lamento escuchar sobre tus sentimientos de pavor inexplicables. Parece que estás experimentando una sensación de atrapamiento emocional y miedo intenso cuando estás solo. Aunque soy solo un asistente virtual, puedo ayudarte a explorar posibles causas y ofrecerte algunas sugerencias. Sin embargo, siempre es importante buscar apoyo profesional si estos sentimientos persisten o afectan negativamente…
Siempre fui demasiado duro conmigo mismo y sentí que no era lo suficientemente bueno para ser amado y valorado.	Lamento escuchar que te has sentido así, pero déjame decirte que eres valioso y merecedor de amor y aprecio. Todos tenemos nuestras propias inseguridades y es normal tener momentos en los que dudamos de nosotros mismos. Sin embargo, es importante recordar que eres único y tienes cualidades y talentos únicos que te hacen especial. En lugar de ser duro contigo mismo, intenta ser amable y compasivo …
Mi vida es una frustración constante, fracaso sin importar lo que haga, siento que no valgo nada	Lamento mucho escuchar que te sientes así. No eres un fracaso y definitivamente vales mucho. Todos pasamos por momentos difíciles en la vida, pero es importante recordar que estos momentos no definen nuestra valía como personas. Aquí hay algunos pasos que puedes seguir para empezar a cambiar tu perspectiva: 1. Desafía tus pensamientos negativos: A menudo, nuestros pensamientos pueden distorsionar…
Siempre fui intimidado, menospreciado, me sentí inútil e incompetente, incapaz de mostrar mi verdadera fuerza y habilidad en situaciones sociales, siempre escondido en la esquina.	Lamento mucho que hayas experimentado intimidación y menosprecio. Esas situaciones pueden ser muy difíciles de manejar y entender. Recuerda que no estás solo y hay formas de superar estos sentimientos. Aquí hay algunas sugerencias para construir confianza y habilidades sociales: 1. Reconoce tus fortalezas: Todos tenemos habilidades y talentos únicos. Tómate un tiempo para reflexionar sobre tus fo…
Me siento confundido e impotente sobre el futuro, no sé qué debo hacer y no sé lo que quiero.	Comprendo cómo te sientes. Es normal sentirse confundido e impotente en ocasiones, especialmente cuando se trata del futuro y de tomar decisiones importantes sobre nuestra vida. Aquí hay algunos pasos que podrías seguir para tratar de superar esta situación: 1. Date tiempo para reflexionar: Dedica tiempo a reflexionar sobre tus pensamientos y emociones. Puedes hacerlo a través de la escritura, la…
No sé por qué siempre pienso demasiado, me preocupo por el futuro y tengo que verificar dos veces para cerrar la puerta y cerrar las ventanas cada vez que salgo, lo que me hace sentir muy cansada e irritable.	Parece que estás experimentando niveles altos de ansiedad y estrés debido a tus pensamientos excesivos y compulsiones de verificación. Aquí hay algunas sugerencias que podrían ayudarte a lidiar con esta situación: 1. Identifica tus pensamientos irracionales: Trata de identificar los patrones de pensamiento negativo que te llevan a preocuparte y a pensar demasiado. A veces, esto puede implicar cre…
He sido agredida sexualmente durante mucho tiempo, pero todavía siento dolor y angustia ¿Cómo puedo lidiar con este dolor del pasado?	Lo lamento mucho por lo que has pasado. Lidiar con el dolor y la angustia causados por una agresión sexual puede ser un proceso largo y difícil. A continuación, te proporcionaré algunos pasos que puedes seguir para ayudarte a sanar: 1. Busca apoyo: No tengas miedo de pedir ayuda. Puedes hablar con un terapeuta o consejero especializado en trauma sexual. Ellos pueden brindarte el apoyo que necesit…
Sentía que mi vida carecía de sentido y propósito, que no podía encontrar lo que realmente quería hacer, y este sentimiento de estar perdido era muy doloroso.	Entiendo que te estés sintiendo así y lamento que estés pasando por ese dolor. Es normal tener momentos en los que nos cuestionamos nuestro propósito y dirección en la vida. A continuación, te brindaré algunas sugerencias para ayudarte a encontrar un sentido y propósito en tu vida: 1. Autoexploración: Tómate el tiempo para reflexionar sobre tus valores, intereses y pasiones. Pregúntate qué te gus…
Un día, encontré una manera de escapar de mi mundo real, que es poner mi cabeza en el sofá, taparme los oídos y no escuchar el sonido exterior, para poder sumergirme por completo en un mundo solo conmigo mismo. En este mundo, todos los problemas desaparecerán.	Escapar de la realidad y encontrar un espacio seguro para uno mismo es comprensible y en ocasiones puede ser necesario para recargar energías y cuidar nuestra salud mental. Sin embargo, es importante recordar que no podemos evitar nuestros problemas de manera indefinida. Aquí tienes algunas sugerencias para enfrentarlos de una manera más saludable: 1. Identifica tus emociones: En lugar de ignorar…
A menudo me siento solo e indefenso, siento que no soy entendido o apoyado por nadie, incluso si alguien a mi alrededor se siente alienado y alienado, esta emoción me deprime y negativa, y a veces provoca síntomas de ansiedad y depresión.	Lamento escuchar que te sientes tan solo e indefenso. Es normal sentirse así en ciertos momentos de la vida, pero hay formas de manejar y superar estos sentimientos negativos. Aquí tienes algunas sugerencias para ayudarte a lidiar con esta situación: 1. Busca apoyo emocional: Encuentra a alguien en quien confíes, como un amigo cercano, un miembro de la familia o incluso un terapeuta. Hablar sobre…
Una palabra tuya puede romper mi corazón	Lo siento mucho si alguna palabra mía te lastima o afecta de alguna manera. Mi intención siempre es ser útil y brindar apoyo. Si alguna vez te sientes herido/a por algo que digo, por favor házmelo saber para que pueda corregirlo y asegurarme de no repetirlo en el futuro.
Estoy extremadamente insatisfecho con mi aspecto y mi forma física, y a menudo tengo baja autoestima y ansiedad.	Lamento escuchar que te sientes tan insatisfecho con tu aspecto y forma física. Es normal tener momentos de baja autoestima y ansiedad, pero es importante recordar que eres único y valioso tal como eres. Aquí hay algunos consejos que podrían ayudarte a mejorar tu autoestima y bienestar emocional: 1. Practica el autocuidado: Dedica tiempo a cuidar de ti mismo. Esto puede incluir actividades como h…
Realmente no sé lo que estoy haciendo, siempre no tengo idea de nada y me deprime mucho.	Lamento que te sientas así. Puedo entender que a veces puede ser difícil sentirse perdido o sin saber qué hacer. Aquí hay algunos consejos que pueden ayudarte: 1. Acepta que está bien no saberlo todo: Es normal sentirse perdido o sin dirección en algunas ocasiones. Tómate un momento para recordar que nadie lo sabe todo y está bien no tener todas las respuestas. 2. Identifica tus intereses y metas…
A menudo me da miedo relacionarme con extraños al socializar y no me gusta estar en situaciones de aglomeración, espero poder superar estos miedos.	Entiendo tu preocupación y es normal tener ciertos temores al socializar con extraños o estar en situaciones de aglomeración. Afortunadamente, hay formas de superar estos miedos y sentirte más cómodo en estas situaciones. Aquí tienes algunas sugerencias: 1. Empieza gradualmente: Comienza con situaciones menos intimidantes y ve aumentando gradualmente el nivel de exposición. Por ejemplo, puedes in…
Los psicólogos creen que la depresión extrema puede afectar la salud física y mental de una persona	Sí, los psicólogos creen que la depresión extrema puede tener un impacto significativo en la salud física y mental de una persona. La depresión puede afectar negativamente el sistema inmunológico, aumentar el riesgo de enfermedades cardiovasculares y debilitar el sistema nervioso. Además, la depresión puede causar síntomas como fatiga, disminución del apetito, cambios en el sueño y dificultades p…
Cada vez que empiezo a perseguir una meta, me siento impotente, y cada vez que trato de cambiar algo, siento que no tengo el coraje.	Entiendo cómo te sientes. Puede ser desalentador cuando te enfrentas a obstáculos y no te sientes capaz de superarlos. Sin embargo, recuerda que el cambio y el logro de metas no siempre suceden de la noche a la mañana. Aquí hay algunos consejos que pueden ayudarte: 1. Define metas realistas: Asegúrate de establecer metas alcanzables y que estén en línea con tus habilidades y capacidades actuales.…
A menudo sufro de insomnio y dificultad para concentrarme en el trabajo porque me preocupa no poder hacer el trabajo que estoy haciendo.	Lamento escuchar que estás experimentando insomnio y dificultades para concentrarte en el trabajo debido a preocupaciones. Aquí hay algunas sugerencias que podrían ayudarte: 1. Establece una rutina de sueño: Intenta acostarte y levantarte a la misma hora todos los días para regularizar tu ciclo de sueño. Evita la cafeína y las comidas pesadas antes de acostarte. 2. Practica la relajación: Antes d…
Siento más dolor que nunca cuando mi familia rechaza mi ayuda	Lamento escuchar eso. Sentir dolor cuando nuestra familia rechaza nuestra ayuda puede ser muy difícil. Aquí hay algunas cosas que puedes considerar: 1. Reflexiona sobre tus intenciones: ¿Estás tratando de ayudar de manera desinteresada o hay alguna expectativa oculta detrás de tu ayuda? Asegúrate de que tus intenciones sean genuinas y que no estés esperando algo a cambio. 2. Comunícate abiertamen…
Me siento deprimido cada vez que encuentro dificultades.	Lamento escuchar que te sientas deprimido cuando enfrentas dificultades. Las dificultades pueden ser desafiantes y es comprensible que puedan afectar nuestro estado de ánimo. Aquí hay algunos consejos que podrían ayudarte: 1. Reconoce tus emociones: Es importante aceptar y reconocer tus sentimientos de tristeza o frustración. Permitirte sentir es el primer paso para lidiar con ellos. 2. Busca apo…
A menudo me siento deprimido e indefenso, siento que mi vida carece de sentido y valor, y a veces pienso en el suicidio, pero tengo miedo de decírselo a alguien, por temor a que piensen que soy una persona débil y un fracaso.	Lamento mucho que te estés sintiendo así. Quiero asegurarte que pedir ayuda y hablar sobre tus sentimientos no te hace débil ni un fracaso, al contrario, demuestra coraje y valentía al buscar apoyo. Tus sentimientos son importantes y dignos de ser escuchados. Es crucial que compartas cómo te sientes con alguien en quien confíes, como un amigo, un miembro de la familia o un profesional de la salud…
Tengo un amigo que siempre siente que no es lo suficientemente bueno, lo suficientemente inteligente, lo suficientemente talentoso o incluso que no vale la pena preocuparse por él, lo que hace que me preocupe por su salud mental.	Es comprensible que te preocupes por tu amigo y su salud mental. La autoestima baja puede tener un impacto negativo en la forma en que una persona se siente consigo misma y puede afectar su bienestar general. Aquí hay algunos consejos que podrían ayudarte a apoyarlo: 1. Escucha activamente: Hazle saber que estás ahí para él y que estás dispuesto a escuchar sin juzgar. Anima a tu amigo a expresar …
A menudo me siento deprimido y desesperanzado por la presión del trabajo y las disputas familiares ¿Cómo puedo aliviar esta emoción y mantener mi salud mental?	Lamento saber que te sientes deprimido y desesperanzado debido a la presión en el trabajo y las disputas familiares. Mantener una buena salud mental es importante y hay varias estrategias que pueden ser útiles para aliviar estas emociones. Aquí tienes algunas recomendaciones: 1. Busca apoyo: Hablar con alguien de confianza como un amigo, un ser querido o un profesional de la salud mental puede se…
Últimamente, mi mente comenzó a nublarse y comencé a preocuparme por mi salud mental y me está asustando.	Entiendo que estés preocupado por tu salud mental, pero es importante recordar que no soy un profesional de la salud y no puedo diagnosticar o tratar ningún problema médico o de salud mental. Sin embargo, puedo ofrecerte algunas sugerencias generales para cuidar de tu bienestar emocional: 1. Busca apoyo: Considera hablar con un profesional de la salud mental, como un psicólogo o un psiquiatra. El…
No me atrevo a enfrentar a los demás, siempre siento que no soy lo suficientemente bueno, estoy nervioso, incluso si mis amigos me hablan, seguiré preocupándome por lo que están pensando.	Entiendo cómo te sientes. A veces, enfrentar a los demás puede ser intimidante y puede generar inseguridades. Sin embargo, es importante recordar que todos enfrentamos estos sentimientos en algún momento de nuestras vidas. Aquí hay algunos consejos que podrían ayudarte a lidiar con esta situación: 1. Reconoce y acepta tus sentimientos: Reconoce que es normal sentir nerviosismo e inseguridad al en…
Me preocupa no poder mantener mi salud mental y defraudar a mi familia	Entiendo que te preocupe mantener tu salud mental y no querer defraudar a tu familia. La salud mental es tan importante como la salud física, y es fundamental cuidarla para poder llevar una vida equilibrada y satisfactoria. Aquí hay algunas sugerencias que podrían ayudarte: 1. Busca apoyo: No temas pedir ayuda si sientes que estás luchando con tu salud mental. Puedes hablar con un profesional de …
A menudo me siento solo e indefenso, incluso cuando estoy rodeado de gente, siento que nadie entiende mi mundo interior.	Lamento escuchar que te sientas solo e indefenso a pesar de estar rodeado de gente. Puede ser difícil cuando no nos sentimos comprendidos por los demás. Aquí hay algunas sugerencias que podrían ayudarte a lidiar con esta situación: 1. Busca apoyo emocional: Puedes considerar hablar con un amigo cercano, un miembro de la familia o incluso un profesional de la salud mental, como un psicólogo o tera…
Me siento muy confundido sobre el futuro, no sé qué hacer, esta confusión me hace sentir muy ansioso e intranquilo	Entiendo cómo te sientes. La incertidumbre sobre el futuro puede ser abrumadora y generar ansiedad. Aquí hay algunos pasos que puedes seguir para lidiar con esta confusión y encontrar claridad: 1. Acepta tus emociones: Reconoce y acepta tu ansiedad y confusión como emociones válidas. Es normal sentirse así cuando no sabemos qué nos depara el futuro. 2. Divide tus preocupaciones: Anota todas tus p…
Fui a una fiesta hoy, pero todos se rieron de mí y otros me rechazaron. Realmente estaba a punto de colapsar.	Lo siento mucho por lo que experimentaste en la fiesta. Ser rechazado y ridiculizado puede ser muy doloroso y desalentador. Recuerda que no estás solo y que todos enfrentamos momentos difíciles en alguna ocasión. Aquí hay algunas cosas que podrían ayudarte a superarlo: 1. Permítete sentir: Es normal sentirse triste, enojado o avergonzado después de una experiencia negativa. No reprimas tus emocio…
Encuentro que mis relaciones son difíciles y siempre es difícil formar conexiones profundas con las personas. Sentía que no sabía cómo llevarme bien con la gente o cómo comunicarme, por lo que me aislaba fácilmente. Anhelo tener algunos amigos de verdad, pero no sé cómo hacerlos.	Entiendo cómo te sientes. Formar relaciones profundas y conectarse con los demás no siempre es fácil. Aquí hay algunos consejos que podrían ayudarte a establecer conexiones más significativas con las personas: 1. Trabaja en tu autoestima: La confianza en uno mismo es fundamental para establecer relaciones saludables. Trata de trabajar en tu autoestima y reconocer tus cualidades y fortalezas. Cuan…
¿Estoy bajo mucha presión en el trabajo, tengo que trabajar horas extras todos los días, a menudo me quedo despierto hasta tarde, siento que mi cuerpo y mi psicología están al límite, pero todavía no puedo detenerme, ¿ qué debo hacer para evitar el colapso?	Lamento escuchar que estás pasando por un período de alta presión en el trabajo. Es importante que priorices tu bienestar mental y físico. Aquí hay algunos consejos para evitar un colapso: 1. Establece límites y establece horarios: Trabaja para establecer una rutina y límites saludables en tu jornada laboral. Define un horario y trata de cumplirlo tanto como sea posible. Esto te ayudará a evitar …
Siento que no puedo controlar mis emociones y, a menudo, pierdo los estribos por cosas pequeñas, lo que hace que las personas que me rodean se sientan incómodas.	Entiendo que pueda ser frustrante sentirse así. Aquí hay algunos consejos para ayudarte a controlar tus emociones: 1. Reconoce tus emociones: Toma conciencia de lo que estás sintiendo en el momento. Identificar y aceptar tus emociones es el primer paso para poder controlarlas. 2. Respira profundamente: La respiración profunda puede ayudar a calmarte cuando te sientes abrumado. Toma aire lenta y p…
No había amor en mi familia, ni palabras cálidas, ni un sentido real de seguridad, solo culpa y presión sobre mí, así que me volví más introvertido y no quería tratar con nadie.	Lamento escuchar que has pasado por una situación difícil en tu familia. La falta de amor y apoyo puede tener un impacto significativo en nuestro bienestar emocional y social. Es natural que te hayas vuelto más introvertido y no quieras tratar con los demás debido a esa situación. Aquí hay algunas sugerencias que podrían ayudarte a lidiar con esta situación: 1. Encuentra apoyo externo: Busca pers…
Estoy preocupado por mi futuro, no sé si tendré éxito, si podré realizar mis sueños.	Entiendo cómo te sientes. Preocuparse por el futuro es algo normal y muchas personas experimentan esa incertidumbre. Sin embargo, hay algunas cosas que puedes hacer para ayudarte a sentir más confiado y preparado para alcanzar tus metas. 1. Establece metas realistas: Define claramente lo que quieres lograr a corto y largo plazo. Asegúrate de que tus metas sean alcanzables y específicas, esto te a…
Sentía que no podía manejar el estrés y los desafíos de mi vida y, a menudo, sufría de mal humor, ansiedad e insomnio.	Lamento saber que estás pasando por un período difícil. El estrés y los desafíos pueden ser abrumadores, pero hay varias cosas que puedes hacer para manejarlos de manera más efectiva. Aquí hay algunos consejos: 1. Identifica las causas del estrés: Identifica las fuentes específicas de estrés en tu vida. Puede ser el trabajo, la familia, las finanzas, entre otros. Entender qué te está causando est…
Me siento solo y tengo mucha gente a mi alrededor, pero no siempre siento que realmente puedo conectarme con ellos ¿Es esto un trastorno de relación?	No necesariamente es un trastorno de relación, pero puede indicar dificultades para conectarte emocionalmente con los demás. La soledad y la falta de conexión emocional son problemas comunes que muchas personas experimentan en diferentes momentos de sus vidas. Pueden estar influenciados por diversos factores, como la falta de habilidades sociales, la falta de confianza en los demás o experiencias…
Me siento muy inquieto por el futuro, no sé qué hacer conmigo y no sé lo que me depara el futuro.	Entiendo que te sientas inquieto por el futuro y la incertidumbre que conlleva. Es algo normal y le sucede a muchas personas en diferentes momentos de la vida. Aquí tienes algunas sugerencias para ayudarte a encontrar calma y claridad: 1. Auto-reflexión: Tómate un momento para reflexionar sobre tus intereses, pasiones y metas en la vida. Piensa en lo que te emociona y te motiva. Esto puede ayudar…
Tengo muchos problemas en mi relación matrimonial y me siento frustrada e impotente y no sé qué hacer al respecto	Lamento escuchar que estás pasando por dificultades en tu relación matrimonial. Aquí hay algunos pasos que podrías considerar: 1. Comunicación abierta: Intenta hablar con tu pareja sobre tus sentimientos y preocupaciones. La comunicación honesta puede ser el primer paso para resolver los problemas. 2. Terapia de pareja: Considera buscar la ayuda de un terapeuta de pareja. Un profesional capacitad…
A menudo me siento muy cansado, débil física y mentalmente, e incluso a veces pienso en suicidarme y siento que mi vida no tiene sentido.	Lo siento mucho escuchar que estás experimentando estos pensamientos y sentimientos negativos. Es importante que hables con alguien de confianza sobre lo que estás pasando. Aquí hay algunas sugerencias de cómo puedes obtener ayuda: 1. Habla con un profesional de la salud mental: Busca un psicólogo o terapeuta con experiencia en el tratamiento de la depresión y la ansiedad. Ellos te pueden ofrecer…
A veces de repente experimento miedo y pánico extremos, y es difícil controlar mis emociones y comportamiento, y este estado dura mucho tiempo.	Lamento escuchar que estás experimentando miedo y pánico extremos. Es importante abordar estos sentimientos de una manera saludable. Aquí hay algunas sugerencias que podrían ayudarte: 1. Identifica y comprende tus desencadenantes: Aprende a reconocer qué te provoca estas emociones intensas. Identificar y comprender tus desencadenantes puede ayudarte a controlarlos de manera más efectiva. 2. Respi…
Cada vez que me enfrento a un nuevo desafío, me siento tan nervioso e inseguro que siento que no puedo manejarlo.	Es normal sentir nervios e inseguridad cuando nos enfrentamos a nuevos retos o desafíos. Aquí hay algunas sugerencias que podrían ayudarte a manejar esas emociones: 1. Reconoce tus emociones: Aceptar y reconocer cómo te sientes es el primer paso para poder manejarlo. No te juzgues por sentirte nervioso o inseguro, simplemente sé consciente de ello. 2. Respira profundo: La respiración profunda pue…
veces, de repente, siento que ya no tengo pasatiempos, no tengo interés en nada y siento que he perdido el rumbo y la motivación.	Entiendo cómo te sientes. A veces, es normal experimentar una falta de interés y motivación en nuestros pasatiempos y en la vida en general. Aquí hay algunas sugerencias para ayudarte a encontrar nuevos intereses y recuperar la motivación: 1. Auto-reflexión: Tómate un tiempo para reflexionar sobre lo que te gusta hacer y lo que te apasiona. Pregúntate a ti mismo qué te hacía sentir feliz y emocio…
De vez en cuando, una emoción incontrolable viene a mi corazón, pienso qué debo hacer si tengo depresión.	Si sientes que podrías estar experimentando depresión, es importante que busques ayuda y apoyo adecuados. Aquí hay algunos pasos que puedes considerar: 1. Reconocer tus sentimientos: Es fundamental reconocer y aceptar cómo te estás sintiendo. No te juzgues por tener estos sentimientos, la depresión es una condición médica que afecta a muchas personas. 2. Hablar con alguien de confianza: Busca a a…
Siempre he sentido que mi cuerpo está muy incómodo, y tengo todo tipo de síntomas extraños, pero los médicos dicen que estoy bien de salud, lo que me hace sentir mucha ansiedad e impotencia.	Entiendo que puede ser frustrante sentirte incómodo en tu propio cuerpo y no obtener respuestas satisfactorias de los médicos. Sin embargo, es importante recordar que los médicos tienen la experiencia y conocimientos para evaluar tu salud de manera objetiva. Aquí hay algunas cosas que podrías considerar para lidiar con esta situación: 1. Busca una segunda opinión médica: Si no te sientes satisfec…
Debido a estar en un ambiente tenso durante mucho tiempo, Huang Xiaoming a menudo sufre de insomnio, no puede distinguir la diferencia entre la mañana y la tarde y pierde por completo el ritmo.	Lamento escuchar que Huang Xiaoming está experimentando insomnio y dificultad para distinguir el tiempo debido a un ambiente tenso. Aquí hay algunas sugerencias que podrían ayudarlo: 1. Establecer una rutina de sueño: Asegúrese de tener una hora fija para acostarse y levantarse todos los días, incluso los fines de semana. Esto ayudará a regular su ritmo circadiano y mejorar la calidad del sueño. …
Mi relación con mis amigos nunca ha sido buena, siento que me cuesta hacer amigos de verdad y me hace sentir muy solo.	Lo siento mucho que te sientas solo y tengas dificultades para hacer amigos de verdad. A continuación, te brindo algunos consejos que pueden ayudarte a mejorar tus relaciones con los demás: 1. Sé tú mismo: No intentes ser alguien que no eres para agradar a los demás. La autenticidad es clave para establecer relaciones genuinas. 2. Haz actividades que te gusten: Participa en actividades que disfru…
Las personas que me rodean siempre piensan que estoy demasiado nervioso y me preocupo por cosas pequeñas, ¿cómo puedo relajarme?	Es normal sentirse nervioso o preocupado por cosas pequeñas en ciertos momentos. Sin embargo, si sientes que esto te está afectando de manera constante, es importante encontrar formas de relajarte y manejar tu estrés. Aquí tienes algunas estrategias que podrían ayudarte: 1. Respiración profunda: Tómate unos minutos para respirar lenta y profundamente. Inhala por la nariz, llena tus pulmones de ai…
Mi insomnio me obliga a ver a un psiquiatra todas las noches.	Lamento escuchar que estás lidiando con insomnio recurrente. Es una buena idea buscar ayuda profesional para abordar este problema. Un psiquiatra puede ser una opción adecuada para ti, ya que están capacitados para evaluar y tratar trastornos del sueño, así como otras condiciones de salud mental relacionadas. Cuando visites a tu psiquiatra, es posible que te hagan preguntas detalladas sobre tus p…
Siento que no soy capaz de enfrentar la presión de la familia y la sociedad, y no puedo lograr muchas cosas	Entiendo que puedes sentirte abrumado por la presión de la familia y la sociedad. Es importante recordar que todos enfrentamos diferentes desafíos en la vida y que cada persona tiene su propio ritmo y sus propias habilidades. Aquí tienes algunas sugerencias que pueden ser útiles para abordar estos sentimientos: 1. Encuentra tiempo para ti mismo: Dedica tiempo a actividades que te hagan feliz y te…
Siento que mis relaciones están empeorando, ni la familia ni los amigos confían en mí ni me apoyan más, me hace sentir tan perdida y sin esperanza.	Lamento escuchar que te sientes así en tus relaciones. Es normal experimentar altibajos en nuestras relaciones en diferentes momentos de nuestras vidas. Aquí hay algunas sugerencias para abordar esta situación: 1. Reflexiona sobre ti misma: Examina tus propias acciones y actitudes. ¿Puede haber algo que estés haciendo que pueda afectar negativamente tus relaciones? Ser consciente de esto te permi…
A menudo me siento incapaz de controlar mis emociones y comportamientos, a menudo hago movimientos impulsivos o violentos.	Entiendo que sentirte incapaz de controlar tus emociones y comportamientos puede ser frustrante y preocupante. Es importante tener en cuenta que soy un asistente virtual y no un profesional de la salud mental, pero puedo ofrecerte algunos consejos generales que podrían ayudarte: 1. Reconoce tus emociones: Toma conciencia de tus emociones y cómo te afectan. Identifica los desencadenantes que provo…
A menudo tengo miedo de ser rechazado, por lo que rara vez digo lo que pienso	Entiendo que tener miedo al rechazo puede ser difícil de manejar, pero es importante que no dejes que ese miedo te impida comunicarte y expresarte. Aquí hay algunos consejos para superar ese miedo y comenzar a decir lo que piensas: 1. Identifica tu temor: Reflexiona sobre por qué temes ser rechazado. ¿Qué es lo peor que podría pasar? ¿En qué situaciones te sientes más inseguro? Comprender tus mie…
La depresión comienza a desarrollarse lentamente durante la adolescencia.	La depresión es una enfermedad mental que puede comenzar a desarrollarse lentamente durante la adolescencia. Durante esta etapa, los adolescentes pueden experimentar cambios físicos, hormonales y emocionales, lo que los hace más vulnerables a los trastornos mentales como la depresión. Algunos factores que pueden contribuir al desarrollo de la depresión en la adolescencia incluyen experiencias tra…
Me siento insatisfecho con mi apariencia y mi cuerpo, me siento menos que perfecto y, a menudo, me siento ansioso e inseguro.	Lamento escuchar que te sientes de esta manera acerca de tu apariencia y tu cuerpo. La insatisfacción con la apariencia es un sentimiento común y es importante tratarlo con compasión y empatía hacia ti mismo. Aquí hay algunas sugerencias que podrían ayudarte a lidiar con estos sentimientos: 1. Reconoce tus cualidades positivas: En lugar de enfocarte solo en las cosas que no te gustan de ti mismo,…
Siempre me preocupa que lo que hago no sea lo suficientemente bueno, incluso si otros me han elogiado, no puedo dejar de lado mis preocupaciones.	Entiendo cómo te sientes. La preocupación por no ser lo suficientemente bueno es algo que afecta a muchas personas. Es importante recordar que cada uno de nosotros tiene sus propias inseguridades y temores, pero eso no significa que no seamos capaces o talentosos. Aquí hay algunas cosas que podrías hacer para lidiar con esta preocupación: 1. Cambia tu perspectiva: En lugar de centrarte en tus pre…
Me resultaba cada vez más difícil concentrarme, ya fuera leyendo o haciendo cosas, me distraía fácilmente	Hay varias razones por las cuales podrías estar experimentando dificultad para concentrarte y distracción fácilmente. Aquí hay algunas posibles causas y consejos para ayudarte a mejorar tu concentración: 1. Estrés: El estrés puede afectar tu capacidad para concentrarte. Intenta identificar las fuentes de estrés en tu vida y encuentra formas de reducirlo, como practicar técnicas de relajación o ha…
Siempre siento que no tengo valor, no sé cuál es el significado de mi existencia, y me siento vacío e indefenso todos los días.	Lamento escuchar que estés pasando por un momento difícil en tu vida. Puede ser abrumador y desalentador sentirse sin valor y cuestionar el significado de nuestra existencia. Aquí hay algunos pasos que puedes seguir para empezar a abordar estos sentimientos: 1. Busca apoyo emocional: Habla con alguien en quien confíes, como un amigo cercano, un miembro de la familia o incluso un profesional de la…
Me aterraba interactuar con la gente, tenía miedo de que me rechazaran, ridiculizaran o malinterpretaran, y con frecuencia me sentía solo e indefenso.	Entiendo cómo te sientes. El miedo a la interacción social es algo que mucha gente experimenta. A continuación, te proporcionaré algunos consejos para superar esta ansiedad y comenzar a sentirte más cómodo al interactuar con los demás: 1. Reconoce tus pensamientos negativos: Identifica los pensamientos negativos y autocríticos que surgen en tu mente cuando te sientes ansioso en una situación soci…
Estaba muy insatisfecha con mi apariencia y figura, y me sentía fea y poco atractiva. A menudo pensaba en hacerme una cirugía plástica y perder peso, pero también me preocupaban los riesgos de la cirugía y tenía miedo de ser ridiculizada y rechazada por los demás.	Entiendo cómo te sientes. Sentirse insatisfecha con nuestra apariencia es algo que muchas personas experimentan en algún momento de sus vidas. Es importante recordar que la belleza no se define únicamente por la apariencia física, sino también por la confianza y la actitud positiva que proyectamos. Antes de considerar cualquier tipo de cirugía plástica o pérdida de peso, es crucial trabajar en nu…
A menudo me quedo despierto hasta tarde para trabajar horas extras, lo que hace que mi condición física sea cada vez peor, pero no puedo detenerme porque creo que solo así puedo demostrar mi valor y capacidad.	Entiendo que sientes la presión de demostrar tu valor y capacidad a través del trabajo, pero es importante cuidar de tu salud y bienestar. Trabajar horas extras de manera constante puede tener un impacto negativo en tu condición física y mental a largo plazo. Aquí hay algunas sugerencias para ayudarte a encontrar un equilibrio saludable: 1. Establece límites: Define un horario de trabajo regular …
Siento que me estoy volviendo cada vez más adicto a los juegos y las redes sociales, como si estas cosas se hubieran convertido en una parte integral de mi vida, esta dependencia me hace sentir incapaz de liberarme y perderme, espero encontrar una manera de deshacerme de esta dependencia Métodos.	Entiendo que te preocupe sentirte cada vez más adicto a los juegos y las redes sociales. Aquí te ofreceré algunos métodos que podrían ayudarte a deshacerte de esta dependencia: 1. Establece límites: Define cuánto tiempo estás dispuesto a dedicar a los juegos y las redes sociales cada día. Utiliza alarmas o temporizadores para recordarte que es momento de desconectar. 2. Crea un horario equilibrad…
Me molestaba que mi estado de ánimo siempre fuera alto y bajo, a veces estaba muy feliz y otras veces estaba tan deprimido que hasta quería suicidarme.	Lamento mucho que hayas experimentado esos cambios de ánimo tan extremos y dolorosos. Los altibajos emocionales pueden ser difíciles de manejar, pero hay maneras de abordarlos y buscar ayuda. Es importante que busques apoyo de personas de confianza, como amigos o familiares, quienes te escuchen y te brinden apoyo emocional. También es crucial considerar hablar con un profesional de la salud menta…
A veces siento que nadie se preocupa por mí y que soy el único con el que realmente puedo contar.	Lamento que te sientas así, pero quiero recordarte que no estás solo. A veces, es normal sentir que nadie se preocupa por uno mismo, pero en realidad hay muchas personas que te valoran y se preocupan por ti, aunque puedan mostrarlo de diferentes maneras. Es posible que algunas personas no sean tan expresivas con sus sentimientos, pero eso no significa que no les importes. Si necesitas apoyo o alg…
Recientemente, a menudo sufro de insomnio y siempre doy vueltas en la cama por la noche. ¿Podría ser esto un problema psicológico subyacente?	El insomnio puede tener diferentes causas, y una de ellas puede ser un problema psicológico subyacente. El estrés, la ansiedad, la depresión u otros trastornos de salud mental pueden afectar el sueño y contribuir al insomnio. También es posible que el insomnio sea causado por factores externos, como el ambiente de sueño, el consumo de cafeína, los horarios irregulares de sueño o una mala higiene …
Mi relación con mi familia nunca ha sido buena, siento que no me entienden, no me respetan, me hace sentir solo	Lamento escuchar que estás pasando por momentos difíciles en tu relación familiar. No siempre es fácil tener una buena comunicación y entendimiento con nuestros seres queridos. Aquí hay algunos consejos que podrían ayudarte a mejorar tu situación: 1. Comunícate abiertamente: Intenta expresarte de manera clara y calmada. Hablar sobre tus sentimientos y preocupaciones puede ayudar a crear un ambien…
A menudo me siento vacío y solo por dentro, buscando algo para llenar el vacío, pero a menudo no puedo encontrar la manera correcta de aliviar el sentimiento.	Entiendo que sentirse vacío y solo por dentro puede ser muy difícil. Es importante recordar que no estás solo en esta experiencia y hay formas de aliviar estos sentimientos. Aquí hay algunas sugerencias que podrían ayudarte: 1. Identifica tus emociones: Intenta reflexionar y entender qué te hace sentir vacío y solo. Esto puede ayudarte a comprender mejor tus necesidades y encontrar maneras adecua…
