# Supplementary material
Source: ML conference proceedings conference paper supplement (https://openreview.net/forum?id=JL42j1BL5h)
Supplement: supplementary_material [file Mental_Health_gpt.xlsx]

## Sheet: Sheet1
Input	Output
मैं अक्सर अकेला और असहाय महसूस करता हूं। कोई मुझे समझ नहीं पा रहा है. मैं बिना किसी मूल्य या अर्थ के एक हारे हुए व्यक्ति की तरह भी महसूस करता हूं। यह भावना मुझे बहुत उदास और निराश कर देती है। मैं नहीं जानता कि इनसे कैसे छुटकारा पाया जाए।	मुझे खेद है कि आप ऐसा महसूस कर रहे हैं। अकेलेपन और असहायता की भावना को समझना कठिन हो सकता है लेकिन इस समस्या को हल करने के लिए कुछ कदम उठाये जा सकते हैं। 1. सहायता मांगें: आपकी मदद करने के लिए किसी ऐसे व्यक्ति के पास जाएं, जिसे आप विश्वास करते हैं और जो आपकी मदद करने को तत्पर हो सकता है। ईमानदारी से अपनी भावनाओं को साझा करें और उनकी सहायता लें। 2. सामाजिक समूह में शामिल हों: अकेलेपन के बीच आपके आ…
यहां तक ​​कि अगर मैं सिर्फ चिप्स का एक बैग खरीदने जा रहा हूं, तो मुझे चिंता है कि लोग सोचेंगे कि मैं बहुत अधिक खा रहा हूं, यह आत्म-पराजय वाला व्यवहार है।	आपकी चिंता समझना स्वाभाविक है। हालांकि, यह महत्वपूर्ण है कि आप बाइस और अपने प्रतिष्ठान पर ध्यान केंद्रित करें, और दूसरों की सोच के बारे में बारीकी से सोचे। अक्सर लोग अपने बाइस पैकेट के साथ उपभोग करते हैं और आपके पैकेट के आकार या उपयोग में कितनी भी अंतर होने पर अहमियत नहीं रखते हैं। ध्यान दें कि आप अपनी खुशी और आनंद के लिए चिप्स खरीद रहे हैं, और अंततः यह आपके व्यक्तित्व पर असर नहीं डालेगा। अपने खा…
मैं हमेशा थका हुआ और शक्तिहीन महसूस कर रहा था, अपने कार्यों पर ध्यान केंद्रित करने में असमर्थ था या उन चीजों पर भी काम नहीं कर पा रहा था जिनमें मेरी रुचि थी, जिससे मैं बहुत निराश हो गया था।	यह कई कारणों से हो सकता है, जैसे थकान, तनाव, निराशा या मानसिकता की समस्या। इस समस्या को हल करने के लिए कुछ सुझाव हैं: 1. एक स्वस्थ जीवनशैली बनाएं: अपने आहार, निद्रा और व्यायाम का ध्यान रखें। यह आपकी शारीरिक और मानसिक स्थिति को सुधारने में मदद करेगा। 2. ध्यान दें: ध्यान योग और मेडिटेशन प्राणायाम करने से मन को शांति मिलती है और तनाव और थकान का समाधान होता है। 3. छोटे ध्यान के विभाजन करें: बड़े-बड़े क…
हाल ही में, मैं अच्छी तरह से सो नहीं पा रहा हूं, या जब मैं सोता हूं तो मुझे बुरे सपने आते हैं, और जब मैं उठता हूं तो मुझे बहुत थकान और थकान महसूस होती है।	ऐसी स्थिति में, आप थका होना और अच्छी नींद के बारे में चिंतित हो सकते हैं। कुछ सुझाव शामिल हैं: 1. दिनभर के दौरान अधिक प्रयास न करें ताकि रात्रि में आपको थकान कम हो। 2. सोने से पहले रहस्यमय स्थानों, जैसे फोन और कंप्यूटर के बारे में सोचना कम करें। 3. सोने से पहले आरामदायक गतिविधियाँ करें, जैसे कि गहरी साँस लेना, मसाज करना, योग, या मन को शांत करने का कोई अभ्यास करना। 4. अपने बिस्तर और नींद वाले क्षे…
हर बार जब मैं डॉक्टर के पास जाता हूं, तो कोई सुधार नहीं होता है, और मेरा मूड खराब हो जाता है, और मैं अक्सर आत्म-दया और आत्म-दया में पड़ जाता हूं	यह आपके लिए अच्छा नहीं हो रहा है कि आप हर बार जब डॉक्टर के पास जाते हैं तो आपका मूड खराब हो जाता है और आप आत्म-दया महसूस करते हैं। मेरी सलाह है कि आप अपनी तकलीफ़ को अपने डॉक्टर से साझा करें और उन्हें आपकी परेशानी और मूड के बारे में बताएं। शायद वे आपकी समस्या को समझ सकें और आपकी मदद कर सकें। यदि आपका डॉक्टर आपकी समस्या को ध्यान में नहीं लेते हैं या अवश्यक सुधार नहीं करते हैं, तो अन्य डॉक्टर से मतभ…
मैं हमेशा भीड़ में भी अलग-थलग और बहिष्कृत महसूस करता था।	अपनी मनोदशा में संतुलन बनाए रखना महत्वपूर्ण होता है। यदि आप भीड़ में खुद को अलग-थलग और बहिष्कृत महसूस करते हैं, तो कुछ निम्नलिखित सुझाव आपकी सहायता कर सकते हैं: 1. ध्यान केंद्रित करें: भीड़ में रहने के बीच शांति भी प्राप्त करने के लिए, आप अपना ध्यान केंद्रित कर सकते हैं। यहां रहने और बहिष्कृत महसूस करने के बजाय, आप खुद को प्रासंगिक मामलों पर ध्यान केंद्रित करके दिमाग को शांत कर सकते हैं। 2. सामरि…
अपने आप को खेलों का आदी होने दें, या इंटरनेट एक अदृश्य मनोवैज्ञानिक दबाव है	मनोवैज्ञानिक दबाव, इंटरनेट और अन्य सामग्री का यूज़ करना एक मेनसिटी बन सकता है, लेकिन इंटरनेट का सही तरीके से उपयोग करने से यह एक बहुत सकारात्मक और शिक्षाप्रद साधन बन सकता है। प्रतिबंधी वक्तव्याचार, आनलॉग क्षेत्र में और वैज्ञानिक अभ्यास में इंटरनेट के लाभों का उपयोग कर सकते हैं। खेल सामग्री का सबकचाहते हैं, इसलिए उचित ब्रेक लेना और उपयुक्त समय पर बंद करना महत्वपूर्ण होता है। संतुलित रहें और अपने अ…
मैं हाल ही में बहुत अधिक दबाव में रहा हूँ, मैं हर दिन बहुत चिंतित महसूस करता हूँ, मुझे अच्छी नींद नहीं आती है, मुझे सिरदर्द है, मेरा दिल तेजी से धड़कता है, और मुझे लगता है कि मैं किसी भी समय गिरने वाला हूँ	यह सब लक्षण अत्यधिक तनाव की स्थिति का संकेत हो सकते हैं। अधिक स्ट्रेस और चिंता शारीरिक और मानसिक स्वास्थ्य पर बुरा प्रभाव डाल सकते हैं। यदि आपको यह सब अनुभव हो रहा है, तो मैं आपको निम्न उपाय सुझा सकता हूँ: 1. अवकाश लें: दिनभर के सटीक समय को अपने लिए सिर्फ आराम और आत्मसात करने के लिए निकालें। इससे आपके मानसिक स्थिति पर सकारात्मक प्रभाव पड़ेगा। 2. योग और मेडिटेशन: ध्यान, प्राणायाम और योग आपके तनाव क…
हर बार जब मैं कठिनाइयों और असफलताओं का सामना करता हूँ, तो मैं हमेशा आत्मविश्वास और प्रेरणा खो देता हूँ और महसूस करता हूँ कि मैं इसे संभाल नहीं सकता	दुःखद है कि आप कठिन समयों में अपना आत्मविश्वास और प्रेरणा खो देते हैं। लेकिन बेहतर तरीके हांथ पर खड़े होने के लिए आप महसूस करने के बजाय, इसे संभालने के लिए कुछ कदम उठा सकते हैं। यहाँ कुछ सामान्य सुझाव हैं: 1. सकारात्मक विचार व प्रभाव: कठिनाइयों के सामने, अपने मन में सकारात्मक विचार पोषित करें और अपने आप पर प्रभाव डालने का प्रयास करें। इसके लिए, सकारात्मक अवानों, विचारधाराओं और दृष्टिकोण के साथ अप…
मुझे हमेशा चिंता रहती है कि मैं जो कर रहा हूं वह अच्छा नहीं है और मुझे ऐसा लगता है कि दूसरे लोग लगातार मेरा मूल्यांकन कर रहे हैं और यह निराशाजनक है।	यह सामान्य है कि हमें कभी-कभी ऐसा लगता है कि हमारी कार्यक्षमता पर लोगों के प्रतिक्रियाओं और मूल्यांकन की आवश्यकता है। इससे निपटने के लिए कुछ सुझाव निम्नलिखित हो सकते हैं: 1. स्वयं विश्लेषण करें: ध्यान दें कि आपकी कार्यक्षमता का मूल्यांकन केवल आपके अपने मानक और मान्यताओं पर केन्द्रित होना चाहिए। आप अपने क्षमताओं, योग्यता और उपलब्धियों का समायोजन करके अपने आप को एक निर्माणशील और सकारात्मक तरीके से …
मैं हमेशा इस बारे में चिंतित रहता था कि क्या मैं सब कुछ ठीक कर रहा हूं, और इस बात से डरता था कि दूसरे लोग मेरे बारे में क्या सोचेंगे या मेरी आलोचना करेंगे, और इसके परिणामस्वरूप मैं अक्सर दर्दनाक आत्म-संदेह में डूब जाता था।	यह एक आम समस्या हो सकती है और आप इसे ठीक करने के लिए कुछ कदम उठा सकते हैं। यहां कुछ उपाय हैं जो आपके लिए मददगार साबित हो सकते हैं: 1. अपनी खुद की मूल्य और सम्मान को स्थापित करें: अपने आप को महत्वपूर्ण मानना शुरू करें और अपने योग्यता, सामर्थ्य और सौंदर्य की प्रशंसा करें। कृतज्ञता का भाव रखें और अपने अच्छे कार्यों को पहचानें। 2. स्वास्थ्य और सुख की देखभाल करें: दिमाग और शरीर की देखभाल करने के लिए स…
मैं अपने विचारों को अपने दिल में रखता हूं, मुझे हमेशा लगता है कि मैं फट जाऊंगा, और मैं दूसरों की नजरों से नहीं छिप सकता	यह सामान्य है कि हमें अपने विचारों को अपने दिल में रखने की आवश्यकता होती है, लेकिन कभी-कभी हमें अपने विचारों को साझा करने की जरूरत भी हो सकती है। यह मानसिक स्वास्थ्य के लिए महत्वपूर्ण हो सकता है क्योंकि इससे हमें दूसरों से सहयोग मिल सकता है और हमारी बातों को समझा जा सकता है। लेकिन इसके बावजूद, हमें अपने विचारों के साथ सामर्थ्य स्थापित करने की आवश्यकता होती है और खुद को मजबूत बनाने के लिए स्वयं पर…
मेरे परिवार को अचानक एक दुर्घटना का सामना करना पड़ा, मेरे माता-पिता दोनों गंभीर रूप से घायल हो गए, जिससे मैं असहाय और उदास महसूस करने लगा, और यहाँ तक कि डिप्रेशन के लक्षण भी विकसित हो गए।	मैं वास्तव में दुखी हूँ कि आप और आपके परिवार को इस दुर्घटना का सामना करना पड़ रहा है। इस स्थिति में, यह महत्वपूर्ण है कि आप अपनी मानसिक स्वास्थ्य का ख्याल रखें। यहां कुछ सुझाव हैं जो आपके लिए मददगार साबित हो सकते हैं: 1. अपने आपको अवकाश दें: इस दर्दभरे समय में, आपको सामान्य जीवन के दशकों से दूर ले जाने की आवश्यकता हो सकती है। इसके लिए, कुछ समय केवल अपने आप को ध्यान देने के लिए निकालें। 2. सहायता …
मैंने खुद को लोगों के साथ कम आराम दे पाया, हमेशा अकेले रहना पसंद करता था, सामाजिकता या दूसरों के साथ अपने जिंदगी को साझा करने में कोई दिलचस्पी नहीं थी, इस अकेलेपन ने मुझे बहुत उदास महसूस कराया	अकेलापन का अनुभव करना किसी लोगों के लिए स्वाभाविक हो सकता है, लेकिन यह आपको उदास या तंग करने की वजह नहीं होनी चाहिए. हर व्यक्ति का अदाप्तिव रहता है और उनके अपने तरीके होते हैं आपकी इच्छा में काम करने की क्षमता की वजह से, आप संभावित रूप से सामाजिक माहौल में आराम और समीक्षा में वृद्धि करने के लिए नए और रुचिकर कार्यक्रमों को खोंज सकते हैं। इसके साथ ही, अपने साथी और परिवार के साथ भी बातचीत करने और सह…
मुझे नियंत्रित करने की तीव्र इच्छा है और मैं हमेशा अपने हाथों में सब कुछ नियंत्रित करना चाहता हूं, और दूसरों को हस्तक्षेप या दखल देने की अनुमति नहीं देता, जिससे पारस्परिक संबंध टूट जाते हैं	यह अच्छी बात है कि आपके पास नियंत्रित करने की तीव्र इच्छा है और इसमें कोई दूसरों की हस्तक्षेप या दखल देने की अनुमति नहीं है। यह आपके पारस्परिक संबंधों को स्थिर और निश्चित बनाए रखने में मदद कर सकता है। यहां कुछ सुझाव हैं जो आपकी इच्छा को पूरा करने में मदद कर सकते हैं: 1. अपनी इच्छाओं और सीमाओं को स्पष्ट करें: दूसरों को सीमा के बारे में सचेत करने के लिए अपनी इच्छाओं और नियमों को स्पष्ट करें। यह आपक…
मुझे अक्सर लगता है कि मेरा दिमाग बहुत अराजक है, जैसे कि एक ही समय में मेरे दिमाग में बहुत सारे विचार और आवाजें चल रही हों, जिससे मैं बहुत भ्रमित और खोया हुआ महसूस कर रहा हूं	यह एक सामान्य समस्या हो सकती है जो कई लोगों को प्रभावित करती है। एक जटिल मानसिकता या अधिक प्रतिस्पर्धा के कारण दिमाग में अनुप्रयोगशील विचार और इमेजेस सक्रिय हो सकते हैं। इसके बावजूद, आप कुछ साधारण उपायों का प्रयास कर सकते हैं जो इस समस्या को कम करने में मदद कर सकते हैं: 1. ध्यान दें कि आपके विचार और ध्यान के बिंदु कहां हैं। दिनभर में, ध्यान केंद्रित करें और इसे एक चीज़ पर समर्पित करें। इसे ध्यान …
मैं जो कुछ भी करता हूं उसके लिए मेरे परिवार द्वारा मेरी आलोचना क्यों की जाती है	यह बहुत सामान्य है कि हमारे परिवार द्वारा हमारे कार्यों की आलोचना होती है। इसमें कई कारण हो सकते हैं, जैसे कि उनकी चिंता या चाहत कि हम सफल हों, उनके अपेक्षाएं या मान्यताएं, अनुभव जो हो सकता है, और अन्य अंश। अपने परिवार के सदस्यों के साथ यह वार्तालाप करने का प्रयास करें, उनकी सोच और आपके कार्यों के पीछे की वजहों को समझने का प्रयास करें। यह आपके बीच बातचीत में स्पष्टीकरण और समझौते के लिए मदद कर सकत…
हाल ही में, मैं हमेशा थका हुआ महसूस करता हूं और हर दिन कोई ऊर्जा नहीं होती, यहां तक कि लंबे समय तक सोने के बाद भी यह बेहतर नहीं होता	इसके कई कारण हो सकते हैं, जैसे कि ठीक से पूरे नींद न आना, अप्राप्त पोषणाहार, अनुक्रमिक दिनचर्या, मानसिक तनाव, या किसी बीमारी की वजह से. आपको अपनी दिनचर्या में कुछ बदलाव करके अपने ऊर्जा स्तर को बढ़ाने का प्रयास कर सकते हैं. नींद पूर्ण करें, स्वस्थ आहार खाएं, नियमित रूप से व्यायाम करें, मानसिक स्थिति का ध्यान रखें और हर दिन ध्रुवण बना लें. अगर यह समस्या लंबे समय तक बनी रहती है या आपके लिए चिंताजनक …
मुझे ऐसा लगता है कि मैंने सारी प्रेरणा और आशा खो दी है और जीवन निरर्थक लगता है	मैं समझ सकता हूँ कि इस तरह का अनुभव करना किसी भी व्यक्ति के लिए कठिन हो सकता है। यह अस्वाभाविक है कि हमें सबसे मुख्य बातें खोने का अनुभव हो रहा हैं और जीवन का मतलब खो रहा है। लेकिन, आपको याद रखना चाहिए कि यह एक सामान्य अनुभव है और आप अपने जीवन में पुनः प्रेरणा और आशा का मूल्यांकन कर सकते हैं। यहां कुछ विचार हैं जिन्हें आप अपने जीवन में अपना सकते हैं: 1. स्वस्थ रहें: अपने शरीर और मन का ध्यान रखना …
मैं कभी-कभी बहुत घबराया हुआ महसूस करता हूं, और कभी-कभी मैं नीचे भी महसूस करता हूं, लेकिन मुझे नहीं पता कि मैं अपना मूड कैसे बदलूं	मूड को बदलने के लिए कुछ टिप्स हैं जो आपकी मदद कर सकते हैं: 1. शारीरिक स्वस्थ रहें: नियमित रूप से व्यायाम करें, स्वस्थ खाद्य पदार्थ खाएं और पर्याप्त सोएं। शारिरिक सेहत बढ़ाने से मूड में सुधार हो सकता है। 2. क्रियाशील रहें: अपने रोजमर्रा के कार्यों में इंटरेस्ट लें, निश्चित लक्ष्य निर्धारित करें और उने पूरा करने के लिए प्रयास करें। सक्रिय रहने से मंत्रित महसूस कर सकते हैं। 3. सकारात्मक सोचें: अपने …
मुझे अपनी सोच और धारणा के साथ समस्या है, और मुझे अक्सर अजीब आवाजें सुनाई देती हैं या अजीब चीजें दिखाई देती हैं, जिससे मुझे बहुत डर लगता है	इस तरह की समस्याएं अक्सर उच्चतम स्तर के तनाव, मानसिक संतुलन की कमी या मानसिक स्वास्थ्य के अन्य कारणों के कारण हो सकती हैं। इस समस्या का सटीक कारण और उपचार के बारे में बातचीत करने के लिए, मैंने एक पेशेवर सलाहकार द्वारा ठेकेदारियों का सम्मान करने की सलाह दी है। वे आपकी सामर्थ्य और आवश्यकताओं का समीक्षण करके आपकी मदद कर सकते हैं। आपके स्थानीय चिकित्सक से संपर्क करना और अपनी समस्या को उन्हें बताना भी…
मैं अक्सर तनावग्रस्त और चिंतित महसूस करता हूं, अपनी भावनाओं और तनाव को नियंत्रित करने में असमर्थ होता हूं, जिससे मुझे बहुत बेचैनी और बेचैनी महसूस होती है।	तनाव और चिंता हमारे दिनचर्या में आम समस्याएं हैं, लेकिन इसे नियंत्रित करना संभव है। यहां कुछ उपाय हैं जो आपको तनाव से राहत दिलाने में मदद कर सकते हैं: 1. नियमित व्यायाम करें: योग, ध्यान या निःश्वासन व्यायाम आपको शांति और स्थिरता प्रदान कर सकते हैं। व्यायाम से आपका मन तनाव से दूर रहता है और शारीरिक स्वास्थ्य भी सुधारता है। 2. संयमित शारीरिक और मानसिक आहार: स्वस्थ आहार लेना और पर्याप्त पानी पीना आप…
मैं अक्सर अकेला और असहाय महसूस करता हूं, और जब मेरे आसपास कोई होता है तब भी मैं खाली महसूस करता हूं। मुझे नहीं पता कि ऐसा क्यों हो रहा है, मैं कैसे मदद मांग सकता हूं?	आप यह सही जगह आए हैं और मैं आपकी सहायता करने के लिए यहां हूं। यह जानने में मदद कर सकता है कि आप जब भी अकेला और असहाय महसूस करते हैं, तो आपके मन और भावनाओं के पीछे क्या हो सकता है। ध्यान देने योग्य संदर्भ, ऐसे कारण और संगती चीजों की तलाश करना मददगार साबित हो सकता है। आपके आसपास के लोग, सामाजिक संपर्क, खाली जगह की अनुभूति इत्यादि एक-एक कारण हो सकते हैं। एक सामान्य रूप से, यह महसूस हो सकता है कि आपक…
मुझे अतीत में सदमा पहुँचा है, और अब मैं हमेशा उस अनुभव को भय और दर्द के साथ याद करता हूँ, और मुझे इस भावना पर काबू पाने के लिए मदद लेने की ज़रूरत है।	मैं यह समझता हूँ कि अतीत की एक बुरी याद को याद करना और उससे पीड़ा महसूस करना कठिन हो सकता है। इस तरह के भावनाओं को काबू में रखने में सक्षम होना आपके लिए मुख्य है। यहां कुछ स्थितियाँ हैं जो आपको मदद कर सकती हैं: 1. ध्यान केंद्रित करें: मेडिटेशन या प्राणायाम की एक आम्न साझा करने वाली तकनीक का उपयोग करके, अपने मन को शांत करें और विचारों को नियंत्रित करने में मदद प्राप्त करें। 2. सोचने की प्रक्रिया ब…
मैं अतीत की यादों से छुटकारा नहीं पा रहा हूं, और जब भी मैं कुछ चीजों के बारे में सोचता हूं, तो मुझे बहुत दर्द होता है, और यह मेरे रोजमर्रा जिंदगी को भी प्रभावित करता है	यदि आप किसी अतीत की यादों से छुटकारा नहीं पा रहे हैं और यही यादें आपको दुख पहुंचा रही हैं, तो इस समस्या का समाधान करने के लिए कुछ तरीके हैं: 1. जरूरी है कि आप अपनी मौजूदा स्थिति की स्वीकार करें और आपके अतीत के व्यक्तियों या घटनाओं को स्वीकार करने का प्रयास करें। जितना मामला संभव हो सके, उन्हें स्वीकारित करने की कोशिश करें, चाहे वह आपके लिए मुद्दा हो या उन व्यक्तियों के लिए जिन्होंने आपको दुख पहुं…
मुझे धमकाया जाता था और अब जब भी मैं इसके बारे में सोचता हूं तो मुझे डर लगता है और बुरे सपने भी आते हैं	मुझे खेद है कि आपको ऐसी अनुभूति हो रही है। धमकी एक बहुत ही गंभीर समस्या हो सकती है, इसलिए मानसिक स्वास्थ्य के लिए इसे हल करना महत्वपूर्ण है। यहां कुछ सुझाव हैं जो आपको मदद कर सकते हैं: 1. सुरक्षित और सबसे अच्छा वातावरण छानें: अपने आसपास की सुरक्षा को सुनिश्चित करें। अपने घर में और आपके आसपास उसे बदलें जहां आप धमकाएँ महसूस करते हैं। 2. मदद लेने के लिए संपर्क करें: अपने परिवार और दोस्तों के साथ इस …
मैं अधिक से अधिक अकेला महसूस करता हूं, कोई दोस्त नहीं, कोई रिश्तेदार नहीं, भले ही कोई आसपास हो, मैं बहुत खाली और असहज महसूस करता हूं	आप केवल हो सकते हैं पर्याप्त संबंध या दोस्त नहीं होने के लिए मन खाली और असहज महसूस करते हैं। इस स्थिति में, आप कुछ चर्चा या सहयोग धूंधने के लिए निम्नलिखित कार्रवाईयों को मध्यस्थता कर सकते हैं: 1. समुदाय में शामिल हों: आपके आसपास के मानचित्र की जांच करें और स्थानीय ग्रुप्स, क्लब्स, संगठन या समुदाय कार्यक्रमों की खोज करें जिनमें आप हिस्सा ले सकते हैं। ये आपको लोगों के साथ संपर्क बनाने और संदर्भ में…
मुझे हमेशा ऐसा लगता है कि मैं ध्यान केंद्रित नहीं कर सकता, कार्यों को पूरा करना कठिन है, और मैं अक्सर थका हुआ और उदास रहता हूँ	यह आपके लिए काफी सामान्य कार्य और अनुभव हो सकते हैं। ध्यान केंद्रित करने की क्षमता और कार्यों को पूरा करने की प्रभावशालीता को बढ़ाने के लिए, आप कुछ निम्नलिखित सुझावों को आजमा सकते हैं: 1. एक निश्चित समय के लिए ध्यान केंद्रित कार्य: दिनभर कुछ समय का इंतजार करें और इसे एकाग्रता से अपने कार्य निर्धारित करें। आप इसे एक अलार्म लगाकर भी याद रख सकते हैं। 2. कार्य को अनुभव से बढ़ावा दें: अपने कार्य में र…
मैं अक्सर अकेला और खोया हुआ महसूस करता हूँ, दूसरों के साथ घनिष्ठ संबंध स्थापित करने में असमर्थ रहता हूँ, यहाँ तक कि लोगों और अपने आस-पास की चीज़ों के लिए रुचि और उत्साह भी खो देता हूँ।	यह सामान्य एहसास है जो कि कई लोगों को प्रभावित कर सकता है। यह आत्म-विश्वास एवं समय-समय पर अधिकतम संयोजन बना रखने की एक संक्षिप्तता की युक्ति हो सकती है। यहाँ कुछ सुझाव हैं जो आपकी मदद कर सकते हैं: 1. स्वास्थ्य सुनिश्चित करें: दूसरों के साथ संबंध बनाने के लिए, स्वास्थ्य और कुशलता का अनुरक्षण ध्यान में रखना महत्वपूर्ण है। सामाग्री भोजन, नींद और व्यायाम जैसे आदर्श स्रोतों का पालन करें। 2. अवसरों का …
मैं अकेला और खोया हुआ महसूस करता हूँ और मुझे नहीं लगता कि मैं अन्य लोगों के साथ घनिष्ठ संबंध बना सकता हूँ, जो मुझे बहुत उदास और असहाय बनाता है	मुझे खेद है कि आपको ऐसा अनुभव हो रहा है। यह एक सामान्य भावना हो सकती है, लेकिन यह स्थिति बदलने के लिए कई उपाय हैं। यहां कुछ सुझाव हैं जो आपकी मदद कर सकते हैं: 1. स्वयं को समझें: अपने मनोबल का ध्यान रखें और खुद को समझने का प्रयास करें। आपकी असहायता और अलगाव से जुड़े मानसिक सचेतता के बारे में विचार करें। 2. संगठनात्मक सहायता: यदि आप एक संगठन, समुदाय या क्लब में शामिल हों, तो वहां अवसर खोजें जहां आप…
मेरे आसपास हर कोई खुश है, लेकिन मैं अंदर से खालीपन महसूस करता हूं, किसी भी आनंद का आनंद लेने में असमर्थ हूं	यह सामान्य है कि हम सबके पास एक मस्तिष्क है जो अक्सर हमें खुशी और आनंद के अनुभवों तक पहुंचने में मदद करता है। लेकिन कभी-कभी, हमारे अंदर कुछ बातें होती हैं जो हमें खालीपन महसूस कराती हैं। यह सामान्य है और आप अकेला नहीं हैं। मानसिक स्वास्थ्य को बरकरार रखना महत्वपूर्ण होता है। यह उसी तरह जरूरी है जैसे शारीरिक स्वास्थ्य। यदि आप महसूस कर रहे हैं कि आप खालीपन में महसूस कर रहे हैं, तो कुछ सामान्य और प्र…
मेरा आत्म-सम्मान कम था और मैं अक्सर खुद को बेकार और महत्वहीन महसूस करता था, जिसके कारण मैं अपने सपनों और लक्ष्यों को हासिल करने से डरता था, असफलता से डरता था और दूसरों द्वारा तुच्छ समझे जाने से डरता था।	यह काफी सामान्य है कि आत्म-सम्मान कम होने के कारण हम खुद को बेकार और महत्वहीन महसूस करते हैं, और इसके परिणामस्वरूप हम अपने सपनों और लक्ष्यों को हासिल करने में डरते हैं। लेकिन आपकी स्थिति सुधारने के लिए कुछ कदम उठाए जा सकते हैं। 1. स्वीकार करें कि आप महत्वपूर्ण हैं: आपकी मान्यता करें कि आप महत्वपूर्ण हैं और अपने सपनों और लक्ष्यों का हकदार हैं। आपका आत्म-सम्मान आपके अंदर से आएगा और इसलिए इसे स्वीका…
मैं खुद को चीजों के प्रति अत्यधिक संवेदनशील पाता हूं और अक्सर छोटी-छोटी बातों को लेकर बेचैन और चिंतित महसूस करता हूं	यह एक आम स्थिति है और कई लोगों के साथ होती है। चिंता और ऊपरी प्रभाव हमें असुविधा में डाल सकते हैं। इससे बचने का कुछ तरीके हैं: 1. स्थिति को समझें: आपको अपनी संवेदनशीलता को समझने और जानने की कोशिश करनी चाहिए। यह जानना महत्वपूर्ण है कि आपको क्या और क्यों प्रभावित कर रहा है। 2. अपनी ताकत को स्वीकार करें: आपकी संवेदनशीलता आपकी आदत या गुण नहीं है। यह सिर्फ आपकी पहचान का हिस्सा है। इसे स्वीकार करें और …
मेरे माता-पिता हमेशा मुझसे एक अच्छा इंसान बनने की बहुत उम्मीदें रखते थे, लेकिन मुझे ऐसा लगता था कि मैं उनके मानकों पर खरा नहीं उतरता, मैं चिंतित और कम आत्मसम्मान वाला था	यह काफी सामान्य है कि हमें अपने माता-पिता के उम्मीदों को पूरा करने के बारे में चिंता हो सकती है। लेकिन यह महत्वपूर्ण है कि आप खुद को स्वीकारें और स्वीकारें कि हर किसी की परिभाषा और परामिति का मतलब अलग हो सकता है। ऐसा लगाने से आपकी आत्महित को कमी हो सकती है और अस्पष्ट उम्मीदों के चलते आप अपनी वास्तविक ताकतों और प्रतिभाओं को छिपा सकते हैं। इसलिए, यह महत्वपूर्ण है कि आप अपने आप को स्वीकारें और कैसे …
मैं हर दिन सपने देखता हूं, इसे बार-बार दोहराता हूं, जैसे कि बिना किसी निकास के चक्रव्यूह में खो गया हो	सपने देखना कुछ लोगों के लिए आम बात है। दिन भर के अनुभवों और सोच के कारण, हमारी दिमागी गतिविधियों को रात को भी चलते रहते हैं। इसलिए, आपके रोजाना सपने देखने की स्थिति आम हो सकती है। जैसे ही आप सोते हैं, आपका दिमाग आपके सामयिक अनुभवों और ध्यान क मरीचिकाओं को समय परसमय चित्रित करने के लिए काम करता है। इसका अभ्यास करना आपके स्वाभाविक त्रान्ति का संकेत हो सकता है और इस वजह से इसे दोहराने का मन बन सकता …
जब भी मैं अकेला होता हूं, तो मैं उन सभी चीजों के बारे में सोचता हूं जो पहले हुई थीं, और हर चीज मुझे बहुत दुखी करती है	यह सामान्य है कि जब हम अकेले होते हैं, तब हम अपने पूर्वाग्रहों, गमों और दुखों के बारे में सोचते हैं। इसकी वजह सामान्यतः यह हो सकती है कि हम अकेले होते समय अपने सोच और भावनाओं के साथ आत्म-यातना करने के लिए समय पा सकते हैं। हम मान सकते हैं कि यह चीजें हमें बहुत दुखी करती हैं, लेकिन हम अपने विचारों को बदलकर और पोजिटिव कार्यों में ध्यान देकर इससे बच सकते हैं। आप अपने दिन की शुरुआत प्रार्थना, ध्यान यो…
जब मैं अपने शरीर को देखता हूं, तो मुझे बहुत भद्दा, बहुत बुरा लगता है	शायद आपको अपने शरीर पर संतुष्ट नहीं है और आप निराश हो रहे हैं। आपके इस प्रकार के भावनाओं को समझना महत्वपूर्ण है और आपका यह अनुभव का कारण भी हो सकता हैं। शरीर पर आत्मविश्वास, स्वास्थ्य और सुंदरता के प्रतीक होने के साथ-साथ ऐसे सामाजिक और प्राकृतिक मानकों के प्रतीक भी हो सकते हैं। यदि आप अपने शरीर पर असंतुष्ट हैं, तो यह फिर से सोचने का समय हो सकता है कि आप अपने शरीर के लिए क्या संदेह और अनुशासन के स…
मुझे आत्मकेंद्रित है, मुझे नहीं पता कि दूसरों के साथ कैसे संवाद करना है, मैं पूरी तरह से अलग दुनिया में अलग-थलग महसूस करता हूं, मैं बहुत दुखी और असहाय महसूस करता हूं।	मैं आपकी मदद करने के लिए यहां हूँ। दूसरों के साथ संवाद करना एक कौशल है जिसे सीखना संभव है। यहां कुछ सुझाव हैं जो आपको मदद कर सकते हैं: 1. सामान्य महसूस: दूसरों के विचारों और भावनाओं को समझने का प्रयास करें और सामान्य रूप से उत्पन्न होने वाले महसूसों को पहचानें। यह आपको संवाद को सुगम और सहज बनाने में मदद करेगा। 2. श्रद्धा और संवेदनशीलता: दूसरों की बातों पर ध्यान दें और उनकी अहमियत को मान्यता दें। …
मुझे एक बार एक दोस्त ने धोखा दिया था, इससे मुझे बहुत दुख हुआ, मुझे मानवता और दोस्ती की विश्वसनीयता पर संदेह होने लगा, और यहां तक कि खुद को बंद करना और दूसरों को अलग करना शुरू कर दिया	मैं समझता हूँ कि धोखा खाने के बाद आपको बहुत दुख हुआ होगा और आपके मन में विश्वास की कमी आई होगी। ऐसे समय में बहुत आम है कि हम खुद को सुरक्षित रखने के लिए अन्य लोगों से अलग करने का फैसला करते हैं। हालांकि, मैं आपको यह समझाना चाहूँगा कि हर किसी के साथ ऐसा नहीं होता है और एक विश्वसनीय और सही दोस्त मिलना आपकी जि़न्दगी में खुदरा है। एक धोखा देने वाले दोस्त के कारण सभी लोग गलत नहीं होते हैं। अगर आपको मा…
आज के समाज में लोग अक्सर खुद को छोड़ देते हैं या आत्महत्या भी कर लेते हैं क्योंकि वे अपना काम पूरा नहीं कर पाते हैं।	यह वास्तव में एक चिंताजनक मुद्दा है और इसके कई कारण हो सकते हैं। आपके द्वारा उठाए गए सवाल को विस्तार से समझने के लिए, कृपया विचार करें कि आप किस दृष्टिकोण से यह प्रश्न पूछ रहे हैं - क्या आप वैयक्तिक स्तर पर या सामाजिक स्तर पर इसे देख रहे हैं? एक इंसान अपना काम पूरा नहीं कर पाने की वजह से तनाव, दबाव या असफलता का अनुभव कर सकता है, जिससे वह अपनी स्वस्थानिक और मानसिक समृद्धि को प्रभावित करता है। पता …
मैं हमेशा अपने अतीत और अपने भविष्य के बारे में सोच रहा था, इसके बारे में चिंतित और परेशान महसूस कर रहा था, यह नहीं जानता था कि इसके साथ क्या किया जाए।	यह सामान्य है कि हमें अपने अतीत और भविष्य के बारे में सोचने का मन करता है। लेकिन इसके चिंताजनक परिणामों से बचने के लिए आप कुछ कार्यवाही कर सकते हैं। पहले, आप अपनी ध्यानशक्ति को अपने प्रासंगिक और वर्तमान अनुभवों में ध्यान केंद्रित कर सकते हैं। जब हम वर्तमान क्षण में जीते हैं, तो हम अपनी स्थिति को समय-समय पर अधिक सकारात्मक रूप से महसूस करते हैं। किसी भी नई कार्य या मनोरंजन ढेर सारे मनोभाव को संचित …
जब भी मैं लोगों के एक बड़े समूह के सामने होता हूँ तो मुझे हमेशा अजीब लगता है	यदि आपको लोगों के साथ एक बड़े समूह के सामने एक कुछ अजीब सा लगता है, तो यह कई कारणों से हो सकता है। यहां कुछ मुख्य कारण बताए गए हैं: 1. सामंजस्य की कमी: कई बार एक बड़े समूह के सामने होने पर, लोगों के बीच में सामंजस्य की कमी हो सकती है। यह लोगों के अभिभावकता, मतभेद, आपसी मतभेद, भाषाई विभाजन या सामाजिक कारकों के कारण हो सकता है। 2. भीड़भाड़ और बहुसंख्यकता का भय: बड़े समूह के सामने होने से कुछ लोगों …
मैं अपनी शक्ल-सूरत से खुश नहीं हूं और हमेशा बदसूरत महसूस करता हूं। इससे मैं मेलजोल और दोस्त बनाने को लेकर बहुत असुरक्षित हो जाता हूं। मैं इस मानसिकता को कैसे सुधार सकता हूँ?	यह सामान्य है कि हम सब अपनी शक्ल-सूरत से संतुष्ट नहीं होते हैं, और ऐसी भावना महसूस करना किसी न किसी के लिए सामान्य है। लेकिन, आप यह जानना चाहते हैं कि इस मानसिकता को सुधारने के लिए क्या कर सकते हैं। यहां कुछ उपाय हैं जो आपकी मदद कर सकते हैं: 1. सकारात्मक सोच: खुद को सकारात्मक और उच्च सोचने का प्रयास करें। अपनी खूबसूरतियों, अदाएं और गुणों पर ध्यान केंद्रित करें। याद रखें, सच्ची खूबसूरती बाहरी समरू…
मैं भविष्य के बारे में भय और चिंता से भरा हुआ हूं, और मुझे नहीं पता कि भविष्य में चुनौतियों और दबावों से कैसे निपटा जाए।	भविष्य के बारे में भय और चिंता आमतौर पर अप्रासंगिक होते हैं, क्योंकि हम उस पर कोई नियंत्रण नहीं रख सकते। हालांकि, चिंता करने के बजाय, आप निम्न चरणों का पालन करके अपनी स्थिति पर नियंत्रण प्राप्त कर सकते हैं: 1. व्यायाम और योग: नियमित व्यायाम और योग आपको शारीरिक और मानसिक रूप से मजबूत रखने में मदद करेंगे। ये आपकी मनःस्थिति को स्थिर और शांत रखने में मदद कर सकते हैं। 2. ध्यान या मेडिटेशन: नियमित ध्या…
मैं अपने आप को लगातार बिना रुके विचारों के चक्रव्यूह में फंसता हुआ पाता हूं, एक ही समस्या या स्थिति पर बार-बार चिंतन करता हूं, जिससे नींद और दैनिक जीवन खराब हो जाता है।	इस प्रकार की स्थिति सामान्य जीवन में हो सकती है और इससे निपटने के लिए कुछ उपाय हैं। यहां कुछ सुझाव हैं जिनका आप अनुसरण कर सकते हैं: 1. प्राथमिकताओं को तय करें: चिंता के कारण विचारों में फंसने की स्थिति में, आपको अपने प्राथमिकताओं को स्पष्ट करने की जरूरत होती है। क्या आपकी स्वास्थ्य, सुख, परिवार, पेशेवर या व्यक्तिगत जीवन की कोई अहमियतपूर्ण जरूरत है जिसके लिए आपको ध्यान देना चाहिए। अपने अहमियतपूर्ण…
मैं कुछ दर्दनाक अनुभवों से गुज़रा हूँ जो मेरे साथ जुड़े हुए हैं। मुझे इन भावनाओं और यादों को संसाधित करना मुश्किल हो गया है, जिससे मेरी स्वास्थ्य स्थिति खराब हो गई है।	यदि आप दर्दनाक अनुभवों से जूझ रहे हैं और इससे आपकी स्वास्थ्य स्थिति प्रभावित हो रही है, तो इस समस्या को संबोधित करना बहुत महत्वपूर्ण होता है। यहां कुछ सुझाव हैं जो आपकी मदद कर सकते हैं: 1. व्यायाम और योग: प्रायाम, ध्यान और योगाभ्यास आपको मानसिक और शारीरिक दोनों स्तरों पर शांति और स्वास्थ्य प्राप्ति में मदद कर सकता है। 2. स्वस्थ आहार: स्वस्थ और बाल वर्धक आहार लेने का प्रयास करें। यह आपकी मानसिक और…
मैं अक्सर उदास और गमगीन महसूस करता हूँ, जिंदगी का आनंद और प्रेरणा खो देता हूँ, और भविष्य में कोई विश्वास नहीं होता, यह भावना मुझे बहुत दर्दनाक और असहाय महसूस कराती है	मैं समझता हूँ कि यह बहुत दुखद हो सकता है जब आप उदास और गमगीन महसूस करते हैं और जिंदगी से खुशी और प्रेरणा खो देते हैं। यह एक सामान्य प्रतिक्रिया हो सकती है, लेकिन महत्वपूर्ण है कि आप इसे सुलझाने का प्रयास करें। इस स्थिति से बाहर निकलने के लिए, आप मनोशान्ति की तलाश कर सकते हैं। चिंताओं और विचारों को सामरिक रूप से संघटित करने के लिए ध्यान देने योग्य क्रियाएँ जैसे ध्यान, मेडिटेशन या प्राणायाम का अभ्य…
हाल ही में, उनके बच्चे अक्सर अपना आपा खो देते हैं और यहां तक कि घर की वस्तुओं को भी नष्ट कर देते हैं, जो अवसाद का लक्षण हो सकता है	यदि आपके बच्चे अपना आपा खो रहे हैं और घर की वस्तुओं को नष्ट कर रहे हैं, तो आप इन समस्याओं का सामना कर रहे हैं और आपको चिंता हो रही है कि इनका मूल कारण क्या हो सकता है। एक महत्वपूर्ण कदम हो सकता है अपने बच्चे के व्यवहार को समझना और संवाद स्थापित करना। बच्चों के इस तरह के व्यवहार के पीछे विभिन्न कारण हो सकते हैं, जैसे अकेलापन की भावना, ध्यान की कमी, या मानसिक समस्याएँ। उनसे बातचीत करके आप उनके मन क…
मैं अक्सर तनावग्रस्त और चिंतित महसूस करता हूं, छोटी-छोटी चीजें भी मुझे बेचैन और तनावग्रस्त महसूस करा सकती हैं, आराम करना और जिंदगी का आनंद लेना मुश्किल है	यह सामान्य है कि हम सभी कभी-कभी तनाव और चिंता महसूस करते हैं। लेकिन हम कुछ तरीकों का उपयोग करके इसे कम कर सकते हैं और अपनी जिंदगी का आनंद ले सकते हैं। यहां कुछ सुझाव हैं: 1. स्वास्थ्यप्रद आदतें बनाएं: नियमित रूप से योग या ध्यान करना, बाहर टहलने जाना, समय-समय पर व्यायाम करना और स्वस्थ भोजन खाना तनाव को कम करने में मदद कर सकते हैं। 2. अपने सोच को परिवर्तित करें: नकारात्मक सोच को सकारात्मक सोच में ब…
मैं अपने शरीर से बहुत असंतुष्ट हूं, मैं हमेशा बहुत मोटा या बहुत पतला महसूस करता हूं, और मुझे नहीं पता कि मैं अपने शरीर को कैसे स्वीकार करूं	यदि आप अपने शरीर से असंतुष्ट हैं और आपको अपने शरीर को स्वीकार करने में समस्या हो रही है, तो निम्नलिखित सुझाव आपकी मदद कर सकते हैं: 1. स्वस्थ जीवनशैली अपनाएं: एक स्वस्थ आहार और व्यायाम की अच्छी आदत अपनाने के लिए प्रयास करें। नियमित रूप से आहार में पौष्टिक खाद्य पदार्थों को शामिल करें और अपने शरीर को स्वस्थ व्यायाम के लिए समय दें। इससे आप अपने शरीर की सेहत बढ़ा सकते हैं और स्वस्थ वजन को बनाए रख सकत…
मुझे अपने स्वयं के प्रदर्शन और क्षमता पर विश्वास की कमी है। मुझे हमेशा लगता है कि मैं अच्छा नहीं कर सकता, और मुझे असफलता और दूसरों द्वारा हँसे जाने का डर है।	यह सामान्य है कि हम सबको कभी-कभी अपने प्रदर्शन और क्षमता पर विश्वास की कमी महसूस होती है। लेकिन इससे निपटने के कुछ तरीके हैं जो आपकी सहायता कर सकते हैं: 1. सकारात्मक विचार: अपने मन को सकारात्मक वक्तव्यों और भावनाओं की ओर मोड़ने का प्रयास करें। यह मदद करेगा कि आप खुद पर विश्वास रखें और ऐसे विचारों को अनुभव करें जो आपकी सफलता की ओर ले जा रहें हैं। 2. कमेटमेंट का निर्धारण करें: चुनौतियों को स्वीकार …
मेरे मूड में बेतहाशा उतार-चढ़ाव आया, बिना किसी पैटर्न के बहुत ऊपर से बहुत नीचे।	दिनचर्या में आने वाले ये उतार-चढ़ाव सामान्य बात हैं। कुछ कारण जैसे तनाव, थकान या भावनात्मक स्थितियाँ इसपर प्रभाव डाल सकते हैं। ऐसी स्थिति में आप कुछ उपाय करके अपने मूड को स्थिर कर सकते हैं। यहां कुछ आसान तरीके हैं जो आपकी मदद कर सकते हैं: 1. व्यायाम करें: अपने शरीर के प्रति निष्ठा करके एक छोटा सा व्यायाम करें। यह आपके मस्तिष्क को उतेजित करके मदद करेगा। 2. संगीत सुनें: अपने पसंदीदा गानों को सुनने …
जब मैं भीड़ में होता हूं, तो मुझे हमेशा उपेक्षित या अस्तित्वहीन महसूस होता है, जो मुझे बहुत अकेला और खोया हुआ महसूस कराता है	यह सामान्य है कि जब हम अधिकांश भीड़ और गणनीय लोगों के बीच होते हैं, तो हमें अक्सर उपेक्षित या अस्तित्वहीन महसूस हो सकता है। ऐसा होने के कई कारण हो सकते हैं, जैसे कि हम परिचय नहीं कर पा रहे हों, हमारी बातें नगरिकों द्वारा सुनी नहीं जा रही हों, या हमें संपर्क बनाने के लिए कोई भी प्रयास नहीं कर रहा हो। आपके द्वारा व्यक्त किए गए भावनाओं को समझते हुए, मैं कुछ सुझाव दे सकता हूँ। पहले से परिचित लोगों से…
मैं अक्सर महसूस करता हूँ कि मैं इतना अच्छा नहीं हूँ कि दूसरों का अनुमोदन और सम्मान प्राप्त कर सकूँ	यह सामान्य है कि हम सब नेगेटिव सोचते हैं और स्वयं को अनुमानित करते हैं कि हम अच्छे नहीं हैं। लेकिन यह ध्यान देना महत्वपूर्ण है कि हम सभी अपने तरीके में अद्वितीय होते हैं और ध्यान देने योग्य क्षमताओं वाले होते हैं। यदि आप स्वयं के बारे में अधिक सकारात्मक सोच संवाद करें, तो आप देखेंगे कि आप में भी कई गुण हैं जो आपको अनुमोदित करते हैं और आपका सम्मान करते हैं। आपकी बातचीत करने वाले लोग आपकी राय और दृ…
मैं भविष्य को लेकर भ्रमित और असहाय महसूस करता हूं, मुझे नहीं पता कि किस दिशा में जाना है, यह मुझे बहुत चिंतित और बेचैन करता है	मुझे समझने के लिए इम्प्रेशन बनाने के लिए धन्यवाद! भविष्य के बारे में चिंतित होना एक सामान्य अनुभव है, लेकिन इसका कारण आपकी स्थिति के बारे में अनिश्चितता हो सकती है। इस प्रकार के भ्रम और असहायता से निपटने के लिए, निम्न उपायों को ध्यान में रखें: 1. विचार करें जो आपको प्रासंगिक लगे: समय बिताने के लिए एक नियामित ध्यानाभ्यास, मेडिटेशन या योग आपको मदद कर सकते हैं। इससे आपको आंतरिक शांति, मन की स्थिरता …
मुझे हमेशा यह चिंता रहती थी कि मेरे कार्यों और निर्णयों की दूसरों द्वारा आलोचना और अस्वीकृति की जाएगी, जिससे मैं बहुत असुरक्षित और निराश हो गया था।	यह एक सामान्य चिंता हो सकती है, लेकिन आपको अपने कार्यों पर विश्वास रखना चाहिए। यह सुनिश्चित करने के लिए कुछ सरल उपाय हैं: 1. ऑटोक्रिटिकल विचार: आप अपने कार्यों को पुनर्विचार कर सकते हैं और आपकी निर्णय प्रक्रिया को समीक्षा कर सकते हैं। यदि आपको अपने कार्य में विश्वास है, तो दूसरों की राय और आपत्तिजनक कहीं भी जाएंगी। 2. संतुष्टि करें: दूसरों की राय का महत्व न सिर्फ जाने बल्कि उनकी अपनी राय को समझें…
मैं खुद को मारना चाहता हूं लेकिन मेरी हिम्मत नहीं होती, मैं बस खुद को छुपाना चाहता हूं और फिर कभी बाहर नहीं आना चाहता	मैं बहुत ही चिंतित हूं कि आप ऐसी स्थिति में हैं। इसके बारे में सोचने से पहले, कृपया एक मानसिक स्वास्थ्य विशेषज्ञ से संपर्क करें या अपने निकटतम सामाजिक सहायता हेल्पलाइन से संपर्क करें। वे आपको उचित सलाह और सहायता प्रदान कर सकते हैं। आप इसमें अकेला नहीं हैं, और आपके चारों ओर लोग हैं जो आपको समर्थन देने के लिए तत्पर हो सकते हैं।
मेरा परिवार हमेशा मेरी आलोचना करता है और मुझे बहुत आहत करता है, मुझे नहीं पता कि उनसे कैसे संवाद करूं, वे मुझसे बहुत दूर हो गए हैं	मैं समझता हूँ कि ऐसा महसूस करना बहुत कठिन हो सकता है जब परिवार के सदस्य आपकी आलोचना करते हैं और आपको आहत करते हैं। यह स्थिति में संवाद करना महत्वपूर्ण हो सकता है ताकि आप अपनी भावनाओं को साझा कर सकें और समस्या को हल कर सकें। यहां कुछ सुझाव हैं जो आपको मदद कर सकते हैं: 1. साफ़ होने की कोशिश करें: अपनी भावनाओं और समस्या के बारे में स्पष्ट रूप से सोचें। क्या आपको उनसे क्या उम्मीदें हैं? क्या आप वास्त…
मैं छोटी-छोटी बातों पर निराश हो जाता था, भावनात्मक उतार-चढ़ाव से उबरने में परेशानी होती थी, और खुद को बेकार महसूस करता था।	यह सामान्य बात है कि हम सभी कभी-कभी छोटी-छोटी बातों पर निराश हो जाते हैं और अपनी भावनात्मक स्थिति में उबरने में परेशानी होती है। यह आपके जीवन का हिस्सा हो सकता है, लेकिन इसे नियंत्रित करना संभव है। यहां कुछ सुझाव हैं जिन्हें आप अपने मानसिक स्वास्थ्य को सुधारने के लिए अपना सकते हैं: 1. मेडिटेशन या द्यान का अभ्यास करें: यह मानसिक चंचलता को कम करने और मन को शांत करने में मदद करता है। आप रोजाना कुछ म…
मुझे मेरे साथियों द्वारा धमकाया गया था, जिसके कारण आत्म-सम्मान में कमी और अस्वीकृति का डर था।	मुझे खेद है कि आपको ऐसी चुनौती का सामना करना पड़ा। यह आपके लिए गंभीर हो सकता है, लेकिन इसके बावजूद, आपस्तित्व और आत्म-सम्मान को बनाए रखने में आपकी सहायता कर सकता हूँ। पहले और सबसे महत्वपूर्ण चीज है कि आप ऐसी स्थिति का इलाज करें जिसने आपको हानि पहुंचाई है। यदि आपको किसी व्यक्ति के साथ सुरक्षित नहीं महसूस हो रहा है, तो कृपया अपने सुरक्षा को अपने प्राथमिकता के रूप में रखें और लोगों के समर्थन के साथ …
हाल ही में मुझे ऐसा महसूस हो रहा है कि मेरा मूड बहुत ज्यादा बदल रहा है। कभी-कभी मैं खुश होता हूं और कभी-कभी बिना किसी कारण के उदास हो जाता हूं। यह मुझे परेशान कर रहा है. मुझे नहीं पता कि मैं डिप्रेशन से पीड़ित हूं या नहीं।	आपका महसूस करने का तरीका काफी सामान्य है और इसमें आप अकेले नहीं हैं। मूड बदलना किसी के जीवन में सामान्य रूप से होता है। हालांकि, यदि यह आपके दैनिक कार्यों, सम्प्रेक्ष्य, और खुद बदलते मूड की वजह से आपके जीवन को प्रभावित करने लगता है, तो इसे सीरियस रूप में लेना जरूरी हो सकता है। आपके मूड पर पूर्ण नियंत्रण पाने के लिए कुछ निम्नलिखित सुझाव दिए जा सकते हैं: 1. स्वस्थ दिनचर्या बनाएं: नियमित नींद, संतुल…
मैं बहुत तनाव में था, मुझे ऐसा लग रहा था कि मैं अभिभूत होने वाला था, मुझे अक्सर घबराहट या सांस फूलने लगती थी।	यह एक आम स्थिति है और इसे आपको छोड़ना मुश्किल हो सकता है। यदि आप ऐसे तनाव के साथ अनुभव कर रहे हैं, तो यह मानसिक स्वास्थ्य समस्याओं की संभावना हो सकती है। आप इन उपायों को अपना सकते हैं: 1. विश्राम करें और ध्यान केंद्रित करें: नियमित विश्राम और मेडिटेशन, प्रायाम या योग का अभ्यास करना तनाव को कम करने में मदद कर सकता है। 2. स्वस्थ जीवनशैली अपनाएं: स्वस्थ आहार, नियमित व्यायाम और पर्याप्त नींद लेना शार…
मुझे अक्सर चिंता और भय की भावना होती है, न जाने यह कहां से आ रहा है, और कभी-कभी सांस लेना भी मुश्किल हो जाता है।	यह सामान्य है कि हमें समय-समय पर चिंता और भय की भावना हो सकती है। आपके जीवन में कुछ कारण हो सकते हैं जो इसके लिए जिम्मेदार हो सकते हैं, जैसे कि स्तरों या बनवासी तनाव की गड़बड़ी, सामाजिक दबाव, नींद की कमी, अन्य स्वास्थ्य समस्याएं आदि। शारीरिक रूप से श्वास लेने की समस्या आपके मन में चिंता और तनाव का परिणाम हो सकती है, जिसे अराम और ध्यान द्वारा नियंत्रित किया जा सकता है। नीचे दिए गए कुछ सुझावों का प…
मैंने हमेशा बेकार महसूस किया है, पर्याप्त अच्छा नहीं है, पर्याप्त स्मार्ट नहीं है, पर्याप्त सुंदर नहीं है, और यह निराशाजनक है	मुझे खेद है कि आप ऐसा महसूस कर रहे हैं। लेकिन आपकी स्थिति और दृष्टिकोण को बदलने के कई तरीके हो सकते हैं। यहां कुछ सुझाव हैं जिन्हें आप अपने आत्मविश्वास और आत्मविश्वास को बढ़ा सकते हैं: 1. सकारात्मक विचार: अपने लक्ष्यों और योग्यताओं पर विचार करें और उनमें सकारात्मक दिमागशक्ति देखें। अपने गुणों, मजबूतियों और संपूर्णता की पहचान करें। 2. आपके लिए खुद को स्वीकारें: हर व्यक्ति अद्वितीय होता है और हर कि…
मेरे मन में हमेशा आत्मघाती विचार आते हैं, मुझे लगता है कि जीवन व्यर्थ है और मेरा कोई मूल्य नहीं है। मैं भी निराश महसूस करता हूं और महसूस करता हूं कि मेरे भविष्य के लिए कोई उम्मीद नहीं है	मैं समझता हूँ कि आप इस संदेहपूर्ण स्थिति में हैं और यह आपके लिए कठिन हो सकता है। अगर आपको आत्मघाती विचार या निराशा के अनुभव हो रहे हैं, तो मैं आपको सलाह दूंगा कि आप इन मामलों को हल करने के लिए किसी विशेषज्ञ की सहायता लें। आधिकारिक रूप से, यहां कुछ सामान्य ध्यान देने योग्य सूचनाएं हैं: 1. बातचीत: अक्सर अपने विचारों और भावनाओं को दूसरों के साथ साझा करना अत्यंत महत्वपूर्ण हो सकता है। अपनी परेशानियों…
मुझे अक्सर ऐसा लगता है कि मेरा जीवन व्यर्थ है, मुझे नहीं पता कि मैं इस तरह क्यों जी रहा हूं, मुझे लगता है कि मेरा कोई उद्देश्य नहीं है, कोई प्रेरणा नहीं है, ऐसा लगता है जैसे मैं अपना समय बर्बाद कर रहा हूं, मुझे लगता है कि मैं बेकार हूं	यह सामान्य है कि इंसान कभी-कभी अपने जीवन के उद्देश्य और महत्व के बारे में सोचते हैं। आपके विचार सही हैं, लेकिन ऐसा महसूस करना एक सामान्य पहलू है और हर किसी के साथ होता है। दिन-प्रतिदिन के कामों, जिम्मेदारियों और समस्याओं में ऐसे अवधारणात्मक सोच सक्रिय होती है जबकि असल में आपका जीवन महत्वपूर्ण होता है। इस स्थिति में, आपको कुछ सामान्य चर्चाओं और मार्गदर्शन के अनुसार कुछ उपाय आजमाने में मदद मिल सकती…
मैं हाल ही में बहुत तनाव महसूस कर रहा हूं क्योंकि मेरे पास बहुत काम है और मुझे हर दिन बहुत सारे काम निपटाने पड़ते हैं, लेकिन मैं खुद को मुकमल महसूस नहीं कर पा रहा हूं, जिससे मैं बहुत उदास महसूस करता हूं। मैं इस मनोवैज्ञानिक दबाव से कैसे निपट सकता हूँ?	यदि आप तनाव के कारण उदास महसूस कर रहे हैं, तो आपको इससे निपटने के लिए कुछ चरणों का पालन करना चाहिए। नीचे दिए गए कुछ सुझाव आपकी सहायता कर सकते हैं: 1. समय प्रबंधन: अपने कामों को संगठित और प्राथमिकता के आधार पर समय व्यवस्था करें। उचित प्लेनिंग और उपायों के आवेदन से आप अपने कार्यक्रम में सुधार कर सकते हैं। 2. स्वस्थ आहार: पोषण से भरपूर सहारे और ताजगी वाले आहार लें। यदि आप ठीक रहेंगे तो तनाव के साथ न…
मैं अक्सर चिंतित और तनावग्रस्त महसूस करता हूं, ऐसा महसूस करता हूं कि मैं लाइफ में तनाव और चुनौतियों का सामना नहीं कर सकता।	यह सामान्य है कि हर किसी को अगर तनाव और चुनौतियों का सामना करना पड़ता है। लेकिन इस स्थिति के साथ संघर्ष करने के लिए कुछ उपाय हैं जिन्हें आप आजमा सकते हैं: 1. अवकाश लें: जब आप चिंतित और तनावग्रस्त महसूस कर रहे हों, तो कुछ अवकाश लेने की कोशिश करें। एक चेहरे अवकाश आपको शांति और आराम प्रदान कर सकता है। 2. योग और मेडिटेशन: योग और मेडिटेशन करना आपको मानसिक और शारीरिक स्थिरता प्रदान कर सकता है। इन तकनीक…
मेरा मन नकारात्मकता और आत्म-संदेह से भर गया है और मुझे नहीं पता कि इससे कैसे बाहर निकला जाए	यह सामान्य है कि जीवन में कभी-कभी नकारात्मकता और आत्म-संदेह की स्थिति हो सकती है। इसे हल करने के लिए निम्नलिखित कुछ उपाय कर सकते हैं: 1. सकारात्मकता की प्रवृत्ति बढ़ाएं: ध्यान दें कि जब आपके मन में नकारात्मक विचार आते हैं, तो आप अपने कर्मों को सकारात्मक बनाने के लिए प्रयास करें। यह आपके मन को उत्साह और प्रगाढ़ विश्वास प्रदान करेगा। छोटे-छोटे उपलब्धियों के लिए अपने आपको भी प्रशंसा करें। 2. सकारात्…
मुझे लगता है कि मेरी भावनाएं अधिक से अधिक अस्थिर होती जा रही हैं। कभी-कभी मैं उदास महसूस करता हूं, और कभी-कभी मैं फिर से भावुक हो जाता हूं। मुझे नहीं पता कि मेरे दिमाग में कुछ गड़बड़ है या नहीं।	यह सामान्य है कि भावनाएं समय-समय पर बदलती रहती हैं, और यह निरंतर बदलाव का भी एक हिस्सा है। हालांकि, ऐसे समयों में जब आप यह महसूस करते हैं कि आपकी भावनाएं बहुत ही अस्थिर हो रही हैं, आपको अपने मानसिक स्वास्थ्य के बारे में सोचने की आवश्यकता हो सकती है। मैं आपको सलाह दूंगा कि आप अपने मन की स्थिति को ध्यान में रखें और अपने स्वास्थ्य को लेकर जगहीं से संपर्क करें। अगर आप हमेशा उदास महसूस कर रहे हैं या आ…
जब बच्चा स्कूल से घर आता है, तो घर ठंडा होता है, और वह उसकी दया को कभी स्वीकार नहीं करता है। केवल उसने गलतियाँ की हैं, और उसका दिल खाली है। उसे क्या चिंता है कि क्या वह बड़ा होकर अपने माता-पिता जैसा बनेगा।	बच्चे के इस चिंता को समझना एक मात्रा द्वारा संभव नहीं है। हालांकि, मुझे लगता है कि उसके माता-पिता के बातचीत करना एक अच्छा पहला कदम हो सकता है। उन्हें खुले मन से बात करने की सलाह दें और उन्हें अपने भविष्य की चिंताओं को समझाने में मदद करने का प्रयास करें। इसके अलावा, उन्हें समर्थन और प्रेरणा भी प्रदान करें कि बड़े होने के साथ-साथ वे अपना खुद का व्यक्तित्व और निर्णय जारी रख सकते हैं। वे अपनी अपनी गल…
वह लगभग हर रात सो नहीं सकता है, सो नहीं सकता है और सो नहीं सकता है, उसका मूड खराब और खराब हो रहा है, और वह चिंतित है कि क्या उसे अवसाद या अन्य गंभीर मनोवैज्ञानिक समस्याएं होंगी	इस व्यक्ति के स्वास्थ्य की समस्या के लिए, उन्हें एक मनोवैज्ञानिक या चिकित्सा विशेषज्ञ की सलाह लेना उचित होगा। वे दुष्प्रभाव और अनुकूलता के साथ व्यवहार करने की आवश्यकता को संज्ञान में रखेंगे। दैनिक व्यायाम, स्वस्थ आहार, और उचित नींद की भी पालना उनके शारीरिक और मानसिक स्वास्थ्य में सुधार करने में मदद कर सकता है। उन्हें अपने दिन के कार्यक्रम में आनंद और मनोरंजन अंश भी शामिल करने की कोशिश करनी चाहिए।…
हाल ही में, मुझे हमेशा लगता है कि मैं कमजोर हूं, और मेरे विचार रस्सियों की गड़बड़ी की तरह हैं, जिन्हें मैं समझ नहीं पा रहा हूं	यदि आपको ऐसा लगता है कि आप कमजोर हैं और अच्छे विचार नहीं कर पा रहे हैं, तो यह बात आम है और ऐसा अक्सर हम सभी के साथ होता है। अपने मानसिक स्वास्थ्य के लिए सबसे महत्वपूर्ण है कि आप इसे समझें और उसे संघटित करने के लिए उचित कदम उठाएं। यहां कुछ सामान्य उपाय हैं जो आपकी मदद कर सकते हैं: 1. समय निकालें: ध्यान देने और अपने विचारों को स्वीकार करने के लिए खुद के लिए समय निकालें। योग, मेडिटेशन, पैम्परिंग एक्…
जब भी मैं अपनी असफलताओं के बारे में सोचता हूं, मैं असहाय महसूस करता हूं। यह सोचकर कि मुझे समाज ने स्वीकार नहीं किया है, मैं अपनी हिम्मत खो देता हूं। यह सोचकर कि मैं अपने सपनों को हासिल नहीं कर पाऊंगा, मैं असहाय और असहाय महसूस करता हूं	इस तरह की सोच सामान्य है जब हम असफलताओं से घिरे होते हैं, लेकिन वास्तविकता यह है कि हमारी असफलताएं हमारे व्यक्तित्व या स्वीकृति के बारे में कुछ नहीं कहतीं। प्रतिस्पर्धा और चुनौतियाँ हमें आगे बढ़ने के लिए अवसर प्रदान करती हैं, और हमारा सपनों और लक्ष्यों का पूरा करना हमारी मेहनत और समर्पण पर निर्भर करता है। ऐसे समयों में, आपको रुद्ध विचारों के साथ निपटने की जरूरत होती है और अपने मानसिक स्थिति को स्…
मेरा रिश्ता हमेशा अस्थिर रहा है, मैं अक्सर भावनात्मक संकट का अनुभव करता हूं, पता नहीं रिश्ते की समस्याओं से कैसे निपटूं, यह मुझे शक्तिहीन और खोया हुआ महसूस कराता है।	मैं आपकी मदद करने के लिए यहां हूँ। इसे समझना महत्वपूर्ण है कि रिश्तों की समस्याएं हर किसी के साथ होती हैं। यह एक सामान्य और प्राकृतिक हिस्सा है। लेकिन, आप इसे सुलझाने के लिए कुछ कदम उठा सकते हैं। यहां कुछ सुझाव हैं: 1. संवेदनशीलता और संवदेनशीलता बढ़ाना: ध्यान दें कि आप कैसे बातचीत कर रहे हैं। दूसरों के भावनाओं को समझें और ध्यान से सुनें। अपनी बातचीत में संवेदनशीलता और समझदारी बनाए रखें। 2. खुद को…
मैं कभी-कभी नियंत्रण खो देता हूं और बहुत चिड़चिड़ा और चिड़चिड़ा हो जाता हूं, और यहां तक कि अपने आसपास के लोगों के साथ अपना आपा खो देता हूं	यह आप के लिए सामान्य हो सकता है क्योंकि कई लोग अपनी नियंत्रण की कमी का सामना करते हैं। इसके साथ ही, मानसिक स्थिति, तनाव या अनुभवों के कारण आप चिड़चिड़ा और चिढ़ाने वाला हो सकते हैं। कुछ सरल उपाय आपकी स्थिति में सुधार कर सकते हैं: 1. ध्यान करें: दिनभर में ध्यानावस्था करने वाली कुछ मिनट निकालें। यह आपको मानसिक शांति प्रदान करेगा और आपकी सोच को स्थिरता मिलेगी। 2. स्वास्थ्यपूर्ण आहार: एक स्वास्थ्यपूर्…
मेरा काम तनावपूर्ण है और हर दिन समस्याओं और चुनौतियों से निपटने से मैं बहुत चिंतित महसूस करता हूं, मुझे नींद कम होने लगती है, मेरी भूख कम हो जाती है और कभी-कभी खुद को नियंत्रण से बाहर महसूस करता हूं	यह तनाव और चिंता की स्थिति के कारण आपके दिनचर्या और तनाव का प्रबंधन प्रभावित हो रहा है। इस प्रकार के स्थिति में यह महत्वपूर्ण है कि आप अपनी मानसिक और शारीरिक स्वास्थ्य को सुधारने के लिए कुछ उपाय अपनाएं। 1. समय प्रबंधन करें: अपने काम को संगठित करने के लिए एक कार्यक्रम निर्माण करें और उसे अनुसरण करें। इससे आपको अधिक संगठित महसूस होगा और आप अपने काम में अधिक अवधि दे सकेंगे। 2. स्वस्थ आहार लें: एक स्…
मैं हमेशा अपनी भावनाओं को नियंत्रित करने में असमर्थ हूं। कभी-कभी मुझे अचानक गुस्सा आ जाता है, और कभी-कभी मैं अचानक चुप हो जाता हूं, जिससे मैं अपने व्यवहार और प्रदर्शन की भविष्यवाणी करने में असमर्थ हो जाता हूं, और मैं बहुत परेशान और भ्रमित महसूस करता हूं।	आप चिंता न करें, यह सामान्य है कि हम सभी समय-समय पर भावनाओं को नियंत्रित करने में कठिनाई महसूस करते हैं। पर इसे सीखने और सुधारने के कुछ तरीके हैं: 1. विचारों को ध्यान में रखें: जब आपको अनियंत्रित भावनाएं आती हैं, तो उन्हें समय-समय पर पहचानें और उन्हें अपने मन में विचार के रूप में रखें। यह आपको उन्हें समझने और समय के साथ शान्ति प्राप्त करने में मदद करेगा। 2. शारीरिक ध्यान: सुबह की अभ्यास योग और मे…
मैं अप्रिय अतीत के अनुभवों के उलझाव से छुटकारा नहीं पा सकता, और जब भी मैं उन घटनाओं के बारे में सोचता हूं, मुझे कष्टदायी दर्द और हानि महसूस होती है।	यह बहुत सामान्य है कि हमें अप्रिय अतीत के अनुभवों से छुटकारा पाने में कठिनाई होती है और इससे हमें दर्द और हानि का अनुभव होता है। लेकिन इस स्थिति से बाहर निकलने के लिए कुछ उपाय हैं जो आपकी मदद कर सकते हैं। 1. आपको अपने विचारों को संयमित करना चाहिए। जब आप अप्रिय घटनाओं के बारे में सोचते हैं, तो अपने मन को स्थिर रखें और ध्यान केंद्रित करें। ध्यान विकसित करने के लिए प्रायामा और मेडिटेशन जैसे तकनीकों …
जब भी मैं अपनी असफलताओं के बारे में सोचता हूं, मैं असहाय महसूस करता हूं। यह सोचकर कि मुझे समाज ने स्वीकार नहीं किया है, मैं अपनी हिम्मत खो देता हूं। यह सोचकर कि मैं अपने सपनों को हासिल नहीं कर पाऊंगा, मैं असहाय और असहाय महसूस करता हूं	मुझे व्याकुलता का बोध हो रहा है कि आप असफलता के समय असहाय महसूस करते हैं। इस मानसिक स्थिति के मुद्दे को संबोधित करने के लिए, मैं आपकी मदद करने के लिए यहां हूँ। पहले तो, आपको यह जानना चाहिए कि असफलता होना सामान्य है और हर किसी के जीवन में आता है। यह इंसानी होने का एक हिस्सा है और इसे आपके असफलताओं के रूप में नहीं देखना चाहिए, बल्कि इसे एक अवसर के रूप में देखना चाहिए जिससे आप सीख सकते हैं और मजबूती…
मैं अक्सर अपनी कमियों के कारण खुद को हीन और असहाय महसूस करता हूं, महसूस करता हूं कि मैं काफी अच्छा नहीं हूं, प्यार के लायक नहीं हूं	यह प्राकृतिक है कि हम अक्सर अपनी कमियों को ज्यादा महसूस करते हैं और खुद को असहाय या हीन महसूस करते हैं। लेकिन हमें यह ध्यान में रखना चाहिए कि हर किसी के पास कमियाँ और एक साधारण इंसान होने की वजह से कम होते हैं। आपकी खुद की स्वीकृति और स्वीकार्यता आपकी खुद के प्रति प्यार और कॉन्फिडेंस के लिए महत्वपूर्ण हैं। इसके अलावा, नीचे दिए गए छोटे टिप्स आपकी मदद कर सकते हैं: 1. अपनी सकारात्मक गुणों पर ध्यान क…
मुझ पर काम और पढ़ाई का बहुत दबाव है, और मैं अक्सर थका हुआ महसूस करता हूं, लेकिन मुझे नहीं पता कि कैसे आराम करें और तनाव दूर करें।	धयान देने लायक है कि अगर आप पर काम और पढ़ाई का बहुत दबाव है और इसके कारण थक गए हैं, तो आपको अपने आप को संतुष्ट और स्वस्थ रखने के लिए कुछ समय लेना चाहिए। यहां कुछ तरीके हैं जिनसे आप आराम कर सकते हैं और तनाव कम कर सकते हैं: 1. नियमित व्यायाम करें: ध्यान देने योग और प्राणायामन जैसे शारीरिक गतिविधियों में शामिल होकर आप अपने मन को स्थिर और शांत कर सकते हैं। योग आपकी शारीरिक और मानसिक संतुलन को बढ़ाने …
मेरा मिजाज इतनी तेजी से बदलता है, खुश होने से लेकर उदास होने में बस थोड़ा ही समय लगता है, ऐसा क्यों है?	यह मानसिक स्वास्थ्य के अंकुरण का एक सामान्य अनुभव हो सकता है। मानसिक स्वास्थ्य कई कारकों पर निर्भर करता है, जिनमें आपके जीवन में घटित हो रही घटनाओं, समस्याओं, और दैनिक तनाव का सामान्य स्तर शामिल होता है। मिजाज की बदलाव एक सामान्य मानसिक प्रतिक्रिया हो सकती है जब आप खुशी या दुख महसूस करते हैं। इसके पीछे कई कारण हो सकते हैं, जैसे कि भावनाएं, व्यक्तिगत तथा सामाजिक संबंध, आपके भौतिक तथा मानसिक स्वास्…
दूसरों की तुलना में मुझमें धैर्य खोने की अधिक संभावना है, और जब मैं छोटे-छोटे काम करता हूं तो मैं अनावश्यक रूप से उदास और सीमा तक धकेला हुआ महसूस करता हूं	यह एक आम स्थिति हो सकती है और आपका अनुभव हो सकता है कि आप छोटे-छोटे कामों के दौरान थक जाते हैं और उदास महसूस करते हैं. इस समस्या को सुलझाने के लिए, आपको धैर्य और सीमा से बाहर निकलकर बातचीत और सहयोग की आवश्यकता होगी. आपको यह याद रखना चाहिए कि हर कैरियर में समस्याएं और चुनौतियाँ आती हैं और आप मेहनत और समय के साथ यह सीखेंगे कि इन्हें कैसे प्रबंधित करें. धैर्य और सक्रियता बढ़ाने के लिए, आप संगठन और ए…
जब भी मैं डॉक्टर के पास जाने या मनोवैज्ञानिक से परामर्श लेने के बारे में सोचता हूं, मुझे डर और असुरक्षा महसूस होती है। मुझे चिंता है कि मेरी समस्याएं उजागर हो जाएंगी और दूसरे लोग उनका मूल्यांकन करेंगे। यह डर मुझे मदद मांगने से रोकता है।	यह सामान्य है कि दूसरों के सामान्य मूल्यांकन की चिंता हमें प्रभावित कर सकती है, लेकिन यह महत्वपूर्ण है कि हम अपनी स्वास्थ्य और वेलबीइंग के लिए सही देखभाल प्राप्त करें। यह डर कसरत करेगा और आपकी समस्या का समाधान स्थापित करते वक्त आपकी मदद करने वाले पेशेवर के लिए महत्वपूर्ण होता है। यदि आपने डॉक्टर के पास पहले कभी नहीं जाया है, तो इसमें कुछ नयापन और अनजानेपन होगा। परंतु मनोवैज्ञानिक से परामर्श लेने …
मैंने कार्यस्थल पर बहुत सी असफलताओं और अन्याय का सामना किया है, जिससे मैं अपने जीवन में बहुत निराश और निराश महसूस करता हूँ	मैं समझता हूँ कि ऐसे समय में निराश होना काफी सामान्य हो सकता है। इसके लिए आपकी भावनाएं बिलकुल सही हैं। लेकिन यह महत्वपूर्ण है कि आप इसके बावजूद मेहनत और समर्पण जारी रखें क्योंकि सफलता के लिए असफलताएं भी एक महत्वपूर्ण अवसर होते हैं। यहां कुछ सुझाव हैं जो आपको मदद कर सकते हैं: 1. सकारात्मक सोच विकसित करें: अपने मन को सकारात्मक और आपूर्तिपूर्ण विचारों के साथ भरें। संभवतः आपके मन में नकारात्मक सोच और…
मेरे सहपाठियों द्वारा मेरे साथ भेदभाव किया गया था, और कभी-कभी मुझे लगता है कि जीवन व्यर्थ है	मैं समझता हूँ कि ऐसा महसूस करना कठिन हो सकता है जब आपके सहपाठी आपके साथ भेदभाव करते हैं। यह अस्वाभाविक और दुःखद हो सकता है। हालांकि, जीवन कभी-कभी चुनौतियों का सामना करने के लिए होता है और ऐसे समय में आपको निरंतर मेहनत और संघर्ष करने की आवश्यकता होती है। यदि आपको ऐसा लगता है कि जीवन व्यर्थ हो रहा है, तो एक दूसरी दृष्टि से सोचने की कोशिश करें। शायद आप के जीवन में कुछ ऐसे अनुभव और साथियों के लिए मूल…
मैं अपने शरीर और शक्ल-रंग से बहुत असंतुष्ट हूं, और मैं हमेशा स्वयं की अत्यधिक आलोचना और इनकार करता हूं, जो मेरे दैनिक जिंदगी और सामाजिक गतिविधियों को भी प्रभावित करता है	यह सामान्य है कि हम स्वयं की खुदराई करें और अपने बारे में विचार करें। हालांकि, यह आपकी स्वस्थ मानसिकता और संतुलन पर असर डाल सकता है। यदि यह स्थिति आपके लिए चिंता का कारण बन गई है, तो मैं आपको कुछ सुझाव देना चाहूंगा: 1. सकारात्मक सोच: अपने लिए सकारात्मक चिंतन की दिशा में काम करने का प्रयास करें। अपने गुणों, सफलताओं और आपकी अद्यतन लिस्ट पर ध्यान केंद्रित करें। 2. स्वस्थ जीवनशैली: आपकी शारीरिक और मा…
हाल ही में मैं अक्सर थका हुआ और कमजोर महसूस करता हूं, यहां तक कि सीढ़ियां चढ़ना भी थका देने वाला होता है, क्या मुझे डॉक्टर को दिखाना चाहिए	यदि आपको अक्सर थकान और कमजोरी महसूस होती है तो यह बात गंभीर हो सकती है। इसलिए, मेरा सुझाव है कि आप एक डॉक्टर से मिलें और अपनी स्थिति को जांचबाट करें। वे आपके लक्षणों का पता लगा सकेंगे और मार्गदर्शन देंगे कि क्या कारण हो सकता है और उचित उपचार क्या हो सकता है। सभी स्वास्थ्यपेशेवर व्यक्ति से सलाह लेना बेहद महत्वपूर्ण होता है।
मुझे लगता है कि मैं अपनी भावनाओं और व्यवहार को नियंत्रित नहीं कर सकता और अक्सर आवेगी निर्णय लेता हूं, क्या यह एक मानसिक बीमारी है? इसका इलाज कैसे करें?	यदि आपको ऐसा लगता है कि आप अपनी भावनाओं और व्यवहार को नियंत्रित नहीं कर सकते और आप निरंतर आवेगी निर्णय लेते हैं, तो इसका कारण मानसिक स्वास्थ्य में समस्या हो सकती है। इसे अक्सर नियंत्रणहीन व्यावहारिक व्यक्तित्व बिमारी (Impulse Control Disorder) के रूप में जाना जाता है। इस समस्या का इलाज करवाने के लिए आपको मानसिक स्वास्थ्य विशेषज्ञ जैसे कि प्रोफेशनल काउंसलर या प्साइकिएट्रिस्ट की सलाह लेना चाहिए। वे…
मेरे दिल की तह में सभी नकारात्मक भावनाओं को दबा दें, अपने आप को थोड़ा कमजोर न होने दें, लेकिन मैं खुद को संयमित नहीं कर सकता	यह समझना महत्वपूर्ण है कि हम सभी अकसर अपनी मनोदशा में नकारात्मक भावनाओं का सामना करते हैं। यह प्राकृतिक है और हमें लगातार खुद को संयमित रखने की जरूरत होती है। यहां कुछ विचारों की साझा की गई हैं जिनकी मदद से आप अपनी मनोदशा को प्रभावित कर सकते हैं: 1. स्वस्थ मनोरंजन: अपने स्वेच्छानुसार वाणिज्यिक मनोरंजन सामग्री चुनें और सकारात्मक और ज्ञानवर्धक कार्यक्रमों में शामिल हों। इससे आपका मन आकर्षक और सकारा…
हम हर समय लड़ते रहे और हर बार हमारे पास कुछ दर्दनाक शब्द थे और हम टूट गए	ये बहुत दुखद है कि आप और आपका साथी हर समय लड़ते रहते हैं और यह आपको टूटने पर ले जाता है। पारिवारिक विवादों और टकराव के संबंध में मैं ऐसे कुछ सुझाव दे सकती हूँ: 1. संवेदनशीलता और समझदारी दिखाएं: आप अपना व्यक्तिगत तालमेल कैसे बेहतर बना सकते हैं इस पर विचार करें। दूसरे की भावनाओं और मतों का सम्मान करना मुख्य होता है, और सही समय पर पेश आप दोनों के बीच कमजोर बिंदुओं को हल करने के लिए इस्तेमाल किया जा …
सड़क पर चलते हुए, जिओ झांग को हमेशा लगता था कि उसके आसपास के लोग उसे ताक रहे हैं, और उसकी मानसिक स्थिति अधिक से अधिक अस्थिर हो गई थी	यदि जियो झांग को लगता है कि उसके आसपास के लोग उसे ताक रहे हैं और उसकी मानसिक स्थिति अस्थिर हो रही है, तो यह कुछ तरीके हो सकते हैं जिनसे उसे सहायता मिल सकती है: 1. स्थानांतरण करें: यदि जियो को लगता है कि उसके आसपास के लोग उसे ताक रहे हैं, तो वह एक और स्थान पर रहने की सोच सकते हैं जहां उसे आत्मीयता और शांति मिल सके। एक नए मकान की तलाश करने और ऐसे जगह को खोजने में स्थानीय रियल एस्टेट एजेंट के साथ सं…
मुझे ऐसा लगता है कि मुझे अपने रिश्तों में समस्या हो रही है। अपने दोस्तों, परिवार, सहकर्मियों के साथ संवाद करना और संवाद करना कठिन है, और कभी-कभी संघर्ष और बहस भी होती है। इससे मुझे बहुत निराशा और असहाय महसूस होता है और मुझे नहीं पता कि स्वस्थ रिश्ते बनाने के लिए क्या करना चाहिए	रिश्तों में समस्याएं होना सामान्य है, लेकिन इन्हें हल करने के लिए कुछ कदम आपकी सहायता कर सकते हैं। यहां कुछ सुझाव हैं जो आपको स्वस्थ और प्रभावी रिश्तों की ओर ले जाने में मदद कर सकते हैं: 1. ध्यान दें: रिश्तों को बनाए रखने के लिए विशेष मायने रखें। सांत्वना और समझदारी के साथ अपने अन्य व्यक्तियों के बारे में सुनें और उन्हें सुनाएं। 2. संवाद बढ़ाएं: खुले मन से बातचीत करने का प्रयास करें। बातचीत में स…
मैं अपने दिखने और अपने शरीर से असंतुष्ट था, और लगातार आत्म-निर्णय और आत्म-संदेह कर रहा था, जिसने मुझे कम आत्मविश्वास और आत्म-सम्मान के साथ छोड़ दिया।	मैं बिलकुल समझता हूँ कि यदि हम अपने दिखने या शरीर से असंतुष्ट हैं, तो यह हमारे आत्मविश्वास और आत्म-सम्मान पर असर डाल सकता है। लेकिन यह मेरे पास कुछ सुझाव हैं जिन्हें आप आजमा सकते हैं: 1. सकारात्मक विचार - आपकी सोच और मनोवृत्ति आपके दिखने और शरीर के साथ संबंधित होती है। आपको सकारात्मक विचार करने और खुद को स्वीकार करने की कोशिश करनी चाहिए। अपने गुणों, योग्यताओं और उपलब्धियों को ध्यान में रखें और खु…
मैं अक्सर अकेला और असहाय महसूस करता हूँ, जैसे कि वास्तव में कोई मुझे समझता ही नहीं है, और मुझे लोगों से जुड़ने में कठिनाई होती है, जो मुझे परेशान करता है और समाधान खोजना कठिन बनाता है	मुझे खेद है कि आप ऐसा महसूस कर रहे हैं। यह आपके लिए कठिन हो सकता है, लेकिन इसका हल मौजूद है। यहां कुछ सुझाव हैं जो आपकी मदद कर सकते हैं: 1. सपोर्ट सिस्टम ढूंढें: अगर आपको लगता है कि कोई आपको समझ नहीं रहा है, तो एक सपोर्ट सिस्टम ढूंढें। यह सिस्टम हो सकता है आपके परिवार, मित्र, शिक्षक, या एक पेशेवर साथी जो आपके समर्थन में हो सकते हैं। 2. अपने आस-पास संपर्क बढ़ाएँ: आपको अकेला महसूस करने की समस्या हो…
मेरे माता-पिता के तलाक के बाद, मैं अपनी दादी के घर में रह रहा हूं। हालांकि मैं अपनी मां के साथ रहता हूं, मुझे हमेशा लगता है कि वह मेरी दादी से अजनबी है, और मुझे नहीं पता कि उसके साथ कैसे संवाद करना है।	यह सामान्य है कि आपको अपनी मां के साथ रहने के बावजूद दादी से अपने आप को अजनबी महसूस कर रहे हैं। ऐसा होना सामान्य है, परंतु इस मायने में आपको कुछ संवाद तकनीकें आवश्यक हो सकती हैं। यहां कुछ उपाय हैं जिनसे आप अपनी दादी तक पहुंच सकते हैं: 1. खुले मन से बातचीत करें: इस स्थिति को अच्छी तरह से समझें और खुले मन से अपनी दादी से बातचीत करें। इसे एक संवादित मंच के रूप में देखें जहां आप उनसे अपनी मुद्दत अनुभ…
मेरे पास सफलताओं की तुलना में अधिक असफलताएं हैं, और अधिक से अधिक बार मैं खुद को दिलासा देता हूं कि जब तक मैं कड़ी मेहनत करता हूं, पुरस्कार मिलेंगे, लेकिन वास्तविकता अक्सर निराशाजनक होती है	देखने के लिए यह बहुत प्रशंसनीय है कि आप कठिनाइयों के बावजूद खुद को प्रोत्साहित करते हैं। एक मनोतेरपी के रूप में, मैं आपको खुद के संग्रह को देखने के लिए संबोधित करने की सलाह दूंगा। वैसे तो हम सभी किसी न किसी समय असफलता का सामना करते हैं, लेकिन यदि आपके साथ यह बार-बार होता है, तो इसका कुछ कारण हो सकता है। यहां कुछ सुझाव हैं जो आपको मदद कर सकते हैं: 1. स्वयं के लक्ष्यों और प्रत्याशाओं को समीक्षा करे…
मुझे डर की तीव्र भावना है कि कुछ होगा और मैं अपने आप को शांत नहीं कर सकता	डर की भावना सामान्य हो सकती है, और इसे नियंत्रित करना मुश्किल हो सकता है। लेकिन आप कुछ कार्रवाई लेकर इसमें सहायता कर सकते हैं। यहां कुछ सुझाव हैं: 1. सामरिक अभ्यास करें: जीवन में नियंत्रित डर को कम करने के लिए अभ्यास करें, जैसे कि ध्यानाभ्यास, योग, या गहरी सांस लेना। ये तकनीकें आपकी भावना को नियंत्रित करके आपको शांति देने में मदद कर सकती हैं। 2. अन्याय से नजदीक रहें: सोचों या गतिविधियों को छोड़कर…
मुझे ऐसा लगता है कि मैं लगातार भ्रम की स्थिति में हूं, मुझे नहीं पता कि मैं क्या चाहता हूं या मुझे क्या करना चाहिए, और यह बहुत परेशान करने वाला है और कभी-कभी कुछ नकारात्मक भावनाओं को जन्म दे सकता है।	इससे बहुत सारे लोगों को गुजरता है और यह सामान्य है। यह आपके भी लिए आवश्यक नहीं है कि आप अपनी जिंदगी में निरंतर चरम परखों और उचित निर्णय लें। इसे अवसाद, चिंता या स्वार्थ की एक सामान्य अवस्था माना जाता है। नीचे दिए गए कुछ सुझाव को ध्यान से पढ़ें और आवश्यकतानुसार उन्हें अपनाएं: 1. अपनी सामरिक और आत्मिक स्थिति का पता लगाएं: ध्यान दें कि आपकी मानसिक स्थिति क्या है और आप इसे कैसे प्रभावित कर सकते हैं। …
कभी-कभी उदास महसूस करते हैं, और नकारात्मक भावनाओं से बाहर निकलना मुश्किल होता है, मैं अपनी मानसिकता को कैसे समायोजित कर सकता हूँ?	यदि आप कभी-कभी उदास महसूस करते हैं और यह आपके लिए मुश्किल होता है कि नकारात्मकता से बाहर निकलें, तो निम्नलिखित कुछ सुझाव आपकी मानसिकता को संतुलित करने में मदद कर सकते हैं: 1. स्वस्थ जीवनशैली अपनाएं: नियमित रूप से व्यायाम करना, पर्याप्त नींद लेना, स्वस्थ भोजन खाना और तनाव कम करने के लिए ध्यान योग आदि करना आपकी मानसिक स्थिति को सुधारने में मदद कर सकता है। 2. सबाथ लें: अपने आपको संयमित करें और विश्र…
मुझे हमेशा लगता है कि मैं काफी अच्छा नहीं हूं, काफी स्मार्ट नहीं हूं, काफी सुंदर नहीं हूं, और मैं अक्सर दूसरों को मेरी कमियों को देखने से रोकने के लिए खुद को पूरी तरह से पैकेज करना चाहता हूं।	यह प्रतिबंधाने की बात कहने से पहले, यह महत्वपूर्ण है कि आप खुद को स्वीकारें और स्वीकारें कि आप कितने अद्यतन हैं। हर किसी को कोई न कोई कमी और निर्माणशील क्षमताएं होती हैं, लेकिन इसका मतलब नहीं है कि आप कुछ नहीं हैं। आपका मूल्य और व्यक्तित्व सिर्फ ऐसे ही मायने नहीं रखते हैं। यदि आप किसी विशेष क्षेत्र में खुद को अभिवृद्धि करना चाहते हैं, तो पहले इसे पहचानने का प्रयास करें कि आप किस तरह से सुधार कर स…
मैं अक्सर अपने अंदर खालीपन महसूस करता हूँ, अपनेपन और उद्देश्य की सच्ची भावना का अभाव	खालीपन और अपनेपन की भावना को सुलझाने के लिए कुछ तरीके हैं। 1. अपने स्वास्थ्य का ध्यान रखें: स्वस्थ शरीर और दिमाग में स्वस्थ आहार, पर्याप्त नींद, और नियमित व्यायाम करना महत्वपूर्ण है। यह खालीपन से बचने और सकारात्मक भावना को उत्पन्न करने में मदद कर सकता है। 2. दिनचर्या में उद्धरण और प्रेरणादायक कार्य को शामिल करें: यदि आप अपनेपन की भावना को बढ़ाना चाहते हैं, तो दिनचर्या में प्रेरणादायक कार्य, सुनहर…
जब भी कोई मुझ पर हमला करता है या मेरी तारीफ करता है, मुझे हमेशा ऐसा लगता है कि वे मुझे धोखा दे रहे हैं क्योंकि मैं सम्मान के लायक नहीं हूं	यह आपकी अवगुण्ठना की एक प्रकार हो सकती है, जिसे "स्वदोषविचार" कहा जाता है। इसमें व्यक्ति को अपनी मान्यताओं और योग्यताओं का पूर्वाग्रह होता है। यह मानसिकता व्यक्ति को नकारात्मक रूप से प्रभावित कर सकती है, और स्वाभाविक रूप से मानसिक और आत्मिक स्वास्थ्य को प्रभावित करती है। यदि आपको ऐसा लगता है कि आप धोखा दिये जा रहे हैं या आप सम्मान के लायक नहीं हैं, तो यह मायने रखता है कि आपका आत्मविश्वास कम हो सक…
मुझे इस बात की चिंता है कि दूसरों द्वारा मेरी आलोचना की जाएगी और मुझे नकारा जाएगा, जिससे मेरा आत्मविश्वास कम होता जाएगा।मैं अपने आत्मविश्वास को कैसे सुधार सकता हूं?	यदि आपको दूसरों द्वारा आलोचना करने एवं नकारने का डर है और इससे आपका आत्मविश्वास नीचे जा रहा है, तो निम्नलिखित कुछ उपाय आपकी मदद कर सकते हैं: 1. संरक्षण के लिए अपने आसपास सकारात्मक लोगों की खोज करें: उन लोगों को ढूंढें जो आपकी प्रशंसा, समर्थन और सकारात्मक प्रभाव करने में आपकी मदद कर सकते हैं। एक प्रोफेशनल मेंटर, कोच या विशेषज्ञ से संपर्क करने का विचार भी अच्छा हो सकता है। 2. अपनी सक्षमताओं और योग्…
मुझे नहीं पता कि मैं अपनी भावनाओं से कैसे निपटूं। मैं अक्सर छोटी-छोटी बातों के कारण विस्फोट कर देता हूं। मुझे लगता है कि मैं अपनी भावनाओं को नियंत्रित नहीं कर सकता। क्या इसका मतलब यह है कि मुझे मनोवैज्ञानिक समस्या है?	बिना पेशेवर सलाह के, मैं आपको आरामसे बता सकता हूँ कि यह निश्चित रूप से मनोवैज्ञानिक समस्या हो सकती है। भावनाएं नियंत्रित करना और अपने प्रतिक्रियाओं को नियंत्रित करना कठिन हो सकता है, लेकिन यह संभव है और इसके लिए संजीवनी मार्ग उपलब्ध है। अपनी भावनाओं को स्वयं नियंत्रित करने के लिए, इसे सीखना और सुधार करना अपूर्ण हो सकती है। यहां कुछ सामान्य सुझाव हैं जो आपकी सहायता कर सकते हैं: 1. स्वाध्याय करें: …
मैं भविष्य के बारे में भय और अनिश्चितता से भरा हुआ हूं, मुझे नहीं पता कि मुझे किस रास्ते पर जाना चाहिए, मैं हर दिन बहुत खोया हुआ महसूस करता हूं	भविष्य के बारे में चिंतित होना और अनिश्चितता के अनुभव सामान्य हैं। यह शायद हम सभी ने किसी न किसी समय पर अनुभव किया होगा। हालांकि, हम जीवन में निर्धारित रास्तों द्वारा तर्कसंगत और सामर्थिक रिस्ते बना सकते हैं ताकि हम अपने लक्ष्यों को प्राप्त कर सकें। यहां कुछ सुझाव हैं: 1. ध्यान से सोचें और रचनात्मक उत्पादन करें: आपको अपने मन के साथ मेल खाना आवश्यक है। निरंतर चिंता करने की बजाय, एक दैनिक क्रिया यो…
मुझे हमेशा से जुनूनी बाध्यकारी विकार रहा है। मुझे बार-बार जांच करनी पड़ती है कि क्या दरवाजे और खिड़कियां बंद हैं, क्या बिजली के उपकरण बंद हैं, आदि। अगर मैं इन मांगों को पूरा नहीं कर सकता, तो मुझे बहुत बेचैनी और डर महसूस होगा। इसका असर मेरी रोजमर्रा की जिंदगी और काम पर पड़ रहा है।' मैं जानना चाहता हूं कि इस परेशानी से कैसे छुटकारा पाया जाए.	इस तरह की चिंता और डर आपकी जीवन और कार्यक्षेत्र पर नकारात्मक प्रभाव डाल सकते हैं। यहां कुछ सुझाव हैं जो आपको इस परेशानी से छुटकारा पाने में मदद कर सकते हैं: 1. ध्यानाभ्यास करें: ध्यान के अभ्यास करना आपको मन को नियंत्रित करने और अन्तरंग शांति और सकारात्मकता का अनुभव करने में मदद कर सकता है। इसे दैनिक अभ्यास के रूप में शामिल करें। 2. योग और प्राणायाम: योग और प्राणायाम करने से मन को शांति मिलती है औ…
कभी-कभी मैं ऊब महसूस करता हूं, मुझे नहीं पता कि मुझे क्या करना है, और मुझे नहीं पता कि भविष्य में मेरे लिए क्या है, और मैं खाली महसूस करता हूं।	यह आम बात है कि हम सभी कभी-कभी ऐसा महसूस करते हैं। आपकी स्थिति के लिए कुछ सुझाव देने के लिए, मैं आपको कुछ उपाय बता सकता हूं: 1. ध्यान केंद्रित करें: अपने दिमाग को शांत रखने के लिए ध्यान करने की कोशिश करें। ध्यान करने के लिए आप मन की शांति, सुख और स्थिरता को बढ़ा सकते हैं। 2. विश्राम करें: अपने शरीर के लिए समय निकालें और आराम करें। योग या मेडिटेशन करने की कोशिश करें जिससे आपके स्वास्थ्य और मानसिक …
मैं हमेशा एक बच्चा पैदा करना चाहती थी, लेकिन जब मैं गर्भवती थी, तो मुझे हमेशा लगता था कि मैं एक अच्छी मां बनने के लायक नहीं हूं	आपका ख्याल रखने के लिए आपको धन्यवाद। मातृत्व एक स्वतंत्र और अद्वितीय अनुभव होता है, और हर माता का अपना तरीका होता है। अगर आपको लगता है कि आप एक अच्छी मां नहीं बन सकती हैं, तो इसे बातचीत किए बिना स्वीकार न करें। यह आपके अंदर की आपकी संवेदनशीलता और सोच का परिणाम हो सकता है। बच्चे पैदा करने के लिए मातृत्व की जहां परिभाषाएं होती हैं, वहां उम्मीदें होती हैं। आप मातृत्व के लिए तत्पर हैं, और यह महत्वपूर…
मैं हमेशा अपने शरीर और स्वास्थ्य को लेकर चिंतित रहता था, इस डर से कि मुझे कई तरह की बीमारियाँ न हो जाएँ, जिससे मैं बहुत घबराया हुआ और चिंतित महसूस करता था।	यह सामान्य है कि हम सभी अपने स्वास्थ्य के बारे में चिंतित होते हैं। यह छोटी-छोटी चिंताएँ हमारी दैनिक जीवन शैली और आहार हमेशा स्वस्थ रखने के लिए महत्वपूर्ण हैं। यदि आप चिंतित होना बंद करना चाहते हैं, तो कुछ उपायों को लागू कर सकते हैं। 1. नियमित व्यायाम करें: व्यायाम आपके शरीर को मजबूत और स्वस्थ रखने में मदद करता है। रोजाना योग, ध्यान या व्यायाम करने की आदत डालें। 2. सही आहार को भोजन करें: संतुलित …
मैं अपनी उपस्थिति और आकृति के बारे में बहुत आत्म-जागरूक और चुनिन्दा हूं, और मैं अक्सर एक तरह के अंतहीन आत्म-सुधार और परिवर्तन में फंस जाता हूं	यदि आप अपनी उपस्थिति और आकृति के संबंध में आत्म-जागरूक हैं और अंतहीन आत्म-सुधार और परिवर्तन करने के बारे में बात कर रहे हैं, तो मैं आपको कुछ सुझाव दे सकता हूं: 1. सेल्फ रिफ्लेक्शन: रोज अपने आप को समय देने और अपने विचारों, भावनाओं और कृतियों का मूल्यांकन करने का प्रयास करें। यह आपको अपने प्रभावशील एवं जीवन में नए परिवर्तन करने के लिए मदद करेगा। 2. स्वास्थ्य और पोषण: अपनी शारीरिक और मानसिक स्वास्थ्…
सीखने की अक्षमता आम है और आप इसे खेल की तरह मानकर सीखने को और मज़ेदार बना सकते हैं	आप बिल्कुल सही कह रहे हैं! सीखने को खेल की तरह मानना बहुत मजेदार हो सकता है और यह आपके ज्ञान और अनुभव को भी बढ़ा सकता है। कोशिश करें कि सीखने की प्रक्रिया को रोचक और जोशीला बनाएं, जैसे एक खेल को कौशल सीखने की छलांग में बदल दें। आप नए कौशल के प्रयास में अवतार बन सकते हैं, स्कोर बना सकते हैं और दोस्तों के साथ रिवाइंड और हांगआउट कर सकते हैं। साथ ही, अपने सीखने के लक्ष्य पर ध्यान केंद्रित करें और उन्…
मैं स्पष्ट रूप से किसी पर भरोसा करना चाहता हूं, लेकिन मुझे नहीं पता कि इसे कैसे प्राप्त किया जाए। हर बार जब मैं कोशिश करता हूं, तो मैं असफल हो जाता हूं, और फिर मैं अपना साहस खो देता हूं और मूल बिंदु पर वापस चला जाता हूं।	इस्तेमालकर्ता, किसी पर भरोसा करना एक बड़ी और महत्वपूर्ण चीज हो सकती है। यदि आप हर बार असफल हो रहे हैं और अपना साहस खो रहे हैं, तो यहां कुछ सुझाव हैं जो आपको मदद कर सकते हैं: 1. इतनी जल्दी हार न मानें: कभी-कभी हम इतनी जल्दी थक जाते हैं और हार मान लेते हैं कि हमारा मन बंद हो जाता है। आपको स्थिर रहकर समस्या का सामना करना चाहिए। 2. गलतियों से सीखें: हम सीखते हैं जब हम गलतियों से अनुभव प्राप्त करते है…
मुझे लगता है कि चीजों के लिए मेरी रुचि और उत्साह कम और कम होता जा रहा है, और मैं हमेशा कुछ भी करने के लिए कम प्रेरित महसूस करता हूं। क्या यह एक मानसिक स्वास्थ्य समस्या है?	हाँ, ऐसा हो सकता है कि यह एक मानसिक स्वास्थ्य समस्या हो। आपकी रुचि और उत्साह कम हो रही होने के कई कारण हो सकते हैं, जिनमें से कुछ आपके मनोवैज्ञानिक स्वास्थ्य को दर्शाते हैं। यह अनुकूलन प्रतिक्रिया, मानसिक तनाव, डिप्रेशन, या अन्य मानसिक समस्याओं के लक्षण हो सकते हैं। यदि आपको लगता है कि यह समस्या आपके दैनिक जीवन को प्रभावित कर रही है, तो आपको एक मानसिक स्वास्थ्य विशेषज्ञ से सलाह लेना चाहिए। विशेषज…
नियमित मनोवैज्ञानिक दबाव हमारी भावनात्मक स्थिरता को प्रभावित करेगा, हमारे शारीरिक स्वास्थ्य को प्रभावित कर सकता है, हमें मनोवैज्ञानिक गुणवत्ता, मानसिक स्वास्थ्य शिक्षा के विकास में अच्छा काम करना चाहिए	आप बिल्कुल सही कह रहे हैं! नियमित मनोवैज्ञानिक दबाव आपकी भावनात्मक स्थिरता को प्रभावित कर सकता है, क्योंकि यह आपको तंदुरुस्त और स्थिर रखता है. इसके अलावा, इसका सीधा प्रभाव आपके शारीरिक स्वास्थ्य पर भी पड़ सकता है, क्योंकि मानसिक स्वास्थ्य शारीरिक स्वास्थ्य के लिए महत्वपूर्ण होता है. मनोवैज्ञानिक गुणवत्ता और मानसिक स्वास्थ्य शिक्षा का विकास, हमें स्वस्थ मन:शारीरिक जीवन जीने में मदद कर सकता है. इसल…
मुझे एक रात के लिए अवैध रूप से हिरासत में लिया गया था, कमजोरी की हद तक प्रताड़ित किया गया था, एक कोने में अकेले रोते हुए, केवल आँसू ने अंधेरे को रोशन किया	मुझे बहुत दुःख है कि आपको ऐसा अनुभव करना पड़ा। इस तरह की स्थिति में, मेरा सर्वोत्तम सुझाव है कि आप एक वकील से संपर्क करें और कानूनी सहायता लें। वे आपको अवैध हिरासत के खिलाफ कानूनी कार्रवाई करने में मदद कर सकते हैं। आपकी सुरक्षा और आपके अधिकारों की संरक्षा के लिए अपने घरवालों या पुलिस को भी सूचित करें। यदि आपको मानसिक सहायता की आवश्यकता होती है, तो आप एक मानसिक स्वास्थ्य पेशेवर से मिलें जो आपकी मद…
किशोरावस्था के मानसिक स्वास्थ्य के संदर्भ में, यह सीखना बहुत महत्वपूर्ण है कि एक स्वस्थ संबंध कैसे स्थापित किया जाए और अपनी भावनाओं और मांगों को सही तरीके से कैसे व्यक्त किया जाए।	किशोरों के मानसिक स्वास्थ्य को संभालना एक महत्वपूर्ण विषय है। इस अवस्था में, स्वस्थ संबंधों को स्थापित करना और भावनाओं और मांगों को सही ढंग से व्यक्त करना अद्यापक होता है। एक स्वस्थ संबंध स्थापित करने के लिए, विश्वास, संवेदनशीलता और सहयोग बहुत महत्वपूर्ण हैं। यह महत्वपूर्ण है कि आप एक-दूसरे की सुनें और समझें, आपसी संबंध मजबूत करें और सहयोग करें। स्वस्थ संबंधों में विश्वास और समझ एक महत्वपूर्ण भूम…
हाल ही में मुझे बुरे सपने बहुत आ रहे हैं, और ये सपने मुझे भयभीत और असहज महसूस कराते हैं, और यहां तक कि मेरी नींद की गुणवत्ता और दैनिक जीवन को भी प्रभावित करते हैं।	बुरे सपने पाना आम बात है और यह आपके मानसिक स्थिति को प्रभावित कर सकता है। यहां कुछ सुझाव हैं जो आपकी मदद कर सकते हैं: 1. ध्यान दें कि आपका वातावरण निर्यात करने के लिए सुरक्षित हो: सोने से पहले, कोशिश करें कि आपका कमरा शांत और शांतिपूर्ण हो जाए। ऊर्जा बचाने के लिए मोबाइल फोन और टेलीविजन से दूर रहने की कोशिश करें। 2. आपकी आदतों को सुधारें: एक नियमित और स्वस्थ पारंपरिक आदत विकसित करने का प्रयास करें…
मैं हमेशा चिंतित रहता हूं और लगातार इस बात को लेकर चिंतित रहता हूं कि चीजें कैसी चल रही हैं, विशेष रूप से छोटी चीजें भी मुझे असहज और असहज महसूस करा सकती हैं	यह सामान्य है कि हम सभी समय-समय पर चिंतित और चिंताजनक महसूस करते हैं। लेकिन, यह महत्वपूर्ण है कि हम इस चिंता को नियंत्रित करें और सकारात्मक सोच को बढ़ावा दें। यहां कुछ सुझाव हैं जिन्हें आप अपने चिंताओं को कम करने के लिए आजमा सकते हैं: 1. ध्यान और मनोयोग: ध्यान और ध्यानाभ्यास करके आप अपने मन को स्थिर और शांत कर सकते हैं, जो चिंताओं को कम करने में मदद करता है। आप योग या मेडिटेशन कर सकते हैं या फिर …
मैं खुद को नकारात्मक विचार सोचने से नहीं रोक सकता। कभी-कभी जब चीज़ें इतनी बुरी नहीं होतीं, तब भी मैं सबसे बुरा ही सोचता हूँ। मैं बहुत उदास और असहाय महसूस करता हूं और ऐसा लगता है कि मैं कभी भी इससे बाहर नहीं निकल पाऊंगा।	समय-समय पर, हम सभी नकारात्मक या खुद को घटिया विचार सोचने का अनुभव करते हैं। हालांकि, यह स्थिति सामान्य है और सभी के साथ होती है। इससे परिणामस्वरूप हम उदास और असहाय महसूस कर सकते हैं। यदि आप खुद को नकारात्मक विचार सोचते हुए पाते हैं, तो इससे निपटने के लिए कुछ विचारशील कदम उठा सकते हैं। निम्नलिखित चीजें आपकी सहायता कर सकती हैं: 1. अवधारणात्मक बदलाव: नकारात्मक विचार से निपटने के लिए, आपको अपने मन को…
मुझे ऐसा लगता है कि मेरा जीवन उबाऊ है और उसमें जुनून और प्रेरणा की कमी है, जिससे मैं उदास और खोया हुआ महसूस करता हूं	यह सामान्य है कि हमारे जीवन में कभी-कभी ऐसे समय आते हैं जब हमें उबाऊ होने और प्रेरित होने की कमी महसूस होती है। खोया हुआ महसूस करने की इस स्थिति में, निम्नलिखित कुछ सरल उपाय आपकी मदद कर सकते हैं: 1. अपने लक्ष्यों और सपनों को पुनः सोचें: ईमानदारी से अपने लक्ष्यों और सपनों को देखें और महसूस करें कि वे आपके जीवन को कैसे सकारात्मक रूप से प्रभावित कर सकते हैं। 2. आपके रुचियों और रोचकताओं के बारे में स…
मैं अक्सर अनिद्रा से पीड़ित रहता हूं, रात में बिस्तर पर लेटकर काम, परिवार के कामों और रिश्तों के बारे में सोचता हूं, जिससे मैं दिन में ध्यान केंद्रित नहीं कर पाता हूं, कार्य क्षमता कम हो जाती है और मेरा मूड बहुत खराब हो जाता है।	यदि आप अनिद्रा से पीड़ित हैं और इसके कारण आपकी कार्य क्षमता पर असर पड़ रहा है, तो आप निम्नलिखित चीजों की जांच कर सकते हैं: 1. नियमित नींद: अच्छी नींद प्राप्त करना आपकी मनःसामरिक और शारीरिक स्वास्थ्य के लिए महत्वपूर्ण है। रात में सही समय पर सोने और उठने का नियमित अनुसरण करें। 2. व्यायाम: योग या साधना सहित नियमित व्यायाम करना, विशेष रूप से रात में, आपको धीरजपूर्वक तनावमुक्त और निद्रालु बना सकता है।…
जब मैं असफलताओं और निराशाओं का सामना करता हूं, तो मुझे लगता है कि सुरक्षित रहने का एकमात्र तरीका सब कुछ भूल जाना है।	अधिकांश लोग किसी न किसी समय असफलता और निराशा का सामना करते हैं, यह जीवन का हिस्सा है। आपकी बातों से यह प्रतीत हो रहा है कि आप अपनी आत्मविश्वास और सुरक्षा खो रहे हैं। पहले बात तो यह जानना है कि असफलता और निराशा हमें अवश्य भांति से प्रभावित कर सकती हैं, लेकिन इनका मतलब नहीं होता कि हमें सब कुछ भूल जाना चाहिए। यह समझदार नहीं होता है और हमें बिना सोचे समझे कदम उठाने के बजाय समस्याओं का सामना करना पड़…
मैं अक्सर थकान और कमजोरी महसूस करता हूं, भले ही मैंने ज्यादा शारीरिक काम न किया हो। मुझे बार-बार अनिद्रा और नींद न आने की समस्या भी होती है, जिससे मैं बहुत असहज और परेशान महसूस करता हूं	आपकी समस्या देखते हुए, मैं कुछ सुझाव दे सकता हूं: 1. नियमित व्यायाम करें: योगा, सौर या किसी अन्य शारीरिक गतिविधि को नियमित रूप से करने से आपके शरीर की ताकत और ऊर्जा में सुधार हो सकती है। 2. स्वस्थ आहार लें: सम्पूर्ण और पौष्टिक आहार का सेवन करना शरीर को ऊर्जा प्रदान करने में मदद कर सकता है। बालंस डाइट करें जिसमें पोषक तत्व शामिल हों, और खाद्य पदार्थों की अधिक मात्रा से बचें। 3. स्वस्थ नींद का ध्या…
मैं कभी-कभी अवसाद से ग्रस्त हो जाता हूं, सामान्य रूप से नहीं खा सकता, और फिर अपने खाने पर नियंत्रण रखता हूं क्योंकि मुझे डर है कि लोग मुझे पतला होता देख रहे हैं	अवसाद और खाने पर नियंत्रण रखने की चिंता आपके लिए आपत्तिजनक हो सकती है। यह आपके शरीर और मन के लिए प्रभावी और स्वस्थ नहीं हो सकता है। इससे पहले कि इस मामले में कुछ प्रभावी सामरिक मार्गदर्शन दे सकें, मैं आपको यह सुझाव देना चाहूंगा कि आप हेल्दी खानपान और मनोरंजन के लिए प्रयास करें। अगर आपको अवसाद होता है, तो माइंडफुलनेस और मेडिटेशन जैसी तकनीकों का उपयोग करके अपने मानसिक स्वास्थ्य को सुधारने का प्रयास…
मेरे माता-पिता हमेशा मेरी आलोचना करते हैं और मैं जो कुछ भी करता हूं वह पर्याप्त नहीं है, यह मुझे बहुत उदास और निराश महसूस कराता है, मुझे लगता है कि मैं कभी भी उनकी स्वीकृति और प्रशंसा प्राप्त नहीं कर पाऊंगा	यह सामान्य है कि परिवार के सदस्य कभी-कभी आपके साथ आलोचना कर सकते हैं। यह विशेष तौर पर माता-पिता के लिए आपकी आलोचना करना हो सकता है क्योंकि वे आपके सर्वश्रेष्ठ होने की उम्मीद रखते हैं। हालांकि, आपको यह जानने की जरूरत है कि उनकी आलोचना आपके मार्गदर्शन के लिए हो सकती है। यह आपको खुद के और सुधार करने के बारे में सोचने का अवसर देती है। लेकिन यदि आपको इससे अत्यधिक निराशा और उदासीनता हो रही है, तो यह मा…
मेरा रिश्ता हमेशा बहुत अस्थिर रहा है, मैं हमेशा भावनाओं से नियंत्रित रहता हूं, अपने रिश्ते को स्वस्थ तरीके से बनाए रखने में असमर्थ हूं	यह काफी सामान्य समस्या है जो बहुत से लोगों को होती है। मैं आपकी मदद करने के लिए कुछ सुझाव दे सकता हूं: 1. भावनाओं को स्वीकार करें: पहले से ही जानकारी होना सुनिश्चित करें कि आप अपने रिश्ते में किस भावना से प्रभावित हो रहे हैं। भावनाओं को स्वीकार करने के लिए मेंटल हेल्थ और आत्म-संवेदना वाली क्रियाएँ जैसे मेडिटेशन और रिलेक्सेशन तकनीकों का उपयोग कर सकते हैं। 2. संचार बढ़ाएं: अपने भावनाओं और चिंताओं क…
कॉलेज में शाओलिंग को बदमाशी का सामना करना पड़ा, जिसके कारण वह हीन और उदास हो गई। मैं उसके आत्मविश्वास और मानसिक स्वास्थ्य के पुनर्निर्माण में कैसे मदद कर सकता हूं?	आप उस व्यक्ति के आत्मविश्वास और मानसिक स्वास्थ्य के पुनर्निर्माण में निम्नलिखित कदम अपना सकते हैं: 1. समय देने: उस व्यक्ति के साथ समय बिताने और उसे समझने का प्रयास करें। उसे सुनने और उसकी परेशानियों को समझने का प्रयास करें। 2. संवाद स्थापित करें: एक खुली और संवेदनशील माहौल में यूनिवर्सिटी व्यक्ति के लिए माहौल बनाएं। उसके साथ संवाद, विचार और अनुभवों को साझा करें। 3. समर्थन दें: उसे अपने दोस्त, परि…
मेरे पारिवारिक रिश्ते जटिल थे और मैं अक्सर तनावग्रस्त और असुरक्षित रहता था और यह नहीं जानता था कि उनसे कैसे निपटूं या मदद के लिए किसकी मदद लूं।	पारिवारिक मुद्दों का सामना करना कठिन हो सकता है, लेकिन इससे बाहर निकलना भी संभव है। यहां कुछ विचार दिए गए हैं जो आपके लिए मददगार साबित हो सकते हैं: 1. वक्त निकालिए: कई बार हम अपने परिवार के सदस्यों के साथ संबंधों में समस्याएं उत्पन्न होने पर छिप जाते हैं। लेकिन वक्त निकालकर, खुले दिल से बातचीत करने का प्रयास करें। अपने मन की बातें संवेदनशीलता से और सच्चाई के साथ साझा करने का प्रयास करें। 2. विशेष…
मेरा एक दोस्त है जो हमेशा नकारात्मक शिकायत करता है और किसी भी चीज़ के प्रति सकारात्मक दृष्टिकोण नहीं रखता है, मुझे लगता है कि उसकी नकारात्मकता मेरी भावनाओं को प्रभावित करती है, लेकिन मुझे नहीं पता कि उसके साथ कैसे संवाद किया जाए	दोस्त के साथ संवाद करने के लिए कुछ तरीके हैं जो आपको मदद कर सकते हैं: 1. सुनें और समझें: अपने दोस्त की शिकायतों को ध्यान से सुनें और समझें। उनकी बातें पूरी तरह से समझने से आप उनकी भावनाओं को और उनकी सोच को समझ पाएंगे। 2. प्रश्न पूछें: उनसे उनकी नकारात्मक सोच के पीछे कारण जानें। कुछ प्रश्न पूछने के जरिए आप उनके मानसिक स्थिति को समझ सकते हैं और उन्हें सुझाव दे सकते हैं। 3. सकारात्मक और प्रभावशाली ब…
हाल ही में, मैंने पाया कि मुझे हमेशा अनिद्रा होती है, यहां तक कि जब मैं सो जाता हूं, मुझे बुरे सपने आते हैं, और जागने के बाद मुझे भारीपन महसूस होता है, मुझे क्या करना चाहिए?	अनिद्रा अथवा एक अच्छी नींद न पाने की स्थिति, किसी व्यक्ति के जीवन में प्रभाव डाल सकती है। अगर आपको नींद नहीं आ रही है या बुरे सपने आ रहे हैं, तो निम्नलिखित कुछ सुझाव आपकी सहायता कर सकते हैं: 1. नींद का समय और अंतराल: एक नियमित नींद का प्रस्तावित समय और इसे पालन करने से, आपका शरीर और मस्तिष्क एक गति में आता है। इसलिए, शाम को समय पर सोएं और सुबह को जगें। 2. रिलेक्सेशन तकनीकें: सोने के पहले, अपने शर…
कभी-कभी दोस्तों के साथ चैट करते समय मुझे हमेशा लगता है कि बातचीत खत्म हो गई है और कहने के लिए कुछ नहीं है	यह सामान्य है कि बातचीत के दौरान कभी-कभी ऐसा महसूस हो सकता है कि कुछ और कहने के लिए बचा ही नहीं है। इससे आप परेशान न हों, यह एक सामान्य बात है और अधिकतर लोग इसे महसूस करते हैं। आप इस स्थिति को दृढ़ता से देख सकते हैं और बातचीत धीरे-धीरे समाप्त कर सकते हैं। यदि आपको और कुछ कहना हो तो आप एक आंकड़ा, कोई अनुभव या आपके दिनचर्या के बारे में बात कर सकते हैं। इससे आपकी चैट एक नई दिशा में बढ़ सकती है और आप…
मेरे बच्चे को स्कूल में धमकाया जा रहा है और वह अब बहुत अलग हो गया है और मुझे नहीं पता कि उसकी मदद कैसे करूं	यह सुनकर दुख हुआ कि आपके बच्चे को स्कूल में धमकाया जा रहा है। इस तरह के चीज़ें बच्चों के लिए बहुत चिंता का कारण बन सकती हैं और उन्हें परेशान कर सकती हैं। आपको अपने बच्चे की मदद करने के लिए विभिन्न कदम उठाने में मदद कर सकता हूँ: 1. अपने बच्चे के साथ सहयोग करें: अपने बच्चे के साथ बातचीत करें और उन्हें समझने का प्रयास करें। यह उन्हें विश्वास दिलाएगा कि आप उनके साथ हैं और उन्हें सपोर्ट कर रहे हैं। 2.…
जब भी मैं लोगों से संवाद करता हूं, मैं हमेशा बहुत घबराया हुआ महसूस करता हूं। मुझे नहीं पता कि क्या कहना है, और मुझे डर है कि मैं गलत बात कह दूंगा।	यह आम समस्या है और इस पर काम करने के लिए कुछ सुझाव हैं। 1. अपनी तैयारी करें: संवाद से पहले, अपनी तैयारी करें। आप तय कर सकते हैं कि आप किस विषय पर बात करना चाहते हैं और क्या संदेश देना चाहते हैं। जब आप तैयार होंगे, तो आपको किसी अन्य बात के लिए टेंशन नहीं होगी। 2. सवाल पूछें: लोग संवाद में ज्यादातर अपनी बात के बारे में ही सोचते हैं। इसलिए, आप खुद को संवाद में सक्रिय रखने के लिए सवाल पूछ सकते हैं। य…
जब भी मैं अकेला होता हूँ, मुझे एक अकथनीय भय का आभास होने लगता है, अनजाने में एक अदृश्य शक्ति द्वारा नियंत्रित किया जाता है, मैं बंधा हुआ महसूस करता हूँ, एक अभेद्य खोल में फँसा हुआ हूँ, कभी-कभी सब कुछ बहुत डरावना होने वाला है	यह एक गंभीर समस्या प्रतीत होती है। इसके कारण और समाधान के बारे में बात करने से पहले, क्या मैं आपके लिए कुछ सूचना ले सकता हूँ? क्या आपने इस बारे में अपने ज्ञानी के साथ बातचीत की है, जैसे कि किसी सामरिक या मानसिक स्वास्थ्य विशेषज्ञ से?
मैं हमेशा अपने आप पर बहुत सख्त था और मुझे लगता था कि मैं इतना अच्छा नहीं था कि मुझे प्यार और महत्व दिया जा सके	यह सामान्य है कि हम अपने आप पर कठिन और सख्त हो सकते हैं और अपनी खुदरा मूल्यांकन करने में कठिनाई का सामना कर सकते हैं। लेकिन, ऐसा सोचना कि आप इतने अच्छे नहीं हैं जिसके लिए आपको प्यार और महत्व नहीं मिल सकता, यह गलत और अस्वाभाविक है। हर व्यक्ति महत्वपूर्ण है और सभी को प्यार और मान्यता का हकदार होते हैं। यदि आप स्वयं से संबंधित या आत्म-मूल्यांकन में समस्याएं हैं, तो आपको यह जानने के लिए सलाह दी जाती …
मेरा जीवन बस निरंतर हताशा है, मैं चाहे कुछ भी कर लूं, मैं असफल हो जाता हूं, मुझे लगता है कि मैं बेकार हूं	मैं ऐसा सुनकर दुःखी हूँ। हर किसी के जीवन में आंगन बहुत कम कब खिलता है। आपकी हताशा के पीछे कई कारण हों सकते हैं जैसे कि स्वास्थ्य, आत्मविश्वास या परिवार का साथ। हालांकि, आप पाठ्यक्रम में विफलता से हार नहीं मानने की कोशिश कर सकते हैं। यहां कुछ उपाय हैं जो आपकी मदद कर सकते हैं: 1. स्वास्थ्य अवस्था की जांच करें: कई बार स्वास्थ्य समस्याएं हमारे सामरिक और मानसिक तनाव को बढ़ा सकती हैं। अगर आपको लगता है …
मुझे हमेशा धमकाया जाता था, हेय दृष्टि से देखा जाता था, मुझे बेकार, अक्षम महसूस किया जाता था, सामाजिक परिस्थितियों में अपनी असली ताकत और क्षमता दिखाने में असमर्थ, हमेशा एक कोने में छिपा रहता था	यह सुन्दरता है कि आप अपने मन में ऐसे अनुभव कर रहे हों जो आपको परेशानी और असमर्थता का अनुभव कराते हैं। यदि आप इसे परिवर्तित करना चाहते हैं, तो कुछ कदम उठा सकते हैं। 1. अपने आप में विश्वास करें: आपको अपने आप पर विश्वास करना चाहिए। यह मान्यता रखें कि आप में निहित ताकतें, क्षमताएं और संभावनाएं हैं। आपको अपने आप को संदर्भगत शब्दों में प्रशंसा करनी चाहिए और सकारात्मकता के साथ अपने कामों को पूरा करना चा…
मैं भविष्य को लेकर भ्रमित और असहाय महसूस करता हूं, मुझे नहीं पता कि मुझे क्या करना चाहिए, और मुझे नहीं पता कि मुझे क्या चाहिए।	यह एक सामान्य बात है कि हम सभी जीवन में कभी-कभी भविष्य के बारे में परेशान हो सकते हैं। यह वास्तव में एक सामान्य मनोवैज्ञानिक प्रक्रिया है जब हमें अनिश्चय का महसूस होता है और हमे लगता है कि हम नहीं जानते कि क्या होने वाला है। अपने आप को ऐसे समयों में सबसे बड़ा सवाल के रूप में प्रश्न करना सामान्य है। अगर आप इस स्थिति में हैं, तो मेरा सुझाव है कि आप निम्नलिखित कदम अपनाएं: 1. ध्यान केंद्रित करें: ध्य…
मुझे नहीं पता कि मैं हमेशा बहुत ज्यादा क्यों सोचता हूं, भविष्य के बारे में चिंता करता हूं, और हर बार जब मैं बाहर जाता हूं तो दरवाजे को बंद करने और खिड़कियां बंद करने के लिए दोबारा जांच करनी पड़ती है, जिससे मैं बहुत थका हुआ और चिड़चिड़ा महसूस करता हूं	यह दिखता है कि आपको उलझन और चिंता के साथ काफी सामर्थ्य हो सकता है। इस प्रकार के ऊपरी चिंताएं अक्सर अनिश्चितता और नियंत्रण की कमी के कारण होती हैं। यदि आप चिंताएं कम करना चाहते हैं, तो निम्नलिखित सुझावों का पालन कर सकते हैं: 1. जब बाहर जाने के लिए तैयार हो रहे हैं, तो समय से पहले अपने बाग में सभी आवश्यक सामग्री रखें। इससे आपको यकीन होगा कि आप कुछ नहीं भूल रहे हैं और आप तैयार होने के लिए दोबारा जां…
मेरा लंबे समय से यौन उत्पीड़न किया गया है, लेकिन मुझे अभी भी दर्द और परेशानी महसूस हो रही है, मैं इस पिछली चोट से कैसे निपट सकता हूं?	मुझे बहुत दुःख होता है कि आप ऐसे कठिनाईयों से गुजर रहे हैं। वास्तविक यौन उत्पीड़न के मामले में, सबसे महत्वपूर्ण है कि आप खुद को सुरक्षित और स्वस्थ रखें। मेरी सलाह है कि आप निम्नलिखित कार्रवाई उठाएं: 1. सुरक्षित स्थान और समय का चयन करें: अपने आप को सुरक्षित महसूस करने वाले साथी और सुरंगों के बराबर वातावरण को चुनें। यह आपके मन में शक्ति और सहानुभूति पैदा कर सकता है। 2. मानसिक स्वास्थ्य पर ध्यान दें…
मुझे लगा कि मेरे जीवन में अर्थ और उद्देश्य की कमी है, कि मैं वह नहीं पा सका जो मैं वास्तव में करना चाहता था, और खो जाने का यह एहसास बहुत दर्दनाक था।	मुझे बहुत दुःख हुआ यह सुनकर कि आपको अपने जीवन में एक अर्थ और उद्देश्य की कमी महसूस हो रही है। इससे कई लोग प्रभावित होते हैं, लेकिन यह एक साधारण समस्या है और आप इसे हल कर सकते हैं। पहले से यह जानना महत्वपूर्ण होता है कि दृष्टि एवं इंतज़ार बदलना अक्सर संबंधित होता है। आप अपने जीवन में क्या प्राथमिकताएं हैं और क्या प्राथमिकताएं होनी चाहिए इन बातों को सोचिए। क्या आपको वह चीज़ें प्रोत्साहित करनी चाहिए…
एक दिन, मुझे अपनी वास्तविक दुनिया से भागने का एक रास्ता मिल गया, जो कि अपना सिर सोफे पर रख देना, अपने कान बंद कर लेना और बाहरी आवाज़ों को न सुनना, और खुद को पूरी तरह से एक ऐसी दुनिया में जाने देना जहां केवल मैं ही रहूं। जब मैं इस दुनिया में आऊंगा तो मेरी सारी परेशानियां दूर हो जाएंगी।	यह सुनने में रोमांचक लग रहा है कि आपने अपनी वास्तविक दुनिया से भागने का एक ऐसा रास्ता खोजा है। यह एक आकर्षक और आत्म-प्रतिपादित विचार हो सकता है। हालांकि, शायद इस मामले में एक सम्पूर्ण भागदौड़ की अवधि या तारीख के साथ कुछ और विचार करने की जरूरत हो सकती है। यह महत्वपूर्ण हो सकता है कि हम कई महत्वपूर्ण संबंध अनुभव करते हैं जो हमारे जीवन में महत्वपूर्ण होते हैं, जैसे कि परिवार, मित्रता और कर्मचारी हो …
मैं अक्सर अकेला और असहाय महसूस करता हूं, महसूस करता हूं कि मुझे कोई समझ नहीं रहा है या किसी का समर्थन नहीं कर रहा है, यहां तक कि जब मेरे आस-पास के लोग हैं, मैं अलग और अलग-थलग महसूस करता हूं, यह भावना मुझे बहुत उदास और नकारात्मक बनाती है, और कभी-कभी चिंता और अवसादग्रस्त लक्षणों की ओर ले जाती है	यह आपके लिए कठिन हो सकता है कि आप अकेला और असहाय महसूस करते हैं, लेकिन इस स्थिति से बाहर निकलने के लिए कुछ कारगर तरीके हैं। 1. अपने जीवन में समर्थन प्राप्त करें: जब आप अकेला महसूस करते हैं, तो आपको अपने आस-पास के मित्रों, परिवार के सदस्यों या कोई भी अच्छे संबंध वाले व्यक्तियों के साथ संपर्क करना चाहिए। इस तरह के मुद्दों को संशोधित करने की कोशिश करने के लिए सहायता मांगें। 2. अपने भावनाओं पर नियंत्…
आपका एक शब्द मेरा दिल तोड़ सकता है	मुआफ़ करें जब मैं आपका दिल नहीं तोड़ सकता हूँ, क्योंकि मैं एक सेवा हूँ और एक शब्द से यह नहीं हो सकता है। मेरा मकसद सिमित हद तक सहायता करना है। यदि आपको किसी विषय पर सहायता चाहिए, तो कृपया बताएं।
मैं अपने दिखने और फिट होने से बेहद असंतुष्ट हूं, अक्सर कम आत्मसम्मान और चिंता का अनुभव करता हूं	आप खुद की तस्वीर और स्वस्थ रहने के मामले में संतुष्ट नहीं हैं, लेकिन इस पर आपने सही कदम उठाना पहचाना है। यह सामान्य है कि हम सबकहीं न कहीं परिस्थितियों में आत्मविश्वास और चिंता क्षमता खो देते हैं। लेकिन इसे सुधारने के लिए कुछ कदम उठाए जा सकते हैं। 1. सक्रिय रहें: सक्रिय रहना आपके स्वास्थ्य को सुधारने और आत्मविश्वास को बढ़ाने में मदद कर सकता है। कोई एक्सरसाइज या खेल चुनें जिसे आप आनंद लेते हैं और …
मैं वास्तव में नहीं जानता कि मैं क्या कर रहा हूं, मुझे कोई सुराग नहीं है जब मैं कुछ करता हूं, यह निराशाजनक है	समझौता करने की आवश्यकता नहीं है! यह आपके लिए सामान्य है कि आपको यह पता नहीं है कि आप क्या कर रहे हैं, लेकिन सभी को ऐसी स्थिति से गुजरना पड़ता है। निराश होने की जगह, आप जीवन के विभिन्न क्षेत्रों में अपनी प्राथमिकताओं और रुचियों के बारे में सोच सकते हैं। कुछ नया आजमाएं, नई जानकारी हासिल करें, और अपने पसंदीदा गतिविधियों के बारे में सोचें ताकि आप नए दिशाओं में आगे बढ़ सकें। आपको स्वयं का पता लगाने और…
मुझे बहुत सामाजिक भय है, मैं अजनबियों के साथ संवाद करने की हिम्मत नहीं करता, और मुझे भीड़-भाड़ वाली जगहों पर दिखना पसंद नहीं है, मुझे आशा है कि मैं इन आशंकाओं को दूर कर सकता हूँ	दरअसल, सामाजिक भय आम समस्या है और इसके साथ संघर्ष करना सामान्य होता है। लेकिन, यह समस्या हल करने के लिए कुछ तरीके हैं जिनका आप इस्तेमाल कर सकते हैं। यहां कुछ सुझाव हैं: 1. धीरे-धीरे आरंभ करें: अपने आप को आवश्यकता के मुताबिक धीरे-धीरे आकस्मिकता के साथ सामाजिक स्थलों में मंचित करें। एक के बाद एक, अपनी सीमाओं को बढ़ाते जाएं और इसे आदत बनाएं। 2. संगठन में शामिल हों: किसी सामुदायिक संगठन या कोई ग्रुप …
मनोवैज्ञानिकों का मानना है कि अत्यधिक अवसाद व्यक्ति के शारीरिक और मानसिक स्वास्थ्य को प्रभावित कर सकता है	यह सही है। मनोवैज्ञानिकों का मानना है कि अत्यधिक अवसाद स्थिति में शारीरिक और मानसिक स्वास्थ्य पर नकारात्मक प्रभाव हो सकता है। अत्यधिक अवसाद के लक्षण में तनाव, नींद की कमी, भूख की कमी, निराशा, निराशा, आत्म-आत्महत्या के विचार, और शरीरिक समस्याएं शामिल हो सकती हैं। मानसिक रूप से, अत्यधिक अवसाद व्यक्ति को उदासीन, निराशावादी, और असामर्थ्य महसूस करने की जटिलताएं हो सकती हैं। यहां कुछ सामान्य तरीके हैं …
जब भी मैं किसी लक्ष्य का पीछा करना शुरू करता हूं, मैं शक्तिहीन महसूस करता हूं, और जब भी मैं कुछ बदलने की कोशिश करता हूं, मुझे लगता है कि मुझमें हिम्मत नहीं है	इस तरह की स्थिति में, हिम्मत और स्वयंविश्वास को प्राप्त करने के लिए कुछ उपाय कारगर हो सकते हैं। 1. सिद्ध संगठन करें: एक लक्ष्य को प्राप्त करने के लिए आपको एक सकारात्मक, सहायतापूर्ण और स्थायी समर्थन की आवश्यकता हो सकती है। आप अपने परिवार, मित्र, या मेंटर की मदद ले सकते हैं जो आपको समर्थन प्रदान कर सकते हैं और आपकी हिम्मत में सुधार करने में मदद कर सकते हैं। 2. सक्षमता के बारे में सोचें: अपनी क्षमता…
मैं अक्सर अनिद्रा और काम पर ध्यान केंद्रित करने में कठिनाई से पीड़ित रहता हूँ क्योंकि मुझे चिंता है कि मैं वह काम नहीं कर पाऊँगा जो मैं कर रहा हूँ	यह आम समस्या है और बहुत से लोगों को प्रभावित करती है। इससे बचने के लिए निम्नलिखित चीजें कर सकते हैं: 1. नियमित ध्यान या मेडिटेशन: ध्यान और मेडिटेशन के द्वारा, अपने मन को शांत करके और अपने ध्यान को संप्रेषित करके, आप अपनी चिंताओं को कम कर सकते हैं। इस तरह की अभ्यास आपको स्वस्थ मनोविज्ञान (mental well-being) प्रदान करती है और आपके लिए एक स्थिर मनोसंगत वातावरण सुनिश्चित करती है। 2. नियमित व्यायाम: न…
मुझे पहले से कहीं अधिक दर्द होता है जब मेरा परिवार मेरी मदद को अस्वीकार करता है	मुझे खेद है कि आपको ऐसी परिस्थिति से गुजरना पड़ रहा है। यह किसी के लिए बहुत मुश्किल हो सकता है जब उनका परिवार उनकी मदद को अस्वीकार करता है। शायद आप अपने परिवार के साथ संवाद करके उनसे अपनी बातें साझा कर सकते हैं और उनको अपने संदेश को समझने में मदद कर सकते हैं। आपके भावनाओं को समझने के लिए बातचीत करना महत्वपूर्ण हो सकता है और आपके परिवार को आपकी जरूरतों को समझने और समर्थन करने का विश्वास बना सकता ह…
हर बार जब मैं कठिनाइयों का सामना करता हूं तो मैं उदास महसूस करता हूं	यह सामान्य है कि हम जब कठिनाइयों का सामना करते हैं, तो उदास महसूस करते हैं। लेकिन आप इस परिस्थिति को बदल सकते हैं और सकारात्मक दृष्टिकोण प्राप्त कर सकते हैं। यहां कुछ सुझाव हैं: 1. ध्यान केंद्रित कीजिए: कठिनाइयों को देखने की बजाय, अपना ध्यान केंद्रित करें। प्रायोगिक ध्यान, मेधावी वाणी या मनन अभ्यास का प्रयास करें। यह शांति और सकारात्मकता का एक भयानक स्रोत हो सकता है। 2. प्रतिस्पर्धा की बजाय समान …
मैं अक्सर उदास और असहाय महसूस करता हूं, महसूस करता हूं कि मेरे जीवन में अर्थ और मूल्य का अभाव है, और कभी-कभी आत्महत्या के बारे में सोचता हूं, लेकिन मैं किसी को बताने से डरता हूं, इस डर से कि वे सोचेंगे कि मैं एक कमजोर और असफल व्यक्ति हूं।	मैं आपकी समस्या को समझता हूं और आपका ध्यान देना चाहूंगा। यह मानना कि आप कमजोर और असफल हैं एक भ्रम हो सकता है। जीवन के विभिन्न पहलुओं में हम सभी के यात्रा में कमी होती है और धीरे-धीरे सिखाते हैं। यदि आप अपने इंटरनल बातचीत को लेकर चिंतित हैं, तो मैं आपको एक विशेषज्ञ, चिकित्सा या मनोविज्ञानी के पास जाने और उनसे बात करने की सलाह दूंगा। वे आपकी सहायता कर सकते हैं और आपको सही मार्गदर्शन प्रदान कर सकते …
मेरा एक दोस्त है जो हमेशा महसूस करता है कि वह काफी अच्छा नहीं है, काफी स्मार्ट है, काफी प्रतिभाशाली है, या देखभाल करने लायक भी नहीं है, जो मुझे उसके मानसिक स्वास्थ्य के बारे में चिंतित करता है।	यह सामान्य है कि लोग कभी-कभी अपने आप को कमजोर, अप्रतिष्ठित या निरर्थक महसूस करते हैं। ऐसे मामलों में, आप अपने दोस्त के साथ बहस नहीं करने बजाय, उसे मदद और समर्थन देने की कोशिश कर सकते हैं। इसके लिए निम्नलिखित कार्यवाही कर सकते हैं: 1. सुनिश्चित करें कि आप खुले दिमाग से उसकी बातें सुन रहे हैं और उसे सम्मान दे रहे हैं। 2. उसे अपनी तारीफ करें और उसके स्ट्रेंथ्स (मजबूतियों) को पहचानने का प्रयास करें। …
काम के दबाव और पारिवारिक झगड़ों के कारण मैं अक्सर उदास और निराश महसूस करता हूँ।मैं इस भावना को कैसे दूर कर सकता हूँ और अपने मानसिक स्वास्थ्य को बनाए रख सकता हूँ?	अक्सर उदास और निराश महसूस होना आपके लिए नकारात्मकता का संकेत हो सकता है और इसे सक्रिय रूप से परिवर्तित करने की आवश्यकता हो सकती है। यहां कुछ सुझाव हैं जो आपको मानसिक स्वास्थ्य को बेहतर बनाए रखने में मदद कर सकते हैं: 1. स्थिति का समीक्षण करें: अपने जीवन की स्थिति का एक मूल्यांकन करें और दृष्टिकोण बदलने की कोशिश करें। क्या आप अपने काम और परिवार में कुछ बदलावों की आवश्यकता महसूस कर रहे हैं? 2. स्वास…
हाल ही में, मेरे दिमाग में बादल छाने लगे हैं और मुझे अपने मानसिक स्वास्थ्य की चिंता होने लगी है और यह मुझे डरा रहा है	मानसिक स्वास्थ्य के बारे में चिंतित होना सामान्य हो सकता है, लेकिन इसके लिए आपका ध्यान रखना महत्वपूर्ण है। मेरी सलाह है कि आप इसे ज्यादा दिमाग में ना लाएं और इस बारे में पेशेवर सहायता लें। यदि आपको लगता है कि आपका मानसिक स्वास्थ्य प्रभावित हो रहा है, तो आप निम्नलिखित कुछ कदम उठा सकते हैं: 1. बातचीत: अपने अपने विश्वासपात्र या परिवार के किसी सदस्य से अपनी चिंताओं को साझा करें। उन्हें बताएं कि आपका …
मुझे दूसरों का सामना करने की हिम्मत नहीं है, मुझे हमेशा लगता है कि मैं काफी अच्छा नहीं हूं, मैं घबराया हुआ हूं, भले ही मेरे दोस्त मुझसे बात करते हैं, मैं इस बात की चिंता करता रहूंगा कि वे क्या सोच रहे हैं	यह सामान्य होता है कि हम समय-समय पर ऐसी चिंताएं रखते हैं। लेकिन यह महत्वपूर्ण है कि हम खुद को स्वीकारें और आत्मविश्वास बढ़ाने के लिए सकारात्मक मान्यताएं जागृत करें। यदि आप खुद को इस तरह समझ रहे हैं, तो मैं आपको कुछ उपाय बता सकता हूं: 1. स्वयं को प्रस्तुत करना: अपनी क्षमताओं, योग्यताओं और प्रभावी गुणों को पहचानें और उन्हें बढ़ावा दें। आप निरंतर स्वयं का समीक्षण करें और प्रशंसा करें। 2. सकारात्मक स…
मुझे अपने मानसिक स्वास्थ्य को बनाए रखने में सक्षम नहीं होने और अपने परिवार को नीचा दिखाने की चिंता है	मानसिक स्वास्थ्य की देखभाल हमारे लिए बहुत महत्वपूर्ण होती है, इसलिए आपकी चिंता समझना सराहनीय है। यहां कुछ सरल तरीके हैं जिनसे आप अपने मानसिक स्वास्थ्य को सुधार सकते हैं: - सवालों का सामना करें: गहरे विचारों या चिंताओं को दबाने की बजाय, उन्हें उठाइए और उनके साथ सामना करें। बातचीत, ध्यानाभ्यास, योग और मेडिटेशन जैसी तकनीकें आपको मानसिक तनाव को कम करने में मदद कर सकती हैं। - स्वस्थ जीवन शैली: नियमित …
मैं अक्सर अकेला और असहाय महसूस करता हूँ, यहाँ तक कि जब मैं लोगों से घिरा रहता हूँ, तब भी मुझे लगता है कि मेरे भीतर की दुनिया को कोई नहीं समझता	यह सामान्य है कि हमें अकेलापन और असहायता का अनुभव हो सकता है, लेकिन यह महत्वपूर्ण है कि हम उसे सुलझाएं और सहायता प्राप्त करें। निम्नलिखित कुछ प्रयोगी सुझाव आपकी मदद कर सकते हैं: 1. एक समर्थन समुदाय में शामिल हों: यहां तक कि ऑनलाइन ग्रुप्स या सामाजिक मीडिया के माध्यम से भी आप समर्थन और संवाद के स्रोत खोज सकते हैं। 2. संगठन या संगठन के सदस्य बनें: किसी स्थानीय क्लब, समिति या सेवा संगठन के साथ जुड़क…
मैं भविष्य को लेकर बहुत भ्रमित महसूस करता हूं, मुझे नहीं पता कि क्या करना है, यह भ्रम मुझे बहुत चिंतित और असहज महसूस कराता है	आपकी चिंता समझी जाती है। भविष्य के बारे में चिंता करना एक सामान्य अनुभव हो सकता है, लेकिन यह महसूस करना जरूरी नहीं है कि हमें हमारे भविष्य को पूरी तरह से नियंत्रित करने की आवश्यकता है। यह मान्य है कि हमें एक स्वस्थ और आदर्श भविष्य की योजना बनाना चाहिए, लेकिन हमें स्थिर रहना और वर्तमान के पलों को अनुभव करने की क्षमता को भी सीखना चाहिए। यदि आपको असहज महसूस होता है या आप चिंतित होते हैं, तो आप कुछ म…
मैं आज एक पार्टी में गया था, लेकिन मुझे सभी ने हँसाया और दूसरों ने मुझे अस्वीकार कर दिया। मैं वास्तव में गिरने ही वाला था	मुझे खेद है कि आपका यह अनुभव इतना अच्छा नहीं रहा। प्रतिस्पर्धा के मद्देनजर, पार्टियों में ऐसी स्थिति हो सकती हैं। किसी को अस्वीकार करना अच्छा नहीं होता है, लेकिन महत्त्वपूर्ण है कि आप पर इसका असर न हो। प्राथमिकता यही होनी चाहिए कि आप खुद को मनोज्ञ करें, अपने कार्यों को समझें, और खुद पर विश्वास रखें। मैं आपसे यह सलाह दूंगा कि आप अपनी ताकतों और काबिलियतों को ढूंढें और संतुलन बनाए रखें। जब विपरीत पर…
मुझे अपने रिश्ते मुश्किल लगते हैं और लोगों के साथ गहरे संबंध बनाना हमेशा मुश्किल होता है। मुझे ऐसा लगा कि मुझे नहीं पता कि लोगों के साथ कैसे घुलना-मिलना है या कैसे संवाद करना है, इसलिए मैं आसानी से अलग हो गया। मैं कुछ सच्चे दोस्त बनाना चाहता हूँ, लेकिन यह नहीं जानता कि उन्हें कैसे बनाऊँ।	रिश्ते बनाना और अलग दोस्त बनाना केवल एक आंतरिक प्रक्रिया हो सकती है, लेकिन यह कुछ प्रयास और सामर्थ्य की आवश्यकता प्रस्तुत कर सकता है। यहां कुछ सुझाव हैं जो आपको मदद कर सकते हैं: 1. स्वयं में विश्वास करें: अपनी क्षमताओं, अंदरूनी सामर्थ्य और व्यक्तित्व में विश्वास रखें। जब आप अपनी संतुलन की स्थिति में होंगे, आप प्रतिस्पर्धी या अलग नहीं महसूस करेंगे। 2. सामाजिक स्थानों में शामिल हों: संगठन या क्लब, …
मेरा काम बहुत दबाव वाला है, मुझे हर दिन ओवरटाइम काम करना पड़ता है, और मैं अक्सर देर तक जागता हूँ। मुझे लगता है कि मेरा शरीर और दिमाग अपनी सीमा तक पहुँच गया है, लेकिन मैं अभी भी रुक नहीं सकता। इससे बचने के लिए मुझे क्या करना चाहिए विकार।	आपके लिए काम करना वास्तव में बहुत मुश्किल हो सकता है, लेकिन ऐसे मामलों में स्वास्थ्य और कार्य-जीवन संतुलन को सुनिश्चित रखना अत्यंत महत्वपूर्ण होता है। निम्नलिखित चरणों के माध्यम से आप इस स्थिति से बच सकते हैं: 1. कार्य समय का संगठन करें: दिन के काम को समय और प्राथमिकता आधारित तालिका में संगठित करने से आप कार्य के संग्रह और देखभाल की योजना बना सकते हैं। 2. प्राथमिकताएं सेट करें: सभी काम को करने की…
मुझे लगता है कि मैं अपनी भावनाओं को नियंत्रित नहीं कर सकता, और मैं अक्सर छोटी-छोटी बातों के कारण अपना आपा खो देता हूं, जिससे मेरे आसपास के लोग असहज हो जाते हैं	इसका समाधान कठिन नहीं है, लेकिन इसे प्राप्त करने के लिए अग्रिम प्रयास की आवश्यकता हो सकती है। यहां कुछ सुझाव हैं जो आपकी सहायता कर सकते हैं: 1. स्वयंसचेष्टा करें: अपनी भावनाओं की पहचान करें और उन्हें विचारशीलता के आधार पर समझें। यदि आप अपनी भावनाओं को जानते हैं, तो आप उन्हें नियंत्रित करने के लिए उपाय ढूंढने में कामयाब हो सकते हैं। 2. शारीरिक सुधार: व्यायाम, ध्यान और नियमित नींद जैसी शारीरिक गतिव…
मेरे परिवार में कोई प्यार नहीं था, कोई गर्म शब्द नहीं थे, सुरक्षा की कोई वास्तविक भावना नहीं थी, केवल मुझ पर दोष और दबाव था, इसलिए मैं और अधिक अंतर्मुखी हो गया और किसी के साथ व्यवहार नहीं करना चाहता था।	मैं समझता हूँ कि आपके परिवार में ऐसी स्थिति आपको असहज महसूस करा सकती है। ऐसे समय में आपके भावनाओं को समझना महत्वपूर्ण होता है और आपका मंदिर के बाहर व्यवहार पर कुछ प्रभाव पड़ सकता है। हालांकि, संघर्ष करने से पहले यह जानना महत्वपूर्ण होता है कि आप स्वयं क्या चाहते हैं। क्या आप चाहते हैं कि आपके भीतर का बदलाव हो और शांति, प्यार और स्वतंत्रता की भावना पाएं? अगर हाँ, तो आपके पास कुछ विचारों और कार्रवा…
मैं अपने भविष्य को लेकर चिंतित हूं, मुझे नहीं पता कि मैं सफल हो पाऊंगा या नहीं, अगर मैं अपने सपनों को साकार कर पाऊंगा	यह स्वाभाविक है कि हमें अपने भविष्य को लेकर चिंता होती है। सफलता या असफलता का निर्धारण अक्सर हमारी मेहनत, निर्धारित लक्ष्य के साथ मेल खाता है। यदि आप अपने सपनों को साकार करना चाहते हैं, तो कुछ बातों को ध्यान में रखें: 1. लक्ष्य निर्धारित करें: अपने सपनों को पुरे करने के लिए स्पष्ट लक्ष्य निर्धारित करें। यह आपको एक संगठित रूप से कार्य करने की संज्ञा देगा। 2. मेहनत करें: ऐसा कोई भी सपना नहीं है जिस…
मुझे ऐसा लगता था कि मैं अपने जीवन में तनाव और चुनौतियों का सामना नहीं कर सकता, और मैं अक्सर खराब मूड, चिंता और अनिद्रा से पीड़ित रहता था।	यदि आपको ऐसा लगता है कि आप अपने जीवन में तनाव और चुनौतियों का सामना नहीं कर सकते हैं, तो आपके पास कुछ करने के लिए कई विकल्प हैं। 1. समय निकालें और विचारों को स्वीकार करें: यदि आप जानते हैं कि तनाव और चुनौतियां आपके जीवन का हिस्सा हैं, तो वैसे ही उन्हें स्वीकार करें। यह आपको उनसे निपटने के लिए उचित तथा सक्रिय सामरूप बना सकता है। 2. स्वास्थ्यपूर्ण जीवनशैली अपनाएं: एक स्वास्थ्यपूर्ण जीवनशैली की अनुस…
मुझे अकेलापन महसूस होता है और मेरे आसपास बहुत सारे लोग हैं लेकिन मुझे हमेशा ऐसा नहीं लगता कि मैं वास्तव में उनसे जुड़ सकता हूं। क्या यह संबंध विकार है?	अकेलापन महसूस करना एक आम अनुभव हो सकता है और इसके कई कारण हो सकते हैं। पढ़ाई का तनाव, काम का प्रकीर्ण, सामाजिक या आध्यात्मिक संघर्ष, या व्यक्तिगत समस्याओं के कारण आपको इस तरह का अनुभव हो सकता है। इसके अलावा, संबंध विकार भी इसे प्रभावित कर सकता है, जिसमें आपकी भावनाएं, कल्पनाएं और जीवन दृष्टि के साथ सम्बंधित हो सकता है। अक्सर हम अकेलापन का अनुभव करते हैं, चाहे हमारे आसपास बहुत सारे लोग हों या न हो…
मैं भविष्य के बारे में बहुत असहज महसूस करता हूं, मुझे नहीं पता कि मेरे साथ क्या करना है, और नहीं जानता कि भविष्य में क्या होगा	यह काफी सामान्य है कि हम अपने भविष्य के बारे में चिंतित हों। कुछ लोगों को भविष्य की अनिश्चितता से सहनशीलता होती है, जबकि दूसरे इसे असहज महसूस करते हैं। लेकिन यह जानना जरूरी होता है कि भविष्य के बारे में पूरी तरह से नियंत्रण नहीं हो सकता। हमारे पास सिर्फ वर्तमान है और हम वर्तमान में कार्यवाही कर सकते हैं। यदि आपको भविष्य के बारे में चिंता है, तो यह थोड़ा मुश्किल हो सकता है, लेकिन आप कुछ निम्नलिखित…
मेरे रिश्ते में बहुत सारी समस्याएं हैं और मैं उदास और असहाय महसूस करता हूं और नहीं जानता कि क्या करूं	मैं आपकी मदद करने के लिए यहां हूँ। रिश्ते में समस्याएं होना एक सामान्य बात है, लेकिन उसे हल करने के लिए कुछ कदम उठाए जा सकते हैं। यहां कुछ सुझाव हैं जो आपको मदद कर सकते हैं: 1. संवाद करें: अपनी समस्याओं को दूसरों के साथ बातचीत करें। इससे आपको उनके मान्यताओं और विचारों को समझने में मदद मिलेगी। 2. समझें और स्वीकार करें: बिना जटिल बनाए अपनी स्थिति को देखें और उसे समझें। इसके बाद, जब आप अपने विचारों …
मैं अक्सर बहुत थका हुआ, शारीरिक और मानसिक रूप से कमजोर महसूस करता हूँ, और कभी-कभी आत्महत्या के विचार भी आते हैं, यह महसूस करते हुए कि मेरा जीवन व्यर्थ है	मुझे खेद है कि आप ऐसा महसूस कर रहे हैं। ऐसे दुखद और जरूरी विचारों से गुजरना बहुत मुश्किल हो सकता है, लेकिन यदि आप एक विशेषज्ञ से संपर्क करेंगे, तो यह माध्यम आपकी स्थिति को सुधारने में मदद कर सकता है। पहले और सबसे महत्वपूर्ण चरण, कृपया अपने परिवार या दोस्तों के साथ इस बारे में बातचीत करें। वे आपको सहायता और समर्थन दे सकते हैं और आपको सही दिशा में मार्गदर्शन कर सकते हैं। दूसरे, मानसिक स्वास्थ्य पेश…
कभी-कभी मुझे अचानक अत्यधिक भय और घबराहट का अनुभव होता है, और मेरी भावनाओं और व्यवहार को नियंत्रित करना मुश्किल होता है, और यह स्थिति लंबे समय तक बनी रहती है।	यह स्थिति आपके लिए कठिन हो सकती है, लेकिन इसका सामना करने के लिए आप कुछ कदम उठा सकते हैं। 1. ध्यान और मनोविज्ञानिक तकनीकों का उपयोग करें: योग और मेधाविधान आपको मन को शांत करने और भय को कम करने के लिए मदद कर सकते हैं। प्राणायाम, मन की शान्ति और अनुशासन प्रशिक्षण की तकनीकें इसमें सहायक हो सकती हैं। 2. स्थिरता क्रियाएँ जारी रखें: एक नियमित रूप से योग, ध्यान, अभ्यास और स्वास्थ्यप्रद आहार के लिए समय न…
जब भी मैं किसी नई चुनौती का सामना करता हूं, तो मैं इतना घबराया हुआ और असुरक्षित महसूस करता हूं कि मुझे लगता है कि मैं इसे संभाल नहीं सकता	यह एक सामान्य प्रतिक्रिया है जब हम नई चुनौतियों का सामना करते हैं। इसे संभालने के लिए निम्न चरणों का पालन कर सकते हैं: 1. अपनी निर्देशिका स्पष्ट करें: यदि आपको लगता है कि आप चुनौती को संभाल नहीं सकते हैं, तो सबसे पहले अपनी निर्देशिका को स्पष्ट करें। नई चुनौती के लिए आवश्यक कौशलों, ज्ञान या संसाधनों की पहचान करें। 2. अपनी आत्मविश्वास को मजबूती प्रदान करें: अपने कौशलों, अनुभव और योग्यताओं को समझो औ…
मुझे कभी-कभी अचानक लगता है कि मुझे अब कोई शौक नहीं है, किसी चीज में कोई दिलचस्पी नहीं है, और मुझे लगता है कि मैंने दिशा और प्रेरणा खो दी है	यह सामान्य है कि जीवन में ऐसे समय आते हैं जब हमें ऐसा लगता है कि हम कहीं खो गए हैं और हमें कोई दिशा और प्रेरणा नहीं मिल रही है। एक कुछ सुझाव हैं जो आपकी मदद कर सकते हैं: 1. विभिन्न कार्यों और गतिविधियों को प्रयास करें: किसी नए कार्य या गतिविधि को आजमाने के लिए समय निकालें। शायद आपको नए और दिलचस्प क्षेत्रों में दिलचस्पी मिल सके। 2. आपके संपर्क में रहने वाले लोगों के साथ वक्त बिताएँ: अक्सर बातचीत, …
कभी-कभी दिल में एक बेकाबू इमोशन आ जाता है, सोचता हूं कि डिप्रेशन हो तो क्या करूं	डिप्रेशन एक गंभीर मानसिक स्थिति हो सकती है और उसे अनदेखा करना असामान्य होता है। यहां कुछ तरीके हैं जिनका इस्तेमाल करके आप अपने डिप्रेशन से निपट सकते हैं: 1. अपने विचारों को साझा करें: अकेलापन और विचारों को बंद करना डिप्रेशन को बढ़ा सकता है। इसलिए, आपको इसे अपने दोस्तों और परिवार के साथ साझा करने की कोशिश करनी चाहिए। 2. स्वस्थ जीवनशैली: अपने दैनिक जीवन में स्वस्थ आहार ले, नियमित रूप से व्यायाम करे…
मैंने हमेशा महसूस किया है कि मेरा शरीर बहुत असहज है, और मेरे सभी प्रकार के अजीब लक्षण हैं, लेकिन डॉक्टरों का कहना है कि मैं अच्छे स्वास्थ्य में हूं, जिससे मैं बहुत चिंतित और असहाय महसूस करता हूं।	यह सामान्य है कि लोग अपने शरीर के बारे में विभिन्न अनुभवों और लक्षणों को महसूस करते हैं, लेकिन डॉक्टरों के कहने पर यदि आपके आपातकालीन परीक्षण में कोई समस्या नहीं मिली है, तो संभव है कि आपके शरीर के असामान्य संकेतों का कारण कुछ और हो सकता है। वस्तुतः, मानसिक स्वास्थ्य और तनाव इस प्रकार के लक्षणों का मुख्य कारक हो सकते हैं। आपके चिंतित होने का कारण समझने के लिए, यह महत्वपूर्ण है कि आप एक विशेषज्ञ च…
लंबे समय तक तनावपूर्ण माहौल में रहने के कारण, हुआंग ज़ियाओमिंग अक्सर अनिद्रा से पीड़ित होता है, सुबह और शाम के बीच अंतर नहीं बता सकता, और पूरी तरह से अपनी लय खो देता है	यदि आप लंबे समय तक तनावपूर्ण माहौल में रह रहे हैं और अनिद्रा की समस्या से पीड़ित हो रहे हैं, तो कुछ सुझावों का पालन करें सकते हैं: 1. नियमित व्यायाम: नियमित व्यायाम करना तनाव को कम करने और नींद लाने में मदद कर सकता है। आप योग, मेडिटेशन या ध्यान भी प्रयास कर सकते हैं। 2. संयमित दैनिक जीवनशैली: एक नियमित और संयमित दैनिक जीवनशैली अपनाएं। एक निश्चित समय में सोने और उठने का एक रुटीन बनाएं, रात को सोने…
मेरे दोस्तों के साथ मेरा रिश्ता कभी भी अच्छा नहीं रहा है, मुझे लगता है कि मेरे लिए असली दोस्त बनाना मुश्किल है और यह मुझे बहुत अकेला महसूस कराता है	यह बहुत आम समस्या है और आप अकेला महसूस करना बहुत दुःखद हो सकता है। इस समस्या को हल करने के लिए कुछ उपाय हो सकते हैं। पहले, अपनी वाणिज्यिक संगठनाओं या स्थानीय समुदायों में सहयोग करने का प्रयास करें। यह आपको लोगों के साथ नए संपर्क स्थापित करने और अच्छे दोस्त बनाने में मदद कर सकता है। दूसरे, आपके रिश्तों का जांच करें और विचार करें कि क्या कुछ वास्तविकता है जो आपके दोस्ती में कमी ला सकती है। कभी-कभी …
मेरे आसपास के लोग हमेशा सोचते हैं कि मैं बहुत घबराया हुआ हूं और छोटी-छोटी बातों को लेकर चिंतित रहता हूं, मैं खुद को कैसे रिलैक्स कर सकता हूं?	यदि आप खुद को रिलैक्स करना चाहते हैं तो यहां कुछ सुझाव हैं जो आपकी मदद कर सकते हैं: 1. ध्यान और मेडिटेशन: ध्यान और मेडिटेशन एक अच्छा तरीका है अपने मन को शांत करने का। इसे रोजाना अपनी दिनचर्या में शामिल करें। 2. साँस लेने की अभ्यास: प्राणायाम तकनीकें जैसे कि अनुलोम-विलोम या कपालभाति करके आप अपने मन और शरीर को संतुलित कर सकते हैं। 3. योग: योग आपको शांति और स्थिरता का एक अनुभव प्रदान कर सकता है। निय…
मेरी अनिद्रा मुझे हर रात एक मनोचिकित्सक को देखने के लिए मजबूर कर रही है	अनिद्रा एक चिंता का कारण हो सकती है और एक मनोचिकित्सक के साथ बातचीत करना आपके लिए मददगार हो सकता है। यह सहायता के साथ हो सकती है इसलिए मैं आपको अपने लिए एक मनोचिकित्सक से मिलने की सलाह देता हूँ। एक पेशेवर की मदद लेने से, आप अपनी अनिद्रा समस्या का पता लगा सकते हैं और उसे ठीक करने के लिए सही दिशा में कदम उठा सकते हैं। यह सुनिश्चित करें कि आप एक विशेषज्ञ के पास जाने से पहले एक नियुक्ति लें, ताकि आप …
मुझे लगता है कि मैं परिवार और समाज के दबाव का सामना करने में सक्षम नहीं हूं और मैं बहुत कुछ हासिल नहीं कर सकता	यह आपसे संबंधित एक मानसिक समस्या हो सकती है और इसका निपटारा करने के लिए कुछ कदम उठाए जा सकते हैं। मेरी कुछ सूचनाएं हैं जो आपकी मदद कर सकती हैं: 1. आदर्श समर्थकों का चयन करें: अपने परिवार और समाज में आपकी समर्थन करने वाले लोगों की तलाश करें, जो आपके सपनों और योजनाओं का समर्थन कर सकते हैं। इन लोगों की सहायता आपको आत्मविश्वास देगी और आपको दबाव का सामना करने की क्षमता प्रदान करेगी। 2. निजी और सामाजिक…
मुझे ऐसा लगता है कि मेरे रिश्ते खराब हो रहे हैं, न तो परिवार और न ही दोस्त अब मुझ पर भरोसा करते हैं और न ही मेरा साथ देती हैं, यह मुझे इतना खोया हुआ और निराश महसूस कराता है।	मुझे बहुत दुख हो रहा है कि आप ऐसा महसूस कर रहे हैं। रिश्तों में समस्याएं होना या उनका अस्थायीता में समाप्त होना काफी सामान्य होता है, लेकिन यह स्थिति आपको निराश महसूस कर रही है तो इसे ठीक करने के लिए कुछ कार्रवाइयाँ ले सकते हैं। 1. सचेत रहें: अपने रिश्तों को सचेती से देखें और ध्यान दें कि क्या हमारे बीच कोई संघर्ष हो रहा है या क्या कोई समस्या है जो हमें आपसी समझ और सहयोग के लिए बातचीत करनी चाहिए।…
मैं अक्सर अपनी भावनाओं और व्यवहार को नियंत्रित करने में असमर्थ महसूस करता हूं और अक्सर आवेगपूर्ण या हिंसक व्यवहार करता हूं।	यह अस्थायी और बाधात्मक अनुभव हो सकता है। यह मानसिक स्वास्थ्य के लिए हानिकारक भी हो सकता है। मैं आपकी सहायता करने के लिए यहां हूँ। यहां कुछ उपाय हैं जिन्हें आप अपने व्यवहार को नियंत्रित करने में सहायता के लिए आजमा सकते हैं: 1. सदैव ध्यान दें कि आपके व्यवहार का कारण क्या है। क्या कोई विशेष प्रतिक्रिया या परिस्थिति आपकी भावनाओं को प्रभावित कर रही है? इसे समझने के बाद आप उसे संभालने के लिए उपाय ढूंढ …
मैं अक्सर अस्वीकार किए जाने से डरता हूं, इसलिए मैं शायद ही कभी अपने मन की बात कहता हूं	यह बहुत सामान्य है कि हमें अपने विचारों और भावनाओं को साझा करने में कुछ कठिनाई महसूस हो सकती है। लेकिन अपनी बात कहना आपके लिए महत्वपूर्ण हो सकता है क्योंकि यह आपको स्वास्थ्यपूर्ण संबंध और स्वयं को समझने में मदद कर सकता है। यहां कुछ सुझाव हैं जो आपको अपने मन की बात कहने में मदद कर सकते हैं: 1. किसी विशिष्ट कारण के बारे में सोचें: जब आप जानने का प्रयास करते हैं कि आप अपनी बात साझा क्यों नहीं कर पा …
किशोरावस्था के दौरान अवसाद धीरे-धीरे विकसित होने लगता है	किशोरावस्था आमतौर पर तनावपूर्ण और उत्साहजनक होती है, लेकिन यह समय आपके मनोवैज्ञानिक एवं शारीरिक बदलावों के लिए मुश्किल होता है। इस अवधि में अवसाद का विकास हो सकता है, जो धीरे-धीरे होता है और सामान्य जीवन के कई पहलुओं पर असर डाल सकता है। यहां कुछ कारण बताए गए हैं, जिनके कारण दौरान किशोरावस्था में अवसाद विकसित हो सकता है: 1. हार्मोनल परिवर्तन: यह अवसाद के विकास का मुख्य कारक हो सकता है। किशोर युवा …
मैं अपने रूप-रंग और शरीर से असंतुष्ट महसूस करता हूँ, खुद को पूर्ण से कम महसूस करता हूँ, और अक्सर चिंतित और असुरक्षित महसूस करता हूँ	मुझे खेद हो रहा है कि आप असंतुष्ट महसूस कर रहे हैं। पहले टिप्स के रूप में, आप अपने शरीर के साथ प्यार और स्वीकृति करने का प्रयास कर सकते हैं। अपनी संतुलित आहार और व्यायाम की देखभाल रखें, और स्वस्थ सोचने और जीने के अभ्यास में लगे रहें। अगले, अपनी आत्मा की देखभाल के लिए समय निकालें। ध्यान या मेडिटेशन जैसी प्रायोगिक तकनीकों का उपयोग करें जो आपको शांति और स्थिरता की अनुभूति देने में मदद कर सकती हैं। इ…
मुझे हमेशा इस बात की चिंता रहती है कि मैं जो कर रहा हूं वह काफी अच्छा नहीं है, भले ही दूसरों ने मेरी प्रशंसा की हो, मैं अपनी चिंताओं को जाने नहीं दे सकता	यह सामान्य है कि हमें अपने काम पर संदेह हो सकता है और हमारी चिंताएं बढ़ सकती हैं। हालांकि, इसे निपटने के लिए, निम्नलिखित उपायों का अनुसरण कर सकते हैं: 1. प्रतिस्थापना करें: अगर आप अपने काम पर संदेह कर रहे हैं, तो यह महत्वपूर्ण है कि आप सकारात्मक तरीके से सोचें और प्रतिस्थापना करें। यह सुनिश्चित करेगा कि आप अपने काम को लेकर आत्मविश्वास को बढ़ाते रहें। 2. अपने उपलब्धियों को देखें: समय-समय पर अपने द…
मुझे ध्यान केंद्रित करना लगातार कठिन होता जा रहा था, चाहे वह पढ़ना हो या काम करना, मैं आसानी से विचलित हो जाता था	यदि आपको ध्यान केंद्रित करने में कठिनाई हो रही है, तो आप निम्नलिखित तरीकों का उपयोग करके अपनी स्थिति में सुधार कर सकते हैं: 1. नियमित व्यायाम करें: योग, प्राणायाम या व्यायाम जैसी संरचित शारीरिक गतिविधियाँ आपके मानसिक स्थिति को सुधारने में मदद कर सकती हैं। ध्यान केंद्रित करने से पहले अपने शरीर को सक्रिय रखना महत्वपूर्ण है। 2. विश्राम करें: कठिनाई के समय ध्यान केंद्रित करने के बजाय, कुछ समय अपने दि…
मुझे हमेशा लगता है कि मेरा कोई मूल्य नहीं है, मुझे नहीं पता कि मेरे अस्तित्व का अर्थ क्या है, और मैं हर दिन खाली और असहाय महसूस करता हूं।	मुझे खेद है कि आप ऐसा महसूस कर रहे हैं। हालांकि, आपका अस्तित्व बहुत महत्वपूर्ण है और आपका मूल्य किसी भी रूप में तैयार नहीं किया जा सकता है। यह आपके समय, अनुभव और अवधारणाओं के आधार पर निर्धारित होता है। असहाय होने की जगह पर, आप अपनी क्षमताओं, संसाधनों और स्वयं के विकास के लिए केंद्रित होने के लिए संशोधित उपाय देख सकते हैं। यह समय लेने वाली प्रक्रिया हो सकती है, लेकिन यह मदद कर सकती है आपको स्वयं क…
मैं लोगों के साथ बातचीत करने से डरता था, अस्वीकार किए जाने, उपहास किए जाने या गलत समझे जाने से डरता था, और मैं अक्सर अकेला और असहाय महसूस करता था।	यह बहुत सामान्य है कि कई लोग सामाजिक स्थितियों में असहाय महसूस करते हैं और बातचीत करने से डरते हैं। इसे सामान्यतया सामाजिक अवकाशिता कहा जाता है और इसमें काफी लोगों को प्रभावित करता है। यह इस प्रकार हो सकता है कि आप अपनी बातों की गलत अनुवाद करते हैं, अपने विचारों या सवालों को सामर्थ्यवान तरीके से पेश नहीं करते हैं अथवा आप अपनी आत्मविश्वास खो देते हैं। आप इन चुनौतियों का सामना करने के लिए कुछ कदम उ…
मैं अपने रूप और फिगर से बहुत असंतुष्ट था, और बदसूरत और अनाकर्षक महसूस करता था। मैं अक्सर प्लास्टिक सर्जरी कराने और वजन कम करने के बारे में सोचता था, लेकिन मैं सर्जरी के जोखिमों के बारे में भी चिंतित था, और दूसरों के उपहास और अस्वीकार किए जाने से डरता था।	मैं आपके एहसानकारी और सहायतापूर्णस्वरूपण लेकर बहुत खुश हूँ। आपकी सामस्या आम है और बहुत से लोग ऐसी परेशानियों का सामना करते हैं। एक सर्जरी या वजन घटाने की जरूरत नहीं है, आप बेहतर और स्वस्थ लगने के लिए अन्य तरीकों का प्रयास कर सकते हैं। पहले, अपने रूप और फिगर को स्वीकारें और स्वीकारें कि आप एक अद्वितीय और खास व्यक्ति हैं। किसी दूसरे के तुलना में सोचने की बजाय, अपने गुणों और योग्यताओं पर जोर दें और …
मैं अक्सर देर तक जागता हूँ और काम के लिए ओवरटाइम काम करता हूँ, जिससे मेरी शारीरिक हालत बद से बदतर हो जाती है, लेकिन मैं रुक नहीं सकता, क्योंकि मुझे लगता है कि केवल इसी तरह से मैं अपनी काबिलियत और योग्यता साबित कर सकता हूँ	देर तक जागने और ओवरटाइम करने से अपनी काबिलियत और योग्यता साबित करना महत्वपूर्ण है, लेकिन अच्छी शारीरिक हालत भी साधारण रूप से बहुत महत्वपूर्ण होती है। कुछ सुझाव निम्नलिखित हैं: 1. नियमित व्यायाम: दिन के समय अपना कुछ समय निकालें और नियमित व्यायाम करें। यह आपकी शारीरिक प्रतिरोधक क्षमता को बढ़ाने में मदद करेगा। 2. सही आहार: स्वस्थ और पौष्टिक आहार लेना भी आवश्यक है। अपने भोजन में प्रोटीन, फल और सब्जिय…
मैं खुद को गेम और सोशल मीडिया का ज्यादा से ज्यादा आदी महसूस करता हूं, जैसे कि ये चीजें मेरे जीवन का एक अभिन्न अंग बन गई हैं, यह निर्भरता मुझे खुद को निकालने और खुद को खोने में असमर्थ महसूस कराती है, मुझे उम्मीद है कि इससे छुटकारा पाने का कोई रास्ता मिल जाएगा यह निर्भरता के तरीके।	यदि आपको ऐसा लगता है कि आप गेम और सोशल मीडिया की ओर अधिक आकर्षित हो रहे हैं और आप इस निर्भरता को छोड़ना चाहते हैं, तो निम्नलिखित कुछ सुझाव आपकी मदद कर सकते हैं: 1. संतुलित समय निर्धारित करें: गेम और सोशल मीडिया के लिए निर्धारित समयबद्ध करें और नियमित रूप से इसे पालन करें। उदाहरण के लिए, आप सप्ताह में कुछ स्थितियों पर सीमित कर सकते हैं जब आपको गेम करने या सोशल मीडिया का उपयोग करने की अनुमति मिले। …
इसने मुझे परेशान किया कि मेरा मूड हमेशा ऊपर और नीचे रहता था, कभी-कभी मैं बहुत खुश होता था, और कभी-कभी मैं इतना उदास हो जाता था कि मैं खुद को भी मार देना चाहता था।	यह गंभीर बात है और मैं आपकी मदद करने के लिए यहाँ हूँ। ऐसी स्थिति में, मैं आपको विशेषज्ञ सलाह देने का सुझाव दूंगा। हालांकि, मैं आपको यहां कुछ साधारण ध्यान देने के सुझाव दे सकता हूँ: 1. सुखद गतिविधियाँ: ऐसी गतिविधियों का प्रयास करें जो आपको खुश और संतुष्ट बनाती हैं। इस सहायता से मनःस्थिति पर अच्छा प्रभाव पड़ता है। किसी मनोरंजक कार्य में शामिल होने के बारे में विचार करें, जैसे कि एक नई शौक, स्वतंत्र…
कभी-कभी मुझे ऐसा लगता है कि कोई भी मेरी परवाह नहीं करता है और मैं केवल एक ही हूं जिस पर मैं वास्तव में भरोसा कर सकता हूं	यह आम बात है कि हर किसी को ऐसा अनुभव होता है कभी-कभी। इसे "सोशल इंटरेस्ट नुक्सान" कहा जाता है और ऐसे समयों में हम अकेले महसूस करते हैं। हालांकि, यह बात सच नहीं होती है क्योंकि लोग आपके बारे में सोचते हैं, परवाह करते हैं और आपको समर्थन प्रदान करने के लिए अपने पास समय निकालते हैं। इसलिए, यदि आपको ऐसा अनुभव होता है तो कभी-कभी इसके पीछे कुछ मानसिक या भावनात्मक कारक हो सकते हैं। इस समय में आप इन कठिना…
हाल ही में, मैं अक्सर अनिद्रा से पीड़ित हूं और हमेशा रात में बिस्तर पर करवटें बदलता हूं। क्या यह एक अंतर्निहित मनोवैज्ञानिक समस्या हो सकती है?	जी हां, अनिद्रा और रात में करवटें बदलना मनोवैज्ञानिक समस्या हो सकती है। यह जटिलताओं की एक प्रकार हो सकती है जो नींद में या नींद के दौरान आती हैं। अनिद्रा से पीड़ित होने के अन्य कारणों में स्थायी तनाव, मानसिक तकलीफ, शारीरिक समस्याएं, जीवनशैली के परिवर्तन, एक अस्वस्थ आहार या अवसाद भी शामिल हो सकते हैं। इसे ठीक करने के लिए आप किसी मनोवैज्ञानिक चिकित्सक से मार्गदर्शन ले सकते हैं जो आपको सही जांच और उ…
मेरे परिवार के साथ मेरे संबंध कभी अच्छे नहीं रहे, मुझे ऐसा लगता है कि वे मुझे नहीं समझते, मेरा सम्मान नहीं करते, इससे मुझे अकेलापन महसूस होता है	मुझे खेद है कि आपको ऐसा अनुभव हो रहा है। परिवारी संबंध बहुत महत्वपूर्ण होते हैं, और इसे सुधारना इतना आसान नहीं हो सकता है। लेकिन, आप कुछ कदम उठा सकते हैं जो आपको सहयोग प्रदान कर सकते हैं। 1. बातचीत करें: अपने परिवार के सदस्यों के साथ वार्तालाप करने का प्रयास करें। खुले मन से अपनी बातें साझा करें और उन्हें अपनी भावनाओं के बारे में समझाएं। 2. समझ और सहानुभूति करें: अपने परिवारी सदस्यों की स्थिति को…
मैं अक्सर अंदर खाली और अकेला महसूस करता हूं, शून्य को भरने के लिए कुछ ढूंढ रहा हूं, लेकिन अक्सर भावना को दूर करने का सही तरीका नहीं ढूंढ पाता	यह सामान्य है कि हम सभी कभी-कभी अकेला महसूस करते हैं और शून्य को भरने के लिए ढूंढ़ रहे हों। यहां कुछ सुझाव हैं जो आपको भावना को दूर करने और खुद को और संतुष्ट महसूस करने में मदद कर सकते हैं: 1. स्वास्थ्य और फिटनेस गतिविधियों में हिस्सा लेना: योग, ध्यान और व्यायाम जैसी गतिविधियाँ आपकी मनशक्ति को बढ़ावा देती हैं और एक सकारात्मक दिमाग को प्रोत्साहित करती हैं। 2. विचारों को बदलना: अकेले होने के बारे म…
