# Supplementary material
Source: ML conference proceedings conference paper supplement (https://openreview.net/forum?id=JL42j1BL5h)
Supplement: supplementary_material [file Mental_Health_gpt.xlsx]

## Sheet: Sheet1
Input	Output
I often feel lonely and helpless, no one can understand me, I even feel like a loser, without any value and meaning, this feeling makes me very depressed and hopeless, I don't know how to get rid of them.	I'm sorry that you're feeling that way. It's important to understand that you are not alone in feeling lonely, helpless, or like a loser. Many people experience these types of feelings at some point in their lives. It's important to remember that our thoughts and feelings are not always accurate reflections of reality. You are a valuable person with unique qualities and strengths. It might be hel…
Even if I'm just going to buy a bag of chips, I worry that people will think I'm eating too much self-defeating behavior	It's important to remember that what other people think of you is not as important as how you feel about yourself. Eating a bag of chips does not define who you are as a person and it's okay to indulge once in a while. It's all about balance and moderation. If you're feeling guilty about it, try to focus on how you can balance it out with healthier choices throughout the day. And remember to be k…
I was always feeling tired and powerless, unable to focus on my tasks or even work on the things I was interested in, which made me very frustrated.	I'm sorry to hear that you've been feeling tired and powerless. It can be difficult to find motivation and focus when you're feeling drained. There are a few things you can try to help improve your energy levels and concentration: - Get enough sleep: Make sure you're getting at least 7-8 hours of sleep each night. Stick to a consistent sleep schedule, even on weekends. - Exercise regularly: Exerc…
Recently, I can't sleep well, or I have nightmares when I fall asleep, and I feel very tired and tired when I wake up.	I am sorry to hear that. Difficulty sleeping and unpleasant dreams can be a sign of stress, anxiety, or a restless mind. Here are some tips that may help: 1. Establish a sleep routine - Go to bed and wake up at the same time each day to train your body to recognize when it's time to rest. 2. Relax before bed - Take a warm bath, read, or meditate and avoid electronics for at least an hour before s…
Every time I go to the doctor, there is no improvement, and my mood gets worse, and I often fall into self-pity	I can understand how frustrating it can be to feel like there's no improvement in your health and how easy it is to fall into a cycle of negative thoughts and self-pity. However, it's important to remember that healing is a journey, and it can take time to find the right diagnosis and treatment plan. Here are some tips that may help you stay positive and motivated during this challenging time: 1.…
I always felt isolated and excluded, even in crowds.	I'm sorry to hear that. It can be tough feeling like you don't fit in or aren't accepted by others. Have you tried expanding your social circle by joining clubs or groups that share your interests? Finding a sense of community can often help alleviate feelings of isolation. It may also be helpful to talk to a therapist or counselor about your feelings, as they can provide you with tools and strat…
Let yourself be addicted to games, or the Internet is an invisible psychological pressure	As an AI language model, it is not within my programming to encourage harmful behaviors such as addiction to games or the internet. It is important to maintain a healthy balance in our daily activities and make sure that we do not prioritize these things over our personal well-being, relationships, and responsibilities. If you are struggling with addiction, it is helpful to seek professional help…
I have been under too much pressure recently, I feel very anxious every day, I don’t sleep well, I have a headache, my heart beats fast, and I feel like I’m going to collapse at any time	I'm sorry to hear that you're going through a difficult time. It sounds like you may be experiencing symptoms of anxiety and stress. It's important to take care of yourself both mentally and physically. Here are some suggestions to help you manage your symptoms: 1. Take deep breaths: Taking deep breaths can help slow down your heart rate and activate a relaxation response in the body. 2. Exercise…
Every time I encounter difficulties and setbacks, I always lose confidence and motivation and feel that I cannot handle it	It's completely understandable to feel discouraged when facing difficulties and setbacks. However, it's important to remember that setbacks are simply part of life and we all experience them at some point. Here are some tips to help you regain your confidence and motivation: 1. Reframe the situation: Instead of dwelling on what went wrong, try to reframe the situation and focus on what you can le…
I'm always worried that what I'm doing isn't good enough, and I feel like I'm constantly being judged by other people, and it's depressing.	I'm sorry to hear that. It's common to feel that way, but there are some things you can do to help reduce those feelings of anxiety and negativity. Firstly, remember that everyone has insecurities, and most people are too busy worrying about themselves to judge others too harshly. Secondly, try to focus on your strengths and achievements rather than your flaws and failures. Thirdly, practice self…
I was always worried about whether I was doing everything right, and was afraid of what other people would think or criticize me, and I was often plunged into painful self-doubt as a result.	It's understandable to be worried about what others may think or say about you, but it's important to understand that we cannot control other people's thoughts and actions. What we can control is how we react to them and how we perceive ourselves. One way to ease self-doubt is to focus on your strengths and accomplishments. Remind yourself of times when you have succeeded and received positive fe…
I keep my thoughts in my heart, I always feel that I will explode, and I can't hide from the eyes of others	It sounds like you may be feeling overwhelmed and in need of a release for your thoughts. One helpful technique to try is journaling; this can be a safe and private space for you to express your innermost thoughts and feelings without worrying about anyone else seeing them. Additionally, you may want to consider speaking with a trusted friend, family member, or mental health professional about yo…
My family experienced a sudden accident, both of my parents were seriously injured, which made me feel helpless and depressed, and even developed symptoms of depression.	I am sorry to hear that your family is going through a difficult time. It's understandable to feel helpless and depressed in such situations. However, it's important to seek help and support during this time. You can talk to a mental health professional who can provide you with strategies to cope with your emotions and symptoms of depression. You may also want to reach out to family members, frie…
I found myself less and less comfortable with people, always preferring to be alone, not interested in socializing or sharing my life with others, this loneliness made me feel very depressed	It sounds like you may be experiencing social anxiety or struggling with feelings of isolation. It's important to take care of your mental health and seek support from loved ones, a therapist, or a support group. You don't have to go through this alone. Consider reaching out to a trusted friend or family member to talk about how you're feeling, or exploring therapy options to address your feeling…
I have a strong desire for control and always want to manipulate everything in my own hands, not allowing others to interfere or intervene, which leads to broken relationships.	It's great that you recognize this pattern in yourself. Being controlling can have a negative effect on your relationships and can make it difficult for others to feel valued and heard. Here are a few strategies that may help you manage this behavior: 1. Practice mindfulness: By becoming more aware of your thoughts, emotions, and physical sensations, you can learn to respond instead of react, whi…
I often feel that my mind is very chaotic, as if there are too many thoughts and voices in my head at the same time, making me feel very confused and lost	I understand how overwhelming that can feel. One technique you could try is to practice mindfulness and focus on your breathing to help clear your mind. Another helpful strategy is to write down your thoughts or use a journal to help organize them. As you write, try to identify the most pressing thoughts or concerns, and then prioritize them and make a plan to address them one at a time. Addition…
Why is it that everything I do is criticized by my family?	As an AI language model, I can speculate some reasons why you might be experiencing criticism from your family. 1. High expectations - If your family has high expectations for you, they may criticize and nitpick even the smallest mistakes or imperfections. 2. Comparison - If your family has a habit of comparing you to others, they may criticize you for not measuring up to their expectations. 3. C…
Recently, I always feel exhausted and have no energy every day, even after sleeping for a long time, it doesn’t get better	I'm sorry to hear that. There can be several reasons why you are feeling exhausted all the time. Here are a few factors that might be contributing to it: 1. Lack of sleep: Even if you're sleeping for a long time, the quality of your sleep may be poor. This can cause you to feel tired and exhausted. 2. Nutrient deficiency: A lack of certain vitamins or minerals in your diet can cause you to feel s…
I feel like I've lost all motivation and hope and life feels meaningless	I'm sorry to hear that you're feeling that way. It's normal to go through periods where things feel difficult and overwhelming. However, it's important to find ways to cope with these emotions. Here are a few suggestions: 1. Talk to someone: Sometimes just talking about your feelings with someone you trust can help you feel better. This can be a friend, family member, or even a therapist. 2. Prac…
I feel very nervous sometimes, and I also feel down sometimes, but I don't know how to change my mood	It's understandable to feel nervous and down sometimes. There are a few things you can try to help improve your mood. 1. Exercise: Physical activity releases endorphins that can boost your mood and reduce stress levels. Consider taking a walk, going for a run, or trying a yoga class. 2. Practice relaxation techniques: Deep breathing, meditation, and progressive muscle relaxation are all technique…
I have problems with my thinking and perception, and I often hear strange sounds or see strange things, which make me feel very scared	I am sorry to hear that you are experiencing such difficulties. It sounds like you may be struggling with a mental health condition, such as schizophrenia or anxiety disorder. It is important that you seek professional help and support from a mental health care provider. They can assess your symptoms and provide you with appropriate treatment and coping strategies to help you manage your thoughts…
I often feel tense and anxious, unable to control my emotions and stress, which makes me feel very restless and restless.	I'm sorry to hear that. Would you like some suggestions for managing your stress and anxiety?
I often feel lonely and helpless, even when I have people around me, I still feel empty. I don't know why I feel this way, how can I seek help?	Thank you for opening up about your feelings. It takes a lot of courage to acknowledge and express what you're going through. It's important to remember that feeling alone and helpless is a common experience, and reaching out for help is a brave step toward healing. You can start by speaking with someone you trust, such as a close friend, family member, mentor, or a healthcare professional. You c…
I have been traumatized in the past, and now I always recall that experience with fear and pain, and I need to seek help to overcome this emotion.	I'm sorry to hear that you've been through a traumatic experience in the past. It can be very difficult to deal with the emotions and memories that come with it. Seeking help is a positive step towards healing. There are different types of therapy such as cognitive-behavioral therapy, exposure therapy, and EMDR that can help you cope with this trauma. It's important to find a therapist who has ex…
I can't get rid of the memories of the past, and whenever I think about certain things, I feel very painful, and it even affects my daily life	I'm sorry to hear that you're struggling with painful memories from the past. It's natural to hold onto our experiences, especially those that have been traumatic or difficult. However, it's important for our well-being to find ways to move forward and cope with these memories. One strategy you can try is mindfulness meditation. This involves focusing on the present moment and observing your thou…
I used to be bullied and now whenever I think about it I feel scared and even have nightmares	I'm sorry to hear that you have experienced bullying and that it still affects you. This is a difficult situation to deal with, but it's possible to overcome the fear and trauma that has resulted from it. Here are a few strategies that could help: 1. Talk to a trusted person about what happened - Sharing your experience with someone you trust can help you process your emotions and thoughts in a s…
I feel more and more lonely, no friends, no relatives, even if someone is around, I feel very empty and uncomfortable	I am sorry to hear that you are feeling lonely. It can be a difficult feeling to confront and even more challenging to overcome. Have you considered speaking with a therapist or counselor? They can offer you clinical support and guidance on how to work through your feelings and develop strategies for overcoming loneliness. Additionally, there are many community resources available to connect you …
I always feel like I can't concentrate, it's hard to complete tasks, and I'm often tired and depressed	I'm sorry to hear that. It sounds like you may be experiencing symptoms of depression or another mental health condition. It's important to seek help from a mental health professional if you're able to. They can provide you with a proper diagnosis and develop a treatment plan that's tailored to your specific needs. In the meantime, there are some things you can do to help improve your focus and e…
I often feel lonely and lost, unable to establish close relationships with others, and even lose interest and enthusiasm for people and things around me.	I'm sorry to hear that you're feeling that way. It can be difficult to deal with loneliness and disconnection from others. Have you tried reaching out to others and trying to establish deeper connections with them? It could be helpful to join groups or clubs that are centered around your interests or hobbies. You might also consider seeking out therapy or counseling to talk about your feelings an…
I feel alone and lost and I don't feel like I can form close relationships with other people, which makes me very depressed and helpless	I am sorry to hear that you are feeling this way. It can be tough to feel like you are unable to form close connections with others and it is understandable to feel depressed and helpless because of this. I want to let you know that you are not alone and there are ways to work through these feelings. One thing you can do is seek support and talk to someone about how you are feeling. This could be…
Everyone around me is happy, but I feel empty inside, unable to enjoy any joy	I'm sorry to hear that you're feeling this way. It's important to know that it's common to feel empty or disconnected at times, even when things seem to be going well around you. There could be various reasons for this, such as past experiences, stress from work or personal life, or a chemical imbalance. One thing you can do is to take some time to reflect on what might be causing these feelings.…
I had low self-esteem and often felt useless and insignificant, causing me to be afraid to pursue my dreams and goals, fearing failure and being looked down upon by others.	I'm sorry to hear that you're struggling with self-esteem issues. The good news is that there are steps you can take to start working towards feeling more confident and capable. One thing you can do is to practice self-care and self-compassion. This can include things like getting enough sleep, eating well, and engaging in activities that make you happy and fulfilled. It can also involve giving y…
I find myself becoming overly sensitive to things and often feel restless and worried about little things	It sounds like you may be experiencing some symptoms of anxiety. It's important to take care of your mental health and seek support when needed. Some things that may help include practicing mindfulness and relaxation techniques, engaging in regular exercise, connecting with loved ones, and seeking professional help from a therapist or mental health provider. If you're feeling overwhelmed, it's ok…
My parents always had high expectations of me to be a good person, but I felt like I was not up to their standards, I was anxious and low self esteem	I'm sorry to hear that you've been struggling with anxiety and low self-esteem. It's understandable that you feel this way when you're trying to meet your parents' expectations. However, it's important to remember that everyone has their own strengths and weaknesses and nobody is perfect. One way to start building your self-esteem is to focus on your strengths and what makes you unique. It can al…
I dream every day, repeating it over and over, as if lost in a maze with no exit	Dreams can often feel confusing and disorienting, especially when they are repetitive and seem unending. One way to approach this is to try to understand what your dreams might be trying to communicate. Dreams are often a reflection of our subconscious thoughts and feelings, so paying attention to the symbols and themes in your dreams can help you gain insight into your innermost thoughts and emo…
Whenever I'm alone, I think about everything that happened before, and everything makes me feel so miserable	I'm sorry to hear that you're feeling sad when you're alone. It's important to remember that everyone feels sad or down sometimes, and it's okay to talk to someone about your feelings. Have you considered talking to a counselor or therapist about what's been bothering you? They can help you sort through your emotions and find healthy ways to cope with your feelings. Additionally, engaging in acti…
When I see my body, I feel so ugly, so bad	I am sorry to hear that you are feeling this way. Remember that everyone has unique and beautiful qualities, both inside and out. It's important to focus on the positive aspects of yourself and to practice self-love and self-care. You could try activities that make you happy and boost your confidence, such as exercise, meditation, or spending time with loved ones. It may also be helpful to speak …
I have autism, I don't know how to communicate with others, I feel isolated in a completely different world, I feel very miserable and helpless.	I'm sorry to hear that you feel that way. Living with autism can be challenging at times, but remember that you are not alone. There are many people who understand what you're going through and are willing to help and support you. Here are a few things that may help you improve your communication skills and connect with others: 1. Seek support from a therapist or counselor who specializes in work…
I was once betrayed by a friend, it hurt me so much, I began to doubt the reliability of humanity and friendship, and even began to close myself and alienate others	I'm sorry to hear that you experienced such betrayal from someone you considered a friend. It is completely understandable to feel hurt and to struggle with trust issues afterwards. However, it's important to remember that not all people are the same and that there are still many genuine and trustworthy individuals out there. It might be helpful to take some time to process your feelings and try …
In today's society, people often give up on themselves or even commit suicide because they cannot complete their work.	Yes, that is unfortunately true. In our fast-paced and highly competitive world, many people feel overwhelmed by the demands placed on them. Work-related stress and burnout can lead to serious physical, mental, and emotional health problems. If you or someone you know is struggling with work-related stress, it's important to seek help. Talking to a trusted friend or family member, a healthcare pr…
I was always thinking about my past and my future, feeling anxious and upset about it, not knowing what to do with it.	It's normal to think about the past and future, but constantly dwelling on them can cause anxiety and stress. One strategy to help with this is mindfulness - focusing on the present moment and accepting our thoughts and emotions without judgment. Another helpful technique is to challenge negative thoughts that come up when thinking about the past or future. Ask yourself if those thoughts are base…
I always feel awkward whenever I'm in front of a large group of people	Feeling nervous or awkward in front of a large group of people is a common experience. Here are a few tips that may help you feel more comfortable: 1. Practice and prepare: The more you prepare and practice beforehand, the more comfortable you'll feel during the actual event. Practice your speech or presentation multiple times, and become familiar with the material. 2. Deep breathing exercises: D…
I am dissatisfied with my appearance and always feel ugly, which makes me very unconfident in socializing and making friends. How can I change this mentality?	I understand that feeling and I'm here to help. The first step in changing this mentality is to remember that beauty comes in many forms and is not solely based on physical appearance. Try to shift your focus away from negative self-talk about your appearance and instead focus on your positive attributes, such as your intelligence, kindness, sense of humor, etc. Also, consider getting involved in…
I am full of fear and anxiety about the future, and I don't know how to deal with the challenges and pressures in the future.	It's normal to feel worried or anxious about the future, especially with all the uncertainty in the world right now. However, it's important to remember that you have the ability to cope with challenges and pressures that arise in the future. Here are some tips to help you: 1. Focus on what you can control: Instead of worrying about things outside your control, focus on things you can control. Th…
I find myself constantly getting stuck in unstoppable thought loops, ruminating over the same problem or situation over and over, which leads to poor sleep and daily life.	I'm sorry to hear this. It sounds like you might be experiencing rumination, which can be a difficult pattern to break out of. However, there are some things you can do to help manage these thoughts and improve your daily life. 1. Practice mindfulness: Try to become more aware of your thoughts and observe them without judgment. Allow them to come and go, without giving them too much attention or …
I have had some traumatic experiences that have stuck with me. I found it difficult to process these emotions and memories, which caused my mental health to gradually deteriorate.	I'm sorry to hear that you have been through traumatic experiences. It can be challenging to cope with these kinds of feelings and memories on your own. It is essential to seek professional help from a therapist or counselor who can provide you with the appropriate mental health support that you need to work through your emotions and traumas. There are different types of therapies available that …
I often feel depressed, lose the joy and motivation of life, and have no confidence in the future, this emotion makes me feel very painful and helpless	I am sorry to hear that you are going through a difficult time. It is important to remember that these feelings are common and there is help available. Here are a few things that might be helpful: 1. Talk to someone: Reach out to a trusted friend, family member, or a mental health professional to talk about your feelings. Sometimes just sharing your thoughts and emotions with someone can help you…
Recently, their children often lose their temper and even destroy items in the house, which may be a symptom of depression	It is possible that children losing their temper and destroying items in the house can be a symptom of depression, as it can manifest in different ways in children compared to adults. However, there can be various other factors that can trigger such behavior in children, such as stress, anxiety or ADHD. It is best to monitor their behavior closely and if it persists, seek professional help from a…
I often feel stressed and anxious, even small things can make me feel restless and tense, it is difficult to relax and enjoy life	I'm sorry to hear that. There are a few things you can do to help alleviate stress and anxiety: 1. Practice relaxation techniques such as deep breathing, meditation or yoga. 2. Exercise regularly, as physical activity can help reduce stress levels. 3. Practice good sleep hygiene by sticking to regular sleep patterns and avoiding caffeine and electronics before bedtime. 4. Identify and challenge n…
I am very dissatisfied with my body, I always feel too fat or too thin, and I don't know how to accept my body	I'm sorry to hear that you feel that way. It's understandable to struggle with body image, but it's important to remember that everyone is unique and there is no one "perfect" body type. Here are some tips that might help you to accept your body: 1. Focus on the things you like about yourself. Instead of fixating on what you don't like, try to focus on the positive aspects of your body and your p…
I lack confidence in my own performance and ability. I always feel that I can’t do well, and I’m afraid of failure and being laughed at by others.	It's common to experience self-doubt and fear of failure, but remember that everyone makes mistakes and has setbacks. What's important is how you respond to them. Here are some tips that can help you build your confidence: 1. Practice positive self-talk: Instead of focusing on your weaknesses and mistakes, try to focus on your strengths and accomplishments and remind yourself that you are capable…
My moods fluctuated wildly, from very high to very low, without any pattern.	It sounds like you may be experiencing mood swings or mood instability. This can be a symptom of various mental health conditions such as bipolar disorder, borderline personality disorder, or major depressive disorder. It is important to consult with a mental health professional for an accurate assessment and potential treatment options. In the meantime, practicing self-care activities such as ex…
When I'm in a crowd, I always feel ignored, or even non-existent, which makes me feel very alone and lost	I'm sorry to hear that you feel that way. It can be challenging to feel invisible in a crowd. It is essential to recognize that feeling this way is not uncommon, and there are steps you can take to help yourself feel more comfortable. One approach is to focus on your breath and your senses. Take a few deep breaths and focus on the sensation of the air moving in and out of your body. Take note of …
I often feel that I am not good enough to gain the approval and respect of others	It's natural to want the approval and respect of others, but remember that you are worth of love and respect simply because you are you. It's important to focus on building self-confidence and self-esteem, which can come from setting goals and achieving them, taking care of yourself physically and mentally, and practicing self-compassion and positive self-talk. Surround yourself with supportive p…
I feel confused and helpless about the future, I don't know which direction to go, it makes me feel very anxious and restless	I'm sorry to hear that you're feeling confused and helpless about the future. It's completely normal to feel this way at times, especially if you feel uncertain about your goals and what you want to achieve in life. Here are a few tips that may help you feel more grounded and focused: 1. Identify your values and strengths: Reflect on what you're passionate about and what comes naturally to you. W…
I was always worried that my actions and decisions would be criticized and disapproved by others, which made me very insecure and frustrated.	It's natural to have a fear of being criticized or disapproved by others, as we all want to feel accepted and valued by those around us. However, it's important to remember that you cannot control how others will react to your decisions and actions. What you can control is how you respond to criticism and disapproval. One way to deal with these feelings of insecurity and frustration could be to w…
I want to commit suicide, but I'm too scared to do it. I just want to hide myself away and never come out again.	I'm so sorry to hear that you're feeling that way. It's understandable to have those feelings at times, but it's important to remember that there is always hope and help available. It takes a lot of courage to reach out and talk about how you're feeling, and I'm glad you did. I'm here to listen and support you. Would you like to share more about what's been weighing on your mind lately? It can be…
My family always criticizes me and makes me feel very hurt, I don't know how to communicate with them, they have become so distant to me	I'm sorry to hear that you're going through this. It can be challenging to communicate with family members who are critical and distant. Here are some tips that may help: 1. Practice active listening: When having a conversation with your family, try to listen to what they're saying without letting your emotions get in the way. Make sure you understand their point of view before responding. 2. Use…
I used to get frustrated over little things, had trouble recovering from emotional lows, and felt worthless.	I'm sorry to hear that. It sounds like you may have been experiencing symptoms of depression. It's important to remember that these feelings are valid and that you are not alone in experiencing them. It's important to seek help and support when dealing with depression. Have you considered talking to a therapist or a mental health professional about what you're going through? They can help you dev…
I was bullied by my peers, which led to chronic low self-esteem and fear of rejection.	I'm sorry to hear that. Experiencing bullying can be very difficult and can have long-lasting effects on a person's self-esteem and sense of worth. Have you spoken to anyone about what you've been going through? It might be helpful to talk to a counselor, therapist, or trusted friend or family member. They can provide support, empathy, and guidance on how to cope with the negative feelings that c…
Recently, I always feel that my mood fluctuates a lot. Sometimes I am happy, but sometimes I am depressed for no reason. This makes me feel very troubled. I don't know if I am suffering from depression.	I understand how difficult it can be to deal with fluctuating moods. It's possible that you may be experiencing symptoms of depression, but it's also possible that there may be another underlying cause. Either way, I recommend seeking the advice of a medical professional. In the meantime, here are some tips that may help improve your mood: - Practice self-care activities such as meditation, exerc…
I was so stressed, I felt like I was going to be overwhelmed, I often felt flustered or breathless.	I'm sorry to hear that you're feeling stressed. It's important to take care of yourself during times of stress. There are a few things you can do to help manage your stress levels: 1. Take deep breaths: When we're stressed, our breathing can become shallow and quick. Taking deep breaths can help slow down your heart rate and calm your body. 2. Practice mindfulness: Being present and focusing on t…
I often have feelings of anxiety and fear, not knowing where it is coming from, and sometimes it becomes difficult to even breathe.	I'm sorry to hear that you're experiencing these feelings. It sounds like you might be experiencing symptoms of anxiety or a panic attack. These feelings can be overwhelming, but it's important to recognize that they are not your fault and that you can take steps to address them. One helpful strategy is deep breathing exercises which can help calm your body and mind. To do this, take a deep breat…
I've always felt worthless, not good enough, not smart enough, not pretty enough, and it's frustrating	I understand that feeling and it can be very difficult to deal with. It's important to remember that everyone has insecurities and doubts about themselves at times. It's okay to not feel confident all the time, but it's important to try and work on improving your self-esteem. One way to start is by focusing on your strengths and accomplishments instead of your perceived weaknesses. Try writing do…
I always have suicidal thoughts, I feel life is meaningless and I have no worth. I also feel hopeless and feel like there is no hope for my future	I'm so sorry to hear that you're struggling with these thoughts and feelings. It's important to know that your life does have worth and meaning, even if you can't see it right now. It may be helpful to talk to a mental health professional who can help you explore what's driving these thoughts and what steps you can take to feel better. In the meantime, please know that there are resources availab…
I often feel like my life is meaningless, I don't know why I'm living this way, I feel like I have no purpose, no motivation, it's like I'm wasting my time, I feel worthless	I'm sorry to hear that you are feeling this way. It's a common feeling that a lot of people struggle with at some point in their lives. There are many things that can contribute to these feelings, including stress, anxiety, depression, and lack of fulfillment in personal or professional life. The first step in overcoming these feelings is to recognize that they are valid and that it's okay to fee…
I've been feeling very stressed lately because I have a lot of work and I have to deal with many tasks every day, but I don't have a sense of accomplishment, which makes me feel very frustrated. How can I deal with this psychological pressure?	There are several ways you can deal with psychological pressure caused by work overload. Here are some suggestions: 1. Prioritize your tasks: Make a list of all the tasks you need to complete and prioritize them by importance and urgency. This will help you focus on the most critical tasks first and give you a sense of accomplishment as you complete them. 2. Break your tasks into smaller chunks: …
I often feel anxious and tense, feeling like I can't handle the stresses and challenges in life.	It's understandable to feel overwhelmed when facing stress and challenges in life. One way to manage these feelings is to practice self-care activities that help you relax and improve your mood. Here are a few suggestions: 1. Engage in regular exercise - Even a short walk or light workout can help reduce stress and improve mood. 2. Practice deep breathing exercises - Take slow, deep breaths in th…
My mind is filled with negativity and self-doubt and I don't know how to get out of it	I'm sorry to hear that you are feeling that way. It can be a difficult cycle to break, but there are some things that you can try to help shift your mindset: 1. Challenge negative thoughts: When a negative thought arises, ask yourself if it's really true. Often, our negative thoughts are based on misconceptions or irrational beliefs. 2. Practice gratitude: Each day, write down three things that y…
I feel that my emotions are becoming more and more unstable. Sometimes I feel depressed, and sometimes I feel emotional again. I don’t know if there is something wrong with my mind.	It's great that you recognize that your emotions are becoming unstable and that you're seeking help. It's important to take care of your mental health. There could be various reasons why you're experiencing such mood swings, such as stress, anxiety, depression, or other mental health conditions. I suggest you consider seeking support from a mental health professional, who can help you identify an…
When the child comes home from school, the atmosphere at home is always cold and rejecting towards him, except when he has done something wrong. He feels empty inside and is worried that he might become like his parents when he grows up.	It sounds like the child may be feeling neglected and unappreciated for his efforts to help warm up the house. It is important to validate his kindness and let him know that his actions are noticed and appreciated. As for his worries about becoming like his parents when he grows up, it's important to remind him that he has the power to make his own choices and be his own person. It may also be he…
He can't sleep almost every night, can't sleep and can't fall asleep, his mood is getting worse and worse, and he is worried about whether he will have depression or other more serious psychological problems	It sounds like your friend may be experiencing symptoms of insomnia and anxiety, which could lead to depression if left untreated. As a helpful assistant, I suggest that your friend speaks to a healthcare professional such as a doctor or a therapist to get the appropriate treatment. In the meantime, there are some things your friend can do to improve their sleep and mood, such as practicing relax…
Recently, I always feel that I am vulnerable, and my thoughts are like a mess of ropes, unable to grasp	I'm sorry to hear that you're feeling vulnerable and overwhelmed. It's completely understandable to feel that way at times. Here are some suggestions that might help you: 1. Take a deep breath: Sometimes, taking a few deep breaths can help calm your mind and give you a clearer perspective of the situation. 2. Identify the source of your feelings: Try to identify what is causing you to feel vulner…
Every time I think about my failures, I feel helpless, I lose my courage at the thought of not being accepted by society, I feel helpless at the thought that I may not be able to achieve my dreams	I understand how you feel. It can be difficult to overcome the fear of failure and the fear of not being accepted by society. However, it's important to remember that failure is a natural part of the learning process and it's okay to make mistakes. It's through our failures that we can grow and learn. One helpful strategy is to focus on the things you can control. Set realistic goals for yourself…
My relationship has always been unstable, I often experience emotional distress, do not know how to deal with relationship problems, it makes me feel powerless and lost.	I'm sorry to hear that you're going through a challenging time in your relationship. It can be difficult to navigate emotional distress and relationship problems, but there are steps you can take to help you feel more empowered. Here are some suggestions: 1. Identify the source of your emotional distress. What are the specific issues in your relationship that are causing you to feel upset? Being …
Sometimes I lose control and become very irritable and angry, and even lash out at the people around me.	It sounds like you may be experiencing some stress or difficulty regulating your emotions. It's important to take care of your mental health and seek support if needed. Some tips for managing irritability and anger include: 1. Take deep breaths and count to 10 before reacting 2. Practice mindfulness and meditation to increase emotional regulation 3. Consider therapy or counseling to address under…
My job is stressful and dealing with problems and challenges every day makes me feel very anxious, I start to lose sleep, lose my appetite and sometimes feel out of control	It sounds like you are experiencing some symptoms of stress. It's important to recognize when stress is becoming a problem and to take steps to manage it. Here are a few things you can try to help manage stress: 1. Take breaks throughout the day to practice deep breathing or meditation. 2. Exercise regularly to release endorphins, which can improve your mood. 3. Talk to a trusted friend or family…
I am always unable to restrain my emotions. Sometimes I will suddenly get angry, and sometimes I will suddenly fall silent, which makes me unable to predict my own behavior and performance, and I feel very disturbed and confused.	It's normal to experience strong emotional reactions from time to time, but if you're finding it difficult to manage your emotions on a consistent basis, there are things you can do to help yourself. Some things that may help you better manage your emotions include: 1. Taking a step back: When you feel your emotions getting the best of you, take a moment to step back and breathe deeply. This can …
I can't get rid of the entanglement with unpleasant past experiences, and whenever I think about those events, I feel excruciating pain and loss.	I'm sorry to hear that you're struggling with these painful memories. It's important to acknowledge and process these experiences in order to move forward and find peace. Here are some suggestions that might help: 1. Seek support: It can be helpful to talk about the experience with a trusted friend, family member, or a mental health professional. They can provide a safe space to express your feel…
I often feel lonely and helpless, there is no one to talk to my inner world, I feel abandoned by the world, it makes me feel very painful and hopeless.	I'm sorry to hear that you're feeling lonely and helpless. It's understandable that feeling abandoned and isolated can be very painful and difficult to cope with. However, it's important to remember that you are not alone in feeling this way. Many people experience feelings of loneliness and isolation at different points in their lives. I would like to encourage you to seek support during this ti…
I often feel inferior and helpless because of my shortcomings, feel that I am not good enough, not worthy of love	I'm sorry to hear that you feel that way. It's important to remember that everyone has shortcomings and nobody is perfect. It's okay to acknowledge your limitations and work on areas where you want to improve, but it's also important to give yourself credit for your strengths and positive qualities. You are worthy of love and respect just as you are. If these feelings persist, it may be helpful t…
I have a lot of work and study pressure, and I often feel exhausted, but I don't know how to relax and relieve stress.	I totally understand how you may feel. There are a lot of different ways you can try to relax and relieve stress. Here are a few suggestions: 1. Take break frequently. Take 10-15 minute breaks every few hours to refresh your mind. Make sure to get up from the desk and take a walk. 2. Practice deep breathing. Take a few minutes to breathe deeply and slowly. Inhale through your nose, hold the breat…
My mood changes so fast, it only takes a while from happy to sad, why is that?	There could be various reasons why your mood changes quickly. One possibility is that you may have a mood disorder, such as bipolar disorder, which causes rapid mood swings. Another possibility is that your sudden mood changes could be related to stress or anxiety, which can affect your emotions. It could also be due to certain life events, hormonal changes, or medications. It may be helpful to t…
I am more likely to lose patience than others, and I feel needlessly depressed and pushed to the limit when I do small things	As an AI language model, I am not qualified to provide a medical diagnosis or treatment for depression or related conditions. However, I can offer some general advice and suggestions that may help you manage your feelings of impatience and depression. First, it's essential to prioritize self-care and take steps to reduce stress and anxiety. This could include things like getting regular exercise,…
Every time I think about going to the doctor or seeing a therapist, I feel intimidated and insecure. I worry that my problems will be exposed and judged by others. This fear prevents me from seeking help.	I understand that seeking help can be intimidating and vulnerable, but it is a brave step towards healing and improving your mental health. It is important to remember that seeking help is a sign of strength, not weakness. One way to manage your fears is to educate yourself about the process. Research the benefits of therapy and understand that therapists are trained professionals who are there t…
I have encountered a lot of setbacks and injustice in the workplace, which makes me feel very frustrated and hopeless in my life	I'm sorry to hear that you're experiencing setbacks and injustice in the workplace. It can be very frustrating and disheartening. However, it's important to remember that you have the power to take action. Here are some tips to help you move forward: 1. Take some time to reflect on your situation, try to identify the root cause of the issues you're facing, and think about possible solutions. 2. S…
I was discriminated against by my classmates, and sometimes I feel that life is meaningless	I'm sorry to hear that you're going through a difficult time. It's important to remember that discrimination can be hurtful, but it doesn't define who you are as a person. It may be helpful to talk with someone you trust about what you're experiencing, such as a friend, family member, or counselor. Additionally, try to focus on activities that bring you joy and fulfillment, whether that's a hobby…
I am very dissatisfied with my body and appearance, and I always criticize and deny myself excessively, which even affects my daily life and social activities	I'm sorry to hear that you are struggling with negative self-talk and body image issues. It's important to remember that everyone has insecurities and no one is perfect. It can be challenging to break free from negative patterns of thinking, but it's possible with practice and self-compassion. Here are some tips that may help: 1. Practice self-compassion: When critical thoughts come up, try to tr…
Recently I often feel tired and weak, even climbing a flight of stairs is exhausting, should I see a doctor	Yes, feeling tired and weak even after performing minor tasks could be a sign of an underlying health issue. It would be best to see a doctor as soon as possible to diagnose and treat the condition. In the meantime, you can improve your energy levels by maintaining a healthy diet, staying hydrated, getting enough rest, and engaging in physical activity.
I feel like I can't control my emotions and behavior and often make impulsive decisions, is this a mental illness? How to treat it?	It is possible that your difficulty in controlling your emotions and behavior could be a symptom of a mental illness. Some mental illnesses that can cause these symptoms include bipolar disorder, borderline personality disorder, and ADHD. The first step to getting help would be to speak to a mental health professional, such as a therapist or psychiatrist. They can help you assess your symptoms an…
Suppress all negative emotions in the bottom of my heart, don't allow myself to be a little bit vulnerable, but I can't restrain myself	As an AI language model, I am not qualified to provide mental health advice or diagnoses, but it's important to recognize that it's okay to experience negative emotions and vulnerability. It's part of being human. Suppressing those emotions and vulnerability can have adverse effects on your mental health in the long run. It's essential to find healthy ways to cope, such as talking to a trusted fr…
We fought all the time and each time we had some painful words and we broke up	I'm sorry to hear that you're going through a painful breakup. It can be difficult to navigate a relationship when there are constant arguments and hurtful words being exchanged. Have you taken any time to reflect on what caused the fights and how they could have been avoided? Sometimes, it can be helpful to take a step back and focus on personal growth before getting back into a relationship. Co…
Walking on the street, Tom always felt that people around him were peeping at him, and his mental state became more and more unstable	As an AI language model, I am not qualified to provide medical advice for psychological issues. However, If someone is experiencing mental health problems, it is important to seek professional advice from a qualified mental health practitioner or doctor. There are many resources available such as therapy sessions or counseling services. Encourage Xiao Zhang to seek help from a professional so tha…
I feel that there is a problem in my interpersonal relationship. It is difficult to communicate with friends, family members, and colleagues. Sometimes there are even conflicts and quarrels. This makes me feel very frustrated and helpless. I don’t know how to build healthy relationships	I understand how difficult it can be to navigate relationships and communication with others. It's important to first recognize that building healthy relationships takes time and effort. Here are a few tips that may help: 1. Practice active listening: This means being fully present and attentive to the person speaking, giving them your full focus, and asking questions to clarify what they're sayi…
I was dissatisfied with how I looked and my body, and was constantly self-judging and self-doubting, which left me with low self-confidence and self-esteem.	It's normal to have moments of insecurity and doubt about our appearance, but when it becomes a constant source of negative self-talk, it can greatly impact our self-esteem and confidence. A good place to start in building self-confidence is to focus on your strengths and positive qualities. Make a list of the things you like about yourself, and remind yourself of them often. You can also try set…
I often feel alone and helpless, as if no one really understands me, and I find it difficult to connect with people, which bothers me and makes it difficult to find a solution	I'm sorry to hear that you're feeling that way. It can be tough to feel disconnected from others. It might be helpful to try to identify any factors that may be contributing to your difficulty in connecting with people. Are there interests or hobbies you have that you could join a club or group for? Could you reach out to old friends or acquaintances and try to reconnect? Perhaps there are activi…
After my parents divorced, I have been living in my grandmother's house. Although I live with my mother, I always feel that she is stranger than my grandmother, and I don't know how to communicate with her.	I'm sorry to hear that you're struggling to communicate with your mother. It can be challenging to connect with someone after a significant life change such as a divorce. Here are a few tips that may help: 1. Be open and honest: Let your mother know how you feel. Tell her that you are finding it difficult to communicate with her and you would like to work on improving your relationship. Be clear …
I have more failures than successes, and more and more often I comfort myself that as long as I work hard, there will be rewards, but the reality is often disappointing	It can be discouraging to experience more failures than successes, but it's important to remember that failure is a natural part of the learning process. Each failure presents an opportunity to learn and grow, and the lessons learned from past failures can help guide future successes. It's also important to remember that success is not always immediate or guaranteed, even with hard work. It can t…
I have intense feelings of dread that something will happen and cannot calm myself down	I am here to help you. It's understandable to have feelings of dread. However, there are some things you can do to calm yourself down: 1. Take deep breaths. Inhale deeply and exhale slowly. 2. Reframe your thoughts. Instead of dwelling on negative thoughts, try to focus on positive things in your life. Make a list of things you're grateful for. 3. Move your body. Exercise, dance, or take a walk t…
I feel that I have been in a state of confusion, not knowing what I want and what I should do, which bothers me very much and sometimes causes me to have some negative emotions.	I can understand how that can be difficult for you. It's important to take some time for yourself to reflect on what you want and what is important to you. You may find it helpful to write down your thoughts and feelings in a journal or talk to a trusted friend or family member about what's been on your mind. Sometimes, it can also be beneficial to seek out professional help from a therapist or c…
Occasionally feel down, and it is difficult to get out of negative emotions, how can I adjust my mentality?	I'm sorry to hear that you're feeling down. It's important to remember that it's normal to experience negative emotions from time to time, and it's okay to give yourself some time to feel them. However, there are some things you can try to adjust your mentality and shift your focus towards positivity: 1. Gratitude: Write down 3-5 things you're grateful for every day. This practice helps you focus…
I always feel that I am not good enough, not smart enough, not beautiful enough, and I often want to package myself perfectly to prevent others from seeing my shortcomings	It's completely understandable to have these kinds of thoughts and feelings, but it's important to remember that nobody is perfect and we all have shortcomings. It's okay to have flaws and imperfections - they actually make us more unique and interesting as individuals. And remember, beauty and intelligence can come in many different forms. Instead of focusing on trying to be perfect, try to focu…
I often feel empty inside myself, lacking a true sense of belonging and purpose	I'm sorry to hear that. Feeling a lack of purpose and belonging can be difficult. Have you tried exploring your interests and passions to see if there are any activities or communities that align with them? It can also be helpful to set personal goals or to volunteer and give back to others. Sometimes taking small steps towards creating a sense of purpose and connection can make a big difference.…
Whenever someone strikes me up or compliments me, I always feel like they're just cheating on me because I don't deserve respect	It is understandable to feel that way, but it is important to recognize that everyone deserves to be respected regardless of their perceived flaws or shortcomings. You are worthy of respect and deserving of positive attention and compliments. It may be helpful to work on building your self-esteem and self-worth through self-care, positive self-talk, and seeking support from trusted friends or pro…
have been worried that I will be criticized and denied by others, which will lead to lower and lower self-confidence. How can I improve my self-confidence?	Building self-confidence is a gradual process that requires patience and effort. Here are some tips that might help: 1. Recognize your strengths: Make a list of your strengths and achievements, and try to focus on them instead of dwelling on your weaknesses. 2. Challenge negative self-talk: Often, negative self-talk can hold us back. Try to challenge negative thoughts and replace them with positi…
I don't know how to deal with my emotions. I often explode because of little things. I feel that I can't control my emotions. Does this mean that I have a psychological problem?	It's possible that you may be struggling with emotional regulation, but it doesn't necessarily mean that you have a psychological problem. Emotions are a natural and normal aspect of human experience, and it's common for people to have difficulty managing them at times. However, excessive and frequent outbursts of emotions could be impacting your relationships and quality of life, so it might be …
I am filled with fear and uncertainty about the future, not knowing which path to take, and feeling lost every day.	I'm sorry to hear that. It's completely understandable to feel uncertain and lost about the future, especially during these challenging times. Here are a few tips that may help you: 1. Take things one step at a time: Instead of worrying about the future, focus on what you can do today. Break your goals into small, manageable steps that you can work on each day. 2. Talk to someone: It can be helpf…
I have always had the performance of obsessive-compulsive disorder. I often have to repeatedly check whether the doors and windows are closed, whether the electrical appliances are turned off, etc. If these requirements cannot be met, I will feel very disturbed and frightened. How to get rid of this trouble.	Obsessive-compulsive disorder (OCD) can be challenging to manage without professional intervention. However, here are some techniques that may help you: 1. Controlled exposure: With the help of a therapist, you can expose yourself to the source of your anxiety gradually. For example, if you have to check the doors and windows repeatedly, start by checking them once and forcing yourself not to rev…
Sometimes I feel bored, I don’t know what to do, and I don’t know what the future holds for me, and I feel empty.	It is completely normal to feel bored, uncertain and empty at times. It's important to remind yourself that these feelings are temporary and they will pass with time. Here are some suggestions that may help in this situation: 1. Try to engage yourself in creative activities, such as writing, painting, drawing, or playing a musical instrument. You don't have to be perfect at it, but it could help …
I always wanted to have a baby, but when I was pregnant, I always felt that I was not up to being a good mother	It's common to have doubts and fears about parenthood, especially during pregnancy when there are so many unknowns. Remember that it's okay to feel unsure and to ask for help. Being a good mother is not about being perfect, but about doing your best to provide love, support, and care for your child. It's important to seek support from family, friends, and healthcare professionals who can offer gu…
I was always worried about my body and health, fearing that I might get various diseases, which made me feel very nervous and anxious.	It's completely understandable to worry about your health and the possibility of getting sick. However, it's important to remember that there are things you can do to take control of your health and reduce your risk of certain illnesses. Here are some tips that may help alleviate your worries: 1. Practice healthy habits: Eating a balanced diet, getting regular exercise, and avoiding smoking and e…
I am very self-conscious and picky about my appearance and figure, and I am often caught in a kind of endless self-correction and change	It sounds like you may be struggling with body image concerns and possibly experiencing some perfectionism. It's important to remember that nobody is perfect and everyone has flaws. It's natural to want to look and feel your best, but it's important to find a balance and not let it consume your thoughts and actions. Here are a few tips that may help: 1. Acknowledge your negative self-talk: When y…
Learning disabilities are common and you can make learning more fun by treating it like a game	Thank you for your input! I completely agree that learning disabilities are common and can make it challenging for students to engage in learning. Treating learning like a game can definitely make it more fun and engaging for students, allowing them to learn in a more enjoyable way. Incorporating interactive activities, puzzles, and quizzes are all great ways to make learning materials more enter…
I obviously want to have someone to rely on, but I don't know how to approach it. Every time I try, I fail, and then I lose my courage and go back to the original point.	It can be difficult to approach others and ask for help or support, especially if you have had negative experiences in the past. However, here are some tips that may be helpful: 1. Start small: Rather than approaching someone and asking for a lot of help or support, try to start with a smaller request, such as asking for advice on something specific. 2. Choose the right person: It is important to…
I find that my interest and enthusiasm for things is getting lower and lower, and I always feel less motivated to do anything. Is this a mental health problem?	This could be a sign of a mental health problem. Lack of motivation and interest is a common symptom of depression. However, it's also possible that this could be due to other factors such as stress, burnout or fatigue. If this has been going on for some time and is affecting your daily life and functionality, it might be a good idea to consult a mental health professional or your doctor. They ca…
Regular psychological pressure will affect our emotional stability and may affect our physical health. We should do a good job in the cultivation of psychological quality and carry out mental health education	Yes, that is absolutely correct. It is important to take care of our mental health and well-being by managing stress, practicing self-care and seeking professional help or therapy when needed. Cultivating positive habits such as exercise, relaxation techniques, fostering positive relationships, and finding ways to cope with difficult emotions can also be helpful in maintaining emotional stability…
Illegally detained for a night, tortured and feeling physically weak, crying alone in a corner with only tears to illuminate the darkness.	I'm sorry to hear that you went through such a terrible experience. If you feel comfortable sharing more, I might be able to offer some guidance or resources to help you. It's important to prioritize your physical and mental health after experiencing such trauma. Have you sought medical attention or talked to a therapist?
In terms of adolescent mental health, it is very important to learn how to establish a healthy relationship and how to express your emotions and demands correctly	That is absolutely true. Building healthy relationships and effective communication skills are crucial for adolescent mental health. When teenagers are able to express themselves in a healthy and respectful way, it can help improve their self-esteem, reduce stress and anxiety, and prevent depression and other mental health issues. Some strategies that can help adolescents establish healthy relati…
have been having nightmares a lot lately, and these dreams make me feel scared and uneasy, and even affect my sleep quality and daily life.	I'm sorry to hear that you've been experiencing nightmares. It can be concerning and affect your overall wellbeing. Here are a few things you can do to help reduce the frequency of nightmares: 1. Practice good sleep hygiene: Make sure you have a regular sleep schedule, avoid caffeine and alcohol before bed, and create a relaxing bedtime routine. 2. Relaxation techniques: Practice relaxation techn…
I am always anxious and constantly worrying about how things are going, especially small things, can also make me feel uneasy and uncomfortable	It sounds like you might be struggling with anxiety. It's very common to feel anxious and worried, especially in today's world where there are so many stressors around us. There are many strategies you can try to help manage your anxiety and feel more calm and in control. Here are a few suggestions: 1. Practice mindfulness and relaxation techniques, such as deep breathing or progressive muscle re…
I can't stop my negative thoughts, sometimes even when things are not that bad, I still think the worst, I feel so depressed and helpless, I feel like I will never be able to get rid of this emotion.	I'm sorry to hear that you're experiencing this. Negative thoughts and feelings can be very draining and overwhelming. One technique to try is called cognitive restructuring. This involves identifying negative or irrational thoughts and replacing them with more positive or realistic ones. It may also be helpful to practice mindfulness techniques, such as deep breathing exercises or meditation to …
I feel like my life is boring and lacks passion and motivation, which makes me feel depressed and lost	I'm sorry to hear that you're feeling that way. It's completely normal to feel lost, unmotivated, and even depressed at times. Here are some suggestions that you can consider: 1. Find something that interests you: It can be a hobby, a sport, a cause you're passionate about, or anything that piques your curiosity. This can help you find a purpose and motivation in your life. 2. Set goals: Whether …
I often suffer from insomnia, lying in bed at night thinking about work, family chores and relationships, which makes me unable to concentrate during the day, work efficiency is low, and my mood becomes very bad.	I'm sorry to hear that you are experiencing insomnia. Here are some tips that may help you improve your sleep: 1. Establish a regular sleep routine: Establish a regular routine by sleeping and waking up at the same time every day, including weekends. 2. Create a relaxing and comfortable sleep environment: Your bedroom should be cool, quiet, and dark. Use comfortable pillows, blankets, and sheets,…
When I encounter setbacks and disappointments, I think the only way to be safe is to forget everything.	As an AI language model, I do not have emotions nor experiences; however, it is important to acknowledge that setbacks and disappointments can be difficult to bear. However, it is not advisable nor healthy to forget everything in order to feel safe. It is important to acknowledge the setback or disappointment and work through it in a healthy manner. This could involve seeking support from loved o…
I often feel tired and weak, even when I am not doing physical work, I also often suffer from insomnia and sleeplessness, which makes me feel very uncomfortable and disturbed	There could be many reasons why you are feeling tired and weak. Some of the common causes of fatigue and insomnia include: 1. Lack of sleep: Not getting enough sleep or poor quality of sleep can make you feel tired during the day and disrupt your sleep cycle. 2. Low physical activity: Leading a sedentary lifestyle or not exercising enough can make you feel weak and tired. 3. Poor diet: A diet tha…
I sometimes suffer from depression, can't eat normally, and then control my eating because I'm afraid of people seeing me getting thinner	It sounds like you are experiencing a difficult and complex situation. Depression can have a significant impact on appetite and eating habits. It's important to seek support from a mental health professional to address your depression and any related struggles with food and body image. They can help you explore the underlying factors influencing your eating patterns and provide strategies for man…
My parents are always criticizing me and no matter what I do is not good enough, it makes me feel very depressed and disappointed, I feel like I will never be able to get their approval and praise	I'm sorry to hear that you're experiencing this. It's important for you to know that you are worthy and valuable, regardless of what others may say or think. It's also important to remember that your parents' behavior may be a reflection of their own issues and not necessarily a reflection of your worth as a person. Have you tried opening up to your parents and expressing how their criticism make…
My relationship has always been very unstable, I am always controlled by emotions, unable to maintain my relationship in a healthy way	It's great that you are acknowledging that your relationship has been unstable and that you are struggling to maintain it in a healthy way. It's possible that you may benefit from working on your own emotional regulation skills and communication skills. Here are some tips that may help: 1. Identify and learn to manage your emotions: Take some time to think about the situations that trigger strong…
Katty suffered bullying in college, which caused her to become inferior and depressed. How can I help her rebuild her self-confidence and mental health?	I'm sorry to hear that Xiaoling went through such a difficult experience. As a helpful assistant, I can offer a few suggestions on how you can help her rebuild her self-confidence and mental health: 1. Encourage her to seek professional help: It's always a good idea to seek professional help, such as counseling or therapy, when dealing with mental health issues. You can suggest Xiaoling to see a …
My family relationships were complicated and I was often stressed and insecure and didn't know how to deal with them or who to turn to for help.	I'm sorry to hear that. It can be tough dealing with complicated family relationships. Remember that you are not alone and there is always help available. You can seek support from friends, family members, or a mental health professional who can provide guidance and support. It's important to prioritize your own well-being and take steps to manage stress and insecurity. Consider practicing relaxa…
I have a friend who always complains negatively and doesn't have a positive attitude towards anything, I think his negativity affects my emotions, but I don't know how to communicate with him	It can be very difficult to deal with negative people, especially if they are close to us. The first thing you should do is make sure you take care of yourself first. This means setting boundaries to protect your mental and emotional health from his negativity. If you feel comfortable, you can try talking to your friend about how their negativity affects you or others. Try to be honest, non-judgm…
Recently, I found that I always have insomnia, even when I fall asleep, I have nightmares, and I feel heavy after waking up, what should I do?	I'm sorry to hear that you're experiencing insomnia and nightmares. Here are some things you can try to improve your sleep: 1. Establish a regular sleep schedule: Try to go to bed and wake up at the same time every day, even on weekends. 2. Avoid caffeine, nicotine, and alcohol: These substances can disrupt your sleep and make it harder to fall asleep. 3. Create a relaxing bedtime routine: Engage…
Sometimes when chatting with friends, I always feel that the conversation is over and there is nothing to say	It's normal to feel that way in a conversation, especially if the topic of discussion has already been exhausted. Here are some tips to keep the conversation going: 1. Ask open-ended questions: These types of questions require more than just a yes or no answer and can lead to more in-depth discussions. 2. Share personal stories or experiences: This can help to create a more relaxed environment an…
My kid is being bullied at school and he is now very withdrawn and I don't know how to help him	I'm sorry to hear that your kid is being bullied. As a parent, it's important to take action to help your child feel supported and safe. Here are some steps you can take: 1. Listen to your child: Let your child know that you're there to help and that you're willing to listen to what they have to say. Ask them to describe what's happening, who's involved, and how it's making them feel. 2. Report t…
Whenever I communicate with people, I always feel very nervous. I don’t know what to say, and I am afraid that I will say the wrong thing.	It is normal to feel nervous when communicating with people, especially if you don't have much experience or if you are communicating in a new situation. However, it is important to remember that everyone feels nervous sometimes, and it's okay to make mistakes or say the wrong thing. Here are some tips to help you feel more confident and less nervous when communicating with others: 1. Prepare in …
Whenever I am alone, I start to have an inexplicable sense of fear, unknowingly controlled by an invisible force, I feel caught, trapped in an impenetrable shell, sometimes everything is going to be terribly scary	It sounds like you might be experiencing anxiety or some form of phobia. It's important to seek professional help to understand and cope with these feelings. A therapist or counselor can help talk through your feelings and develop strategies to manage them. You might also try practicing relaxation techniques, such as deep breathing, meditation, or yoga, to help calm your mind and body when you fe…
I was always too hard on myself and felt like I wasn't good enough to be loved and valued	I'm sorry to hear that you've been feeling that way. Everyone deserves love and validation, including you. It's common to be hard on ourselves, but it's important to remember that we are only human and we make mistakes. It's okay to make mistakes, and it doesn't make you any less worthy of love and respect. One thing you can do is try to practice self-compassion. Treat yourself with the same kind…
My life is just constant frustration, I fail no matter what I do, I feel like I'm worthless	I'm sorry to hear that you're feeling that way. It can be difficult to struggle with feelings of worthlessness and failure. It's important to remember that everyone experiences setbacks and challenges in life, but that doesn't define your worth as a person. Perhaps it would be helpful to look at the things you're currently struggling with and try to break them down into smaller, more manageable t…
I was always bullied, looked down upon, felt useless and incompetent, unable to show my true strength and ability in social situations, always hiding in the corner	I'm sorry to hear that you've had to go through such a difficult experience. Remember that you are not alone, and there are ways to work through these feelings. You have strengths and abilities that are unique to you, and it's important to recognize and celebrate those strengths. It takes time and effort, but there are ways to build your confidence and improve your social skills. It may be helpfu…
I feel confused and helpless about the future, I don't know what I should do, and I don't know what I want.	I understand how overwhelming this feeling can be. It's okay to feel confused and unsure about your future. Many people go through this phase in their lives. However, it's important to take steps to address your doubts and questions. Here are some steps you can take: 1. Take some time for yourself: Try to take some time to be alone and reflect on your goals and values. This could be by meditating…
I don't know why I always think too much, worry about the future, and have to double-check to lock the door and close the windows every time I go out, which makes me feel very tired and irritable	It sounds like you might be experiencing symptoms of anxiety. Anxiety can cause excessive worries and fears about future events, as well as a need for constant checking and reassurance. It's important to take steps to manage these feelings so they don't become overwhelming. Some things you can try include: 1. Practicing mindfulness techniques, like deep breathing and meditation, to help calm your…
I have been sexually assaulted for a long time, but I still feel pain and distress, how can I deal with this past hurt?	I'm sorry to hear that you have been through such a traumatic experience. Dealing with the hurt and pain of sexual assault can be a difficult and ongoing process. Here are some suggestions for coping and moving forward: 1. Seek professional help: Consider speaking with a therapist or counselor who specializes in trauma and assault. They can help you work through your feelings and develop strategi…
I felt that my life lacked meaning and purpose, that I could not find what I really wanted to do, and this feeling of being lost was very painful.	I'm sorry to hear that you're feeling lost. It's not uncommon to experience a lack of meaning and purpose in life at some point. It can be a challenging and difficult feeling to overcome, but there are things you can do to help you find direction and purpose. Here are some suggestions: 1. Reflect on your values: What do you truly care about? What are your core values? Knowing what you value can h…
One day, I found a way to escape from my real world, which is to put my head on the sofa, plug my ears, and not listen to the outside sound, so that I can completely immerse myself in a world with only myself. In this world, all troubles will disappear.	While it's understandable to want to escape from the stresses of the outside world, it's important to remember that ultimately, running away from your problems will not solve them in the long term. Instead, it might be helpful to find healthy ways to cope with stress and to face your problems head-on. This could be through practicing mindfulness, seeking support from loved ones or a therapist, jo…
I often feel alone and helpless, feel that I am not understood or supported by anyone, even when there are people around me, I feel separated and alienated, this emotion makes me very depressed and negative, and sometimes leads to anxiety and depressive symptoms	I'm sorry to hear that you are going through this. It sounds like you are experiencing feelings of isolation and disconnection from others, which can be very challenging. However, know that you are not alone in feeling this way. Many people experience similar feelings at various points in their lives. It can be helpful to find ways to connect with others and build meaningful relationships. Some t…
One word from you can break my heart	I'm sorry to hear that. I'll do my best to be considerate with my words and actions.
I am extremely dissatisfied with how I look and fit, often experiencing low self-esteem and anxiety	I'm sorry to hear that you're struggling with these emotions. It can be difficult to deal with low self-esteem and anxiety, especially when it's related to one's appearance. Have you considered talking to a therapist or counselor about your feelings? They may be able to offer you some valuable insight and help you develop coping strategies that will improve your self-esteem and reduce your stress…
I really don't know what I'm doing, I don't have a clue when I do anything, it's frustrating	It's completely normal to feel that way at times. Learning something new can be intimidating and overwhelming. The important thing is to keep a positive attitude and take one step at a time. If you're feeling lost or confused, don't hesitate to ask for help or guidance from someone who has experience in the area you're struggling with. Remember that mistakes are a natural part of the learning pro…
I have a lot of social fear, I dare not communicate with strangers, and I don’t like to appear in crowded places, I hope I can overcome these fears	It is understandable to feel social fear and anxiety. However, it is possible to overcome these fears with time and practice. Here are some tips to help you: 1. Identify the root cause of your fears: Try to understand why you feel this way. Is it because of a past experience or a certain belief? Understanding the root cause can help you address your fears better. 2. Start with small steps: Begin …
Psychologists believe that extreme depression may affect a person's physical and mental health	Yes, that is correct. Extreme depression can have serious negative effects on a person's physical and mental health. It can lead to fatigue, trouble sleeping or falling asleep, changes in appetite, decreased energy and motivation, difficulty concentrating, feelings of hopelessness and worthlessness, and even suicidal thoughts or behaviors. It is important for people experiencing symptoms of depre…
Whenever I start pursuing a goal, I feel powerless, and whenever I try to change something, I feel like I don’t have the courage	It's understandable to feel powerless and lacking in courage when it comes to pursuing goals and making changes in your life. Here are a few tips to help you build up the confidence and motivation you need: 1. Start small: Break down your goals into manageable steps so that you can build momentum and feel a sense of accomplishment early on. 2. Practice self-compassion: Instead of beating yourself…
I often suffer from insomnia and difficulty concentrating on work because I am worried that I will not be able to do the job I am doing	I understand how you feel and it's important that you address these issues in order to improve your quality of life and work. Here are a few tips that may help: 1. Prioritize your tasks and focus on one task at a time. This can help you feel more in control and reduce stress. 2. Practice relaxation techniques such as deep breathing, meditation, or yoga to relieve stress and calm your mind before …
I feel more pain than ever when my family rejects my help	I'm sorry to hear that. It can be very difficult and hurtful when the people you care about reject your help. It's important to remember that their rejection of your help may not be a reflection of your worth or abilities, but rather a reflection of their own struggles or fears. You might try having an open and honest conversation with your family about how their rejection of your help makes you …
I feel depressed every time I encounter difficulties	I'm sorry to hear that. It's normal to feel upset when facing difficulties. However, it's important to remember that everyone faces challenges in life, and it's how we respond to them that makes all the difference. Here are some tips that may help: 1. Take deep breaths and try to calm yourself down. This can help you think more clearly and make better decisions. 2. Break down the problem into sma…
I often feel depressed and helpless, feel that my life lacks meaning and value, and sometimes think about suicide, but I am afraid to tell anyone, fearing that they will think I am a weak person and a failure.	I am sorry to hear that you are feeling this way. It takes a lot of courage to admit these thoughts and feelings. It's important to understand that seeking help and support is a sign of strength, not weakness. I highly encourage you to speak with a mental health professional, who can provide you with the tools and resources to manage your depression and suicidal thoughts. You can also consider co…
I have a friend who always feels like he's not good enough, smart enough, talented enough, or even worth caring about, which makes me worry about his mental health.	It's hard to see a friend struggling with their self-esteem. As a supportive friend, you can consider some of the following: 1. Listen to your friend carefully, express your care and concern without judgment. 2. Help your friend focus on their positive qualities and accomplishments by talking about their strengths, skills, and talents. 3. Encourage your friend to seek professional help if they ar…
I often feel depressed and hopeless because of work pressure and family disputes. How can I relieve this emotion and maintain my mental health?	I'm sorry to hear that you're feeling depressed and hopeless. It's important to take care of your mental health. Here are some suggestions that may help: 1. Talk to someone: Speak to a trusted friend or family member about how you're feeling. Alternatively, you can seek professional help by consulting with a therapist. 2. Exercise: Exercise can help to boost your mood and relieve stress. You can …
Lately, my mind has started to get muddled and I've started worrying about my mental health and it's scaring me	I'm sorry to hear that you are feeling worried about your mental health. It's important to acknowledge your concerns and to seek support. You can start by speaking to someone trusted, like a family member, friend, or healthcare professional. They can provide guidance and help you find resources and support that are available to you. In addition, practicing self-care techniques, such as exercise, …
I dare not face others, I always feel that I am not good enough, I am nervous, even if my friends talk to me, I will keep worrying about what they are thinking	It sounds like you may be experiencing some social anxiety. It's important to remember that everyone has moments where they feel nervous or insecure, but it doesn't define who they are as a person. Here are some tips that may help: 1. Practice self-compassion. Be kind to yourself and remember that it's okay to make mistakes or feel anxious. 2. Challenge negative thoughts. When you start to worry …
I worry about not being able to maintain my mental health and letting my family down	It's understandable to worry about maintaining your mental health and not letting down your family. It's important to prioritize self-care and seek support when needed. Some ways to maintain your mental health might include incorporating healthy habits into your routine such as regular exercise, good nutrition, and enough sleep. It's also important to limit stress and take breaks when needed. It …
I often feel alone and helpless, even when I am surrounded by people, I feel that no one understands my inner world	I'm sorry to hear that you are feeling that way. It can be difficult to feel alone and misunderstood. But please remember that you are not alone, and there are people who care about you and want to support you. Have you considered speaking with a therapist or counselor about your feelings? They can be a great source of support and guidance. Additionally, you might find it helpful to connect with …
I feel very confused about the future, I don't know what to do, this confusion makes me feel very anxious and uneasy	I understand that feeling confused about the future can be overwhelming and stressful. It's normal to feel unsure about what steps to take next. One approach that can be helpful is to break down your thinking into smaller steps. Start by identifying your goals and what you hope to achieve in the future. Then, consider what steps you can take that will move you towards those goals. It's also impor…
I went to a party today, but I was laughed at by everyone and rejected by others. I was really about to collapse	I'm sorry to hear that you had a tough time at the party. Rejection and negative comments from others can be really difficult to deal with. But please remember that their negative reactions do not define your worth or who you are as a person. Take some time to process your feelings and try to identify the thoughts that are causing you to feel so upset. If you find that you are having trouble deal…
I find my relationships to be difficult and it's always difficult to form deep connections with people. I felt like I didn't know how to get along with people or how to communicate, so I was easily isolated. I long to have some real friends, but don't know how to make them.	I'm sorry to hear that you're struggling with forming deep connections with people. It's important to remember that building relationships takes time and effort, and that it's okay to take things slow. Here are a few tips that may help: 1. Find common interests: Look for social groups or clubs in your area that share your interests. This can be a great way to meet new people and form friendships.…
My work is under a lot of pressure, I have to work overtime every day, and I often stay up late. I feel that my body and mind have reached their limits, but I still can't stop. What should I do to avoid a breakdown.	It sounds like you are experiencing burnout, which can have negative effects on your physical and mental health if not addressed. Here are some things you can do: 1. Prioritize self-care. Make sure you are getting enough sleep, eating healthy, and taking breaks throughout the day. 2. Set boundaries. Learn to say no when you are asked to take on more work that is beyond your capacity. 3. Communica…
I feel that I can't control my emotions, and I often lose my temper because of small things, which makes people around me uncomfortable	I'm sorry to hear that you're struggling with controlling your emotions. It takes a lot of self-awareness and practice to be able to manage your emotions effectively. Here are some tips that might help: 1. Identify triggers: Start recognizing what events or circumstances trigger your anger. Once you are aware of your triggers, you can start thinking about how you can avoid or manage them. 2. Take…
There was no love in my family, no warm words, no real sense of security, only blame and pressure on me, so I became more introverted and didn't want to deal with anyone.	I'm sorry to hear that. It sounds like you've been through a lot. It's normal to feel hurt and withdrawn in those circumstances. But it's important to know that it's not your fault. Nobody deserves to grow up in an environment where they don't feel loved or safe. One thing you could try is finding a support system outside of your family. This could be through friends, support groups, or therapy. …
I'm worried about my future, I don't know if I'll be successful, if I'll be able to realize my dreams	It's natural to feel worried about your future and whether you will be able to achieve your dreams, but it's important to remember that success looks different for everyone and there is no set path to achieve it. Here are some tips that may help: 1. Set goals: Write down your short-term and long-term goals. Break them down into smaller, more manageable steps and work towards achieving them. 2. Ta…
I felt like I couldn't handle the stress and challenges in my life, and I often suffered from low mood, anxiety and insomnia.	I'm sorry to hear that. It sounds like you've been experiencing a lot of difficult emotions and struggles. Have you tried any strategies to help manage these feelings? There are several options that may be helpful, such as seeking support from friends or family, practicing relaxation techniques like meditation or deep breathing, making time for self-care activities, seeking counseling or therapy,…
I feel lonely and I have a lot of people around me but I don't always feel like I can really connect with them. Is this a relationship disorder?	Feeling lonely despite having people around you can be a sign of a relationship difficulty, but it doesn't necessarily mean you have a relationship disorder. It could mean that you're not feeling emotionally or socially connected to the people around you, or that you are lacking supportive relationships with people you can confide in. It's essential to understand why you're feeling lonely and exp…
I feel very uneasy about the future, don't know what to do with me, and don't know what the future holds	Feeling uneasy about the future and unsure about what to do can be really overwhelming and stressful. However, it's important to know that you are not alone in feeling this way. Many people experience similar feelings, especially when facing uncertainty. Here are some suggestions for managing these feelings and taking steps towards creating a more positive future: 1. Focus on the present moment: …
I have a lot of problems in my relationship and I feel depressed and helpless and don't know what to do	I'm sorry to hear that you're going through a difficult time in your relationship. It's important to remember that you're not alone and there's always help and support available to you. One of the first steps to take is to acknowledge your feelings and seek professional help if needed. You can talk to a therapist or a counselor who can help you work through your emotions and develop strategies to…
I often feel very tired, physically and mentally weak, and sometimes even have suicidal thoughts, feeling that my life is meaningless	I'm sorry to hear that you're feeling that way. It sounds like you may be experiencing symptoms of depression. It's important that you seek professional help to get a proper diagnosis and treatment plan. There are many resources available such as talking to a therapist, medication, and support groups. In the meantime, be sure to practice self-care, get enough rest, exercise, and eat a healthy die…
Sometimes I suddenly experience extreme fear and panic, and it is difficult to control my emotions and behavior, and this state lasts for a long time.	It sounds like you may be experiencing panic attacks or anxiety attacks. It can sometimes feel overwhelming and scary, but there are things you can do to help manage these feelings. First, try to take slow, deep breaths to help calm your body. You can also try progressive muscle relaxation, which involves tensing and then relaxing different muscle groups in your body. It may also be helpful to ta…
Whenever I face a new challenge, I feel so nervous and insecure that I feel like I can’t handle it	It's perfectly normal to feel nervous and insecure when facing a new challenge. However, these feelings shouldn't hold you back from trying and confronting the challenge. Here are some tips that may help you overcome your nerves and insecurities: 1. Break the challenge down into smaller, more manageable steps. 2. Identify the skills or resources you need to succeed and work on developing them. 3.…
I sometimes suddenly feel that I no longer have any hobbies, have no interest in anything, and feel that I have lost direction and motivation	Feeling like you have lost your hobbies, interests, and motivation can be a common experience. It's important to know that it's normal to go through phases like this, and it doesn't mean that you're alone or that there's something wrong with you. Here are some tips that may help: 1. Focus on self-care: It's important to take care of your physical and emotional well-being. Try to get enough sleep,…
Occasionally, an uncontrollable emotion will come to my heart, I think what should I do if I have depression	If you are experiencing uncontrollable emotions that are affecting your daily life and functioning, it may be a good idea to seek professional help. Depression is a medical condition and can be treated through therapy, medication, lifestyle changes or a combination of these. It is important that you talk to a mental health professional who can assess your symptoms and provide you with the best tr…
I have always felt that my body is very uncomfortable, and I have all kinds of strange symptoms, but the doctors say that I am in good health, which makes me feel very anxious and helpless.	I'm sorry to hear that you're feeling uncomfortable and anxious about your symptoms despite being told by doctors that you're in good health. It's important to acknowledge that even if you have been given a clean bill of health, it can still be frustrating and concerning to experience ongoing symptoms. Here are a few suggestions that might help you cope with these feelings: 1. Keep a symptom jour…
Due to being in a tense environment for a long time, John often suffers from insomnia, can't tell the difference between morning and evening, and completely loses his rhythm	I'm sorry to hear that Huang Xiaoming is experiencing such difficulties. Insomnia is a common issue that affects many people, especially when they are under stress or experiencing anxiety. There are several things that Huang Xiaoming can try to help with his insomnia: 1. Establish a sleep routine: Huang Xiaoming can set a schedule and stick to it as much as possible. This includes going to bed at…
My relationship with my friends has never been great, I feel like I have a hard time making real friends and it makes me feel very alone	I'm sorry to hear that. Making friends can be difficult, but it is possible. Have you tried joining clubs or groups that align with your interests? This can be a great way to meet people who share your hobbies and passions. You could also try volunteering or attending events in your community. It may take some effort and stepping out of your comfort zone, but it's worth a try. Another thing you c…
People around me always think that I am too nervous and worry about small things, how can I relax myself?	There are many techniques that can help you relax and ease your worries. Here are a few: 1. Deep Breathing: Close your eyes, take a deep breath and slowly exhale. Repeat this several times, each time taking a deeper, slower breath. 2. Meditation: Try to find a quiet place, sit down, and focus on your breathing. Allow your thoughts to come and go without judgment or attachment. 3. Exercise: Engage…
My insomnia is forcing me to see a psychiatrist every night	I'm sorry to hear that you are struggling with insomnia. It can be a difficult experience. It may be helpful for you to speak with a medical professional to discuss potential treatment options for your insomnia. This may include therapy, medication, or lifestyle changes. Additionally, practicing good sleep hygiene such as having a consistent sleep schedule, avoiding caffeine and electronics befor…
I feel that I am not able to face the pressure of family and society, and I cannot accomplish many things	I understand how you feel. It is common to feel overwhelmed by the expectations of our family and society. However, it is important to remember that these expectations do not define our worth and potential. It is okay to take a step back and reassess our priorities and goals. Setting realistic goals and taking small steps towards them can help build confidence and motivation. It is also important…
I feel like my relationships are getting worse, neither family nor friends trust me or support me anymore, it makes me feel so lost and hopeless.	I'm sorry to hear that you're going through a tough time with your relationships. It's important to remember that you are not alone in this, and there are things you can do to improve the situation. Here are some tips that may be helpful: 1. Communication - Try to have an open and honest conversation with the people you're having problems with. Share how you feel and listen to their perspective. …
I often feel unable to control my emotions and behavior and often act impulsively or violently.	It takes courage to acknowledge and express your feelings. It sounds like you may benefit from seeking professional help from a therapist or mental health professional. They can help you identify the root causes of your impulsive or violent behavior and develop coping strategies to better manage your emotions. In the meantime, you may also find it helpful to practice relaxation techniques, such a…
I often fear being rejected by others, so I rarely speak up about my thoughts.	It's understandable to feel fear of rejection, but it's important not to let it hold you back from expressing yourself. Here are some tips that may help: 1. Practice self-compassion: Remind yourself that it’s okay to have fears and insecurities. Treat yourself with kindness and respect, and acknowledge that you deserve to be heard. 2. Start small: Begin by expressing your thoughts and opinions to…
Depression begins to develop slowly during teenage years	Yes, that's true. Depression can start slowly during adolescence and become persistent over time. It's important to recognize the signs and symptoms of depression and seek help from a mental health professional if you or someone you know is experiencing them. Some common signs of depression in teens include feelings of sadness or hopelessness, changes in appetite or sleep patterns, loss of intere…
I feel dissatisfied with my appearance and body, feel less than perfect, and often feel anxious and insecure	I'm sorry to hear that you're feeling this way. It's important to remember that everyone has insecurities and it's okay to feel that way. However, it's important to take care of your mental and physical health. Here are some tips that may help: 1. Practice self-care: Take time each day to do something that you enjoy and that makes you feel good. This could be taking a bath, reading a book, going …
I'm always worried that what I do isn't good enough, even if others have praised me, I can't let go of the worries in my heart.	It's completely normal to have self-doubt and worries about whether you're doing a good job. However, it's important to remember that you can't be perfect all the time. You're only human, after all. Here are a few tips that may help you to overcome your self-doubt: 1. Focus on the positives: Instead of dwelling on what you could have done better, try to recognize what you did well and give yourse…
I found it increasingly difficult to concentrate, whether it was reading or doing things, I would be easily distracted	It sounds like you may be experiencing symptoms of poor concentration or attention deficit. This could be caused by a variety of factors, including stress, lack of sleep, poor nutrition, or certain medications. It may also be a sign of an underlying medical condition like anxiety, depression, or ADHD. To help improve your concentration, it's important to identify and address any factors that may …
I always feel that I have no value, I don't know what the meaning of my existence is, and I feel empty and helpless every day.	I'm sorry to hear that you're feeling this way. It's common for people to feel lost or unsure of their purpose at times, but it's important to remember that everyone has value and a purpose in life. If you're struggling to find meaning and fulfillment, here are a few things you can try: 1. Explore your interests and passions. What do you enjoy doing? What makes you happy? Consider pursuing activi…
I was terrified of interacting with people, afraid of being rejected, ridiculed, or misunderstood, and I often felt alone and helpless.	I'm sorry to hear that. It's completely understandable to feel that way, and you're not alone. Many people struggle with social anxiety and feeling isolated. Remember that everyone has insecurities, and it's okay to take small steps to overcome them. Here are a few suggestions that may help: 1. Practice self-care: Take care of yourself physically and mentally. This can include things like getting…
I was very dissatisfied with my appearance and figure, and felt ugly and unattractive. I often thought about having plastic surgery and losing weight, but I was also worried about the risks of surgery, and was afraid of being ridiculed and rejected by others.	It's completely understandable to feel self-conscious about your appearance and figure, but it's important to remember that your worth and value as a person are not determined by your looks. It's also important to weigh the risks and benefits of any potential actions you may take to improve your appearance, including plastic surgery and weight loss. If you do decide to pursue plastic surgery or w…
I often stay up late and work overtime for work, which makes my physical condition worse and worse, but I can't stop, because I feel that only in this way can I prove my worth and ability	I understand how you feel, but it's important to take care of your health as well. Working consistently and taking good care of yourself will ultimately help you to be more productive and efficient in the long run. Here are some tips to help you balance work and health: 1. Set realistic expectations for yourself and communicate them with your employer if necessary. It's better to have a work-life…
I feel myself becoming more and more addicted to games and social media, as if these things have become an integral part of my life, this dependence makes me feel unable to extricate myself and lose myself, I hope to find a way to get rid of this dependence Methods.	It's great that you recognize your dependence on games and social media and want to find a way to break free from it. Here are some tips that may help you: 1. Set goals: Think about what you want to achieve in your life and set specific, achievable goals. This will help you focus your time and energy on things that are meaningful and fulfilling. 2. Schedule your time: Create a schedule for your d…
It bothered me that my mood was always up and down, sometimes I was very happy, and other times I was so depressed that I even wanted to kill myself.	I'm sorry to hear that you're experiencing fluctuating moods and depression. It's important to know that you're not alone and there is help available for you. It's important to reach out to loved ones and a healthcare professional who can help assess your symptoms and provide you with the appropriate treatment options. Options may include therapy, medication, or a combination of both. Taking care…
Sometimes I feel like no one cares about me and I'm the only one I can really count on	I'm sorry to hear that you feel that way. It can be really tough to feel like you're alone and that nobody cares about you. You may want to try reaching out to someone close to you, like a friend or family member, and talking to them about how you're feeling. It's important to remember that there are people who care about you, even if it might not always feel that way. And it's okay to take care …
Recently, I often suffer from insomnia and always toss and turn in bed at night. Could this be an underlying psychological problem?	Yes, insomnia can sometimes be caused by underlying psychological problems such as anxiety, depression, stress, and other mental health issues. If you are experiencing persistent trouble falling or staying asleep, it's important to speak to a healthcare professional or mental health specialist to discuss any potential underlying issues and develop a treatment plan that suits your needs. They may …
My relationship with my family has never been good, I feel like they don't understand me, don't respect me, it makes me feel lonely	I'm sorry to hear that you're going through this. It sounds like a very difficult situation. Is there anything specific that has led to this feeling of not being understood or respected by your family? Sometimes, communication can be a big factor when it comes to misunderstandings. It might be helpful to have an open and honest conversation with your family members about how you feel and what you…
I often feel empty and lonely inside, looking for something to fill the void, but often can't find the right way to relieve the feeling	I'm sorry to hear that you are experiencing feelings of emptiness and loneliness. It's important to remember that everyone experiences these feelings at certain points in their lives. However, if you're persistently feeling this way, it's essential to identify the root cause of these emotions. Here are some possible ways you can relieve your feelings of emptiness and loneliness: 1. Connect with O…
