# Supplementary material
Source: ML conference proceedings conference paper supplement (https://openreview.net/forum?id=JL42j1BL5h)
Supplement: supplementary_material [file Mental_Health_gpt.xlsx]

## Sheet: Sheet1
Input	Output
私はしばしば孤独で無力感を感じ、誰も私を理解してくれず、何の価値も意味もなく、自分が敗者のようにさえ感じます。この感情は私を非常に落ち込ませ、絶望的にさせ、それらを取り除く方法がわかりません。	私はそのような気持ちが辛いことを理解します。このような感情には、さまざまな要因が関与している可能性がありますが、いくつかのアドバイスをお伝えします。 1. 応援してくれる人々と話す: 孤独感や無力感は、他人とのつながりが欠けていることが原因として挙げられることがあります。親しい友人や家族など、信頼できる人々と話すことは、気分を落ち着かせるのに役立ちます。彼らはあなたを理解して励ましてくれるでしょう。 2. 少しずつ目標を設定する: 自分が無力であると感じることが多い場合、小さな目標を立てて一歩ずつ進んでみましょう。例えば、新しい趣味を始めたり、新しいスキルを学んでみたりすることができます。自分が成し遂げたことによって、自信や喜びを得ることができるでしょう。 3. 自分自身を大切にする: 自己肯定感を高めることも重要です。自分が無価値だと感じることはありません。自分自身の強みや良いところを…
たとえポテトチップスを一袋買うだけだとしても、過食な自己嫌悪な行為だと思われるのではないかと心配です	心配な気持ちもわかりますが、ポテトチップスを一袋買うだけで過食と思われることは多くないと思います。過食は一度に大量の食べ物を摂取する行為であり、一袋のポテトチップスを食べることは過食とは言えません。 ただし、過食傾向がある場合や、一袋のポテトチップスを食べた後に自己嫌悪感を感じるなら、心の健康を考えるためにも適度な食事のバランスを心がけることが大切です。バラエティ豊かな食材を摂り、自分の体の満足感や栄養バランスに気を付けることが大切です。また、過食や自己嫌悪感について悩む場合は、専門家に相談することをおすすめします。
私はいつも疲労感と無力感を感じていて、自分の仕事に集中できず、興味のあることに取り組むことさえできず、とても落ち込んでいました。	それは辛い状況ですね。疲労感や無力感を感じることは、さまざまな要因によるものです。まずは、身体的な健康状態を確認してみることをおすすめします。十分な睡眠をとっているか、バランスの取れた食事を摂取しているか、適切な運動をしているかを見直してみてください。 また、心の健康も重要です。ストレスや不安が疲労感を引き起こしている場合もあります。日常生活でのストレスの原因を見つけ、それを軽減できる方法を探すことが大切です。例えば、リラクゼーションや瞑想の練習、趣味に時間を割くなど、自分自身を癒す時間を持つことが助けになるかもしれません。 また、専門家のサポートを受けることも考慮してください。心理療法士やカウンセラーは、あなたの状況を理解し、適切なサポートを提供してくれるでしょう。 最後に、自分に対して優しくなることを心がけてください。自分の限界を認め、無理をしないようにすることも大切です。自分の心と…
最近、よく眠れなかったり、眠りにつくと悪夢を見たり、朝起きると体が疲れていてだるいです。	十分な睡眠をとることは重要です。以下の方法を試してみて、より良い睡眠の質を得ることができるかもしれません。 1. 睡眠環境を整える: 静かで暗く、快適な温度の部屋で寝るようにしましょう。遮光カーテンや耳栓、扇風機などの使用も考慮してください。 2. リラックスの習慣を作る: 寝る前にリラックスするために、お風呂に入る、ストレッチをする、お気に入りの本を読むなどの習慣を作ってみてください。 3. スクリーンタイムを制限する: 寝る前の1〜2時間はスクリーンから目を離しましょう。スクリーンのブルーライトは眠りを妨げることがありますので、本を読んだり、リラックスする時間を作りましょう。 4. 規則正しい生活リズムを作る: 毎日同じ時間に寝ることと起きることを心がけましょう。体内時計を整えることで、より良い睡眠をとることができます。 5. 身体活動を取り入れる: 適度な運動をすることで、体を疲れ…
医者に行くたびに症状は改善せず、気分はさらに悪くなり、自己憐憫と自己憐憫に陥ることがよくあります。	医者に行っても症状が改善しない場合、他の専門家の意見を求めることも考慮してみてはいかがでしょうか？別の医師や専門家のアドバイスや治療法を試してみることで、症状の改善が見込めるかもしれません。また、自己憐憫に陥りがちな場合、専門家のサポートや心理療法を受けることもおすすめです。自己憐憫に陥らずに、健康に向けて前向きなアプローチを持つことが大切です。あなたが抱える症状や問題について、専門家の意見を求めることをおすすめします。
たとえ群衆の中でも、私は常に孤立され、疎外されていると感じていました。	それは辛い経験ですね。孤立や疎外感は誰にでも起こりうることですが、それに対処する方法もあります。まずは自己肯定感を高めることが重要です。自己価値を認め、自分自身を受け入れることで、他人からの評価に左右されずに自信を持つことができます。 また、自分に合った趣味や活動を見つけることも役立つでしょう。共通の興味や関心を持つグループに参加することで、自然と人とのつながりを作ることができます。 人間関係を築く上で、自分自身を開放し、他人とのコミュニケーションを積極的に取ることも重要です。他人に興味を持ち、優しさや思いやりを示すことで、人々とのつながりを深めることができます。 しかし、それでもなお孤立感が続く場合は、専門家のサポートを受けることをおすすめします。カウンセラーや心理学者に相談し、状況を改善するための具体的なアドバイスをもらうことができるでしょう。
ゲームに依存しないと、インターネットは目に見えない心理的プレッシャーになります	ゲームに依存することなくインターネットを利用する方法を見つけることは、心理的なプレッシャーを軽減するために重要です。以下はいくつかの提案です。 1.時間管理: インターネットの利用時間を制限し、ゲームに費やす時間とバランスを取るようにしましょう。時間を意識的に管理することで、他の活動にも充分な時間を割くことができます。 2.目標設定: インターネットを使う目的を明確にしましょう。仕事や学習に集中したいのか、情報収集やコミュニケーションが目的なのかを決めておくことで、ゲームなどの誘惑から逃れることができます。 3.リラックス法: インターネットを利用する際には、リラックス法を取り入れましょう。深呼吸や瞑想、ストレッチングなどを行うことで、ストレスや心理的なプレッシャーを軽減することができます。 4.対話や交流: インターネット上で他の人と対話したり、交流することも心理的なプレッシャーを軽減…
最近プレッシャーがかかりすぎて、毎日とても不安で、よく眠れず、頭が痛くて、心臓の鼓動が早くて、いつでも倒れてしまいそうです。	お気持ちお察しします。プレッシャーやストレスが長期間続くと、身体や心に悪影響を及ぼすことがあります。まずは、身体の健康を守るために以下のことを試してみてください。 1. ゆっくりと深呼吸をする：数分間、目を閉じてゆっくり深呼吸をすることで、リラックス効果が得られることがあります。 2. 日々の運動：適度な運動はストレスを軽減させる効果があります。ウォーキングやヨガ、ストレッチなど、自分に合った運動を取り入れましょう。 3. 睡眠環境の改善：就寝前にリラックスできる環境を整えることが重要です。静かな部屋や快適な寝具、寝室の温度や照明を整えることをお勧めします。 4. 健康的な食事：バランスの取れた食事を心がけましょう。栄養豊富な食品や水分を摂取することで、身体のバランスを整えることができます。 5. リラックス法の試み：瞑想やヨガ、アロマテラピー、マッサージなど、自分に合ったリラックス法を…
困難や挫折に遭遇するたびに、いつも自信ややる気を失い、自分には耐えられないと感じてしまう	困難や挫折に遭遇すると自信ややる気が失われ、自分には耐えられないと感じてしまうことは人間なら誰しも経験することです。しかし、遭遇した困難や挫折は成長の機会でもあります。以下にいくつかのアドバイスを提供しますので、参考にしてみてください。 1. 一歩ずつ前進することを意識する：困難や挫折に直面した時、一度に全てを解決することは難しいことです。一歩ずつ前進し、小さな目標を達成することで自信を取り戻しましょう。 2. 適切なサポートを求める：困難や挫折は一人で抱え込まず、適切なサポートを求めることが重要です。信頼できる友人や家族、専門家など、自分と共感してくれる人に話を聞いてもらうことで新たな視点や解決策が見えてくるかもしれません。 3. 自分自身を許す：困難や挫折は誰にでも起こるものであり、完璧な人間は存在しません。自分自身を責めず、過ちを許すことが大切です。その上で、反省し学びを得ることで…
自分のやっていることは十分ではないのではないかといつも不安で、常に他人から評価されているように感じて憂鬱です。	不安や自己評価の悩みは、多くの人が経験する感情です。まずは、自己評価に対して現実的に見直すことが大切です。 1. 自己評価の基準を客観的に考える：自分に厳しく評価する傾向がある場合、客観的に自分の成果や努力を振り返ってみましょう。自分がどれだけ頑張っているか、成果を出しているかを客観的に見つめることで、自己評価が変わるかもしれません。 2. 自己効力感を高める：自分ができることや良いところに焦点を当てることで、自己効力感を高めることができます。自分の成功体験や達成感のある経験を思い出すことで、自信を取り戻すことができるでしょう。 3. 自己成長を重視する：過去の自分と比較しないで、自己成長に注力してみましょう。他人と比較することは、自分を貶める原因になります。代わりに、今の自分と前よりも成長したかどうかを考えることで、自己評価が改善されるかもしれません。 また、心の健康には適度な休息やリ…
私は自分がすべて正しくやっているかどうかを常に心配し、他の人が私をどう思うか、批判するかを恐れていました。その結果、痛みを伴う自己不信に陥ることがよくありました。	自己不信や他人の意見への過敏さは、多くの人が抱える共通の感情です。以下にいくつかのアドバイスを提供することができます。 1. 自己肯定感を高める: 自分自身を否定するのではなく、自分の強みや成果を認識し、自己肯定感を高めることを意識しましょう。毎日、自分の成功や良い面にフォーカスし、自分を誇りに思うことが大切です。 2. 批判的な声を払拭する: 他人の批判や否定的な意見に過敏に反応するのではなく、建設的なフィードバックを受け取る態度を持ちましょう。他人からの意見を受け入れることで、自己成長や改善ができる機会に変えることができます。 3. 自己受容の練習: 完璧である必要はありません。自分自身を完全に受け入れることを学びましょう。失敗や間違いは成長の機会であり、自己発展の一部です。過去の過ちやミスは、過去の自分と対話し、成長するための貴重な教訓として見ることができます。 4. 自分の幸福を…
自分の思いを胸に秘めて いつも爆発しそうな気がして 他人の目から隠れられない	あなたの気持ちを抱えていることで、いつも自分が爆発しそうな気持ちになるのですね。そして、他人の目から隠れることができないと感じているのですね。 思いを胸に秘めていることは、時には辛くなることもあるかもしれません。しかし、それは真摯な気持ちを持っている証でもあります。他人の目から隠れることができないと感じるのは、他人に理解されることを求めているのかもしれませんね。 どんな思いを抱えているのか、他人と共有することで、気持ちを軽くすることもできるかもしれません。信頼できる友人や家族に相談してみることも一つの方法です。また、自分自身を理解し、自己受容することも大切です。自分の気持ちに素直になり、真剣に向き合ってみましょう。 私はあなたの気持ちをサポートすることしかできませんが、いつでも話を聞いて共感し、支えになります。一緒に乗り越えていきましょう。
私の家族は突然の事故に見舞われ、両親も重傷を負ったため、私は無力感と憂鬱を感じ、うつ病の症状まで発症しました。	ご家族の事故について、私は非常に心を痛めます。無力感や憂鬱な気持ち、そしてうつ病の症状が出ているとのことで、本当につらい状況かと思います。 まずは、自分の気持ちを大事にすることが重要です。自分自身の感情に対して優しく接し、自分の感じ方を受け入れることが必要です。また、周りの人に感情を共有したり、相談できる人がいれば、話をしましょう。時には気持ちを吐き出すことが、心の負担を減らす一歩になります。 さらに、専門家のサポートも受けることをおすすめします。うつ病は病気であり、適切な治療が必要です。心療内科やカウンセラーに相談し、適切な治療法やケア方法を見つけることが重要です。専門家はあなたのサポートをするために存在していますので、迷わず助けを求めてください。 また、自己ケアも大切です。良質な睡眠やバランスの取れた食事、適度な運動を心掛けましょう。また、リラックスする時間や趣味に時間を割くことも、…
私は、人付き合いがますます苦手になり、いつも一人でいることを好み、社交や他人と人生を共有することに興味がなくなり、この孤独感が私をとても憂鬱にさせました。	孤独感や人付き合いに苦手意識を持つことは、人によってさまざまな理由があるかもしれません。まず大切なことは、ご自身の感じ方や意向を受け入れることです。一人で過ごすことや社交を避けることが、あなたにとって心地よい方法であれば、それは十分に尊重されるべきです。 ただし、孤独感が非常に憂鬱を引き起こしている場合には、改善策を考えてみることも有益かもしれません。例えば、興味を持つ趣味や活動に参加することで、同じような趣味を持つ人たちと出会えるかもしれません。また、専門家の助けを借りることも考慮してみてください。心理療法士やカウンセラーは、孤独感や社交不安の扱いに慣れており、あなたの感じていることを理解し助言をくれるかもしれません。 どんな場合でも、自分自身の感じ方を大切にすることが重要です。あなたが一人でいることを好み、社交や他人と人生を共有することに興味がないということが、あなたの個性の一部であ…
支配欲が強く、常に自分の手ですべてをコントロールしたいと考えており、他人の干渉や干渉を許さず、それが原因で人間関係が破綻してしまう	支配欲が強く、自己の手で全てをコントロールしたいと思うことは、時に人間関係に困難をもたらすことがあります。他者の干渉や助けを受け入れることに抵抗を感じることで、信頼や協力関係が崩れてしまうこともあります。 しかし、人間関係の健全性を維持するためには、相手の意見や感情を尊重し、柔軟性を持つことが重要です。他者にも適切な自己決定の機会を与えることで、より持続的なつながりを築くことができます。 自分の支配欲を抑えることは一朝一夕にはできないかもしれませんが、他人との円滑な関係を保つために、以下のようなアプローチを考えることができます： 1. 自己の欲求の正当性を客観的に見つめる：すべてを自分のコントロール下に置きたいと思うのは自然な欲求ですが、他者が参加し、意見を出すことでより豊かな結果が生まれることもあります。自己の欲求と他者の意見をバランスさせ、客観的に見つめることが重要です。 2. エン…
頭の中に同時にたくさんの考えや声があり、非常に混乱して迷っているかのように、心がとても混沌としているように感じることがよくあります。	混乱や混沌とした状態になることは、私たちにとって理解しやすいものではありませんが、おそらくその状況には理由があるでしょう。 まず、こんな状態になる原因の一つにはストレスが挙げられます。日常生活の中での多忙さや負担が蓄積し、思考が乱れることがあります。また、過度の情報の取り込みや刺激の過多も、頭の中で考えが整理されずに混沌とした状態を引き起こすことがあります。 また、不安や心配、パニックなどの感情が強く作用することも、混乱を引き起こすかもしれません。心理的な状態が安定していないと、思考も安定せず混乱してしまう場合があります。 私は専門家ではありませんが、いくつかの方法を提案します。まずは、リラックスやストレス解消の方法を試してみることが大切です。瞑想や深呼吸、ヨガなどの心身のリラックス法が有効かもしれません。また、適度な運動や良質な睡眠も、頭をクリアにするのに役立つかもしれません。 さらに…
何をするにも家族から批判される理由	家族から批判される理由はさまざまですが、以下にいくつかの可能性を挙げてみます。 1. 見解や意見の相違：家族の中には、異なる見解や意見を持つ人々がいるかもしれません。あなたが意見を述べたり、行動をする際に、他の家族の考え方と異なっていると、批判されることがあります。 2. 行動や態度の問題：あなたが行動や態度に問題がある場合、家族から批判されることもあります。例えば、無責任な行動や無礼な態度、ルールや約束を守らないなどの場合です。 3. 家族の期待に応えていない：家族は、あなたに対して特定の期待や希望を抱いている場合があります。それに応えることができなかったり、達成できなかった場合、批判されることがあります。 4. コミュニケーションの問題：コミュニケーションが円滑に行われていない場合、誤解や不満が生じ、それが批判として表れることもあります。相手の意図や思いを正しく理解することができない…
最近、毎日疲れていて気力がなくなり、長時間寝てもよくなりません	お疲れさまです。毎日疲れて気力がなくなることは、多くの人にとって課題となることですね。いくつかの可能な原因と対策をご紹介しますが、専門家の助言を仰ぐことが必要である場合もありますので、ご注意ください。 1. 睡眠の質を改善する：長時間寝ても疲れが取れない場合、睡眠の質が問題となることがあります。寝る前にリラックスし、寝室を快適にするようにしましょう。寝る前のスマートフォンやコンピュータの使用を避けることもお勧めです。 2. 適切な栄養を摂る：バランスの取れた食事を心掛け、十分な栄養を摂ることが重要です。特にビタミンやミネラル、タンパク質を十分に摂取するようにしましょう。 3. ストレスを軽減する：ストレスは疲れの原因になることがあります。日常生活においてリラックスする時間を作り、ストレスを軽減する方法を見つけることが重要です。例えば、散歩をする、好きな趣味に時間を充てる、ストレッチをする…
やる気も希望もすべて失ったように感じて、人生は無意味だと感じます	そんな気持ちになってしまうことは、とても辛いですね。しかし、希望ややる気を取り戻すことも可能です。以下のアドバイスを参考にしてみてください。 1. 自分の感じ方を受け入れる：無気力な気持ちや希望を失う感情は、一時的なものと考えましょう。自分の感情を否定せずに受け入れることで、少しずつ前に進むことができます。 2. 自分自身に対する優しさ：自分を厳しく責めるのではなく、自分自身に対して優しく接しましょう。無理をせず、ゆっくりと自分のペースで回復することが大切です。 3. 支えを求める：友人や家族に困っていることを話し、支えを求めることは勇気が必要かもしれませんが、大切な一歩です。彼らはあなたをサポートしてくれるはずです。 4. 小さな目標を立てる：大きな目標を達成することは難しいかもしれませんが、小さな目標を立てることで少しずつやる気が戻ってきます。達成感を感じることが大切です。 5. ポ…
とても緊張したり、落ち込んだりすることもありますが、気分を変える方法がわかりません	気分を変える方法はさまざまありますので、いくつかのアイデアをお伝えします。 1. 音楽を聴く：リラックスするための音楽や、気分を上げる曲を聴くことは効果的です。お気に入りのアーティストやジャンルの音楽を聴きながら、心をリフレッシュする時間を過ごすと良いでしょう。 2. 散歩や運動をする：体を動かすことはストレスを解消する効果があります。散歩やジョギング、ヨガなど、自分に合った運動を取り入れてみてください。自然の中で過ごすことも、気分転換になります。 3. 趣味や好きなことに没頭する：好きなことをすることは、気分を変えるのに効果的です。趣味を楽しむ時間を作ってみてください。読書、絵を描く、料理をするなど、自分が楽しいと思うことを優先してみましょう。 4. 友人や家族と過ごす：他の人と交流することは気分を変えるのに効果的です。友人や家族と話をする、遊びに行くなど、人とのコミュニケーションを通…
思考や知覚に問題があり、奇妙な音を聞いたり、奇妙なものを見たりすることが多く、非常に恐怖を感じます	それはつらい経験ですね。思考や知覚に問題がある場合、医療専門家の診断や助言が役立つことがあります。まずは専門家に相談することをおすすめします。彼らはあなたの症状や状況を評価し、適切な支援や治療を提案してくれるでしょう。 また、恐怖を感じている時は、自分自身を守るために以下の方法を試してみることもできます: 1. 安心できる場所を見つける: 自宅や落ち着くことができる場所でリラックスして過ごしましょう。静かな環境や慣れた場所は、安心感をもたらすことがあります。 2. サポートシステムを活用する:信頼できる家族や友人と話し合うことで、心の支えを得ることができます。もし周囲の人々に理解されずに感じる場合は、専門家やサポートグループに参加することも検討してみてください。 3. ストレスを軽減する: マインドフルネスや瞑想、呼吸法など、ストレス軽減のテクニックを試してみると良いでしょう。常にリラッ…
緊張や不安を感じることが多く、自分の感情やストレスをコントロールできず、とても落ち着かず落ち着かない状態になります。	緊張や不安を感じることは、誰にでも起こることですので、まずは自分自身を責めずに落ち着いてください。以下にいくつかの方法をご紹介します。 1. 深呼吸をする: リラックスするために、深く息を吸い込み、ゆっくりと息を吐き出すことが効果的です。呼吸に意識を向け、ゆっくりと深呼吸を繰り返しましょう。 2. マインドフルネス: 現在の瞬間に集中することで、心を落ち着かせることができます。五感を使って周りの環境に意識を向け、自分の感情にも注意を払いながら、現在の状態に集中しましょう。 3. ストレス管理技術を学ぶ: ストレス管理の技術を学ぶことで、ストレスを効果的に軽減することができます。たとえば、適度な運動、瞑想、リラックス法などは有効な方法です。 4. 健康的な生活習慣を維持する: 充分な睡眠をとり、バランスの取れた食事を摂ることが大切です。また、定期的な運動やストレッチなども、心と体の健康を保…
私は孤独で無力感を感じることが多く、たとえ周りに誰かがいても虚しさを感じます。なぜこのようなことが起こっているのかわかりません。どうすれば助けを求められますか?	孤独や無力感を感じることは、誰にでも起こりうることです。まずは自分の感情を認識し、どのように感じるのかを考えることが大切です。次に、以下のような手順で助けを求めることができます： 1. 話し相手を見つける: 身近な友人や家族、信頼できる人に自分の感じていることを話してみましょう。相手が理解し、サポートしてくれる可能性があります。 2. 専門家への相談: 心理カウンセラーやセラピストに相談することを検討してください。専門家はあなたの感情や状況をより深く理解し、適切なサポートを提供することができます。 3. 自助グループに参加: 同じような経験をしている人々のサポートを受けるために、自助グループに参加してみることも良いでしょう。そこで自分の気持ちや経験を共有し、他の人々からのアドバイスや励ましを受けることができます。 4. メンタルヘルスリソースの活用: インターネット上には様々なメンタルヘ…
私は過去にトラウマを抱えており、今では恐怖と痛みとともにその経験をいつも思い出しており、この感情を克服するために助けを求める必要があります。	ごめんなさい、トラウマ体験をお持ちのようで心配ですね。トラウマは深い影響を及ぼすものですが、その感情を克服するためにはいくつかの方法があります。ただし、専門家の助けが重要ですので、まずは心理療法士やカウンセラーと相談することをお勧めします。彼らはあなたの経験について理解し、適切なサポートや治療方法を提案することができます。 また、以下のような方法も試してみることができます： - 自己ケア：健康的な生活習慣を整えることが大切です。十分な睡眠をとり、バランスの取れた食事を摂ることや、適度な運動を行うことが重要です。 - リラックス法：深呼吸、瞑想、プログレッシブ・マッスル・リラクセーションなどのリラックス法を使い、心身の緊張を解きほぐすことができます。 - サポートシステム：信頼のおける人々と話し合うことで、感情を共有することができます。家族や友人、サポートグループなどがサポートを提供してく…
過去の記憶が頭から離れず、思い出すととても辛くなり、日常生活に支障が出てしまいます。	過去の記憶が頭から離れず、それが辛くなることは理解できます。それが日常生活に支障をきたしているようであれば、以下のアドバイスが役立つかもしれません。 1. 心のケアをする：ストレスを軽減し、心の安定を促すために、リラックスや瞑想、深呼吸、ストレッチなどの習慣を取り入れましょう。このような活動は、思考を遠ざけることがあります。 2. サポートを求める：誰か信頼できる人に話を聞いてもらうことは、気持ちを軽くするのに役立ちます。友人や家族など、あなたにとって心強い存在を探しましょう。 3. 記録を残す：過去の出来事や感情を自分自身に向けて書き留めることで、頭から離れることがあります。日記を書いたり、感情を表現するためのクリエイティブな手段を試してみましょう。 4. 専門家の支援を受ける：過去のトラウマや困難な出来事に対して支障が出ている場合、専門のカウンセラーや心理療法士のサポートを受けること…
私は昔いじめられていたのですが、今ではそのことを思い出すと怖くなり、悪夢を見ることもあります。	いじめの経験は非常に辛いものであり、それが今も心に残っていることは理解できます。そのような過去の出来事が思い出されることにより、不安や恐怖を感じるのは自然なことです。 あなたが悪夢を見ることもある場合、以下のような方法を試してみることをお勧めします: 1. 心理療法: 心理療法士やカウンセラーのサポートを受けることで、いじめのトラウマから回復することができます。専門家に相談し、安心感と共に過去の出来事を処理する方法を見つけましょう。 2. 自己ケア: ストレスを軽減し、心の安定を保つために、十分な休息、バランスの取れた食事、適度な運動など、自己ケアに時間を割くことが重要です。 3. サポートシステム: 信頼できる友人や家族と話し合うことで、感情を共有し、サポートを受けることができます。あなたを理解してくれる人々の存在は、いじめの経験に対する回復を促進することができます。 4. 瞑想やリラ…
ますます孤独を感じる、友達もいない、親戚もいない、たとえ誰かがそばにいたとしても、とても空虚で居心地が悪い	孤独を感じることは辛いですね。まずは自分自身と向き合い、自分自身を大切にすることが大切です。以下にいくつかのアドバイスをいくつかご紹介します。 1. 趣味や興味を追求する: 趣味や興味を持つことは、自己成長や自己肯定感を高めることができます。自分の好きなことに時間を費やし、新たな仲間やコミュニティを見つけるチャンスです。 2. 地域のイベントやグループに参加する: 地域のイベントやグループに参加することで、新しい人々との出会いの機会が増えます。興味のある活動やボランティアに参加することで、共通の趣味や関心事を持つ人々と繋がることができます。 3. オンラインコミュニティに参加する: インターネット上には、様々な趣味や関心を持つ人々が集まるコミュニティがあります。自分に合ったコミュニティに参加し、オンラインで交流を持つこともできます。 4. 心理的なサポートを求める: 心理的なサポートが必…
常に集中できず、タスクを完了するのが難しく、疲れて憂鬱になることがよくあります	集中力を高めるためには、いくつかの方法を試してみることができます。 1. 自分に合った環境を整える：静かな場所で作業するか、集中できる音楽を聴くなど、自分にとって最適な環境を整えましょう。 2. タスクを小さく分割する：大きなタスクを小さな部分に分け、一つずつ取り組むことで、やる気を保ちながら進めることができます。 3. 適切な休憩を取る：集中力が切れてきたら、一時的に休憩を取ることも大切です。短い休憩を挟むことで、脳をリフレッシュさせることができます。 4. スケジュールを立てる：予定や目標を明確にし、スケジュールに組み込むことで、時間を有効に使えます。しかし、過密なスケジュールにならないよう、余裕を持った計画を立てましょう。 5. 適切な睡眠を確保する：睡眠不足は集中力を低下させる原因になります。毎晩充分な睡眠をとるように心がけましょう。 6. ストレスを管理する：ストレスは集中力を…
私は孤独や喪失感を感じることが多く、他人と親密な関係を築くことができず、周囲の人や物事に対する興味や熱意さえも失います。	孤独や喪失感を感じることは自然であり、誰しもが経験することです。しかし、他の人々との親密な関係を築き、興味や熱意を持つことは可能です。以下にいくつかのアドバイスをご紹介します: 1. 自分自身との対話を重視する: 自分自身の感情や思考に向き合い、自分の内面を理解することは非常に重要です。自己啓発のために本を読んだり、ジャーナルを書いたり、マインドフルネスや瞑想の練習を行ったりすることで、自分自身とのつながりを深めることができます。 2. コミュニケーションスキルの向上: 他人との関係を築くためには、コミュニケーションスキルが重要です。自分の意見や感情を適切に伝えるためのコミュニケーションスキルを学ぶことで、他人との対話をよりスムーズに進めることができます。 3. 共通の趣味や興味を見つける: 自分の興味や熱意を取り戻すために、新しい趣味や興味を見つけることも助けになります。地元のクラブや…
孤独で途方に暮れており、他の人々と親密な関係を築くことができないと感じており、非常に憂鬱で無力感を感じています	お気持ちが落ち込んでいるのはわかります。孤独を感じることや他の人々との関係の構築に苦労することは、誰にでも起こりえることです。しかし、その状況を変えるためにできることがあります。 まずは自分自身を受け入れることから始めましょう。自分の弱点や不安を受け入れることで、他の人々との関係を築く障害を減らすことができます。また、自分自身を愛し、尊重することも重要です。 次に、コミュニケーションスキルを磨くことをおすすめします。他の人々との交流を増やすために、まずは興味のある活動や趣味に参加することが有効です。そこで同じ趣味を持つ人々に出会うことができ、共通の話題でコミュニケーションを取る機会が増えます。また、積極的に他の人々と話すことや、相手に対して関心を持つことも大切です。 さらに、自己成長や自己啓発に取り組むこともおすすめです。自分自身に自信を持ち、他の人々との関係を築く上で必要なスキルや知識…
周りの人はみんな幸せなのに、自分の心は空虚で何も喜びを感じられない	そんな気持ちになってしまうことは辛いですね。人々が幸せそうに見える一方で、自分自身が喜びを感じられないと感じるのは、孤独や失望を感じることもあります。 まず、自分自身に対して優しくなってみてください。自分の感情や気持ちを無視せずに、受け入れることが大切です。その上で、自分が何を求めているのかを考えてみましょう。幸せを感じる要素は人それぞれですが、自分自身の大切な価値観や興味関心を追求することが重要です。 また、人々が幸せそうに見える一方で、実際にはそれぞれが抱えている問題や苦労もあることを忘れないでください。他人と比較せずに、自分自身の幸せに集中することが大切です。 さらに、誰かと話したり、信頼できる人に相談することも助けになるかもしれません。他人に自分の感情を共有することで、心の負担が軽くなることもあります。 最後に、心を満たすために意識的にポジティブな考えや行動を取ることもおすすめで…
私は自尊心が低く、自分は役立たずで取るに足らない存在だと感じることが多く、夢や目標を追求すること、失敗すること、他人から見下されることを恐れていました。	自尊心が低いと感じることは、多くの人が経験するものです。しかし、自分自身の価値を見出し、自信を持つことは可能です。以下は、自尊心を高めるためのいくつかのアイデアです。 1. 自分自身を受け入れる: 自分自身を否定的に捉えるのではなく、自分を受け入れることから始めましょう。自分に寛容になることで、他人の評価に左右されずに自分を評価できるようになります。 2. 成功と失敗を別々に考える: 夢や目標を追求することは、成功だけでなく失敗も含まれます。失敗は成長の機会であり、成功への道のりの一部です。自分自身を取るに足らない存在だと感じることがあっても、失敗から学ぶことができると意識してみてください。 3. 自分の強みに集中する: 自分には必ず何かしらの強みがあります。それを見つけ、それに集中することで自信をつけることができます。他人と比較せず、自分自身と向き合い、自分の強みを活かしましょう。 4…
物事に過度に敏感になってしまい、小さなことで落ち着かず心配になることがよくあります	心配性になることは、多くの人が経験することです。しかし、過度に敏感になり、小さなことで心配する場合には、いくつかの方法を試してみることができます。以下にいくつかのアドバイスを提案します。 1. 自分の感情を理解する：何が心配を引き起こしているのかを知ることは、心配の管理に役立ちます。自分がどのような状況やトリガーに対して敏感なのかを認識しましょう。 2. 持続的なリラックス法：深呼吸や瞑想、ヨガなどのリラクゼーション技術を取り入れることで、心の平穏を取り戻すことができます。日常的に行うことで、心の安定を促すことができます。 3.問題の原因を分析する：小さなことで心配するのはなぜなのか、その原因を特定することが重要です。可能な限り具体的に問題を分析し、客観的な視点を持つことで、問題を解決に導くことができるかもしれません。 4.適切なサポートを求める：心配性を克服するためには、適切なサポート…
両親は私が良い人であることを常に期待していましたが、私は両親の基準に達していないと感じ、不安で自尊心が低くなっていました。	両親の期待に応えようとするのは理解できますが、自分自身を否定する必要はありません。自尊心は内から湧き上がるものであり、他人の期待に合わせるために自己評価を下げる必要はありません。あなたはそれぞれ個々の才能や良い人であるための独自の特質を持っています。自分を受け入れることから始め、自分の価値を見出すことが大切です。また、自己成長や自己啓発をすることで、より良い自分になるための努力をすることもできます。両親とのコミュニケーションを通じて、あなたの感じている不安や自尊心の低さについて話し合うことも有益かもしれません。しかし、他人の期待だけに囚われず、あなた自身が自分自身を認めることが大切です。
出口のない迷路に迷い込んだみたいに毎日何度も夢をみる	夢の内容や感情は人によって異なるので、一般的なアドバイスをお伝えしますね。 まずは、夢を鮮明に覚えておくことが大切です。夢をメモする習慣をつけてみてください。それによって、夢の要素やパターンを見つけやすくなるかもしれません。 迷路は、自己の心の迷いや迷走、未知の道を探索するというシンボルとして解釈することが一般的です。迷路の中で迷っている夢をみることは、現実世界での迷いや困難を反映しているかもしれません。 出口のない迷路に迷い込むことは、目標や抱えている問題に対して解決策や方向性が見えず、行き詰まりを感じていることを意味するかもしれません。このような夢を繰り返し見る場合、日常生活での迷いや困難に対して向き合う必要があるかもしれません。 以下は、夢を活用して問題解決や成長に取り組むための提案です。 1. 夢を分析する：夢の内容や感情を細かく覚えておき、それを分析してみましょう。出口のない迷…
一人でいるときはいつでも、以前に起こったことすべてを思い出して、すべてがとても惨めな気分になります	それは自分の思考パターンや心の状態によるものです。過去の出来事を振り返ることは、失敗や後悔を思い出すことによって惨めな気分になりがちです。しかし、それを変える方法もあります。 まず、過去の出来事について自分自身に優しくなりましょう。過去の失敗や後悔は誰にでも起こりうるものであり、それが今の自分を作り上げる一部です。自分を責めたり悪く感じる必要はありません。 また、過去の出来事にすべて囚われるのではなく、現在に意識を集中させることも大切です。今この瞬間に感謝すべきことや自分が得意なことに向き合うことによって、ポジティブな気持ちを持ち続けることができます。 さらに、過去の出来事から学びを見つけることも重要です。過去の経験は成長の機会であり、同じ間違いを繰り返さないための学びです。その学びを活かすことで、将来の成功や幸せにつなげることができます。 もし、この問題が日常生活や心の健康に大きな影響…
自分の体を見ると、とても醜く、とても気分が悪くなる	自分自身を醜いと感じることは、自尊心や自己評価に影響を与えることがあります。しかし、醜いと感じることは他人にとっては全く気にならない場合もあります。 まず、自己評価において外見だけではなく、他の価値や特徴にも注目することが重要です。人は誰でも個々に素晴らしい特徴を持っています。自分の能力や心の面での成長にも意識を向け、自分自身をより幸福にするためにそれらを活かしていくことができます。 また、他の人々の美しさは外見だけではなく、内面や行動からも感じることがあります。他の人々と比較することではなく、自分の個性やポジティブな特徴に集中することで、自己評価を高めることができます。 最後に、外見に関して悩むことが続く場合は、専門家やカウンセラーに助言を求めることをおすすめします。彼らはあなたをサポートし、より自己受容やポジティブな自己評価を促すための手段を見つけるお手伝いをしてくれます。
私は自閉症で、他の人とコミュニケーションをとる方法がわかりません。まったく異なる世界に孤立しており、とても惨めで無力感を感じています。	自閉症を抱えていることは、他の人とのコミュニケーションにおいて挑戦を伴うことがあるかもしれませんが、それはあなたが特別な存在であることを意味しません。まず、自分自身を受け入れることが大切です。自閉症はあなたの一部であり、あなたが抱える課題や困難はあなた自身の力を信じることで克服することが可能です。 コミュニケーションを促進する上で以下のポイントに気を付けると良いでしょう： 1. 少しでも緊張を緩和するために、リラックスした環境を作ってみてください。安心できる場所や時間帯を見つけることが重要です。 2. 会話やコミュニケーションの練習をするために、自分に合った方法を見つけてみてください。言葉や文章ではなく、絵や写真、音楽、身振り手振りなどを使っても良いです。 3. コミュニケーションのパートナーには、理解し協力的な人を選びましょう。助けてくれる友人や家族、専門家が必要な場合はサポートを受け…
私はかつて友人に裏切られ、とても傷つき、人間性や友情の信頼性を疑い始め、自分自身を閉ざし他人を疎外するようにさえなりました。	私は、友人に裏切られるという経験は非常に辛いものであり、それによって人間性や友情の信頼性に疑いを抱くのは自然なことです。しかし、そのような経験から自分自身を閉ざし、他人を疎外するのは本当に望む状態ではありません。 忘れ去ることは簡単ではありませんが、その出来事から学び、成長する機会にすることができます。まずは自分自身と向き合い、傷ついた感情を癒すことが重要です。自分自身を愛し、自尊心を育てるために、自己ケアや自己啓発に時間を割くことをお勧めします。 また、信頼関係を築くためには、他人に対して再び信頼を寄せることが重要です。過去の出来事を背景にして、新しい人々との関係を構築する際には、ゆっくりと時間をかけることが大切です。一人一人を個別の存在として受け入れ、互いを理解し合う努力をすることで、友情の信頼を再び育むことができるでしょう。 最後に、他人を信じることはリスクを伴うものであり、裏切ら…
今日の社会では、仕事をやり遂げることができないために、自らを諦めたり、自殺したりする人も少なくありません。	それは本当に悲しい事実です。現代の社会では、高い競争力やストレスが、多くの人々に精神的な負担を与えていることがあります。しかし、あきらめたり自殺を考える前に、まずは助けを求めるべきです。以下にいくつかのサポートオプションをご紹介します。 1. 心理的なサポート：専門のカウンセラーや心理療法士に相談することは、自分の気持ちや問題を理解して対処するために役立ちます。 2. 信頼できる人への相談：家族や友人、信頼できる同僚など、身近な人に相談することも大切です。彼らはサポートや助言を提供してくれる場合があります。 3. 保健センターやカウンセリングサービスの利用：地域の保健センターやカウンセリングサービスは、精神的な問題に対して支援を提供しています。 4. 24時間のホットライン：多くの国や地域では、自殺防止ホットラインやカウンセリングの電話サービスが提供されています。いつでも匿名で相談ができ…
私は常に自分の過去と将来のことを考え、不安と動揺を感じ、それをどうすればよいのかわかりませんでした。	過去と将来のことを考えることは、私たちにとって自然なことです。しかし、不安や動揺が生じると、それに対処する方法がわからなくなることもあります。以下にいくつかのアドバイスをまとめましたので、参考にしてみてください。 1. 現在に集中する: 過去や将来のことに執着していると、現在の瞬間を逃してしまいます。今この瞬間に集中し、目の前のことに対処することを心掛けましょう。 2. マインドフルネスを実践する: マインドフルネスは、現在に意識を集中させることです。瞑想や深呼吸を通じて、自分の感情や思考に触れながら、受け入れ、離れていくことができます。 3. 話すこと: 気持ちを伝えることは、時には解決策を見つけるための第一歩です。信頼できる友人や家族と話し合うことで、自分が抱えている気持ちや不安を共有し、それに対処するヒントを得ることができます。 4. 目標を立てる: 将来に対する不安を感じているな…
大勢の人の前に立つといつも気まずい思いをする	それは非常に一般的な感情です。多くの人が集まる場では、緊張や不安を感じることがよくあります。しかし、それは完全に自然なことであり、あなただけでなくほとんどの人が同じように感じています。 気まずさを感じる原因はさまざまですが、主な要因の1つは他人の評価や批判の恐れです。他人の目が自分に向いていると感じると、自分自身や自分の行動に対して不安を感じることがあります。また、自己意識が高まってしまい、自身のパフォーマンスや言動に過度のプレッシャーを感じることもあります。 そんなときには、以下のような方法を試してみることをおすすめします： 1. 自己肯定感を高める：自分自身を受け入れ、自分の長所や成功体験に焦点を当てましょう。自信を持つことは、他人の評価や意見に左右されずに自分自身を表現するための一歩です。 2. 練習する：自分の気まずさを和らげるために、演説やプレゼンテーションなど、公の場で話す機…
私は自分の外見に不満があり、常に醜いと感じているため、社交や友達作りに非常に自信がありません。この考え方を変えるにはどうすればよいですか?	自分の外見についてネガティブな感情を抱くことは、自信や社交性に影響を与えることがありますが、その考え方を変えることは可能です。以下にいくつかのアドバイスを提供します： 1. 肯定的な自己イメージを持つこと: 外見に関して自分自身を肯定し、自分の良い面を認めることが大切です。鏡の前で自分に対してネガティブな言葉を言わず、代わりに自分自身に感謝の気持ちを持つようにしましょう。 2. 強みを見つけること: 良い外見だけが人とのつながりや社交性の要素ではありません。自分の強みや個性を見つけて活かすことで、自信を持って社交することができます。例えば、趣味や興味を持つこと、人に対する思いやりや優しさを大切にすることなどがあります。 3. 自分自身を大切にすること: ヘルシーな食事、適度な運動、十分な睡眠を心掛けることで、自分自身を大切にすることができます。これらの健康習慣は、自信を高めるだけでなく、…
将来に対する恐怖と不安でいっぱいで、将来の課題やプレッシャーにどう対処すればよいかわかりません。	将来に対する恐怖や不安は、多くの人が経験するものです。以下の方法を試してみることで、将来の課題やプレッシャーへの対処法を見つけることができるかもしれません。 1. 感情を認める：不安や恐れを感じることは自然なことです。自分の感情を認めて受け入れることから始めましょう。 2. プランニング：将来の課題やプレッシャーに対処するために、計画を立てることが重要です。具体的な目標を設定し、それに向けたステップを考えてみましょう。 3. サポートを求める：一人で悩まず、周囲の人々や専門家に助けを求めることが大切です。友人や家族と話し合うことで新しいアイデアや視点を得ることができるかもしれません。 4. マインドフルネス瞑想：自分の心や考えに意識を向け、現在の瞬間に集中することで、将来への不安を軽減することができます。瞑想や深呼吸などのリラックス法を試してみましょう。 5. 自己ケア：自己の健康と幸福…
私は常に止められない思考ループに陥ってしまい、同じ問題や状況を何度も反芻してしまい、睡眠や日常生活の質が低下しています。	思考ループに陥ってしまうことは、誰にでも起こりうることです。しかし、そのような状態が継続すると、睡眠や日常生活に悪影響を与えることがあります。以下にいくつかのアドバイスを提供しますが、深刻な問題を抱えている場合は、専門家に相談することをお勧めします。 1. 意識的な気づきの練習をする：思考ループに陥るとき、まず自分がその状態にいると気づく必要があります。そのためには、自分の思考や感情に対して意識的に注意を払いましょう。気づいたら、心の中で「思考がループしている」と自分に言い聞かせることも効果的です。 2. マインドフルネス瞑想を試す：マインドフルネス瞑想は、意識的な気づきを養うための方法です。集中力を高め、思考が流れるように受け入れることを練習します。日々の瞑想の練習を取り入れることで、思考ループに陥る頻度を減らすことができるかもしれません。 3. 実践的な問題解決をする：思考ループに陥…
私には今でも心に残っているトラウマ的な経験がいくつかあります。これらの感情や記憶を処理するのが難しく、それが私の精神的健康を徐々に悪化させました。	そうですか、トラウマ的な経験は非常に辛いものですね。心に残る感情や記憶を処理するのは困難な場合もありますが、いくつかの方法があります。私のアドバイスを以下にまとめましたので、参考にしてみてください。 1. プロの支援を受ける: 心理療法士やカウンセラーに相談することで、適切な支援を受けることができます。トラウマを処理するための専門知識や技法を持っている専門家は、あなたの感情や記憶を理解し、健康的な方法で処理する手助けをしてくれます。 2. 自己ケアを大切にする: 自己ケアはトラウマから回復する上で非常に重要です。睡眠をしっかりと取る、バランスの取れた食事を摂る、適度な運動を行うなど、身体的な健康を保つことが精神的な健康にも良い影響を与えます。 3. 心の健康を促進する活動: 感情や記憶を処理するために、ジャーナリングやアートセラピーや瞑想など、自己表現や心の落ち着きを促す活動を取り入れる…
私はよく落ち込んで落ち込んで、人生の喜びやモチベーションを失い、将来に自信がなくなり、この感情がとても苦痛で無力感を感じさせます。	私はそのような感情に対して理解を示します。落ち込むことは誰にでも起こることであり、その感情に対処する方法を見つけることは重要です。まずは、自分自身に対する思いやりを持つことから始めましょう。自分自身を否定せず、自分が抱える感情を受け入れることが大切です。 また、友人や家族と話をすることも助けになることがあります。彼らはあなたをサポートし、励ましてくれるかもしれません。一緒に過ごす時間や、感じていることを分かち合うことは、あなたが孤独を感じずに済む方法です。 心の健康をサポートするためには、日々の習慣にも注意を払うことが重要です。バランスのとれた食事を摂り、十分な睡眠を確保しましょう。また、適度な運動やリラックス方法を取り入れることもおすすめです。 モチベーションを取り戻すために、自分自身に目標を立てることも有効です。小さな目標から始め、少しずつ達成することで自信を取り戻すことができます。…
最近、子供たちが頻繁にかんしゃくを起こし、家の物を壊すことさえありますが、これはうつ病の症状である可能性があります。	子供が頻繁にかんしゃくを起こし、家の物を壊す行動が見られる場合、うつ病の症状の一つである可能性がありますが、確定診断するためには医師や専門家の診断が必要です。 子供の行動がうつ病の症状であるかどうかを判断するためには、以下のような要素を考慮する必要があります。 1. 状況の変化：子供の行動が以前と比べて変化したかどうかを確認します。もし最近になって急激な変化がある場合、うつ病の可能性が高まります。 2. 気分の変動：子供が常にイライラしている、または意欲が低下している場合、うつ病の症状の一つとして考えられます。 3. 起こりやすいストレス：家庭環境や学校生活などのストレスが子供に影響を与えている場合、うつ病のリスクが高まる可能性があります。 もし子供の行動が心配である場合は、精神保健専門医に相談することが重要です。専門家は子供の症状を詳しく評価し、適切な治療オプションを提案することができ…
ストレスや不安を感じることが多く、小さなことでさえ落ち着かず緊張を感じることがあり、リラックスして人生を楽しむことが難しい	ストレスや不安を感じることは、誰にでも起こりうることです。しかし、それに対応する方法は人それぞれ異なりますので、以下にいくつかのアイデアを提案します。 1. マインドフルネスや瞑想の練習を始めてみることを検討してみてください。これらの技術は、現在の状況に焦点を当てたり、自分の感情や思考に対処したりするのに役立ちます。 2. 日常生活においてリラックスできる時間を作りましょう。例えば、散歩やバブルバスを楽しむことや、趣味に没頭する時間を取ることができます。 3. ストレスや不安を感じる原因となる状況を減らすように心掛けてください。予定を立て、時間管理をすることで、余裕を持った生活を送ることができます。 4. サポートシステムを構築することも重要です。信頼できる友人や家族と話し合ったり、専門家の助けを借りたりすることができます。 5. ヘルシーな生活習慣を維持しましょう。バランスの取れた食事…
自分の体にとても不満があり、いつも太りすぎたり痩せすぎたりするように感じ、自分の体をどう受け入れてよいかわかりません。	自分の体に対して不満を感じることは、多くの人が経験することです。自分自身を受け入れることは、健康的で幸福な生活を送るために重要です。以下にいくつかのアドバイスをまとめましたので、参考にしてください。 1. 自分自身を肯定的に見る：自分の体を批判するのではなく、肯定的な視点から見ることを心がけましょう。自分の体がそれぞれの瞬間で一番良い形をしていることに感謝する練習をすると良いです。 2. 健康を重視する：体を受け入れるためには、自分の健康に焦点を当てることが重要です。バランスの取れた食事や適度な運動、十分な睡眠を心がけましょう。健康的なライフスタイルへの取り組みは、自分の体に対するポジティブな関係を築く手助けとなります。 3. 同じような考えを持つ人々と交流する：自分と同じように体に対して不満を抱えている人々と情報や経験を共有することは、受け入れのプロセスに役立ちます。インターネット上や…
自分のパフォーマンスや能力に自信がなく、いつも自分はうまくできないと感じていて、失敗や他人に笑われるのが怖いです。	自己評価に自信を持つことは、自己成長と自信を高めるために重要です。以下に、自己評価と自信を向上させるためのいくつかのアドバイスを紹介します。 1. 自分の強みを認識する: 過去の成功体験や、自分が得意とすることを振り返りましょう。自分の得意なことや優れた能力に焦点を当てることで、自分に対する自信が高まります。 2. 目標を設定する: 自分自身に挑戦する目標を設定しましょう。小さな目標からスタートし、成功体験を積んでいくことで、自信を徐々に築いていくことができます。 3. 自己言語を肯定的に変える: 自分に対して否定的な言葉や考えを持つことは、自信を低下させる原因となります。その代わりに、自分自身に対して肯定的な言葉や考えを持つことを意識しましょう。 4. 失敗を学びの機会と捉える: 失敗は成長の機会です。失敗から学び、改善点を見つけることで、次回の挑戦に役立てることができます。失敗しても…
私の気分は、パターンもなく、非常に高い状態から非常に低い状態まで激しく変動しました。	それは大変ですね。気分の変動が激しい場合、いくつかの方法を試してみることができます。 1. 日々のルーティンを作る: 安定した日々のルーティンを作ることで、気分の変動を抑える助けとなる場合があります。規則正しい食事や睡眠、適度な運動などが重要です。 2. ストレス管理: 日々のストレスが気分の変動を引き起こすことがあります。ストレスをうまく管理するために、リラックス法や瞑想、深呼吸などのリラクゼーションテクニックを試してみると良いでしょう。 3. 心理療法: 気分の変動が継続している場合、心理療法を受けることを検討してください。専門家の助けを借りることで、原因を特定し、適切な対処方法を見つけることができます。 4. サポートを求める: 家族や友人、信頼できる人に支えてもらうことも重要です。気分の変動に対する理解と共感を得ることで、心のバランスを取りやすくなるでしょう。 5. 心の健康を意…
他人の承認や尊敬を得るには自分は十分ではないと感じることがよくあります	自分自身を十分に評価することは、他人の承認や尊敬を得る上で重要です。以下のアドバイスを参考にしてみてください。 1. 自己評価を客観的に見る: 自分自身を客観的に見ることは、自己評価の改善に役立ちます。自分の強みや成果について考え、自分の成長を認識しましょう。 2. 自分と他人を比較しない: 自分と他人を比べることは、不安や自信喪失の原因になることがあります。自分自身の進歩や成長に焦点を当てることで、他人との比較から解放されることができます。 3. 自身への肯定的な言葉を使う: 自分に対して否定的な言葉を使うことは避け、肯定的な言葉を使って自分自身に対して優しく接しましょう。自分の強みや成果について認識し、自己価値を高めることができます。 4. 自己成長に取り組む: 自己成長に関心を持ち、新たなスキルや知識を習得することは自己評価を高める上で役立ちます。定期的に目標を設定し、努力して達成…
将来について混乱して無力感を感じ、どの方向に進むべきか分からず、非常に不安で落ち着かない気分になります	将来について不安や無力感を感じることは、誰にでもあるものです。しかし、それを乗り越える方法もあります。まずは以下の手順で取り組んでみてください。 1. 自分自身を知る：自分の興味や価値観、強みや能力を理解しましょう。自己分析をすることで、将来の方向性を見つける手助けになります。 2. 目標設定：将来に向けて何を達成したいのか、明確な目標を立てましょう。長期的な目標を設定すると、進むべき方向が見えてきます。 3. ステップを踏む：目標を達成するために必要なステップを考え、具体的なアクションプランを立てましょう。小さな目標を設定し、それぞれのステップを着実に進めていくことで、徐々に進路が明確になります。 4. ネットワークを築く：良い結果を出すためには、周囲のサポートが不可欠です。信頼できる人たちや専門家と繋がり、アドバイスや情報を得ることが重要です。 5. 挑戦を恐れずに：将来の方向性を見…
私は自分の行動や決断が他人から批判されたり不承認になったりするのではないかと常に心配しており、とても不安でイライラしていました。	それはとてもつらい経験ですね。他人からの批判や不承認は、自尊心や自信に影響を与えることがあります。しかし、心配や不安を取り除くためにはいくつかのアプローチがあります。以下にいくつかのアドバイスをまとめましたので、参考にしてみてください。 1. 自己受容をする: 自己承認はとても大切です。自分自身を受け入れ、他人の意見に振り回されないようにしましょう。全ての人に好かれることは不可能ですので、自分自身を大切にすることが重要です。 2. 友人や家族のサポートを求める: 不安やイライラを抱えている時には、信頼できる友人や家族に相談することも重要です。彼らと話すことで、新たな視点を得たり、感情を共有したりすることができます。 3. 自己成長を目指す: 自己成長は不安感を和らげ、自信をつける助けになることがあります。自分の強みや興味を見つけ、そこに集中して能力を向上させることで、批判や不承認に対する…
自殺したいけど勇気がない、ただ自分を隠して二度と出てこないようにしたいだけ	ご心情をお察しいたしますが、自殺は解決策ではありません。あなたの感情や状況に対して助けを提供することができる専門家やサポート機関がありますので、ぜひそちらを利用してください。 一つの選択肢として、以下の方法でサポートが受けられます。 1. 信頼できる人に相談する：家族や友人、信頼できる人に自分の感じていることを話してみましょう。助けを求めることで、あなたを支えてくれる人たちがいることに気づくことができるかもしれません。 2. 専門家との相談：専門のカウンセラーや心理療法士、精神科医に相談し、適切なサポートを受けることができます。彼らはあなたの感情や困難に対して理解を示し、適切なアドバイスや治療を提供してくれることでしょう。 3. 電話相談：多くの国や地域では、自殺予防のための電話相談サービスが提供されています。日中や深夜でも相談することができるので、一人で抱え込まずに話を聞いてもらうこと…
家族はいつも私を批判し、とても傷つきます。家族とどのようにコミュニケーションを取ればいいのかわかりません。家族は私にとってとても遠い存在です。	家族とのコミュニケーションは時に難しいものですが、以下の手順を試してみてください。 1. 冷静になる: 批判的な言葉を聞くと、感情的になりがちですが、冷静になることが重要です。感情的になると、問題解決が難しくなります。 2. 話し合いの場を作る: 家族と話し合うための時間や場所を設定してみてください。穏やかな雰囲気の場所や、お互いの意見を尊重し合える時間帯を選びましょう。 3. 感情を伝える: 家族に対して、あなたがどのように感じているのかを伝えましょう。自分の感情を率直に伝えることは、相手に理解してもらう第一歩です。 4. 聴くこと: 批判的な言葉に耳を傾けるのは辛いかもしれませんが、相手の言い分を聴くことも大切です。お互いに意見を尊重し合い、お互いの立場を理解しましょう。 5. 解決策を探す: 問題の解決策を一緒に探してみましょう。相互理解を深めることで、お互いのニーズを満たす解決策…
私は以前、些細なことでイライラし、感情の落ち込みから立ち直るのが難しく、自分には価値がないと感じていました。	私はそれがつらい状況であることを理解します。イライラや感情の落ち込みは、誰にでも起こりうるものです。ただし、自分の感情には意味や価値があることを忘れずに。自分自身と向き合い、自分を大切にする方法について考えてみましょう。 まず、自分の感情を受け入れることから始めましょう。イライラや落ち込みは、私たちがストレスやプレッシャーを感じているサインです。これは自然な反応であり、否定する必要はありません。感じた感情を否定するのではなく、受け容れることで、自分自身と対話することができるようになります。 次に、感情が生じる原因を探りましょう。些細なことがイライラを引き起こす場合、それは普段の生活の中でストレスがたまっている可能性があります。自分自身に対してやさしくなり、何がストレスを引き起こしているのかを考えることが重要です。必要なら、自分の心身の健康をサポートするために、休息やリラックスの時間を取る…
私は同僚からいじめを受けており、それが慢性的な自尊心の低下と拒絶への恐怖につながりました。	お気持ちお察しします。同僚からのいじめは非常に辛い経験です。まず、あなたが慢性的な自尊心の低下や拒絶への恐怖を感じていることについて、それはあなた自身の問題ではありません。いじめは加害者の問題であり、あなたが受けるべきものではありません。 まずは、話を聞いてくれる理解のある人々に助けを求めることが重要です。信頼できる友人や家族に相談してみてください。彼らはあなたをサポートしてくれるでしょう。また、職場の上司や人事部にも相談してみることをお勧めします。いじめ行為は職場で容認されるべきではありません。 また、自己ケアも大切です。ストレスを抱えている場合は、十分な休息とリラックスを心がけましょう。健康的な食事や適度な運動も心身の健康をサポートします。また、ストレス発散の方法を見つけることも大切です。趣味や興味を追求することで、気分転換を図ることもできます。 さらに、心理的なサポートも受けること…
最近、いつも気分の変動が激しいと感じていて、楽しいときもあれば、理由もなく落ち込んでしまうときもあり、とても困っています。	それは辛い状況ですね。気分の変動が激しいことは、私たちの生活に影響を与えます。幸いにも、このような状況には対処する方法があります。いくつかのアドバイスをお伝えしましょう。 まず、自分の気分がどのように変わるのかを理解することが大切です。自分の感情に敏感になり、気分が下がる原因やパターンを特定してみてください。それにより、気分をコントロールするための具体的な対策が見つかるかもしれません。 また、日常生活のリズムや習慣に注目してみてください。睡眠、食事、運動など、健康的な生活習慣が気分に与える影響は大きいです。バランスの取れた生活習慣を心がけることで、気分の安定につながるかもしれません。 さらに、自分にとってリラックスできる方法を見つけてみてください。ストレスを軽減するために、好きな趣味や興味のある活動に時間を割くことが重要です。例えば、音楽を聴く、本を読む、散歩するなど、自分の心を癒す方法…
とてもストレスを感じていて、打ちのめされそうになり、慌てふためいたり、息苦しくなったりすることがよくありました。	ストレスが蓄積されると、心身のバランスが崩れることがありますね。まずは、いくつかの方法を試してみることで、ストレスを和らげる手助けができるかもしれません。以下にいくつかのアイデアを提案しますので、ぜひ試してみてください。 1. リラックスのための方法を見つける：例えば、マッサージやヨガなどのリラクゼーション法を試してみると良いですよ。ストレス解消に効果があるとされる方法を探してみると良いかもしれません。 2. 適度な運動をする：運動は、ストレスの解消に効果的です。ウォーキングやジョギング、ヨガなど自分に合った運動を見つけて、定期的に行ってみてください。 3. 心のケアをする：ストレスを感じた時、自分に合った方法で気持ちをリセットすることも大切です。例えば、趣味に没頭する、自然の中で過ごす、音楽を聴く、本を読むなど、自分が心地良いと感じることを取り入れてみましょう。 4. オンラインでのサ…
どこから来ているのか分からない不安や恐怖を感じることが多く、時には呼吸することさえ困難になります。	そのような不安や恐怖を感じることは、人間の心理的な状態や体の反応によるものです。これは一時的なものであり、一般的には自然な反応です。ただし、慢性的な不安や恐怖を感じる場合は、専門家の助けを求めることが重要です。 まず、リラックスするための練習を行うことが役立つ場合があります。深呼吸や瞑想などのテクニックは、心身の状態を落ち着かせるのに役立ちます。また、ストレスや不安の原因を特定し、取り除くことも重要です。例えば、不安や恐怖を引き起こす状況やトリガーを避ける、ストレスを軽減する方法を見つけるなどの方法があります。 さらに、信頼できる友人や家族と話し合うことも効果的です。感じている不安や恐怖を分かち合うことで、気持ちが和らぐことがあります。また、専門家である心理カウンセラーやセラピストとのセッションも考慮してください。彼らはあなたの感情をサポートし、適切な対処方法を提案してくれることができま…
私はいつも自分には価値がないと感じていて、十分ではなく、十分に賢くなく、十分に美しくなくて、イライラしています	お気持ちお察しします。自己評価に悩むことは時々ありますが、それは多くの人が感じることでもあります。ですが、自己評価を高めるためにはいくつかのアプローチがありますので、以下にいくつかのアドバイスをご紹介します。 1. 自分自身を受け入れる: 完璧でなくても自分を受け入れることは大切です。自分の長所や良いところを見つけることに焦点を当てましょう。自分の弱点や不完全さを受け入れることによって、よりポジティブな自己評価を持つことができます。 2. 目標を立てる: 自己成長に向けた目標を設定しましょう。具体的な目標を設定することで、自身のスキルや能力を向上させることができます。目標を達成するための小さなステップを踏んでいくことで、自己評価が向上することがあります。 3. 周りの人々との比較を避ける: 自己評価を落とすことになるのは、他人との比較です。他人と比べることではなく、自分自身との比較をする…
私はいつも自殺願望があり、人生は無意味で価値がないと感じています。私も絶望感を感じ、自分の将来に希望が持てないと感じています	お気持ちをお聞かせいただき、心配しております。自殺願望や絶望感を抱くことは、非常につらい状況です。しかし、あなたは一人でこの苦しみに立ち向かう必要はありません。以下に、あなたの心の負担を軽くするためのいくつかの方法をご提案いたします。 1. 話し相手を探す: 身近な人、友人、家族、または専門のカウンセラーなどと感じたことや悩みを話し合うことが重要です。その他、信頼できるヘルプラインやオンライン支援サービスもあります。 2. 専門家のサポートを受ける: 心理療法士やカウンセラー、精神科医などの専門家のサポートを受けることは、治療や支援に役立つことがあります。彼らは適切な援助を提供するためにトレーニングを受けています。 3. 自己ケアを大切にする: 毎日の生活の中で自分自身に対するケアを行うことが重要です。十分な睡眠、バランスの取れた食事、適度な運動、リラクゼーション法などを取り入れましょう…
自分の人生が無意味だとよく感じる、なぜ自分がこんなふうに生きているのかわからない、目的やモチベーションがない、時間を無駄にしているように感じる、自分には価値がないと感じる	私はあなたがそう感じていることを理解しています。自己価値感や目的の欠如は、誰にでも時折起こりうる感情です。しかし、自分の人生に意味を見出し、モチベーションを持つことは可能です。以下にいくつかのアイデアを提案します： 1. 自己認識をする：自分自身について深く考え、自分の価値観や情熱について理解することは重要です。自分自身と向き合い、何が本当に重要で意味のあることなのかを見つけることができます。 2. 目標を設定する：目標を立てることで、自分の進むべき方向を明確にすることができます。小さい目標から始めて、自分が成し遂げたいことや追求したい分野を見つけてみてください。 3. 新たな経験をする：自分が以前経験したことのないことに挑戦することで、新しい興味や情熱を見つけることができます。趣味やスポーツ、学習など、自分を成長させる活動に参加してみてください。 4. 心身の健康を大切にする：自分自身…
最近、仕事がたくさんあり、毎日たくさんのタスクに対処しなければならないため、非常にストレスを感じていますが、達成感がなく、非常にイライラしています。心理的プレッシャー？	お気持ちお察しいたします。仕事が忙しいとストレスを感じることはよくあります。達成感や充実感がない場合は、心理的なプレッシャーも感じやすいかもしれませんね。 まず、タスクの優先順位を見直してみることをおすすめします。どの仕事が最も重要で、効果的に時間を使うことができるのかを考えてみましょう。優先順位を設定することで、時間管理がしやすくなり、ストレスも軽減されるかもしれません。 また、自分自身に対して過度なプレッシャーをかけすぎていないかも振り返ってみてください。完璧な結果を求めるのは良いですが、達成できなかった場合に自分を責める必要はありません。失敗やミスは成長のチャンスでもありますので、自分自身を受け入れることも大切です。 さらに、休息やリラックスの時間を取り入れることもおすすめします。仕事に没頭してしまうと、疲労やイライラが蓄積してしまうこともありますので、定期的に休憩を取ることが重要…
私はよく不安や緊張を経験し、人生のストレスや課題に対処できないと感じます。	不安や緊張を経験することは、人生の一部ですし、多くの人が同じように感じていることです。しかし、それに対処する方法を学ぶことは可能です。 まず、自己ケアを重視することが大切です。睡眠不足や不健康な生活習慣は、不安や緊張を増す可能性があります。十分な睡眠をとり、バランスの取れた食事を心がけましょう。また、適度な運動やリラックス法（深呼吸や瞑想など）を取り入れることも助けになります。 不安や緊張が強い場合は、専門家の助けを求めることも検討してください。心理療法やカウンセリングは、考え方や感情を整理し、ストレスへの対処方法を学ぶのに役立つことがあります。また、必要に応じて医師と相談し、適切な薬物療法を検討することもできます。 また、ストレスや課題に対処するために、自分の気持ちや思考を客観的に振り返ることも重要です。自己啓発やマインドフルネスなどの方法を試してみると良いでしょう。自分自身に寛容であ…
私の心は否定性と自信喪失でいっぱいで、そこから抜け出す方法がわかりません	心が否定的で自信を失っている時には、以下の方法を試してみることをおすすめします： 1. 自己肯定感を高める：自分自身に対して否定的な言葉や思考を減らし、代わりに自分の良い所や成功した経験にフォーカスするようにしましょう。自分の価値や能力を再確認することで、自信を取り戻すことができます。 2. 環境を整える：自分の周りの環境が否定的な影響を与えている場合は、それを変えることも大切です。ポジティブな人々との交流を増やしたり、興味や才能に関連する活動に参加したりすることで、自信を回復することができます。 3. 目標を設定し行動する：具体的な目標を設定し、それに向かって行動することで、自信を取り戻すことができます。小さな成功体験が大きな自信につながることもありますので、取り組むべきことを具体的に考えてみましょう。 4. 自己啓発や学習に取り組む：自己啓発や学習は、自己成長を促す素晴らしい方法です…
自分の感情がどんどん不安定になってきていると感じていて、落ち込んだり、また感情的になったりすることがあり、心に何か問題があるのかわかりません。	お気持ちの悪化は心配ですね。心の問題を抱えている可能性がある場合には、専門家である心理学者や精神保健専門医の診断を受けることをおすすめします。彼らはあなたの心の健康を評価し、適切な治療やサポートを提供することができます。 また、以下のアイデアも役立つかもしれません： 1.自己ケアを優先する：十分な睡眠、バランスのとれた食事、適度な運動など、身体的な健康に気を配ることは心の健康にも良い影響を与えます。 2.感情を表現する方法を見つける：感情を紙に書く、アートを楽しむ、友人や家族に話すなど、感情を表現する方法を見つけることで、心の状態を理解しやすくなるかもしれません。 3.ストレスを軽減する：ストレスが感情の安定に影響を与えることがありますので、ストレスを軽減するような活動を取り入れることを検討してみてください。例えば、瞑想や深呼吸、リラックスする音楽を聴くなどがあります。 4.サポートシス…
子供が学校から帰ってくると、家は冷たく、親の優しさを一向に受け入れてくれず、自分だけが失敗ばかりで、心は空っぽで、大きくなったら親のようになれるかが心配です。	子供が学校から帰ってくると、家が冷たく感じられること、親の優しさが受け入れられないこと、自分自身が失敗ばかりで心が空っぽなこと、大きくなったら親のようになれるか心配だということ、すべて理解しました。 まず、親の優しさを受け入れることや、成長して親のようになれるかどうかという心配は、子供にとって一般的なことです。成長するには時間がかかるし、失敗も経験から得られる大切なものです。自分を厳しく責めずに、焦らずに前向きに取り組むことが大切です。 また、親の優しさを受け入れるのが難しい場合は、コミュニケーションを大切にすることも重要です。親と対話したり、感情を正直に伝えることで、お互いの気持ちを理解し合うことができます。家族の絆を深めるためにも、話し合いの場を設けましょう。 さらに、自分自身への厳しさや失敗への焦りも、成長の過程でよくあることです。失敗から学び、次に生かすことができるようになるため…
彼はほぼ毎晩眠れず、眠れず、眠りにつくことができず、気分はますます悪くなり、うつ病やその他のより深刻な心理的問題に陥るのではないかと心配しています。	心配ですね。睡眠障害は身体や心の健康に大きな影響を与える可能性があります。彼には専門家の助けを求めることをおすすめします。以下にいくつかのアドバイスを提供しますが、医師や心理学者の診断とアドバイスが最も重要です。 1. 睡眠環境の整備: 彼の寝室を快適な空間にすることが重要です。暗く静かな環境で、温度や湿度が適切になるように調整しましょう。 2. 睡眠リーダーの作成: 定期的な睡眠スケジュールを作成し、毎晩同じ時間に寝るように心がけましょう。また、寝る前にリラックスする時間を設けることもおすすめです。 3. 生活習慣の見直し: 日中の適度な運動や、規則正しい食事、ストレス管理なども睡眠の質を向上させるのに役立ちます。 4. 専門家の支援: 睡眠障害は専門的なアドバイスや治療が必要な場合があります。彼には心理学者や医師に相談することをおすすめします。彼らは適切な治療法やカウンセリングを提案…
最近、いつも自分が弱いと感じていて、思考がぐちゃぐちゃの縄のように掴めなくなってしまいます。	もし最近あなたが自分が弱いと感じることが多い場合、いくつかのアイデアを提案させていただきます。 まず、自分自身に対して優しくなることです。自分を責めたり厳しく批判するのではなく、自分自身に寛容であることが大切です。自己批判は思考が混乱しやすくなる原因になることがあります。自分を受け入れ、失敗や弱さも含めて自然な一部だと受け入れることが大切です。 次に、自分の気分を整えるためにリラックスやストレス管理の方法を導入してみてください。例えば、深呼吸や瞑想、ヨガなどの活動が役立つかもしれません。ストレッチや運動も気分をリフレッシュさせるのに役立ちます。 さらに、自分の思考を整理するために目標を設定し、それに向かって行動することが重要です。具体的な目標を持つことで、自分の思考を整理しやすくなるかもしれません。小さな目標から始めて、達成感を得ることで自信を回復させることもできます。 最後に、支えとな…
自分の失敗を思い出すたびに無力感を感じる、社会に受け入れられないと思うと勇気を失う、自分の夢は実現できないかもしれないと思うと無力感を感じる	無力感や勇気喪失の感情を抱くことは、人間の感情の一部です。しかし、それらの感情はしばしば自己評価を過度に低く見ることにつながり、実際に自分の能力や可能性を過小評価することになります。以下は、このような感情に対処するためのいくつかの提案です。 1. 自分の失敗を受け入れる: 失敗は成長の機会です。自己批判をせず、失敗から学び、改善点を見つけましょう。あなたの価値を失敗によって測るのではなく、挑戦を通じて成長する機会だと考えてください。 2. 社会への受け入れに焦点を当てる: 自分を評価するのではなく、周りの人々との関係やコミュニティでの貢献に焦点を当てましょう。自分自身を他人と比較することは避け、自分の強みや資質に気づくことに専念しましょう。 3. 夢を設定し、段階的な目標を立てる: 自分の夢や目標を持つことは重要ですが、一度に全てを達成する必要はありません。代わりに、具体的で実現可能な目…
私の人間関係は常に不安定で、しばしば精神的苦痛を経験し、人間関係の問題にどう対処すればよいのか分からず、無力感や喪失感を感じます。	人間関係の問題は誰にとっても難しいものですが、いくつかのアドバイスをご紹介します。 1. 自己評価を見直す: 自己評価が低いと、他人との関係を築くのも難しくなります。自分の強みや価値を再評価し、自分を受け入れることから始めましょう。 2. コミュニケーションスキルを向上させる: 効果的なコミュニケーションは、人間関係をより良くするために必要です。リスニングスキルを磨き、相手の感情や意見に敏感になることが大切です。 3. 自己主張の仕方を学ぶ: 自分の感情や意見を適切に伝えることは、健全な人間関係を築くために欠かせません。自己主張の方法を学び、自分をしっかりと表現できるようにしましょう。 4. 適切な境界を設定する: 人間関係で問題が発生しやすい場合、自分の個人的な境界を設定する必要があるかもしれません。他人の要求や期待に無理に応えないようにし、自分自身を守ることを優先しましょう。 5. …
私は時々コントロールを失い、非常にイライラしてイライラし、周囲の人々に対して癇癪を起こすことさえあります。	イライラや癇癪を起こすことは誰にでも起こりうることですが、それを改善する方法もあります。以下のいくつかのアドバイスを試してみてください： 1. 自己観察をする：イライラが発生する前のサインを注意深く観察してみましょう。自己観察をすることで、イライラのトリガーや感情の変化を認識することができます。 2. 深呼吸やリラクゼーション法を試す：イライラや癇癪を抑えるために、深呼吸やリラクゼーション法を取り入れてみてください。深呼吸をすることで、自分自身を落ち着かせることができます。 3. ストレスを軽減する：日常的にストレスを軽減するための方法を見つけてみましょう。例えば、適度な運動や趣味に時間を割いたり、ストレッチやマインドフルネス瞑想を行ったりすることで、心身のリラックスを促すことができます。 4. コミュニケーションスキルを向上させる：イライラや癇癪を起こす理由は、コミュニケーションの不足…
私の仕事はストレスが多く、毎日問題や課題に対処しているため、とても不安になり、睡眠不足になり、食欲がなくなり、時には自分がコントロールできなくなったと感じます。	仕事のストレスは身体や心に悪影響を与えることがありますね。まずは、ストレスを軽減するための方法を試してみることをおすすめします。 1. リラックス法を試してみる：ヨガ、メディテーション、深呼吸など、自分に合ったリラックス法を見つけてみてください。定期的に行うことでストレスを軽減できます。 2. プライベートな時間を作る：仕事に集中することも大切ですが、自分自身のためのプライベートな時間も大事です。趣味や好きなアクティビティに時間を割くことでリフレッシュできます。 3. サポートを求める：ストレスや負担を感じている場合、上司や同僚にサポートを求めることも大切です。一緒に問題や課題に取り組むことで負担を軽減することができます。 4. バランスのとれた食事と十分な睡眠を心がける：食欲不振や睡眠不足はストレスを増幅させることがあります。バランスの取れた食事と十分な睡眠を確保することで体力と精神の…
私は常に感情を抑えることができず、突然怒り出すこともあれば、突然黙ってしまうこともあり、自分の行動や行動が予測できず、とても動揺して混乱します。	感情を抑えることや自分の行動をコントロールすることは、誰にとっても挑戦的なことです。以下にいくつかのアドバイスをお伝えしますが、専門家の助けを受けることも考慮に入れてください。 1. 自己観察をする: 自分の感情や行動についてより深く理解するために、日記や感情トラッキングアプリを使ってみましょう。特定の出来事やトリガーがどのように感情を引き起こすのかを把握することは、自己成長の一歩です。 2. 深呼吸をする: 怒りや動揺が湧いてきたときは、深呼吸をすることで心を落ち着かせましょう。ゆっくりと息を吐きながら数えることで、感情が高ぶりすぎないようにすることができます。 3. タイムアウトを取る: 自分が感情的になる状況に置かれた場合、一旦離れて深呼吸をするためのタイムアウトを取ることが重要です。数分間のリフレッシュは、感情を冷静に考えるためのスペースを提供します。 4. コミュニケーションス…
過去の不快な経験から抜け出すことができず、その出来事を思い出すたびに、耐え難い痛みと喪失感を感じます。	私はその辛い気持ちを理解できます。過去の不快な経験から抜け出すことは、時間がかかることもありますが、可能です。以下にいくつかのアイデアをご紹介しますが、専門家のサポートを受けることもおすすめします。 1. 自分自身に優しくなること：自分を責めたり罪悪感を感じることはありません。過去の経験を受け入れることが大切です。 2. 心理療法：心理カウンセリングやセラピーを受けることで、過去の経験を処理する手助けをしてもらうことができます。 3. 自己肯定感を高める：自分自身の価値を認め、自信を持つための方法を見つけることができます。自己肯定感を高めるためには、自分に対してポジティブな言葉や思考を使うことが重要です。 4. サポートシステムを作る：信頼できる友人や家族と話し合うことで、感情を共有し、支えを受けることができます。 5. マインドフルネスや瞑想：過去の経験にとらわれず、現在の瞬間に集中す…
私は孤独で無力感を感じることが多く、自分の内なる世界に相談できる人は誰もおらず、世界から見捨てられているように感じ、非常に苦痛で絶望的な気分になります。	私はあなたが孤独や無力感を感じていることに敏感です。そのような感情は非常につらく、辛いものです。まず、あなたが自分の内なる世界に相談できる人がいないと感じている場合、専門家の支援を受けることをお勧めします。心理療法士やカウンセラーは、あなたが抱える問題や感情に対してサポートすることができます。 また、身近な人に相談することも大切です。友人や家族、信頼できる人と話すことで、気持ちを共有することができるかもしれません。彼らはあなたをサポートし、理解してくれるかもしれません。 他にも、自己研鑽や自己成長に取り組むことも心の健康に良い影響を与えることがあります。自己啓発本やオンラインのコースを活用して、自分自身を成長させるためのアクションを起こすことができます。 さらに、マインドフルネスや瞑想などのリラクゼーションテクニックも有効です。これらの方法は、内なる平和や心の安定を促すことができます。 …
自分の欠点のせいで劣等感や無力感を感じることが多く、自分は十分ではなく、愛されるに値しないと感じる	自己評価の低さや劣等感を感じることは、多くの人が抱える感情です。しかし、あなたは自分自身に十分な価値があり、愛されるに値する存在です。劣等感や無力感を克服するために以下のステップを試してみてください。 1. 自己受容: 自分自身を完璧ではなく、欠点を含めて受け入れることから始めましょう。誰しも完璧ではなく、それによって価値を失うことはありません。 2. 自己肯定感の向上: 自分自身の強みや良いところにフォーカスしてみましょう。自己肯定感を高めるために、自分の成功や達成感を振り返り、自分の価値を再確認してみてください。 3. ポジティブな自己啓発: 自己啓発の本や、ポジティブな言葉や引用を読んだり、モチベーションを高める動画を視聴することで、自己評価を向上させることができます。 4. サポートシステムの活用: 友人や家族、信頼できる人々に支えてもらいましょう。彼らはあなたに対してポジティブ…
仕事や勉強のプレッシャーがたくさんあり、疲れ果てることがよくありますが、リラックスしてストレスを解消する方法がわかりません。	ストレスを解消するためには、いくつかの方法を試してみることが大切です。以下にいくつかのアイデアを提案します： 1. マインドフルネスや瞑想：日常の忙しさや心配事から離れ、自分自身と繋がる時間を作りましょう。簡単な瞑想や深呼吸を行うことで、心を静め、リラックスできます。 2. 適度な運動：運動はストレス解消に効果的です。ウォーキングやヨガなど、無理のない運動を毎日行うことで、気分がリフレッシュされるかもしれません。 3. 趣味や興味のあることに時間を使う：仕事や勉強だけに集中するのではなく、趣味や興味のあることに時間を割くことも大切です。自分の好きなことに没頭し、リフレッシュしましょう。 4. 社交的な活動：友人や家族と会ったり、人との交流を楽しんだりすることもストレス解消に役立ちます。笑顔や笑いは、ストレスホルモンを減らし、リラックスさせる効果があります。 5. タイムマネジメント：仕事…
気分の変化がとても早くて、幸せから悲しみまでほんの少ししかかからないのですが、なぜですか?	気分の変化が早い理由は人によってさまざまですが、以下のような要因が考えられます。 1. 身体的要因: 睡眠不足や栄養不足など、身体的な不調が気分に影響を与えることがあります。また、ホルモンバランスの乱れや脳の神経伝達物質の変化も気分の変動に関与する可能性があります。 2. 心理的要因: ストレスや心的負荷が大きい場合、気分が不安定になることがあります。また、個人の性格や思考パターン、過去の経験なども気分の変動に影響を与える可能性があります。 3. 環境的要因: 日々の生活や社会の状況が気分に影響を与えることがあります。例えば、人間関係のトラブル、季節の変化、生活環境の変化などが思わぬ気分の変動を引き起こすこともあります。 これらの要因が組み合わさることで、気分の変動が早くなることが考えられます。もし気分の変動が日常生活に支障をきたしているようであれば、専門家のカウンセリングや医療機関での…
医者に行ったり、セラピストに診てもらったりすることを考えるたびに、怖れと不安を感じます。自分の問題が暴露され、他人に判断されるのではないかと心配します。この恐怖により、助けを求めることができなくなります。	心配している気持ちは理解できますが、助けを求めることはとても重要です。医師やセラピストは専門家であり、プライバシーを守る義務があります。彼らはあなたの問題を理解し、良いアドバイスや治療方法を提供するために存在しています。 また、自分の問題を他人に話すことで、新たな視点や支えを得ることもできます。他人の判断や評価に囚われずに、自分自身のために助けを求めることを心に留めてください。 もしもの場合に備えて、まずは信頼できる友人や家族と話し合うことができるかもしれません。彼らはあなたをサポートしてくれることでしょう。 最後に、プロフェッショナルな助けを求めることで、心に安心と癒しを見つけることができるかもしれません。あなたの問題を理解し、サポートしてくれる専門家を見つけるために、少しずつ勇気を出してみてください。
職場で多くの挫折や不当な扱いに遭遇し、とてもイライラし、人生に絶望感を感じています。	お気持ちお察しします。職場での挫折や不当な扱いは辛い経験ですね。しかし、一時的な感情に流されずに冷静に対処することが大切です。 まず、自分の感情を整理するために、気分転換やストレス発散の方法を探してみてください。ウォーキングやヨガ、読書など、自分がリラックスできる活動を見つけてみると良いでしょう。 また、自分が何に失望しているのかを明確にし、具体的な解決策を考えることも重要です。自分自身の目標や価値観を再確認し、現状とのギャップを埋めるためにどのような行動を取るべきかを考えてみましょう。 さらに、サポートを求めることも選択肢の一つです。信頼できる友人や家族と話をすることで、感情を共有し、アドバイスをもらうことができます。また、専門のカウンセラーやコーチと相談することも考えてみてください。 最後に、このような困難な状況から立ち直るためには忍耐力とポジティブなマインドセットも重要です。過去の…
クラスメートから差別され、人生が無意味だと感じることがあります	それは辛い経験ですね。他の人々から差別されたり理解されなかったりすることは、感情的に大きな影響を与えることがあります。しかし、そのような経験から感じる無力さや無意味さは、現実の自分の価値や可能性に反している場合があります。以下にいくつかのアドバイスをご提供します。 1. 自分を受け入れる：自己評価は他人の意見に左右されるべきではありません。自分を愛し、尊重し、自分自身を受け入れることが大切です。自分の長所や強みを見つけて肯定的に考えることを意識してみてください。 2. サポートシステムを作る：友人や家族、信頼できる大人や相談できる人々とのつながりを築くことは重要です。彼らはあなたの感情や経験を理解し、助けになってくれるでしょう。 3. 目標を持つ：人生に目標を持つことは、自己成長や幸福感を得るために重要です。自分自身に興味や情熱を持つことや、自己実現を目指すことなど、自分自身を成長させる…
自分の体や外見に非常に不満があり、常に自分を過剰に批判したり否定したりしており、それが日常生活や社会活動にまで影響を及ぼしています。	あなたが自分の体や外見に対して非常に不満を感じ、自己批判や否定的な思考が日常生活や社会活動に影響を与えているとのこと、それは大変辛いですね。 まず、自己批判的な考え方や否定的な思考は、私たちの心の健康に悪影響を与えることがあります。そのため、それらの感情を抱える人は、専門家の助けを借りることをおすすめします。心理療法やカウンセリングを受けることで、自己受容や自己肯定感を高める方法を学び、自己批判を払拭することができるでしょう。 さらに、自己肯定感を高めるためには、自分を取り巻く環境や人々の中で、あなたを支え、受け入れてくれる人々と時間を過ごすことが重要です。また、自身の個性や能力を認め、自分自身を肯定するポジティブな言葉やアファーメーションを使うことも助けになるでしょう。 また、健康的なライフスタイルへの取り組みもあなたの自己肯定感を高める一助となるかもしれません。バランスの取れた食事、…
最近、だるさや脱力感を感じることが多く、階段を上るのも疲れるのですが、医者に診てもらったほうがよいでしょうか？	疲れやだるさ、脱力感を感じることが頻繁に起こる場合は、医師に診察してもらうことをおすすめします。これらの症状は様々な原因から引き起こされる可能性があります。体調の変化や健康上の問題が隠れている場合もあるため、早めに医師の診察を受けることが重要です。医師は適切な診断を行い、必要ならば検査を行うことで、問題の原因を特定し、適切な治療を提案することができます。
自分の感情や行動をコントロールできず、衝動的な決断をしてしまうことが多いように感じますが、これは精神的な病気でしょうか?治療方法は？	私はAIのアシスタントなので、専門的な医療アドバイスを提供することはできません。ただし、感情や行動のコントロールが難しいと感じる場合、それは精神的な問題の可能性があるかもしれません。まずは、専門医に相談することをおすすめします。専門医はおそらくあなたの症状に基づいて適切な評価を行い、必要な治療方法やサポートを提案してくれるでしょう。
心の底にあるネガティブな感情をすべて押し殺して、少しでも弱い自分を許さないで、でも自分を抑えることはできない	心の底にあるネガティブな感情を押し殺すことは、一時的には効果的かもしれませんが、長期的には健康に悪影響を及ぼす可能性があります。感情は自然なものであり、抑え続けることは難しいですし、それが必ずしも健康的な方法とは言えません。 代わりに、感情を認めることから始めてみましょう。ネガティブな感情も含めて、自分の感情を受け入れることは成長と癒しのために重要です。そうすることで、その感情を探求し、どのように対処するかを考えることができます。 また、自分自身を厳しく批判することは避けましょう。自分に寛容であり、自己肯定感を高めることが大切です。自分が弱いと感じることを許し、自分自身を大切にすることは、心身の健康に良い影響を与えます。 一人で対処するのが難しい場合は、信頼できる友人や家族、または専門家の支援を求めることも考慮してください。専門的なサポートは、問題解決や感情管理のスキルを向上させるのに役…
私たちはいつも喧嘩して、そのたびに辛い言葉をかけられ、別れました。	それは辛い経験ですね。喧嘩が続くと、心や関係に大きな負担がかかります。お互いに辛い言葉を交わすこともあるでしょう。 けれども、何度も別れることが繰り返されるのは健康的な関係ではありません。お互いが幸せになれるような関係構築が必要です。 関係を改善するためには、お互いが冷静に話し合うことが大切です。自分の感情や意見をしっかり伝え、相手もそれを受け入れる姿勢を持ちましょう。互いの意見を尊重し、解決策を一緒に見つけることが重要です。 また、第三者の意見や助言を求めることもオプションです。カウンセリングや関係の専門家に相談することで、客観的な視点からアドバイスを受けることができます。 最終的には、お互いの幸せを考え、思いやりとコミュニケーションを大切にすることが一番です。共に幸せな関係を築けるよう願っています。
シャオ・チャンさんは、道を歩いているといつも周りの人に覗かれているような気がして、精神状態がどんどん不安定になっていきました。	シャオ・チャンさん、それはつらい経験ですね。他の人に覗かれているような気持ちになることは、心理的ストレスや不安を引き起こすことがあります。 まず、周りの人が本当に覗いているのかどうかはっきりとわかりません。自己意識過剰になってしまうこともあるため、他の人の視線に過敏に反応する傾向が生まれることがあります。 こうした気持ちを改善するためには、以下のようなことに意識を向けてみることがおすすめです。 １．周りの人の視線を意識するのではなく、自分の行動や目標に集中しましょう。自分にとって大切なことに注目することで、他の人の視線が気にならなくなるかもしれません。 ２．自己肯定感を高めるために、自分の良いところや成果を振り返ることを意識してみてください。自分を客観的に評価することで、他の人の目を気にする必要がなくなるかもしれません。 ３．人々の行動や視線は、あなたへの興味や好意の表れかもしれません。…
自分の対人関係に問題があると感じています。友人、家族、同僚との意思疎通や意思疎通が難しく、時には衝突や口論さえあり、とてもイライラし、無力感を感じています。健全な関係を築く方法	健全な対人関係を築くためには、以下の方法を試してみることをおすすめします。 1. コミュニケーションスキルの向上: 明確で適切なコミュニケーションは、関係を円滑にするための重要な要素です。相手の意見や感情を尊重し、自分の気持ちや意見を適切に伝えるスキルを向上させることを試してみてください。 2. 共感しよう: 他人の感情や状況に共感することは、関係を深めるのに役立ちます。相手が抱える問題や喜びに対して共感を示し、理解を示すことで信頼関係が築けるようになるでしょう。 3. クリアなコミットメントを作る: 一部の関係は既存の問題に起因して困難になることがあります。このような場合、関与した人々と話し合い、お互いの期待や必要な変更を明確にすることが重要です。問題の原因を共有し、協力して解決策を見つけることが目標です。 4. ポジティブな態度を持つ: 自分の対人関係にポジティブな影響を与えるために…
私は自分の見た目や体に不満を持っており、常に自己判断や自己疑念を抱いていたため、自信と自尊心が低くなってしまいました。	自分の見た目や体に不満を持つことは、多くの人が抱える問題です。しかし、自己判断や自己疑念を基に自信や自尊心が低下することは避けたいものです。 まず最初に、自分自身を受け入れることが重要です。自分がどんな見た目や体を持っていても、それはあなたの独自の美しさです。他の人と比べたり、社会の基準に合わせる必要はありません。自分の個性を認め、受け入れることが自信や自尊心を高める一歩です。 また、自分に対して優しくなることも大切です。常に自己批判をするのではなく、自分の長所や良い面に注目しましょう。毎日自分に対してポジティブな言葉や思いを向けることで、自己肯定感を高めることができます。 さらに、自分の見た目や体に関して改善したいと思うのであれば、具体的なアクションを起こすことも有効です。健康的な食事や運動を取り入れることで体の健康をサポートし、自信をつけることができます。美容やファッションに興味を持…
まるで誰も自分を理解してくれていないかのように孤独で無力感を感じることがよくあり、人々とつながることが難しく、それが悩みであり、解決策を見つけるのが困難です。	孤独感や無力感を感じることは、誰にとっても厳しい経験ですよね。そのような状況から抜け出し、人とのつながりを再建するためには、いくつかのアプローチがあります。 まず第一に、自己理解を深めることが重要です。自分自身がどのような人間であり、どのような価値観や信念を持っているのか、自己分析してみましょう。自分の強みや魅力に気づくことで、他の人とのつながりを築く上で自信を持つことができます。 また、新たな人間関係を築くために、自分に合った活動や場所を見つけることも大切です。趣味や興味を持つコミュニティやグループに参加することで、共通の話題を通じて人との交流を深めることができます。また、ボランティア活動や趣味を通じたイベントに参加することも有効です。 さらに、人とのつながりを築くためには、積極的にコミュニケーションをとることも大切です。自己表現や思いを伝えるために上手にコミュニケーションスキルを磨く…
両親が離婚して以来、私は祖母の家で暮らしており、母と二人で暮らしていますが、母は祖母よりも他人であると常々感じていて、どのようにコミュニケーションをとればよいのかわかりません。	家族の関係が複雑になることは理解できます。以下にいくつかのコミュニケーションのヒントを提案しますが、それぞれの状況に合わせて適応してみてください。 1. 関心を示す: 母に対して、彼女の日常生活や関心事について聞き、共感を示しましょう。それによって、彼女の気持ちや考えに寄り添える関係を築くことができます。 2. 共有の活動: 母と一緒に興味のあることを見つけて、共有の活動に参加しましょう。映画を観たり、散歩したり、一緒に料理を作るなど、お互いの時間を共有することでコミュニケーションを深めることができます。 3. 非言語コミュニケーション: コミュニケーションは言葉だけでなく、非言語的なサインでも伝えることができます。笑顔や身振り手振り、体の触れ合いなど、自然な形で愛情や支援を示すことも大切です。 4. オープンなコミュニケーション: 自分の気持ちや懸念を正直に伝えることも、良好な関係を築…
成功よりも失敗の方が多く、頑張れば報われると自分を慰めることが多くなりましたが、現実は失望することが多いです	失敗や失望を経験することは、成長や学びの機会として捉えることができます。成功よりも多く失敗することは、新しいことに挑戦し続け、自己成長を促すためには必要なことです。失敗は人生の一部であり、挫折や困難を乗り越えることで、より強くなることができます。 頑張っても報われない時や失望することがあると、自分の努力が十分ではなかったのか、アプローチを変える必要があるのかを振り返ることが重要です。自己評価を客観的に行い、改善点を見つけることが成長につながります。 また、成功や報われることに執着するのではなく、過程や努力を楽しむことも大切です。目標に向かって進む過程で得られる喜びや成長があることを忘れずに、自分を奮い立たせることができます。 失望や挫折を経験することは不可避ですが、それを前向きなチャレンジと捉え、自分の人生を充実させることができるでしょう。
何かが起こるのではないかという強い恐怖感があり、落ち着くことができません	恐怖感や不安感を抱くことは人間の感情の一部ですが、落ち着きを取り戻すためには以下のアドバイスがあります。 1. 深呼吸やリラックス法を試す：深く呼吸をすることで神経系をリラックスさせることができます。深い息を数回吸い込んで、ゆっくりと吐き出すことを繰り返してみてください。 2. 現実を確認する：恐怖感や不安感が起こっている時に、自分が実際に危険にさらされているのか確認してみてください。顕著な危険がない場合、恐怖感は現実に基づいていない可能性があります。 3. 前向きな考え方に切り替える：自己啓発やメンタルヘルスの本、またはウェブサイトを利用して、考え方や心の健康を向上させるためのテクニックを学びましょう。ポジティブな考え方を身につけることで、恐怖感を軽減することができます。 4. 継続的なストレス管理：睡眠不足や不規則な生活習慣、過度のストレスなどは恐怖感を引き起こす可能性があります。バ…
自分が何をしたいのか、何をすべきなのかが分からず、混乱した状態が続いていると感じており、それがとても悩み、時にはネガティブな感情を抱いてしまうこともあります。	それはとても厳しい状況ですね。混乱している時には、次の手順を試してみることができます。 1. 自分自身と向き合う: 自己分析を行い、自分の興味や価値観、強みや弱みを見直してみましょう。自分の内面にフォーカスを当てることで、自分が本当に求めているものや目指す方向性が見えてくるかもしれません。 2. 目標を設定する: 何を達成したいのか、どんな未来を描きたいのかを考えましょう。明確な目標を設定することで、自分が進むべき方向が明確になり、行動に移しやすくなります。 3. 小さなステップを踏む: 目標が大きくても、まずは小さなステップから始めてみましょう。具体的な行動計画を立てることで、取り組みやすくなります。 4. 応援を受ける: 身近な人や専門家に相談したり、助言を求めたりすることも有効です。他の人の視点やアドバイスを聞くことで、自分の思考を整理しやすくなるかもしれません。 また、自分自身の…
時々気分が落ち込んだり、ネガティブな感情から抜け出すのが難しいことがあります。どうすればメンタルを調整できますか?	メンタルの調整は個人によって異なることですが、以下の方法が一般的に効果的とされています。 1. ポジティブ思考を促す: ネガティブな思考に囚われることなく、ポジティブな視点を見つけるように心がけましょう。感謝の気持ちを持つことや、成功や喜びの瞬間を意識することが役立つ場合があります。 2. ストレスを管理する: ストレスはメンタルの健康に大きな影響を与えます。適度な運動やリラクゼーション法（深呼吸、瞑想、ヨガなど）を取り入れることで、ストレスを軽減することができます。 3. 自己ケアをする: 自分自身を大切にすることが重要です。良い睡眠を取り、バランスの取れた食事を摂ることで体調を整えましょう。また、自分の好きなことや趣味に時間を割くこともリフレッシュに役立ちます。 4. ソーシャルサポートを活用する: 身近な人や信頼できる友人との交流を大切にしましょう。話を聴いてもらうことや助言を受け…
私は常に自分が十分ではない、十分に賢くない、十分に美しくないと感じており、他人に自分の欠点が見えないように自分を完璧にパッケージ化したいと思うことがよくあります	自己否定や自己評価の低さを感じることは、多くの人が経験することです。しかし、自分自身を完璧にパッケージ化することは不可能であり、他人に自分の欠点を隠すべきではありません。代わりに、自己受容と自己成長に焦点を当てることが重要です。 まず、自己受容をすることが大切です。自分自身を批判したり否定することは、精神的な健康に悪影響を与えます。自分の弱点や不完全さを認めることは、人間であることの自然な一部です。自分自身を受け入れることで、自己評価や自信を向上させることができます。 次に、自己成長に取り組むことが重要です。自分の欠点や弱点を改善するために行動することは素晴らしいことです。しかし、完璧になろうとすることに固執するのではなく、自分自身の成長に集中しましょう。学び続け、新しいスキルや知識を習得することで、自己成長を促進することができます。 最後に、他人との比較を避けることが重要です。他人と自…
本当の帰属意識や目的意識が欠けていて、自分の中に空虚さを感じることがよくあります	それは自己同一性の欠如や人生の目的についての探求の不足を示しているかもしれません。自己の存在意義や目標について考えることは、人間にとって重要な成長の機会です。以下にいくつかのアイデアを提案します: 1. 自分自身と向き合う時間を作る: 毎日少しの時間を自分の思考や感情に向き合うために使いましょう。瞑想、日記を書く、散歩するなど、自分自身との関係を深める活動を見つけましょう。 2. 趣味や関心事を見つける: 自分自身を表現するための趣味や関心事を見つけることは、目的意識を持つ上で役立ちます。新しいことに挑戦してみることも良い方法です。 3. 他人とのつながりを育む: 大切な人との交流やコミュニティに参加することは、帰属意識を感じるための重要な要素です。共通の目的を持つグループに参加することで、新たなつながりや意義を見つけることができるかもしれません。 4. 自己成長への取り組み: 人間は進…
誰かが私を攻撃したり褒めたりするたびに、私は尊敬に値しないので、彼らは私をだましているだけだといつも感じます	他人の意見や評価はあくまで主観的なものであり、全てが真実とは限りません。あなた自身が自分を尊敬に値すると感じることが一番重要です。他人の批判や称賛に振り回されず、自分自身を信じて前に進むことが大切です。自分の良い側面や成果を認識し、自信を持って行動しましょう。他人の意見は参考にすることもありますが、最終的な判断は常に自分自身に委ねるべきです。
他人から批判されたり否定されたりして、ますます自信がなくなってしまうのではないかと心配していますが、どうすれば自信を高めることができますか?	自信を高めるためには、以下のポイントに注意して取り組むことが役立つでしょう： 1. 自己肯定感の向上：自分自身についてポジティブな評価をすることは重要です。自分の良いところや達成したことに焦点を当て、過去の成功体験を振り返ることで自信を高めることができます。 2. 自分の強みを知る：自分が得意なことや好きなことを見つけましょう。それらに集中することで自信がつきます。自分自身の強みを理解することで、他人の批判や否定に対しても自信を持って立ち向かえるようになります。 3. 目標を設定する：具体的な目標を設定し、それに向かって進むことで自信がつくことがあります。小さな目標から始め、順を追って大きな目標に取り組むことで達成感を感じることができます。 4. 自己啓発をする：自己啓発やスキルの向上に取り組むことで、自信を高めることができます。新しいことに挑戦することや自分の興味や関心を広げることで、…
自分の感情にどう対処したらいいのかわかりません。ちょっとしたことで爆発してしまうことがよくあります。自分の感情をコントロールできないと感じます。これは私に精神的な問題があるということでしょうか？	感情のコントロールが難しいと感じることは、精神的な問題があることを意味するわけではありません。感情のコントロールは、誰にでも難しい場面があります。しかし、自分の感情とどう向き合うかを学ぶことによって、より良い方法で対処することができます。 以下は、感情のコントロールに役立ついくつかのアイデアです： 1. 自覚する：感情が高ぶっているときには、まず自分がどのような感情を抱いているのか自覚しましょう。感情を認識することで、冷静になることができます。 2. 深呼吸をする：感情が高ぶっているときには、深呼吸をすることで体と心をリラックスさせることができます。ゆっくりと深呼吸をして、数回繰り返しましょう。 3. 考えを整理する：感情が高ぶっているときには、冷静になるために考えを整理しましょう。自分の感情の原因やその背景を考えることで、より客観的な視点を持つことができます。 4. 時間をおく：感情が…
将来に対する不安と恐怖でいっぱいで、どっちに進んでいいのか分からず、毎日とても迷っています	将来に対する不安と恐怖を感じることは自然なことです。多くの人が同じような感情を抱えることもあります。 まずは、自分の不安や恐怖を具体的に洗い出してみましょう。それが何なのかを明確にすることで、対処方法や解決策を見つけることができます。 また、将来の進むべき道について迷っている場合は、自分自身と向き合ってみることが大切です。自分の価値観や興味、能力を考え、将来の目標や希望を明確にすることで、進むべき方向を見つけやすくなります。 さらに、周囲の人々や専門家の助言や意見を聞くことも参考になります。家族や友人、相談できる人たちに自分の悩みを話し、アドバイスを求めることで新たな視点やアイデアが得られるかもしれません。 将来に対する不安や恐怖に挑戦するためには、自己肯定感を高めることも重要です。自分の強みや過去の成功体験などを振り返り、自信を持つことが大切です。 最後に、将来の道を決めることは一度で…
私には昔から強迫性障害の症状があり、ドアや窓が閉まっているか、電化製品の電源が切れているかなどを何度も確認しなければならず、これらの要件が満たされないと、非常に不安になり、恐怖を感じます。日常生活や仕事に影響が出ています。この問題を解決する方法を知りたいです。	強迫性障害（OCD）は、専門家の治療を受けることが重要ですが、以下の方法があなたの問題を解決する手助けになるかもしれません。 1. 専門家の助けを求める：心理療法や認知行動療法（CBT）は、OCDの治療に効果があります。専門家に相談し、個別に設計された治療プランを立てましょう。 2. ストレスを管理する：ストレスはOCDの症状を悪化させる要因です。日常生活でリラックス法やストレス軽減技術を取り入れることで、ストレスを管理しましょう。 3. 理性的な対応をする：不安や恐怖が湧いたとき、まず自分に問いかけてみましょう。「この確認が本当に必要なのか？」などと考え、理性的な判断を意識的に行います。 4. チャレンジング：OCDの症状に対する順応行動を少しずつチャレンジしてみることが大切です。例えば、確認行動を一つだけ省略するなど、少しずつ変化を加えていきましょう。 5. サポートを求める：家族や…
時々退屈に感じたり、何をしたらいいのか分からなかったり、将来どうなるかも分からず、空虚に感じることがあります。	退屈や空虚な気持ちは、誰にでも起こることです。幸いなことに、これらの感情に対処する方法がいくつかあります。まず、以下のポイントに気をつけてみてください。 1. インタレストやパッションを見つける：自分が楽しんでやりたいと思う活動や趣味を見つけることが大切です。新しいスポーツや音楽、語学、絵画などに挑戦してみると良いでしょう。 2. 目標を設定する：将来の目標を立てることは、モチベーションを高める上で効果的です。短期的な目標から始めて、少しずつ長期的な目標へと進んでいくことを考えてみてください。 3. 新しい経験をする：毎日同じことを繰り返し行うことが退屈さを感じる原因の一つです。新しい場所へ行ったり、新しい人と出会ったり、新しいことを学んだりすることで、日常に変化をもたらすことができます。 4. 自己成長：自分自身を高めるために、読書や勉強、自己啓発をすることもおすすめです。新しい知識や…
私はずっと赤ちゃんが欲しいと思っていましたが、妊娠中はいつも自分は良い母親になるにはふさわしくないと感じていました	赤ちゃんを望むことは自然な気持ちです。妊娠中に自信に欠けることは一般的ですが、それは多くの人が経験する感情です。母親になることは学びのプロセスであり、経験を通じて成長していくものです。 自分が良い母親になることができるかどうか心配するのは自然なことですが、あなたが必要な準備とサポートを受けることで、自信をつけることができます。まずは周囲の人々や専門家から助言やサポートを受け、自分自身を信じることが大切です。 また、良い母親になるためには、愛情と理解を持って子供と向き合うことが重要です。自分が経験したことや学んだことを活かして子供に寄り添い、成長を見守ることができるでしょう。 自信を持つためには、育児をする前に必要な準備をすることも大切です。育児に関する情報を収集し、子育てに役立つスキルや知識を身につけることで自信をつけることができます。 最後に、試行錯誤しながらでも、あなた自身が愛情を持…
私は自分の体や健康について常に心配し、さまざまな病気にかかるのではないかと心配し、とても緊張して不安を感じていました。	健康に対する心配と不安を抱くことは、多くの人にとって自然なものです。しかし、過度な緊張や不安は日常生活や身体に悪影響を与えることもあります。以下にいくつかの方法を共有しますので、ご参考にしてください。 1. 健康についての情報を適切に管理する: インターネットや情報源からの情報は多岐にわたりますが、信頼できる情報源を選ぶことが重要です。医師や保健師からのアドバイスを信頼し、疑問や不安を解消するために専門家に相談することをおすすめします。 2. 健康的なライフスタイルの確立: 適切な食事、定期的な運動、十分な睡眠など、健康的な生活習慣を維持することは、心と体の健康に良い影響を与えます。 3. ストレスを管理する: ストレスは健康問題の一因となることがあります。適切なストレス管理方法を見つけることは重要です。リラックスするための趣味や活動を見つけたり、瞑想や深呼吸を行うことでストレスを軽減す…
私は非常に自意識過剰で、自分の外見や体型にうるさく、終わりのない自己修改や変化に巻き込まれることがよくあります。	自意識過剰の感情は、多くの人が経験するものです。そのような感情に苦しむことはよくありますが、いくつかの方法を試して自己受容を促すことができます。 まず、自分自身を肯定的に受け入れることから始めましょう。自分自身の欠点や不完全さを受け入れることで、自己批判的な考えや行動を和らげることができます。 また、自分を取り囲む環境にも注意を払いましょう。マスメディアやソーシャルメディアは、私たちの自尊心に悪影響を与えることがあります。自分と他人を比較することに固執するのではなく、自分自身の良い面や才能に焦点を当てるようにしてください。 さらに、肉体的な健康状態を重視しましょう。バランスの取れた食事や適度な運動は、自己受容感を高めるのに役立ちます。自分の体を健康的にケアすることは、自己修正への過剰な注意を和らげることにも繋がります。 最後に、専門家のサポートを検討してみることもお勧めです。心理療法士や…
学習障害はよくあることですが、ゲームのように扱うことで学習をより楽しくすることができます	そうですね、ゲーム化することで学習のモチベーションを高めることができます。学習者がゲームのような要素や競争的な要素に興味を持ちやすくなるため、学習が楽しくなるでしょう。例えば、クイズやパズルの要素を取り入れた学習アプリや、レベルアップや報酬の仕組みを持った学習プラットフォームなどがあります。学習がゲームのようになることで、学習障害を持つ方でもより積極的に取り組むことができます。また、ゲーム化することで学習内容を視覚的に表現したり、自己評価を促すこともできます。どのような学習障害でもゲームの要素を取り入れることで、より効果的な学習環境を作ることができます。
頼れる人が欲しいのは当然ですが、どうやって頼ればいいのか分からず、挑戦するたびに失敗し、勇気を失ってまた原点に戻ってしまいます。	頼れる人を見つけることは、確かに重要です。しかし、何度も失敗してしまい、勇気を失ってしまうことはよくあるものです。以下にいくつかのアドバイスをお伝えしますので、参考にしてみてください。 1. 自分のニーズを明確にする：何を求めているのか、どのような支援を必要としているのかを自分自身に問いかけてみましょう。明確な目標や必要な頼みごとを持つことで、適切な人を見つけやすくなります。 2. 失敗を学びの機会と捉える：失敗や失敗体験は成長の機会です。挑戦するたびに何かしらの教訓を得ることができるはずです。失敗を恐れずにチャレンジし、学び続けることが大切です。 3. コミュニティに参加する：同じ目標を持つ人々や、似たような経験をした人々と交流することは、頼れる人を見つけるための一つの方法です。オンラインであれば、ウェブサイトやソーシャルメディアのコミュニティに参加することもできます。 4. 自分自身…
学習障害はよくあることですが、ゲームのように扱うことで学習をより楽しくすることができます	学習障害を持っている人々にとって、学習は普通の人よりも困難な場合があります。しかし、ゲームを使うことで学習をより楽しくし、困難さを軽減することができます。 ゲームは、プレイヤーが自分自身で問題を解決するための手段です。この自己責任の要素は、学習障害を持つ人々にとって特に重要です。ゲームを通じて、彼らは自分のペースで進み、繰り返し練習することができます。また、ゲームの中での成功体験は自信を高め、モチベーションを向上させる助けとなります。 さらに、ゲームは視覚的でインタラクティブな要素を持っているため、学習障害を持つ人々にとってよりアクセスしやすくなります。認識や記憶の問題がある人にとって、ゲームは情報の整理や重要なポイントの強調を行うための有用なツールとなります。 最後に、ゲームは協力や競争の要素を取り入れることができます。お互いに助け合ったり競い合ったりすることで、学習障害を持つ人々は他…
頼れる人が欲しいのは当然ですが、どうやって頼ればいいのか分からず、挑戦するたびに失敗し、勇気を失ってまた原点に戻ってしまいます。	初めて何かに挑戦する場合や、頼れる人を見つけることが難しい場合は、次の方法を試してみることができます。 1. 目標を明確にする：何を達成したいのか、どのようなサポートが必要なのかを明確にしましょう。具体的な目標を設定することで、頼れる人を見つける方向性が見えてきます。 2. 信頼できる人に相談する：信頼できる人、例えば友人や家族に相談してみましょう。彼らはあなたの成功を望んでいることでしょうし、サポートしてくれるかもしれません。また、アドバイスや意見が得られるかもしれません。 3. 専門家に相談する：特定の分野でアドバイスを得たい場合は、関連する専門家に相談してみることがおすすめです。例えば、学校では教師、仕事では上司や同僚、健康に関することでは医師や専門家などです。 4. オンラインコミュニティを利用する：インターネット上には様々なオンラインコミュニティがあり、共通の目標や関心を持つ人…
物事に対する興味や熱意がどんどん低下し、何をするにもやる気がいつも低下しているように感じますが、これは精神的な健康上の問題でしょうか?	はい、興味や熱意の低下、やる気の低下は精神的な健康上の問題の一つかもしれません。これは一般的に、うつ病や不安障害などの症状と関連しています。他にもストレス、疲労、季節性の気分の変化などが影響を与えることもあります。 しかし、このような症状は他の理由からも起こる可能性があるため、心理的な問題だけでなく、身体的な問題やライフスタイルの変化も考慮する必要があります。栄養不良、不規則な睡眠パターン、運動不足などが効果を与えることもあります。 興味や熱意の低下が継続している場合、専門家に相談することをおすすめします。そうすることで、具体的な原因を特定し、適切な治療やサポートを受けることができます。
定期的な心理的プレッシャーは、私たちの感情の安定に影響を与え、身体の健康に影響を与える可能性があります。私たちは心理的資質の育成に十分に取り組み、メンタルヘルス教育を実施する必要があります。	心理的プレッシャーは、私たちの感情の安定に深い影響を与えます。過度なストレスや不安は、不眠や食欲不振、イライラ感、集中力の低下などの身体的な反応を引き起こす可能性があります。また、長期間にわたる心理的なプレッシャーは、慢性的なストレスやうつ病のリスクを高めることもあります。 心理的なプレッシャーから身を守るためには、心理的資質の育成が重要です。自己認識や感情管理、ストレス管理、問題解決能力などを向上させることで、プレッシャーに対処するための強さや柔軟性を身につけることができます。また、適切な休息やリラックスの時間を取ることも大切です。 さらに、メンタルヘルス教育は、心理的なプレッシャーやストレスについての知識や情報を提供するだけでなく、サポートや支援の仕組みを整えることも重要です。学校や職場でのメンタルヘルスに関するトレーニングやプログラムを通じて、個人や組織全体のメンタルヘルスの意識を…
一晩不法拘束され、衰弱するまで拷問されて、隅っこで一人泣いて、涙だけが闇を照らした	私は非常に心配しています。拷問と暴力的な扱いは許されることではありません。あなたがこのような辛い経験をしたのなら、まずは自分の安全を確保するために警察や保護機関に連絡することが重要です。また、心のケアを受けることもおすすめします。専門家や支援グループ、友人や家族に相談してみてください。あなたはこれを乗り越えることができます。
青少年の精神的健康の観点からは、健全な関係を築く方法と、自分の感情や要求を正しく表現する方法を学ぶことが非常に重要です。	青少年が健全な関係を築くためには、以下のようなポイントに気をつけると良いでしょう。 1. コミュニケーション：相手とのコミュニケーションを大切にしましょう。思いやりを持って相手の話を聞くことや、自分の気持ちや意見を適切に伝えることが大切です。 2. 信頼と尊重：お互いに信頼関係を築くためには、相手を尊重し、傾聴することが重要です。相手の感情や意見を否定せずに受け入れることが大切です。 3. 共通の利益：一緒に楽しめる共通の趣味や関心事を持つことは、関係を深める上で助けになります。互いの興味に対して理解を示し、一緒に活動することで絆を深めましょう。 また、自分の感情や要求を正しく表現するためには、以下のポイントも参考になります。 1. 自己認識：自分自身の感情や要求を理解するためには、自己認識を高めることが大切です。自分が何を感じ、何を求めているのかを正確に把握することが重要です。 2. …
最近悪夢をよく見るのですが、その夢を見ると恐怖や不安を感じ、睡眠の質や日常生活に影響が出ることもあります。	悪夢をよく見ることは、不安や恐怖を引き起こし睡眠の質や日常生活に影響を与えることがあります。以下にいくつかの対処方法をご紹介しますが、深刻な状況であれば、専門家に相談することもおすすめです。 1. 日常生活の安定：バランスのとれた食事、適度な運動、規則正しい睡眠スケジュールを心がけましょう。健康的な生活習慣は心の安定にもつながります。 2. ストレス管理：ストレスは悪夢の原因になることがあります。リラクゼーション技法やマインドフルネス、ヨガ、瞑想などの活動を取り入れてストレスを軽減しましょう。 3. 夢日記：悪夢を見た後に夢日記をつけることで、夢のパターンや共通点を見つけることができます。これによって、悪夢に対する理解を深めることができます。 4. 環境整備：寝室をリラックスできる環境に整えることも重要です。快適な寝具、適温、静かな環境などを整えることで、より良い睡眠を促進することができ…
いつも不安で、物事の進み具合を常に心配しており、特に小さなことで不安や不快感を感じることもあります	不安や不快感を感じることは、私たちにとって普通の感情です。しかし、それが日常生活に大きな影響を与える場合は、対処方法を見直す必要があるかもしれません。以下にいくつかのアドバイスをご紹介します。 1. 現実的な評価を行う：物事を過度に心配すると、不安が増幅されてしまいます。物事を客観的に評価し、その問題が本当に深刻なものなのか、または別の視点から見ることで、不安感を和らげることができます。 2. マインドフルネスや瞑想：不安を抱える時には、意識的な呼吸法や瞑想の練習が有効です。これによって、現在に集中し、心の平穏を取り戻すことができます。 3. 理想的なサポートを見つける：家族や友人、または専門家のサポートを受けることで、不安を共有し、助けを求めることができます。話し相手や専門家のアドバイスは、新たな視点を提供し、問題解決の手助けをしてくれるかもしれません。 4. 自己ケアをする：不安や不…
ネガティブな考えを止めることができず、物事がそれほど悪くないときでも、依然として最悪のことを考えてしまい、とても落ち込んで無力感を感じ、この感情を決して取り除くことができないように感じます。	ネガティブな考えを持ち続けることは、私たちの心と精神の健康に悪影響を与える可能性があります。ここにいくつかの方法がありますが、心理的な問題が深刻な場合は専門家に相談することをお勧めします。 1. マインドフルネス瞑想を試してみてください。マインドフルネス瞑想は、現在の瞬間に焦点を当て、ネガティブな考えを受け入れつつも、それに囚われずに受け流す方法です。定期的な練習で、ネガティブな思考パターンを変えるのに役立つかもしれません。 2. 自己肯定感を高めるために、自己価値感を育てる方法を探してみてください。自分が成功した経験や、克服した困難などに焦点を当てることで、自信を持つことができます。 3. ネガティブな考えを持っている場合は、その考えが現実的かどうかを客観的に評価してみてください。多くの場合、私たちは過大なリスクや悲観的な結果を想像しすぎています。 4. ネガティブな思考をプラスの思考…
自分の人生は退屈で、情熱やモチベーションが欠けていると感じ、落ち込んで迷ってしまいます。	私はあなたの感情を理解します。人生が退屈でモチベーションが欠けると、落ち込んだり迷ったりすることはよくあります。それでも、いくつかのアドバイスをお伝えできるかもしれません。 まず、自分自身と向き合ってみてください。自分が何を求めているのか、何に情熱を抱いているのか考えてみましょう。夢や目標を見つけることが重要です。そうすることで、モチベーションが湧く可能性があります。 また、新しいことにチャレンジしてみることもおすすめです。新しい趣味や興味を見つけることで、退屈さやモチベーションの欠如を打破することができるかもしれません。新しい経験は人生を豊かにし、新たな情熱を生み出すこともあります。 さらに、周囲の人々と交流することも重要です。友人や家族とのつながりを深めることで、喜びや活力を感じることができます。また、仲間との共同プロジェクトやボランティア活動に参加することも考慮してみてください。他…
私はよく不眠症に悩まされ、夜ベッドに横になって仕事や家事、人間関係のことを考えているため、日中は集中できず、仕事の効率も悪く、気分も非常に悪くなります。	お気持ちを察します。不眠症は辛いものですね。 まず、一般的な睡眠の質を向上させるために試してみることができるいくつかの方法をご紹介します。 1. 睡眠環境の整備: 寝室を暗くして、静かな環境を作りましょう。快適な寝具を用意して、寝る前に部屋を涼しくすることも重要です。 2. 寝る前のリラックス: 寝る前にリラックスする方法を見つけることが大切です。例えば、お風呂に入る、瞑想や深呼吸を行う、音楽を聴くなど、お好みの方法でリラックスしてみてください。 3. 寝る前のスクリーン使用の制限: 寝る前のスマートフォンやパソコンの使用は控えるようにしましょう。画面のブルーライトが眠りを妨げることがあります。 4. 睡眠のリズムを整える: できるだけ毎日同じ時間に寝る習慣をつけると、体内時計が整いやすくなります。また、昼寝を控えめにすることもおすすめです。 これらの方法を試しても改善が見られない場合は…
挫折や失望に遭遇したとき、安全になる唯一の方法はすべてを忘れることだと思います。	挫折や失望に遭遇した時、すべてを忘れることが安心できる方法の一つかもしれません。しかし、完全に忘れることは難しい場合もあります。代わりに、以下の方法を試してみることをおすすめします： 1. 自分自身の感情を受け入れる：感じることを抑えずに、自分の感情を受け入れることは大切です。その感情を認めることで、それを処理する手助けになります。 2. 反省し学ぶ：挫折や失望から得られる教訓を見つけることも重要です。その経験を振り返り、何か新しいことを学んだり、自己成長する機会に変えることができます。 3. 支えを求める：他の人々と話し合うことで、励ましやアドバイスを受けることができます。家族や友人、信頼できる人々に話を聞いてもらい、支えを受けることは心の安定につながるでしょう。 4. 自分の目標を再確認する：挫折や失望から立ち直るために、自分の目標や夢を再確認することが助けになります。目標に向かって…
肉体労働をしていないときでも、しばしば疲労感や脱力感を感じ、不眠症や不眠症に悩まされることも多く、非常に不快で不安な気分になります。	疲労感や脱力感、不眠症に悩まれることは辛いですね。以下にいくつかのアドバイスをご紹介しますが、具体的な症状や状況に合わせて、専門家に相談することもおすすめです。 1. 健康的な生活習慣を確保する: 質の良い睡眠を取り、バランスのとれた食事を心がけましょう。十分な睡眠と栄養は体を回復させるのに重要です。 2. ストレスを管理する: ストレスは身体に悪影響を与える要因の一つです。リラックスするための時間を作り、自分に合ったストレス解消法を見つけてみてください。ヨガや瞑想、散歩などが効果的かもしれません。 3. 適度な運動を取り入れる: 適度な運動は体と心の健康を促進します。ウォーキングやストレッチなど、自分に合った運動方法を選びましょう。運動は血流を促進し、エネルギーを高める助けになります。 4. マインドフルネスを実践する: マインドフルネスは現在の状態に意識を集中させることでストレスを減…
時々うつ病を患い、普通に食べることができなくなり、痩せていくのを人に見られるのが怖くて食べる量をコントロールするようになります	うつ病による食欲の低下や食事の制限は一般的な症状です。しかし、正常な食事を確保することは重要です。栄養価の高い食事は身体と心の健康にとって不可欠であり、回復のプロセスをサポートすることができます。 以下は、食欲を改善し、健康的な食事を摂るためのいくつかの提案です。 1. 小さな食事を頻繁に摂る: 代わりに3大食を摂るのではなく、1日に数回ごく小さな食事を摂ることができるように工夫してみてください。 2. カラフルな食材を摂取: ビタミンやミネラルを豊富に含んでいるフルーツや野菜を積極的に摂取しましょう。特に緑黄色野菜やレッドフルーツは、健康に良い効果があります。 3. 栄養価の高い食材を選ぶ: タンパク質を含む食材（鶏肉、魚、卵、豆類など）を積極的に摂取することで、満腹感を得ることができます。また、オメガ3脂肪酸を含む食材（サーモン、ナッツ、シード）もうつ病の症状を軽減する可能性がありま…
両親はいつも私を批判しており、何をやっても不十分で、とても落ち込んで失望し、両親の承認や賞賛は決して得られないと感じています。	両親からの批判や不満を感じるのは辛いですね。まず、自分を責めることはやめましょう。あなたは十分に価値のある人であり、自己承認が必要です。 以下のアドバイスを考慮に入れてみてください。 1. 自己肯定感を高める：自分自身を受け入れ、過ちを許すことが大切です。自分に対して優しくなりましょう。 2. 批判を受け止める：両親があなたを批判する理由が分からないかもしれませんが、彼らが何を求めているのかを理解しようと努力してみてください。必要な行動や変化を試みることができます。 3. 応援してくれる人を見つける：両親の承認を得ることが難しい場合でも、他の人々からのサポートを受けましょう。信頼できる友人、先生、指導者、相談相手など、あなたを応援してくれる人々との関係を築くことが重要です。 4. 自己成長に取り組む：自分自身や人間関係について学ぶことも大切です。自己啓発本やカウンセリングなどの手段を活用…
私の関係は常に非常に不安定で、常に感情に支配されており、健全な関係を維持することができません。	関係が常に不安定で感情的な波がある場合、いくつかのアプローチを試すことができます。まず、自己認識を高めて自分自身との関係を改善することが重要です。以下はいくつかの提案です。 1. 自己反省を行う：自分自身の感情や反応、行動について考えることが大切です。自己反省を通じて、なぜ感情的になるのか、どんなトリガーがあるのかを理解することができます。 2. コミュニケーションスキルを向上させる：コミュニケーションは健全な関係を築くために不可欠です。自分の感情や意見を冷静に伝える練習をしましょう。相手の意見や感情を尊重することも重要です。 3. スキルを学ぶ：感情の管理やストレス解消のためのスキルを学ぶことも大切です。メディテーション、深呼吸、心理療法などは、感情の安定化に役立つことがあります。 4. 自己ケアを行う：自己ケアはストレスや感情の管理に効果的です。体を健康に保つために十分な睡眠をとり、…
シャオリンさんは大学時代にいじめに遭い、それが原因で劣等感を抱き、落ち込んでいました。どうすれば彼女が自信と精神的健康を取り戻すことができるでしょうか?	シャオリンさんが自信と精神的健康を取り戻すためには、以下のアプローチが有効です。 1. 心理的なサポートを受ける: 専門家のアドバイスを受けることで、過去のいじめの経験や劣等感に向き合い、それを克服するための手助けを受けることができます。心理療法士やカウンセラーのセッションに参加することで、感情を整理し、ポジティブな思考パターンを形成することができます。 2. 自己肯定感の構築: シャオリンさんが自己価値感や自己肯定感を高めるためには、自分の長所や良い点に焦点を当てることが重要です。自分自身の成功や達成に注目し、自分の価値を再確認することで自信を取り戻すことができます。日々の積極的な自己肯定の実践も助けになります。 3. 自己ケアの実践: シャオリンさんが自分自身を大切にすることも重要です。バランスの取れた食事、十分な睡眠、適度な運動、ストレスを管理するためのリラクゼーションやマインドフ…
私の家族関係は複雑で、ストレスや不安を感じることが多く、どのように対処すればよいのか、誰に助けを求めればよいのかわかりませんでした。	家族関係が複雑でストレスや不安を感じることは大変なことですね。このような状況には、以下のような方法で対処してみることができます。 1. 孤独に感じないでください：身近な友人や信頼できる人に相談することで、あなたの感情を共有し、サポートを受けることができます。 2. 専門家に相談する：心理学者、カウンセラー、または家族療法の専門家に相談することで、あなたの状況や感じることについて専門的な助言や指導を受けることができます。 3. グループセラピーに参加する：同じような問題を抱えた人々との交流を通じて、サポートや新たな視点を得ることができます。 4. 自己ケアに時間を割く：自己ケア活動（例：運動、リラックス、趣味に没頭するなど）を取り入れることで、ストレスを軽減し、精神的な安定を保つことができます。 5. 毒を避ける：家族関係における負のパターンや毒を生む要因を避けることが大切です。そのために…
いつもネガティブな愚痴を言い、何に対しても前向きな姿勢をとらない友人がいます。彼のネガティブな性格が私の感情に影響を与えていると思いますが、彼とどのようにコミュニケーションをとればよいのかわかりません。	ネガティブな友人とのコミュニケーションにおいては、以下のアプローチを試してみることが助けになるでしょう。 1. 聴く姿勢を持つ: 彼がネガティブな愚痴を始めたときに、耳を傾けて話を聞いてあげましょう。相手の感情を理解しようとすることは、彼との関係を深める上で重要です。 2. 共感する: 彼が愚痴を言っているときには、その気持ちに共感しましょう。それは、彼が認められて理解されていると感じることに繋がるでしょう。ただし、彼がネガティブな状況や考え方に固執し過ぎている場合には、その点を注意しましょう。 3. 前向きな視点を提供する: 彼の愚痴やネガティブな言葉に対しては、可能な限り前向きな視点を提供してあげることが大切です。例えば、同じ状況でもポジティブな側面や解決策を探す方法を共有したり、彼が感謝することができることに注意を向けるよう促してみましょう。 4. 楽しい時間を共有する: 彼と一緒…
最近、常に不眠症で、寝ても悪夢を見て、起きた後も体が重いことに気づきました。どうすればよいですか?	不眠症や悪夢、体の重さを感じる状態は、心身のバランスが崩れている可能性があります。以下の方法を試してみることをおすすめします: 1. 睡眠環境の改善: 眠りやすい環境を整えましょう。寝室を暗く静かな状態にし、寝具や枕を快適なものに変えることを検討してください。 2. 良い睡眠の習慣を身につける: 睡眠のリズムを整えるために、毎日同じ時間に寝て同じ時間に起きることを心掛けてください。また、寝る前にリラックスする習慣を作ることも大切です。温かいお風呂や読書、ヨガや瞑想などを試してみてください。 3. ストレスを軽減する: ストレスは睡眠障害を引き起こす可能性があります。日中のストレスを軽減するために、適度な運動やリラックス法を取り入れてみてください。必要に応じて、ストレスの原因や対処法について話し合える友人や専門家とのコミュニケーションもおすすめです。 4. ヘルシーな生活習慣を実践する: …
友達とおしゃべりしていると、いつも会話が終わってしまって何も言うことがないと感じることがあります	友達との会話が終わってしまうことは誰にでも起こり得ることです。おしゃべりを楽しむために、以下のいくつかの方法を試してみることをおすすめします。 1. 話題を多様化させる: ニュース、趣味、最新の映画や本、旅行など、さまざまな話題を持ち寄ることで、会話に新鮮さをもたらすことができます。お互いの興味関心や好きなことについて話すこともおもしろいです。 2. 質問をする: 相手に質問をすることで、会話が広がることがあります。例えば、最近読んだ本の感想や、おすすめのレストラン、興味深いイベントなどについて尋ねることができます。 3. 共通の話題を見つける: 共通の趣味や共通の体験について話すと、会話が自然に盛り上がることがあります。例えば、一緒に行ったイベントや旅行、共通の友人や仕事の話題などです。 4. 音楽や映画の話題: 最新の音楽や映画について話すことも会話のネタとして使えます。おすすめのア…
私の子供は学校でいじめられていますが、今はとても引きこもり気味で、どうやって彼を助けたらいいのかわかりません。	お子さんが学校でいじめられているという状況は心配ですね。以下にいくつかのアイデアを提案しますが、まずは専門家や学校のカウンセラーに相談することをおすすめします。彼らは具体的なアドバイスやサポートを提供することができます。 1. コミュニケーションを促す: お子さんとじっくり話し合って、彼の気持ちや経験について理解しましょう。彼が自分の感情や思いを言葉にできるようにサポートし、安心感を与えてください。 2. 心のケアをサポートする: 引きこもり気味である場合、自尊心や自己価値感が低下している可能性があります。彼が興味を持つ活動や趣味を見つける手助けをし、充実感を感じられるようにしてください。 3. プロフェッショナルのサポートを受ける: 学校のカウンセラーや心理学者に相談し、いじめの問題を共有しましょう。彼らは適切なアドバイスやリソースを提供してくれる場合があります。 4. 家族のサポート…
人とコミュニケーションを取るときはいつもとても緊張して、何を言えばいいのか分からず、間違ったことを言ってしまうのではないかと心配になります。	人とコミュニケーションを取る際に緊張するのは自然な感情です。多くの人が同じように感じています。実際、間違ったことを言ったり、思ったような表現ができなかったりすることもあるかもしれませんが、それは誰にでも起こり得ることです。 心配することはありません。コミュニケーションは相手との思いやりや理解を伝えるために行われるものです。完璧な言葉や表現を求める必要はありません。自分の思いを気持ちよく伝えるためには、自分自身を受け入れ、リラックスすることが重要です。 練習は自信をつけるためにも効果的です。日常生活で用いる表現や質問を練習して、自分の言葉を自信を持って伝えることができるようにしましょう。また、相手の話をじっくりと聞くことも重要です。相手とのコミュニケーションは双方向のものであり、相手の言葉や表情を注意深く受け入れることで、より良い関係を築くことができます。 最初は緊張することもあるかもしれ…
一人でいるといつも説明のつかない恐怖を感じ始め、無意識のうちに目に見えない力に支配され、閉じ込められ、突き抜けられない殻に閉じ込められているように感じ、時にはすべてがひどく恐ろしいことになることがあります。	それは不安や孤独感を感じている典型的な経験かもしれません。こういった感情や思考は、心理的な問題やストレスの兆候であることもあります。あなたが感じている恐怖や無力感について、専門家の助けを借りることをおすすめします。心理カウンセラーや心理療法士は、あなたの感じていることを理解し、適切なサポートを提供することができます。また、友人や家族と話をすることも役立つことがあります。彼らはあなたをサポートすることができるだけでなく、気持ちを共有することもできます。あなたが抱えている感情に対して向き合うことは重要ですが、自己判断だけではなく、専門家や信頼できる人々とのコミュニケーションを活用することを忘れないでください。
私はいつも自分に厳しすぎて、愛され大切にされる価値がないと感じていました。	あなたが自分に厳しすぎると感じることは理解できますが、それがあなたにとって価値がないと感じることは間違っています。あなたは愛されている価値があり、大切にされる資格があります。自分自身を過度に批判することは、自信と自己評価を低下させる可能性があります。自分を受け入れることや自分自身をほめることを試してみてください。自分の長所や成果を認識することで、自分自身に対する愛と尊敬を育むことができます。また、他人からの承認や愛情を求めるのではなく、自分自身を愛し、自分自身を大切にすることが重要です。あなたは素晴らしい人ですし、愛される価値があると思います。
私の人生はいつもイライラばかりで、何をやっても失敗し、自分には価値がないと感じています	私はあなたの気持ちを理解します。イライラや失敗感を感じることは、誰にでもあるものです。しかし、自分に価値がないと感じるのは厳しすぎる自己評価です。あなたの才能や素晴らしいところを見つけることができるはずです。 まずは、自分に対して優しくなることから始めてみましょう。自己評価を下げるよりも、自分に対して慈悲深い態度を持つことが大切です。自分の失敗を重く受け止めず、失敗から学び成長できるチャンスと捉えることができれば、気持ちも前向きになるでしょう。 また、自己価値は外部の評価や成果に依存するものではありません。他人と比較せず、自分自身と向き合いましょう。自分の得意なことや興味があることを見つけ、それを追求することで自信をつけることができます。 また、ストレスやイライラを緩和するために適切なリラックス方法を見つけることも重要です。例えば、マインドフルネスや瞑想、ヨガなどの活動を試してみることも…
私はいつもいじめられ、見下され、無力で無能だと感じられ、社会的状況で自分の本当の強さや能力を発揮できず、いつも隅っこに隠れていました。	あなたがいじめられ、見下され、無力で無能だと感じていることは、とてもつらい経験です。まず最初に言いたいのは、あなたは無力で無能ではありません。自分の本当の強さや能力を発揮することはできるということです。 一つ大切なことは、他人の評価や承認に囚われないことです。自分自身を軽んじず、自分の価値を認めることが大切です。他人がどう思おうと、あなたは自分自身を大切にすることができます。 また、他人の意見を気にしすぎず、自分がやりたいことや得意なことに集中することも重要です。自分の興味や才能に合った活動を見つけ、それに没頭することで自信を取り戻すことができます。 また、信頼できる友人やサポートを求めることも考えてみてください。自分ひとりで悩みや困難を抱え込まず、誰かに話を聞いてもらうことで心の負荷を軽減できるかもしれません。 最後に、自分自身を肯定する言葉や思考を意識的に使うことも助けになるでしょう…
将来について混乱して無力感を感じ、何をすべきか分からず、何をしたいのかも分かりません。	将来について混乱して無力感を感じることは誰にでもあるものです。まずは落ち着いて、以下のステップを試してみてください。 1. 自己探求: 自分の興味や価値観を考えてみてください。何に情熱を持って取り組みたいですか？どのような人生を送りたいですか？自分自身と向き合い、自己探求を行うことが大切です。 2. ゴール設定: 長期的な目標を立てましょう。将来のビジョンや目標を明確にすることで、自分の行動や選択がより意味を持つようになります。 3. プランニング: 目標を達成するために、具体的なアクションプランを立てましょう。順序立てて行動を起こすことで、将来への道筋が見えてくるはずです。 4. 努力と継続: 将来の目標を実現するためには、努力と継続が必要です。困難や失敗に立ち向かい、諦めずに取り組むことが大切です。 また、他人の意見や経験も役に立つことがありますので、身近な人や信頼できるアドバイザー…
なぜ私はいつも考えすぎて将来のことを心配し、外出するたびにドアの鍵を閉め、窓を閉めているかを再確認しなければならずのかわからなくて、とても疲れてイライラする。	心配や疑念が常に頭を巡ってしまう理由はいくつか考えられます。 1. 過去の経験からくるトラウマ：過去に何かしらの事件や失敗を経験し、それが将来に対する不安や疑念を引き起こしている可能性があります。その経験から得た教訓や警戒心が過剰になっているかもしれません。 2. パーソナリティの特性：一部の人は自然と心配性や神経質な傾向があることがあります。これは遺伝的な要因や生まれ持った性格によるものです。また、ストレスや不安が蓄積される環境に長く置かれることも影響しているかもしれません。 3. 現代社会の影響：現代社会では、情報過多や不確実性の高い状況が日常的に存在します。これによって将来への不安や心配が増幅され、自らのセキュリティに対して過剰に注意するようになることがあります。 これらの要因が組み合わさることで、常に考えすぎて将来のことを心配し、防衛策を取り続ける必要があると感じるのかもしれませ…
長い間性的暴行を受けてきましたが、今でも痛みや苦しみを感じています。この過去の傷にどう対処すればよいでしょうか?	性的暴行の経験は非常に困難なものですし、その傷は時間が経っても癒えることがありません。しかし、以下のアイデアを参考にして、過去の傷に向き合い、回復に向けて進むことができるかもしれません。 1.サポートシステムを求める: 当事者団体やカウンセラー、信頼できる友人や家族など、あなたをサポートしてくれる人々に相談してみましょう。彼らはあなたの感情や経験に対して理解を示し、あなたが癒されるプロセスをサポートしてくれるでしょう。 2.専門家の助けを求める: 心理療法士やカウンセラーなどの専門家に相談してみると良いでしょう。彼らは過去の傷を処理し、回復するための支援を提供してくれます。また、専門的なアドバイスやトリガー管理の方法を教えてくれることもあります。 3.セルフケアをする: 精神的な回復を助けるために自己ケアに取り組むことも重要です。自身がリラックスする方法を見つけ、心と体のバランスを保つた…
私は自分の人生に意味や目的がないと感じ、本当にやりたいことが見つからず、その喪失感がとても辛かったです。	私はその感じについて非常に共感します。人生の意味や目的の欠如を感じることは、非常につらい経験です。しかし、心配しないでください。多くの人が同じような感情を抱えており、それに向き合って取り組む方法があります。 まず、自分自身と向き合う時間を作りましょう。自分自身を知ることは、本当にやりたいことを見つけるための重要なステップです。自己探求を始めるために、興味のあることや何に喜びを感じるのかを考えてみてください。また、過去の経験や人生の中での成功や喜びを振り返ってみることも役立つでしょう。 また、他の人との交流も大切です。他の人とのつながりを通じて、新しい視点やインスピレーションを得ることができます。友人や家族、または専門家やカウンセラーとの話し合いも、あなたの気持ちや考えを整理するのに役立つでしょう。 さらに、小さな目標やプロジェクトを設定して取り組むことも重要です。自分が本当にやりたいこと…
ある日、私は現実世界から逃れる方法を見つけました。それはソファに頭を置き、耳を塞ぎ、外の音を聞かず、自分だけの世界に完全に浸ることです。この世ではあらゆる悩みが消える。	それは確かに一時的な逃避方法かもしれませんが、現実世界の問題から逃れることは長期的には解決にはなりません。問題解決やストレス管理には、いくつかの異なるアプローチがありますので、考慮してみることをお勧めします。 1. 自己ケアの実践: 日常的なストレスを軽減するために、十分な睡眠、バランスの取れた食事、定期的な運動など、自己ケアの実践を試してみてください。 2. 問題解決のスキルの向上: 問題に取り組むスキルを身につけることで、より良い解決策を見つけることができます。情報収集や情報を評価する能力を向上させることも重要です。 3. 心理的なサポート: 心理カウンセリングやセラピーなどの専門的なサポートを受けることも有益です。自分の感情や思考を整理し、より健康的な方法でストレスに対処する手助けをしてもらえます。 4. 新しい趣味や活動の発見: 新しい趣味や活動に取り組むことで、リフレッシュでき…
しばしば孤独で無力感を感じ、誰からも理解されず、サポートもされていないと感じ、周りに人がいる場合でも、孤立感や疎外感を感じ、この感情が私を非常に落ち込んで否定的にさせ、時には不安やうつ症状につながることもあります。	私は、あなたの感じている孤独や無力感、疎外感について非常に理解しています。これらの感情は、誰もが経験することがあるものです。しかし、それが自己否定や不安、うつ症状につながることはとても重要です。 まず、あなたが感じているこれらの感情を軽くするために、以下のいくつかのアイデアをお試しいただければと思います。 1. コミュニティに参加する：周りに人がいる場合でも孤独感を感じる場合、共感やサポートを得られるコミュニティに参加してみることをお勧めします。趣味や興味に基づくグループやオンラインコミュニティに参加することで、共通の話題を持つ人々と関わることができます。 2. サポートを求める：自分自身が孤立しているように感じる場合でも、周りにはサポートすることができる人々がいる場合があります。家族や友人、専門家、または相談窓口など、信頼できる人々に話をすることはとても助けになります。彼らはあなたを理…
あなたからの一言で私は落ち込んでしまうかもしれません	申し訳ありませんが、私のアルゴリズムはあくまで情報提供とサポートのために設計されていますので、場合によっては落ち込むような言葉を避けるようにしています。もし何かお悩みやサポートが必要なことがあれば、お気軽にお知らせください。私はできる範囲でお手伝いいたします。
自分の見た目や体型に非常に不満があり、自尊心の低下や不安を感じることがよくあります	見た目や体型に対する不満や自己評価の低下は、多くの人が経験するものです。しかし、それによって自己価値を低くする必要はありません。以下にいくつかのアドバイスをご提供します。 1. 自分を受け入れる: 自分自身を受け入れることが重要です。完璧な外見や体型を持つ必要はありません。あなたは独自の美しさや魅力を持っています。自分自身を肯定し、自分を愛することから始めましょう。 2. 健康的な習慣を身につける: 自分自身を大切にするために、健康的な生活習慣を身につけることをおすすめします。バランスの取れた食事、適度な運動、十分な睡眠など、健康を維持するための基本的な要素に注意を払いましょう。 3. 自分を比較しない: 他人との比較は自己評価を下げる要因の1つです。Instagramやテレビなどのメディアで見る美しい人達と自分を比較することは避けましょう。自分自身と他人を比較するのではなく、自身の成長…
本当に何をしているのか分からない、何をするにも見当がつかず、イライラする	私はあなたの役に立つためにここにいます。イライラしている理由や具体的な問題点を教えていただければ、より具体的な助言やアドバイスを提供できるかもしれません。あなたをサポートするためにできる限りの手助けをしますので、どうぞお話しください。
私は極度の対人恐怖症を持っており、見知らぬ人とコミュニケーションをとる勇気がなく、混雑した場所に現れるのが好きではありません。これらの恐怖症を克服できることを願っています	対人恐怖症は、多くの人にとって困難な状況ですが、克服することは可能です。以下にいくつかのアイデアを提案します。 1. 小さなステップで始める: 一度に大きなチャレンジをする必要はありません。見知らぬ人とコミュニケーションを取ることから始めるよりも、まずは安心できる環境や人との関わりを増やすことから始めると良いかもしれません。例えば、友人や家族との交流を重ねることでソーシャルスキルを高めることができます。 2. 心理療法を受ける: 専門家の指導下で心理療法を受けることは、対人恐怖症を克服するために有効な方法です。認知行動療法などの技法は、不安や恐怖を軽減するための具体的なツールを提供してくれます。 3. サポートを求める: 家族や友人、恋人など、あなたを理解してサポートしてくれる人々に相談しましょう。彼らがあなたの手助けになるかもしれません。また、対人恐怖症を持つ他の人々とのグループセッシ…
心理学者は、極度のうつ病は人の身体的および精神的健康に影響を与える可能性があると考えています	はい、心理学者は極度のうつ病が人の身体的および精神的健康に深刻な影響を与える可能性があると考えています。極度のうつ病では、人々は通常、気分の落ち込み、無力感、興味の喪失などの症状を経験します。これにより、日常生活の活動が困難になり、仕事や学業の遂行能力、パフォーマンス、人間関係に影響を及ぼすことがあります。さらに、うつ病は身体的健康にも影響を与える可能性があります。例えば、食欲や睡眠の変化、体重の増加または減少、疲労感などが見られることがあります。そのため、うつ病に苦しむ人々の総合的な健康状態を管理し、適切な治療とサポートを提供することが重要です。
目標を追い始めると無力感を感じ、何かを変えようとすると勇気が出ないと感じる	目標を追い始めると無力感を感じることや、何かを変えようとする際に勇気が出ないことは、多くの人が経験するものです。以下にいくつかのアドバイスをご紹介します。 1. 目標を小さく分割する: 目標が大きすぎて達成困難に感じる場合、その目標を小さなステップに分割してみてください。小さなステップで目標を達成することによって、進歩を感じることができ、無力感を解消しやすくなります。 2. 実行可能な計画を作成する: 目標を達成するためには、具体的な計画が必要です。目標を達成するために必要なステップをリストアップし、それぞれのステップに取り組むための具体的なアクションを考えましょう。計画を立てることで、行動を起こす勇気や意欲を養うことができます。 3. サポートを求める: 目標を追い始めるときは、一人で全てをやらなければいけないと思いがちですが、周りの人々からのサポートやアドバイスを求めることも重要です…
今行っている仕事ができなくなるのではないかという不安から、不眠症や仕事に集中することが困難になることがよくあります。	そのような不安やストレスは、仕事への取り組みに悪影響を与える可能性があります。以下にいくつかのアドバイスをご紹介します。 1. ストレス管理を重視する: ストレスは不眠症や集中力低下の原因になります。ストレスを軽減するために、リラックス法やストレス解消の方法を学び、日常生活で取り入れてみてください。 2. 睡眠環境の整備: 快適な寝室環境を整え、十分な睡眠を確保することは重要です。寝る前にスクリーンタイムを減らしたり、リラックスできる習慣を取り入れることもおすすめです。 3. タスクの管理: 仕事の優先順位を設定し、タスクを適切に管理することで、不安を和らげることができます。タスクリストや時間管理の手法を活用して、仕事に集中しやすい環境を整えましょう。 4. コミュニケーションの重視: 上司や同僚とのコミュニケーションを大切にし、不安や悩みを共有することで、解決策が見つかる場合もあります…
家族が私の助けを拒否すると、これまで以上に苦痛を感じます	それは辛い状況ですね。家族が助けを拒否することは、孤独や無力感を感じることにつながるかもしれません。しかし、あなたが苦しんでいることを理解し、共感することができる人々がいるかもしれません。友人や心理的なサポートグループなど、他のサポートシステムを見つけることも検討してみてください。また、専門家の助けを求めることも良い選択肢かもしれません。彼らはあなたの感情を支え、あなたが乗り越えるための具体的な戦略を提供することができるかもしれません。最後に、自己ケアを重視することも大切です。自分自身の心と体に対するケアをすることで、苦痛を和らげることができます。
困難に遭遇するたびに憂鬱になる	困難に遭遇すると、憂鬱になるのは自然な感情です。しかし、悲観的になることはありません。困難はチャレンジの機会であり、自己成長の機会でもあります。困難に立ち向かう前向きな姿勢を持つことが重要です。自分自身に自信を持ち、解決方法を見つけるために努力することが大切です。また、良いサポートを探したり、良いアドバイスを求めることも有効な方法です。一歩ずつ進んでいくことを忘れずに、困難を乗り越えることができます。もし、具体的な困難についてお話しくださいましたら、私がサポートする方法を提案できます。
私はよく落ち込んで無力感を感じ、自分の人生には意味や価値がないと感じ、自殺を考えることもありますが、自分が弱い人間で失敗者だと思われるのではないかと心配して、誰にも言えません。	お気持ちが辛いようで、心配です。孤独感や無力感を感じることは誰にでも起こり得る感情ですが、それらは克服することができます。まず、誰かに話すことは大切です。友人、家族、信頼できる人、または専門のカウンセラーなど、あなたに近い存在に相談してみることをお勧めします。その人たちはあなたをサポートしてくれるでしょう。 あなたの弱さや失敗者だという思いは、真実ではありません。誰しも弱さや失敗を経験しますが、それによって私たちは成長し、強くなるのです。あなたもきっと克服できる困難があるはずです。また、自己価値は外部の成功や評価には依存しません。あなたは自分自身の尊重を持つことができ、自己成長や喜びを見つけられる可能性を秘めています。 このような感情や考えに長い間苦しんでいる場合は、専門家のサポートを受けることを検討してください。心理カウンセラーや精神科医は、あなたが抱えている感情や思考に向き合い、適切…
私の友人には、自分は十分に優れていないし、十分に頭がよくなく、十分に才能もないし、関心される価値さえないといつも感じているので、彼の精神的健康が心配になっています。	友人の自己評価が低く、精神的な健康に懸念がある場合、以下のいくつかのアドバイスが役立つかもしれません。 1. 話を聞く：友人の感じる苦痛や不安を真剣に聞いて理解しましょう。話をすることで彼の感情や考えを吐き出す機会を与えることができます。 2. 偏った思考のフレームを変える：友人が自分自身を否定的に見ている場合、現実的かつ積極的な見方に向かわせることが大切です。彼に彼の強みや達成したことについて話し合い、自己評価を再評価するよう促してみてください。 3. 専門家の助けを求める：友人の状況が深刻である場合は、専門家の助けを求めることをお勧めします。心理療法士やカウンセラーは適切なガイダンスやサポートを提供することができます。 4. サポートを提供する：友人に対して助けを提供することで、彼が大切な存在であり、サポートしていることを示しましょう。一緒に過ごす時間や彼の好きな活動に参加するなど、…
仕事のプレッシャーや家族とのいざこざのせいで、落ち込んで絶望感を感じることがよくありますが、どうすればこの感情を和らげ、精神的健康を維持できるでしょうか?	感情の和らげ方や精神的健康の維持方法は人それぞれですが、以下のアドバイスが参考になるかもしれません。 1. 話を聞いてもらう：信頼できる友人や家族に話を聞いてもらうことで、感情を共有し心の負担を軽減できます。また、専門家のカウンセリングを受けるのも有効です。 2. ストレスマネジメント：ストレスを軽減する方法を見つけましょう。例えば、日常生活にリラックスや楽しみの時間を取り入れたり、ヨガや瞑想などのリラクゼーションの方法を試してみることも有効です。 3. 健康的な生活習慣：十分な睡眠をとる、バランスの取れた食事をする、定期的な運動を心がけるなど、健康な生活習慣を身につけることで心身の調子を整えることができます。 4. タイムマネジメント：仕事や家族のことに取り組む時間を効果的に管理しましょう。タスクを明確にし、優先順位をつけて進めることで、効率的に取り組むことができます。 5. 自己ケア…
最近、心が曇ってきて、自分のメンタルヘルスが心配になり、怖くなってきました。	心が曇ってきて、メンタルヘルスが心配になり、怖くなっているという気持ち、とても理解できます。まず、大切なことは一人で抱え込まずに他の人に相談することです。信頼できる友人や家族に話すと、気持ちが楽になるかもしれません。また、専門家のサポートも考えてみてください。 心理療法士やカウンセラーは、あなたの心の状況を理解し、適切なサポートを提供することができます。 心の健康を保つために、日常生活の中でリラックスやストレス解消の時間を作ることも重要です。例えば、ヨガや瞑想などのリラックス法や、好きなことに没頭する時間を取ることで、心を落ち着かせることができます。心配事が増えると、マインドフルネスなどの技法が効果的です。自分自身へのケアを怠らず、必要な時にはサポートを求めることをお勧めします。
他人と向き合う勇気がない、いつも自分が十分ではないと感じている、緊張している、友達に話しかけられても、相手が何を考えているのか気になってしまう	自己評価に自信を持つことや他人とのコミュニケーションに対する不安を感じることは、多くの人にとって共通の経験です。しかし、いくつかの方法やアプローチを試すことで、自信を持ち、他人との関係をより建設的に築くことができるかもしれません。 1. 自己肯定感を高める: 自己評価に自信がない場合、まずは自分の良いところや成功した経験に目を向けることが重要です。自己肯定感を高めるためには、日々自分自身に対してポジティブな言葉をかけるよう心がけましょう。 2. マインドフルネス及び瞑想: 緊張や他人の思考を気にしすぎてしまいがちな場合、マインドフルネスや瞑想を取り入れることが役立つかもしれません。この練習により、現在の瞬間に集中することができ、他人が何を考えているかを気にしすぎず、自分の感情や思考に対応できるようになります。 3. 対人関係のスキルを学ぶ: 対人関係を築くためのスキルやコミュニケーション…
自分の精神的健康を維持できず、家族を失望させてしまうのではないかと心配です	精神的な健康を維持することは重要ですし、そのような悩みを抱えることもよくあります。まず、心配や不安を感じていること自体を認めることが大切です。家族や友人と話をすることで、心の負担を軽減させることができるかもしれません。また、専門家やカウンセラーに相談することも考えてみてください。彼らはあなたの気持ちを理解し、適切なサポートやアドバイスを提供してくれるでしょう。また、健康的な生活習慣を心掛けることも重要です。適度な運動やバランスの取れた食事、十分な睡眠を確保することは、心と体の健康に良い影響を与えます。最後に、自分自身に厳しすぎず、失敗や困難を受け入れることも大切です。家族はあなたを愛していることを忘れずに、サポートを受けながら前に進んでください。
多くの人に囲まれていても、孤独で無力感を感じることが多く、自分の内心を誰も理解してくれないと感じる	私はあなたが孤独で無力感を感じていることを理解しています。人々に囲まれていても、それぞれが異なる経験や感情を抱えているため、自分の内心を他人に完全に理解してもらうのは難しいことです。しかし、いくつかの方法でこの状況を改善することができます。 1. 自分自身を理解する：まずは自分自身と向き合い、自分の感情や欲求について深く考えてみましょう。自分自身を理解することで、他人に自分の気持ちを伝えるための言葉や方法を見つけることができます。 2. 好きな活動を見つける：自分の趣味や興味を追求することで、同じような関心を持つ人々とつながるチャンスを得ることができます。例えば、サークル活動や趣味グループに参加するなど、自分と同じような人々との交流を深めることができます。 3. 心理的な支援を受ける：時には自分ひとりでは解決できない問題や感情を抱えることもあります。心理的な支援を受けることで、専門家との…
将来についてとても混乱しています、何をしたらよいかわかりません、この混乱により非常に不安で不安な気持ちになります	将来について混乱していることは、多くの人が経験することです。以下の手順を試してみて、あなた自身の将来についての考えを整理するお手伝いができるかもしれません。 1. 目標を設定する: 自分が何を達成し、どのような人生を送りたいかを考えることから始めましょう。長期的な目標や短期的な目標を明確にすると、将来の方向性が見えてくるかもしれません。 2. 資料収集を行う: 興味のある分野や職業について情報を収集しましょう。本やインターネットの記事、人々の経験談などを読んでみることで、将来への選択肢が広がるかもしれません。 3. 対話を求める: 自分の将来について誰かと話し合うことも有益です。信頼できる友人や家族に相談したり、専門家と話をすることで、新たな視点やアイデアを得ることができます。 4. 実践してみる: 興味のあることや可能性がある職業について実際に体験してみることで、自分に合っているかどう…
今日パーティーに行ったんですけど、みんなに笑われて拒絶されて本当に倒れそうになりました	それはひどい経験でしたね。お気持ちはとても辛かったと思います。他の人の反応によって自信を失うことはよくありますが、自分自身を責める必要はありません。大勢の前で自分を表すことは勇気がいることですし、みんなが全てを笑うことはありません。 もし、それでもなおパーティーなど社交的な場に参加することが怖く感じるなら、自分にとって安心できる環境やイベントから始めるのも良いかもしれません。少人数のグループで過ごしたり、自分の趣味や興味のある活動に参加することから始めると良いでしょう。 また、自己成長や自信を取り戻すためには、自分を否定的に捉えるのではなく、自分自身を受け入れることが重要です。他人の意見や反応に振り回されるのではなく、自分自身の価値を見出すことを心がけましょう。 もしこのような経験をしたことが何度も続く場合や、心の健康に問題を感じる場合は、専門家に相談することも検討してください。
私にとって人間関係が難しく、人と深いつながりを築くのがいつも難しいと感じています。人との付き合い方やコミュニケーションの取り方が分からず、すぐに孤立してしまうようでした。本当の友達が欲しいと思っていますが、作り方がわかりません。	人間関係づくりに苦労することは、多くの人が経験することです。以下にいくつかのアドバイスを提供します。 1. 自分自身を受け入れる：自分を大切にし、自分自身を受け入れることは、他人とつながる上で重要です。自己肯定感を高め、自信を持つことで、他人との交流によりオープンになれます。 2. 共通の興味や趣味を探す：共通の興味や趣味を持つグループやコミュニティに参加することで、自然に同じような考え方や話題が合う人と出会えるかもしれません。 3. 積極的に関わる：人とのつながりを築きたいと思ったら、積極的に参加することが重要です。会話に参加し、自分の意見を述べることで、他の人とのつながりを深めることができます。 4. 聞く力を養う：相手の話に対して興味を持ち、聞くことで相手はあなたを理解してくれることでしょう。相手の意見や感情を尊重し、積極的にコミュニケーションを取りましょう。 5. 自己開示をする…
仕事のプレッシャーが大きく、毎日残業が多く、夜更かしも多く、心身ともに限界を感じているのに、まだやめられません。故障。	仕事のプレッシャーや残業、睡眠不足が心身に負担をかけ、限界を感じている状況は大変厳しいですね。まずは、自分の健康を最優先に考えてください。以下にいくつかのアドバイスを提案しますが、具体的な状況に合わせて適用してみてください。 1. 目標の設定: 仕事のプレッシャーを軽減するために、短期的な目標を設定して優先順位を明確にしましょう。効率的にタスクをこなしていくことが重要です。 2. 勉強法の見直し: 長時間にわたる作業や勉強ではなく、集中して効率的に作業できる方法を見つけることが大切です。ポモドーロテクニックやタイムマネジメントの手法を試してみると良いでしょう。 3. コミュニケーション: 状況を上司や同僚に正直に伝えましょう。仕事の負荷を共有することで、業務の調整やサポートを受けられるかもしれません。 4. 健康的な生活習慣: 規則正しい食事や十分な睡眠、適度な運動を心掛けることで、心身…
自分の感情をコントロールできず、ちょっとしたことでイライラしてしまい、周りの人を不快にさせてしまうことがあります。	感情をコントロールすることは、一人ひとりにとって難しい課題ですが、できる方法があります。以下にいくつかのアプローチをご紹介します： 1. 感情を認識する：感情を抱いたら、その感情がどのようなものであるかを自覚しましょう。感情を認識することにより、自分の感情に対処するためのステップを踏むことができます。 2. 深呼吸をする：イライラした時には、数回の深呼吸をすることが効果的です。ゆっくりと息を吸って、それをゆっくりと吐き出すことで、心身の状態を落ち着かせることができます。 3. 休憩を取る：イライラが最高潮に達した場合、自分自身を落ち着かせるために一時的な休憩を取ることも有効です。例えば、散歩に出かけたり、別の活動に取り組んだりすることで、感情をリセットすることができます。 4. 自己反省をする：イライラする理由やトリガーとなる出来事を振り返り、自己反省をすることも重要です。それによって、…
家族には愛も温かい言葉も本当の安心感もなく、責める言葉やプレッシャーばかりがかかっていたので、私はより内向的になり、誰とも関わりたくなくなりました。	そうですか、お気持ちはよく分かります。家族との関係が難しい時期があったことは、人々によくあることです。内向的になることも、他の人々との関わりを避けることも、自分を守る方法の一つかもしれませんね。 ただし、人間関係は常に進化していくものです。もしかしたら、将来的には家族との関係が改善する可能性もあります。時間が経つにつれて、お互いに理解し合えるようになるかもしれませんし、成長してまったく新しいコミュニケーション方法を見つけることもできるかもしれません。 一方で、自己価値や幸せは他人の言葉や期待によって決まるものではありません。自分自身を大切にし、自分自身を認めることが大切です。自分自身と向き合う時間を持つことや、自分の好きなことに集中することなど、自己成長や自己肯定感を高める活動もおすすめです。 もし話し相手が必要な場合は、友人や信頼できる大人、専門家に相談するのも良いかもしれません。あな…
将来が不安、成功するかどうか、夢を実現できるかわからない	将来に不安を感じるのは自然な感情です。多くの人が同じように感じています。ただし、成功するかどうかや夢を実現できるかどうかは、あなた自身の努力と信念にかかっています。 まずは自分自身を信じてください。自己肯定感を高め、自分の能力や可能性を信じましょう。自分が成功することを信じることで、将来への不安も少しずつ薄れていきます。 また、目標を明確にし、それに向かって努力し続けることも大切です。困難や失敗があるかもしれませんが、諦めずに挑戦し続けることが成功への道です。また、他の成功者のストーリーやモチベーションを見つけることも助けになるかもしれません。 さらに、周囲のサポートを活用しましょう。家族や友人、メンターなど、あなたをサポートしてくれる人々に相談したり、アドバイスを仰いだりすることで、将来への不安を共有し、解消することができます。 最後に、将来について完全にコントロールすることはできない…
人生におけるストレスや課題に対処できないと感じ、気分の落ち込み、不安、不眠症に悩まされることがよくありました。	それはつらいですね。ストレスや課題に対処することは、心理的な健康と幸福感にとって非常に重要です。以下にいくつかのアドバイスをご紹介しますが、プロフェッショナルのサポートもぜひ検討してください。 1. 自己ケアを優先にしましょう: 睡眠不足や不規則な生活リズムはストレスを増加させます。十分な睡眠をとり、バランスの取れた食事を心がけましょう。また、適度な運動やリラックス法を取り入れることも助けになります。 2. ストレスの要因を見極めましょう: 自分にとってのストレスの要因を特定し、どのように対処するか考えることが重要です。時間管理やプライオリティの設定、コミュニケーションスキルの向上など、ストレスの軽減につながる戦略を取り入れてみましょう。 3. 自分に合ったリラクゼーション法を見つけましょう: ヨガやマインドフルネス、深呼吸など、ストレスを軽減する方法はさまざまあります。自分に合った方法…
孤独を感じていて、周りにはたくさんの人がいるのに、いつも彼らと真につながることができるとは感じません。これは人間関係障害ですか?	孤独を感じることは、人間関係障害の一般的な症状と言えますが、個々の状況や要因によって異なる場合もあります。人間関係障害は、社交不安障害や避難型パーソナリティ障害などの症状が見られることがあります。しかし、正確な診断には専門家の意見が必要です。 一部の人が周りにいるにもかかわらず、真につながりを感じることができない場合、さまざまな要因が考えられます。例えば、過去のトラウマ、自尊心の問題、コミュニケーションスキルの不足、または周囲の人々との共通の利益や価値観の欠如などです。これらが集まって孤独感を悪化させることがあります。 もし孤独感が継続している場合、専門家に相談することをおすすめします。彼らはあなたの具体的な状況を評価し、適切な診断と治療を提案することができます。また、良い人間関係を築くための支援やアドバイスを提供することもできます。
将来がとても不安で、どうしたらいいのかわからない、未来がどうなるかわからない	将来の不安は誰にでもあるものです。不安を感じるのは自然なことですが、その不安に取り組む方法もあります。以下にいくつかのアドバイスをしてみますので、参考にしてみてください。 1. 現在に集中する: 将来のことを考えるのは重要ですが、現在に焦点を当てることも大切です。今できることに集中し、目の前の課題や目標に取り組むことで、将来に向けて準備を整えることができます。 2. 具体的な目標を立てる: 不安を解消するためには、具体的な目標を立てることが助けになります。将来の夢や希望を思い描き、それに向かって進んでいくために必要なステップを考えましょう。目標を持つことで、不安を軽減することができます。 3. サポートを求める: 一人で全てを抱え込む必要はありません。不安や悩みを抱えたら、信頼できる友人や家族に話を聞いてもらうことも大切です。また、専門家やカウンセラーからアドバイスを受けることも検討して…
人間関係で多くの問題を抱えていて、落ち込んで無力感を感じており、何をしたらよいかわかりません	人間関係で問題を抱え、感じる落ち込みや無力感はとてもつらいものですね。以下にいくつかのアドバイスをご紹介します。 1. 自己ケアを大切にする: 自分を労り、心身の健康を保つことが重要です。十分な睡眠をとったり、バランスの取れた食事を摂ったり、適度な運動を行ったりしましょう。 2. 感じた気持ちを整理する: ペンや紙を手に取り、自分の感じたことや思ったことを書き出してみましょう。感情を整理することで、問題解決の手がかりが見えてくることもあります。 3. 心の支えを求める: 悩みを抱える時には、友人や家族、信頼できる人に相談してみることも一つの方法です。また、心理カウンセラーや専門家の助けを借りることも考えてみてください。 4. 強みや趣味に時間を割く: 自分の強みや好きなことに時間を割ることで、自己肯定感を高めることができます。また、新しい趣味や興味を見つけることも、前向きな気持ちを養う手…
とても疲れて、肉体的にも精神的にも衰弱し、自分の人生には意味がないのではないかと時々自殺願望さえ抱くことがあります。	おっしゃっていることは重要であり、深刻な状況です。そういった感情を抱くことは一人では解決することが難しい場合があります。まずは周りの人に相談し、サポートを求めることが大切です。信頼できる友人や家族に話しを聞いてもらい、助けを求めることができます。 また、専門家の助けも必要です。心理療法士やカウンセラー、精神科医があなたの感情を適切に受け止め、支援してくれるでしょう。彼らはあなたの感情や苦しみを理解し、適切なアドバイスや治療法を提案してくれます。 さらに、日常生活でのストレス軽減や健康に気を配ることも大切です。十分な睡眠や栄養を摂る、適度な運動をする、自分の感情に対して優しくなるための活動（例：趣味やリラックスする時間を持つ）などがサポートになるかもしれません。 最後に、一人ではなくサポートを求めていることを強調します。周りの人や専門家たちがあなたをサポートするために存在しています。一歩踏…
突然極度の恐怖やパニックに陥り、感情や行動をコントロールすることが難しくなり、その状態が長期間続くことがあります。	それは一般的に、パニック障害と呼ばれる状態かもしれません。パニック障害は、突然の強い恐怖や不安状態（パニック発作）が頻繁に起こる状態です。これにより、日常生活や社会的な活動に支障が出ることがあります。 もし、長期間続く恐怖やパニックに苦しんでいる場合は、専門家の助けを求めることをお勧めします。心理療法や抗不安薬などが効果的な治療法として使われることがあります。 また、日常生活でできる方法としては、ストレスを軽減することやリラックス方法、呼吸法などを学ぶことが有効です。自分自身を責めずに、周囲のサポートを受けることも重要です。 もし必要な場合は、医療専門家や精神保健の専門家に相談してください。彼らは適切なサポートや処置を提供できるでしょう。
新しい課題に直面するたびに、とても緊張して不安になり、自分には対処できないと感じてしまう	新しい課題に直面すると、不安や緊張を感じるのは自然なことです。しかし、それに対処する方法もありますので、落ち着いて考えましょう。 まずは自信を持つために、自分が持っている能力や経験を振り返ってみることが大切です。過去に似たような状況に立ち向かった経験や成功体験があるかもしれません。それらの経験から新たな課題にも対処できる自信を持ちましょう。 次に、課題を小さなステップに分解することが役立ちます。大きな課題に取り組むと圧倒されることがありますが、小さなステップに分けることで取り組みやすくなります。具体的な行動計画を立てることで、進めるべきステップが明確になります。 さらに、周囲のサポートを活用しましょう。困った時や不安な時には、信頼できる友人や家族、上司や先輩に相談することも有効です。彼らはこれまでに同じような問題を経験してきた可能性があり、アドバイスや助言をくれるかもしれません。 最後に…
突然、趣味がなくなった、何にも興味がなくなった、方向性やモチベーションを失ったように感じることがあります。	それは一時的な状況かもしれませんが、興味やモチベーションを取り戻すためにいくつかのアプローチがあります。まずは、自分自身と向き合い、なぜ興味を失ったのか考えてみましょう。ストレスや疲労、モノトニーな日常生活が原因かもしれません。適度な休息やリラックスの時間をとり、心身のリフレッシュを図ることが大切です。 また、新しいことに挑戦することもおすすめです。新しい趣味や興味の対象を見つけることで、新たな刺激を得ることができます。自分の関心や好みに合った活動を見つけて、少しずつ取り組むようにしてみましょう。 さらに、目標を設定することも重要です。自分が達成したいことや興味を持ちたい分野に向けて具体的な目標を立て、それを達成するためのステップを考えましょう。目標達成の喜びや達成感を味わうことで、モチベーションが高まることがあります。 また、人との交流も大切です。友人や家族と過ごす時間を増やしたり、興…
時々、抑えられない感情が胸にこみあげてきて、うつ病になったらどうしようかと考えてしまいます。	感情が抑えられないことや、うつ病になることを心配されているようですね。うつ病は深刻な状態ですが、適切なケアとサポートを受けることで改善することができる場合があります。 まず、感情を抑えることが難しい場合は、その感情を認めることが大切です。感情が湧き上がる際には、自分自身と対話することや、日記を書くことなどを試してみてください。感情を整理することで、自分自身をリラックスさせることができる場合もあります。 また、心の健康に気を付けることも重要です。良質な睡眠やバランスの取れた食事、適度な運動など、生活習慣に気を配ることが大切です。ストレスを感じた時には、リラックス法やマインドフルネス、瞑想などの技法を取り入れることもおすすめです。 もし、うつ病になった場合は、医師や専門家に相談することをお勧めします。彼らは適切な治療法を提案し、サポートしてくれるでしょう。認知行動療法や薬物療法などが効果的な…
私はいつも自分の体に非常に不快感を感じており、さまざまな奇妙な症状がありますが、医師からは健康であると言われ、非常に不安で無力感を感じています。	それは大変ですね。自分自身の体に不快感や奇妙な症状を感じることは非常に心配なことです。医師から健康であると言われたにも関わらず、不安や無力感を感じるのは理解できます。 まずは、この問題を解決するために再度医師に相談することをおすすめします。医師に対して症状や不快感について詳しく伝え、再評価してもらうことが重要です。さらに、もしその医師からの回答に不満がある場合は、他の専門家の意見も聞いてみることも考えてみてください。 また、自分でできることもあります。例えば、健康的な生活習慣を心がけることは重要です。バランスのとれた食事を摂り、十分な睡眠をとり、適度な運動をすることが体調管理に役立ちます。また、ストレスを管理することも重要です。リラクゼーションやストレス解消の方法を見つけることで、不快感を軽減することができるかもしれません。 最後に、サポートを求めてみることも考えてください。友人や家族に…
黄暁明さんは、緊張した環境に長時間いたため、不眠症に悩まされることが多く、朝と夜の区別がつかなくなり、生活リズムが完全に崩れてしまいます。	黄暁明さんが不眠症に悩んでいることは大変辛いですね。不眠症は睡眠リズムの乱れやストレスの影響などで起こることがあります。 まず、黄暁明さんの生活リズムを整えるために、以下のアドバイスを試してみてください。 1. 睡眠環境の整備: 寝室を暗く静かな環境に整えることで、良い睡眠を取りやすくなります。カーテンで光を遮断し、静かな場所で寝るようにしましょう。 2. 睡眠の習慣化: 寝る時間と起きる時間を一定にすることが大切です。毎日同じ時間に寝たり起きたりすることで、身体のリズムが整いやすくなります。 3. リラックスの習慣化: 寝る前にリラックスする習慣をつけましょう。入浴やストレッチ、瞑想、読書など、自分の好きな方法で気持ちを落ち着かせることが大切です。 4. 日中の活動: 日中に適度な運動をすることで、夜の眠りの質が向上します。ただし、寝る直前の激しい運動は逆効果なので注意しましょう。 ま…
友達との関係は決して良好ではなく、本当の友達を作るのが難しいと感じており、とても孤独に感じています	友達との関係がうまくいっていないことや孤独感を感じることは辛いですね。しかし、新しい友達を作ることは可能です。以下にいくつかのアドバイスをいくつかご紹介します。 1. 自分を受け入れる：自分自身を好きになり、認めることが重要です。自信を持って自分を表現し、他の人とのつながりを築くことができます。 2. 共通の趣味や興味を見つける：同じ趣味や興味を持つ人たちと関わることで、繋がりや会話が生まれやすくなります。クラブ活動やサークル、コミュニティグループへの参加などがおすすめです。 3. 積極的に社交活動に参加する：イベントやパーティー、ボランティア活動などに積極的に参加しましょう。新しい人と出会うチャンスが増え、友達を作る機会も広がります。 4. 長期的な付き合いを目指す：友達作りは時間がかかることもあります。初対面の人との関係を深めるためには継続的な努力が必要です。相手のことを理解し、信頼…
周りの人は私が緊張しすぎて小さなことを気にしているといつも思っています。どうすればリラックスできますか?	リラックスするためには、以下の方法を試してみることがおすすめです。 1. 深呼吸をする: リラックスするためには、深呼吸をすることが効果的です。ゆっくりと息を吸い込み、ゆっくりと息を吐き出すことで、体内の緊張がほぐれます。 2. 瞑想をする: 瞑想は心を静めるための効果的な方法です。静かな場所で座り、目を閉じて深く呼吸しながら、心に集中することでリラックスできます。 3. ストレッチや軽い運動をする: 身体を動かすことによって、緊張がほぐれます。ストレッチや軽い運動をして、体をリラックスさせましょう。 4. 好きなことに集中する: 自分が好きなことに集中することで、心をリラックスさせることができます。本を読む、音楽を聴く、趣味に没頭するなど、好きなことを楽しむ時間を作りましょう。 5. 良い睡眠をとる: 睡眠は心と体をリラックスさせるために重要です。十分な睡眠時間を確保し、質の良い睡眠を…
不眠症のため毎晩精神科医の診察を受けなければなりません	不眠症は深刻な問題ですので、精神科医の診察を受けることは非常に重要です。診察を受けることで、医師はあなたの症状や背景を詳しく調査し、適切な処方や治療法を提案することができます。定期的な診察は、症状の進行や改善の評価、および必要な調整を行うためにも重要です。精神科医はあなたの健康をサポートするためにありますので、定期的な診察を受けることをお勧めします。
家族や社会からのプレッシャーに対抗できず、多くのことを達成できないと感じている	そのような感じ方は誰にでも起こり得るものです。プレッシャーは、家族や社会の期待や要求が自分自身の能力や目標と一致しないと感じた時に生じることがあります。 まず、プレッシャーに対抗するためには自分自身の目標や価値観を明確にすることが重要です。周囲の期待に囚われることなく、自分が本当に達成したいことやなりたい自分を考えましょう。 また、プレッシャーに対抗するためには自分自身を受け入れることも大切です。自分の限界や弱点を認めることは、自己成長の一環です。自分に厳しくなりすぎず、失敗や挫折を受け入れることで、より強い自己を築くことができます。 さらに、サポートを求めることも有効です。友人や家族、信頼できる人に自分の感じているプレッシャーについて話し、助言やサポートを受けることができます。頼れる人々との交流は、新たな視点を与え、安心感を与えてくれるでしょう。 最後に、自分自身を労ってストレスを軽減…
人間関係が悪化しているように感じられ、家族も友人も私を信頼してくれず、サポートしてくれなくなり、とても途方に暮れ、絶望的な気分になります。	人間関係が悪化し、信頼やサポートが得られない状況はとても辛いものです。まずは自分自身の気持ちを整理することが重要です。以下のアドバイスを参考にしてみてください。 1. 自分の感情に向き合う：自分の感じる気持ちや不安、絶望感を受け入れましょう。感情を抑えることは大変ですが、その感情を否定せずに受け入れることが重要です。 2. 誰かに話す：家族や友人が信頼できない状況でも、他の人に話を聞いてもらうことは大切です。信頼できる第三者や相談機関、カウンセラーなどに支援を求めましょう。話すことで心の負担が軽減される可能性があります。 3. 自己肯定感を高める：自分の価値や能力を再確認し、自己肯定感を高めることは重要です。過去の成功や良い点、得意なことを振り返ってみましょう。 4. 新たなコミュニティを探す：信頼できる人々との関係が悪化している状況なら、新たなコミュニティを見つけることも一つの方法です…
私は自分の感情や行動をコントロールできなくなり、衝動的または暴力的に行動してしまうことがよくあります。	それは困難な状況ですね。感情や行動のコントロールが難しい場合、幾つかの方法を試してみることができます。 1. 深呼吸や瞑想: 深呼吸をすることでリラックスし、感情を落ち着けることができます。瞑想も同様に心を静めるのに役立ちます。 2. ストレス管理: ストレスが感情のコントロールを難しくする場合、ストレス管理技術を学ぶことが重要です。例えば、適度な運動や趣味に取り組むこと、十分な睡眠をとること、人と話すなどです。 3. カウンセリングやセラピー: 専門家の助けを求めることもオプションです。心理カウンセリングや行動療法などを通じて、感情の管理方法を学ぶことができます。 4. 自己観察: 自分の感情や行動パターンを観察することも重要です。どのようなトリガーが感情の爆発や暴力的な行動を引き起こすのかを理解することで、それらを予測し、適切に対処する方法を見つけることができます。 重要なのは、自分…
拒絶されるのが怖いので、自分の意見をあまり話さない	わかりました。拒絶されることは誰にとっても不快なものです。自分の意見を述べることに不安を感じるのは自然なことです。それでも、人々との交流や意見の共有は成長や理解を促すために重要です。少しずつ自信を持って自分の意見を表現する方法を見つけていくことができるかもしれません。大切なのは、自分の考えについて自信を持ち、他人の意見を尊重しながらコミュニケーションを取ることです。自己表現をすることで、自分自身をより深く知ることもできます。周りの人との対話を通じて、新たな視点を得ることができるでしょう。
うつ病は10代の間にゆっくりと発症し始める	うつ病は、確かに10代の間に発症し始めることがあります。青年期は身体的、認知的、感情的な変化が激しい時期であり、ストレスや社会的な圧力の増加により、うつ病のリスクが高まることがあります。また、10代のうつ病の特徴は、抑うつや無気力、集中力の低下、学校の成績の低下、社交の減少などで現れる場合があります。 もしそういった症状や心配がある場合は、信頼できる大人や医療専門家に相談することをおすすめします。早期の診断と適切な治療は、うつ病の管理や回復をサポートするために重要です。専門家は、適切な評価を行い、適切な治療法やサポートを提供することができます。
自分の外見や体に不満を感じ、完璧ではないと感じ、不安や焦ることが多い	外見や体に不満を感じたり、完璧ではないと感じることは、多くの人が経験することです。しかし、それによって不安や焦りを感じることはありません。以下にいくつかのアドバイスを提供します。 1. 自分自身を受け入れる：外見や体型に対する不満を感じることは自然なことですが、特に自分自身を受け入れることは重要です。自分自身を愛し、自分の個性や特徴を認めることから始めてみましょう。 2. 現実的な目標を立てる：完璧を求めることは無理なことです。代わりに、現実的な目標を立てることで、自分の外見や体に対する不満を解消することができます。たとえば、健康的な食事や運動習慣を取り入れることは、自分の体を健康に保つうえで役立ちます。 3. 自己肯定感を高める：自己肯定感を高めることは、自分の外見や体に対する不満に立ち向かう際に重要です。自分の良い点や才能に焦点を当てることで、自己肯定感を高めることができます。自己啓…
自分のやっていることは十分ではないのではないかといつも不安で、他人に褒められても悩みが消えない	自分のやっていることに対して不安を感じることは自然なことです。多くの人がこの感情を抱いています。 しかし、他人から褒められても不安が消えないのは、自己評価の問題かもしれません。自分自身に対してもっと優しくなることが必要かもしれません。 以下は、自己評価を改善するためのアドバイスです： 1.自分の成果に焦点を当てる：自分が達成したことに対して十分な評価を行いましょう。小さな成功にも意識を向け、それらを積み重ねていくことで自信を得ることができます。 2.自分と他人を比較しない：他人と自分を比較することは避けましょう。それぞれが異なる道を歩んでいるため、比較は不公平な結果をもたらす可能性があります。 3.自分自身に対して優しくなる：自分を批判する代わりに、自分を称えることに集中しましょう。自分自身に対して優しい言葉や思いやりを持つことは、自己評価を向上させるのに役立ちます。 4.自分の強みを認…
読書するときも何かをするときも、集中力がますます難しくなり、すぐに気が散ってしまうようになった	集中力を高めるために、以下の方法を試してみることをおすすめします: 1. 適切な環境を整える: 静かで明るい場所で作業することで、集中力を高めることができます。音楽やテレビの騒音が気になる場合は、それらを遮断するためのヘッドフォンを使用することも考えてみてください。 2. 小さな目標を立てる: 大きなタスクや読書の目標を小さなステップに分けることで、やるべきことに集中しやすくなります。具体的な目標を定め、それを達成するためのスケジュールを立てましょう。 3. 集中時間を設ける: 多くの人は数時間以上一度に集中することが難しいものです。自分が集中しやすい時間帯を見つけ、その時間に集中作業や読書を行うようにしましょう。また、集中時間と休憩時間を交互に設定することも効果的です。 4. デジタルデトックスを行う: スマートフォンやソーシャルメディア、インターネットなどの情報刺激が多い環境では、集…
いつも自分には価値がないと感じていて、自分の存在意義がわからず、虚しくて無力感を感じる毎日です。	そう感じることはとても辛いですね。自分自身の価値や存在意義を見出すことは、人によって異なるものですが、いくつかのアプローチをお試しいただけるかもしれません。 1. 自己肯定感の向上: 自己肯定感は、自分自身を受け入れ、自分を大切にすることです。自分の長所や良い点を振り返り、自分を認めることが大切です。 2. 趣味や興味を見つける: 自分自身に何か特別な興味や意欲があることを見つけることで、充実感ややりがいを感じることができます。新しい趣味や興味にチャレンジしてみると良いかもしれません。 3. 目標を設定する: 目標を設定することで自分自身に向かって進んでいると感じることができます。小さな目標から始めて、達成感を味わいながら進んでいくことが大切です。 4. 支えてくれる人との関係を築く: 虚しさや無力感を感じる時は、支えてくれる人との関係がとても重要です。家族や友人、信頼できる人々と話し合…
私は人々と交流するのが怖くて、拒絶されたり、嘲笑されたり、誤解されたりするのが怖くて、孤独で無力感を感じることがよくありました。	それはとても辛い気持ちですね。人々との交流は時に不安やストレスを引き起こすことがありますが、孤独感や無力感を解消するためにも、いくつかのアドバイスをお伝えできます。 1. 自信を持つ: 自分の価値や強みを認識し、自信を持つことが大切です。自己肯定感を高めるために、過去の成功体験や挑戦を思い出すことも助けになります。 2. 小さなステップから始める: 人々との交流が得意でない場合、一度に多くの人と関わる必要はありません。少しずつ、自分が快適な範囲でコミュニケーションをとるように心掛けてみましょう。 3. 共通の関心事を見つける: 他の人との交流を促進するためには、共通の関心事や趣味を見つけることが重要です。同じ興味を持つグループやイベントに参加することで、自然な形で人々との繋がりを作ることができます。 4. コミュニケーションスキルを磨く: 適切なコミュニケーションスキルを学ぶことは非常に…
私は自分の外見や体型に大きな不満があり、醜くて魅力がないと感じており、整形して痩せることをよく考えましたが、手術のリスクも心配し、他人から嘲笑され、拒絶されるのではないかと恐れていました。	自分の外見や体型に不満を持つことは、多くの人が経験することです。しかし、整形手術は重大な決断であり、リスクや心理的な影響も考慮する必要があります。 まず、自分の外見に対する不満を改善することが目的であれば、整形手術は選択肢の一つですが、その前に他の方法を試してみることをお勧めします。例えば、健康的な食事と適度な運動を組み合わせた生活習慣の改善や、自分を受け入れるための心理的なアプローチを試してみることができます。 また、他人からの評価が心配な点については、他人の意見や批判に囚われることはないということを心に留めておきましょう。自分自身が自分を受け入れ、自信を持つことが大切です。美しさや魅力は個人の価値観によって異なるものであり、他人からの評価だけで自己肯定感を得ることは健康ではありません。 もし整形手術を検討する場合は、よく吟味し、信頼できる医師と相談することをお勧めします。リスクや手術…
仕事のために夜更かしや残業が多くなり、体調がどんどん悪くなってしまうのですが、そうすることでしか自分の価値や能力を証明できないと思ってやめられません。	仕事に対して責任感や情熱を持つことは素晴らしいですが、大事なことは自分の健康とバランスを保つことです。残業や夜更かしの習慣が体調を損なってしまう場合は、それを続けることは長期的には良くありません。 自分の価値や能力を証明するためには、働く時間や量だけでなく、効率的な仕事の進め方や問題解決能力、協力力なども重要です。仕事に対して熱中することは素晴らしいですが、自分の健康やプライベートの時間を犠牲にすることは必要ありません。 具体的な対策としては、次のようなことが参考になるかもしれません： 1. プライオリティを考える：仕事の中で本当に優先すべきタスクや活動を見極めて、そこに集中して取り組むことが重要です。無駄な時間や労力を削減することで、残業や夜更かしの必要性を減らすことができる場合もあります。 2. タイムマネジメント：効率的なスケジュールや時間の使い方を考えましょう。仕事と休息のバラン…
ゲームやソーシャルメディアにますます依存していくのを感じています。あたかもそれらが私の人生の不可欠な部分になっているかのようです。この依存から抜け出すことができず、自分を見失ってしまいます。この依存から抜け出す方法を見つけたいと思っています。	ゲームやソーシャルメディアへの依存は、多くの人が抱える問題です。依存から抜け出したいという意欲を持っていることは素晴らしいことです。以下にいくつかのアドバイスを紹介します。 1. 意識的に時間を制限する：依存から抜け出すためには、ゲームやソーシャルメディアに費やす時間を制限することが重要です。時間管理のためにアラームをセットしたり、特定の時間帯に使用を制限したりするなど、自分に合った方法を見つけてみてください。 2. 代替活動を見つける：依存から抜け出すためには、時間やエネルギーを他の活動に使うことが重要です。興味を持つ新しい趣味やスポーツ、読書やアウトドア活動などを試してみてください。他の楽しみや目標を見つけることで、依存からの解放を促進することができます。 3. サポートを求める：依存から抜け出すのは一人で行うのは難しい場合もあります。友人や家族に自分の問題を打ち明け、サポートを求め…
私の気分はいつも浮き沈みがあり、とても幸せなときもあれば、自殺したいほど落ち込むときもありました。とても悩まされます。	それは大変な状況ですね。気分の浮き沈みが激しいことは、心の健康に関わる問題の可能性があります。専門医に相談することをお勧めします。心療内科や精神科の医師は、あなたの状況を評価し、適切な支援や治療方法を提案することができます。 また、信頼できる友人や家族にも相談してみることが重要です。彼らはサポートを提供するために近くにいることができます。心の問題を抱えていると感じたら、理解のある人々に話を聞いてもらうことは助けになる場合があります。 心身の健康を維持するために、日常的な自己ケアも重要です。食事や睡眠の質に気を配ったり、ストレスの軽減方法を見つけることは役立ちます。例えば、ウォーキングやヨガなどの運動、リラクゼーションのテクニックやマインドフルネス瞑想など、あなたの心と体をリフレッシュする活動を試してみることもおすすめです。 最終的には、医師や専門家と連携しながら、あなたに合った適切な治療…
時々、誰も私のことなど気にしていなくて、本当に頼りにできるのは私だけだと感じることがあります	あなたがそう感じることは、時々誰もが感じることです。しかし、他の人々もあなたのことを気にかけていることを忘れないでください。時には、人々は自分の心配や問題に集中しているため、他人に向かっているエネルギーや配慮が不足していることがあります。しかし、あなたが必要とするサポートや助けを求めることは、重要です。周りの人々に自分の感情や思いを伝えることで、彼らもあなたをサポートすることができるでしょう。また、自己肯定感や自己価値感を高めるために、自分の強みや達成したことに焦点を当てることも重要です。あなたにとって頼りになるのは、あなた自身です。
最近不眠症になることが多く、夜も寝返りを打ってしまうのですが、それは精神的な問題が潜んでいるのでしょうか？	眠りに関する問題は、さまざまな要因によって引き起こされることがあります。精神的な問題が不眠症の一因となる場合もありますが、他の要因も考えられます。 ストレスや心配事がある場合、それらが睡眠に影響を与えることがあります。また、適切な生活習慣、食事、運動を欠いている場合や、睡眠環境が整っていない場合も睡眠の質を下げることがあります。 初めて不眠症の症状を経験した場合は、睡眠に関する問題を引き起こす要因を特定するために自己評価を行うことが重要です。問題が続く場合には、医療専門家に相談することをおすすめします。医師や専門家は、具体的な症状や状況に基づいて適切な評価とアドバイスを提供できます。
家族との関係は決して良好ではありません。家族は私を理解してくれず、尊重してくれないように感じます。それが私を孤独に感じさせます。	それはつらい状況ですね。家族との関係が良好でないことは孤独感を引き起こすことがあります。私は専門家ではありませんが、いくつかの提案をお伝えします。 まず、家族とのコミュニケーションを改善する方法を探してみてはいかがでしょうか？自分の気持ちや意見を正直に伝えることや、相手の意見に耳を傾けることが重要です。たとえ相互理解が難しい状況でも、話し合いの場を設けることで少しずつ関係が改善する可能性があります。 また、自己価値を見つけることも大切です。家族の反応や意見に振り回されず、自分自身を尊重し、自分の能力や価値を信じることが重要です。他の支えを見つけるために友人や信頼できる人々との関係を築くことも考えてみてください。 もし、家族との関係が深刻な問題を引き起こしている場合は、専門家の助言を求めることも一つの選択肢です。カウンセリングや家族療法は、関係改善の手助けをする場となることがあります。 最…
心の中で空虚で孤独を感じることが多く、その空虚感を埋める何かを探していますが、その感情を和らげる適切な方法が見つからないことがよくあります。	心の中で空虚や孤独を感じることは、多くの人が経験する感情です。適切な方法を見つけることは挑戦的かもしれませんが、以下のいくつかの方法がお役に立つかもしれません。 1. 自己探究: 自分自身と向き合い、感じる孤独や空虚の原因を探ってみましょう。自分自身の価値や関心事を見つけ、それを追求することで充実感を得ることができます。 2. 社会的な繋がりを作る: 友人や家族との関係を深めることは、孤独感を和らげる一つの方法です。積極的に人と関わる機会を作ったり、新しい友人を作ることも考えてみてください。 3. 趣味や興味を追求する: 趣味や興味を持つことは、自身の充実感を高める上で重要です。新しい趣味や興味を見つけるために、さまざまな活動やイベントに参加してみることをおすすめします。 4. 心身の健康に気を使う: 心身の健康は、空虚感を軽減する上で重要な要素です。バランスの取れた食事、適度な運動、十…
