# Supplementary material
Source: ML conference proceedings conference paper supplement (https://openreview.net/forum?id=JL42j1BL5h)
Supplement: supplementary_material [file Mental_Health_gpt.xlsx]

## Sheet: Sheet1
Input	Output
Ich fühle mich oft einsam und hilflos, niemand scheint mich zu verstehen. Ich fühle mich sogar wie ein Versager, ohne jeglichen Wert und Sinn. Dieses Gefühl macht mich sehr traurig und verzweifelt, ich weiß nicht, wie ich es loswerden kann.	Es tut mir leid zu hören, dass du dich so einsam und hilflos fühlst. Es ist wichtig zu wissen, dass du nicht allein bist und dass es Menschen gibt, die dir helfen können. Es ist normal, hin und wieder negative Gefühle zu haben, aber wenn diese Gefühle überwältigend werden, ist es wichtig, Unterstützung zu suchen. Es gibt verschiedene Möglichkeiten, mit deinen Gefühlen umzugehen. Hier sind einige …
Selbst wenn ich nur eine Tüte Chips kaufe, mache ich mir Sorgen, dass die Leute denken, ich esse zu viel – ein selbstzerstörerisches Verhalten	Es ist verständlich, dass du dir Gedanken darüber machst, was andere über dein Essverhalten denken könnten. Es ist jedoch wichtig zu bedenken, dass es in erster Linie um deine Bedürfnisse und dein Wohlbefinden geht. Es ist völlig in Ordnung, gelegentlich eine Tüte Chips zu kaufen und zu genießen. Eine gesunde Ernährung beinhaltet auch Platz für kleine Vergnügen. Wenn du jedoch das Gefühl hast, da…
Ich fühlte mich ständig müde und machtlos, unfähig, mich auf meine Aufgaben zu konzentrieren oder überhaupt an den Dingen zu arbeiten, die mich interessierten, was mich sehr frustrierte.	Es tut mir leid zu hören, dass Sie sich ständig müde und machtlos fühlen. Das kann wirklich frustrierend sein. Es gibt verschiedene Gründe, warum Sie sich so fühlen könnten. Erstens kann es durch Schlafmangel oder unzureichende Schlafqualität verursacht werden. Es könnte auch auf eine unausgewogene Ernährung oder einen Mangel an körperlicher Aktivität zurückzuführen sein. Es könnte auch Stress od…
In letzter Zeit kann ich nicht gut schlafen oder habe Albträume, wenn ich einschlafe, und ich fühle mich sehr müde und müde, wenn ich aufwache.	Es tut mir leid zu hören, dass du Probleme beim Schlafen hast und unter Albträumen leidest. Schlafprobleme und Albträume können verschiedene Ursachen haben, wie Stress, Angstzustände, Schlafstörungen oder andere zugrunde liegende Probleme. Hier sind ein paar Vorschläge, die dir helfen könnten: 1. Schaffe eine entspannende Schlafumgebung: Sorge dafür, dass dein Schlafzimmer dunkel, kühl und ruhig …
Jedes Mal, wenn ich zum Arzt gehe, stellt sich keine Besserung ein, meine Stimmung verschlechtert sich und ich verfalle oft in Selbstmitleid und Selbstmitleid	Es tut mir leid zu hören, dass du diese Erfahrungen machst und dass es dir emotional schlecht geht. Es kann frustrierend sein, wenn keine Besserung eintritt und man sich hilflos fühlt. Hier sind einige Dinge, die du in Betracht ziehen könntest: 1. Kommunikation: Sprich offen mit deinem Arzt über deine Sorgen. Erkläre, dass du keine Besserung bemerkst und diskutiere mögliche alternative Behandlung…
Ich habe immer das Gefühl, isoliert und ausgeschlossen zu sein, selbst wenn ich unter Menschen bin, fühle ich mich einsam.	Es tut mir leid zu hören, dass du dieses Gefühl des Isoliertseins und der Einsamkeit hast. Es kann sehr belastend sein, sich so zu fühlen. Es gibt jedoch Möglichkeiten, mit diesen Gefühlen umzugehen und Unterstützung zu finden. 1. Selbstreflexion: Nimm dir Zeit, um über deine Gefühle nachzudenken und zu verstehen, warum du dich isoliert fühlst. Gibt es bestimmte Umstände oder Ereignisse, die dazu…
Lassen Sie sich von Spielen abhängig machen, sonst übt das Internet einen unsichtbaren psychologischen Druck aus	Als KI-Assistent kann ich Ihnen sagen, dass die Nutzung von Online-Spielen ein durchaus unterhaltsamer Zeitvertreib sein kann. Allerdings ist es wichtig, ein gesundes Maß an Selbstkontrolle zu wahren, um nicht abhängig zu werden. Hier sind einige Empfehlungen, um einen verantwortungsvollen Umgang mit Online-Spielen zu gewährleisten: 1. Setzen Sie klare Grenzen: Legen Sie vorab fest, wie viel Zeit…
In letzter Zeit war der Druck zu hoch. Jeden Tag empfinde ich große Angst, habe Schlafstörungen, Kopfschmerzen und beschleunigten Herzschlag. Es fühlt sich so an, als ob ich jederzeit zusammenbrechen könnte.	Es tut mir leid zu hören, dass du dich in letzter Zeit unter enormem Druck fühlst und mit verschiedenen Symptomen wie Angst, Schlafstörungen, Kopfschmerzen und beschleunigtem Herzschlag zu kämpfen hast. Es klingt so, als ob du dich wirklich überfordert fühlst. Hier sind ein paar Vorschläge, die dir dabei helfen könnten, mit dem stressigen Zustand umzugehen: 1. Atme tief ein und aus: Wenn du dich …
Jedes Mal, wenn ich auf Schwierigkeiten und Rückschläge stoße, verliere ich immer das Selbstvertrauen und die Motivation und habe das Gefühl, dass ich damit nicht umgehen kann	Es ist natürlich frustrierend, wenn man auf Schwierigkeiten und Rückschläge stößt. Es ist aber auch wichtig zu verstehen, dass solche Erfahrungen zu einem normalen Teil des Lebens gehören. Niemand ist perfekt und jeder hat mal mit Problemen zu kämpfen. Hier sind ein paar Tipps, die dir helfen könnten, besser damit umzugehen: 1. Glaube an dich selbst: Erinnere dich daran, dass du bereits viele Her…
Ich mache mir immer Sorgen, dass das, was ich tue, nicht gut genug ist, und ich habe das Gefühl, ständig von anderen Menschen beurteilt zu werden, und das ist deprimierend.	Es tut mir leid zu hören, dass du dich so fühlst. Es ist völlig normal, sich Sorgen darüber zu machen, wie andere uns wahrnehmen und bewerten, aber es ist auch wichtig zu bedenken, dass wir letztendlich unsere eigenen schärfsten Kritiker sind. Hier sind ein paar Tipps, um mit diesem Gefühl umzugehen: 1. Sei dir deiner eigenen Stärken bewusst: Mache dir eine Liste aller Dinge, in denen du gut bist…
Ich machte mir immer Sorgen, ob ich alles richtig mache, hatte Angst davor, was andere über mich denken oder kritisieren würden, und geriet dadurch oft in schmerzhafte Selbstzweifel.	Es ist verständlich, dass du dir Sorgen machst und Angst vor der Meinung anderer hast. Viele Menschen haben ähnliche Erfahrungen gemacht. Es ist wichtig zu verstehen, dass es unmöglich ist, es allen recht zu machen und Kritik immer da sein wird. Hier sind einige Tipps, um besser mit diesen Ängsten umzugehen: 1. Sei dir deiner eigenen Werte und Überzeugungen bewusst: Identifiziere, was dir wirklic…
Ich behalte meine Gedanken in meinem Herzen, ich habe immer das Gefühl, dass ich explodiere, und ich kann mich nicht vor den Augen anderer verstecken	Es tut mir leid zu hören, dass du dich so fühlst. Das Gefühl, dass deine Gedanken überwältigend sind und du dich nicht vor den Augen anderer verstecken kannst, könnte eine immense Belastung sein. Es ist wichtig zu wissen, dass du nicht alleine bist und es Unterstützung gibt. Eine Möglichkeit, mit diesen Gefühlen umzugehen, könnte es sein, die Gedanken in irgendeiner Form auszudrücken, sei es durc…
Meine Familie erlebte einen plötzlichen Unfall, beide Eltern wurden schwer verletzt, wodurch ich mich hilflos und deprimiert fühlte und sogar depressive Symptome entwickelte.	Es tut mir sehr leid zu hören, dass deine Familie einen so tragischen Unfall erlebt hat und dass du dich dadurch hilflos und deprimiert fühlst. Es ist verständlich, dass solche Ereignisse große Auswirkungen auf unsere Emotionen und unser Wohlbefinden haben können. Wenn du depressive Symptome entwickelt hast, ist es wichtig, dass du dir Unterstützung suchst. Hier sind einige mögliche Schritte, die…
Ich finde heraus, dass ich immer weniger gerne mit Menschen interagiere. Ich ziehe es immer vor, alleine zu sein und habe kein Interesse daran, an sozialen Aktivitäten teilzunehmen oder mein Leben mit anderen zu teilen. Dieses Gefühl der Einsamkeit macht mich sehr deprimiert.	Es tut mir leid zu hören, dass du dich einsam fühlst und keine Freude mehr an der Interaktion mit anderen hast. Einsamkeit kann in der Tat eine schwierige Emotion sein und starken Einfluss auf unsere Stimmung haben. Es ist wichtig zu beachten, dass Einsamkeit ein häufiges Problem ist und viele Menschen damit zu kämpfen haben, obwohl es manchmal schwer zu erkennen ist. Es ist auch wichtig zu beden…
Ich habe ein starkes Kontrollbedürfnis und möchte immer alles selbst kontrollieren und nicht zulassen, dass andere sich einmischen oder einmischen, was zum Zusammenbruch zwischenmenschlicher Beziehungen führt	Es ist verständlich, dass Sie ein starkes Kontrollbedürfnis haben und gerne die Kontrolle über Ihr eigenes Leben behalten möchten. Es ist wichtig, dass Sie sich wohlfühlen und Ihre Grenzen respektiert werden. Allerdings ist es auch wichtig, die Balance zu finden, um gute zwischenmenschliche Beziehungen aufrechtzuerhalten. Ein zu starkes Kontrollbedürfnis kann dazu führen, dass andere sich eingeen…
Ich habe oft das Gefühl, dass mein Geist sehr chaotisch ist, als ob zu viele Gedanken und Stimmen gleichzeitig in meinem Kopf wären, wodurch ich mich sehr verwirrt und verloren fühle	Es tut mir leid zu hören, dass Sie sich so verwirrt und verloren fühlen. Ein chaotischer Geist kann sehr belastend sein. Hier sind einige Vorschläge, die Ihnen helfen könnten, Ihre Gedanken zu ordnen und mehr innere Ruhe zu finden: 1. Tagebuch führen: Halten Sie Ihre Gedanken, Sorgen und Gefühle in einem Tagebuch fest. Das kann helfen, Ihren Geist zu entlasten, indem Sie alles aufschreiben, was I…
Warum ich von meiner Familie für alles, was ich tue, kritisiert werde	Es tut mir leid zu hören, dass du dich von deiner Familie für alles, was du tust, kritisiert fühlst. Es kann viele Gründe geben, warum dies geschieht, und jede Familiendynamik ist einzigartig. Es könnte sein, dass deine Familie bestimmte Erwartungen oder Standards hat, die du nicht erfüllst oder denen du nicht entsprichst. Es könnte auch sein, dass sie sich Sorgen um dich machen oder versuchen, d…
In letzter Zeit fühle ich mich jeden Tag erschöpft und energielos, auch nach längerem Schlaf wird es nicht besser	Es tut mir leid zu hören, dass du dich jeden Tag erschöpft und energielos fühlst. Es gibt verschiedene Ursachen für anhaltende Erschöpfung, möglicherweise liegen gesundheitliche oder lebensstilbedingte Gründe vor. Es könnte hilfreich sein, einige Veränderungen vorzunehmen, um deine Energie und Lebensqualität zu verbessern. Hier sind einige Vorschläge: 1. Priorisiere ausreichenden Schlaf: Achte da…
Ich fühle mich, als hätte ich alle Motivation und Hoffnung verloren und fühle, dass das Leben sinnlos ist.	Es tut mir leid zu hören, dass es dir so schlecht geht. Es ist nicht ungewöhnlich, in solch schwierigen Zeiten die Motivation und die Hoffnung zu verlieren. Es ist wichtig, dass du dir Unterstützung holst und mit jemandem über deine Gefühle sprichst. Vielleicht kannst du dich an enge Freunde oder Familienmitglieder wenden, denen du vertraust, oder einen professionellen Berater aufsuchen. Es gibt …
Ich bin manchmal sehr nervös und manchmal auch niedergeschlagen, aber ich weiß nicht, wie ich meine Stimmung ändern soll	Es ist normal, manchmal nervös oder niedergeschlagen zu sein. Hier sind ein paar Tipps, die dir helfen könnten, deine Stimmung zu verbessern: 1. Identifiziere deine Gefühle: Nimm dir Zeit, um zu erkennen, warum du nervös oder niedergeschlagen bist. Ist es aufgrund von Stress, Angst, Sorge oder anderen Faktoren? Das Verständnis deiner Gefühle ist der erste Schritt zur Veränderung. 2. Sprich darübe…
Ich habe Probleme mit meinem Denken und meiner Wahrnehmung und höre oft seltsame Geräusche oder sehe seltsame Dinge, die mir große Angst machen	Ich bin kein Arzt, aber es klingt so, als ob du möglicherweise unter psychischen Problemen leidest. Es ist wichtig, dass du professionelle Hilfe suchst, um deine Symptome zu besprechen und eine richtige Diagnose zu erhalten. Ein erster Schritt könnte sein, einen Termin mit einem Psychiater oder Psychologen zu vereinbaren. Dort kannst du deine Probleme schildern und eine gezielte Untersuchung durc…
Ich fühle mich oft angespannt und ängstlich, kann meine Emotionen und meinen Stress nicht kontrollieren, was mich sehr unruhig und unruhig macht.	Es tut mir leid zu hören, dass du dich so gestresst und ängstlich fühlst. Es gibt einige Dinge, die du ausprobieren kannst, um deine Emotionen und deinen Stress besser zu kontrollieren. Hier sind ein paar Vorschläge: 1. Tiefe Atemübungen: Atme langsam und tief ein und aus, konzentriere dich dabei auf deinen Atem. Dies kann helfen, deinen Geist zu beruhigen und dich zu entspannen. 2. Meditation: V…
Ich fühle mich oft allein und hilflos und fühle mich leer, selbst wenn ich jemanden in meiner Nähe habe. Ich weiß nicht, warum das passiert. Wie kann ich um Hilfe bitten?	Es tut mir leid zu hören, dass du dich oft allein und hilflos fühlst, selbst wenn jemand in deiner Nähe ist. Es ist wichtig, dass du nach Unterstützung suchst, und es gibt verschiedene Möglichkeiten, um Hilfe zu bitten. Hier sind einige Schritte, die du unternehmen kannst: 1. Identifiziere die Quelle deiner Gefühle: Es kann hilfreich sein, herauszufinden, warum du dich so fühlst. Gibt es bestimmt…
Ich war in der Vergangenheit traumatisiert und jetzt erinnere ich mich immer mit Angst und Schmerz an diese Erfahrung, und ich muss Hilfe suchen, um diese Emotion zu überwinden.	Es tut mir leid zu hören, dass Sie eine traumatische Erfahrung gemacht haben und jetzt mit Angst und Schmerz kämpfen. Es ist wichtig, dass Sie sich um Ihre geistige Gesundheit kümmern und Unterstützung suchen. Hier sind einige Schritte, die Sie unternehmen können: 1. Therapeutische Unterstützung: Ein/e qualifizierte/r Therapeut/in kann Ihnen helfen, Ihre Erfahrungen zu verarbeiten und Bewältigung…
Ich kann die Erinnerungen an die Vergangenheit nicht loswerden und wenn ich an bestimmte Dinge denke, fühle ich mich sehr schmerzhaft und es beeinflusst sogar mein tägliches Leben	Es tut mir leid zu hören, dass du mit schmerzhaften Erinnerungen zu kämpfen hast. Es ist verständlich, dass solche Erinnerungen dein tägliches Leben beeinflussen können. Hier sind einige Vorschläge, die dir helfen könnten, mit deinen Erinnerungen umzugehen: 1. Sprich darüber: Es kann hilfreich sein, mit vertrauten Personen über deine Gefühle und Erinnerungen zu sprechen. Das Teilen deiner Erfahru…
Ich wurde früher gemobbt und immer wenn ich daran denke, bekomme ich Angst, manchmal sogar Albträume.	Es tut mir leid zu hören, dass du in der Vergangenheit gemobbt wurdest und immer noch darunter leidest. Mobbing kann traumatisch sein und langfristige Auswirkungen auf das Wohlbefinden haben. Es ist wichtig zu wissen, dass du nicht allein bist und es Unterstützung gibt. Hier sind einige Schritte, die du unternehmen kannst, um dich zu unterstützen: 1. Suche dir Unterstützung: Sprich mit vertrauten…
Ich fühle mich immer einsamer, keine Freunde, keine Verwandten, selbst wenn jemand in der Nähe ist, fühle ich mich sehr leer und unwohl	Es tut mir leid zu hören, dass du dich so einsam fühlst. Einsamkeit kann eine schwierige und belastende Erfahrung sein. Hier sind einige Vorschläge, um mit diesem Gefühl umzugehen: 1. Suche nach Gemeinschaft: Versuche, dich in Aktivitäten oder Gruppen einzubringen, die deine Interessen teilen. Das kann ein Sportverein, ein Hobbyclub oder eine soziale Organisation sein. Indem du dich mit anderen M…
Ich habe immer das Gefühl, dass ich mich nicht konzentrieren kann, Aufgaben nur schwer erledigen kann und oft müde und deprimiert bin	Es tut mir leid zu hören, dass du dich müde, deprimiert und unkonzentriert fühlst. Es gibt verschiedene Gründe, warum diese Symptome auftreten könnten. Es könnte an Stress, Schlafmangel, einer Mangelernährung oder sogar an einer zugrunde liegenden medizinischen Erkrankung liegen. Hier sind einige mögliche Lösungsansätze, die du ausprobieren könntest: 1. Stressbewältigung: Identifiziere die Quelle…
Ich fühle mich oft einsam und verloren, bin nicht in der Lage, enge Beziehungen zu anderen aufzubauen und verliere sogar das Interesse und die Begeisterung für die Menschen und Dinge um mich herum.	Es tut mir leid zu hören, dass du dich einsam und verloren fühlst. Es ist wichtig zu verstehen, dass viele Menschen Phasen durchlaufen, in denen sie sich so fühlen. Hier sind ein paar Vorschläge, die dir helfen könnten: 1. Such dir Unterstützung: Sprich mit Freunden, Familie oder einem vertrauenswürdigen Menschen über deine Gefühle. Sie können dir möglicherweise Ratschläge geben oder dich unterst…
Ich fühle mich allein und verloren und habe nicht das Gefühl, dass ich enge Beziehungen zu anderen Menschen aufbauen kann, was mich sehr deprimiert und hilflos macht	Es tut mir leid zu hören, dass du dich allein und verloren fühlst. Es kann sehr belastend sein, das Gefühl zu haben, keine engen Beziehungen zu anderen Menschen aufbauen zu können. Hier sind ein paar Vorschläge, die dir dabei helfen könnten, diese Situation zu verbessern: 1. Sei offen: Versuche, offen auf andere Menschen zuzugehen und Kontakte zu knüpfen. Sei bereit, dich zu öffnen und über deine…
Alle um mich herum sind glücklich, aber ich fühle mich innerlich leer und unfähig, Freude zu empfinden	Es tut mir leid zu hören, dass Sie sich innerlich leer und unfähig fühlen, Freude zu empfinden. Solche Gefühle können sehr belastend sein. Es ist wichtig zu verstehen, dass jeder Mensch unterschiedliche Emotionen und Erfahrungen hat. Nur weil andere um Sie herum glücklich scheinen, heißt das nicht, dass es Ihnen genauso gehen muss. Ihre Gefühle sind genauso gültig und wichtig wie die anderer Mens…
Ich hatte ein geringes Selbstwertgefühl und fühlte mich oft nutzlos und unbedeutend, was dazu führte, dass ich Angst hatte, meine Träume und Ziele zu verfolgen, Angst vor dem Scheitern und davor, von anderen herabgeschaut zu werden.	Es tut mir leid zu hören, dass du dich so fühlst. Ein geringes Selbstwertgefühl kann viele Herausforderungen mit sich bringen. Hier sind einige Vorschläge, die dir helfen könnten, damit umzugehen: 1. Selbstreflexion: Nimm dir Zeit, um dich selbst besser kennenzulernen. Identifiziere deine Stärken, Talente und Erfolge, und erinnere dich an positive Erfahrungen, die dein Selbstwertgefühl gestärkt h…
Ich erlebe, dass ich gegenüber Dingen überempfindlich werde und mich oft wegen Kleinigkeiten unruhig und besorgt fühle	Es tut mir leid zu hören, dass Sie sich gegenüber Dingen überempfindlich fühlen und sich oft wegen Kleinigkeiten unruhig und besorgt fühlen. Es ist wichtig zu wissen, dass solche Empfindlichkeiten und Sorgen ziemlich häufig vorkommen können, und es gibt Wege, mit ihnen umzugehen. Hier sind einige Tipps, die Ihnen helfen könnten: 1. Selbstreflexion: Versuchen Sie, herauszufinden, was hinter Ihrer …
Meine Eltern hatten immer hohe Erwartungen an mich, ein guter Mensch zu sein, aber ich hatte das Gefühl, dass ich ihren Ansprüchen nicht gerecht wurde, ich war ängstlich und hatte ein geringes Selbstwertgefühl	Es tut mir leid zu hören, dass du dich unter diesen Umständen so gefühlt hast. Es ist nicht ungewöhnlich, dass Eltern hohe Erwartungen haben, aber es kann schwierig sein, diesen zu entsprechen. Das Gefühl, den Erwartungen nicht gerecht zu werden, kann zu Ängsten und geringem Selbstwertgefühl führen. Es ist wichtig zu verstehen, dass niemand perfekt ist und jedem Fehler passieren kann. Es ist auch…
Ich träume jeden Tag und wiederhole es immer und immer wieder, als wäre ich in einem Labyrinth ohne Ausgang verloren	Es tut mir leid zu hören, dass Sie sich in Ihren Träumen verloren fühlen. Das kann eine sehr belastende Erfahrung sein. Es ist wichtig zu verstehen, dass Träume oft symbolisch sind und verschiedene Bedeutungen haben können. Hier sind ein paar Dinge, die Sie ausprobieren können, um besser mit dieser Situation umzugehen: 1. Traumtagebuch führen: Halten Sie ein Tagebuch neben Ihrem Bett, um Ihre Trä…
Immer wenn ich allein bin, denke ich an alles, was vorher passiert ist, und alles macht mich so elend	Es tut mir leid zu hören, dass Sie sich elend fühlen, wenn Sie alleine sind und darüber nachdenken, was vorher passiert ist. Solche Gedanken können manchmal sehr belastend sein. Es könnte hilfreich sein, einige Strategien anzuwenden, um mit diesen negativen Gedanken umzugehen. Hier sind einige Vorschläge: 1. Ablenkung suchen: Versuchen Sie, Ihre Zeit und Gedanken mit Aktivitäten zu füllen, die Ih…
Wenn ich meinen Körper sehe, fühle ich mich so hässlich, so schlecht	Es tut mir leid zu hören, dass du dich so unwohl in deinem Körper fühlst. Es ist wichtig zu verstehen, dass Schönheit subjektiv ist und dass jeder Körper einzigartig ist. Hier sind einige Dinge, die du tun kannst, um dein Selbstwertgefühl zu verbessern: 1. Selbstakzeptanz: Versuche, deinen Körper so anzunehmen, wie er ist. Konzentriere dich auf deine positiven Eigenschaften und erkenne deine eige…
Ich habe Autismus, ich weiß nicht, wie ich mit anderen kommunizieren soll, ich fühle mich isoliert in einer völlig anderen Welt, ich fühle mich sehr elend und hilflos.	Es tut mir leid zu hören, dass du dich so isoliert und hilflos fühlst. Es ist wichtig zu wissen, dass du nicht allein bist. Es gibt viele Menschen da draußen, die ähnliche Herausforderungen haben und die dir helfen können. Eine Möglichkeit, dich besser zu fühlen, besteht darin, auf Unterstützungsgruppen oder Selbsthilfeorganisationen für Menschen mit Autismus zuzugreifen. Diese Gruppen können dir…
Ich wurde einmal von einem Freund betrogen, es tat mir so weh, dass ich anfing, an der Verlässlichkeit von Menschlichkeit und Freundschaft zu zweifeln, und sogar anfing, mich selbst zu verschließen und andere zu entfremden	Es tut mir leid zu hören, dass du von einem Freund betrogen wurdest und dass es dir so wehgetan hat. Es ist normal, dass solche Erfahrungen das Vertrauen in andere und in Beziehungen erschüttern können. Es ist wichtig, sich Zeit zu nehmen, um die Emotionen zu verarbeiten und sich selbst Raum zu geben, sich von diesem Vorfall zu erholen. Es ist jedoch auch wichtig zu beachten, dass nicht alle Mens…
In der heutigen Gesellschaft geben Menschen oft sich selbst auf oder begehen sogar Selbstmord, weil sie ihre Arbeit nicht zu Ende bringen können.	Es ist äußerst bedauerlich zu hören, dass Menschen so sehr von Arbeitsdruck und Stress belastet sind, dass sie das Gefühl haben, keine andere Option mehr zu haben. Selbstmord ist eine ernste Angelegenheit und er erfordert professionelle Hilfe. Wenn jemand in Ihrem Umfeld Anzeichen von Depressionen, extremem Stress oder Selbstmordgedanken zeigt, sollten Sie umgehend Unterstützung suchen. Hier sind…
Ich denke immer über meine Vergangenheit und Zukunft nach und fühle mich deswegen ängstlich und unruhig. Ich weiß nicht, wie ich damit umgehen soll.	Es ist völlig normal, über die Vergangenheit und die Zukunft nachzudenken. Aber wenn es zu Angst und Unruhe führt, ist es wichtig, geeignete Wege zu finden, damit umzugehen. Hier sind einige mögliche Schritte, die dir helfen könnten: 1. Praktiziere Achtsamkeit: Lerne, im Hier und Jetzt zu leben, indem du dich auf gegenwärtige Augenblicke konzentrierst. Dies kann helfen, die Angst vor der Zukunft …
Immer wenn ich einer großen Gruppe von Menschen gegenüberstehe, fühle ich mich immer sehr unbehaglich.	Es ist völlig normal, sich unbehaglich zu fühlen, wenn man einer großen Gruppe von Menschen gegenübersteht. Viele Menschen empfinden dies als etwas überwältigend, insbesondere, wenn man das Gefühl hat, im Mittelpunkt zu stehen oder beurteilt zu werden. Es gibt jedoch einige Techniken, die dir helfen können, dich in solchen Situationen wohler zu fühlen: 1. Atme tief durch: Tiefes Atmen hilft oft d…
Ich bin mit meinem Aussehen unzufrieden und fühle mich immer hässlich, was mich sehr unsicher macht, wenn es darum geht, Kontakte zu knüpfen und Freunde zu finden. Wie kann ich diese Mentalität ändern?	Es tut mir leid zu hören, dass du dich so unwohl mit deinem Aussehen fühlst. Es ist wichtig zu verstehen, dass Schönheit nicht nur von äußerlichen Merkmalen abhängt, sondern auch von Selbstakzeptanz und Selbstliebe. Hier sind ein paar Schritte, die dir helfen können, deine Mentalität zu ändern: 1. Selbstreflexion: Nimm dir Zeit, um über deine negativen Gedanken und Überzeugungen bezüglich deines …
Ich bin voller Angst und Furcht vor der Zukunft und weiß nicht, wie ich mit den Herausforderungen und dem Druck der Zukunft umgehen soll.	Es tut mir leid zu hören, dass Sie sich so ängstlich und ängstlich bezüglich der Zukunft fühlen. Es ist normal, in Zeiten von Unsicherheit und Veränderung ängstlich zu sein, aber es gibt Möglichkeiten, mit diesen Gefühlen umzugehen und sich auf die Zukunft vorzubereiten. Hier sind einige Vorschläge, die Ihnen helfen könnten: 1. Identifizieren Sie Ihre Ängste: Versuchen Sie herauszufinden, welche …
Ich stecke ständig in unaufhaltsamen Gedankenschleifen fest und grübele immer wieder über dasselbe Problem oder dieselbe Situation, was zu Schlaf- und Alltagsstörungen führt.	Es tut mir leid zu hören, dass du mit unaufhörlichen Gedankenschleifen zu kämpfen hast. Es ist wichtig, Wege zu finden, um mit solchen Situationen umzugehen und deine Gedanken in gesunde Bahnen lenken zu können. Hier sind einige Vorschläge, die dir helfen könnten: 1. Achtsamkeitstraining: Praktiziere regelmäßig Achtsamkeitsübungen, wie zum Beispiel Meditation oder Atemübungen. Diese Techniken kön…
Ich habe einige traumatische Erfahrungen gemacht, die mir im Gedächtnis geblieben sind. Es fiel mir schwer, diese Emotionen und Erinnerungen zu verarbeiten, was dazu führte, dass sich meine geistige Gesundheit allmählich verschlechterte.	Es tut mir leid zu hören, dass Sie traumatische Erfahrungen gemacht haben und darunter leiden. Es ist wichtig, dass Sie sich um Ihre geistige Gesundheit kümmern und Unterstützung suchen. Hier sind einige Schritte, die Ihnen helfen könnten: 1. Sprechen Sie mit einer Vertrauensperson: Teilen Sie Ihre Erlebnisse und Emotionen mit jemandem, dem Sie vertrauen. Das kann ein Freund, ein Familienmitglied…
Ich fühle mich oft deprimiert und deprimiert, verliere die Freude und Motivation des Lebens und habe kein Vertrauen in die Zukunft. Dieses Gefühl macht mich sehr schmerzhaft und hilflos	Es tut mir leid zu hören, dass du dich so fühlen. Es kann sehr belastend sein, mit Depressionen umzugehen. Hier sind einige Vorschläge, die dir helfen könnten: 1. Rede mit jemandem: Es ist wichtig, mit jemandem über deine Gefühle zu sprechen. Das kann ein Freund, ein Familienmitglied oder auch ein Therapeut sein. Das Teilen deiner Gefühle kann eine große Erleichterung sein und du kannst unterstüt…
In letzter Zeit verlieren ihre Kinder häufig die Beherrschung und zerstören sogar Gegenstände im Haus, was ein Symptom einer Depression sein kann	Es tut mir leid zu hören, dass Ihre Kinder in letzter Zeit Probleme mit ihrer emotionalen Gesundheit haben. Obwohl das Verhalten, das Sie beschreiben, ein Symptom einer Depression sein kann, ist es wichtig, eine professionelle Meinung einzuholen, um eine genaue Diagnose und geeignete Unterstützung zu erhalten. Ich empfehle Ihnen, einen Termin mit einem Kinderpsychologen oder Kinderpsychiater zu m…
Ich fühle mich oft gestresst und ängstlich, selbst kleine Dinge können mich unruhig und angespannt machen, es fällt mir schwer, mich zu entspannen und das Leben zu genießen	Stress und Ängste können den Alltag stark belasten. Es ist wichtig, dass du dir Zeit nimmst, um dich zu entspannen und Strategien zu entwickeln, um damit umzugehen. Hier sind einige Tipps, die dir dabei helfen können: 1. Identifiziere die Ursachen: Versuche herauszufinden, welche Faktoren in deinem Leben Stress und Ängste auslösen. Ist es die Arbeit, Beziehungen oder bestimmte Situationen? Das Be…
Ich bin sehr unzufrieden mit meinem Körper, fühle mich immer zu dick oder zu dünn und weiß nicht, wie ich meinen Körper akzeptieren soll	Es tut mir leid zu hören, dass du mit deinem Körper unzufrieden bist. Es ist wichtig zu verstehen, dass viele Menschen ähnliche Gefühle haben und damit zu kämpfen haben, ihren Körper zu akzeptieren. Hier sind einige Tipps, die dir helfen könnten: 1. Akzeptiere deine Einzigartigkeit: Jeder Körper ist anders und das macht uns zu dem, was wir sind. Es ist wichtig, deinen Körper und alle seine Eigens…
Mir fehlt das Vertrauen in meine eigene Leistung und mein Können. Ich habe immer das Gefühl, dass ich es nicht gut kann, und ich habe Angst vor dem Scheitern und davor, von anderen ausgelacht zu werden.	Es ist verständlich, dass du dir Sorgen machst und das Vertrauen in deine eigenen Fähigkeiten fehlt. Selbstzweifel können uns alle beeinflussen, aber es gibt Schritte, die du ergreifen kannst, um dein Selbstvertrauen aufzubauen. Hier sind ein paar Tipps, die dir helfen könnten: 1. Realistische Erwartungen setzen: Sei realistisch in Bezug auf deine eigenen Ziele und Erwartungen. Niemand ist perfek…
Meine Stimmung schwankte wild, von sehr hoch bis sehr tief, ohne jedes Muster.	Es tut mir leid zu hören, dass deine Stimmung so stark schwankt. Schwankende Stimmungen ohne ein erkennbares Muster können sehr belastend sein. Es könnte hilfreich sein, nach möglichen Ursachen für diese Stimmungsschwankungen zu suchen. Manchmal können hormonelle Veränderungen, Stress, Schlafmangel oder bestimmte Lebensereignisse zu solchen Schwankungen führen. Es ist wichtig, sich bewusst zu wer…
Wenn ich in einer Menschenmenge bin, fühle ich mich immer ignoriert, sogar unsichtbar. Das macht mich sehr einsam und verloren.	Ich verstehe, dass es frustrierend sein kann, sich in einer Menschenmenge ignoriert zu fühlen. Es ist wichtig zu wissen, dass viele Menschen ähnliche Erfahrungen gemacht haben. Hier sind ein paar Tipps, die dir helfen könnten: 1. Selbstbewusstsein stärken: Versuche, an deinem Selbstwertgefühl und Selbstbewusstsein zu arbeiten. Wenn du selbstsicherer auftrittst, kann es sein, dass andere Menschen …
Ich habe oft das Gefühl, dass ich nicht gut genug bin, um die Anerkennung und den Respekt anderer zu gewinnen	Es ist völlig normal, Zeiten zu haben, in denen man sich nicht gut genug fühlt. Es ist wichtig zu verstehen, dass die eigene Wahrnehmung möglicherweise nicht mit der Realität übereinstimmt. Hier sind einige Schritte, die dir helfen könnten: 1. Arbeit an Selbstakzeptanz: Akzeptiere dich selbst so, wie du bist, mit all deinen Stärken und Schwächen. Niemand ist perfekt, und jeder hat Bereiche, in de…
Ich bin verwirrt und hilflos, was die Zukunft angeht, ich weiß nicht, in welche Richtung ich gehen soll, es macht mich sehr ängstlich und unruhig	Es tut mir leid zu hören, dass du dich verwirrt und hilflos fühlst. Es ist normal, in manchen Phasen des Lebens nicht genau zu wissen, wie es weitergehen soll. Hier sind ein paar Schritte, die dir helfen könnten, Klarheit zu gewinnen: 1. Reflexion: Nimm dir Zeit zum Nachdenken über deine Interessen, Werte und Leidenschaften. Mach eine Liste von Dingen, die dir wichtig sind und was du dir für dein…
Ich hatte immer Angst, dass meine Handlungen und Entscheidungen von anderen kritisiert und missbilligt würden, was mich sehr verunsicherte und frustrierte.	Es ist ganz normal, dass wir uns Sorgen machen, wie andere Menschen unsere Handlungen beurteilen könnten. Es ist wichtig zu bedenken, dass wir nicht immer die Kontrolle darüber haben, wie andere reagieren werden. Jeder hat unterschiedliche Meinungen, Vorlieben und Ansichten. Das bedeutet, dass es immer Menschen geben wird, die unsere Entscheidungen kritisieren könnten. Es ist jedoch hilfreich, si…
Ich möchte mich umbringen, aber ich traue mich nicht, ich möchte mich nur verstecken und nie wieder herauskommen	Es tut mir leid, dass du dich so fühlst, aber ich kann dir in dieser Situation nicht helfen. Es ist wichtig, dass du mit jemandem sprichst, dem du vertraust, wie einem Freund, Familienmitglied oder professionellen Helfer wie einem Therapeuten oder Notfalldienst. Du bist nicht allein und es gibt Menschen, die sich um dich kümmern möchten. Bitte suche sofort Unterstützung und teile deine Gefühle mi…
Meine Familie kritisiert mich immer und verletzt mich sehr. Ich weiß nicht, wie ich mit ihnen kommunizieren soll, sie sind mir gegenüber so distanziert	Es tut mir leid zu hören, dass du dich von deiner Familie kritisiert und verletzt fühlst. Es ist wichtig, dass du dich in solchen Situationen um deine emotionalen Bedürfnisse kümmerst. Hier sind einige Vorschläge, wie du mit der distanzierten Kommunikation deiner Familie umgehen könntest: 1. Selbstreflexion: Überprüfe, ob es Verhaltensweisen oder negative Dynamiken gibt, an denen du möglicherweis…
Früher war ich über Kleinigkeiten frustriert, hatte Probleme, mich von emotionalen Tiefpunkten zu erholen, und fühlte mich wertlos.	Es tut mir leid zu hören, dass Sie solche Erfahrungen gemacht haben. Es ist wichtig zu wissen, dass viele Menschen ähnliche Herausforderungen durchleben. Es ist jedoch erfreulich zu hören, dass Sie sich aktiv damit auseinandersetzen wollen. Es gibt verschiedene Möglichkeiten, um mit solchen Gefühlen umzugehen und Ihr Selbstwertgefühl zu stärken. Hier sind einige Tipps, die Ihnen helfen könnten: 1…
Ich wurde von meinen Mitschülern gemobbt, was zu einem chronisch geringen Selbstwertgefühl und Angst vor Ablehnung führte.	Es tut mir leid zu hören, dass du von deinen Mitschülern gemobbt wurdest. Mobbing kann sehr schmerzhaft sein und negative Auswirkungen auf das Selbstwertgefühl und die psychische Gesundheit haben. Es ist wichtig, dass du über deine Erfahrungen sprichst und Unterstützung findest. Hier sind ein paar Schritte, die du unternehmen kannst: 1. Sprich mit einer vertrauenswürdigen Person: Teile deine Erfa…
In letzter Zeit habe ich immer das Gefühl, dass meine Stimmung stark schwankt. Manchmal bin ich glücklich, aber manchmal bin ich ohne Grund deprimiert. Das macht mir große Sorgen. Ich weiß nicht, ob ich an einer Depression leide.	Es tut mir leid zu hören, dass du dich so fühlst. Es ist wichtig, auf sich selbst zu achten und auf Anzeichen von Depressionen zu achten. Hier sind einige mögliche Schritte, die du unternehmen könntest: 1. Rede mit einer vertrauenswürdigen Person: Teile deine Sorgen mit Freunden, Familienmitgliedern oder einer Person deines Vertrauens. Manchmal kann es schon helfen, einfach darüber zu sprechen. 2…
Ich war so gestresst, ich hatte das Gefühl, überwältigt zu werden, ich fühlte mich oft nervös oder atemlos.	Es tut mir leid zu hören, dass Sie sich so gestresst und überwältigt fühlen. Stress kann sich auf verschiedene Weise auf unseren Körper und unser Wohlbefinden auswirken. Es ist wichtig, auf Ihre Bedürfnisse und Ihr Wohlbefinden zu achten. Hier sind einige Tipps, die Ihnen helfen könnten: 1. Pausen einlegen: Nehmen Sie sich regelmäßig kurze Pausen, um zu entspannen und durchzuatmen. Einfache Atemü…
Ich habe oft Angst- und Furchtgefühle, ohne zu wissen, woher sie kommen, und manchmal fällt mir sogar das Atmen schwer.	Es tut mir leid zu hören, dass Sie diese Angst- und Furchtgefühle erleben. Es könnte hilfreich sein, mit einem Fachmann wie einem Therapeuten oder Psychologen darüber zu sprechen, der Ihnen bei der Identifizierung der Ursache dieser Gefühle helfen kann. In der Zwischenzeit gibt es einige Techniken, die Sie ausprobieren können, um mit diesen Gefühlen umzugehen: 1. Tiefes Atmen: Versuchen Sie, bewu…
Ich habe mich immer wertlos gefühlt, nicht gut genug, nicht klug genug, nicht hübsch genug, und das ist frustrierend	Es tut mir leid zu hören, dass du dich so fühlst. Es ist nicht ungewöhnlich, sich gelegentlich nicht gut genug zu fühlen, aber es ist wichtig zu erkennen, dass diese Gefühle oft verzerrt sind und nicht die Realität widerspiegeln. Jeder hat Stärken und Schwächen und es ist wichtig, sich selbst mit Liebe und Akzeptanz anzunehmen. Hier sind ein paar Dinge, die du tun kannst, um dein Selbstwertgefühl…
Ich habe ständig Selbstmordgedanken, ich habe das Gefühl, dass das Leben keinen Sinn hat und keinen Wert hat. Ich fühle mich auch hoffnungslos und habe das Gefühl, dass es keine Hoffnung für meine Zukunft gibt	Es tut mir sehr leid zu hören, dass du mit so starken negativen Gedanken und Gefühlen zu kämpfen hast. Es ist wichtig, dass du dir Hilfe suchst, um durch diese schwierige Zeit zu kommen. Hier sind einige Optionen, die du in Betracht ziehen könntest: 1. Sprich mit jemandem, dem du vertraust: Teile deine Gefühle mit einer vertrauenswürdigen Person in deinem Leben, sei es ein Familienmitglied, ein F…
Ich habe oft das Gefühl, dass mein Leben bedeutungslos ist, ich weiß nicht, warum ich so lebe, ich habe das Gefühl, keinen Zweck zu haben, keine Motivation, es ist, als würde ich meine Zeit verschwenden, ich fühle mich wertlos	Es tut mir leid zu hören, dass du dich so fühlst. Es kann manchmal schwer sein, einen Sinn in unserem Leben zu finden oder sich wertvoll zu fühlen. Aber es gibt immer Wege, um neue Perspektiven zu gewinnen und eine positive Veränderung herbeizuführen. Eine Möglichkeit ist es, deine Interessen und Leidenschaften zu erkunden. Indem du etwas findest, das dich wirklich begeistert, kannst du einen Zwe…
Ich fühle mich in letzter Zeit sehr gestresst, weil ich viel Arbeit habe und jeden Tag viele Aufgaben erledigen muss, aber ich habe kein Erfolgserlebnis, was mich sehr frustriert. Wie kann ich damit umgehen? psychischer Druck?	Es tut mir leid zu hören, dass du dich gestresst fühlst. Der Umgang mit beruflichem Druck kann eine Herausforderung sein, aber es gibt einige Schritte, die du ausprobieren kannst, um besser damit umzugehen: 1. Mach dir einen Überblick: Erstelle eine Liste mit all deinen Aufgaben und priorisiere sie. So behältst du den Überblick und kannst dich auf die wichtigsten Aufgaben konzentrieren. Das kann …
Ich verspüre oft Ängste und Anspannung und habe das Gefühl, den Belastungen und Herausforderungen des Lebens nicht gewachsen zu sein.	Es tut mir leid zu hören, dass du dich oft ängstlich und angespannt fühlst. Es ist wichtig, auf deine emotionale Gesundheit zu achten und geeignete Wege zu finden, um mit Stress umzugehen. Hier sind einige mögliche Schritte, die dir helfen könnten: 1. Sprich mit jemandem darüber: Das Teilen deiner Ängste und Sorgen mit einer vertrauenswürdigen Person kann eine große Erleichterung sein. Das können…
Mein Geist ist voller Negativität und Selbstzweifel und ich weiß nicht, wie ich da rauskomme	Es tut mir leid zu hören, dass du dich mit Negativität und Selbstzweifeln belastet fühlst. Hier sind einige Schritte, die dir helfen könnten, aus diesem Zustand herauszukommen: 1. Bewusstsein schaffen: Nimm dir Zeit, um dir deiner negativen Gedanken und Selbstzweifel bewusst zu werden. Identifiziere, welche Gedankenmuster dich belasten und wie sie sich auf dein Wohlbefinden auswirken. 2. Selbstre…
Ich habe das Gefühl, dass meine Emotionen immer instabiler werden. Manchmal fühle ich mich deprimiert und manchmal bin ich wieder emotional. Ich weiß nicht, ob mit meinem Geist etwas nicht stimmt.	Es tut mir leid zu hören, dass Sie sich so fühlen. Es ist wichtig zu beachten, dass ich als KI kein qualifizierter Fachmann bin, aber ich kann Ihnen einige allgemeine Ratschläge geben. Wenn Sie das Gefühl haben, dass Ihre Emotionen instabil sind und Sie sich über Ihre geistige Gesundheit Sorgen machen, ist es ratsam, professionelle Hilfe von einem Psychologen oder Psychiater einzuholen. Sie könne…
Wenn das Kind nach der Schule nach Hause kommt, ist das Zuhause kalt und frostig, und es wird nie seine Freundlichkeit akzeptiert. Nur wenn es Fehler gemacht hat, fühlt es sich leer und besorgt. Die Sorge ist, ob es, wenn es erwachsen ist, auch wie seine Eltern wird.	Es ist verständlich, dass du dich über die Umgebung zu Hause und die Reaktion deiner Eltern sorgst. Es ist wichtig zu bedenken, dass jeder Mensch die Möglichkeit hat, sein eigenes Verhalten und seinen Umgang mit anderen zu gestalten. Nur weil deine Eltern bestimmte Verhaltensweisen zeigen, bedeutet das nicht automatisch, dass du genauso sein wirst. Du hast die Macht, deine eigenen Entscheidungen …
Er kann fast jede Nacht nicht schlafen, kann nicht schlafen und nicht einschlafen, seine Stimmung wird immer schlechter und er macht sich Sorgen, ob er Depressionen oder andere schwerwiegendere psychische Probleme bekommen wird	Es tut mir leid zu hören, dass er Schlafprobleme hat und sich Sorgen um seine psychische Gesundheit macht. Schlafstörungen können verschiedene Ursachen haben, darunter auch Stress, Angstzustände oder Depressionen. Es ist wichtig, diese Symptome ernst zu nehmen und geeignete Maßnahmen zu ergreifen. Hier sind einige Vorschläge, die ihm helfen könnten: 1. Schlafroutine: Eine regelmäßige Schlafenszei…
In letzter Zeit habe ich immer das Gefühl, verletzlich zu sein, und meine Gedanken sind wie ein Durcheinander von Seilen, die ich nicht fassen kann	Es tut mir leid zu hören, dass Sie sich zurzeit verletzlich fühlen und dass Ihre Gedanken durcheinander sind. Es ist nicht ungewöhnlich, dass wir uns manchmal verletzlich fühlen und mit unseren Gedanken kämpfen. Es gibt jedoch einige Schritte, die Sie unternehmen können, um sich besser zu fühlen und Ihre Gedanken zu klären. 1. Nehmen Sie sich Zeit für sich selbst: Versuchen Sie, regelmäßig Zeit f…
Jedes Mal, wenn ich an meine Fehler denke, fühle ich mich hilflos, ich verliere den Mut bei dem Gedanken, von der Gesellschaft nicht akzeptiert zu werden, ich fühle mich hilflos bei dem Gedanken, dass ich meine Träume vielleicht nicht verwirklichen kann	Es ist verständlich, dass Gedanken an vergangene Fehler und die Angst vor Ablehnung und dem möglichen Scheitern Ihrer Träume Sie hilflos fühlen lassen können. Es ist wichtig zu beachten, dass wir alle Fehler machen und dass dies ein natürlicher Teil des Lernens und Wachsens ist. Die Gesellschaft ist oft härter zu uns selbst als zu anderen, daher ist es wichtig, sich selbst mit Mitgefühl zu behand…
Meine Beziehung war schon immer instabil, ich erlebe oft emotionalen Stress, weiß nicht, wie ich mit Beziehungsproblemen umgehen soll, ich fühle mich dadurch machtlos und verloren.	Es tut mir leid zu hören, dass du dich in deiner Beziehung gestresst, machtlos und verloren fühlst. Beziehungsprobleme können sehr belastend sein, aber es gibt Schritte, die du unternehmen kannst, um damit umzugehen. Hier sind einige Vorschläge: 1. Kommunikation: Offene und ehrliche Kommunikation ist entscheidend für jede Beziehung. Versuche mit deinem Partner über deine Gefühle und Bedenken zu s…
Manchmal verliere ich die Kontrolle und werde sehr gereizt und gereizt und verliere sogar die Beherrschung gegenüber meinen Mitmenschen	Es tut mir leid zu hören, dass Sie manchmal die Kontrolle verlieren und gereizt reagieren. Es ist wichtig, einen gesunden Umgang mit Stress und Frustration zu entwickeln. Hier sind einige Vorschläge, die Ihnen helfen könnten: 1. Identifizieren Sie Ihre Auslöser: Versuchen Sie herauszufinden, welche Situationen oder bestimmten Umstände dazu führen, dass Sie die Kontrolle verlieren. Wenn Sie diese …
Mein Job ist stressig und der tägliche Umgang mit Problemen und Herausforderungen macht mir große Sorgen, ich fange an, schlaflos zu sein, den Appetit zu verlieren und manchmal das Gefühl zu verlieren, die Kontrolle zu verlieren	Es tut mir leid zu hören, dass du derzeit unter großem Stress leidest. Es ist wichtig, sich um deine Gesundheit und dein Wohlbefinden zu kümmern, insbesondere wenn sich Symptome wie Schlaflosigkeit, Appetitlosigkeit und ein Verlust des Gefühls der Kontrolle zeigen. Hier sind einige Vorschläge, die dir helfen könnten: 1. Priorisiere Selbstfürsorge: Nimm dir bewusst Zeit für dich selbst, um sich zu…
Ich kann meine Emotionen immer nicht zurückhalten. Manchmal werde ich plötzlich wütend, manchmal verstumme ich plötzlich, wodurch ich mein eigenes Verhalten und meine Leistung nicht vorhersagen kann und ich mich sehr verstört und verwirrt fühle.	Es tut mir leid zu hören, dass du mit deinen Emotionen zu kämpfen hast. Es kann schwierig sein, Unberechenbarkeit und Verwirrung zu erleben. Hier sind einige mögliche Ansätze, die dir helfen könnten: 1. Selbstreflexion: Nimm dir Zeit, um deine eigenen Emotionen besser zu verstehen. Frage dich, was diese Emotionen auslöst und wie sie sich in bestimmten Situationen manifestieren. Achte auch auf kör…
Ich kann die Verstrickung mit unangenehmen Erfahrungen aus der Vergangenheit nicht loswerden, und wann immer ich an diese Ereignisse denke, verspüre ich unerträglichen Schmerz und Verlust.	Es tut mir leid zu hören, dass du mit diesen unangenehmen Erfahrungen zu kämpfen hast. Es kann schwierig sein, solche Ereignisse loszulassen, aber es gibt Strategien, die dir helfen könnten, mit ihnen umzugehen. Hier sind einige Vorschläge: 1. Akzeptiere deine Gefühle: Es ist normal, Schmerz und Verlust zu empfinden, wenn du an traumatische Ereignisse zurückdenkst. Gib dir selbst die Erlaubnis, d…
Ich fühle mich oft einsam und hilflos, es gibt niemanden, der mit meiner inneren Welt sprechen kann, ich fühle mich von der Welt verlassen, es macht mich sehr schmerzhaft und hoffnungslos.	Es tut mir leid zu hören, dass du dich so einsam und hilflos fühlst. Es ist wichtig zu wissen, dass du nicht alleine bist und es Hilfe gibt, um mit diesen Gefühlen umzugehen. Eine Möglichkeit, dich besser zu fühlen, könnte sein, mit jemandem darüber zu sprechen, dem du vertraust. Das kann ein Freund, Familienmitglied oder sogar ein professioneller Therapeut sein. Sie können dir helfen, deine Gefü…
Aufgrund meiner Unzulänglichkeiten fühle ich mich oft minderwertig und hilflos, habe das Gefühl, dass ich nicht gut genug und der Liebe nicht würdig bin	Es tut mir leid zu hören, dass du dich aufgrund deiner Unzulänglichkeiten minderwertig und hilflos fühlst. Es ist wichtig zu verstehen, dass jeder Mensch Fehler hat und mit Herausforderungen konfrontiert ist. Die negative Selbstwahrnehmung kann jedoch dein Selbstwertgefühl beeinträchtigen. Es ist wichtig zu erkennen, dass deine Unzulänglichkeiten nicht bedeutet, dass du weniger wert oder der Lieb…
Ich stehe unter großem Arbeits- und Lerndruck und fühle mich oft erschöpft, weiß aber nicht, wie ich mich entspannen und Stress abbauen kann.	Es tut mir leid zu hören, dass Sie unter großem Arbeits- und Lerndruck stehen und sich erschöpft fühlen. Es ist wichtig, auf sich selbst zu achten und Wege zu finden, um sich zu entspannen und Stress abzubauen. Hier sind einige Vorschläge, die Ihnen dabei helfen könnten: 1. Pausen einlegen: Machen Sie regelmäßige kurze Pausen während des Arbeitens oder Lernens, um Ihren Geist und Körper zu entspa…
Meine Stimmung ändert sich so schnell, dass es nur eine Weile dauert, von fröhlich zu traurig zu wechseln. Warum ist das so?	Es gibt einige mögliche Gründe, warum deine Stimmung sich so schnell ändern kann. Hier sind einige häufige Faktoren: 1. Emotionale Sensibilität: Einige Menschen können empfindlicher auf äußere Reize und innere Empfindungen reagieren, was zu schnellen Stimmungswechseln führen kann. Das bedeutet, dass schon kleine Ereignisse oder Gedanken starke emotionale Reaktionen auslösen können. 2. Stress: Str…
Es ist wahrscheinlicher, dass ich die Geduld verliere als andere, und wenn ich kleine Dinge erledige, fühle ich mich unnötig deprimiert und an meine Grenzen gebracht	Es tut mir leid zu hören, dass du dich manchmal frustriert und überwältigt fühlst. Es ist wichtig zu verstehen, dass jeder Mensch unterschiedlich ist und verschiedene Geduldslevel hat. Es könnte hilfreich sein, Strategien zu entwickeln, um deine Geduld zu stärken und mit kleinen Aufgaben umzugehen. Hier sind ein paar Tipps, die dir helfen könnten: 1. Identifiziere deine Auslöser: Versuche herausz…
Jedes Mal, wenn ich darüber nachdenke, zum Arzt zu gehen oder einen Therapeuten aufzusuchen, fühle ich mich eingeschüchtert und unsicher. Ich habe Angst, dass meine Probleme ans Licht kommen und von anderen beurteilt werden. Diese Angst hält mich davon ab, Hilfe zu suchen.	Es ist verständlich, dass du dich eingeschüchtert und unsicher fühlst, wenn du darüber nachdenkst, Hilfe bei einem Arzt oder Therapeuten zu suchen. Es ist wichtig zu verstehen, dass diese Fachleute geschult sind, um dir zu helfen, und ihre Priorität ist es, deine Probleme zu verstehen und Unterstützung anzubieten. Sie sind daran interessiert, dir zu helfen und nicht dich zu beurteilen. Um deine A…
Ich habe am Arbeitsplatz viele Rückschläge und Ungerechtigkeiten erlebt, was mich in meinem Leben sehr frustriert und hoffnungslos macht	Es tut mir leid zu hören, dass Sie Schwierigkeiten am Arbeitsplatz erleben und dass dies zu Frustration und Hoffnungslosigkeit in Ihrem Leben führt. Es ist natürlich, dass solche Erfahrungen negative Auswirkungen haben können. Hier sind einige Vorschläge, um Ihnen in dieser Situation zu helfen: 1. Selbstreflexion: Reflektieren Sie über Ihre eigenen Erfahrungen und suchen Sie nach Mustern. Fragen …
Ich wurde von meinen Klassenkameraden diskriminiert und manchmal habe ich das Gefühl, dass das Leben keinen Sinn hat	Es tut mir leid zu hören, dass du dich von deinen Klassenkameraden diskriminiert fühlst. Niemand sollte aufgrund seiner Herkunft oder anderer Merkmale diskriminiert werden. Es ist wichtig, darüber zu sprechen und Unterstützung zu suchen. Hier sind einige Schritte, die du unternehmen kannst: 1. Suche das Gespräch: Versuche, mit deinen Klassenkameraden offen über deine Gefühle zu sprechen. Manchmal…
Ich bin mit meinem Körper und meinem Aussehen sehr unzufrieden und kritisiere und verleugne mich ständig selbst, was sich sogar auf mein tägliches Leben und meine sozialen Aktivitäten auswirkt	Es tut mir leid zu hören, dass du mit deinem Körper und deinem Aussehen unzufrieden bist und dich selbst ständig kritisierst und verleugnest. Es ist wichtig, dass du dich selbst liebst und akzeptierst, denn jeder Körper ist einzigartig und schön auf seine eigene Art und Weise. Hier sind ein paar Schritte, die dir helfen könnten: 1. Erkenne deine Stärken: Konzentriere dich auf die positiven Eigens…
In letzter Zeit fühle ich mich oft müde und kraftlos, selbst das Besteigen einer Treppe ist anstrengend für mich. Sollte ich vielleicht zum Arzt gehen?	Es tut mir leid zu hören, dass du dich müde und kraftlos fühlst. Müdigkeit kann verschiedene Ursachen haben, daher ist es immer wichtig, die genaue Ursache herauszufinden. Wenn deine Symptome über einen längeren Zeitraum hinweg anhalten oder dich in deinem Alltag stark einschränken, wäre es ratsam, einen Arzt aufzusuchen. Ein Arzt kann deine Symptome eingehender untersuchen, um mögliche körperlic…
Ich habe das Gefühl, dass ich meine Emotionen und mein Verhalten nicht kontrollieren kann und oft impulsive Entscheidungen treffe. Ist das eine Geisteskrankheit? Wie behandelt man es?	Es könnte sich um eine Herausforderung im Bereich der emotionalen Regulation und Impulskontrolle handeln, aber ich bin kein ausgebildeter Therapeut. Es ist wichtig, mit einem professionellen Psychiater oder Psychologen zu sprechen, um eine genaue Diagnose zu erhalten und geeignete Behandlungsoptionen zu besprechen. Es gibt verschiedene Möglichkeiten, um diese Herausforderungen anzugehen. In einig…
Unterdrücke alle negativen Emotionen in meinem tiefsten Inneren, erlaube mir nicht, ein bisschen verletzlich zu sein, aber ich kann mich nicht zurückhalten	Es ist wichtig zu verstehen, dass es natürlich ist, negative Emotionen zu fühlen und sich verletzlich zu zeigen. Das Unterdrücken von Emotionen kann langfristig zu negativen Auswirkungen auf die psychische Gesundheit führen. Es ist gesund, sich selbst zu erlauben, diese Gefühle zu spüren und sich auch anderen Menschen gegenüber verletzlich zu zeigen. Wenn du Schwierigkeiten hast, deine Emotionen …
Wir haben die ganze Zeit gestritten und jedes Mal hatten wir ein paar schmerzhafte Worte und haben Schluss gemacht	Es tut mir leid zu hören, dass ihr euch gestritten habt und es zu schmerzhaften Worten gekommen ist, die letztendlich zur Trennung geführt haben. Streitigkeiten können in Beziehungen leider vorkommen, aber es ist wichtig, Wege zu finden, um konstruktiv miteinander zu kommunizieren und Streitigkeiten zu lösen, anstatt sich gegenseitig zu verletzen. Wenn du möchtest, kann ich dir ein paar Tipps geb…
Als Xiao Zhang auf der Straße ging, hatte er immer das Gefühl, dass die Menschen um ihn herum ihn anstarrten, und sein Geisteszustand wurde immer instabiler	. Das Gefühl, von anderen beobachtet zu werden, kann eine belastende Erfahrung sein und zu einer Verschlechterung des geistigen Wohlbefindens führen. Hier sind einige mögliche Schritte, die Xiao Zhang unternehmen könnte, um mit dieser Situation umzugehen: 1. Selbstreflexion: Xiao Zhang könnte versuchen, seine eigenen Gedanken und Überzeugungen zu untersuchen, um zu verstehen, warum er glaubt, das…
Ich habe das Gefühl, dass es ein Problem in meiner zwischenmenschlichen Beziehung gibt. Es ist schwierig, mit Freunden, Familienmitgliedern und Kollegen zu kommunizieren und zu kommunizieren. Manchmal kommt es sogar zu Konflikten und Streitigkeiten. Dadurch fühle ich mich sehr frustriert und hilflos. Ich weiß es nicht wie man gesunde Beziehungen aufbaut	Es tut mir leid zu hören, dass du Schwierigkeiten in deinen zwischenmenschlichen Beziehungen hast. Gesunde Beziehungen aufzubauen erfordert Zeit, Mühe und Kommunikation. Hier sind einige Schritte, die dir helfen können: 1. Reflektiere über dich selbst: Überdenke deine eigenen Verhaltensweisen und Denkmuster. Bist du offen für andere Meinungen? Hörst du aktiv zu? Bist du empathisch? Eine gesunde B…
Ich war unzufrieden mit meinem Aussehen und meinem Körper und war ständig selbstverurteilend und zweifelte an mir selbst, was zu einem geringen Selbstvertrauen und Selbstwertgefühl führte.	Es tut mir leid zu hören, dass Sie sich unzufrieden mit Ihrem Aussehen und Ihrem Körper fühlen. Es ist wichtig zu verstehen, dass viele Menschen mit ähnlichen Gefühlen und Zweifeln kämpfen. Es kann jedoch hilfreich sein, daran zu arbeiten, Ihr Selbstvertrauen und Ihre Selbstliebe zu stärken. Im Folgenden sind einige Tipps, die Ihnen dabei helfen könnten: 1. Üben Sie Selbstakzeptanz: Akzeptieren S…
Ich fühle mich oft allein und hilflos, als würde mich niemand wirklich verstehen, und es fällt mir schwer, mit Menschen in Kontakt zu treten, was mich stört und es schwierig macht, eine Lösung zu finden	Es tut mir leid zu hören, dass du dich oft allein und hilflos fühlst. Das ist eine schwierige Situation, aber es gibt Schritte, die du unternehmen kannst, um dich besser zu fühlen und in Kontakt mit anderen zu treten. 1. Akzeptiere deine Gefühle: Es ist wichtig, dass du deine Gefühle anerkennst und akzeptierst. Es ist normal, sich manchmal allein und hilflos zu fühlen. Indem du dies akzeptierst, …
Nach der Scheidung meiner Eltern lebe ich im Haus meiner Großmutter. Obwohl ich bei meiner Mutter lebe, habe ich immer das Gefühl, dass sie fremder ist als meine Großmutter, und ich weiß nicht, wie ich mit ihr kommunizieren soll.	Es ist normal, nach der Scheidung deiner Eltern eine Veränderung in deinem familiären Umfeld zu spüren und sich unsicher zu fühlen, wie man mit der Mutter kommunizieren soll. Hier sind ein paar Vorschläge, die dir helfen könnten, eine bessere Kommunikation mit deiner Mutter aufzubauen: 1. Offenheit: Versuche, offen und ehrlich mit deiner Mutter über deine Gefühle zu sprechen. Erkläre ihr, dass du…
Meine Misserfolge sind zahlreicher als meine Erfolge. Immer öfter tröste ich mich selbst mit der Vorstellung, dass harte Arbeit zwangsläufig belohnt wird. Doch die Realität enttäuscht oft.	Es tut mir leid zu hören, dass du dich von zahlreichen Misserfolgen entmutigt fühlst. Es ist verständlich, dass du dich nach harter Arbeit belohnt sehen möchtest. Es ist wichtig anzuerkennen, dass Erfolg nicht immer unmittelbar oder auf die erwartete Weise kommt. Manchmal braucht es mehr Zeit oder einen anderen Ansatz, um die gewünschten Ergebnisse zu erzielen. In solchen Momenten kann es hilfrei…
Ich habe starke Angst davor, dass etwas passieren könnte und kann mich nicht beruhigen	Es tut mir leid zu hören, dass du so starke Angst hast. Es ist wichtig zu wissen, dass es normal ist, Angst zu haben, aber es ist auch wichtig, Wege zu finden, um sich zu beruhigen. Hier sind ein paar Tipps, die dir vielleicht helfen können: 1. Atme tief ein und aus: Praktiziere bewusstes Atmen, indem du langsam und tief durch die Nase einatmest und durch den Mund ausatmest. Das kann dir helfen, …
Ich habe das Gefühl, dass ich in einem Zustand der Verwirrung war und nicht wusste, was ich will und was ich tun sollte, was mich sehr stört und manchmal bei mir negative Gefühle hervorruft.	Es ist normal, sich manchmal verwirrt zu fühlen und nicht genau zu wissen, was man will oder tun soll. Es ist ein Teil des Lebens, herauszufinden, wer wir sind und was uns glücklich macht. Hier sind ein paar Tipps, die dir helfen können, dich selbst besser zu verstehen und Klarheit zu gewinnen: 1. Selbstreflexion: Nimm dir Zeit, um über deine Ziele, Wünsche, Interessen und Werte nachzudenken. Fra…
Fühle mich gelegentlich niedergeschlagen und es ist schwierig, aus negativen Emotionen herauszukommen. Wie kann ich meine Mentalität anpassen?	Es tut mir leid zu hören, dass Sie sich gelegentlich niedergeschlagen fühlen. Es gibt verschiedene Strategien, um Ihre Mentalität anzupassen und aus negativen Emotionen herauszukommen. Hier sind einige Tipps, die Ihnen helfen könnten: 1. Selbstreflexion: Nehmen Sie sich Zeit, um Ihre Gedanken und Gefühle zu analysieren. Fragen Sie sich, was genau Sie niedergeschlagen macht und warum. Dies kann Ih…
Ich habe immer das Gefühl, dass ich nicht gut genug, nicht klug genug, nicht schön genug bin, und ich möchte mich oft perfekt verpacken, um zu verhindern, dass andere meine Mängel sehen	Es tut mir leid zu hören, dass du dich so fühlst. Es ist wichtig zu verstehen, dass niemand perfekt ist, und es ist nicht realistisch, ständig perfekt zu sein oder perfekt vor anderen erscheinen zu wollen. Jeder hat Stärken und Schwächen und es ist menschlich, Fehler zu machen. Versuche, dich statt auf deine vermeintlichen Unzulänglichkeiten auf deine positiven Eigenschaften zu konzentrieren. Erk…
Oft fühle ich mich innerlich leer, es fehlt mir das Gefühl der Zugehörigkeit und des Sinns	Es tut mir leid zu hören, dass du dich innerlich leer fühlst und das Gefühl der Zugehörigkeit und des Sinns vermisst. Solche Gefühle können sehr belastend sein. Es kann hilfreich sein, darüber mit einem vertrauenswürdigen Freund, Familienmitglied oder einem professionellen Therapeuten zu sprechen, um eine unterstützende Unterhaltung zu führen. Sie könnten in der Lage sein, Ihnen neue Perspektiven…
Immer wenn jemand mit mir spricht oder mich lobt, habe ich das Gefühl, dass sie mich nur täuschen wollen, weil ich es nicht wert bin, respektiert zu werden.	Es tut mir leid zu hören, dass du dieses Gefühl hast. Es klingt nach einem Mangel an Selbstvertrauen und Selbstwertgefühl. Es ist wichtig zu wissen, dass du es wert bist, respektiert und geschätzt zu werden. Negative Gedanken über sich selbst können oft irrationale Überzeugungen sein, die uns davon abhalten, unser volles Potenzial zu entfalten. Es kann hilfreich sein, mit einem professionellen Th…
Ich habe Angst, dass ich von anderen kritisiert und abgelehnt werde, was zu einem immer geringeren Selbstvertrauen führen wird. Wie kann ich mein Selbstvertrauen verbessern?	Es ist normal, Angst vor Kritik und Ablehnung zu haben, aber es ist wichtig, daran zu arbeiten, dein Selbstvertrauen zu stärken. Hier sind einige Tipps, die dir dabei helfen können: 1. Selbstreflexion: Nimm dir Zeit, um dich selbst besser kennenzulernen und deine Stärken, Talente und Erfolge anzuerkennen. Konzentriere dich auf das Positive an dir und erinnere dich daran, dass niemand perfekt ist.…
Ich weiß nicht, wie ich mit meinen Emotionen umgehen soll. Ich explodiere oft wegen Kleinigkeiten. Ich habe das Gefühl, dass ich meine Emotionen nicht kontrollieren kann. Bedeutet das, dass ich ein psychisches Problem habe?	Es ist normal, dass Menschen unterschiedlich mit Emotionen umgehen und dass wir gelegentlich überreagieren können. Allerdings, wenn du das Gefühl hast, dass du deine Emotionen regelmäßig nicht unter Kontrolle hast und oft "explodierst", kann es für dich sinnvoll sein, professionelle Hilfe in Anspruch zu nehmen. Ein psychisches Problem zu haben bedeutet nicht, dass etwas mit dir grundsätzlich "fal…
Ich bin voller Angst und Unsicherheit über die Zukunft, ich weiß nicht, welchen Weg ich gehen soll, ich fühle mich jeden Tag sehr verloren	Es tut mir leid zu hören, dass du dich so ängstlich und unsicher fühlst. Es ist normal, dass man sich manchmal verloren fühlt, besonders wenn es um die Zukunft geht. Hier sind ein paar Schritte, die dir dabei helfen können, dich besser zu fühlen und eine Richtung für dich zu finden: 1. Nimm dir Zeit zum Nachdenken: Setze dich in Ruhe hin und versuche herauszufinden, was dich wirklich interessiert…
Ich leide schon seit jeher unter einer Zwangsstörung. Ich muss oft immer wieder kontrollieren, ob Türen und Fenster geschlossen sind, ob Elektrogeräte ausgeschaltet sind usw. Wenn diese Anforderungen nicht erfüllt werden können, fühle ich mich sehr verunsichert und verängstigt . Wie man dieses Problem beseitigt.	Es tut mir leid zu hören, dass Sie unter einer Zwangsstörung leiden. Zwangsstörungen können eine große Belastung darstellen, aber es gibt verschiedene Möglichkeiten, um damit umzugehen und das Problem zu lindern. Eine effektive Behandlungsmethode für Zwangsstörungen ist die kognitive Verhaltenstherapie (CBT). Ein CBT-Therapeut kann Ihnen dabei helfen, die ungesunden Denkmuster und Verhaltensweise…
Manchmal fühle ich mich gelangweilt, ich weiß nicht, was ich tun soll, und ich weiß nicht, was die Zukunft für mich bereithält, und ich fühle mich leer.	Es tut mir leid zu hören, dass du dich so fühlst. Es ist normal, ab und zu Langeweile zu empfinden und sich Gedanken über die Zukunft zu machen. Hier sind einige Vorschläge, wie du mit diesen Gefühlen umgehen kannst: 1. Entdecke neue Hobbys oder Interessen: Probiere neue Aktivitäten aus, wie zum Beispiel Lesen, Malen, Kochen, Musik hören oder eine neue Sportart erlernen. Dies kann dir helfen, dic…
Ich wollte schon immer ein Baby haben, aber als ich schwanger war, hatte ich immer das Gefühl, dass ich nicht in der Lage wäre, eine gute Mutter zu sein	Es ist völlig normal und verständlich, sich Sorgen darüber zu machen, ob man eine gute Mutter sein wird. Die Tatsache, dass du dir Gedanken darüber machst, zeigt, dass du Verantwortung übernehmen möchtest und dir bewusst bist, wie wichtig diese Rolle ist. Es ist wichtig zu bedenken, dass viele Eltern Ängste und Zweifel haben, insbesondere während der Schwangerschaft. Es ist eine große Veränderung…
Ich machte mir immer Sorgen um meinen Körper und meine Gesundheit und befürchtete, dass ich verschiedene Krankheiten bekommen könnte, was mich sehr nervös und ängstlich machte.	Es ist verständlich, dass du dir um deinen Körper und deine Gesundheit Sorgen machst. Es ist wichtig, auf sich selbst zu achten und auf mögliche Anzeichen von Krankheiten zu achten. Allerdings ist es auch wichtig, nicht zu sehr in Sorgen und Ängste zu verfallen, da dies die Lebensqualität beeinträchtigen kann. Es gibt einige Dinge, die du tun kannst, um dich besser um deine Gesundheit zu kümmern …
Ich bin sehr selbstbewusst und wählerisch, was mein Aussehen und meine Figur angeht, und bin oft in einer Art endloser Selbstkorrektur und Veränderung gefangen	Es ist völlig normal, dass Personen ein gewisses Maß an Selbstbewusstsein und bestimmte Vorlieben haben, wenn es um ihr Aussehen und ihre Figur geht. Es wird jedoch problematisch, wenn dieses Streben nach Perfektion zu einem ungesunden Verhalten führt. Es ist wichtig, ein realistisches Bild von sich selbst zu haben und anzuerkennen, dass niemand perfekt ist. Es ist unmöglich, immer allen Schönhei…
Lernbehinderungen kommen häufig vor und Sie können das Lernen unterhaltsamer gestalten, indem Sie es wie ein Spiel behandeln	Ja, das ist eine großartige Idee! Das Lernen kann für Menschen mit Lernbehinderungen oft herausfordernd sein, aber indem man es wie ein Spiel gestaltet, kann man die Motivation und das Interesse steigern. Hier sind einige Möglichkeiten, wie man das Lernen unterhaltsamer gestalten kann: 1. Belohnungssystem: Führen Sie ein Belohnungssystem ein, bei dem die Person Punkte, Sterne oder virtuelle Ausze…
Natürlich möchte ich jemanden haben, auf den ich mich verlassen kann, aber ich weiß nicht, wie ich das angehen soll. Jedes Mal, wenn ich es versuche, scheitere ich, und dann verliere ich den Mut und kehre zum ursprünglichen Punkt zurück.	Es ist verständlich, dass es frustrierend sein kann, immer wieder an dieser Herausforderung zu scheitern. Es ist jedoch wichtig, den Mut nicht zu verlieren und weiterzumachen. Hier sind ein paar Schritte, die dir helfen können, jemanden zu finden, auf den du dich verlassen kannst: 1. Reflektiere über deine Bedürfnisse: Überlege dir, welche Eigenschaften und Qualitäten du bei einer verlässlichen P…
Ich stelle fest, dass mein Interesse und meine Begeisterung für Dinge immer geringer werden und ich mich immer weniger motiviert fühle, irgendetwas zu tun. Ist das ein psychisches Problem?	Es tut mir leid zu hören, dass Sie Ihr Interesse und Ihre Motivation verlieren. Es ist möglich, dass dies ein Anzeichen für ein psychisches Problem sein könnte, insbesondere wenn es über einen längeren Zeitraum anhält und Ihr alltägliches Leben beeinträchtigt. Es könnte sich um eine Depression handeln, da ein vermindertes Interesse an Aktivitäten und eine verminderte Motivation häufige Symptome d…
Regelmäßiger psychischer Druck beeinträchtigt unsere emotionale Stabilität und kann sich auf unsere körperliche Gesundheit auswirken. Wir sollten gute Arbeit bei der Förderung der psychischen Qualität leisten und eine Aufklärung über psychische Gesundheit durchführen	Stimmt, regelmäßiger psychischer Druck kann negative Auswirkungen auf unsere emotionale Stabilität und körperliche Gesundheit haben. Eine gute psychische Gesundheit ist genauso wichtig wie unsere körperliche Gesundheit, und es ist wichtig, dass wir uns dafür engagieren, sie zu fördern. Eine effektive Möglichkeit, die psychische Qualität zu verbessern, besteht darin, über psychische Gesundheit auf…
Ich wurde eine Nacht lang widerrechtlich eingesperrt, bis zur Schwäche gefoltert, weinte allein in einer Ecke, nur Tränen erhellten die Dunkelheit	Es tut mir leid zu hören, dass Sie solch traumatische Erfahrungen gemacht haben. Das klingt nach einer sehr belastenden und emotional schwierigen Situation. Es kann hilfreich sein, professionelle Unterstützung in Anspruch zu nehmen, um das Erlebte zu verarbeiten. Sie könnten sich an eine therapeutische oder Beratungsstelle wenden, um mit jemandem über Ihre Gefühle und Erfahrungen zu sprechen.
Im Hinblick auf die psychische Gesundheit von Jugendlichen ist es sehr wichtig zu lernen, wie man eine gesunde Beziehung aufbaut und wie man seine Gefühle und Ansprüche richtig ausdrückt	Das stimmt absolut. Eine gesunde Beziehung und die Fähigkeit, seine Gefühle und Bedürfnisse auszudrücken, sind entscheidend für die psychische Gesundheit von Jugendlichen. Hier sind einige Grundsätze, die ihnen helfen können, dies zu erreichen: 1. Selbstreflexion: Jugendliche sollten sich bewusst sein, wer sie sind und was sie wollen, um in der Lage zu sein, ihre Gefühle und Bedürfnisse klar zu k…
Ich habe in letzter Zeit häufig Albträume, und diese Träume machen mir Angst und Unbehagen und beeinträchtigen sogar meine Schlafqualität und mein tägliches Leben.	Es tut mir leid zu hören, dass Sie Albträume haben, die Ihre Schlafqualität und Ihr tägliches Leben beeinträchtigen. Albträume können verschiedene Ursachen haben, wie Stress, Ängste oder traumatische Erlebnisse. Es gibt jedoch Möglichkeiten, mit ihnen umzugehen. Hier sind ein paar Tipps, die Ihnen vielleicht helfen können: 1. Identifizieren Sie mögliche Auslöser: Versuchen Sie herauszufinden, ob …
Ich bin immer ängstlich und sorge mich ständig darüber, wie die Dinge laufen, vor allem kleine Dinge können auch dazu führen, dass ich mich unwohl und unwohl fühle	Es tut mir leid zu hören, dass Sie sich ständig ängstlich und besorgt fühlen. Es ist wichtig zu verstehen, dass Angst und Sorgen Teil des menschlichen Lebens sind, aber wenn sie übermäßig werden, kann es hilfreich sein, Strategien zu entwickeln, um damit umzugehen. Hier sind einige Vorschläge: 1. Selbstreflexion: Versuchen Sie herauszufinden, welche spezifischen Dinge oder Situationen Ihre Ängste…
Ich kann meine negativen Gedanken nicht unterdrücken, manchmal denke ich immer noch an das Schlimmste, selbst wenn die Dinge nicht so schlimm sind. Ich fühle mich so deprimiert und hilflos, ich habe das Gefühl, dass ich dieses Gefühl niemals loswerden kann.	Es tut mir leid zu hören, dass du dich so deprimiert und hilflos fühlst. Negative Gedanken loszuwerden kann eine Herausforderung sein, aber es gibt einige Schritte, die du unternehmen kannst, um deine mentale Gesundheit zu verbessern: 1. Akzeptiere deine Gefühle: Es ist wichtig anzuerkennen, dass negative Gedanken und Emotionen normal sind und dass es okay ist, sie zu haben. Akzeptiere deine Gefü…
Ich habe das Gefühl, dass mein Leben langweilig ist und es mir an Leidenschaft und Motivation mangelt, wodurch ich mich deprimiert und verloren fühle	Es tut mir leid zu hören, dass du dich so fühlst. Langeweile und das Fehlen von Leidenschaft und Motivation können sehr belastend sein. Es ist jedoch wichtig zu bedenken, dass diese Gefühle normalerweise vorübergehend sind und es Wege gibt, um damit umzugehen und sie zu überwinden. Hier sind ein paar Vorschläge, die dir dabei helfen könnten: 1. Identifiziere deine Interessen: Frage dich selbst, w…
Ich leide häufig unter Schlaflosigkeit. Nachts liege ich im Bett und denke an Arbeit, familiäre Angelegenheiten und zwischenmenschliche Beziehungen, wodurch ich tagsüber nicht fokussiert bin und meine Arbeitsleistung beeinträchtigt ist. Meine Stimmung ist ebenfalls sehr schlecht.	Es tut mir leid zu hören, dass du unter Schlaflosigkeit leidest und dass es sich auf deine Arbeitsleistung und Stimmung auswirkt. Schlaflosigkeit kann viele Ursachen haben, aber es gibt einige Strategien, die dir helfen könnten, besser zu schlafen. 1. Schaffe eine Schlafroutine: Sorge für eine regelmäßige Schlafenszeit und Aufwachzeit. Versuche, vor dem Schlafengehen eine entspannende Aktivität z…
Wenn ich Rückschläge und Enttäuschungen erlebe, denke ich, dass der einzige Weg, auf Nummer sicher zu gehen, darin besteht, alles zu vergessen.	Es ist verständlich, dass Rückschläge und Enttäuschungen uns oft dazu verleiten, unsere Schutzmauern hochzuziehen und uns zurückzuziehen. Es kann sich sicher anfühlen, alles zu vergessen, um zukünftige Verletzungen zu vermeiden. Allerdings ist es wichtig zu bedenken, dass das Vergessen oder Ignorieren von Erfahrungen nicht immer der beste Weg ist, um mit Rückschlägen umzugehen. Solche Erfahrungen…
Ich fühle mich oft müde und kraftlos, auch wenn ich keine körperliche Arbeit geleistet habe. Ich habe auch häufig Schlafstörungen und kann nicht einschlafen, was mich sehr unwohl und belastet fühlen lässt.	Es tut mir leid zu hören, dass Sie sich müde und kraftlos fühlen und Schlafstörungen haben. Es gibt verschiedene mögliche Ursachen für diese Symptome, aber es ist wichtig, dass Sie mit einem Arzt sprechen, um eine genaue Diagnose zu erhalten und die beste Vorgehensweise zu besprechen. Es gibt jedoch einige allgemeine Tipps, die Ihnen helfen könnten: 1. Regelmäßiger Schlafrhythmus: Versuchen Sie, …
Ich leide manchmal unter Depressionen, kann nicht normal essen und kontrolliere dann mein Essen, weil ich Angst habe, dass die Leute sehen, dass ich dünner werde	Es tut mir leid zu hören, dass Sie unter Depressionen leiden und Schwierigkeiten haben, normal zu essen. Es ist wichtig, dass Sie bei solchen Problemen Unterstützung von Fachleuten suchen. Ein erster Schritt kann sein, mit einem Arzt oder Therapeuten über Ihre Situation zu sprechen. Sie können Ihnen bei der Diagnose und Behandlung von Depressionen helfen und auch Empfehlungen für eine angemessene…
Meine Eltern kritisieren mich ständig und egal, was ich tue, ist nicht gut genug, es macht mich sehr deprimiert und enttäuscht, ich habe das Gefühl, dass ich nie in der Lage sein werde, ihre Zustimmung und ihr Lob zu bekommen	Es tut mir leid zu hören, dass du mit dieser Situation kämpfst. Es kann sehr belastend sein, wenn wir das Gefühl haben, dass wir die Anerkennung und Zustimmung unserer Eltern nicht bekommen können. Hier sind ein paar Vorschläge, wie du damit umgehen könntest: 1. Kommunikation: Spreche mit deinen Eltern über deine Gefühle und deine Bedürfnisse. Erkläre ihnen, wie ihre ständige Kritik dich belastet…
Meine Beziehung war schon immer sehr instabil, ich werde immer von Emotionen kontrolliert und bin nicht in der Lage, meine Beziehung auf gesunde Weise aufrechtzuerhalten	Es tut mir leid zu hören, dass deine Beziehung so instabil ist und du Schwierigkeiten hast, deine Emotionen in den Griff zu bekommen. Es kann eine Herausforderung sein, eine gesunde Beziehung aufrechtzuerhalten, besonders wenn man von Emotionen überwältigt wird. Hier sind einige Tipps, die dir helfen könnten: 1. Selbstreflexion: Nimm dir Zeit für dich selbst und reflektiere, warum du von Emotione…
Xiaoling wurde im College gemobbt, wodurch sie minderwertig und depressiv wurde. Wie kann ich ihr helfen, ihr Selbstvertrauen und ihre geistige Gesundheit wiederzugewinnen?	Es tut mir leid zu hören, dass Xiaoling gemobbt wurde und darunter leidet. Hier sind einige Vorschläge, wie du ihr helfen kannst, ihr Selbstvertrauen und ihre geistige Gesundheit wiederzugewinnen: 1. Höre ihr aktiv zu: Lass Xiaoling über ihre Erfahrungen, Ängste und Sorgen sprechen. Gib ihr Raum, ihre Gefühle auszudrücken und nimm ihre Erfahrungen ernst. 2. Ermutige sie, Hilfe zu suchen: Ermutige…
Meine familiären Beziehungen waren kompliziert und ich war oft gestresst und unsicher und wusste nicht, wie ich damit umgehen sollte oder an wen ich mich um Hilfe wenden sollte.	Es tut mir leid zu hören, dass du dich in deinen familiären Beziehungen gestresst und unsicher fühlst. Es kann eine herausfordernde Situation sein, mit solchen Komplexitäten umzugehen. Hier sind einige Schritte, die du unternehmen könntest, um dir Hilfe und Unterstützung zu holen: 1. Sprich mit vertrauenswürdigen Freunden oder anderen Familienmitgliedern über deine Gefühle und Sorgen. Manchmal ka…
Ich habe einen Freund, der sich immer negativ beschwert und zu nichts eine positive Einstellung hat. Ich glaube, seine Negativität beeinflusst meine Gefühle, aber ich weiß nicht, wie ich mit ihm kommunizieren soll	Es kann schwierig sein, mit jemandem umzugehen, der sich ständig negativ beschwert und keine positive Einstellung hat. Hier sind ein paar Tipps, wie du mit deinem Freund kommunizieren kannst: 1. Zeige Empathie: Versuche, seine Perspektive zu verstehen und Mitgefühl für seine Situation aufzubringen. Das bedeutet jedoch nicht, dass du seine negative Einstellung unterstützen oder akzeptieren musst. …
In letzter Zeit habe ich festgestellt, dass ich immer wieder unter Schlaflosigkeit leide. Selbst wenn ich einschlafe, habe ich Albträume und fühle mich nach dem Aufwachen sehr belastet. Was kann ich tun?	Schlaflosigkeit und Albträume können sehr belastend sein, aber es gibt einige Maßnahmen, die du ergreifen kannst, um deine Schlafqualität zu verbessern: 1. Schaffe eine entspannende Schlafumgebung: Stelle sicher, dass dein Schlafzimmer dunkel, ruhig und kühl ist. Sorge für eine bequeme Matratze und Kissen und vermeide übermäßigen Lärm und Licht. 2. Halte dich an einen festen Schlafplan: Versuche,…
Wenn ich mit Freunden chatte, habe ich manchmal immer das Gefühl, dass das Gespräch beendet ist und es nichts zu sagen gibt	Es ist völlig normal, dieses Gefühl manchmal im Chat zu haben. Hier sind einige Tipps, wie du das Gespräch am Laufen halten kannst: 1. Stelle Fragen: Frage deine Freunde nach ihren Interessen, Plänen oder was in ihrem Leben gerade los ist. Das gibt dir die Möglichkeit, das Gespräch auf neue Themen zu lenken. 2. Teile Erfahrungen: Erzähle von etwas Lustigem oder Interessantem, das dir passiert ist…
Mein Kind wird in der Schule gemobbt und ist jetzt sehr zurückgezogen und ich weiß nicht, wie ich ihm helfen kann	Es tut mir leid zu hören, dass Ihr Kind gemobbt wird. Das ist eine schwierige Situation, aber es gibt Schritte, die Sie unternehmen können, um Ihrem Kind zu helfen: 1. Nehmen Sie das Problem ernst: Zeigen Sie Ihrem Kind, dass Sie das Mobbing ernst nehmen und dass Sie für es da sind. Lassen Sie Ihr Kind seine Gefühle ausdrücken und ermutigen Sie es, über seine Erfahrungen zu sprechen. 2. Bewahren …
Wenn ich mit Menschen kommuniziere, bin ich immer sehr nervös. Ich weiß nicht, was ich sagen soll, und ich habe Angst, dass ich das Falsche sage.	Es ist völlig normal, sich gelegentlich nervös zu fühlen, wenn man mit anderen kommuniziert. Hier sind einige Tipps, die dir dabei helfen können, deine Nervosität zu reduzieren: 1. Mach dir bewusst, dass Fehler und Missverständnisse beim Sprechen normal sind. Niemand erwartet, dass du perfekt bist. 2. Bereite dich im Voraus vor, indem du mögliche Themen oder Fragen durchgehst, über die du spreche…
Immer wenn ich allein bin, verspüre ich ein unerklärliches Angstgefühl, das unwissentlich von einer unsichtbaren Kraft kontrolliert wird. Ich habe das Gefühl, gefangen zu sein, gefangen in einer undurchdringlichen Hülle, manchmal wird mir alles furchtbar unheimlich	Es tut mir leid zu hören, dass du solche Ängste erlebst. Es könnte hilfreich sein, einen Therapeuten oder Psychologen aufzusuchen, der dir dabei helfen kann, die genaue Ursache deiner Angstgefühle zu identifizieren und Bewältigungsstrategien zu entwickeln. In der Zwischenzeit gibt es einige Maßnahmen, die du ergreifen kannst, um dich zu beruhigen, wenn diese Gefühle auftreten: 1. Atme tief ein un…
Ich war immer zu hart zu mir selbst und hatte das Gefühl, nicht gut genug zu sein, um geliebt und geschätzt zu werden	Es tut mir leid zu hören, dass du dich so fühlst. Es ist wichtig zu erkennen, dass du wertvoll bist und dass deine Selbstwahrnehmung nicht immer objektiv sein muss. Jeder hat Stärken und Schwächen, und niemand ist perfekt. Anstatt dich selbst zu kritisieren, versuche, dich selbst so anzunehmen, wie du bist, und entwickle ein gesundes Maß an Selbstliebe und Selbstakzeptanz. Eine Möglichkeit, dies …
Mein Leben ist nur eine ständige Frustration, ich versage, egal was ich tue, ich fühle mich wertlos	Es tut mir leid zu hören, dass du dich so frustriert und wertlos fühlst. Es ist wichtig zu verstehen, dass jeder von Unsicherheiten und Misserfolgen betroffen sein kann. Es gibt jedoch Möglichkeiten, mit diesen Gefühlen umzugehen und positive Veränderungen herbeizuführen. Hier sind einige Tipps, die dir helfen könnten: 1. Selbstreflexion: Nimm dir Zeit, um über deine Stärken, Talente und Interess…
Ich wurde immer gemobbt, auf mich herabgeschaut, fühlte mich nutzlos, inkompetent, unfähig, in sozialen Situationen meine wahre Stärke und mein Können zu zeigen, und versteckte mich immer in der Ecke	Ich bedauere zu hören, dass Sie diese schwierigen Erfahrungen gemacht haben. Mobbing und das Gefühl der Unterlegenheit können sehr belastend sein. Es ist wichtig, sich Ihrer eigenen Stärken und Talente bewusst zu werden und diese zu würdigen. Hier sind einige Schritte, die Ihnen helfen können: 1. Selbstreflexion: Nehmen Sie sich Zeit, um Ihre eigenen Stärken, Interessen und Fähigkeiten zu identif…
Ich fühle mich verwirrt und hilflos, was die Zukunft angeht, ich weiß nicht, was ich tun soll und ich weiß nicht, was ich will.	Es tut mir leid zu hören, dass du dich so fühlen. Es ist normal, gelegentlich verwirrt und hilflos zu sein und sich unsicher über die Zukunft zu fühlen. Hier sind einige Vorschläge, die dir dabei helfen können, Klarheit zu finden: 1. Selbstreflexion: Nimm dir Zeit, um über deine Stärken, Interessen und Werte nachzudenken. Eine Idee ist, eine Liste deiner Erfolge und Dinge, die dir Freude bereiten…
Ich weiß nicht, warum ich immer zu viel nachdenke, mir Sorgen um die Zukunft mache und jedes Mal, wenn ich rausgehe, noch einmal kontrollieren muss, ob ich die Tür verschließe und die Fenster schließe, was mich sehr müde und gereizt macht	Es tut mir leid zu hören, dass du unter diesen belastenden Gedanken und Verhaltensweisen leidest. Es scheint, als könntest du unter Symptomen von Angst oder einer Angststörung leiden. Es ist wichtig zu betonen, dass ich als KI-Assistent keine lizenzierte Therapeutin bin, aber ich kann dir einige Empfehlungen geben, wie du mit diesen Problemen umgehen könntest. 1. Informiere dich über Angststörung…
Ich wurde schon lange sexuell missbraucht, fühle aber immer noch Schmerz und Kummer. Wie kann ich mit diesem vergangenen Schmerz umgehen?	Es tut mir leid zu hören, dass Sie dies durchgemacht haben und immer noch mit dem Schmerz und Kummer zu kämpfen haben. Der Umgang mit dem vergangenen Missbrauch kann ein langwieriger Prozess sein, aber es gibt Maßnahmen, die Ihnen helfen können. 1. Suchen Sie professionelle Hilfe: Eine Therapie bei einem qualifizierten Therapeuten oder Berater kann Ihnen dabei helfen, Ihre Gefühle und den Schmerz…
Ich hatte das Gefühl, dass mein Leben keinen Sinn und Zweck hatte, dass ich nicht finden konnte, was ich wirklich tun wollte, und dieses Gefühl des Verlorenseins war sehr schmerzhaft.	Es tut mir leid zu hören, dass du dich so gefühlt hast. Es ist nicht ungewöhnlich, solche Gedanken oder das Gefühl der Ziellosigkeit zu haben. Viele Menschen durchleben Phasen, in denen sie sich verloren oder unsicher über ihren Lebenszweck fühlen. Es ist wichtig zu wissen, dass du nicht allein bist und dass es Wege gibt, um damit umzugehen. Hier sind einige Schritte, die dir helfen könnten, dein…
Eines Tages fand ich einen Weg, meiner realen Welt zu entfliehen, indem ich meinen Kopf auf das Sofa legte, meine Ohren zusteckte und nicht auf die Außengeräusche hörte, so dass ich ganz in eine Welt eintauchen konnte, in der nur ich selbst war. In dieser Welt werden alle Probleme verschwinden.	Es klingt so, als hättest du eine Methode gefunden, um Momente der Entspannung und des Rückzugs zu finden. Es ist wichtig, Momente für sich selbst zu haben und sich von äußeren Einflüssen abzuschirmen, um innere Ruhe zu finden. Es ist auch normal, gelegentlich einen Ort oder eine Aktivität zu brauchen, um dem Stress und den Problemen des Alltags zu entkommen. Es gibt verschiedene Möglichkeiten, i…
Ich fühle mich oft allein und hilflos, habe das Gefühl, von niemandem verstanden oder unterstützt zu werden, selbst wenn Menschen um mich herum sind, ich fühle mich getrennt und entfremdet, diese Emotion macht mich sehr deprimiert und negativ und führt manchmal zu Angstzuständen und depressiven Symptomen	Es tut mir leid zu hören, dass du dich so allein und hilflos fühlst. Diese Gefühle können wirklich belastend sein und es ist wichtig, sich um seine emotionale Gesundheit zu kümmern. Hier sind einige mögliche Schritte, die du unternehmen könntest, um Unterstützung zu finden: 1. Therapeutische Hilfe: Das Gespräch mit einem professionellen Therapeuten kann sehr hilfreich sein, um die Ursachen und Be…
Ein Wort von dir kann mir das Herz brechen	Es tut mir leid zu hören, dass du dich so verletzlich fühlst. Manchmal können Worte tief treffen und emotionalen Schmerz verursachen. Es ist wichtig, sich bewusst zu sein, dass die Macht von Worten sowohl positiv als auch negativ sein kann. Während ein Wort das Herz brechen kann, kann ein anderes Wort auch heilen und trösten. Es liegt in unserer Verantwortung, unsere Worte mit Bedacht zu wählen u…
Ich bin äußerst unzufrieden mit meinem Aussehen und meiner Passform und habe oft ein geringes Selbstwertgefühl und Ängste	Es tut mir leid zu hören, dass du unzufrieden mit deinem Aussehen und deiner Passform bist und unter einem geringen Selbstwertgefühl und Ängsten leidest. Es ist wichtig, sich selbst mit Liebe und Akzeptanz zu betrachten. Hier sind einige Schritte, die du unternehmen kannst, um dein Selbstwertgefühl zu verbessern: 1. Positive Selbstgespräche: Statt dich selbst abzumagern oder dich zu kritisieren, …
Ich weiß wirklich nicht, was ich tue. Ich habe immer keine Ahnung, was ich tun soll, und das macht mich frustriert.	Es ist vollkommen normal, sich hin und wieder unsicher oder überfordert zu fühlen. Hier sind einige Schritte, die dir helfen können, in solchen Momenten Klarheit zu finden: 1. Nimm dir Zeit, um dich selbst zu reflektieren: Frage dich, was deine Ziele, Werte und Interessen sind. Welche Dinge machen dich glücklich oder erfüllen dich? 2. Mach eine Liste oder ein Brainstorming: Schreibe all die mögli…
Ich habe große soziale Ängste, ich traue mich nicht, mit Fremden zu kommunizieren und ich mag es nicht, an überfüllten Orten aufzutauchen. Ich hoffe, dass ich diese Ängste überwinden kann	Es ist verständlich, dass soziale Ängste herausfordernd sein können, aber es ist erfreulich zu hören, dass du daran interessiert bist, sie zu überwinden. Hier sind einige Tipps, die dir dabei helfen könnten: 1. Informiere dich über soziale Ängste: Lerne mehr über soziale Ängste, um ein besseres Verständnis für deine eigenen Ängste zu bekommen. Es kann helfen zu erkennen, dass viele Menschen ähnli…
Psychologen glauben, dass extreme Depressionen die körperliche und geistige Gesundheit einer Person beeinträchtigen können	Ja, das ist richtig. Psychologen glauben, dass extreme Depressionen sowohl die körperliche als auch die geistige Gesundheit einer Person erheblich beeinträchtigen können. Depressionen können zu Symptomen wie Müdigkeit, Appetitveränderungen, Schlafstörungen, einem geschwächten Immunsystem und körperlichen Beschwerden führen. Sie können auch die Konzentration, das Gedächtnis und die Motivation eine…
Immer wenn ich anfange, ein Ziel zu verfolgen, fühle ich mich machtlos, und wenn ich versuche, etwas zu ändern, habe ich das Gefühl, dass mir der Mut fehlt	Es ist normal, Zeiten zu haben, in denen wir uns machtlos fühlen oder den Mut verlieren. Hier sind einige Schritte, die Ihnen helfen können, damit umzugehen: 1. Reflektieren Sie über Ihre Ziele: Überprüfen Sie, ob Ihre Ziele realistisch und erreichbar sind. Manchmal setzen wir uns zu hohe Erwartungen, die uns entmutigen können. Das Schaffen kleinerer, realistischer Ziele kann helfen, das Gefühl d…
Ich leide oft unter Schlaflosigkeit und Konzentrationsschwierigkeiten bei der Arbeit, weil ich mir Sorgen mache, dass ich die Arbeit, die ich mache, nicht schaffen werde	Es tut mir leid zu hören, dass Sie mit Schlaflosigkeit und Konzentrationsschwierigkeiten zu kämpfen haben. Diese können Ihren Alltag beeinträchtigen und es schwierig machen, Ihre Arbeit richtig zu erledigen. Hier sind einige Vorschläge, die Ihnen helfen könnten: 1. Entwickeln Sie eine Schlafroutine: Gehen Sie jeden Tag zur gleichen Zeit ins Bett und stehen Sie zur gleichen Zeit auf. Vermeiden Sie…
Es schmerzt mich mehr denn je, wenn meine Familie meine Hilfe ablehnt	Es tut mir leid zu hören, dass du Schmerzen empfindest, wenn deine Familie deine Hilfe ablehnt. Das kann eine schwierige Situation sein, da es normal ist, dass wir uns von unseren Lieben gebraucht und geschätzt fühlen möchten. Hier sind einige mögliche Schritte, die du unternehmen kannst, um damit umzugehen: 1. Reflexion: Nimm dir Zeit, um über deine eigenen Erwartungen und Bedürfnisse nachzudenk…
Ich fühle mich jedes Mal deprimiert, wenn ich auf Schwierigkeiten stoße	Es tut mir leid zu hören, dass du dich deprimiert fühlst, wenn du auf Schwierigkeiten stößt. Das ist eine normale Reaktion, aber es kann hilfreich sein, ein paar Schritte zu unternehmen, um besser damit umzugehen. Hier sind einige Vorschläge: 1. Akzeptiere deine Gefühle: Es ist wichtig, deine Gefühle anzuerkennen und zu akzeptieren. Achte darauf, dass es normal ist, sich deprimiert zu fühlen, wen…
Ich fühle mich oft deprimiert und hilflos, habe das Gefühl, dass es meinem Leben an Sinn und Wert mangelt, und denke manchmal an Selbstmord, aber ich habe Angst, es irgendjemandem zu erzählen, weil ich befürchte, dass sie denken, ich sei ein schwacher Mensch und ein Versager.	Ich verstehe, dass du dich gerade sehr niedergeschlagen fühlst. Es ist wichtig zu wissen, dass du mit deinen Gefühlen nicht allein bist und es Hilfe für dich gibt. Es ist mutig von dir, über deine Gedanken und Gefühle zu sprechen. Selbstmordgedanken sind ein ernstes Zeichen von emotionaler Not und es ist wichtig, dass du professionelle Hilfe in Anspruch nimmst. Es gibt viele Ressourcen und Hilfsm…
Ich habe einen Freund, der immer das Gefühl hat, er sei nicht gut genug, nicht klug genug, nicht talentiert genug oder nicht einmal wert, dass er sich um ihn kümmert, was mir Sorgen um seine geistige Gesundheit macht.	Es ist verständlich, dass du dir Sorgen um deinen Freund machst. Selbstwertprobleme können sich negativ auf die geistige Gesundheit auswirken. Es gibt verschiedene Möglichkeiten, wie du helfen kannst: 1. Höre zu und unterstütze: Zeige ihm, dass du für ihn da bist und ihm zuhörst. Lasse ihn seine Gedanken und Gefühle ausdrücken, ohne sie abzutun oder zu bewerten. 2. Ermutige positives Denken: Ermu…
Ich leide oft unter dem Druck der Arbeit und den Familienkonflikten und fühle mich dadurch gedrückt und verzweifelt. Wie kann ich diese Emotionen lindern und meine psychologische Gesundheit aufrechterhalten?	Es tut mir leid zu hören, dass du unter so viel Druck und Konflikten leidest. Es gibt einige Dinge, die du tun kannst, um deine Emotionen zu lindern und deine psychologische Gesundheit zu verbessern: 1. Selbstfürsorge: Nimm dir bewusst Zeit für dich selbst, um dich zu entspannen und aufzuladen. Finde Aktivitäten, die dir Freude bereiten und Stress reduzieren, wie z.B. Lesen, Sport treiben, Musik …
In letzter Zeit geraten meine Gedanken zunehmend durcheinander und ich mache mir Sorgen um meine geistige Gesundheit, und das macht mir Angst	Es tut mir leid zu hören, dass du dich so fühlst. Es ist wichtig, auf deine geistige Gesundheit zu achten und angemessene Unterstützung zu suchen. Hier sind einige Schritte, die du unternehmen könntest: 1. Sprich mit einem Arzt oder Psychologen: Vereinbare einen Termin mit einem Fachmann, um über deine Bedenken zu sprechen. Sie können eine Diagnose stellen oder dich an einen Spezialisten überweis…
Ich traue mich nicht, anderen gegenüberzutreten, ich habe immer das Gefühl, dass ich nicht gut genug bin, ich bin nervös, selbst wenn meine Freunde mit mir reden, werde ich mir weiterhin Sorgen darüber machen, was sie denken	Es tut mir leid zu hören, dass du dich so fühlst, aber du bist nicht allein - viele Menschen haben mit ähnlichen Gedanken und Sorgen zu kämpfen. Es ist wichtig zu verstehen, dass die Wahrnehmung, die du von dir selbst hast, nicht unbedingt der Realität entsprechen muss. Oft neigen wir dazu, uns selbst zu kritisieren und uns negativ zu sehen, während andere uns in einem positiveren Licht betrachte…
Ich mache mir Sorgen, dass ich meine geistige Gesundheit nicht aufrechterhalten kann und meine Familie im Stich lasse	Es ist verständlich, dass du dir Sorgen um deine geistige Gesundheit machst und Angst hast, deine Familie im Stich zu lassen. Es ist wichtig, darauf zu achten und auf deine geistige Gesundheit zu achten, besonders in stressigen Zeiten. Hier sind einige Schritte, die dir helfen könnten: 1. Sprich mit deiner Familie: Teile deine Sorgen und Ängste mit ihnen. Offene Kommunikation kann helfen, Unterst…
Ich fühle mich oft allein und hilflos, selbst wenn ich von Menschen umgeben bin, habe ich das Gefühl, dass niemand meine innere Welt versteht	Es tut mir leid zu hören, dass du dich so fühlst. Das Gefühl der Einsamkeit und Hilflosigkeit kann sehr belastend sein. Es ist wichtig zu wissen, dass du damit nicht allein bist. Viele Menschen erleben ähnliche Gefühle. Es kann hilfreich sein, über deine Gefühle und Gedanken mit anderen Menschen zu sprechen. Suche nach einer vertrauenswürdigen Person, wie zum Beispiel einem Freund, Familienmitgli…
Ich bin sehr verwirrt über die Zukunft, ich weiß nicht, was ich tun soll, diese Verwirrung macht mich sehr ängstlich und unruhig	Es ist verständlich, dass du besorgt und verwirrt über die Zukunft bist. Solche Gefühle sind häufig, besonders wenn man vor wichtigen Entscheidungen steht oder sich in einer unsicheren Phase befindet. Hier sind ein paar Schritte, die dir helfen könnten: 1. Nimm dir Zeit, um deine Gedanken zu ordnen: Schreibe auf, was genau dich verwirrt und ängstlich macht. Identifiziere die konkreten Fragen oder…
Ich war heute auf einer Party, wurde aber von allen ausgelacht und von anderen abgelehnt. Ich war kurz vor dem Zusammenbruch	Es tut mir leid zu hören, dass du eine schwierige Erfahrung auf der Party hattest. Es kann sehr schmerzhaft sein, von anderen abgelehnt oder ausgelacht zu werden. Es ist wichtig zu wissen, dass solche Situationen nicht deine Schuld sind und nicht deine ganze Identität widerspiegeln. Hier sind ein paar Dinge, die du vielleicht tun kannst, um dich besser zu fühlen: 1. Sprich mit einer vertrauenswür…
Ich finde meine Beziehungen schwierig und es ist immer schwierig, tiefe Verbindungen zu Menschen aufzubauen. Ich hatte das Gefühl, dass ich nicht wusste, wie ich mit Menschen auskommen oder kommunizieren sollte, sodass ich schnell isoliert war. Ich sehne mich danach, echte Freunde zu haben, weiß aber nicht, wie ich sie gewinnen kann.	Es tut mir leid zu hören, dass du Schwierigkeiten hast, tiefe Verbindungen zu Menschen aufzubauen. Beziehungen können manchmal herausfordernd sein, aber es gibt bestimmte Schritte, die du unternehmen kannst, um neue Freundschaften zu finden: 1. Sei offen: Versuche, offen und zugänglich zu sein, wenn du mit Menschen sprichst. Zeige Interesse an ihnen und höre aktiv zu. 2. Gemeinsame Interessen: Su…
Meine Arbeit steht unter großem Druck, ich muss jeden Tag Überstunden machen und bleibe oft lange auf. Ich habe das Gefühl, dass mein Körper und mein Geist an ihre Grenzen gestoßen sind, aber ich kann immer noch nicht aufhören. Was sollte ich tun, um das zu vermeiden? ein Zusammenbruch.	Es tut mir leid zu hören, dass du unter großem Druck stehst und dich am Rand eines Zusammenbruchs fühlst. Es ist wichtig, auf sich selbst zu achten und Maßnahmen zu ergreifen, um Überlastung zu vermeiden. Hier sind einige Vorschläge, die helfen können: 1. Priorisiere und delegiere: Identifiziere die wichtigsten Aufgaben und überlege, welche Aufgaben du delegieren kannst. Kommuniziere offen mit Ko…
Ich habe das Gefühl, dass ich meine Gefühle nicht kontrollieren kann und verliere oft wegen Kleinigkeiten die Beherrschung, was den Menschen um mich herum Unbehagen bereitet	Es ist verständlich, dass es frustrierend sein kann, das Gefühl zu haben, seine Gefühle nicht unter Kontrolle zu haben. Es ist wichtig zu wissen, dass du nicht alleine bist und es Möglichkeiten gibt, daran zu arbeiten. Hier sind einige empfohlene Schritte, um deine Gefühle besser zu kontrollieren: 1. Selbstreflexion: Versuche herauszufinden, welche Situationen oder Auslöser deine Reaktionen hervo…
In meiner Familie gab es keine Liebe, keine warmen Worte, kein wirkliches Gefühl der Sicherheit, nur Vorwürfe und Druck auf mir, sodass ich introvertierter wurde und mit niemandem zu tun haben wollte.	Es tut mir leid zu hören, dass deine Erfahrungen in deiner Familie nicht positiv waren. Es kann schwer sein, in einer Umgebung aufzuwachsen, in der Liebe und Anerkennung fehlen. Es ist wichtig, dass du weißt, dass du nicht alleine bist und dass es Unterstützung gibt, um diese emotionalen Herausforderungen zu bewältigen. Es könnte hilfreich sein, mit einer Vertrauensperson zu sprechen, wie zum Bei…
Ich mache mir Sorgen um meine Zukunft, ich weiß nicht, ob ich erfolgreich sein werde, ob ich meine Träume verwirklichen kann	Es ist völlig normal, sich Sorgen um die Zukunft zu machen und sich Gedanken darüber zu machen, ob man erfolgreich sein wird oder ob man seine Träume verwirklichen kann. Aber lass mich dir einige Dinge sagen, die dir hoffentlich helfen können. Erstens, es ist wichtig zu verstehen, dass wir keine Zukunft vorhersagen können. Das Leben ist voller Überraschungen und manchmal kommt alles ganz anders a…
Ich hatte das Gefühl, dass ich den Stress und die Herausforderungen in meinem Leben nicht bewältigen konnte, und litt oft unter schlechter Stimmung, Angstzuständen und Schlaflosigkeit.	Es tut mir leid zu hören, dass Sie unter solchen Symptomen leiden. Stress und Herausforderungen im Leben können eine starke Auswirkung auf unsere geistige und körperliche Gesundheit haben. Es kann hilfreich sein, Unterstützung und Strategien zur Bewältigung dieser Probleme zu suchen. Hier sind einige Vorschläge, die Ihnen helfen könnten: 1. Sprechen Sie mit einem Fachmann: Suchen Sie Unterstützun…
Ich fühle mich einsam und habe viele Menschen um mich herum, aber ich habe nicht immer das Gefühl, dass ich mich wirklich mit ihnen identifizieren kann. Ist das eine Beziehungsstörung?	Es tut mir leid zu hören, dass du dich einsam fühlst, obwohl du viele Menschen um dich herum hast. Es könnte verschiedene Gründe geben, warum du dich nicht mit den Menschen um dich herum identifizieren kannst. Eine Beziehungsstörung ist eine diagnostizierte psychische Störung, bei der es Schwierigkeiten gibt, Beziehungen aufrechtzuerhalten oder mit anderen Menschen in angemessener Weise zu intera…
Ich fühle mich sehr unwohl, was die Zukunft angeht, weiß nicht, was ich mit mir machen soll, und weiß nicht, was die Zukunft bringt	Es tut mir leid zu hören, dass du dich unwohl fühlst. Unsicherheit über die Zukunft ist eine natürliche Reaktion, aber es gibt Schritte, die du unternehmen kannst, um Klarheit und eine positivere Perspektive zu gewinnen. Hier sind einige Vorschläge: 1. Selbstreflexion: Nimm dir Zeit, um über deine Interessen, Stärken und Werte nachzudenken. Was macht dich glücklich und erfüllt dich? Welche Ziele …
Ich habe viele Probleme in meiner Beziehung und fühle mich deprimiert und hilflos und weiß nicht, was ich tun soll	Es tut mir leid zu hören, dass Sie solche Schwierigkeiten in Ihrer Beziehung haben und sich deprimiert und hilflos fühlen. Es kann schwierig sein, in solchen Momenten den richtigen Weg zu finden. Hier sind ein paar Schritte, die Ihnen helfen könnten: 1. Kommunikation: Versuchen Sie, offen und ehrlich mit Ihrem Partner über Ihre Probleme zu sprechen. Es ist wichtig, Ihre Gefühle und Bedenken auszu…
Ich fühle mich oft sehr müde, körperlich und geistig schwach und habe manchmal sogar Selbstmordgedanken, da ich das Gefühl habe, mein Leben sei bedeutungslos	Es tut mir leid zu hören, dass du dich so fühlen. Es ist wichtig zu verstehen, dass Depressionen und unerklärliche Müdigkeit ernstzunehmende Anliegen sind und Unterstützung benötigen. Hier sind einige Schritte, die du unternehmen kannst: 1. Suche professionelle Hilfe: Zögere nicht, einen Fachmann aufzusuchen, wie einen Arzt oder Therapeuten. Sie können eine genaue Diagnose stellen und eine geeign…
Manchmal verspüre ich plötzlich extreme Angst und Panik, es fällt mir schwer, meine Emotionen und mein Verhalten zu kontrollieren, und dieser Zustand hält lange an.	Es tut mir leid zu hören, dass Sie mit solchen Gefühlen zu kämpfen haben. Es scheint, als könnten Sie unter Angst- und Panikattacken leiden. Es ist wichtig zu wissen, dass Sie nicht allein sind und es Hilfe und Unterstützung gibt, um mit diesen Herausforderungen umzugehen. Hier sind ein paar Schritte, die Sie unternehmen können: 1. Sprechen Sie mit einem Fachmann: Ein professioneller Therapeut od…
Immer wenn ich vor einer neuen Herausforderung stehe, fühle ich mich so nervös und unsicher, dass ich das Gefühl habe, nicht damit klarzukommen	Es ist normal, sich vor neuen Herausforderungen nervös und unsicher zu fühlen. Viele Menschen haben ähnliche Erfahrungen gemacht. Es ist wichtig zu bedenken, dass diese Gefühle Teil des Wachstumsprozesses sind und oft mit einer neuen Situation verbunden sind. Hier sind einige Tipps, die dir helfen könnten, besser damit umzugehen: 1. Atme tief durch: Konzentriere dich auf deine Atmung, um dich zu …
Manchmal habe ich plötzlich das Gefühl, keine Hobbys mehr zu haben, mich für nichts mehr zu interessieren und die Orientierung und Motivation verloren zu haben	Es ist nicht ungewöhnlich, dass Menschen Phasen durchleben, in denen sie das Interesse an Hobbys und Aktivitäten verlieren. Es kann verschiedene Gründe dafür geben, wie zum Beispiel Stress, Überlastung, Veränderungen im Leben oder das Gefühl, in einer Routine festzustecken. Hier sind einige Vorschläge, wie du deine Motivation wiederfinden könntest: 1. Reflektion: Nimm dir Zeit, um über deine mome…
Gelegentlich überkommt mich eine unkontrollierbare Emotion. Ich denke, was soll ich tun, wenn ich an einer Depression leide?	Wenn du der Meinung bist, dass du an einer Depression leidest, ist es wichtig, professionelle Hilfe zu suchen. Hier sind einige Schritte, die du unternehmen kannst: 1. Sprich mit einem Arzt oder Therapeuten: Vereinbare einen Termin bei einem Facharzt oder einem Therapeuten, um deine Symptome zu besprechen. Sie können eine Diagnose stellen und dir geeignete Behandlungsmöglichkeiten empfehlen. 2. I…
Ich hatte immer das Gefühl, dass mein Körper sich sehr unwohl fühlt und ich habe alle möglichen seltsamen Symptome, aber die Ärzte sagen, dass ich bei guter Gesundheit bin, was mich sehr ängstlich und hilflos macht.	Es tut mir leid zu hören, dass Sie sich unwohl fühlen und seltsame Symptome verspüren. Es kann frustrierend sein, wenn Ärzte keine konkreten Diagnosen stellen können. Es ist wichtig zu beachten, dass es verschiedene mögliche Gründe für ungewöhnliche Symptome geben kann, auch wenn alle Ihre Untersuchungsergebnisse in Ordnung sind. Hier sind einige mögliche Ansätze, die Ihnen helfen könnten: 1. Suc…
Aufgrund der langfristigen Anspannung leidet Huang Xiaoming häufig unter Schlaflosigkeit und verliert völlig das Gefühl für Tag und Nacht.	Es tut mir leid zu hören, dass Huang Xiaoming unter Schlaflosigkeit leidet. Schlafprobleme können sehr belastend sein. Es gibt jedoch einige Maßnahmen, die er ergreifen kann, um seine Schlafqualität zu verbessern: 1. Einen regelmäßigen Schlafrhythmus entwickeln: Es ist wichtig, zur gleichen Zeit ins Bett zu gehen und aufzuwachen, auch an Wochenenden. 2. Eine beruhigende Abendroutine etablieren: V…
Meine Beziehung zu meinen Freunden war schon immer nicht sehr gut, und ich finde es schwierig, echte Freunde zu finden. Das macht mich sehr einsam.	Es tut mir leid zu hören, dass du dich einsam fühlst und Schwierigkeiten hast, echte Freunde zu finden. Freundschaften können manchmal herausfordernd sein, aber es gibt Möglichkeiten, deine Chancen zu verbessern, eine tiefere Verbindung zu anderen aufzubauen. 1. Selbstreflexion: Überprüfe deine eigenen Verhaltensweisen und möglicherweise negative Denkmuster, die sich auf deine Beziehungen auswirk…
Die Leute um mich herum denken immer, dass ich zu nervös bin und mir über Kleinigkeiten Sorgen mache. Wie kann ich mich entspannen?	Es gibt verschiedene Möglichkeiten, sich zu entspannen und mit Nervosität umzugehen. Hier sind einige Vorschläge: 1. Tiefes Atmen: Atme langsam und tief ein und aus. Konzentriere dich auf deinen Atem und versuche, deine Gedanken zur Ruhe zu bringen. 2. Körperliche Aktivität: Regelmäßige Bewegung kann dazu beitragen, Stress abzubauen und die Stimmung zu verbessern. Finde eine Aktivität, die dir Sp…
Meine Schlaflosigkeit zwingt mich, jeden Abend einen Psychiater aufzusuchen	Es tut mir leid zu hören, dass Sie unter Schlaflosigkeit leiden. Es ist wichtig, professionelle Hilfe zu suchen, um das Problem anzugehen. Ein Psychiater kann Ihnen dabei helfen, die Ursachen Ihrer Schlafprobleme zu ermitteln und eine geeignete Behandlung vorzuschlagen. Es ist jedoch möglicherweise nicht notwendig, jeden Abend einen Psychiater aufzusuchen. In den meisten Fällen sind regelmäßige S…
Ich habe das Gefühl, dass ich dem Druck der Familie und der Gesellschaft nicht standhalten kann und dass ich viele Dinge nicht erreichen kann	Es tut mir leid zu hören, dass du dich unter Druck gesetzt fühlst und das Gefühl hast, den Erwartungen deiner Familie und der Gesellschaft nicht gerecht zu werden. Es ist wichtig zu realisieren, dass du nicht alle Erwartungen erfüllen musst und dass deine eigene Zufriedenheit und Gesundheit Priorität haben sollten. Hier sind ein paar Tipps, um damit umzugehen: 1. Analysiere die Quelle des Drucks:…
Ich habe das Gefühl, dass sich meine Beziehungen verschlechtern, weder Familie noch Freunde vertrauen mir oder unterstützen mich mehr, ich fühle mich so verloren und hoffnungslos.	Es tut mir leid zu hören, dass du dich so verloren und hoffnungslos fühlst. Beziehungen sind komplex und können sich im Laufe der Zeit verändern. Es könnte hilfreich sein, darüber nachzudenken, was in deinen Beziehungen möglicherweise schief gelaufen ist oder sich verändert hat. Vielleicht könntest du versuchen, mit den betroffenen Personen offen und ehrlich über deine Gefühle und Sorgen zu sprec…
Ich fühle mich oft nicht in der Lage, meine Emotionen und mein Verhalten zu kontrollieren und verhalte mich oft impulsiv oder gewalttätig.	Es tut mir leid zu hören, dass du dich manchmal frustriert oder hilflos fühlst, wenn es darum geht, deine Emotionen und dein Verhalten zu kontrollieren. Es klingt so, als ob du irgendeine Form der Hilfe oder Unterstützung benötigst. Hier sind ein paar Vorschläge, die dir helfen könnten: 1. Suche professionelle Unterstützung: Ein Therapeut oder Psychologe kann dir helfen, die Ursachen für deine Im…
Ich habe oft Angst davor, abgelehnt zu werden, deshalb sage ich selten meine Meinung	Es ist verständlich, dass das Gefühl der Angst vor Ablehnung dazu führen kann, dass man sich zurückhält und seine Meinung nicht oft sagt. Es ist wichtig zu bedenken, dass jeder das Recht hat, seine eigene Meinung zu haben und auszudrücken. Hier sind ein paar Tipps, die dir helfen könnten: 1. Selbstreflexion: Versuche herauszufinden, warum du Angst vor Ablehnung hast. Bist du unsicher über deine M…
Im Teenageralter beginnt sich eine Depression langsam zu entwickeln	Es tut mir leid zu hören, dass du dich in einer schwierigen Situation befindest. Es ist wichtig zu verstehen, dass Depression eine ernsthafte Erkrankung ist, die professionelle Hilfe erfordert. Als dein virtueller Assistent kann ich dir zwar einige Tipps geben, aber ich empfehle dir dringend, mit einem vertrauenswürdigen Erwachsenen oder einem Fachmann darüber zu sprechen. Hier sind einige allgem…
Ich bin mit meinem Aussehen und meinem Körper unzufrieden, fühle mich nicht perfekt und fühle mich oft ängstlich und unsicher	Es tut mir leid zu hören, dass du unzufrieden mit deinem Aussehen und deinem Körper bist. Diese Gefühle sind leider nicht ungewöhnlich, da viele Menschen ähnliche Sorgen haben. Es ist wichtig zu bedenken, dass Perfektion nicht existiert und jeder von uns einzigartig ist. Um mit diesen Gefühlen umzugehen, gibt es einige hilfreiche Schritte, die du unternehmen könntest: 1. Selbstakzeptanz: Versuche…
Ich habe immer Angst, dass das, was ich tue, nicht gut genug ist, auch wenn andere mich gelobt haben, kann ich meine Sorgen nicht loslassen	Es ist verständlich, dass du solche Sorgen hast, auch wenn andere dich bereits gelobt haben. Das Gefühl, nicht gut genug zu sein, kann schwierig sein und viele Menschen kämpfen damit. Es ist wichtig, daran zu denken, dass Perfektion nicht realistisch ist und jeder Fehler macht. Hier sind ein paar Schritte, die dir vielleicht helfen können, deine Sorgen loszulassen: 1. Erkenne deine Gedanken an: W…
Es fiel mir immer schwerer, mich zu konzentrieren, egal ob beim Lesen oder beim Erledigen von Dingen, ich ließ mich leicht ablenken	Es kann frustrierend sein, wenn es schwierig ist, sich zu konzentrieren und leicht abgelenkt zu werden. Hier sind einige Tipps, die dir helfen könnten: 1. Schaffe eine ruhige und aufgeräumte Umgebung: Versuche, einen Ort zu finden, an dem du ohne Ablenkungen arbeiten oder lesen kannst. Ordne dein Arbeits- oder Lesematerial so an, dass es aufgeräumt und organisiert ist. Eine saubere und ordentlich…
Ich habe immer das Gefühl, keinen Wert zu haben, ich weiß nicht, was der Sinn meiner Existenz ist, und ich fühle mich jeden Tag leer und hilflos.	Es tut mir leid zu hören, dass Sie sich so fühlen. Es ist wichtig zu beachten, dass viele Menschen sich von Zeit zu Zeit leer oder wertlos fühlen können. Wenn dies jedoch zu einem dauerhaften Zustand wird, kann es hilfreich sein, darüber mit einer vertrauenswürdigen Person zu sprechen, wie zum Beispiel einem Freund, Familienmitglied oder einem Therapeuten. Eine Möglichkeit, sich besser zu fühlen,…
Ich hatte Angst davor, mit Menschen zu interagieren, hatte Angst davor, abgelehnt, verspottet oder missverstanden zu werden, und ich fühlte mich oft allein und hilflos.	Es tut mir leid zu hören, dass du diese Ängste und negative Gefühle erlebst. Soziale Ängste können sehr belastend sein, aber es gibt Schritte, die du unternehmen kannst, um damit umzugehen und dich wohler in sozialen Situationen zu fühlen. 1. Akzeptanz: Es ist wichtig anzuerkennen, dass soziale Ängste normal sind und viele Menschen damit kämpfen. Du bist nicht allein mit deinen Gefühlen. 2. Selbs…
Ich war mit meinem Aussehen und meiner Figur sehr unzufrieden, fühlte mich hässlich und unattraktiv. Ich dachte oft darüber nach, mich einer Schönheitsoperation zu unterziehen und abzunehmen, machte mir aber auch Sorgen über die Risiken einer Operation und hatte Angst, von anderen lächerlich gemacht und abgelehnt zu werden.	Es ist verständlich, dass du mit deinem Aussehen unzufrieden bist und darüber nachdenkst, etwas daran zu ändern. Es ist wichtig, dass du dich in deinem eigenen Körper wohl fühlst. Vor einer Entscheidung wie einer Schönheitsoperation oder einer Gewichtsabnahme ist es jedoch ratsam, andere Optionen zu prüfen und gründlich darüber nachzudenken. Bevor du dich für eine Operation entscheidest, könntest…
Ich bleibe oft lange auf und mache beruflich Überstunden, wodurch sich meine körperliche Verfassung immer weiter verschlechtert, aber ich kann nicht damit aufhören, weil ich das Gefühl habe, dass ich nur auf diese Weise meinen Wert und meine Fähigkeiten unter Beweis stellen kann	Es ist verständlich, dass du das Bedürfnis hast, deine Fähigkeiten unter Beweis zu stellen und deinen Wert zu zeigen. Es ist jedoch wichtig, darauf zu achten, dass dies nicht auf Kosten deiner Gesundheit und Wohlbefindens geschieht. Regelmäßige Überstunden und ein ungesunder Lebensstil können zu langfristigen negativen Auswirkungen auf deine körperliche und geistige Gesundheit führen. Es ist wich…
Ich habe das Gefühl, dass ich immer süchtiger nach Spielen und sozialen Medien werde, als ob diese Dinge zu einem integralen Bestandteil meines Lebens geworden wären. Diese Abhängigkeit gibt mir das Gefühl, nicht in der Lage zu sein, mich daraus zu befreien und mich selbst zu verlieren. Ich hoffe, einen Weg zu finden, sie loszuwerden diese Abhängigkeit Methoden.	Es ist verständlich, sich besorgt über eine mögliche Abhängigkeit von Spielen und sozialen Medien zu fühlen. Hier sind einige mögliche Methoden, um damit umzugehen: 1. Erkenntnis: Die Tatsache, dass du dir bewusst bist, dass du abhängig bist und etwas ändern möchtest, ist bereits ein wichtiger erster Schritt. 2. Setze klare Ziele: Definiere, was du erreichen möchtest und setze dir klare Ziele für…
Es störte mich, dass meine Stimmung immer auf und ab war, manchmal war ich sehr glücklich, und manchmal war ich so deprimiert, dass ich mich sogar umbringen wollte.	Es tut mir leid zu hören, dass du eine so schwankende Stimmung hast und dass du manchmal sogar Selbstmordgedanken hattest. Es ist wichtig, darüber zu sprechen und Unterstützung zu suchen. Ich empfehle dir dringend, dich mit einem mentalen Gesundheitsexperten, einem Psychologen oder einem Therapeuten in Verbindung zu setzen. Sie können dir helfen, deine Stimmungsschwankungen besser zu verstehen un…
Manchmal habe ich das Gefühl, dass niemand sich um mich kümmert und dass ich der einzige Mensch bin, auf den ich mich wirklich verlassen kann.	Es tut mir leid, dass du dich so fühlst. Es ist normal, gelegentlich das Bedürfnis nach Unterstützung und Fürsorge zu haben. Es kann jedoch auch dazu führen, dass man sich alleine fühlt, wenn man das Gefühl hat, dass niemand da ist, der einem nahe steht. Es gibt jedoch einige Dinge, die du tun kannst, um dies zu ändern. 1. Sprich mit anderen: Teile deine Gefühle, Sorgen und Bedürfnisse mit Mensch…
In letzter Zeit leide ich oft unter Schlaflosigkeit und wälze mich nachts ständig im Bett hin und her. Könnte das ein zugrunde liegendes psychologisches Problem sein?	Es ist möglich, dass Schlaflosigkeit auf ein zugrunde liegendes psychologisches Problem hinweist. Stress, Angst, Depressionen, posttraumatische Belastungsstörungen und andere psychische Erkrankungen können sich negativ auf den Schlaf auswirken. Es könnte auch sein, dass bestimmte Lebenssituationen oder täglicher Stress Ihre Fähigkeit zu entspannen und einzuschlafen beeinträchtigen. Es wäre empfeh…
Mein Verhältnis zu meiner Familie war noch nie gut, ich habe das Gefühl, dass sie mich nicht verstehen, mich nicht respektieren, ich fühle mich dadurch einsam	Es tut mir leid zu hören, dass Sie sich einsam in Ihrer Familie fühlen. Es kann frustrierend sein, das Gefühl zu haben, von den Menschen, die einem am nächsten stehen sollten, nicht verstanden oder respektiert zu werden. Hier sind einige Schritte, die Sie unternehmen können, um Ihre Situation zu verbessern: 1. Kommunikation: Versuchen Sie, offen und ehrlich mit Ihrer Familie zu sprechen, um Ihre …
Ich fühle mich oft innerlich leer und einsam und suche nach Dingen, um dieses Gefühl zu füllen, finde aber oft keine geeignete Möglichkeit, um diese Emotion zu lindern.	Es tut mir leid zu hören, dass du dich oft innerlich leer und einsam fühlst. Es ist wichtig zu verstehen, dass ich als KI-Assistent kein Ersatz für professionelle Hilfe oder menschliche Interaktion bin. Dennoch kann ich dir einige allgemeine Vorschläge geben, um dieses Gefühl zu lindern: 1. Suche nach Unterstützung: Sprich mit engen Freunden, Familienmitgliedern oder einem Therapeuten über deine …
