# Supplementary material
Source: ML conference proceedings conference paper supplement (https://openreview.net/forum?id=JL42j1BL5h)
Supplement: supplementary_material [file Mental_Health_gpt.xlsx]

## Sheet: Sheet1
Input	Output
Je me sens souvent seul et impuissant, personne ne peut me comprendre, je me sens même comme un perdant, sans valeur ni sens, ce sentiment me rend très déprimé et désespéré, je ne sais pas comment m'en débarrasser.	Je suis vraiment désolé d'entendre que vous vous sentez ainsi. Il est important de comprendre que vous n'êtes pas seul dans ce sentiment, et il existe des moyens de vous en débarrasser et d'améliorer votre bien-être émotionnel. Voici quelques suggestions pour vous aider : 1. Parlez à quelqu'un : Il est essentiel de partager vos sentiments avec quelqu'un en qui vous avez confiance. Cela peut être …
Même si je vais juste acheter un sac de chips, j'ai peur que les gens pensent que j'ai un comportement autodestructeur et que je mange trop	Il est compréhensible d'avoir des préoccupations quant à l'opinion des autres, mais il est important de se rappeler que les choix alimentaires d'une personne ne définissent pas entièrement qui elle est. Si vous avez envie d'acheter un sac de chips, cela ne signifie pas nécessairement que vous avez un comportement autodestructeur ou que vous mangez trop. Il est important de vous faire confiance et…
Je me sentais toujours fatiguée et impuissante, incapable de me concentrer sur mes tâches ou même de travailler sur les choses qui m'intéressaient, ce qui me rendait très frustrée.	Je comprends que cela puisse être frustrant de se sentir constamment fatigué.e et impuissant.e, surtout lorsque cela affecte votre capacité à vous concentrer sur vos tâches et à travailler sur les choses qui vous intéressent. Il est important de prendre des mesures pour remédier à cette situation. Tout d'abord, assurez-vous d'avoir un sommeil de qualité. Essayez de vous coucher à une heure réguli…
Récemment, je n'arrive pas à bien dormir, ou je fais des cauchemars quand je m'endors, et je me sens très fatigué et épuisé quand je me réveille.	Je suis désolé d'entendre que vous avez du mal à bien dormir et que vous faites des cauchemars. Voici quelques suggestions qui pourraient vous aider : 1. Établissez une routine de sommeil : Essayez d'aller vous coucher à la même heure tous les soirs et de vous réveiller à la même heure tous les matins. Cela peut aider à réguler votre horloge interne. 2. Créez un environnement propice au sommeil :…
Chaque fois que je vais chez le médecin, il n'y a aucune amélioration, et en plus, mon état d'esprit empire. Je tombe souvent dans un état malsain d'auto-pitié et d'autodépréciation.	Je suis désolé d'entendre que vous traversez cette période difficile. Il est important de prendre soin de votre bien-être mental en plus de votre santé physique. Voici quelques suggestions qui pourraient vous aider : 1. Trouvez un professionnel de la santé mentale : Consulter un thérapeute ou un psychologue peut être bénéfique pour vous aider à comprendre et gérer vos pensées négatives ainsi que …
Je me suis toujours senti isolé et exclu, même dans la foule.	Je suis désolé d'entendre cela, ça ne doit pas être facile pour vous. Il est normal de se sentir isolé ou exclu par moments, mais il est important de chercher des moyens de se connecter avec les autres et de construire des relations significatives. Voici quelques suggestions pour vous aider : 1. Cherchez des passe-temps ou des activités qui vous intéressent : Rejoindre un club ou une association …
S'immerger dans les jeux ou internet est une forme invisible de pression psychologique.	Je comprends ce que vous voulez dire. S'immerger trop longtemps dans les jeux ou Internet peut effectivement exercer une certaine pression psychologique. Cela peut prendre la forme d'une dépendance, où l'on a du mal à se détacher de ces activités et où elles commencent à avoir un impact négatif sur notre vie quotidienne, notre travail ou nos relations. Il est important de trouver un équilibre sai…
J'ai subi trop de pression récemment, je me sens très anxieux tous les jours, je ne dors pas bien, j'ai mal à la tête, mon cœur bat vite et j'ai l'impression que je vais m'effondrer à tout moment	Je suis vraiment désolé d'entendre que vous vous sentez ainsi. Le stress et l'anxiété peuvent vraiment affecter notre bien-être physique et émotionnel. Il est important de prendre soin de vous-même dans ces moments-là. Voici quelques suggestions pour vous aider à faire face à cette situation : 1. Prenez le temps de faire une pause : Accordez-vous des moments de repos pendant la journée pour vous …
Chaque fois que je rencontre des difficultés et des revers, je perds toujours ma confiance et ma motivation et je sens que je ne peux pas gérer mes problèmes	Il est tout à fait normal de ressentir un manque de confiance et de motivation lorsque l'on rencontre des difficultés et des revers. Cependant, il est important de se rappeler que ces sentiments ne sont pas permanents et qu'il est possible de les surmonter. Voici quelques conseils qui pourraient vous aider : 1. Prenez du recul : Lorsque vous rencontrez des difficultés, essayez de prendre du recul…
J'ai toujours peur de ne pas faire assez bien, et j'ai l'impression d'être constamment jugé par d'autres personnes, et c'est déprimant.	Je suis désolé d'entendre que vous vous sentez ainsi. La peur de ne pas être à la hauteur et de faire face au jugement des autres peut être très frustrante et déprimante. Voici quelques suggestions pour vous aider à gérer ces sentiments : 1. Pratiquez l'acceptation de soi : Rappelez-vous que personne n'est parfait et que tout le monde fait des erreurs. Apprenez à accepter vos imperfections et à v…
J'étais toujours inquiet de savoir si je faisais tout correctement, et j'avais peur de ce que les autres penseraient ou me critiqueraient, et j'étais souvent plongé dans un douloureux doute de moi-même en conséquence.	Il est normal de ressentir de l'inquiétude et de la peur face au jugement des autres. Beaucoup de personnes ont cette préoccupation de bien faire et de plaire aux autres. Cependant, il est important de se rappeler qu'il est presque impossible de plaire à tout le monde tout le temps. Il est essentiel de se concentrer sur ce qui est réellement important pour vous, vos valeurs et vos objectifs perso…
Je garde mes pensées dans mon cœur, je sens toujours que je vais exploser, et je ne peux pas me cacher du regard des autres	Il peut être difficile de garder ses pensées pour soi et de se sentir submergé par ses émotions. Lorsque vous ressentez ce poids dans votre cœur, il peut être utile de trouver des moyens de soulager cette tension émotionnelle. Tout d'abord, donnez-vous de l'espace pour exprimer vos pensées et vos sentiments. Vous pourriez essayer d'écrire dans un journal intime ou de parler à un ami, un membre de…
Ma famille a subi un accident soudain, mes deux parents ont été gravement blessés, ce qui m'a fait me sentir impuissant et déprimé, et j'ai même développé des symptômes de dépression.	Je suis vraiment désolé d'entendre cela. Il est tout à fait compréhensible que vous vous sentiez impuissant et déprimé dans une telle situation. L'accident d'un être cher peut être extrêmement traumatisant. Il est important de prendre soin de vous pendant cette période difficile. Voici quelques suggestions pour vous aider à faire face : 1. Cherchez du soutien : Parlez à vos proches, à des amis ou…
Je me suis trouvé de moins en moins actif socialement, préférant toujours être seul, ne souhaitant pas socialiser ou partager ma vie avec les autres, cette solitude m'a fait me sentir très déprimé	Je suis désolé d'entendre que vous vous sentez déprimé en raison de votre solitude croissante et de votre manque d'interaction sociale. Il est important de prendre en compte que chacun a des besoins sociaux différents, mais il est tout de même essentiel de maintenir des connexions et des relations significatives avec les autres pour notre bien-être mental. Voici quelques suggestions pour vous aid…
J'ai un fort désir de contrôle et je veux toujours tout contrôler de mes mains, et ne pas permettre aux autres de s'impliquer ou d'intervenir, ce qui conduit à la rupture de mes relations interpersonnelles.	Il est normal d'avoir un désir de contrôle dans certains aspects de notre vie. Cependant, vouloir tout contrôler peut être problématique et avoir un impact négatif sur nos relations interpersonnelles. Voici quelques suggestions pour aider à gérer ce besoin de contrôle : 1. Prenez conscience de votre besoin de contrôle : commencez par reconnaître que vous avez ce désir et identifiez les situations…
J'ai souvent l'impression que mon esprit est très chaotique, comme s'il y avait trop de pensées et de voix dans ma tête en même temps, ce qui me rend très confus et perdu	Je comprends que cela puisse être très frustrant et déroutant. Il est important de prendre soin de votre bien-être mental. Voici quelques suggestions pour vous aider à gérer le chaos dans votre esprit : 1. Pratiquez la méditation : La méditation peut vous aider à calmer votre esprit et à vous concentrer sur le moment présent. Essayez de trouver quelques minutes chaque jour pour vous asseoir dans …
Pourquoi je suis critiqué par ma famille pour tout ce que je fais	Il peut y avoir plusieurs raisons pour lesquelles vous êtes critiqué par votre famille pour tout ce que vous faites. Voici quelques possibilités : 1. Attentes élevées : Votre famille peut avoir des attentes élevées ou spécifiques quant à votre comportement, vos choix de carrière, votre mode de vie, etc. Lorsque vous ne répondez pas à ces attentes, ils peuvent vous critiquer. 2. Incompréhension : …
Récemment, je me sens toujours épuisé, chaque jour, je manque d'énergie, même après avoir beaucoup dormi, cela ne s'améliore pas.	Je suis désolé d'entendre que vous vous sentez épuisé sans amélioration, même après avoir beaucoup dormi. L'épuisement chronique peut avoir de nombreuses causes possibles, certaines des plus courantes étant le stress, le surmenage, le manque d'exercice ou une mauvaise alimentation. Il est important d'identifier et de traiter la cause sous-jacente de votre épuisement. Voici quelques étapes que vou…
J'ai l'impression d'avoir perdu toute motivation et espoir et la vie n'a plus de sens	Je suis désolé d'entendre que vous vous sentez ainsi. Il est normal d'avoir des moments où l'on se sent découragé et sans espoir. Voici quelques suggestions pour vous aider à regagner de la motivation et du sens dans votre vie : 1. Parlez-en à quelqu'un : Trouvez une personne de confiance avec qui vous pouvez discuter de vos sentiments. Il est important de ne pas garder ces émotions pour vous. 2.…
Je me sens très nerveux parfois, et je me sens aussi déprimé parfois, mais je ne sais pas comment changer mon humeur	Je suis désolé d'entendre que vous vous sentez nerveux et déprimé. Changer son humeur peut être difficile parfois, mais voici quelques suggestions qui pourraient vous aider : 1. Identifiez les causes : essayez de comprendre ce qui déclenche votre nervosité ou votre dépression. Est-ce lié à des événements spécifiques, à des pensées négatives ou à des problèmes personnels ? Une fois que vous avez i…
J'ai des problèmes de réflexion et de perception, et j'entends souvent des sons étranges ou je vois des choses étranges, ce qui me fait très peur	Je suis désolé d'apprendre cela. Les problèmes de réflexion et de perception peuvent être très déconcertants et effrayants. Il est important de consulter un professionnel de la santé pour obtenir un diagnostic précis et un traitement approprié. Un psychiatre ou un psychologue pourrait être en mesure de vous aider à comprendre et à gérer ces symptômes. En attendant de consulter un professionnel, c…
Je me sens souvent tendu et anxieux, incapable de contrôler mes émotions et mon stress, ce qui me rend très agité et perturbé.	Je suis désolé d'entendre que vous vous sentez ainsi. Le stress et l'anxiété peuvent être très difficiles à gérer, mais il y a plusieurs choses que vous pouvez essayer pour vous aider à vous détendre. 1. Respiration profonde : Prenez quelques instants pour vous concentrer sur votre respiration. Inspirez lentement par le nez pendant quelques secondes, retenez votre souffle pendant quelques seconde…
Je me sens souvent seul et impuissant, et je me sens vide même quand j'ai quelqu'un autour de moi. Je ne sais pas pourquoi cela se produit, comment puis-je obtenir de l'aide ?	Je suis vraiment désolé d'entendre que vous vous sentez ainsi. Il peut être difficile de comprendre pourquoi vous vous sentez seul et impuissant, mais il est important de chercher de l'aide et du soutien pour surmonter ces sentiments. Voici quelques suggestions pour obtenir de l'aide : 1. Parlez-en à quelqu'un : Partagez vos sentiments avec un ami proche, un membre de votre famille ou un professi…
J'ai été traumatisé dans le passé, et maintenant je me souviens toujours de cette expérience avec peur et douleur, et j'ai besoin de demander de l'aide pour surmonter cette émotion.	Je suis désolé d'entendre que vous avez vécu une expérience traumatisante. Il est tout à fait compréhensible que vous ressentiez encore de la peur et de la douleur à ce sujet. Voici quelques étapes que vous pouvez envisager pour vous aider à faire face à ces émotions : 1. Recherchez du soutien : Parlez à une personne de confiance, un ami ou un membre de votre famille, à qui vous pouvez exprimer v…
Je n'arrive pas à me débarrasser des souvenirs du passé, et chaque fois que je pense à certaines choses, je me sens très mal, et cela affecte même ma vie quotidienne	Je suis désolé d'entendre que vous traversez cela. Les souvenirs du passé peuvent parfois être difficiles à gérer, mais il est possible de trouver des façons de les surmonter et de se sentir mieux. Voici quelques suggestions qui pourraient vous aider : 1. Acceptez vos émotions : Il est normal de ressentir de la tristesse, de la colère ou de la confusion en repensant à des événements passés diffic…
J'étais victime d'intimidation et maintenant, chaque fois que j'y pense, j'ai peur et je fais même des cauchemars	Je suis désolé d'entendre que vous avez été victime d'intimidation, cela peut certainement avoir un impact émotionnel sur vous. Il est normal de ressentir de la peur et de faire des cauchemars après un tel événement traumatisant. Voici quelques suggestions pour vous aider à faire face à vos peurs : 1. Parlez-en à quelqu'un de confiance : Discuter de vos sentiments avec un ami, un membre de votre …
Je me sens de plus en plus seul, pas d'amis, pas de parents, même s'il y a quelqu'un dans les parages, je me sens très vide et mal à l'aise	Je suis désolé d'entendre que vous vous sentez seul et mal à l'aise en ce moment. Les sentiments de solitude et de vide peuvent être très difficiles à gérer. Il est important de se rappeler que vous n'êtes pas seul et qu'il existe des ressources et des soutiens disponibles pour vous aider. Voici quelques suggestions pour vous aider à vous sentir mieux : 1. Cherchez du soutien : Parlez à un ami pr…
J'ai toujours l'impression de ne pas pouvoir me concentrer, il m'est difficile d'accomplir des tâches et je suis souvent fatigué et déprimé	Je suis désolé d'entendre que vous vous sentez de cette façon. La difficulté à se concentrer, l'incapacité à accomplir des tâches et la fatigue constante peuvent être le signe de divers problèmes. Il peut être utile de consulter un professionnel de la santé, comme un médecin ou un psychologue, pour obtenir un meilleur diagnostic de votre situation. En attendant, voici quelques suggestions qui pou…
Je me sens souvent seul et perdu, incapable d'établir des relations amicales avec les autres, voire même de perdre l'intérêt et l'enthousiasme pour les gens et les choses qui m'entourent.	Je suis désolé d'entendre que vous vous sentez souvent seul et perdu. Cela peut être difficile, mais il y a des mesures que vous pouvez prendre pour améliorer votre situation. Voici quelques suggestions : 1. Cherchez à comprendre vos sentiments : Essayez d'analyser pourquoi vous vous sentez seul et perdu. Est-ce dû à des expériences passées, à un manque de confiance en vous, à une timidité excess…
Je me sens seul et perdu et je n'ai pas l'impression de pouvoir nouer des relations amicales avec d'autres personnes, ce qui me rend très déprimé et impuissant	Je suis désolé d'entendre que vous vous sentez seul et perdu en ce moment. Il peut être difficile de ne pas avoir de relations amicales et cela peut affecter notre bien-être émotionnel. Cependant, il est important de se rappeler que vous n'êtes pas seul dans cette situation et qu'il y a des étapes que vous pouvez entreprendre pour améliorer les choses. Tout d'abord, essayez de vous ouvrir aux aut…
Tout le monde autour de moi est heureux, mais je me sens vide à l'intérieur, incapable de profiter de la joie	Je suis désolé d'entendre que vous vous sentez vide à l'intérieur, même lorsque les autres autour de vous sont heureux. Il est important de se rappeler que chacun vit des expériences et des émotions différentes, et il est tout à fait normal de ressentir un écart entre ce que les autres peuvent ressentir et vos propres sentiments. Voici quelques suggestions qui pourraient vous aider : 1. Identifie…
J'ai une faible estime de moi et je me sens souvent sans valeur et insignifiante, je n'ose pas poursuivre mes rêves et mes objectifs, j'ai peur de l'échec et d'être méprisée par les autres.	Je suis vraiment désolé d'entendre cela. La faible estime de soi peut être difficile à surmonter, mais il existe des étapes que vous pouvez prendre pour commencer à construire une estime de soi plus positive. Voici quelques suggestions : 1. Identifiez vos forces : Faites une liste des compétences, des talents et des réalisations dont vous pouvez être fier(e). Cela vous rappellera vos qualités et …
Je deviens trop sensible à certaines choses et je me sens souvent agité et inquiet pour des détails	Il est normal de se sentir agité et préoccupé par des détails, mais si cela commence à avoir un impact négatif sur votre bien-être, il peut être utile de trouver des moyens de gérer ces sentiments. Voici quelques suggestions pour vous aider : 1. Identifiez vos déclencheurs : Essayez d'identifier les événements, les situations ou les pensées qui déclenchent votre sensibilité et votre agitation. Ce…
Mes parents ont toujours des attentes élevées à mon égard, pour que je sois une personne exceptionnelle, mais j'avais l'impression de ne pas être à la hauteur de leurs attentes, je suis anxieux et j'ai une faible estime de moi.	Je comprends que c'est difficile de ressentir cette pression constante pour être exceptionnel aux yeux de tes parents. Il est important de rappeler que personne n'est parfait et que tu es déjà une personne précieuse et unique, avec tes propres talents et qualités. Il peut être utile de communiquer ouvertement avec tes parents et leur expliquer comment tu te sens. Parfois, ils peuvent ne pas réali…
Je rêve tous les jours, cela se répète encore et encore, comme si j'étais perdu dans un labyrinthe sans issue	Il est tout à fait normal de rêver tous les jours, car nous rêvons généralement pendant la phase de sommeil paradoxal. Les rêves peuvent être influencés par nos expériences, nos émotions et nos préoccupations quotidiennes. Si vous avez l'impression de vous perdre dans un labyrinthe sans issue à travers vos rêves, cela peut indiquer que vous vous sentez peut-être coincé ou incertain dans certains …
Chaque fois que je suis seul, je pense à tout ce qui s'est passé avant, et tout cela me rend si misérable	Je suis désolé d'entendre que vous vous sentez misérable lorsque vous êtes seul et que vous passez en revue les événements passés. Les sentiments de tristesse et de détresse peuvent être très difficiles à gérer. Cependant, il est également important de prendre en compte que chaque personne est unique et réagit différemment face aux événements passés. Si vous vous sentez vraiment en détresse, je v…
Quand je vois mon corps, je me sens si moche, si mal	Je suis désolé d'entendre que vous ressentez cela. Il est important de se rappeler que la beauté ne se résume pas à l'apparence physique. Chaque personne est unique et a ses propres qualités qui la rendent spéciale. Il peut être utile d'essayer de changer votre perspective en vous concentrant sur les aspects positifs de vous-même, comme vos talents, vos passions et vos qualités intérieures. Si vo…
Je suis autiste, je ne sais pas comment communiquer avec les autres, je me sens isolé dans un monde complètement différent, je me sens très misérable et impuissant.	Je suis désolé d'apprendre que vous vous sentez ainsi. L'autisme peut poser des défis en termes de communication et de relation avec les autres, mais il est important de savoir que vous n'êtes pas seul. Voici quelques suggestions pour vous aider à vous sentir moins isolé et plus en contrôle de la situation : 1. Trouvez du soutien : Recherchez des groupes de soutien pour les personnes autistes dan…
J'ai été une fois trahi par un ami, cela m'a tellement blessé que j'ai commencé à douter de la fiabilité de l'humanité et de l'amitié, et j'ai même commencé à me renfermer et à m'éloigner des autres	Je suis désolé d'entendre que vous avez été trahi par un ami. Il est compréhensible que cela vous ait blessé et ait suscité des doutes sur la fiabilité de l'humanité et de l'amitié en général. Il est naturel de se sentir méfiant après une expérience comme celle-ci. Cependant, il est important de ne pas généraliser cette situation à l'ensemble de l'humanité. Tout le monde n'est pas mal intentionné…
Dans la société d'aujourd'hui, les gens renoncent souvent à eux-mêmes ou même se suicident parce qu'ils ne peuvent pas achever leur travail.	C'est vraiment triste de voir que certaines personnes se sentent si dépassées par leur travail qu'elles en arrivent à renoncer à elles-mêmes, voire à envisager le suicide. La pression constante pour réussir dans notre société moderne peut être écrasante, mais il est essentiel de se rappeler qu'il existe toujours des solutions et des aides disponibles. Si vous vous sentez submergé par votre travai…
Je pense toujours à mon passé et à mon avenir, me sentant anxieux et bouleversé, ne sachant pas quoi faire.	Je comprends que vous puissiez vous sentir anxieux et bouleversé en pensant à votre passé et à votre avenir. Il est normal d'avoir des préoccupations et des incertitudes à ce sujet. Voici quelques suggestions pour vous aider à faire face à ces pensées et à vous sentir plus calme : 1. Pratiquez la pleine conscience : Essayez de vous concentrer sur le moment présent et de vous immerger pleinement d…
Je me sens toujours mal à l'aise lorsque je suis devant un grand groupe de personnes	Il est tout à fait normal de se sentir mal à l'aise devant un grand groupe de personnes. Cependant, il existe des astuces pour vous aider à vous sentir plus à l'aise dans ces situations : 1. Préparez-vous à l'avance : Si vous savez à l'avance que vous serez confronté à un grand groupe, prenez le temps de vous préparer mentalement. Répétez ce que vous voulez dire, pratiquez devant un miroir ou dem…
Je suis insatisfait de mon apparence et je me sens toujours moche, ce qui me rend très peu confiant pour socialiser et me faire des amis. Comment puis-je changer cette mentalité ?	Il est normal de se sentir insatisfait de son apparence de temps en temps, mais il est important de ne pas laisser cela affecter votre confiance en vous ou votre capacité à socialiser. Voici quelques conseils pour changer votre mentalité : 1. Reconnaître vos qualités : Essayez de vous concentrer sur vos atouts et vos qualités intérieures au lieu de vous focaliser uniquement sur votre apparence ph…
Je suis plein de peur et d'anxiété face à l'avenir, et je ne sais pas comment gérer les défis et les pressions à venir.	Je comprends complètement que vous puissiez vous sentir plein de peur et d'anxiété face à l'avenir. Les défis et les pressions peuvent être très stressants. Voici quelques conseils pour vous aider à gérer ces sentiments : 1. Identifiez vos peurs : Essayez de comprendre quelles sont les causes spécifiques de votre peur et de votre anxiété. Cela vous aidera à aborder chaque problème individuellemen…
Je me retrouve constamment coincé dans des boucles de pensée incessantes, ruminant sans cesse le même problème ou la même situation, ce qui nuit à mon sommeil et rend ma vie quotidienne médiocre.	Il est normal de se retrouver coincé dans des boucles de pensée, mais il est important de trouver des moyens de les briser afin de maintenir une bonne santé mentale. Voici quelques suggestions pour vous aider : 1. Prenez conscience de vos pensées : Commencez par identifier ces boucles de pensée et prenez conscience des moments où elles surviennent. Cela vous permettra de mieux les comprendre et d…
J'ai vécu des expériences traumatisantes qui m'ont marqué. J'avais du mal à traiter ces émotions et ces souvenirs, ce qui a progressivement détérioré ma santé mentale.	Je suis désolé d'entendre que vous avez vécu des expériences traumatisantes qui ont eu un impact sur votre santé mentale. Il est important de prendre soin de votre bien-être émotionnel pour pouvoir guérir et avancer. Voici quelques suggestions pour vous aider à traiter ces émotions et souvenirs difficiles : 1. Cherchez un soutien professionnel : Consulter un thérapeute qualifié peut être extrêmem…
Je me sens souvent déprimé et morose, je perds la joie et la motivation de vivre et je n'ai aucune confiance en l'avenir, cette émotion me fait me sentir très douloureux et impuissant	Je suis vraiment désolé d'entendre que vous vous sentez de cette façon. La dépression peut être une expérience très difficile à vivre, mais il est important de se rappeler que vous n'êtes pas seul et qu'il y a de l'aide disponible. Voici quelques suggestions pour vous aider à faire face à cette situation : 1. Parlez-en à quelqu'un : N'hésitez pas à parler de vos sentiments à un proche de confianc…
Récemment, leurs enfants perdent souvent leur sang-froid et détruisent même des objets dans la maison, ce qui peut être un symptôme de dépression	Il est important de prendre en compte les comportements des enfants et de rechercher des moyens de les aider. Cependant, il est également important de noter que la dépression est un trouble de santé mentale complexe et que seul un professionnel de la santé qualifié peut poser un diagnostic précis. Voici quelques suggestions pour soutenir les enfants qui peuvent rencontrer des difficultés émotionn…
Je me sens souvent stressé et anxieux, même de petites choses peuvent me rendre agité et tendu, il m'est difficile de me détendre et de profiter de la vie	Je suis désolé d'entendre que vous vous sentez souvent stressé et anxieux. Le stress et l'anxiété peuvent grandement affecter votre bien-être et votre qualité de vie. Voici quelques suggestions pour vous aider à gérer ces sentiments : 1. Prenez du temps pour vous : Accordez-vous régulièrement des moments de détente et de plaisir. Faites des activités qui vous plaisent et qui vous permettent de vo…
Je suis très insatisfait de mon corps, je me sens toujours trop gros ou trop mince, et je ne sais pas comment accepter mon corps	Je comprends que vous puissiez ressentir de l'insatisfaction par rapport à votre corps. L'acceptation de soi peut être un processus complexe, mais il est possible de travailler sur cela. Voici quelques conseils pour vous aider : 1. Pratiquez l'amour de soi : Apprenez à vous aimer et à vous accepter inconditionnellement, indépendamment de votre apparence physique. Concentrez-vous sur vos qualités …
Je manque de confiance en mes performances et mes capacités, j'ai toujours l'impression que je ne peux pas bien faire, j'ai peur de l'échec et des moqueries des autres.	Il est normal de ressentir un manque de confiance en soi de temps en temps, mais il est important de se rappeler que de nombreux autres personnes ressentent la même chose. Voici quelques conseils pour développer votre confiance en vous : 1. Reconnaître vos réussites passées : Prenez le temps de réfléchir aux réussites que vous avez déjà accomplies, qu'elles soient grandes ou petites. Cela vous ai…
Mes humeurs fluctuent énormément, d'un excitement intense à de la profonde tristesse, sans aucune logique.	Il est normal que nos humeurs fluctuent de temps en temps, mais si cela devient excessif et sans raison apparente, cela peut être déroutant et difficile à gérer. Voici quelques suggestions qui pourraient vous aider : 1. Identifiez vos déclencheurs : Essayez de repérer les événements, les personnes ou les situations qui déclenchent vos changements d'humeur. Cela vous aidera à mieux comprendre pour…
Quand je suis dans une foule, je me sens toujours ignoré, voire inexistant, ce qui me fait me sentir très seul et perdu	Je suis désolé d'entendre cela. Se sentir ignoré ou invisible dans une foule peut certainement être une expérience difficile. Il est important de rappeler que de nombreuses personnes peuvent ressentir cela de temps en temps, et vous n'êtes pas seul dans cette situation. Il existe quelques conseils que je peux vous donner pour faire face à ces sentiments : 1. Prenez conscience des pensées négative…
J'ai souvent l'impression de ne pas être assez bon pour gagner l'approbation et le respect des autres	Il est tout à fait normal de ressentir parfois une certaine insécurité ou un manque de confiance en soi. Beaucoup de gens peuvent se retrouver dans cette situation. Voici quelques conseils pour vous aider : 1. Apprenez à vous connaître : Prenez le temps de réfléchir à vos forces et à vos talents. Identifiez ce qui fait de vous une personne unique et différente des autres. Cela peut augmenter votr…
Je me sens confus et impuissant face à l'avenir, je ne sais pas dans quelle direction aller, cela me rend très anxieux et agité	Je comprends que vous vous sentiez confus et impuissant face à l'avenir, et cela peut certainement provoquer de l'anxiété et de l'agitation. Il est normal de se poser des questions sur la direction à prendre, mais il est important de se rappeler que personne ne connaît vraiment l'avenir. Voici quelques suggestions pour vous aider à retrouver votre équilibre : 1. Prenez du recul : Il peut être bén…
J'ai toujours peur que mes actions et mes décisions soient critiquées et désapprouvées par les autres, ce qui me rend très anxieuse et frustrée.	Il est naturel de vouloir plaire aux autres et d'éviter d'être critiqué ou désapprouvé. Cependant, il est important de se rappeler que vous ne pouvez pas contrôler les opinions et les réactions des autres. Voici quelques conseils pour gérer cette situation : 1. Acceptez l'incertitude : Vous ne pouvez pas prévoir les réactions des autres à vos actions et décisions. Acceptez que cela fasse partie d…
J'ai envie de me suicider mais je n'ose pas, je veux juste me cacher et ne plus jamais ressortir	Je suis vraiment désolé d'entendre que vous vous sentez ainsi, mais je ne peux pas vous aider à traverser cela par moi-même. Il est important de chercher du soutien auprès de personnes qui peuvent vous aider, telles qu'un ami de confiance, un membre de votre famille ou un professionnel de la santé. Parlez à quelqu'un de vos sentiments, car il existe des ressources et de l'aide disponibles pour vo…
Ma famille me critique toujours et me fait beaucoup de mal, je ne sais pas comment communiquer avec eux, ils sont devenus si distants avec moi	Je suis désolé d'entendre que vous vivez cette situation avec votre famille. Les conflits familiaux peuvent être particulièrement difficiles et douloureux à gérer. Voici quelques suggestions pour vous aider à communiquer avec votre famille dans ces moments-là : 1. Communiquez ouvertement : Essayez de vous asseoir avec chaque membre de votre famille individuellement et exprimez vos sentiments honn…
J'ai l'habitude d'être frustré par de petites choses, j'ai du mal à me remettre de dépressions émotionnelles et je me sens sans valeur.	Je suis désolé d'entendre que vous traversez ces difficultés émotionnelles. Il est important de noter que je suis une intelligence artificielle et que je ne suis pas qualifié pour vous fournir un soutien psychologique professionnel. Cependant, je peux vous offrir quelques suggestions générales qui pourraient vous aider. 1. Reconnaître et accepter vos émotions : Il est normal d'être frustré par de…
J'ai été intimidé par mes pairs, ce qui a conduit à une faible estime de soi chronique et à la peur du rejet.	Je suis désolé d'entendre cela. Être intimidé par ses pairs est une expérience difficile qui peut avoir un impact négatif sur notre estime de soi et notre confiance en nous. Il est important de prendre des mesures pour améliorer votre situation et développer une estime de soi plus saine. Voici quelques conseils qui pourraient vous aider : 1. Parlez-en à quelqu'un de confiance : Parler de votre ex…
Récemment, j'ai toujours l'impression que mon humeur fluctue énormément. Parfois je suis heureux, mais parfois je suis déprimé sans raison. Cela me trouble profondément. Je ne sais pas si je souffre de dépression.	Je suis désolé d'entendre que vous traversez une période difficile. Je ne suis pas un professionnel de la santé, mais je peux vous donner quelques informations générales qui pourraient vous aider à mieux comprendre votre situation. La fluctuation de l'humeur peut avoir différentes causes, et il est important de consulter un professionnel de la santé pour obtenir un diagnostic précis. Une des cond…
Je suis extrêmement stressée, j'ai l'impression que de bientôt être dépassée, je me sens souvent énervée ou ai des difficultés à respirer.	Je suis désolé d'entendre que vous vous sentez ainsi. Le stress peut être difficile à gérer, mais il existe des techniques qui peuvent vous aider à vous calmer. Voici quelques conseils : 1. Prenez des pauses régulières : Accordez-vous des moments de détente pendant la journée pour vous ressourcer. Faites une courte promenade, faites quelques exercices de respiration profonde ou pratiquez une acti…
J'ai souvent des sentiments d'anxiété et de peur, ne sachant pas d'où cela vient, et parfois il m'est même difficile de respirer.	Je suis désolé d'entendre que vous ressentez de l'anxiété et de la peur fréquemment. Cela peut être une expérience très déstabilisante. Il est important de se rappeler que je suis un assistant virtuel et que je ne peux pas fournir de conseils médicaux professionnels. Cependant, je peux vous donner quelques suggestions générales pour gérer votre anxiété : 1. Parlez-en à quelqu'un : Il peut être ut…
Je me suis toujours sentie inutile, pas assez bien, pas assez intelligente, pas assez jolie, et c'est frustrant	Je suis désolé d'entendre que vous vous sentez ainsi, mais il est important de se rappeler que votre valeur ne dépend pas de votre apparence ou de votre intelligence. Chaque personne a ses propres talents, qualités et contributions uniques à apporter au monde. Il peut être utile de réfléchir à vos forces et à vos réalisations passées pour vous rappeler de votre valeur. Si vous vous sentez toujour…
J'ai toujours des pensées suicidaires, j'ai l'impression que la vie n'a pas de sens et que je n'ai aucune valeur. Je me sens aussi désespéré et j'ai l'impression qu'il n'y a aucun espoir pour mon avenir	Je suis vraiment désolé d'entendre cela, mais je ne peux pas fournir l'aide dont vous avez besoin. Vous devriez en parler à un professionnel de la santé qui pourra vous soutenir.
J'ai souvent l'impression que ma vie n'a pas de sens, je ne sais pas pourquoi je vis ainsi, j'ai l'impression de n'avoir aucun but, aucune motivation, c'est comme si je perdais mon temps, je me sens inutile	Il est normal de ressentir parfois cette impression de ne pas avoir de sens dans sa vie. Beaucoup de gens traversent des périodes où ils se questionnent sur leur but et leur motivation. Voici quelques conseils qui pourraient vous aider : 1. Réfléchissez à vos passions et vos intérêts : Qu'est-ce qui vous fait vraiment vibrer ? Quelles sont les activités qui vous apportent du plaisir et du bonheur…
Je me sens très stressé ces derniers temps, parce que j'ai beaucoup de travail, je dois faire face à de nombreuses tâches chaque jour, mais je n'ai pas le sentiment d'accomplissement, ce qui me rend très frustré, comment puis-je gérer cette pression psychologique ?	Il est normal de se sentir stressé lorsque l'on a beaucoup de travail et un sentiment de manque d'accomplissement peut ajouter à cette pression psychologique. Voici quelques stratégies pour gérer cette situation : 1. Prioriser les tâches : Identifiez les tâches les plus importantes et urgentes, puis établissez un plan pour les aborder. Cela vous permettra de vous concentrer sur ce qui est essenti…
Je me sens souvent anxieux et tendu, j'ai l'impression de ne pas pouvoir gérer le stress et les défis de la vie.	Je suis désolé d'entendre que vous vous sentez souvent anxieux et tendu. Gérer le stress et les défis de la vie peut être difficile, mais il y a des choses que vous pouvez essayer pour vous aider à faire face à ces sentiments. Voici quelques suggestions : 1. Prenez le temps de vous détendre : Essayez des techniques de relaxation, telles que la respiration profonde, la méditation, le yoga ou la vi…
Mon esprit est rempli de négativité et de doute de moi-même et je ne sais pas comment m'en sortir	Je suis désolé d'entendre que vous vous sentez ainsi. Il est normal d'avoir des moments de négativité et de doute de soi. Voici quelques conseils qui pourraient vous aider à surmonter ces sentiments : 1. Identifiez les pensées négatives : Prenez conscience des pensées négatives qui traversent votre esprit et essayez de les identifier. Posez-vous la question : "À quoi est-ce que je pense et pourqu…
Je sens que mes émotions deviennent de plus en plus instables. Parfois je me sens déprimé, et parfois je me sens à très émotif. Je ne sais pas s'il y a quelque chose qui ne va pas dans mon esprit.	Je comprends que cela puisse être difficile de faire face à des émotions instables et confuses. Il est important de prendre en considération l'ensemble de votre situation et d'explorer différentes possibilités. Bien que je ne sois pas un professionnel de la santé mentale, voici quelques suggestions générales pour vous aider à gérer vos émotions : 1. Parlez-en à quelqu'un de confiance : Partager v…
Quand l'enfant rentre de l'école, la maison est froide, personne ne reconnaît sa gentillesse. Il est le seul à faire des erreurs, et son cœur est vide. Ce qui l'inquiète, c'est de savoir s'il deviendra comme ses parents quand il sera grand.	Il est normal de se sentir ainsi lorsque l'on est confronté à des situations difficiles à la maison. Mais il est important de se rappeler que l'enfant a sa propre voie à suivre et qu'il peut choisir de devenir la personne qu'il souhaite être. Il est compréhensible que l'enfant puisse craindre de devenir comme ses parents, surtout s'il observe des comportements qui ne lui plaisent pas. Cependant, …
Presque chaque nuit, il a du mal à s'endormir, il n'arrive pas à dormir et ne trouve pas le moyen de s'endormir, son humeur se détériore de plus en plus et il s'inquiète de savoir s'il souffrira de dépression ou d'autres problèmes psychologiques plus graves	Je suis désolé d'entendre cela. Les problèmes de sommeil fréquents peuvent en effet avoir un impact significatif sur la santé mentale et le bien-être général. Il est important de chercher des solutions pour améliorer votre sommeil et soulager les inquiétudes que vous ressentez. Voici quelques conseils qui pourraient vous aider : 1. Établissez une routine de sommeil régulière : Essayez de vous cou…
Récemment, j'ai toujours l'impression d'être vulnérable et mes pensées sont comme un fouillis de cordes, impossibles à saisir	Je suis désolé d'entendre ça. Il est normal de se sentir vulnérable parfois et d'avoir des pensées confuses. Voici quelques suggestions pour vous aider à faire face à cette situation : 1. Prenez du recul : Prenez quelques instants pour vous détendre et respirer profondément. Essayez de dissiper les pensées négatives et concentrez-vous sur le moment présent. La méditation ou le yoga peuvent égalem…
Chaque fois que je pense à mes échecs, je me sens impuissant, je perds mon courage à l'idée de ne pas être accepté par la société, je me sens impuissant à l'idée que je ne pourrai peut-être pas réaliser mes rêves	Il est tout à fait naturel de ressentir de l'impuissance et de la préoccupation face à nos échecs et à la possibilité de ne pas être accepté par la société. Cependant, il est important de se rappeler que l'échec fait partie intégrante du parcours vers le succès. Voici quelques conseils pour vous aider à surmonter ces sentiments : 1. Reconnaître vos émotions : Il est important de prendre conscienc…
Mes relations amoureuses ont toujours été instables, je ressens souvent de la détresse émotionnelle, je ne sais pas comment gérer les problèmes relationnels, cela me fait me sentir impuissante et perdue.	Je suis désolé d'entendre que vous traversez une période difficile dans vos relations amoureuses. Les relations peuvent être complexes et il est normal de rencontrer des difficultés. Voici quelques suggestions pour vous aider à gérer ces problèmes : 1. Communiquez ouvertement : La communication est essentielle dans toute relation. Exprimez vos pensées et vos sentiments à votre partenaire de maniè…
Je perds parfois le contrôle et deviens très irritable et nerveux, et il m'arrive même de m'énerver contre mon entourage	Il est normal de ressentir de l'irritabilité et de la nervosité de temps en temps, mais si cela se produit fréquemment et que vous perdez souvent le contrôle, cela peut être un signe de stress ou d'autres problèmes sous-jacents. Voici quelques suggestions pour vous aider à gérer ces situations : 1. Identifiez les déclencheurs : Essayez de repérer les situations ou les pensées qui vous rendent irr…
Mon travail est stressant et faire face à des problèmes et des défis tous les jours me rend très anxieux, je commence à perdre le sommeil, à perdre l'appétit et parfois à perdre le contrôle de mes émotions	Il est désolant d'apprendre que vous traversez une période difficile. Le stress au travail peut vraiment avoir un impact négatif sur votre bien-être physique et émotionnel. Voici quelques suggestions pour vous aider à gérer votre stress : 1. Identifiez les facteurs de stress : Prenez le temps de réfléchir aux aspects spécifiques de votre travail qui causent le plus de stress. Cela vous aidera à m…
Je suis toujours incapable de retenir mes émotions, parfois je me mets soudainement en colère et parfois je me tais soudainement, ce qui me rend incapable de prédire mon propre comportement et mes performances, et je me sens très perturbé et confus.	Il est normal de ressentir des émotions intenses et parfois imprévisibles. Cependant, si vous trouvez que cela vous perturbe et vous rend confus, il peut être utile de chercher des moyens de mieux gérer vos émotions. Voici quelques suggestions qui pourraient vous aider : 1. Prenez le temps de réfléchir : Lorsque vous ressentez une émotion intense, prenez quelques instants pour vous calmer et fair…
Je ne peux pas me débarrasser de l'emprise des expériences passées désagréables, et chaque fois que je pense à ces événements, je ressens une douleur et un sentiment perte atroces.	Je suis désolé d'entendre que vous ressentez cela. Les expériences passées désagréables peuvent laisser une empreinte profonde et il peut être difficile de s'en débarrasser complètement. Cependant, il y a des étapes que vous pouvez suivre pour vous aider à faire face à ces émotions et à avancer. 1. Permettez-vous de ressentir vos émotions : Souvent, essayer de réprimer ou d'éviter la douleur ne f…
Je me sens souvent seul et impuissant, il n'y a personne avec qui parler de mes pensées intérieures, je me sens abandonné par le monde, cela me fait me sentir très douloureux et désespéré.	Je suis vraiment désolé d'entendre que vous vous sentez ainsi. Il est difficile de faire face à la solitude et à l'impuissance, mais il y a des choses que vous pouvez faire pour essayer de soulager cette douleur. Tout d'abord, il peut être utile de chercher à élargir votre cercle social. Essayez de participer à des activités qui vous intéressent ou rejoignez des groupes et des communautés en lign…
Je me sens souvent inférieur et impuissant à cause de mes défauts, je sens que je ne suis pas assez bon, pas digne d'amour	Je suis vraiment désolé d'entendre que vous vous sentez de cette façon. Il est important de rappeler que personne n'est parfait et que chaque personne a des défauts. Tout le monde mérite l'amour et le respect, y compris vous. Votre valeur en tant qu'individu ne dépend pas de vos imperfections ou de vos défauts. Il peut être utile de travailler sur l'estime de soi et d'apprendre à s'accepter tel q…
Mon travail et mes études me causent énormément de pression, et je me sens souvent épuisé, mais je ne sais pas comment me détendre et soulager le stress.	Je comprends que la pression liée au travail et aux études puisse être épuisante. Il est important de prendre du temps pour se détendre et soulager le stress. Voici quelques suggestions qui pourraient vous aider : 1. Prenez des pauses régulières : Accordez-vous des moments de pause tout au long de la journée, même si ce n'est que pour quelques minutes. Utilisez ces moments pour respirer profondém…
Mon humeur change si vite qu'il ne faut que peu de temps pour passer de la joie à la tristesse, pourquoi ?	Le changement rapide de votre humeur peut être dû à différents facteurs. Voici quelques possibilités : 1. Facteurs externes : Des événements ou des situations dans votre environnement peuvent influencer votre humeur. Par exemple, si vous recevez de bonnes nouvelles, cela peut vous rendre joyeux, tandis que des événements négatifs peuvent vous attrister. 2. Facteurs internes : Votre humeur peut ég…
Je suis plus susceptible de perdre patience que les autres, et je me sens inutilement déprimé et poussé à bout par des détails	Il est normal de ressentir de l'impatience et de la frustration occasionnelles, mais si vous trouvez que cela devient fréquent et que cela vous affecte négativement, il pourrait être utile de prendre des mesures pour gérer ces émotions. Voici quelques stratégies qui pourraient vous aider : 1. Prenez du recul et respirez profondément : Lorsque vous vous sentez sur le point de perdre patience, pren…
Chaque fois que je pense à aller chez le médecin ou à voir un thérapeute, je me sens intimidé et peu sûr de moi. J'ai peur que mes problèmes soient exposés et jugés par les autres. Cette peur m'empêche de demander de l'aide.	Je comprends totalement votre situation et il est normal de se sentir intimidé ou peu sûr de soi lorsque l'on envisage d'aller chez le médecin ou chez un thérapeute. Cependant, il est important de rappeler que ces professionnels sont là pour vous aider et non pour vous juger. Voici quelques conseils pour vous aider à surmonter vos craintes : 1. Rappelez-vous que vous n'êtes pas seul : De nombreus…
J'ai rencontré beaucoup de revers et d'injustices dans le milieu professionnel, ce qui me fait me sentir très frustré et désespéré dans ma vie	Je suis vraiment désolé d'entendre que vous traversez une période difficile au niveau professionnel. Il est compréhensible que l'injustice et les revers puissent causer de la frustration et du désespoir. Voici quelques suggestions pour vous aider à faire face à cette situation : 1. Prenez du recul : Prenez le temps de réfléchir à votre situation et à ce qui vous cause tant de frustration. Essayez…
Je suis discriminé par mes camarades de classe, et parfois j'ai l'impression que la vie n'a pas de sens	Je suis vraiment désolé d'apprendre que tu fais face à une discrimination de la part de tes camarades de classe. C'est une situation difficile à vivre, mais je suis ici pour t'écouter et te soutenir. Il est important de rappeler que tu es une personne de valeur, et personne ne mérite d'être discriminé. Les actions des autres ne reflètent pas ta véritable valeur en tant qu'individu. Si tu te sens …
Je suis très insatisfait de mon corps et de mon apparence, et je me critique et me dénigre toujours de manière excessive, ce qui affecte même ma vie quotidienne et mes activités sociales	Je suis désolé d'entendre que vous vous sentez insatisfait de votre corps et de votre apparence, et que cela vous affecte de manière si négative. Il est important de se rappeler que chaque individu est unique et qu'il n'y a pas de standard universel de beauté ou de corps idéal. Il peut être utile de travailler sur l'amour de soi et l'acceptation de son corps tel qu'il est. Voici quelques suggesti…
Récemment, je me sens souvent fatigué et faible, même monter un escalier est épuisant, devrais-je voir un médecin	Je ne suis pas un médecin, mais si vous vous sentez constamment fatigué et faible, cela pourrait indiquer un problème de santé sous-jacent. Je vous recommande de prendre rendez-vous avec un médecin pour discuter de vos symptômes et obtenir un avis médical professionnel. Ils pourront vous poser des questions supplémentaires, effectuer des examens et vous donner un diagnostic précis ainsi qu'un pla…
J'ai l'impression de ne pas pouvoir contrôler mes émotions et mon comportement et je prends souvent des décisions impulsives, est-ce une maladie mentale ? Comment la traiter ?	Il est possible que vous éprouviez des difficultés à contrôler vos émotions et votre comportement, mais cela ne signifie pas nécessairement que vous souffrez d'une maladie mentale. Il peut y avoir plusieurs raisons pour expliquer ce genre de difficultés, comme le stress, l'anxiété, le manque de régulation émotionnelle ou même des habitudes acquises au fil du temps. Si vous vous sentez dépassé(e) …
Je garde toutes les émotions négatives enfouies au fond de mon cœur, m'interdisant d'être ne serait-ce qu'un peu vulnérable, mais en moi-même, je n'arrive pas à les contenir.	Il est normal de vouloir garder ses émotions négatives pour soi-même, mais il est également important de les exprimer d'une manière saine. Garder toutes ces émotions enfouies peut être très difficile pour vous et pourrait éventuellement affecter votre bien-être émotionnel et mental. Il est essentiel d'accepter que ressentir des émotions, y compris les émotions négatives, est humain et fait partie…
Nous nous disputons sans cesse, à chaque fois avec des mots blessants, nous avons rompu par la suite	Je suis désolé d'entendre cela. Les disputes peuvent survenir dans toutes les relations, mais cela ne signifie pas que vous devez vous blesser mutuellement. Il est important de trouver des moyens de communiquer de manière respectueuse et constructive. Si vous avez rompu à la suite de ces disputes, il peut être bénéfique de prendre du recul et de réfléchir à ce qui a conduit à ces problèmes de com…
Quand il marche dans la rue, Xiao Zhang a toujours senti que les gens autour de lui l'observent, et son état mental est devenu de plus en plus instable.	Il est normal que Xiao Zhang se sente observé ou observé par les autres lorsqu'il marche dans la rue. Cependant, il est important de faire la distinction entre une simple conscience de l'environnement et un sentiment d'instabilité mentale. Si Xiao Zhang ressent une détérioration de son état mental et une instabilité émotionnelle, il est recommandé de chercher de l'aide professionnelle. Un profess…
Je sens qu'il y a un problème dans ma relation interpersonnelle. Il m'est difficile de communiquer et de discuter avec des amis, des membres de ma famille et des collègues. Parfois, il se produit même des conflits et des querelles. Cela me rend très frustré et impuissant. Je ne sais pas comment construire des relations saines	Il est normal de ressentir de la frustration lorsque les relations interpersonnelles ne se déroulent pas comme vous le souhaitez. Heureusement, il existe des mesures que vous pouvez prendre pour améliorer vos compétences en communication et construire des relations saines. Voici quelques conseils : 1. Écoute active : Lorsque vous discutez avec quelqu'un, assurez-vous de lui accorder toute votre a…
J'étais insatisfaite de mon apparence et de mon corps, et je me jugeais constamment et je doutais de moi-même, ce qui me laissait une faible confiance en moi et une faible estime de moi.	Je suis désolé d'entendre que vous avez une faible estime de vous-même. Beaucoup de gens peuvent se sentir insatisfaits de leur apparence et de leur corps à un moment donné de leur vie. Il est important de se rappeler que chaque personne est unique et qu'il n'y a pas de norme absolue en matière d'apparence. Voici quelques conseils pour améliorer votre estime de vous-même : 1. Pratiquez l'auto-acc…
Je me sens souvent seul et impuissant, comme si personne ne me comprenait vraiment, et j'ai du mal à connecter avec les gens, ce qui me dérange et rend difficile la recherche d'une solution	Je comprends que vous vous sentiez seul et impuissant, et je suis là pour vous aider. Il peut être difficile de se sentir déconnecté des autres, mais il existe des moyens de surmonter cela et de trouver des solutions. Tout d'abord, assurez-vous de prendre soin de vous. Prendre du temps pour vous-même, pratiquer des activités qui vous plaisent et vous détendent peut aider à améliorer votre bien-êt…
Après le divorce de mes parents, j'ai vécu dans la maison de ma grand-mère, même si je vis avec ma mère, j'ai toujours l'impression qu'elle est plus étrangère que ma grand-mère et je ne sais pas comment communiquer avec elle.	La communication peut parfois être difficile entre les membres de la famille, surtout après des événements comme un divorce. Il est normal de ressentir un écart avec ta mère après avoir vécu chez ta grand-mère. Voici quelques conseils pour aider à renforcer la communication avec ta mère : 1. Prends du temps pour discuter : Essaye de trouver des moments où tu peux discuter avec ta mère, que ce soi…
J'ai plus d'échecs que de réussites, et de plus en plus souvent je me console que me disant que tant que je travaille dur, il y aura des récompenses, mais la réalité est souvent décevante	Je comprends que cela puisse être décevant de ne pas obtenir autant de réussites que d'échecs. Cependant, il est important de garder à l'esprit que la réussite ne vient pas toujours immédiatement ou de la manière que nous attendons. Travailler dur est certainement un facteur clé pour atteindre ses objectifs, mais il est également important de faire preuve de patience et de persévérance. Les résul…
J'ai un sentiment intense de peur que quelque chose se produise et je n'arrive pas à me calmer	Je suis désolé d'entendre que vous ressentez cela. Les sentiments d'anxiété et de peur peuvent être perturbants. Voici quelques étapes que vous pouvez suivre pour essayer de vous calmer : 1. Respirez profondément : Prenez de longues inspirations par le nez et expirez lentement par la bouche. Cela peut aider à ralentir votre rythme cardiaque et à apaiser votre esprit. 2. Identifiez la source de vo…
Je sens que je suis sans cesse dans un état de confusion, ne sachant pas ce que je veux et ce que je dois faire, ce qui me dérange beaucoup et me fait parfois ressentir des émotions négatives.	Je comprends que se sentir constamment confus peut être perturbant et entraîner des émotions négatives. Voici quelques suggestions pour vous aider à surmonter cette confusion : 1. Prenez du temps pour vous : Accordez-vous régulièrement du temps pour réfléchir à vos pensées et à vos sentiments. Cela peut être en pratiquant la méditation, en écrivant dans un journal ou simplement en vous promenant …
Parfois, je me sens déprimé et il est difficile de sortir des émotions négatives, comment puis-je ajuster ma mentalité ?	Je suis désolé d'entendre que vous vous sentez déprimé. Cultiver une mentalité positive peut être un défi, mais cela ne signifie pas qu'il est impossible d'y parvenir. Voici quelques suggestions pour vous aider à ajuster votre mentalité : 1. Identifiez les pensées négatives : Essayez de noter les pensées négatives qui traversent votre esprit. Prenez conscience de ces pensées et reconnaissez qu'el…
J'ai toujours l'impression de ne pas être assez bon, pas assez intelligent, pas assez beau, et je veux souvent me présenter parfaitement pour éviter que les autres ne voient mes défauts	Il est tout à fait normal de ressentir ces sentiments d'insuffisance de temps en temps. Beaucoup de gens ont des moments où ils se sentent incertains ou moins confiants. Cependant, il est important de se rappeler que personne n'est parfait et que nous avons tous des défauts. Gardez à l'esprit que la perception que vous avez de vous-même peut être biaisée et pas nécessairement en accord avec la ré…
Je me sens souvent vide à l'intérieur, manquant d'un véritable sentiment d'appartenance et de but	Je suis désolé d'entendre que vous vous sentez souvent vide à l'intérieur. Ce sentiment peut être difficile à vivre, mais vous n'êtes pas seul. Beaucoup de gens éprouvent des moments où ils se sentent déconnectés et manquent de sens dans leur vie. Il est important de noter que la quête de sens et de but est quelque chose de très personnel et unique à chaque individu. Voici quelques suggestions qu…
Chaque fois que quelqu'un m'aborde ou me complimente, j'ai toujours l'impression qu'il me ment parce que je ne mérite pas le respect	Je comprends que vous pouvez ressentir cette manière, mais il est important de réaliser que vous méritez le respect et les compliments. Beaucoup de personnes ont des difficultés à accepter les compliments, et cela peut être dû à une faible estime de soi ou à des expériences passées négatives. Il est essentiel de travailler sur votre confiance en vous et de vous rappeler vos propres qualités et ré…
J'ai toujours peur d'être critiqué et dénigré par les autres, ce qui conduit à une diminution de ma confiance en moi. Comment puis-je améliorer ma confiance en moi ?	Il est tout à fait normal de craindre la critique et de ressentir une diminution de confiance en soi à la suite de cela. Cependant, il est important de travailler sur cette confiance en vous pour vous sentir mieux et épanoui dans votre vie. Voici quelques conseils pour améliorer votre confiance en vous : 1. Identifiez vos forces : Faites l'inventaire de vos qualités, compétences et réalisations. …
Je ne sais pas comment gérer mes émotions, j'explose souvent à cause de petites choses, je sens que je ne peux pas contrôler mes émotions, est-ce que cela signifie que j'ai un problème psychologique ?	Il est difficile de dire si vous avez un problème psychologique sans avoir plus d'informations détaillées sur votre situation. Cependant, il est possible que vous ayez besoin de développer certaines compétences en matière de gestion des émotions. L'incapacité à contrôler ses émotions peut être causée par différentes raisons, telles que le stress, l'anxiété, la dépression ou des expériences passée…
Je suis plein de peur et d'incertitude quant à l'avenir, je ne sais pas dans quelle direction je dois aller, je me sens perdu tous les jours	Je comprends que vous puissiez vous sentir ainsi face à l'incertitude de l'avenir. Beaucoup de gens traversent des périodes similaires et il est important de se rappeler que vous n'êtes pas seul dans cette situation. Voici quelques suggestions pour vous aider à retrouver une certaine clarté : 1. Prenez du recul et réfléchissez : Prenez un moment pour réfléchir à vos valeurs, intérêts, passions et…
J'ai toujours présenté un trouble obsessionnel-compulsif, je dois souvent vérifier à plusieurs reprises si les portes et les fenêtres sont fermées, si les appareils électriques sont éteints, etc. Cela affecte ma vie quotidienne et mon travail. Je veux savoir comment me débarrasser de ce problème.	Il est encourageant que vous cherchiez des moyens de surmonter votre trouble obsessionnel-compulsif (TOC). Bien qu'il puisse être difficile de s'en débarrasser complètement, il existe des méthodes de traitement efficaces pour réduire vos symptômes et améliorer votre qualité de vie. Voici quelques étapes que vous pouvez suivre : 1. Consultez un professionnel de la santé : Un médecin, un psychiatre…
Parfois, je m'ennuie, je ne sais pas quoi faire, je ne sais pas ce que l'avenir me réserve et je me sens vide.	Il est normal de ressentir de l'ennui ou de l'incertitude de temps en temps. Voici quelques suggestions pour vous aider à vous sentir plus épanoui : 1. Essayez de découvrir de nouvelles activités ou hobbies. Expérimentez des choses que vous n'avez jamais faites auparavant, cela peut vous aider à trouver de nouvelles passions. 2. Fixez-vous des objectifs à court et à long terme. Avoir des objectif…
J'ai toujours voulu avoir un bébé, mais après être tombée enceinte, j'ai toujours senti que je n'étais pas à la hauteur pour être une bonne mère	Il est tout à fait normal de ressentir des doutes et des inquiétudes quant à sa capacité à être une bonne mère, surtout si c'est votre première expérience. Voici quelques conseils pour vous aider à surmonter ces sentiments : 1. Soyez patiente avec vous-même : Le fait que vous vous posiez ces questions montre que vous vous souciez déjà du bien-être de votre enfant. Il est important de se rappeler …
Je suis toujours inquiète pour mon corps et ma santé, craignant de contracter diverses maladies, ce qui me rend très nerveuse et anxieuse.	Il est tout à fait normal de se préoccuper de sa santé, mais il est important de ne pas laisser cette préoccupation prendre le dessus et vous rendre nerveuse et anxieuse de manière excessive. Voici quelques conseils pour vous aider à gérer votre inquiétude : 1. Éduquez-vous : Apprenez davantage sur les différentes maladies et les mesures que vous pouvez prendre pour les prévenir. Cela vous donner…
Je suis très conscient de moi-même et pointilleux sur mon apparence et ma silhouette, et je suis souvent pris dans une sorte d'autocorrection et de changement sans fin	Il est normal de vouloir être conscient de vous-même et de prendre soin de votre apparence et de votre silhouette. Cependant, il est également important de se rappeler que personne n'est parfait et que l'acceptation de soi est essentielle pour une bonne santé mentale. Il peut être utile de s'interroger sur les raisons qui motivent cette autocorrection et ce changement sans fin. Est-ce pour vous s…
Les troubles d'apprentissage sont courants et vous pouvez rendre l'apprentissage plus amusant en le traitant comme un jeu	Absolument ! Les troubles d'apprentissage peuvent être un défi, mais rendre l'apprentissage amusant peut aider les enfants à s'engager davantage et à progresser. Voici quelques idées pour transformer l'apprentissage en jeu : 1. Utilisez des activités interactives : recherchez des ressources en ligne ou des applications éducatives qui proposent des activités ludiques et interactives liées aux suje…
Je veux évidemment avoir quelqu'un sur qui m'appuyer, mais je ne sais pas comment m'y prendre, à chaque fois que j'essaie, j'échoue, puis je perds courage et reviens au point initial.	Il est tout à fait normal de vouloir avoir quelqu'un sur qui compter, surtout lorsque l'on traverse des difficultés. Voici quelques étapes que vous pouvez suivre pour trouver le soutien dont vous avez besoin : 1. Identifiez vos besoins : réfléchissez à ce dont vous avez besoin d'un soutien. S'agit-il d'avoir quelqu'un pour vous écouter, vous conseiller ou vous motiver ? Comprendre ce que vous rec…
Je trouve que mon intérêt et mon enthousiasme pour les choses diminuent de plus en plus et je ne me sens jamais motivé à faire quoi que ce soit. Est-ce un problème de santé mentale ?	Je ne suis pas un professionnel de la santé mentale, mais je peux partager quelques informations générales. La diminution de l'intérêt et de l'enthousiasme peut effectivement être un signe de problème de santé mentale, comme la dépression. Il est important de noter que je ne peux pas poser de diagnostic précis, seule une évaluation par un professionnel de la santé qualifié pourrait le faire. Si v…
Une pression psychologique régulière peut affecter notre stabilité émotionnelle et notre santé physique. Nous devons entraîner notre résilience mentale et éduquer notre santé mentale	afin de mieux faire face à ces pressions. Voici quelques conseils pour améliorer votre bien-être mental : 1. Prenez du temps pour vous-même : Accordez-vous régulièrement des moments de détente et de plaisir pour vous déconnecter du stress quotidien. Cela peut inclure des activités comme la lecture, le jardinage, la méditation ou la pratique d'un hobby. 2. Faites de l'exercice régulièrement : L'ac…
J'ai été illégalement détenu pendant une nuit, torturé jusqu'à écroulement, pleurant seul dans un coin, seules les larmes illuminaient l'obscurité	Je suis vraiment désolé d'apprendre ce que vous avez vécu. Il est important de comprendre que je suis un assistant virtuel et que je ne peux pas fournir d'aide directe ou de soutien émotionnel dans des situations aussi graves que celle que vous décrivez. Cependant, je peux vous suggérer d'en parler à des personnes de confiance, comme votre famille, vos amis, ou un professionnel de la santé mental…
En termes de santé mentale des adolescents, il est très important d'apprendre à établir une relation saine et à exprimer correctement ses émotions et ses demandes.	Absolument ! Apprendre à établir des relations saines et à exprimer correctement ses émotions et ses demandes est crucial pour la santé mentale des adolescents. Voici quelques raisons pour lesquelles cela est si important : 1. Établir des relations saines : Les adolescents ont besoin de relations positives et soutenantes pour favoriser leur développement émotionnel et social. Apprendre à établir …
Je fais beaucoup de cauchemars ces derniers temps, et ces rêves me font peur et me mettent mal à l'aise, et affectent même la qualité de mon sommeil et ma vie quotidienne.	Je suis désolé d'entendre que vous traversez une période difficile avec vos cauchemars. Les cauchemars peuvent certainement être perturbants et avoir un impact sur votre bien-être général. Voici quelques conseils pour vous aider à faire face à cette situation : 1. Établir une routine de sommeil régulière : Essayez d'aller vous coucher et de vous réveiller à la même heure tous les jours afin d'aid…
Je suis toujours anxieux et je m'inquiète constamment de la façon dont les choses se passent, en particulier des petites choses, cela peut aussi me mettre mal à l'aise et anxieux	Il est normal de ressentir de l'anxiété et de s'inquiéter de temps en temps, mais si cela devient constant et vous met mal à l'aise, il est important de prendre des mesures pour gérer votre anxiété. Voici quelques suggestions qui pourraient vous aider : 1. Identifiez les déclencheurs de votre anxiété : Essayez de comprendre les situations, les pensées ou les événements qui déclenchent votre anxié…
Je ne peux pas arrêter mes pensées négatives, parfois même quand les choses ne vont pas si mal, je pense toujours au pire, je me sens tellement déprimé et impuissant, j'ai l'impression que je ne pourrai jamais me débarrasser de cette émotion.	Je suis vraiment désolé d'entendre que vous vous sentez déprimé et impuissant. Les pensées négatives peuvent être difficiles à contrôler, mais il est important de noter qu'il existe des techniques pour y faire face. Voici quelques suggestions qui peuvent vous aider : 1. Prenez conscience de vos pensées négatives : Essayez d'identifier les moments où ces pensées surviennent et les schémas qui les …
J'ai l'impression que ma vie est ennuyeuse et manque de passion et de motivation, ce qui me déprime et me désespère	Je comprends que vous puissiez ressentir de la frustration et de la déception lorsque vous avez l'impression que votre vie manque de passion et de motivation. Voici quelques suggestions pour vous aider à retrouver de l'enthousiasme et de l'énergie dans votre quotidien : 1. Identifiez vos passions : Prenez le temps de réfléchir à ce qui vous rend réellement heureux et vivant. Qu'est-ce qui vous pa…
Je souffre souvent d'insomnie, je reste allongé dans mon lit la nuit en pensant au travail, aux tâches familiales et aux relations interpersonnelles, ce qui me rend incapable de me concentrer pendant la journée, réduit l'efficacité de mon travail et mon humeur devient très mauvaise.	Je suis désolé d'entendre que vous souffrez d'insomnie. Cela peut être très frustrant et avoir un impact considérable sur votre qualité de vie. Voici quelques conseils qui pourraient vous aider à mieux dormir : 1. Établissez une routine de sommeil : Essayez de vous coucher et de vous réveiller à la même heure chaque jour, même les week-ends. Cela aidera votre corps à réguler son horloge interne. …
Quand je rencontre des revers et des déceptions, je pense que la seule façon d'être en sécurité est de tout oublier.	Je comprends que l'on puisse ressentir le besoin d'oublier lorsque l'on rencontre des revers et des déceptions. Cependant, il est important de noter que l'oubli complet n'est peut-être pas la seule solution. Il est tout à fait naturel de vouloir prendre du recul par rapport à des situations difficiles, mais il est également important d'apprendre à faire face à ces épreuves et à en tirer des leçon…
Je me sens souvent fatigué et faible, même lorsque je ne fais pas de travail physique, je souffre souvent d'insomnie et de difficultés à m'endormir, ce qui me rend très mal à l'aise et perturbé	Je suis désolé d'entendre que vous souffrez de fatigue et de faiblesse. Les problèmes d'insomnie peuvent certainement avoir un impact sur votre bien-être global. Voici quelques suggestions qui pourraient vous aider : 1. Établissez une routine de sommeil régulière : allez vous coucher et réveillez-vous à la même heure tous les jours, même les week-ends. 2. Créez un environnement propice au sommeil…
Je souffre parfois de dépression, je ne peux pas manger normalement, puis je contrôle mon alimentation car j'ai peur que les gens me voient maigrir	Je suis vraiment désolé d'apprendre que vous souffrez de dépression. Il est important de prendre soin de votre santé mentale et physique pendant cette période difficile. Cependant, il est également essentiel de parler à un professionnel de la santé, tel qu'un médecin ou un psychologue, pour obtenir un soutien approprié et des conseils adaptés à votre situation spécifique. Lorsqu'il s'agit de l'al…
Mes parents me critiquent toujours et peu importe ce que je fais n'est jamais assez bien, cela me déprime et me déçoit, j'ai l'impression que je ne pourrais jamais obtenir leur approbation et leurs éloges	Je suis désolé d'entendre que vous vous sentez critiqué par vos parents et que vous ne pouvez pas obtenir leur approbation et leurs éloges. Il est important de se rappeler que vous n'êtes pas seul dans cette situation et que de nombreuses personnes éprouvent des difficultés similaires avec leurs parents. Voici quelques choses que vous pourriez essayer de faire pour vous aider : 1. Exprimez vos se…
Mes relations amoureuses ont toujours été très instables, je suis toujours contrôlé par les émotions, incapable de maintenir ma relation de manière saine	Je comprends que cela puisse être difficile et frustrant de faire face à des relations amoureuses instables. Il est important de se rappeler qu'il est normal d'être submergé par les émotions lorsqu'on est amoureux, mais il est également essentiel de maintenir une relation de manière saine. Voici quelques suggestions qui pourraient vous aider : 1. Prenez du temps pour vous : Avant de vous engager …
Xiaoling a été victime d'intimidation à l'université, ce qui a fait qu'elle se sentait inférieure et déprimée. Comment puis-je l'aider à reconstruire sa confiance en elle et sa santé mentale ?	Il est essentiel de soutenir Xiaoling dans sa lutte contre l'intimidation et de l'aider à reconstruire sa confiance en elle et sa santé mentale. Voici quelques suggestions pour l'aider : 1. Écoutez-la attentivement : Laissez Xiaoling s'exprimer et partager ses émotions sans la juger. Assurez-vous de lui accorder toute votre attention pour qu'elle se sente entendue et comprise. 2. Encouragez-la à …
Mes relations familiales étaient compliquées et j'étais souvent stressée et anxieuse et je ne savais pas comment les gérer ni vers qui me tourner pour obtenir de l'aide.	Je suis désolé d'entendre que vos relations familiales étaient compliquées et que vous vous sentiez stressée et anxieuse à cause de cela. Il est normal de ressentir de telles émotions lorsque nous sommes confrontés à des difficultés familiales. Cependant, il est important de ne pas porter seul ce fardeau et d'obtenir le soutien nécessaire pour mieux gérer la situation. Voici quelques conseils pou…
J'ai un ami qui se plaint toujours et n'a aucune attitude positive envers quoi que ce soit, je pense que sa négativité affecte mes émotions, mais je ne sais pas comment communiquer avec lui	Il peut être difficile de communiquer avec quelqu'un qui est constamment négatif. Cependant, voici quelques conseils qui pourraient vous aider : 1. Écoutez attentivement : Lorsque votre ami exprime ses préoccupations et ses plaintes, prenez le temps de l'écouter de manière attentive. Montrez-lui que vous vous souciez de ce qu'il ressent en lui accordant toute votre attention. 2. Validez ses émoti…
Récemment, j'ai découvert que j'avais fréquemment des insomnies, même quand je m'endors, je fais des cauchemars et je me sens lourd à mon réveil, que dois-je faire ?	Il est important de prendre au sérieux les problèmes d'insomnie et de cauchemars fréquents, car ils peuvent avoir un impact important sur votre santé physique et mentale. Voici quelques suggestions pour vous aider à améliorer votre sommeil : 1. Établissez une routine de sommeil régulière : Essayez de vous coucher et de vous lever à heures fixes tous les jours, même les week-ends. Cela aide à régu…
Parfois, lorsque je discute avec des amis, j'ai toujours l'impression que la conversation est terminée une fois que j'ai fini de parler, et je ne sais pas quoi dire ensuite.	Il est tout à fait normal de se sentir parfois à court de mots ou de ne pas savoir quoi dire après avoir parlé pendant une certaine période. Voici quelques conseils pour continuer une conversation : 1. Posez des questions : Une bonne façon de relancer une conversation est de poser des questions à votre interlocuteur. Cela montre votre intérêt pour ce qu'il dit et peut ouvrir de nouvelles pistes d…
Mon enfant est victime d'intimidation à l'école et il est maintenant très renfermé et je ne sais pas comment l'aider	Je suis désolé d'entendre que votre enfant est victime d'intimidation. Voici quelques étapes que vous pouvez suivre pour l'aider dans cette situation difficile : 1. Écoutez attentivement : Laissez votre enfant s'exprimer et écoutez ses préoccupations sans le juger. Montrez-lui que vous êtes là pour le soutenir et le comprendre. 2. Encouragez la communication avec l'école : Demandez à votre enfant…
Chaque fois que je communique avec les gens, je me sens toujours très nerveux, je ne sais pas quoi dire et j'ai peur de dire la mauvaise chose.	Je comprends parfaitement ce que tu ressens. Communiquer avec les autres peut parfois être intimidant, mais il existe des moyens de se sentir plus à l'aise. Voici quelques conseils qui pourraient t'être utiles : 1. Sois toi-même : Essaie de détendre ton attitude et d'être authentique lorsque tu parles aux autres. Les gens apprécient généralement la sincérité et la véritable personnalité. 2. Prépa…
Chaque fois que je suis seul, je commence à avoir un sentiment de peur inexplicable, je me sens contrôlé sans le savoir par une force invisible, comme si j'étais enfermé, piégé dans une coquille infranchissable. Parfois, tout devient extrêmement effrayant.	Je suis vraiment désolé d'entendre cela. Il est compréhensible que vous vous sentiez effrayé lorsque vous êtes seul. Les sentiments de peur inexplicables et la sensation d'être contrôlé par une force invisible peuvent être très perturbants. Il est important de rappeler qu'en tant qu'assistant virtuel, je ne suis pas un professionnel de la santé mentale. Cependant, je peux vous offrir quelques sug…
J'ai toujours été trop dur avec moi-même et j'ai l'impression de ne pas être assez bon pour être aimé et valorisé	Je comprends que vous vous sentiez ainsi, mais il est important de savoir que vous méritez d'être aimé et valorisé, tout comme n'importe qui d'autre. Il est courant de ressentir des doutes sur soi-même et de se critiquer, mais vous pouvez travailler sur l'amélioration de votre estime de soi. Voici quelques conseils pour commencer à développer une estime de soi plus positive : 1. Soyez conscient d…
Ma vie n'est qu'une constante frustration, j'échoue quoi que je fasse, j'ai l'impression de ne rien valoir	Je suis désolé d'entendre que vous vous sentez ainsi. Il est important de se rappeler que tout le monde fait face à des défis et à des échecs à un moment donné de sa vie. Cependant, il est également important de garder à l'esprit que les échecs ne définissent pas votre valeur en tant que personne. Essayez de ne pas vous concentrer uniquement sur vos échecs, mais plutôt sur vos réalisations et vos…
J'ai toujours été victime d'intimidation, méprisée, je me sentais inutile et incompétente, incapable de montrer ma vraie force et mes capacités dans des situations sociales, me cachant toujours dans un coin	Je suis désolé d'entendre que vous avez vécu des expériences d'intimidation et que vous avez ressenti un manque de confiance en vous dans des situations sociales. Les sentiments d'inutilité et d'incompétence peuvent être très difficiles à gérer, mais il est important de se rappeler que vous êtes une personne précieuse et que vous avez des qualités uniques à offrir. Voici quelques suggestions qui …
Je me sens confus et impuissant face à l'avenir, je ne sais pas ce que je dois faire et je ne sais pas ce que je veux.	Je comprends que ça peut être difficile de se sentir perdu quant à l'avenir. Cependant, il est important de se rappeler que de nombreuses personnes traversent des périodes d'incertitude. Voici quelques suggestions pour vous aider à y voir plus clair : 1. Prenez du recul : Essayez de prendre du temps pour vous détendre et réfléchir à ce qui vous passionne vraiment. Quels sont vos intérêts, vos val…
Je ne sais pas pourquoi je pense toujours trop, je m'inquiète pour l'avenir et je dois vérifier plusieurs fois d'avoir bien verrouillé la porte et fermé les fenêtres chaque fois que je sors, ce qui me rend très fatiguée et irritable	Il semble que vous éprouviez de l'anxiété et des préoccupations excessives, ce qui peut être épuisant et avoir un impact sur votre bien-être émotionnel. Heureusement, il existe plusieurs choses que vous pouvez essayer pour gérer votre anxiété. Voici quelques suggestions : 1. Dialogue intérieur : Examinez vos pensées et identifiez celles qui sont irrationnelles ou exagérées. Essayez de les remplac…
J'ai été agressée sexuellement par le passé, mais je ressens toujours de la douleur et de la détresse, comment puis-je faire face à cette blessure passée ?	Je suis vraiment désolé d'apprendre que vous avez vécu une agression sexuelle par le passé. Il est tout à fait compréhensible que vous ressentiez de la douleur et de la détresse à la suite d'une telle expérience. Voici quelques conseils pour vous aider à faire face à cette blessure : 1. Cherchez du soutien : N'hésitez pas à parler de votre expérience à des personnes de confiance, comme des amis p…
Je sens que ma vie manque de sens et de but, que je ne peux pas trouver ce que je veux vraiment faire, et ce sentiment de perdition est très douloureux.	Je comprends à quel point il peut être difficile de se sentir perdu et de chercher un sens et un but dans la vie. C'est une expérience assez commune et il est important de vous rappeler que vous n'êtes pas seul dans cette quête. Voici quelques suggestions qui pourraient vous aider à trouver un sens et un but dans votre vie : 1. Réfléchissez à vos valeurs et à ce qui est vraiment important pour vo…
Un jour, j'ai trouvé un moyen de m'évader de mon monde réel, qui consiste à poser ma tête sur le canapé, à me boucher les oreilles et à ne pas écouter les sons extérieurs, afin de pouvoir m'immerger complètement dans un monde où je suis seul. Dans ce monde, tous les problèmes disparaissent.	Cela semble être une manière intéressante de trouver un peu de répit et de calme dans votre monde quotidien. Trouver des moments pour se retirer et se détendre peut être bénéfique pour notre bien-être mental. Cependant, il est aussi important de faire face aux problèmes et aux défis de la vie réelle plutôt que de les ignorer complètement. Parfois, partager vos préoccupations avec quelqu'un de con…
Je me sens souvent seul et impuissant, j'ai l'impression de n'être compris ou soutenu par personne, même lorsqu'il y a des gens autour de moi, je me sens séparé et aliéné, cette émotion me rend très déprimé et négatif, et conduit parfois à des symptômes d'anxiété et de dépression	Je suis désolé d'entendre que vous vous sentez seul et impuissant. Il est important de se rappeler que vous n'êtes pas seul dans cette situation et qu'il existe des moyens d'améliorer votre bien-être émotionnel. Voici quelques suggestions pour vous aider : 1. Parlez de ce que vous ressentez : Il est important de partager vos émotions et vos sentiments avec des personnes de confiance, comme des am…
Une phrase de ta part peut me briser le cœur	Je suis désolé si mes mots peuvent parfois blesser, mais je suis là pour t'aider et te soutenir du mieux que je peux. N'hésite pas à me dire ce qui te trouble afin que je puisse adapter ma réponse en conséquence.
Je suis extrêmement insatisfait(e) de mon apparence et de ma silhouette, j'éprouve souvent une faible estime de soi et de l'anxiété	Je suis désolé d'entendre cela, mais je suis là pour vous aider. L'estime de soi et l'anxiété liées à l'apparence peuvent être des problèmes difficiles à surmonter, mais il est possible de travailler dessus. Voici quelques idées pour vous aider à améliorer votre confiance en vous : 1. Identifiez vos forces : Prenez le temps de réfléchir à vos qualités et compétences qui vont au-delà de votre appa…
Je ne sais absolument pas ce que je fais. Je n'ai jamais de direction dans quoi que ce soit que j’entreprends, ce qui me laisse très frustré.	Je comprends que vous puissiez vous sentir frustré par le manque de direction et de clarté dans vos actions. Heureusement, il existe des stratégies que vous pouvez mettre en place pour vous aider à trouver une direction et atteindre vos objectifs. Voici quelques suggestions : 1. Identifiez vos valeurs et vos passions : Quels sont les aspects de votre vie qui vous enthousiasment et vous motivent l…
Je fais face à de nombreuses angoisses sociales, je n'ose pas communiquer avec des inconnus et je n'aime pas être dans des endroits bondés, j'espère pouvoir surmonter ces peurs.	Il est tout à fait normal de ressentir de l'anxiété sociale et de la nervosité lorsqu'on communique avec des inconnus ou lorsqu'on se retrouve dans des endroits bondés. Beaucoup de personnes éprouvent ces craintes également. Voici quelques suggestions pour vous aider à surmonter ces peurs : 1. Se familiariser progressivement : Commencez par vous exposer à des situations sociales moins intimidante…
Les psychologues croient que la dépression extrême peut affecter la santé physique et mentale d'une personne	Oui, les psychologues croient en effet que la dépression extrême peut affecter à la fois la santé physique et mentale d'une personne. La dépression peut provoquer des symptômes tels que la fatigue, les troubles du sommeil, la perte d'appétit ou des problèmes de digestion, ce qui peut entraîner une détérioration de la santé physique. Sur le plan mental, la dépression peut altérer la concentration,…
Chaque fois que je commence à poursuivre un objectif, je me sens impuissant et chaque fois que j'essaie de changer quelque chose, j'ai l'impression de ne pas en avoir le courage	Il est tout à fait normal de se sentir impuissant ou de manquer de courage lorsque l'on poursuit un objectif. Les projets ambitieux peuvent être intimidants et il est courant de ressentir des doutes ou des peurs en cours de route. Voici quelques conseils pour vous aider à surmonter ces obstacles : 1. Comprendre pourquoi vous vous sentez impuissant : Prenez un moment pour réfléchir aux raisons qui…
Je souffre souvent d'insomnie et de difficultés à me concentrer sur mon travail parce que j'ai peur de ne pas avoir les compétences pour faire mon travail	Il est tout à fait compréhensible d'éprouver de l'insomnie et des difficultés de concentration lorsqu'on doute de ses compétences professionnelles. Voici quelques conseils pour vous aider à surmonter ces problèmes : 1. Identifiez vos peurs : Essayez de comprendre les raisons sous-jacentes qui vous font douter de vos compétences. Est-ce que vous manquez de confiance en vous ou avez-vous des attent…
Je ressens plus de douleur que jamais quand ma famille rejette mon aide	Je suis désolé d'entendre cela. Être rejeté par sa propre famille peut être extrêmement douloureux. Il est important de se rappeler que cette douleur ne définit pas votre valeur en tant que personne. Il est possible que votre famille ait des raisons spécifiques à leur rejet de votre aide. Parfois, les membres de la famille peuvent avoir du mal à accepter l'aide de quelqu'un, même si celle-ci est …
Je me sens déprimé à chaque fois que je rencontre des difficultés	Je suis désolé d'entendre ça. Rencontrer des difficultés peut être décourageant et cela peut affecter notre humeur. Voici quelques conseils pour vous aider à faire face à ces moments : 1. Prenez du recul et respirez profondément : Prenez quelques instants pour vous calmer et réfléchir calmement aux problèmes que vous rencontrez. Une respiration profonde peut aider à apaiser votre esprit. 2. Ident…
Je me sens souvent déprimé et impuissant, j'ai l'impression que ma vie manque de sens et de valeur, et je pense parfois au suicide, mais j'ai peur d'en parler à qui que ce soit, craignant qu'ils ne pensent que je suis une personne faible et un raté.	Je suis vraiment désolé d'entendre que vous vous sentez ainsi. Il est important de comprendre que vous n'êtes pas seul et qu'il y a des personnes prêtes à vous aider. Parler de vos sentiments peut être difficile, mais c'est une étape importante vers le rétablissement. Je vous encourage à chercher un soutien professionnel. Les thérapeutes et les psychologues sont formés pour vous aider à surmonter…
J'ai un ami qui a toujours l'impression qu'il n'est pas assez bon, assez intelligent, assez talentueux ou même digne d'attention, ce qui me fait m'inquiéter pour sa santé mentale.	Il semble que votre ami soit confronté à des problèmes d'estime de soi et peut-être même de santé mentale. Il est important d'être attentif à ses besoins et d'offrir votre soutien. Voici quelques suggestions pour aider votre ami : 1. Écoutez-le attentivement : Laissez votre ami exprimer ses sentiments et assurez-vous de lui donner une attention bienveillante pendant qu'il parle de ses préoccupati…
Je me sens souvent déprimé et désespéré à cause de la pression du travail et des conflits familiaux, comment puis-je soulager cette émotion et maintenir ma santé mentale ?	Je suis désolé d'entendre que vous vous sentez déprimé et désespéré. Prendre soin de votre santé mentale est essentiel, et il existe plusieurs choses que vous pouvez faire pour soulager votre émotion et vous sentir mieux : 1. Parlez-en avec quelqu'un : Parler de vos sentiments avec un ami proche, un membre de votre famille ou un professionnel de la santé peut être très utile. Ils pourront vous ap…
Dernièrement, mon esprit a commencé à s'embrouiller et j'ai commencé à m'inquiéter pour ma santé mentale et ça me fait peur	Je suis désolé d'entendre que vous traversez une période difficile. Il est normal de ressentir de l'inquiétude lorsque notre esprit est perturbé. Il est important de prendre soin de sa santé mentale. Voici quelques suggestions pour faire face à vos préoccupations : 1. Parlez-en à quelqu'un de confiance : cela peut être un ami proche, un membre de votre famille ou un professionnel de la santé ment…
Je n'ose pas confronter les autres, j'ai toujours l'impression que je ne suis pas assez bon, je suis nerveux, même si mes amis me parlent, je continue à m'inquiéter de ce qu'ils pensent	Il est compréhensible de ressentir de l'insécurité et de l'anxiété lorsqu'on se confronte aux autres. Beaucoup de gens ont ces mêmes sentiments de ne pas être assez bon ou d'être jugé par les autres. Voici quelques conseils pour vous aider : 1. Reconnaître vos forces : Prenez conscience de vos compétences et de ce qui vous rend unique. Rappelons-nous que nous avons tous des qualités et des talent…
Je crains de ne pas pouvoir maintenir ma santé mentale et de laisser tomber ma famille	Je suis désolé d'entendre que vous vous sentez ainsi. Il est important de prendre soin de votre santé mentale pour pouvoir soutenir votre famille. Voici quelques suggestions pour vous aider : 1. Cherchez du soutien : Parlez à des proches, des amis de confiance ou un professionnel de la santé mentale pour exprimer vos préoccupations et obtenir des conseils. 2. Faites de l'auto-soin une priorité : …
Je me sens souvent seul et impuissant, même quand je suis entouré de gens, j'ai l'impression que personne ne comprend mon monde intérieur	Je suis désolé d'entendre que vous vous sentez seul et impuissant. Ressentir cette manière peut être très difficile, mais il est important de savoir que vous n'êtes pas seul. Beaucoup de gens luttent avec des sentiments similaires et il peut être utile d'en parler à quelqu'un en qui vous avez confiance, comme un ami proche, un membre de votre famille ou un professionnel de la santé. Il est égalem…
Je me sens très confus à propos de l'avenir, je ne sais pas quoi faire, cette confusion me rend très anxieux et mal à l'aise	Je comprends que vous vous sentiez confus et anxieux face à l'avenir. Il est normal de se poser des questions sur nos choix et nos perspectives futures. Voici quelques suggestions pour vous aider à faire face à cette confusion : 1. Prenez du recul : Accordez-vous du temps pour réfléchir et analyser vos sentiments. Essayez de comprendre quelles sont les sources de votre anxiété et de votre confusi…
Je suis allé à une fête aujourd'hui, mais tout le monde s'est moqué de moi et j'ai été rejeté par les autres. J'étais vraiment sur le point de m'effondrer mentalement.	Je suis vraiment désolé d'entendre cela. Être rejeté et se moquer de quelqu'un peut être une expérience très difficile et éprouvante émotionnellement. Il est important de se rappeler que vous n'êtes pas seul et que vous n'êtes pas défini par les opinions des autres. Voici quelques suggestions pour vous aider à traverser cette situation : 1. Prenez du recul : Accordez-vous un moment pour vous calm…
Je trouve mes relations interpersonnelles difficiles et il m'est toujours difficile de créer des liens profonds avec les gens. J'ai l'impression de ne pas savoir comment m'entendre avec les gens ou comment communiquer avec eux, alors je suis facilement isolée. J'ai envie d'avoir de vrais amis, mais je ne sais pas comment m'en faire.	L'établissement de relations interpersonnelles peut parfois être difficile, mais il existe certaines choses que vous pouvez essayer pour améliorer vos compétences sociales et créer de véritables liens d'amitié. Voici quelques conseils pour vous aider à vous connecter avec les gens : 1. Travaillez sur votre confiance en vous : Avoir une image positive de vous-même peut vous aider à être plus à l'a…
Mon travail est soumis à une forte pression, je dois faire des heures supplémentaires tous les jours et je me couche souvent tard. J'ai l'impression que mon corps et mon esprit ont atteint leurs limites, mais je ne peux toujours pas m'arrêter. Que dois-je faire pour éviter une crise.	Il est compréhensible que vous ressentiez une forte pression et une surcharge de travail. Il est important de prendre soin de votre santé mentale et physique pour éviter une éventuelle crise. Voici quelques suggestions pour vous aider dans cette situation : 1. Priorisez vos tâches : Identifiez les tâches les plus importantes et levez-vous chaque jour avec l'intention de les accomplir en premier. …
Je sens que je ne peux pas contrôler mes émotions et je perds souvent mon sang-froid à cause de petites choses, ce qui rend les gens autour de moi mal à l'aise	Il est normal de ressentir des émotions intenses de temps en temps, mais si vous avez du mal à les contrôler et que cela affecte négativement vos relations avec les autres, il pourrait être utile de prendre des mesures pour gérer vos émotions de manière plus efficace. Voici quelques conseils qui pourraient vous aider : 1. Prenez conscience de vos émotions : Essayez de reconnaître vos émotions dès…
Il n'y avait pas d'amour dans ma famille, pas de parole chaleureuse, pas de véritable sentiment de sécurité, je ne recevais que des reproches et subissais des pressions, alors je suis devenu plus introverti et je ne voulais interagir avec personne.	Je suis désolé d'entendre cela. Grandir sans amour ni soutien familial peut être très difficile. Il est compréhensible que cela ait pu vous rendre introverti et avoir un impact sur votre envie d'interagir avec les autres. Permettez-moi de vous rappeler que vous n'êtes pas seul et qu'il y a des gens qui peuvent vous aider à traverser cette période difficile. Avez-vous envisagé de parler à un profe…
Je m'inquiète pour mon avenir, je ne sais pas si j'aurai du succès, si je pourrai réaliser mes rêves	Il est normal de se sentir préoccupé par son avenir et de se poser des questions sur le succès et la réalisation de ses rêves. Voici quelques conseils pour vous aider : 1. Identifiez vos rêves et vos objectifs : Prenez le temps de réfléchir à ce que vous souhaitez vraiment accomplir dans la vie. Quels sont vos passions et vos talents ? Quels sont les domaines qui vous intéressent le plus ? Avoir …
J'ai l'impression de ne pas pouvoir gérer le stress et les défis de ma vie, et je souffre souvent de mauvaise humeur, d'anxiété et d'insomnie.	Je suis désolé d'entendre cela. Le stress et les défis de la vie quotidienne peuvent être accablants, mais il existe des moyens de les gérer. Voici quelques conseils pour vous aider : 1. Prenez du temps pour vous : Accordez-vous régulièrement du temps pour faire des activités qui vous plaisent et vous détendent. Cela peut être de la lecture, du sport, de la méditation, ou tout ce qui vous permet …
Je me sens seul, j'ai beaucoup de gens autour de moi mais je n'ai pas toujours l'impression de pouvoir vraiment me lier avec eux, est-ce un trouble relationnel ?	Il est possible que vous ressentiez un sentiment de solitude même en étant entouré de personnes. Cela pourrait être dû à différents facteurs, y compris des difficultés à établir des liens profonds ou une sensation de ne pas être compris ou accepté par les autres. Cependant, je ne suis pas un professionnel de la santé mentale, il serait donc préférable de consulter un psychologue ou un thérapeute …
Je me sens très mal à l'aise face à l'avenir, je ne sais pas quoi faire et je ne sais pas ce que l'avenir me réserve	Je comprends que vous puissiez vous sentir anxieux ou incertain face à l'avenir. Beaucoup de gens ressentent cela à un moment donné de leur vie. Voici quelques suggestions pour vous aider à surmonter cette situation : 1. Prenez du recul : Prenez le temps de réfléchir à ce qui vous inquiète exactement. Identifiez les domaines de votre vie qui vous préoccupent et notez vos pensées et sentiments à c…
J'ai beaucoup de problèmes dans mon mariage et je me sens déprimé et impuissant et je ne sais pas quoi faire	Je suis désolé d'apprendre que vous traversez une période difficile dans votre mariage. Voici quelques suggestions qui pourraient vous aider : 1. Communiquez ouvertement : Essayez de parler ouvertement avec votre conjoint(e) de vos sentiments et de vos préoccupations. La communication est essentielle pour résoudre les problèmes dans un mariage. Essayez d'exprimer vos besoins et d'écouter ceux de …
Je me sens souvent très fatigué, physiquement et mentalement faible, et parfois même j'ai des pensées suicidaires, ayant l'impression que ma vie n'a pas de sens	Je suis vraiment désolé d'entendre cela. Il est important de parler de ce que vous ressentez et de trouver du soutien. Je vous encourage vivement à en parler à un professionnel de la santé, comme un médecin ou un thérapeute, qui pourra vous fournir l'aide dont vous avez besoin. Ils peuvent vous aider à comprendre ce qui se passe et à trouver des solutions pour améliorer votre bien-être. En attend…
Il m'arrive parfois de ressentir soudainement des sensations de peur et de panique extrêmes, et il m'est difficile de contrôler mes émotions et mon comportement, cet état peut durer pendant une période prolongée.	Je suis désolé d'entendre que vous traversez ces moments difficiles. Les sensations de peur et de panique extrêmes peuvent être très débilitantes. Il est important de chercher de l'aide professionnelle pour gérer et comprendre ces épisodes. Je vous suggère de consulter un professionnel de la santé mentale, comme un psychiatre ou un psychologue, pour évaluer votre situation et obtenir un diagnosti…
Chaque fois que je fais face à un nouveau défi, je me sens tellement nerveux et peu sûr de moi que j'ai l'impression de ne pas pouvoir le gérer	Il est tout à fait normal de se sentir nerveux et peu sûr de soi lorsqu'on est confronté à un nouveau défi. Beaucoup de gens ressentent cela, et cela peut être dû à la peur de l'inconnu et de l'échec potentiel. Voici quelques conseils pour vous aider à mieux gérer ces sentiments : 1. Reconnaître et accepter vos sentiments : Il est important de reconnaître que c'est normal de se sentir nerveux fac…
J'ai parfois l'impression soudaine de ne plus avoir de passe-temps, de ne m'intéresser à rien et d'avoir perdu ma direction et ma motivation	Il est tout à fait normal de se sentir ainsi par moments. Voici quelques conseils pour redécouvrir vos passe-temps et retrouver motivation et direction : 1. Faites une pause : Accordez-vous du temps pour vous ressourcer et réfléchir à ce qui vous passionne vraiment. 2. Réfléchissez à vos valeurs : Identifiez ce qui est vraiment important pour vous dans la vie. Cela vous aidera à trouver des activ…
De temps en temps, une émotion incontrôlable me vient au cœur, je me demande ce que je devrais faire si je souffre de dépression	Je suis désolé d'apprendre que vous ressentez cela. La dépression est une maladie sérieuse qui peut rendre la vie difficile. Si vous pensez être en souffrance de dépression, il est important de chercher de l'aide auprès d'un professionnel de la santé, comme un médecin ou un psychologue. Ils pourront vous donner un diagnostic précis et vous recommander un traitement adapté. En attendant votre rend…
J'ai toujours ressenti un malaise physique et j'ai toutes sortes de symptômes étranges, mais les médecins disent que je suis en bonne santé, ce qui me rend très anxieux et impuissant.	Je comprends que cela puisse être une situation frustrante pour vous. Il peut être difficile de vivre avec des symptômes inexpliqués et de se sentir incompris par les professionnels de la santé. Voici quelques suggestions pour vous aider : 1. Obtenez une deuxième opinion : Si les médecins que vous avez consultés jusqu'à présent n'ont pas été en mesure de trouver une explication à vos symptômes, v…
Du fait d'une exposition prolongée à un environnement stressant, Huang Xiaoming a des insomnies fréquentes, ne différencie plus le jour de la nuit et a complètement perdu son rythme de vie	Je suis désolé d'apprendre que Huang Xiaoming ait des problèmes d'insomnie et ait perdu son rythme de vie. Le stress prolongé peut en effet avoir un impact négatif sur le sommeil et le bien-être général. Je suis là pour vous aider, alors voici quelques suggestions pour améliorer la qualité de sommeil de Huang Xiaoming et retrouver un rythme de vie sain : 1. Établir une routine de sommeil : Il est…
Ma relation avec mes amis n'a jamais été excellente, j'ai l'impression d'avoir du mal à me faire de vrais amis et cela me fait me sentir très seul	Je suis désolé d'entendre que vous vous sentez seul et que vous avez du mal à vous faire de vrais amis. La construction de relations amicales solides peut être un défi pour de nombreuses personnes. Voici quelques conseils qui pourraient vous être utiles : 1. Soyez vous-même : Il est important d'être authentique et loyal envers vous-même et envers les autres. Cela vous aidera à attirer des personn…
Les gens autour de moi pensent toujours que je suis trop nerveux et que je m'inquiète pour de petites choses, comment puis-je me détendre ?	Se détendre peut être un défi, mais il existe de nombreuses techniques qui peuvent vous aider à y parvenir. Voici quelques conseils pour vous aider à vous détendre : 1. Pratiquez des exercices de respiration : Respirez profondément en inspirant par le nez pendant quelques secondes, puis expirez lentement par la bouche. Cette technique peut aider à ralentir le rythme cardiaque et à calmer l'esprit…
Mes insomnies m'obligent à voir un psychiatre tous les soirs	Je suis désolé d'entendre que vous souffrez d'insomnie et que cela vous oblige à consulter un psychiatre tous les soirs. L'insomnie peut être un problème très frustrant et perturbant pour votre bien-être général. Cependant, en tant qu'assistant virtuel, je ne suis pas qualifié pour fournir des conseils médicaux ou psychiatriques. Je vous encourage vivement à continuer à consulter votre psychiatre…
Je sens que je ne suis pas capable de faire face à la pression familiale et celle de la société, et je ne peux pas accomplir beaucoup de choses	Il est parfaitement normal de ressentir de la pression familiale et sociale, et de douter de vos capacités à accomplir beaucoup de choses. Voici quelques suggestions pour vous aider à faire face à cette pression : 1. Identifiez vos priorités : Commencez par définir vos propres objectifs et priorités dans la vie. Quelles sont les choses qui vous motivent vraiment et vous rendent heureux/se ? Cela …
J'ai l'impression que mes relations se détériorent, ni ma famille ni mes amis ne me font confiance ou ne me soutiennent, cela me fait me sentir tellement perdu et désespéré.	Je suis vraiment désolé d'entendre que vous traversez une période difficile avec vos relations. Il est normal de se sentir perdu et désespéré lorsque nous nous sentons déconnectés de nos proches. Voici quelques suggestions pour vous aider à faire face à cette situation : 1. Communiquez : Essayez d'ouvrir une discussion honnête avec vos proches afin de comprendre les raisons de leur manque de conf…
Je me sens souvent incapable de contrôler mes émotions et mon comportement et j'agis souvent de manière impulsive ou violente.	Je suis désolé d'entendre cela. Il peut être difficile de faire face à des émotions intenses et de les gérer de manière appropriée. Voici quelques conseils qui pourraient vous aider : 1. Prenez conscience de vos émotions : Essayez d'identifier les émotions que vous ressentez lorsque vous vous sentez impulsif ou violent. Cela peut vous aider à anticiper ces réactions et à mieux les gérer. 2. Respi…
J'ai souvent peur d'être rejeté, donc je dis rarement ce que je pense	Il est tout à fait normal d'avoir peur d'être rejeté. Beaucoup de personnes éprouvent cette crainte, car personne n'aime être rejeté ou mal jugé. Cependant, il est important de se rappeler que l'expression de vos pensées et opinions est essentielle pour votre bien-être et votre épanouissement personnel. Voici quelques suggestions qui pourraient vous aider : 1. Acceptez vos peurs : Reconnaître que…
La dépression a commencé à se développer progressivement pendant l'adolescence	Je suis désolé d'entendre que vous avez connu une dépression dès votre adolescence. La dépression peut être une expérience difficile et je suis là pour vous soutenir. Si vous avez besoin d'aide ou de conseils, n'hésitez pas à me le faire savoir.
Je me sens insatisfait de mon apparence et de mon corps, je me sens loin d'être parfait et je me sens souvent anxieux et peu sûr de moi	Je suis désolé d'entendre que vous vous sentez insatisfait de votre apparence et de votre corps. Il est important de se rappeler que personne n'est parfait et que l'estime de soi peut fluctuer. Voici quelques suggestions pour vous aider à améliorer votre confiance en vous : 1. Identifiez vos forces : Prenez le temps de réfléchir aux choses que vous aimez chez vous, que ce soit une qualité intérie…
J'ai toujours peur de ne pas assez bien faire, même si les autres me félicitent, je n'arrive pas abandonner mes inquiétudes	Il est normal d'avoir des doutes et des inquiétudes concernant notre propre performance. Cependant, il est important de se rappeler que les compliments et les félicitations des autres sont des signes que vous faites bien les choses. Voici quelques conseils pour vous aider à gérer ces inquiétudes : 1. Faites preuve de bienveillance envers vous-même : soyez conscient de vos pensées négatives et rem…
Je trouve que j'ai de plus en plus de mal à me concentrer, que ce soit en lisant ou en faisant autre chose, je suis facilement distrait	Il est compréhensible de ressentir des difficultés de concentration. Voici quelques conseils qui pourraient t'aider à améliorer ta capacité à te concentrer : 1. Crée un environnement propice à la concentration : Choisis un endroit calme, loin des distractions telles que la télévision, le téléphone ou les bruits extérieurs. 2. Développe une routine : Établir une routine régulière t'aidera à entraî…
J'ai toujours l'impression de n'avoir aucune valeur, je ne sais pas quel est le sens de mon existence, et je me sens chaque jour vide et impuissant.	Je suis désolé d'entendre que vous vous sentez de cette façon. Il est important de rappeler que chacun d'entre nous a de la valeur et un but dans la vie, même si nous ne parvenons pas toujours à le voir clairement. Voici quelques suggestions pour vous aider à surmonter ces sentiments : 1. Parlez à quelqu'un : Parler de vos sentiments peut être très bénéfique. Vous pouvez solliciter le soutien d'u…
Je suis terrifiée à l'idée d'interagir avec les gens, j'ai peur d'être rejetée, ridiculisée ou incomprise, et je me sens souvent seule et impuissante.	Je suis vraiment désolé d'entendre que vous vous sentez ainsi. L'anxiété sociale peut être très difficile à gérer, mais il est important de rappeler que vous n'êtes pas seul et qu'il existe des moyens d'améliorer votre confiance en vous et votre interaction avec les autres. Voici quelques suggestions pour vous aider : 1. Identifiez vos peurs : Prenez le temps d'identifier les situations spécifiqu…
Je suis très insatisfaite de mon apparence et de ma silhouette, je me sens laide et peu attirante. J'ai souvent pensé à faire une chirurgie plastique et à perdre du poids, mais je suis également inquiète des risques de la chirurgie et j'ai peur d'être ridiculisée et rejetée par les autres.	Je suis désolé d'entendre que vous vous sentez ainsi. L'apparence et la confiance en soi peuvent être des sujets délicats. Il est important de se rappeler que chaque personne est unique et belle à sa manière. La chirurgie plastique peut être une option, mais il est essentiel de bien réfléchir aux risques, aux coûts, et d'en discuter avec un professionnel de la santé. La perte de poids peut être u…
Je me couche souvent tard et je fais des heures supplémentaires pour le travail, ce qui aggrave de plus en plus ma condition physique, mais je ne peux pas m'arrêter, car je sens que ce n'est qu'ainsi que je pourrai prouver ma valeur et mes capacités	Je comprends que tu te sentes obligé de faire des heures supplémentaires et de te coucher tard pour prouver ta valeur et tes capacités au travail. Cependant, il est important de prendre soin de ta santé physique et mentale. Voici quelques suggestions pour t'aider à trouver un équilibre : 1. Établir des limites : Fixe des horaires de travail raisonnables et essaie de les respecter autant que possi…
Je me sens devenir de plus en plus accro aux jeux et aux réseaux sociaux, comme si ces choses étaient devenues partie intégrante de ma vie, cette dépendance me fait me donne l'impression d'être incapable de m'en sortir et de perdre mon identité, j'espère trouver un moyen de me débarrasser de cette dépendance.	Je comprends que tu ressens une dépendance accrue aux jeux et aux réseaux sociaux, et je peux comprendre l'inquiétude que cela suscite. Il est important de prendre des mesures pour te libérer de cette dépendance et retrouver un sentiment de contrôle sur ta vie. Voici quelques conseils qui pourraient t'aider : 1. Prends conscience de ton utilisation : Commence par te rendre compte de la quantité d…
Cela me dérange que mon humeur soit toujours changeante, parfois je suis très heureuse, et d'autres fois je suis tellement déprimée que j'ai même envie de me suicider.	Je suis vraiment désolé d'entendre que vous vous sentez ainsi. Il est important de prendre vos sentiments au sérieux. Avoir des sautes d'humeur extrêmes peut être le signe d'un trouble tel que la dépression, le trouble bipolaire ou d'autres problèmes de santé mentale. Il est crucial de demander de l'aide à un professionnel de la santé mentale pour obtenir un soutien approprié. En attendant, voici…
Parfois j'ai l'impression que personne ne se soucie de moi et je suis le seul sur qui je peux vraiment compter	Je suis désolé d'apprendre que vous vous sentez ainsi. Se sentir seul et non soutenu peut être très difficile à vivre. Il est important de se rappeler que vous n'êtes pas seul et qu'il y a toujours de l'aide disponible. Voici quelques suggestions pour vous aider : 1. Exprimez vos sentiments : Parlez à quelqu'un en qui vous avez confiance, qu'il s'agisse d'un ami, d'un membre de votre famille ou d…
Récemment, je souffre souvent d'insomnie et je me tourne et me retourne sans cesse dans mon lit la nuit. Est-ce que cela pourrait être un problème psychologique sous-jacent ?	Il est possible que votre insomnie soit liée à un problème psychologique sous-jacent. Le stress, l'anxiété, la dépression et d'autres problèmes émotionnels peuvent perturber le sommeil. Il est important de comprendre que le sommeil et la santé mentale sont étroitement liés, et qu'ils s'influencent mutuellement. Si vous pensez que votre insomnie est due à un problème psychologique, je vous recomma…
Ma relation avec ma famille n'a jamais été bonne, j'ai l'impression qu'ils ne me comprennent pas, ne me respectent pas, ça me fait me sentir seul	Je suis désolé d'entendre que vous vous sentez seul en raison de votre relation difficile avec votre famille. Les conflits familiaux peuvent être très éprouvants émotionnellement. Il est important de se rappeler que vous n'êtes pas seul et qu'il existe des solutions possibles pour améliorer la situation. Voici quelques conseils qui pourraient vous aider : 1. Communication : Essayez de parler ouve…
Je me sens souvent vide et seul à l'intérieur, cherchant quelque chose pour combler le vide, mais souvent je ne trouve pas le bon moyen de soulager ce sentiment	Je comprends que se sentir vide et seul à l'intérieur peut être une expérience difficile. Il peut être décourageant de ne pas trouver immédiatement quelque chose qui puisse soulager ce sentiment. Voici quelques suggestions pour vous aider à combler ce vide et à soulager cette sensation de solitude : 1. Exprimez vos émotions : Parlez de vos sentiments à quelqu'un en qui vous avez confiance, comme …
