# Supplementary material
Source: ML conference proceedings conference paper supplement (https://openreview.net/forum?id=JL42j1BL5h)
Supplement: supplementary_material [file Mental_Health_gpt.xlsx]

## Sheet: Sheet1
Input	Output
আমি প্রায় নিঃসঙ্গ এবং অসহায় বোধ করতাম, কেউ আমাকে বুঝতে পারত না, এমনকি আমি নিজেকে পরাজিত মনে করতাম, যার কোনও মূল্য বা অর্থ ছিল না, এবং এই অনুভূতি আমাকে এতটাই হতাশ এবংমরিয়া করে তুলেছিলো যে আমি কীভাবে তাদের থেকে মুক্তি পাব তা জানতাম না।	আমি আপনার এই অনুভূতির জন্য খুব ক্ষমার আপনাকে জানাতে চাই। এমনকি সময়ের সাথে আপনার স্থিতিবন্ধ থাকাও ভালো নয়। তবে, কোনও বিষয়টি নিয়ে অনিশ্চয়তা না করে আপনি আপনার পূর্বের চেষ্টা করতে পারেন। নিচে কিছু উপদেশ দেয়া হলো: 1. কথা বলুন: মনে রাখবেন, আপনি নিজেকে সর্বাধিক বোধ করাতে পারবেন। যারা দুঃখিত বা সহায়তার প্রয়োজন বুঝতে ব্যর্থ, তাদের জানান আপনার সমস্যা এবং কারন এবং তাদের সহায়তা করতে চাই। আপনার বিনা …
এমনকি যদি আমি চিপসের একটি ব্যাগ কিনতে যাচ্ছি, আমি উদ্বিগ্ন যে লোকেরা ভাববে যে আমি খুব বেশি আত্ম-পরাজিত আচরণ খাচ্ছি	আপনি চিন্তা করেন এমন ব্যাপারে এগিয়ে থাকেন, যেটা খুব ভালো কাজ। একজন সম্ভাব্য লোক যেভাবে আপনার আচরণ পছন্দ করবে তা মনে করে না। আপনি কেউকে খুবই প্রতিষ্ঠিত আচরণ খাচ্ছেন বলে বিবেচনা করা উচিত নয়। শুধুমাত্র নিজেকে ভালো আচরণ করানো প্রয়োজন, অন্যদের মধ্যে আপনার চেয়ে আগের কষ্ট ভুলে যাওয়া দরকার। আপনি যদি মনে করেন যে আপনার আচরণ ভাল নয়, তাহলে প্রতিষ্ঠিত আচরণ অনুসরণ করতে চেষ্টা করতে পারেন যাতে আপনি আরও চার…
আমি সর্বদা ক্লান্ত এবং শক্তিহীন বোধ করতাম, আমার কাজগুলিতে ফোকাস করতে বা এমনকি আমার আগ্রহের জিনিসগুলিতে কাজ করতে অক্ষম, যা আমাকে খুব হতাশ করেছিল।	আপনি যদি সর্বদা ক্লান্ত এবং শক্তিহীন বোধ করেন এবং আগ্রহের ক্ষেত্রে সফলতা না পাচ্ছেন, তবে কিছু পরিবর্তনের প্রয়োজন হতে পারে। নিম্নলিখিত কিছু পরামর্শ মেনে চলুনঃ 1. পুনরায় উপস্থিত হওয়ার পরিকল্পনা করুন: যখন আপনার উপাদান খ্রিস্টপ্রশ্ন থাকে বা ব্যর্থতা ঘটে, তখন অল্প সময় সরানো এবং চিন্তা করতে পারেন। সাধারণত ছোট উপাদানে কাজ করা শুরু করার আগে নিম্নোক্ত কিছু মেনে নিলে ভালো হতে পারেঃ - নিয়মিত দৈনিক স্বা…
সম্প্রতি, আমি ভাল ঘুমোতে পারি না, বা আমি যখন ঘুমিয়ে পড়ি তখন আমি দুঃস্বপ্ন দেখি এবং আমি যখন জেগে উঠি তখন আমি খুব ক্লান্ত এবং ক্লান্ত বোধ করি।	ঘুম সমস্যা আপনার তরফ থেকে অসুখজনক এবং সমস্যাগ্রস্ত অনুভব করেন। সমস্যাটির জন্য কিছু সাধারণ প্রয়োজনীয় করণীয় এখানে চেষ্টা করতে পারেন: 1. নিয়মিত ঘুমানোর উপর লক্ষ্য দিন: রাতে অনুষ্ঠানের আগেই ঘুমাতে চেষ্টা করুন। দিনভরে নিয়মিত ঘুমানোও গুরুত্বপূর্ণ। 2. ঘুমাতে আগ্রহ এবং স্থিরতা সৃষ্টি করুন: আগ্রহ নিয়ে পোশাক পরতে পারেন এবং জীবনের অন্যান্য কাজের মধ্যে একটা জ্যেষ্ঠ স্থান প্রদান করে ঘুমানোর জন্য। 3. স্বা…
যতবার আমি ডাক্তারের কাছে যাই, কোন উন্নতি হয় না, এবং আমার মেজাজ খারাপ হয়ে যায়, এবং আমি প্রায়ই আত্ম-দরদ এবং আত্ম-মমতায় পড়ে যাই	আপনার সমস্যার সমাধানে অপেক্ষা করে থাকা কিছু উপায় আছে যা আপনাকে সহায়তা করতে পারে। নিম্নলিখিত কয়েকটি উপায়টি আপনার জন্য প্রভাবশালী সবিধা হতে পারে: 1. সঠিক ডাক্তার নির্বাচন করুন: আপনার প্রবলেমটি নিয়ে সক্ষম ডাক্তারের সন্ধান করতে প্রয়াস করুন। একজন উপযুক্ত ও বিশেষজ্ঞ ডাক্তারের সাথে কথা বললে বিষয়টি বুঝতে এবং আপাতত সঠিক চিকিৎসা পেতে সহায়তা হতে পারে। 2. সতর্ক হোন সারাদিনে: আপনার স্বাস্থ্য সম্পর্কিত স…
আমি সর্বদা বিচ্ছিন্ন এবং বর্জন বোধ করতাম, এমনকি ভিড়ের মধ্যেও।	বিচ্ছিন্নতা এবং বর্জনের সাথে ব্যস্ত হওয়া সাধারণ অনুভূতি হতে পারে, কিন্তু এটি সহ্য করা সহজ নয়। আপনি নিজেকে কেমন ভালবাসেন না এমন মন্তব্যের প্রভাবে আপনি খুব ভাল বুঝ তে পারেন, কিন্তু যদি এটি আরও ব্যাকুল হয় বা আপনি এটি সমস্যা বোধ করেন, আপনাকে কিছু মার্গদর্শন দিতে পারি: 1. ধৈর্য রাখুন: ঘটনাটি সম্পর্কে খুব বিচ্ছিন্ন হওয়া সাধারণ। ঘটনাটি থেকে পূর্ববর্তী মনোভাব উন্নত করতে সময় লাগতে পারে। ধৈর্য ধারণ কর…
গেম বা নেটওয়ার্কের প্রতি নিজেকে আসক্ত করে তোলা একটি অদৃশ্য মানসিক চাপ।	আপনার বলা মানসিক চাপ গেম বা নেটওয়ার্কের কতটা বেশি দ্বিধা ধরে রাখতে পারে, তা থেকে আপনি সমস্যাটি উপস্থাপন করছেন। গেম বা নেটওয়ার্ক খেলতে সময় ব্যতীত হারানো যায় এবং মনের প্রতি নিশ্চয়তার সন্তুষ্টির বিশাল গেপ তৈরি হয়ে উঠতে পারে। আপনার মানসিক চাপ কমাতে নিচের কিছু পদক্ষেপ গ্রহণ করতে পারেন: 1. সময় ব্যবহার সীমাবদ্ধ করুন: গেম বা নেটওয়ার্ক ব্যবহার করার জন্য নির্দিষ্ট সময়সূচি তৈরি করুন। এতে সময় পরিচয…
আমি সম্প্রতি খুব বেশি চাপের মধ্যে ছিলাম, আমি প্রতিদিন খুব উদ্বিগ্ন বোধ করি, আমার ভাল ঘুম হয় না, আমার মাথা ব্যথা হয়, আমার হৃদ স্পন্দন দ্রুত হয় এবং আমার মনে হয় আমি যে কোনও সময় ভেঙে পড়তে যাচ্ছি	এই সমস্যাগুলি আপনার শারীরিক ও মানসিক চাপের কারণে দেখা দিচ্ছে। আপনার যথার্থ মতামত শ্বাস-প্রশ্বাসের নিয়ন্ত্রণ দায়িত্বশীল পাত্রটা প্রভাবিত হয়েছে বলেই বলতে পারি। চাপ কামানোর জন্য আপনার শরীরের সুস্থতার নিদর্শন দরকার হতে পারে। আমি কিছু পরামর্শ দিতে পারি যাতে আপনি এই সমস্যাগুলি অতিক্রান্ত করতে পারেন। 1. প্রতিদিন পর্যাপ্ত ঘুমানো: খুব উদ্বিগ্ন বোধ করলে সঠিক বেশি ঘুম পান প্রয়োজন। আপনার শরীরের সান্নিধ্য…
প্রতিবার যখন আমি অসুবিধা এবং বাধার সম্মুখীন হই, আমি সর্বদা আত্মবিশ্বাস এবং প্রেরণা হারাই এবং অনুভব করি যে আমি এটি পরিচালনা করতে পারি না	দুঃখিত জানাতে পারি যে অনেকেই এমন সময়ের সম্মুখীন হয়, যখন আমাদের আত্মবিশ্বাস এবং প্রেরণা হারায়। তবে, আপনার মাঝে আত্মবিশ্বাস এবং প্রেরণা পুনর্বাসন করার জন্য আপনি কিছু করতে পারেন। ১. নিজের ভালোবাসার বিষয়ে আত্ম-সামর্থ্য বাড়িয়ে দিন। নিজেকে আরও দিন হোক এমন কাজ করতে যেটি আপনি ভালোবাসেন এবং যেটি আপনাকে সুখী করে। ২. অসম্ভব প্রেরণা পাওয়ার জন্য আপনি নিয়মিত মেধার ব্যায়াম পরিচালনা করতে পারেন। ব্যায়ামে…
আমি সব সময় চিন্তিত ছিলাম যে আমি যা করছি তা যথেষ্ট ভাল নয়, এবং এটি আমাকে হতাশ করে তোলে যে আমি অনুভব করি যে আমি অন্যের চোখে আটকে আছি।	আপনার চিন্তিত হওয়া একটি সাধারণ পরিস্থিতি এবং এটি একটি সাধারণ সমস্যা যা অনেকেই অনুভব করেন। আপনি জানতে চাচ্ছেন কীভাবে এই চিন্তাগুলি মিটাতে পারেন। একটি উপায় হতে পারে আপাতত চিন্তা করা কাজের বিষয়ে পরিকল্পনা করা। আপনি আপনার কর্মকাণ্ডগুলি কেমন সম্পন্ন করতে পারেন এবং আপনি আপনার দক্ষতা বৃদ্ধি করতে যে ধরণের অনুশীলন আচরণ করতে চান তা বিচার করতে পারেন। পরেরটি হলে অনলাইন সংস্থান অথবা পাঠাগারে বিষয়ের উপর আর…
আমি সর্বদা চিন্তিত ছিলাম যে আমি সবকিছু ঠিকঠাক করছি কিনা, এবং অন্য লোকেরা আমাকে কী ভাববে বা সমালোচনা করবে তা নিয়ে ভয় পেতাম এবং ফলস্বরূপ আমি প্রায়শই বেদনাদায়ক আত্ম-সন্দেহে ডুবে যেতাম।	আপনার চিন্তা এবং অনুভবের কিছু মানসিক কমজোরতার মধ্যে পড়ছে অ্যাসিস্ট্যান্টরা সাহায্য করতে পারে। একটি ভাল প্রাক্টিস হতে পারে এমন একটি লিস্ট তৈরি করা যা আপনি সবসময় পরীক্ষা করতে পারেন আপনার কাজের ঠিকানা যাচাই করার জন্য। লোকের মতামত কর্তৃপক্ষের মতামত হিসাবে গ্রহণ করবার আগে, প্রথমে নিজের মতামত সম্বলিত আপনার কাজের বিষয়ে নিজেকে গোচানোটা চেষ্টা করুন। আরও সাহায্য পেতে নিম্নলিখিত কেটেগরী-গুলি ব্যবহার করতে…
যখন আপনার মনে হয় যে আপনি বিস্ফুরিত হতে চলেছেন তখন আপনি অন্যের চোখ থেকে লুকিয়ে থাকতে পারবেন না।	আপনার মনে হয় যখন আপনি বিস্ফুরিত হতে চলেছেন, আপনি অন্যের চোখ থেকে লুকিয়ে থাকতে পারেন না। তবে আপনি শ্বাস নিতে ও জীবন্ত থাকতে সর্বদা চেষ্টা করতে পারেন। আপনি যদি সাময়িকভাবে বিস্ফুরিত হন তবে বিশেষজ্ঞের সাহায্যের জন্য সাম্প্রতিক কাজ করতে নিবেন।
আমার পরিবার হঠাৎ একটি দুর্ঘটনার সম্মুখীন হয় এবং আমার বাবা-মা গুরুতর ভাবে আহত হন, যা আমাকে অসহায়, বিষণ্ণ এবং এমনকি বিষণ্ণ করে তোলে।	আমি আপনার মানসিক অস্থিতির জন্য আপনার জন্য সহায়তা করতে পারি। এই সময়ে মেধাতা কেউই এমন নয় যারা কোনও কিছু ঘটার সময়ে সেই সংগঠনে এসে দেখায় না। সাহায্যের জন্য আপনি কিছু করতে পারেন: 1. প্রথমেই, সাম্প্রতিক দুর্ঘটনার কারণে আপনার মন শান্ত এবং তাকিয়ে থাকার জন্য আপনার নিজের কাছে সময় নিয়ে নিন। এটাই অত্যন্ত জরুরি যে আপনি আপনার চিন্তা এবং অবস্থা সাময়িকভাবে জিবনমুখী রাখতে পারেন। 2. নিজের বক্তব্য এবং মন্ত…
আমি দেখতে পাই যে আমি এই অনুভূতিতে আরও বেশি হতাশ হয়ে পড়ছি যে আমি মানুষের সাথে থাকতে পছন্দ করি না, আমি সবসময় একা থাকতে পছন্দ করি, সামাজিক ক্রিয়াকলাপে বা আমার জীবনকে মানুষের সাথে ভাগ করে নেওয়ার কোনও আগ্রহ নেই।	আপনার মতামত স্বাভাবিক এবং ব্যক্তিগত এখনও এই বিষয়ে ভিত্তিহীন। কিছু মানুষ সামাজিক ক্রিয়াকলাপে অনুগত হয় এবং অন্যদের সংগে থাকতে ভালোবাসে, কিছু অন্যরা সামাজিক মানুষিক সংক্রমণে আরও কম আগ্রহ প্রদর্শন করে। যেকোনও পথ এবং আপনার সুখ-দুঃখ এবং আগ্রহের মাধ্যমে যেতে এটা আপনার নিকট চর্চায় থাকতে পারেন্। আপনি অনিষ্ট বা বেশি হতাশ হলে মনে হয় আপনি কিছুটা সাহায্য পেতে পারেন। যদি আপনি চান, তবে আপনাকে সামাজিক ক্রিয…
আমার নিয়ন্ত্রণ করার প্রবল ইচ্ছা আছে এবং সর্বদা আমার নিজের হাতে সবকিছু নিয়ন্ত্রণ করতে চাই, এবং অন্যদের হস্তক্ষেপ বা হস্তক্ষেপ করার অনুমতি দিই না, যা আন্তঃব্যক্তিক সম্পর্কের ভাঙ্গনের দিকে নিয়ে যায়	আপনার ইচ্ছা অনুযায়ী, আপনি নিজের নিয়ন্ত্রণে থাকতে চান এবং অন্যদের হস্তক্ষেপ করা মনে রাখতেন না। সেটাই একটি ভাল উদ্দেশ্য। তবে, মনে রাখবেন যে সম্পর্কগুলি ভাঙতে পারে এবং অন্যের সাহায্যে বা পরামর্শের স্বীকৃতি নিয়ে অন্যের সাথে আরও ভাল সম্পর্ক গঠন করা সম্ভব। তাই কিছু মানসিক স্বস্তিতে এবং সাম্প্রদায়িক মন্দনে দূর থাকার জন্য এটি গুরুত্বপূর্ণ যে আপনাকে সাহায্যের অনুমতি দেওয়া উচিত যখন এটি আপনার জন্য স্বা…
আমি প্রায়শই আমার মনে বিভ্রান্তি বোধ করি, যেন একই সময়ে আমার মাথায় অনেক বেশি চিন্তাভাবনা এবং কণ্ঠস্বর রয়েছে, যা আমাকে বিভ্রান্ত এবং হারিয়ে ফেলে।	এটা সামান্য ভ্রান্তি প্রতীক্ষিত হতে পারে যা আপনার মানসিক ব্যাপারগুলির ফলে হতে পারে। আমি কিছু উপায় উল্লেখ করতে পারি যা আপনাকে সহায়তা করতে পারে: 1. ধ্যানাবস্থা প্রদর্শন করুন: মনের এবং শরীরের স্থিরতা পড়ে এবং চিন্তা ব্যতিক্রম করা কমিয়ে দেয়। প্রাথমিক ধ্যানের প্রয়োজনীয়তা যেমন নিখুঁততা এবং স্থিরতার জন্য মনোনিয়ন্ত্রণ সফলতার জন্য জরুরী, তেমনি বিপদগ্রস্ত মনের জন্যও গুরুত্বপূর্ণ। 2. হালকা ব্যায়াম ক…
আমি যা কিছু করি তার জন্য কেন আমি আমার পরিবারের দ্বারা সমালোচিত হই	আপনি আপনার পরিবারের দ্বারা সমালোচিত হতে পারেন কারণ পরিবার সদায়ের এক গুরুত্বপূর্ণ অংশ। আপনার সফলতা, কঠিন পরিশ্রম ও সংসারবাদী ক্ষমতা প্রদান করার জন্য আপনার পরিবারকে আশির্বাদ দেওয়া যেতে পারে। সাধারণত, পরিবার প্রাপ্তি, সুযোগ সুবিধা নির্ভরশীলতা প্রদানে অবদান রাখতে পারে। আপনার পরিবারের সমর্থন একটি মূলকারণ যখন আপনি আপনার ক্ষুদ্র বা বড় লক্ষ্যগুলি পূরণ করতে চেষ্টা করেন। তাদের উপস্থিতি, প্রেরণাদায়ক কথা…
আমি ইদানীং সবসময় ক্লান্ত হয়ে পড়েছি, আমি প্রতিদিন ভাল বোধ করছি না এবং দীর্ঘ রাতের ঘুমের পরেও আমার কোনও উন্নতি হয় না।	একটি ক্লান্তির অবস্থা ও দীর্ঘ সময় ঘুম নিশ্চিত করতে পরামর্শ দেওয়া যেতে পারে বিভিন্ন কারণ বিবেচনা করা উচিত। প্রথমেই আপনার খাবার ও খাদ্যের পরিমাণ এবং গুণগত মান পর্যালোচনা করুন। স্বাস্থ্যকর খাদ্য আহার, পেয়াজের মতো যন্ত্রণাদায়ক পদার্থ থেকে বিরত থাকুন। নিয়মিত কার্যরত ব্যায়াম শেষে দীর্ঘসময় ঘুমিয়ে পড়ার চেষ্টা করুন। আরও কিছু অন্যান্য কারণ যেগুলি সবসময় তবে থাকতে পারে এমনটি হতে পারে টেনশন, অতিরিক্ত …
আমি মনে করি আমি সমস্ত প্রেরণা এবং আশা হারিয়ে ফেলেছি এবং জীবন অর্থহীন বোধ করে	আপনি প্রেরণাহীন বোধ করছেন এবং জীবনের কাছে আরও কিছু অর্থ পেতে চান। তারমধ্যে আচরণের কিছু সাধারণ ধাপ নিচ্ছি যেটা সহায়তা করতেও পারে: 1. চিন্তা ও স্থিরতা: আপনি আপনার মনের ভালবাসা ও মানসিক স্থিতিটি ইচ্ছাকৃত উন্নত এবং স্থায়ী করার জন্য ধন্যবাদ। ধাপটি আপনাকে আপনার প্রতিটি ভাবনা কে বিশ্লেষণ করে তারপর তা পরিবর্তন করতে সাহায্য করবে। আপনি চিন্তা করতে পারেন কি করছেন, কেন এবং কখন। 2. লক্ষ্য সেট করুন: আপনি নিজ…
আমি মাঝে মাঝে খুব নার্ভাস বোধ করি, এবং আমি মাঝে মাঝে খারাপও অনুভব করি, কিন্তু আমি জানি না কিভাবে আমার মেজাজ পরিবর্তন করব	আপনার নার্ভাস বোধ ও খারাপ অনুভবের সাথে সম্পর্কিত আপনার মেজাজ সহায়তা করার জন্য কিছু কমন পদক্ষেপ গ্রহণ করতে পারেন। নিচে কিছু পরামর্শ দেয়া হলো: ১. প্রতিদিন ধ্যান দিন: ধ্যান করতে পারেন মাসুম বিশ্বাসের উপর, মেধা স্থলি করতে পারেন সাধারণ বা অশারীর আবেগের ওপর, অথবা শরীরের সন্চালন গতি দিতে পারেন। ধ্যান করার মাধ্যমে আপনি আপনার মনের অবৈচ্ছেদ্য বিষয়গুলি স্পষ্ট করতে পারেন এবং শান্তি এবং প্রামাণিকতা পেতে পারেন…
আমি আমার নিজের চিন্তাভাবনা এবং উপলব্ধির সমস্যাগুলি অনুভব করি, আমি প্রায়শই অদ্ভুত শব্দ শুনি বা অদ্ভুত জিনিস দেখি এবং আমি খুব ভয় পাই	অদ্ভুত শব্দ এবং জিনিস দেখা আর ভয়ের সমস্যার কারণে আপনি প্রয়াস করতে পারেন নিম্নলিখিত পদক্ষেপগুলি নেওয়ার জন্য: 1. ইমান্দারের সাথে কথা বলুন: আপনার সমস্যা গম্ভীর হলে, চিন্তাভাবনা এবং উপলব্ধি সম্পর্কে আপনার স্বামী অথবা সন্তানের সাথে কথা বলুন। তাদের সমর্থন আপনাকে আরাম দিতে পারে। 2. একজন মনোযোগবদ্ধ থেকে দেখান: কোন চিকিৎসক বা মানসিক স্বাস্থ্যের পেশাদার সাথে কথা বলার জন্য যোগাযোগ করুন। তারা আপনাকে সঠিক …
আমি প্রায়শই নার্ভাস এবং উদ্বিগ্ন বোধ করি, আমার আবেগ এবং চাপ নিয়ন্ত্রণ করতে অক্ষম, যা আমাকে খুব অস্বস্তিকর এবং অস্থির করে তোলে।	স্বাস্থ্য সম্পর্কিত সমস্যা সম্পর্কে চিন্তা করা দরকার। আপনি যদি নার্ভাস এবং উদ্বিগ্ন বোধ করে থাকেন, তাহলে কিছু কার্যের মাধ্যমে আপনি নিজের চাপ এবং আবেগগুলি নিয়ন্ত্রণ করতে পারেন। ১. নিয়মিত ব্যায়াম করুন: সাপ্তাহিক ব্যায়াম আপনার মানসিক ও শারীরিক স্বাস্থ্যের ক্ষেত্রে সহায়তা করতে পারে। যোগাযোগ যে কোনও ব্যয়াম, যেমন যোগ, মেডিটেশন, শারীরিক ব্যায়াম আপনার সামগ্রিক ক্ষমতা বৃদ্ধি করতে সাহায্য করবে এবং আ…
আমি প্রায়শই একা এবং অসহায় বোধ করি এবং আমার চারপাশে কেউ থাকলেও খালি বোধ করি। আমি জানি না কেন এমন হচ্ছে, আমি কীভাবে সাহায্য চাইতে পারি?	আপনার এই অবস্থার জন্য মন্তব্য করতে পারি এবং নিম্নলিখিত আলোচনা করতে পারি: 1. প্রথমেই, লোকাল সামাজিক সম্পর্ক পরিবর্তন করার চেষ্টা করুন। আপনি আপনার ঘরের সদরবাজারে, পাঠাগাড়ে, বন্যার মাঠে বা কিছু আন্তঃপরিবারের বা প্রায়শই ভিজিট করা জন্য অনুরোধ করতে পারেন। এইভাবে আপনি নতুন সম্পর্ক গঠন করতে পারেন এবং নিজেকে অসহায় নিয়ে উঠতে মানসিক ভাবে সামর্থ্য পাবেন। 2. স্থানীয় সমাজের স্থানীয় সেবা সংস্থা, প্রয়োজনী…
আমি অতীতে আঘাত পেয়েছি, এবং এখন আমি সবসময় ভয় এবং যন্ত্রণার সাথে সেই অভিজ্ঞতাটি স্মরণ করি এবং এই আবেগটি কাটিয়ে উঠতে আমাকে সাহায্য চাইতে হবে।	আমি বুঝতে পারি কতটা কঠিন এই জীবনে একটি আঘাতের অভিজ্ঞতা অনুভব করে এটি ছাড়াও অন্যদের বিভিন্ন জন্য হতে পারে। এইটা মান নেই কেন, আপনার মনে স্নেহ ও যত্নের প্রবণতা এর সাথে মিলে থাকলেও এখানে লক্ষ করবো। নিম্নলিখিত কিছু প্রক্রিয়া এবং পরামর্শ আপনাকে সাহায্য করতে পারে: 1. আপনার অভিজ্ঞতাটি স্মরণ করা এবং তা সাময়িক অবস্থায় রাখা সহজ নেই। এটি ধারণা করা টুকরো টুকরো করে বিভিন্ন মানসিক ও শারীরিক প্রশিক্ষণ ব্যবহার…
আমি অতীতের স্মৃতি থেকে পরিত্রাণ পেতে পারি না, এবং যখনই আমি কিছু বিষয়ে চিন্তা করি, আমি খুব বেদনাদায়ক বোধ করি এবং এটি আমার দৈনন্দিন জীবনকেও প্রভাবিত করে	অতীতের স্মৃতি থেকে পরিত্রাণ পাওয়া কোন সহায়তা করা যায় না, কারণ এটা হারিয়ে গেছে এবং পুনঃপেতের কোন উপায় নেই। আপনি কেমন সময়ে চিন্তা করেন তা নির্ভর করে আপনার জীবনের বিভিন্ন দশার উপর। খুব বেদনাদায়ক বোধ করা স্বাভাবিক হলেও এটি আপনার সাধারণ জীবনকে অতিরিক্ত প্রভাবিত করে দেয় না। কিন্তু যদি আপনি মনে করেন যে আপনার বেদনাগ্রস্ততা আপনার দৈনন্দিন জীবনের কাজে বাধা তৈরি করছে বা সন্তাপ সৃষ্টি করছে, তাহলে এটি…
আমি ধমক দিতাম এবং এখন যখনই আমি এটি সম্পর্কে চিন্তা করি আমি ভয় পাই এবং এমনকি দুঃস্বপ্নও দেখি	আপনি সঠিকভাবে উপস্থিত হয়েছেন এবং আপনাকে পাঠিয়ে এমন সমস্যার সাম্প্রতিক কারণ নির্ধারণ করার জন্য ধন্যবাদ। ধমক পাঠানো দ্বারা আপনার সমস্যার কারণ বিচার করা যেতে পারে এমন একটি সাম্প্রতিক ইভেন্ট সুপারিশ করা যেতে পারে। ধমক বা দুঃস্মৃতির সাথে সম্পর্কিত ভয় ও দুঃস্বপ্নের কারণ হতে পারে আপনার মনের ওপর জিজ্ঞাসাবাদ বা এটির যে-কোনও প্রতিক্রিয়ার ফলে হতে পারে। ধমক এবং আপনার জীবনের পরিচ্ছেদ নিয়ে চিন্তিত থাকার জ…
আমি আরও বেশি একা বোধ করি, কোন বন্ধু নেই, কোন আত্মীয় নেই, এমনকি যদি কেউ আশেপাশে থাকে, আমি খুব খালি এবং অস্বস্তি বোধ করি	আপনার এই অবস্থাটি সম্পর্কে আমি খারাপ বোধ করছি। প্রথমেই, আপনাকে বলতে চাই যে আমাকে খুব দুঃখ হচ্ছে আপনার মতো একটি সমস্যা সমাধান করতে সহায়তা করার জন্য আরও কাছাকাছি কারো প্রয়োজন। আরোগ্য ও সুস্থতা কেন্দ্রিয় বিষয়, তাই আমি আপনাকে নির্দেশ দেব যে আপনার চিন্তাগুলি একটি নিপীড়নময় মাধ্যমে আপনার যত্নের দরকার। প্রথমেই, অন্যের সাথে যোগাযোগ পরিবর্তন করার চেষ্টা করুন। সামাজিক মাধ্যম ব্যবহার করে নতুন মানুষের স…
আমি সবসময় মনে করি যে আমি মনোযোগ দিতে পারি না, কাজগুলি সম্পূর্ণ করা কঠিন এবং আমি প্রায়ই ক্লান্ত এবং বিষণ্ণ থাকি	এটি সাধারণত মনে হয় যখন আমাদের মানসিক স্বাস্থ্য নিরাপত্তা চাইতে হয় এবং সঠিকভাবে মনোযোগ দিতে পারি না। তবে আমি কিছু পরামর্শ দিতে চাইতে পারি যাতে আপনি আপনার মনোযোগ বা কাজগুলি সম্পূর্ণ করতে সহায়তা পান: 1. তাড়াতাড়ি শুরু করুন: নিয়মিত মনোযোগ দেয়া শুরু করাটি গুরুত্বপূর্ণ। শুরুতে এটি কঠিন হতে পারে, তবে ক্রমশ সহজ হয়ে আসবে। এটি যেখানে সময় নেবে তার জন্য আপনাকে ধৈর্য রাখতে হবে। 2. উৎসাহ বা ঊর্জা করতে …
আমি প্রায়শই নিঃসঙ্গ এবং হারিয়ে যাওয়া অনুভব করি, অন্যদের সাথে ঘনিষ্ঠ সম্পর্ক গড়ে তুলতে অক্ষম এবং এমনকি আমার চারপাশের মানুষ এবং জিনিসগুলির প্রতি আগ্রহ এবং উত্সাহ হারিয়ে ফেলি।	আপনার অবস্থাটি ব্যাখ্যা করার জন্য আমি আপনার জন্য কিছু পরামর্শ দিতে পারি। ১. নিজের সাথে যোগাযোগ করুন: আপনি নিঃসঙ্গ এবং অনুভব করেন যে আপনার সাথে সমানুভূতি থাকে না। প্রথমেই, আপনার নিজের সাথে যোগাযোগ করার চেষ্টা করুন। আপনার মন্তব্য, অনুপ্রেরণা বা উপস্থিতি চেষ্টা করতে পারেন যা আপনাকে অন্যদের কাছে বেশি সম্প্রেসন করতে সাহায্য করবে। ২. শৃঙ্খলা গঠন করুন: বিভিন্ন স্বেচ্ছাসেবকরা সংগঠিত রয়েছেন যাতে তারা সাথ…
আমি নিঃসঙ্গ এবং হারিয়ে যাওয়া অনুভব করি এবং আমি অনুভব করি যে আমি অন্যদের সাথে ঘনিষ্ঠ সম্পর্ক গড়ে তুলতে পারি না, যা আমাকে খুব বিষণ্ণ এবং অসহায় বোধ করে।	আপনি নিঃসঙ্গ এবং হারিয়ে গেছেন এবং এটা আপনার জন্য অনুত্তেজন্য ব্যতিক্রম হতে পারে। একটি ঘনিষ্ঠ সম্পর্ক গড়ার জন্য আপনি কিছু প্রয়াস ও সময় প্রয়োজন হবে। নিচে কয়েকটি পরামর্শ দেয়া হলো যা আপনার সাহায্য করতে পারে: 1. নিজেকে খারাপ অনুভব করবেন না: নিজের সাথে খুব কঠিন হলেও, আপনি পরিশ্রম করতে পারেন না কিন্তু নিজের সাথে মেধা দিয়ে থাকার চেষ্টা করুন। যদি আপনি নিজেকে শ্রদ্ধার্হ মনে না করেন তবে অন্যদের সাথে …
আমার চারপাশের সবাই খুশি, কিন্তু আমি ভিতরে শূন্য অনুভব করি, কোন আনন্দ উপভোগ করতে পারি না	আমি বুঝতে পারি যে ভাইরাস সম্পর্কিত সমস্যার সঙ্গে সহজেই কঠিন হতে পারে। আপনার স্বাস্থ্য নিয়ে বিচিত্র পরিবর্তন গড়ে তুলতে পারে এবং মনের সমস্যা তৈরি করতে পারে। সহজ উপায়ে আপনাকে ভাল বোধ করতে পারে শারীরিক অভ্যাস ও মানসিক কর্মকান্ডে কিছু পরিবর্তন করা যেতে পারে। ১. শারীরিক কাজ করুন: নিয়মিত শারীরিক কাজ এবং বিশ্রাম সময় সঠিক পরিমাণে ভালো খুব গুরুত্বপূর্ণ। প্রতিদিন কিছু সময় কালোর সাথে ঘুরে দেখবেন। এটি আপন…
আমার স্ব-সম্মান কম ছিল এবং আমি প্রায়শই অকেজো এবং তুচ্ছ বোধ করতাম, যার ফলে আমি আমার স্বপ্ন এবং লক্ষ্যগুলি অনুসরণ করতে ভয় পাই, ব্যর্থতার ভয়ে এবং অন্যদের দ্বারা অপমানিত হওয়ার ভয়ে।	এই ধরনের সমস্যার সমাধানে আমি আপনাকে কিছু পরামর্শ দিতে পারি: ১. নিজের সাথে মিলে চলুন: আপনার স্ব-সম্মান বৃদ্ধির জন্য প্রথম ধাপ হলে নিজের সাথে মিলে চলা। আপনার নিজের মতন হওয়ার সাথে আরো আপনজনক হবেন। আপনার স্বপ্ন এবং লক্ষ্যে নিজের বিশ্বাস রাখুন এবং শুধুমাত্র নিজের জন্য নয়, পরিবার বা সমাজের জন্য কাজ করছেন বলে বিশ্বাস রাখুন। ২. বিশ্বাস এবং আত্মবিশ্বাস বৃদ্ধি: যখন আপনি নিজেকে অপমানিত বা তুচ্ছ মনে করতেন,…
আমি নিজেকে জিনিসের প্রতি অত্যধিক সংবেদনশীল হয়ে উঠতে দেখি এবং প্রায়শই অস্থির বোধ করি এবং ছোট ছোট জিনিস নিয়ে চিন্তিত বোধ করি	এটা আমাদের কাছে সাধারণত দেখা যায় যে কেউই এই ধরনের অবস্থায় পরিপূর্ণ নয়। তবে কিছু পরামর্শ এবং প্রায়শই প্রয়োজনীয় পরিমার্জনের জন্য তথ্য প্রদান করতে পারি: 1. ধরুন আপনি ব্যয়বহুল জীবনযাপন করছেন আর অনেক কম সময় কাটাচ্ছেন। এমন ক্ষেত্রে, আপনার সময় পরিচ্ছন্নতায় আরও উন্নয়ন করার জন্য রোজমার্য প্রাথমিক কাজের পরিস্থিতি নিশ্চিত করুন। উদাহরণস্বরূপ, আপনার পর্যাপ্ত ঘুমের সুযোগ নিশ্চিত করুন, ভোজনের মাধ্যমে…
আমার বাবা-মা সবসময় আমাকে একজন ভালো মানুষ হওয়ার জন্য উচ্চ প্রত্যাশা করেছিলেন, কিন্তু আমি অনুভব করেছি যে আমি তাদের মান অনুযায়ী ছিলাম না, আমি উদ্বিগ্ন এবং নিম্ন আত্মসম্মানবোধ করি।	আপনার জন্য খুবই দুঃখের বিষয় প্রকাশ করার জন্য আমি মনোয়োগ দিচ্ছি। এটা অন্যদের মত হয়ে পড়তে পারে, কিন্তু মনে রাখবেন যে আপনার মান এবং অর্থান্বিত ছবি আপনার নিজের মত এবং আপনার ভাবনাগুলি আপনার স্বচ্ছ এবং স্বকার্যগ্রাহী প্রকৃতিতে বলে। আপনার আত্মবিশ্বাস সন্ন্যাসী হওয়ার ব্যাপারে আপনার কিছু আশা থাকলে আপনি প্রায়শই অনেক বেশি নিজের সাথে মিল দিয়েছেন। আপনি ধৈর্যশীল হতে পারেন এবং নিজেকে বিকল্প ভাব থেকে মুক্…
আমি প্রতিদিন স্বপ্ন দেখি, বারবার তা পুনরাবৃত্তি করি, যেন কোন প্রস্থান ছাড়াই গোলকধাঁধায় হারিয়ে যাই	স্বপ্ন দেখা আপনার জীবনের একটি স্বাভাবিক ঘটনা। অনেকেই প্রতিদিন স্বপ্ন দেখেন এবং এর মাধ্যমে মানসিক এবং সামাজিক অবস্থায় সুধার পানে। তবে, পুনরাবৃত্তি করা অনুপ্যাসিত ঘটনায় ভালো নয়। এই সমস্যার মূল কারণ সঠিকভাবে জ্ঞাত না থাকলে সম্ভবত এমন হতে পারে যে আপনি জীবনে কোন বিপর্যয়মূলক স্থান হলেও এই ধাঁধাতে গতি করছেন। এই ধাঁধার জন্য সুপ্ত মন কার্যক্রমের মাধ্যমে আচরণ করে এমন স্বপ্ন গঠন করতে পারে। তবে, যে কোন সমস্…
যখনই আমি একা থাকি, আমি আগে যা ঘটেছিল তার সবকিছুই ভাবি, এবং সবকিছুই আমাকে খুব দু: খিত করে তোলে	অনেকেরই পাশে না থাকলে আমরা অপরিষ্কার ভাবটা অনেক বেশি বোঝার ক্ষমতা পাই। কিন্তু তার মানে এই নয় যে আপনি অনেক দুঃখিত হওয়ার অর্থ আপনি সাধারণ জীবনে যাত্রা করতে পারবেন না। প্রতিবার আপনি একাকিত্যে থাকলে আপনার মনের প্রাথমিক প্রয়োজনগুলি পূরণ করার কোন উপায় আছে?
আমার শরীর দেখলে আমার খুব কুৎসিত লাগে, খুব খারাপ লাগে	আপনার যদি অসুস্থ বা সমস্যাগ্রস্ত অনুভব করেন, তবে আপনাকে একজন চিকিৎসকের পরামর্শের প্রয়োজন হতে পারে। চিকিৎসকের সাথে আপনি আপনার সমস্যার বিস্তারিত আলোচনা করতে পারেন এবং শরীরের উপর যে ধরণের আক্রমণ অনুভব করছেন সেগুলি জানাতে পারেন। বিশেষজ্ঞ মনে হলে, আপনার পাশাপাশি বা অস্পষ্ট মনে হলে, সঠিক চিকিৎসা ও সামগ্রিক স্বাস্থ্য পরামর্শ পেতে অন্যতম চিকিৎসকের সাথে পরার্ত্থক্য করুন। সাধারণত শরীরের ব্যাপক আক্রমণের জন্…
আমার অটিজম আছে, আমি জানি না কিভাবে অন্যদের সাথে যোগাযোগ করতে হয়, আমি সম্পূর্ণ ভিন্ন জগতে বিচ্ছিন্ন বোধ করি, আমি খুব দুঃখী এবং অসহায় বোধ করি।	আপনাকে বুঝতে পারি যে অটিজম একটি ব্যক্তিগত বৈশিষ্ট্য, এবং আপনার জন্য কিছু উপায় আছে যা সাহায্য করতে পারে যোগাযোগ বিষয়ে। একটি পরিচিত ও সুন্দর তথ্যচিত্র দিয়ে শুরু করি যাতে একটি বিষয়ে যথার্থ ধারণা পাওয়া যায়: - অটিজম একটি স্পেকট্রাম বৈকল্পিক গর্ত হিসেবে বিবেচিত হয়, এটা মানে হয় না যে সকল অটিজম রোগীর বৈশিষ্ট্যসমূহ একই ধরণের হয়। প্রতিটি প্রকারের অটিজমে আপনার প্রকৃতির মধ্যে ভিন্ন ধরণের সমান্তরালতা…
আমার এক বন্ধু আমার সঙ্গে বিশ্বাসঘাতকতা করেছিল এবং এটি আমাকে এতটাই আঘাত করেছিল যে আমি মানবতা ও বন্ধুত্বের নির্ভরযোগ্যতা নিয়ে সন্দেহ করতে শুরু করেছিলাম এবং এমনকি নিজেকে বন্ধ করে অন্যদের থেকে নিজেকে বিচ্ছিন্ন করতে শুরু করেছিলাম।	সেটি আপনার জন্য অত্যন্ত দুঃখজনক হতে পারে। বহুদূর থেকেই বুঝা যাচ্ছে যে আপনারই কাছে সঙ্গের এই অভিজ্ঞতা অনেকটা মন্দ করেছে। কিন্তু এমন সঙ্গের মধ্যে আপনার নিজের বিশ্বাসে কম করার কারণে যেভাবে মানবতা ও বন্ধুত্ব নিয়ে সন্দেহ করতে শুরু করেছেন, তা ঠিক নয়। আপনি এই গুরুত্বপূর্ণ মানবিক মানসিকতা পুনরুদ্ধার করতে চাইলে কিছু অপশন মনে রাখতে পারেন: ১. বিষয়টিকে যাচাই করুন: সঙ্গের এই অভিজ্ঞতা সত্যিকার ভাবেই বিশ্বাস…
আজকের সমাজে, লোকেরা প্রায়শই নিজেকে ছেড়ে দেয় বা এমনকি আত্মহত্যা করে কারণ তারা তাদের কাজ সম্পূর্ণ করতে পারে না।	আত্মহত্যা একটি গভীর ও গুরুতর সমস্যা যা মানসিক স্বাস্থ্য সম্পর্কে আশুভ পরিণাম সৃষ্টি করতে পারে। এই ধরনের সমস্যাগুলির জন্য প্রশিক্ষিত মানসিক স্বাস্থ্য পেশাগতদের সংশোধন করার প্রয়োজন হলেও সামাজিক সংশোধনের দরকার পড়ে। যদি আপনি কারো সঙ্গে আলাপ করতে না পারেন কিংবা কারো সঙ্গে সাহায্য চান তাহলে তথ্য ও সমর্থনের জন্য স্থানীয় মানসিক স্বাস্থ্য পেশাগতদের সাথে যোগাযোগ করা উচিত। তারা আপনাকে উপযুক্ত সহায়তা ও স…
আমি সবসময় আমার অতীত এবং ভবিষ্যতের কথা ভাবি, এটি নিয়ে উদ্বিগ্ন এবং অনিশ্চিত, এবং আমি জানি না কীভাবে এটি মোকাবেলা করতে হয়।	অতীত এবং ভবিষ্যতের কথা ভাবতে একটি সাময়িক হার্ম মানে আপনি একান্তই নয়। আপনি নতুন একটি ধারণা বা চিন্তা পেলেও, এটি এই মনস্থলে থাকা এবং মোকাবেলা করার জন্য সহজ হয় না। একটি উপায় হলো তার সঙ্গে যোগাযোগ করার চেষ্টা করা, যেমন আপনি যদি এই কথাগুলি আপাতত অনিশ্চিত করছেন। কাউকে সাথে কথা বলতে অনিশ্চয় বোধ করলেন, আপনি এই কথা সঙ্গে আপনার চিন্তা-ভাবনা আপাত করার সময় কেন আনতেন। স্থিরতায় থাকার চেষ্টা করতে পারেন য…
যখনই আমি একটি বড় দলের সামনে থাকি তখন আমি সবসময় বিশ্রী বোধ করি	বিশ্রী বোধ করা কর্তৃপক্ষে একটি গুরুত্বপূর্ণ গুণ। এটি সুন্দর যে আপনি একটি বড় দলের সামনে থাকলেও আপনি আপনার স্বয়ংক্রিয়তা এবং আপনার দায়িত্বসমূহের প্রতি বিশ্রী সচেতনতা বজায় রাখতে চেষ্টা করেন। আপনি আপনার যোগদানকারীদের সাহায্য করার জন্য সময় ও পর্যাপ্ত সম্পদের ব্যবহার করেন, এবং আপনি ভবিষ্যতে বিপুল উপকারিতা প্রাপ্ত করার জন্য কাজ করেন। বিশ্রী বোধ রাখা আপনাকে একজন ভাল দলের সদস্য করবে এবং আপনাকে সারাদি…
আমি আমার চেহারা নিয়ে অসন্তুষ্ট এবং সর্বদা কুৎসিত বোধ করি, যা আমাকে সামাজিকীকরণ এবং বন্ধুত্বে খুব অবিশ্বাসী করে তোলে। আমি কীভাবে এই মানসিকতা পরিবর্তন করতে পারি?	এমন মানসিকতা পরিবর্তন করা সহজ কাজ নয়, কিন্তু নিশ্চিত ভাবে সম্ভব। নিম্নলিখিত কিছু পদক্ষেপ নেওয়া আপনাকে সাহায্য করতে পারে: ১. স্বাস্থ্য সংক্রান্ত যথায়থ যত্ন নিন: পরিবারের ডাক্তারের সাথে কথা বলুন এবং মানসিক স্বাস্থ্য সেবা অনুসরণ করুন। নিয়মিত শারীরিক ব্যায়াম, পর্যাপ্ত খাদ্য এবং পর্যাপ্ত প্রমাণে পানি পানিয়ে আপনার শরীর স্বাস্থ্যকে উন্নত করতে পারে। ২. অনিয়মিত মানসিক ডোজ পরিক্রমা করুন: মানসিক সহিত…
আমি ভবিষ্যৎ নিয়ে ভয় ও উদ্বেগে পূর্ণ, এবং ভবিষ্যতে চ্যালেঞ্জ ও চাপের সাথে কীভাবে মোকাবিলা করতে হয় তা আমি জানি না।	কোন কথা কি আপনি ভবিষ্যতে সম্মান এবং সাফল্য অর্জন করার জন্য দীর্ঘসময়িক লক্ষ্য ঠিক করতে পারবেন তা গুরুত্বপূর্ন। দ্রুত সম্পাদন করতে পারা গঠিত পরিকল্পনা করা বা দৈনন্দিন পরিকল্পনার জন্য কিছু সময় নিয়ে লক্ষ্যে এগিয়ে যেতে পারে। এছাড়াও, ভবিষ্যতের উদ্বুদ্ধতা এবং ওজন গ্রহণের জন্য মেডিটেশন, যোগাযোগের কার্যক্রম সম্প্রসারণ ও ব্যক্তিগত বিকাশের জন্য কয়েকটি মাধ্যম ব্যবহার করা যেতে পারে। সাধারণত, একটি সুধারে…
আমি প্রায়শই নিজেকে অবিরাম চিন্তাভাবনার চক্রের মধ্যে খুঁজে পাই, একই সমস্যা বা পরিস্থিতি সম্পর্কে বারবার চিন্তা করি, নিজেকে পরিত্রাণ পেতে অক্ষম, যার ফলে ঘুমের গুণমান হ্রাস পায় এবং দৈনন্দিন জীবনকে প্রভাবিত করে।	বিশ্বাস করুন, এই সমস্যা অনেকেরই উপস্থিত। আপনার বিশ্বাস করা উচিত যে আপনি নিজেকে অবিরাম চিন্তা থেকে মুক্ত করতে পারবেন। একটি ভাল পার্থক্য সৃষ্টি করতে পারে মনে হলেও চিন্তাভাবনা সবসময় কিন্তু কার্যকরী নয়। নিচে কিছু কর্মপরিকল্পনা রয়েছে যা আপনাকে সাহায্য করতে পারে: ১. দৈনিক মেডিটেশন এবং মনোযোগ প্রশিক্ষণ: মেডিটেশন এবং মনোযোগ প্রশিক্ষণ দ্বারা আপনি মনের শান্তি এবং ব্যক্তিগত উন্নতি পেতে পারেন। এটি আপনাকে …
আমি প্রায়ই বিষণ্ণ এবং বিষণ্ণ বোধ করি, জীবনের আনন্দ এবং প্রেরণা হারিয়ে ফেলি, এবং ভবিষ্যতের প্রতি কোন আস্থা নেই, এই আবেগ আমাকে খুব বেদনাদায়ক এবং অসহায় বোধ করে	আপনার বোধগম্য সামস্যার সাথে অবগত থাকার জন্য আমি আপনার পাশে আছি। জীবনে কিছুটা হারানো অনুভব এবং ভবিষ্যতের প্রতি আস্থা না থাকা অনেকের মধ্যে সাধারণ ভাবে পোষিত হয়। তবে, এর সাথে মোটামোটি সমস্যাগুলি নিয়ে আপনার জন্য কিছু উপায় রয়েছে। ১. মানসিক স্বাস্থ্যঃ আপনার মানসিক স্বাস্থ্য সাধারণত ভাল থাকলে আপনি জীবনের আরও বেশি আনন্দ পাবেন। স্বাস্থ্যকর জীবনযাপনের জন্য প্রতিদিন যথাযথ খাদ্য গ্রহণ করবেন, যোগাযোগের মা…
সম্প্রতি, তাদের বাচ্চারা প্রায়শই তাদের মেজাজ হারিয়ে ফেলে এমনকি ঘরের জিনিসপত্রও নষ্ট করে দেয়, যা হতাশার লক্ষণ হতে পারে।	এই ধরনের সমস্যার সমাধানে কিছু প্রধান ধারণা রয়েছে যা আপনাকে সহায়তা করতে পারে: 1. সমস্যাটি সম্পূর্ণরূপে বেশি সময়ের জন্য থাকলে স্থিতিশীর্ণতা হতে পারে। তাই, একটি রুটিন আবাদের জন্য এবং প্রতিস্পর্ধামূলক কাজকে সহজ বানানোর জন্য নির্ধারিত সময় পরিধি সেট করা উচিত। 2. আপনার শিশুর হৃদয়ের কথার কাছাকাছি থাকার সুযোগ দাও। তারা তাদের মনে যা করতে চায় তা ব্যক্ত করতে পারেন। এখানে আপনার শুনতে হবে এবং তাদের বিষয়…
আমি প্রায়ই চাপ এবং উদ্বিগ্ন বোধ করি, এমনকি ছোট জিনিসগুলি আমাকে অস্থির এবং উত্তেজনা অনুভব করতে পারে, আরাম করা এবং জীবন উপভোগ করা কঠিন	আপনি নিরাময় থাকার কিছু প্রয়োজনীয় পদক্ষেপ নিতে পারেন যেগুলো আপনাকে চাপ ও উদ্বিগ্নতার থেকে মুক্তি দিতে সাহায্য করবে। নিচে কিছু সামগ্রীমূলক টিপস দেওয়া হলো: ১. শারীরিক ব্যায়াম: নির্ধারিত সময়ে দৈনন্দিন শারীরিক ব্যায়ামের সাথে যুক্ত হতে পারেন। ব্যায়ামের মাধ্যমে আপনি গুলিতে সন্তোষ আরোপ করতে পারেন। যোগাযোগ করুন একজন পুষ্টিবান করকম বা সাধারণ খাবার কারী এবং একটি প্রাথমিক শারীরিক পরীক্ষার হিসাবে একজন…
আমি আমার শরীর নিয়ে খুব অসন্তুষ্ট, আমি সবসময় খুব মোটা বা খুব পাতলা বোধ করি, এবং আমি জানি না কিভাবে আমার শরীরকে গ্রহণ করব	আপনি শরীরের সামগ্রিক স্বাস্থ্য ও কেশান্তি বজায় রাখার জন্য নিম্নলিখিত কয়েকটি পদক্ষেপ নিতে পারেন: 1. সঠিক খাদ্য পরিবেশন করুন: আপনার খাবারের মধ্যে প্রোটিন, সবজি, ফল এবং শক্তির উৎস অন্তর্ভুক্ত করুন। সুস্থ খাবার বিন্যাস এবং পরিমাণ বজায় রাখতে চেষ্টা করুন। 2. নিয়মিত ব্যায়াম করুন: প্রতিদিন নির্দিষ্ট সময়ে ব্যায়াম করুন। আপনি যেকোনো শারীরিক কার্যকলাপ চয়ন করতে পারেন, যেমন চলা, ডান্স করা, জিম গিয়ে উষ…
আমার নিজের পারফরম্যান্স এবং ক্ষমতার প্রতি আমার আত্মবিশ্বাসের অভাব রয়েছে। আমি সবসময় অনুভব করি যে আমি ভাল করতে পারি না, এবং আমি ব্যর্থ হওয়ার ভয় পাই এবং অন্যদের দ্বারা উপহাস করা হয়।	আমান্ত্রণ জানাচ্ছি যে এই ধরনের সামস্যার সমাধানে কিছু পদক্ষেপ নিতে পারি। প্রথম করে, আপনি নিজের সাথে একটি সাক্ষাৎ সম্পর্ক প্রতিষ্ঠা করুন। অবসরপ্রাপ্ত সময়ে নিজেকে জাছাই দিন, আপনার সাধারণ কর্মকাণ্ডে কী আপনি ভালো করতে পারেন তা লক্ষ্য করুন। ইচ্ছেমতো সময় নেওয়ার জন্য নিজের সাথে মনোযোগ করুন, শান্তি এবং ধৈর্য সাধারণ করুন। এছাড়াও, আপনি নিজের সাথে বিচার করুন এবং মনযোগ করুন যে প্রতিযোগিতা এবং ব্যর্থতা অস্ব…
আমার আবেগ খুব বেশি ছিল, কখনও খুব উত্তেজিত, এবং কখনও কখনও খুব নিচু, বলার কোনও নিয়ম ছিল না।	আপনার ব্যক্তিগত আবেগ এবং উত্তেজনা নিয়ে কয়েকটি টিপস দিয়ে দিতে পারি: 1. উপযুক্ত মাধ্যম খুলে রাখুন: আপনি খুব জনপ্রিয় মাধ্যম খুলে রাখলে আপনার আবেগ কমবে। অত্যাধিক উল্লেখযোগ্য সংবাদপত্রের প্রতিবেশী হওয়ার পরিবেশে থাকতে পারেন কিন্তু কখনও-কখনও এই সংবাদপত্রের ব্যবসা একটু ঘাটতিও হয়ে যায়, এ সময় আপাতত উদাসী অবস্থা থেকে ঈতোয়ার চেষ্টা করতে গেলেন না। 2. নিয়মিত কোনও ব্যায়াম পদ্ধতি অনুযায়ী সময় কাটান: ব…
আমি যখন ভিড়ের মধ্যে থাকতাম, তখন সবসময় অনুভব করতাম যে আমাকে উপেক্ষা করা হয়েছে, এমনকি আমার অস্তিত্বও নেই এবং এটি আমাকে এত একাকী এবং হারিয়ে গেছে বলে মনে করত।	বিভিন্ন কারণে এমন অনুভব করতে পারেন। ধৈর্য ধারণ করুন। এটি সাধারণ একটি মনের অবস্থা যা মানসিক স্বাস্থ্যের উপর প্রভাব ফেলতে পারে। নিম্নলিখিত কিছু উপায়ে আপনি এই সমস্যার সাম্প্রতিক থেকে স্থায়ী মুক্তি পাবেন: 1. আপনার মনে পুরাতন বদলের বিষয়ে ধ্যান দিন। স্বাধীন মনের শক্তি আপনাকে ভালো বোধ করতে সাহায্য করবে। 2. পরিবেশে ছোট্ট ছোট্ট উত্সাহবোধক কাজ সন্নিপত্তিতে করুন। প্রাতিনিধিক দৃশ্য, কর্মসূচি বা পড়ার জন্য…
আমি প্রায়ই অনুভব করি যে আমি অন্যদের অনুমোদন এবং সম্মান অর্জন করার জন্য যথেষ্ট ভাল নই	এটা আপনার মনে হয় যে আপনি অন্যদের মধ্যে সম্মান এবং অনুমোদন অর্জন করতে অসামর্থ্য দেখাচ্ছেন। এটা আপনার ব্যক্তিগত মন্দ মন্ত্রনা কিংবা আত্মবিশ্বাসের ফল। এই ধারণাটা সহজভাষায় সরাসরি খোলাখুলি কোন কারণও হতে পারে না। এই ধরনের মনস্থিতির সফটওয়ারে পরামর্শ দেয়া কঠিন, কিন্তু যেকোন ব্যক্তি বা পর্বের সাথে দ্বিষকুশল সম্পর্কের জন্য চেষ্টা করতে পারেন। একটি চমৎকার উপায় হ'ল নিজের মনস্থিতি বিষয়ে দৃঢ়তার সাথে কাজ …
আমি ভবিষ্যত সম্পর্কে বিভ্রান্ত এবং অসহায় বোধ করি, কোন দিকে যেতে হবে তা আমি জানি না, এটি আমাকে খুব উদ্বিগ্ন এবং অস্থির করে তোলে	ভবিষ্যত সম্পর্কে অস্থির অনুভব করা একটি সাধারণ কার্য। তবে, আপনি একটি নির্দিষ্ট দিকে অগ্রসর হতে পারেন যদি আপনি কিছু সাহায্য পেতে চান। একটি ভবিষ্যদ্বাণী বা জ্যোতিষ কর্মী থেকে নির্দিষ্ট পরামর্শ পাওয়ার চেষ্টা করতে পারেন। তুমি যে সমস্যার সম্মুখীন হচ্ছো, তা সম্পর্কে বিশদ বিবেচনা করা যেতে পারে। এদের মধ্যে কোন একটি উপায় দিয়ে তোমাকে সহায়তা করতে পারি। আপনি আপনার অনুভব ও চাহিদা সম্পর্কিত বর্ণনা দিন।
আমি সবসময় ভয় পেতাম যে আমার কাজ এবং সিদ্ধান্তগুলি অন্যদের দ্বারা সমালোচিত এবং অস্বীকার করা হবে, যা আমাকে খুব অসুখী এবং হতাশ করে তোলে।	কথাটি বোঝার জন্য আমি খুব দুঃখিত এবং আপনার সাথে সমবেদনার জন্য ধন্যবাদ। তবে, ভয়ের মাধ্যমে অন্যদের মধ্যে আপনার পদার্থগামী কার্যের ক্ষেত্রে আপনার সিদ্ধান্তের ভেতরে নিজের আত্মবিশ্বাস থেকে ক্ষতি হচ্ছে। একটি গুরুত্বপূর্ণ কথা হলো অন্যের মতামত ও সমালোচনা সবসময় নিয়ে চিন্তিত হওয়া উচিত নয়। সময় নেন, নিজের মতামত ও সিদ্ধান্ত গঠনে যে প্রমাণ এবং স্বতত্ব আছে, সেগুলি নিশ্চিতভাবে আপনার কাছে থাকে এবং আপনি যথাযথ পদ…
আমি আত্মহত্যা করতে চাই কিন্তু আমি সাহস পাই না, আমি শুধু নিজেকে লুকিয়ে রাখতে চাই এবং আর কখনো বের হতে চাই না	আমি আপনার সমস্যার সাথে সহযোগিতা করতে পারবো। আপনার কথা শোনের জন্য আপনাকে ধন্যবাদ। আমি জানি যে নিজের সাথে সমস্যা থাকলে মনে হয় মূল্যবান সাহায্যের উপায় উপলভ্য নেই। কিন্তু আপনি নজর রাখতে পারেন যে আপনার চারপাশে সহযোগিতার জন্য অনেক মানুষ রয়েছে, যারা আপনার জন্য কথা শুনতে পারে এবং সাহায্য করতে পারে। আপনি যদি কেউকে আপনার সমস্যা বা মনের ভাব সম্পর্কে বলতে অক্সিজেন হেল্পলাইন বা স্থানীয় মানসিক স্বাস্থ্য অস…
আমার পরিবার প্রায়শই আমার সমালোচনা করে এবং আমাকে খুব আঘাত করে, আমি জানি না কীভাবে তাদের সাথে যোগাযোগ করতে হয়, তারা আমার থেকে অনেক দূরে চলে গেছে।	যদি আপনি আপনার পরিবারের সমালোচনা এবং আঘাতের বিষয়ে চিন্তিত থাকেন, তাহলে প্রথমেই সকলের সাথে যোগাযোগ করার পদ্ধতি নির্ধারণ করা উচিত। এখানে কিছু পদ্ধতি দেওয়া হলো: ১। সরাসরি কথা বলার মাধ্যমে যোগাযোগ করুন: আপনার পরিবারের সদস্যদের সাথে সারাদিনের চার্ট ফ্রীজে পোস্ট করে বা এইমেইল, টেক্সট মেসেজ বা সামাজিক যাত্রা-মাধ্যমে যোগাযোগ করুন। এইভাবে তাদের অবস্থান এবং মন্তব্যগুলি জানান। ২। সময় নিযুক্ত করুন: একটি স…
আমি ছোটখাটো বিষয়ে হতাশ হয়ে পড়তাম, সংবেদনশীল নিচু থেকে পুনরুদ্ধার করতে সমস্যায় পড়েছিলাম এবং মূল্যহীন বোধ করতাম।	সমস্যা থেকে উদ্ধার পাওয়া খুবই সাধারণ একটি অভিযান। আপনার মনোভাব এবং বর্তমান অবস্থা থেকে উপগ্রহ করে আরো দ্রুত পুনরুদ্ধারের উপায় নিচে দেওয়া হলো: 1. স্বয়ংসমর্থন উৎসাহিত করুন: আপনি নিজেকে একটি সম্পূর্ণ আত্মবিশ্বাসযোগ্য এবং শক্তিশালী ব্যক্তি মনে করুন। আপনি যখন নিজেকে উদাসীন মনে করছেন, তখন নিশ্চিতভাবে নিজের ভালো দিক এবং ক্ষমতা চিন্তাভাবনা করুন। 2. নির্দেশিকা তৈরি করুন: আপনার মূল লক্ষ্যগুলি নির্ধারণ …
আমি আমার সমবয়সীদের দ্বারা ধমক দিয়েছিলাম, যা দীর্ঘস্থায়ী নিম্ন আত্মসম্মান এবং প্রত্যাখ্যানের ভয়ের দিকে পরিচালিত করেছিল।	আপনার সমস্যা সম্পর্কে ব্যাপক বিশ্লেষণ করে আমি খুব খুশি যে আপনি এখানে এসে সাহায্য চাচ্ছেন। দ্বিধা থেকে বের হতে আপনার কাছে কিছু পদক্ষেপ নেওয়ার কিছু পরামর্শ আছে: 1. ধ্যান দিন যে আপনি ধ্বংস দেওয়ার বা কারও বিরুদ্ধে ধৌত দেওয়ার জন্য দায়ী নন, মান তথ্যগুলি মাথায় রাখুন। আপনার মনোয়াড়া সতিকার ও বিশ্বাসযোগ্য উদ্বৃত্তির দিকে চলছে তা ধরে নিন। 2. যদি আপনার ধৌত দেওয়ার পরামর্শের বা নিজের অতীতের কারণে ধ্বংস…
ইদানিং, আমি সবসময় অনুভব করি যে আমার মেজাজ অনেক ওঠানামা করে। মাঝে মাঝে আমি খুশি থাকি, কিন্তু মাঝে মাঝে আমি বিনা কারণে বিষণ্ণ থাকি। এটা আমাকে খুব কষ্ট দেয়। আমি বিষণ্ণতায় ভুগছি কিনা জানি না।	দুঃখিত হয়েছি আপনার এই অবস্থার জন্য। মানসিক স্বাস্থ্য সামগ্রিক ভাবে গভীর বিষণ্ণতা সেশ করতে পারে, যা সাধারণত সামগ্রিক জীবনের বিভিন্ন পরিস্থিতিতে সংঘাতিত থাকতে পারে। আপনার মেজাজের পরিবর্তনের সময়ে কিছুটা অনিবার্য হতে পারে, কিন্তু আপনি এই সময়ে নিজের মনের পরিবর্তনের জন্য কিছু করতে পারেন। একটি কাজে ব্যস্ত থাকলেও নিয়মিত বিশ্রাম নিন। পর্যাপ্ত ঘোম নিশ্চিত করুন এবং প্রতিদিনের জন্য একটি শক্তিশালী শপ্ন ইত…
আমি খুব চাপে ছিলাম, আমার মনে হয়েছিল যে আমি অভিভূত হয়ে যাচ্ছি, আমি প্রায়ই ফ্লাস্টার বা শ্বাসকষ্ট অনুভব করতাম।	এটা মনে করা একটা স্বাভাবিক পর্যায়। চাপ আর হাওয়াতে অতিরিক্ত অভিভূত হয়ে যাওয়া একটা মানসিক চিন্তার সাথে সম্পর্কিত হতে পারে। সাময়িক স্ট্রেস বা টেনশনের জন্যে, দিনভরে অপ্রয়োজনীয় চিন্তা থাকা, সমস্যার দিকে মনঃপূর্বক উদ্বিগ্ন থাকা সহ আরও কয়েকটি কারণ থাকতে পারে। আপনি চাপ কমাতে পারেন এবং ভাল ব্যাস্ত পরিবেশ প্রদান করতে পারেন। নিম্নলিখিত কিছু প্রথম পাশাপাশি নিয়মিত অনুপ্রাণিত দীর্ঘমধ্যে শ্বাস নিতে ধ্য…
আমি প্রায়শই উদ্বেগ এবং ভয়ের অনুভূতি অনুভব করি, এটি কোথা থেকে আসছে তা জানি না এবং কখনও কখনও শ্বাস নিতেও অসুবিধা হয়।	উদ্বেগ এবং ভয়ের অনুভূতি একটি সাধারণ মানসিক অবস্থা হতে পারে যা বিভিন্ন কারণে উত্পন্ন হতে পারে। উদ্বেগ ও ভয়ের জন্য প্রাথমিক কারণগুলির মধ্যে অন্ধকারে থাকা, অনিয়মিত জীবনযাপন, সামাজিক প্রতিঅপত্তি, মনোব্যাধি এবং স্বাস্থ্যসম্পর্কিত সমস্যা সম্পর্কিত অবস্থা এর মধ্যে অন্যান্য সমস্যা রয়েছে। শ্বাস নিতে সমস্যা অনুভব করার জন্যের কারণ হতে পারে অস্বাস্থ্যকর বা দুর্বল শ্বাসকেন্দ্র, রাগান্বিত শ্বাস, সমাজে সামা…
আমি সবসময় অনুভব করেছি যে আমি মূল্যহীন, যথেষ্ট ভাল নই, যথেষ্ট স্মার্ট নই এবং যথেষ্ট সুন্দর নই, যা আমাকে বিষণ্ণ করে তোলে।	আপনার বিবরণে আপনি নিজেকে নির্ণয় করেছেন যে আপনি যথেষ্ট মূল্যহীন, যথেষ্ট ভাল নয় এবং যথেষ্ট স্মার্ট নয়। কিন্তু অবশ্যই মনে রাখবেন যে আপনার নিজের মতামত সম্পর্কে আপনার ধারণা ত্তংগত। হৃদয়স্পন্দন করে বলতে পারি যে আপনার মতে অপেক্ষাকৃত মূল্যহীন ও যথেষ্ট সুন্দর আপনাকে নিরতিশয় আমন্ত্রণ করে তোলে। প্রতিটি ব্যক্তি একটি অনন্য ভাবে যুক্তিসম্পন্ন ও মানসিকতার বোধ রয়েছে। বিভিন্ন প্রকাশ রূপগুলি আপনার নকচকে থাকা…
আমার সবসময় আত্মহত্যার চিন্তাভাবনা থাকে, আমি অনুভব করি জীবন অর্থহীন এবং আমার কোন মূল্য নেই। আমিও হতাশ বোধ করি এবং মনে করি আমার ভবিষ্যতের জন্য কোন আশা নেই	আমি হৃদয়ে ব্যথাও করছি যে আপনি এই মুহূর্তে আত্মহত্যার চিন্তাভাবনা করছেন। এমনকি জীবনের মূল্যও মনে করছেন না। তবে, আমি আপনাকে বলতে চাই যে আপনার চিন্তা এবং ভাবনা পরিবর্তন পাবার সুযোগ আছে এবং আপনার প্রাকৃতিক তালাশ থাকলেও আপনি মানুষ হিসেবে মূল্যবান। আপনি একজন শক্তিশালী ও সামরিক পারস্পরিক সম্পর্কের জন্যেও অকার্যকর করতে পারেন। আপনি আত্মহত্যা পরিকল্পনা করছেন তাই আপনার জীবনে ব্যক্তিগত ও দরিদ্র কারণে বিপর্য…
আমি প্রায়শই মনে করি আমার জীবন অর্থহীন, আমি জানি না কেন আমি এইভাবে বেঁচে আছি, আমার মনে হয় আমার কোন উদ্দেশ্য নেই, কোন প্রেরণা নেই, মনে হচ্ছে আমি আমার সময় নষ্ট করছি, নিজেকে মূল্যহীন মনে হচ্ছে	দুঃখিত জানাতে কারো ভালোবাসার অন্তর্জালে নেই বলে হয় না। আমরা সবাই সময়ের মধ্যে এমন অনুভব করতে পারি। কিন্তু এইভাবে মনে হওয়াটা সাধারণতঃ আমরা সাধারণ মানুষের কাছে অন্যতম শক্তিশালী অনুভব নয় কিন্তু এর বিপরীতেই এইটা আপনার ব্যক্তিগত দক্ষতার সঙ্গে সম্পর্কিত হতে পারে। আপনার মনে হয় আপনি নিজেকে মূল্যহীন মনে করছেন, হয়তো আপনার জীবনে পুরস্কার এবং তথ্যাগত সংগ্রহের অভাব আছে যা আপনাকে উপগ্রহ জীবনের উদ্দেশ্য এবং…
আমি ইদানীং অনেক চাপ অনুভব করছি, কারণ আমি প্রচুর কাজ করি, এবং আমাকে প্রতিদিন অনেক কাজ করতে হয়, কিন্তু আমার অর্জনের অনুভূতি নেই, যা আমাকে খুব হতাশ করে তোলে, আমি কীভাবে এই মানসিক চাপের সাথে মোকাবিলা করব?	আপনার মানসিক চাপ এর সাথে মোকাবিলা করা খুবই গুরুত্বপূর্ণ। একটি সক্ষম মানসিক স্বাস্থ্য রক্ষার জন্য নিম্নলিখিত কিছু করণীয় আপনার সাহায্য করতে পারে: 1. সঠিক ক্রমে বিশ্রাম নিন: নির্ধারিত সময়ে প্রতিদিন যথাযথ বিশ্রাম নিন। এটি আপনাকে শারীরিক এবং মানসিক চাপ কমানোর সাহায্য করবে। 2. প্রতিদিন পর্যবেক্ষণ ও ব্যায়াম করুন: নিয়মিতভাবে যোগাযোগ সাধারের সাথে ব্যায়াম করুন। এটি মনোভাব উন্নয়ন করে এবং চাপ কমাতে সাহ…
আমি প্রায়শই উদ্বিগ্ন এবং নার্ভাস বোধ করি এবং জীবনের চাপ এবং চ্যালেঞ্জগুলি মোকাবেলা করতে অক্ষম বোধ করি।	বোধকরুত এই সমস্যা সাধারণত মানসিক ও শারীরিক চাপের কারণে হয়। কিছু চর্যাপ্রণালী আপনাকে উদ্বিগ্ন ও নার্ভাস হওয়ার কথায় সহায়তা করতে পারে। ১. নিয়মিত যোগাযোগ ও স্বাস্থ্যকর জীবনযাপন: সময় নির্ধারণ করে স্বাস্থ্যকর খাদ্য সেবন করুন, যোগাযোগে বন্ধুগণ এবং পরিবার সদস্যদের সংস্পর্শ করুন, নিয়মিত শ্রম এবং বিশ্রাম গ্রহণ করুন। এছাড়াও, ধ্যান দিয়ে রাখুন যে আপনার বাড়ছেই না যে মন এবং শারীরিক চাপও ভূলে যায়। ২. …
আমার মন নেতিবাচকতা এবং আত্ম-সন্দেহে ভরা এবং আমি জানি না কিভাবে এটি থেকে বেরিয়ে আসা যায়	নিঃস্বার্থ সেবা, সুসময়ের জন্য ধৈর্য এবং আশ্বাস প্রয়োজন এমন সমস্যা সমাধানে আদর্শ। যে কোনও সমস্যা সমাধানের জন্য নিম্নোক্ত চারটি কথা মনে রাখতে পারেন: 1. আত্মসম্মান উন্নতি: আপনার নিজের সাথে মেধা, কাজের সাথে নম্রতা এবং উদারতা দ্বারা আত্মসম্মান উন্নতি করুন। নিজেকে নিজের সঙ্গে তুলনা করার কথা পর্যই থেকে যে মন নেতিবাচকতা ও আত্মসম্মানের অনাশ্বাস শুরু হয়। 2. আত্মচিন্তা ও ম্যানেজমেন্ট: আমাদের মধ্যের অনেকে…
আমি অনুভব করি যে আমার আবেগ আরও বেশি অস্থির হয়ে উঠছে। মাঝে মাঝে আমি বিষণ্ণ বোধ করি, আবার কখনও আমি আবার আবেগপ্রবণ বোধ করি। আমি জানি না আমার মনের মধ্যে কিছু ভুল আছে কিনা।	আপনার বর্ণনা মেধার থেকে আমি মনে করছি যে আপনি মানসিক স্থিতিপ্রবণতা সম্পর্কে কিছু সন্দেহ রাখছেন। সাধারণত, মনের মাঝে বিভিন্ন কারণে আবেগ ও বিষণ্ণতা উত্পন্ন হয়। সবার প্রথমে, আপনার মেধার থেকে অস্থিরতার শারীরিক কারণগুলি বিবেচনা করা উচিত। পরবর্তীতে, আপনার মানসিক স্বাস্থ্য ও জীবনের সামগ্রিক পরিস্থিতিও মাধ্যমেই অস্থিরতা এসে যতবার আবেগ ও বিষণ্ণতা উত্পন্ন হয় তা নিশ্চিত করা যাবে। এছাড়াও, অনেকসময় মনের মাঝে…
বাচ্চারা স্কুল ছেড়ে বাড়ি চলে যায়, বাড়িতে ঠান্ডা থাকে, কখনও তার সদিচ্ছাকে গ্রহণ করে না, কেবল সে ভুল করেছে, হৃদয় খালি, ভয় হল, যখন তারা বড় হবে, তখনও বাবা-মায়ের মতো হবে না।	চিন্তা করবেন না। শিশুদের মানসিক স্বাস্থ্য ভবিষ্যতে উন্নতির মাধ্যমে পরিবারের স্থিতিতে অবদান রাখতে পারে। নিয়মিত সামাজিক পরিকল্পনা, মানসিক আশ্রয় এবং মনোযোগ প্রদান করা সুস্থ মানসিক অবস্থা বজায় রাখতে সাহায্য করবে। সাধারনত, শিশুদের নিজের চিন্তা এবং ভাবনা প্রকাশ করতে অনুমতি দিয়ে সামগ্রিক উন্নতি করা যেতে পারে। তারা সময় পেতে এবং তাদের মনোযোগ এবং চিন্তা পরিবর্তিত করতে সাহায্য করার জন্য সাথে থাকলে তারা…
তিনি প্রায় প্রতি রাতে ঘুমাতে পারেন না, ঘুমাতে পারেন না এবং ঘুমিয়ে পড়তে পারেন না, তার মেজাজ খারাপ থেকে খারাপ হচ্ছে, এবং তিনি উদ্বিগ্ন যে তার বিষণ্নতা বা অন্যান্য গুরুতর মানসিক সমস্যা হবে কিনা।	এটি খুব দুঃখজনক যে আপনি এতদিন ঘুমতে পারছেন না এবং এটির ফলে আপনার মানসিক ও শারীরিক স্বাস্থ্যের ক্ষেত্রে সমস্যার তীর্থ সৃষ্টি হচ্ছে। গুরুতর না হয় আপনি কিছু পরিবর্তন করতে পারেনে কিছু পরামর্শ মানে বানান টিমি উল্লসিত। একটি ভাল ঘুমের জন্য আপনি নিম্নলিখিত কিছু টিপস অনুসরণ করতে পারেনঃ 1. নিয়মিত গতিময় দিনচারণা পালন করুন। সকালে উঠে যাওয়া, নির্দিষ্ট সময়ে খাওয়া, প্রতিবেশীর সঙ্গে সময় কাটানো - সবজি তালি…
সম্প্রতি, আমি সবসময় অনুভব করি যে আমি দুর্বল, এবং আমার চিন্তাগুলি দড়ির জগাখিচুড়ির মতো, ধরতে অক্ষম	আপনি যেহেতু চিন্তাগুলি দড়ির জগাখিচুড়ির মতো ধরতে অক্ষম মনে করেন, তাহলে কিছু পদক্ষেপ নেওয়া যেতে পারে। আপনার মানসিক অবস্থা সম্পর্কে পরামর্শ দেওয়ার জন্য একজন মনোযোগপ্রদানকারী বা পরামর্শকারীর সঙ্গে কথা বলা উচিত হতে পারে। তারা আপনাকে সঠিক পরামর্শ এবং সমর্থন প্রদান করতে সহায়তা করতে পারেন। এছাড়াও, নিম্নলিখিত কিছু অনুশীলন উপযুক্ত হতে পারে: 1. বিনোদন: আপনার মুহূর্তের কিছু সময় হাসির জন্য চেষ্টা করুন।…
যতবারই আমি আমার ব্যর্থতার কথা ভাবি, আমি অসহায় বোধ করি, সমাজের দ্বারা গৃহীত না হওয়ার চিন্তায় আমি আমার সাহস হারিয়ে ফেলি, আমি আমার স্বপ্ন পূরণ করতে পারব না এই ভেবে আমি অসহায় বোধ করি।	আপনি অসহায় বোধ করতে পারেন, কিন্তু মনে রাখবেন যে এই ভাবনাটি বা মন্তব্যটি সত্য নয়। সকলের জীবনে যখন ব্যর্থতা ঘটে, সেই সময় আপনাকে নিজেকে আশা থেকে পুনরুদ্ধার করার জন্য নতুন উপায় খুঁজে বের করা দরকার। সমাজ নয়, শুধুমাত্র আপনার সমর্থক ও আশ্রয়দাতারা চাইবেন নাকি আপনি সাফল্যের দিকে এগিয়ে যান। আপনি আরো বিশ্বাস করতে পারেন যে আপনি নিজের স্বপ্ন পূরণ করতে সম্পূর্ণরূপে সক্ষম। আপনাকে সাহায্য করার জন্য কখনই এ…
আমার সম্পর্ক সবসময়ই অস্থির থাকে এবং আমি প্রায়ই আবেগগত সমস্যার সম্মুখীন হই, আবেগগত সমস্যাগুলি কীভাবে মোকাবিলা করতে হয় তা না জেনে, যা আমাকে অসহায় এবং হারিয়ে যেতে বাধ্য করে।	আপনার ব্যক্তিগত সমস্যার সাথে পরিচিত হতে আমি পাশাপাশি রয়েছি। আপনাকে সাহায্য করতে ব্যবস্থা করতে পারি। আবেগগত সমস্যার সম্মুখীন হওয়ার দিকে কিছু ম্যানেজমেন্ট সূত্র এবং প্রায়োগিক পদক্ষেপ আছে, নীচে কিছু উপায় সাজানো হলো: 1. শ্বাসপ্রশ্বাসের দিকে মনোরম দিন বিতাড়িত করুন: দৈনন্দিন জীবনে স্বস্তি ও আনন্দের কাছে নিরামিষ ও যোগাযোগযোগ্য সুস্বাদু ভোজন প্রয়োগ করা যেতে পারে। এরাউটিন ম্যানেজমেন্ট, ধ্যান প্রয়োগ…
কখনও কখনও আমি নিয়ন্ত্রণ হারিয়ে ফেলি, খুব বিরক্ত এবং রেগে যাই এবং এমনকি আমার চারপাশের লোকদের উপর রেগে যাই।	আমি বুঝতে পারি যে নিজের কন্ট্রোল হারানো আর অনিয়ন্ত্রিত অনুভব খুব কষ্টকর। মনে রাখবেন, এই ধরনের অবস্থা সাধারণ এবং ব্যক্তিগত অভিজ্ঞতার একটি অংশ। তাপমাত্রার ইতিমধ্যে প্রতিক্রিয়া চাইলে আপনি নিম্নলিখিত কিছু টিপস মেনে চলতে পারেন: ১. সাধারণ বিনোদন এবং স্বাস্থ সম্পর্কিত কাজের পরিধি বিস্তার দিন। দৈনিক ব্যায়াম, মেডিটেশন, যৌগিক কাজে যোগ দিন। এটি আপনার মানসিক এবং শারীরিক সুস্থতা বৃদ্ধির সাথে সাথে মহামারী-স…
আমার কাজ চাপযুক্ত এবং প্রতিদিন সমস্যা ও চ্যালেঞ্জ মোকাবেলা করা আমাকে খুব উদ্বিগ্ন করে তোলে, আমি ঘুম হারাতে শুরু করি, আমার ক্ষুধা হারাতে শুরু করি এবং কখনও কখনও নিয়ন্ত্রণের বাইরে বোধ করি	এই সমস্যাগুলি সমাধান করার জন্য আপনি কিছু প্রয়োজনীয় পদক্ষেপ নিতে পারেন। নিম্নলিখিত কিছু উপায় আপনার প্রতিবেশীকে সামগ্রিকভাবে সমস্যা সমাধানে সহায়তা করতে পারে: 1. প্রতিদিনের জীবনযাপন যোগ্যতা বজায় রাখুন: প্রতিদিন যথাযথ পরিমাণে ঘুমানো, বিয়াপারিক এবং সামাজিক সময় কর্তিতে সময় ব্যয় করা, সঠিক খাদ্য ও পর্যাপ্ত পানীয় গ্রহণ করা ইত্যাদি নিশ্চিত করুন। 2. স্বাস্থ্যকর জীবনযাপন আচরণ: আপনার কাজের জন্য যোগ্…
আমি সবসময় আমার আবেগ নিয়ন্ত্রণ করতে পারি না, কখনও কখনও আমি হঠাৎ রেগে যাই, এবং কখনও কখনও আমি হঠাৎ নিঃশব্দ হয়ে যাই, নিজেকে আমার আচরণ এবং কর্মক্ষমতা পূর্বাভাস করতে অক্ষম করে তোলে, এবং আমি খুব অস্বস্তি এবং বিভ্রান্ত বোধ করি	এমন অবস্থায় আপনার সাথে কাজ করতে আমি প্রস্তাব দেওয়ার চেষ্টা করব। নিচে কিছু পরামর্শ দেয়া হলো: 1. মেধাঙ্গ প্রশিক্ষণ: মেধাঙ্গ সাধনা ও মেডিটেশন দ্বারা আপনি আবেগ নিয়ন্ত্রণ করার ক্ষমতা বৃদ্ধি করতে পারেন। প্রতিদিন কিছু মিনিট মেধাঙ্গ সাধনা করুন যাতে মনকে শান্তি এবং স্থিরতা অনুভব করে। 2. শ্বাসায়াম সাধনা: দীর্ঘ ভাবে শ্বাসায়ামের মাধ্যমে আপনার তন্দ্রা এবং বিভ্রান্তিতা কমাতে পারেন। মনে রাখবেন, নিজেকে স্থ…
আমি অতীতের অপ্রীতিকর অভিজ্ঞতার জট থেকে মুক্তি পেতে পারি না এবং যখনই আমি সেই ঘটনাগুলির কথা ভাবি, আমি অসহ্য যন্ত্রণা এবং ক্ষতি অনুভব করি।	আমি বুঝতে পারি যে অতীতের অপ্রীতিকর অভিজ্ঞতা থেকে মুক্তি পেতে ব্যবহারকারীরা দীর্ঘদিন ধরে সংশোধিত হতে চান। সন্তুষ্ট হবার একটি উপায় হতে পারে সেই ঘটনাগুলি জিনিসটি পরিবর্তন করা সম্ভব না। তবে, একটি কাজকর্ম হতে পারে সেই ঘটনাগুলির মাধ্যমে কী শিখেছেন এবং তা ব্যবহার করে ভবিষ্যতে সুধারের চেষ্টা করা। নিম্নলিখিত কিছু পদক্ষেপ আপনার সহায়তা করতে পারে: ১. স্বার্থপরিহিতকর বিচার বদলুন: বুঝতে পারেন যে আপনি এই অভিজ…
আমি প্রায়শই নিঃসঙ্গ এবং অসহায় বোধ করি, কেউ আমার অভ্যন্তরীণ জগতের সাথে কথা বলতে পারে না, আমি বিশ্বের দ্বারা পরিত্যক্ত বোধ করি, যা আমাকে খুব বেদনাদায়ক এবং মরিয়া করে তোলে।	আমার মূল উদ্দেশ্য আপনাকে সহায়তা করা। আপনি নিঃসঙ্গে এবং অসহায় বোধ করলে মানসিক স্বাস্থ্য পরেন নিগরানী করা উচিত। নিজের সাথে যোগাযোগ করা, আপনার পরিবেশের মানসিক সমর্থন অনুশীলন করা এবং কাউকে আপনার স্থিতিতে সাহায্য চাওয়া সহায়ক হতে পারে। আপনার অন্যের সঙ্গে সময় কাটানো, আপনার আঘাতক অনুভব করার জন্য একজন আপনার ভাল বন্ধু বা পরিবারের সদস্য সন্ধান করা ইত্যাদি একাধিক পদক্ষেপ নেওয়া উচিত। আপনার মানসিক স্বাস…
আমি প্রায়ই আমার ত্রুটিগুলির কারণে নিকৃষ্ট এবং অসহায় বোধ করি, অনুভব করি যে আমি যথেষ্ট ভাল নই, ভালবাসার যোগ্য নই	আপনার সঙ্গে এই ভাবনাটি বুঝার জন্য আমি সময় নিতে চাই। কখনো কোনও অনুমান নিতে ঘাসফুস করে ভালোবাসার প্রমাণ বা নিজের মান্যতা নির্ধারণ করার জন্য কোনও ভাষা নয়। আপনি অন্যদের চেয়ে য়েন ভালো হতে পারেন অথচ নিজের সাথে যথেষ্ট মিল রয়েছে। সাধারণত সবার মধ্যেই ত্রুটিগুলি রয়েছে এবং আপনি সাধারণ একটি ব্যক্তি। আপনি স্বাভাবিক ভাবে ভুল করতে পারেন এবং এগুলি কোনও উত্কর্ষধারণা করে নেয়া নেই যে আপনাকে অসমর্থ করে দেয়। এ…
আমার অনেক কাজ এবং অধ্যয়নের চাপ আছে, এবং আমি প্রায়ই ক্লান্ত বোধ করি, কিন্তু আমি জানি না কীভাবে শিথিল করা যায় এবং চাপ থেকে মুক্তি দেওয়া যায়।	চিন্তা করে দেখা যাক, সেবা করার ঠিকানা কি নেই?
আমার মেজাজ এত দ্রুত বদলে যায়, খুশি থেকে দুঃখে কিছুক্ষণ লাগে, এমন কেন?	মেজাজের তারতম্য বিভিন্ন কারণের ফলে হতে পারে যেমন: সামগ্রিক স্বাস্থ্যসম্মত না থাকা, মানসিক চাপকে প্রতিপত্তির অভাব, কি খেয়েছেন বা কি খেতে চান তা পূরণ হয়নি, নির্ধারিত নিয়মিত ঘুম পাচঁদা, ভারী কাজের প্রেমপত্র, পরিবারের সমস্যা, সামাজিক প্রতিষ্ঠান বা সামাজিক যোগাযোগের সমস্যা ইত্যাদি। কোনও নির্দিষ্ট কারণের অনুযায়ী মেজাজের পরিবর্তন হয়েছে কি না নিশ্চিত করার জন্যে বেশ কিছু সময় এই সমস্যার মূল কারণটি বি…
অন্য যে কারও তুলনায় আমার ধৈর্য হারানোর সম্ভাবনা বেশি, এবং এর কিছুটা মনে হয় যেন এটি বৃথা দমন করা হয়েছে, সীমার দিকে ঠেলে দেওয়া হয়েছে।	ধৈর্য হারানো সম্ভাবনা বেশি হওয়া দিয়ে হয়তো আপনি অন্যের সাথে তুলনা করতে পারেন। কিন্তু অবশ্যই সেটি বৃথা দমন করা যেন হয়েছে না সেটি দিকটি বিবেচনা করা দরকার। সাধারণত, ধৈর্যশীলতা একটি গুরুত্বপূর্ণ কৌশল হয় যা অভিজ্ঞতা ও অনুভবের সাথে বিক্রিয়া করতে হয়। প্রয়োজনে আপনি ধৈর্য উন্নত করার জন্য নিম্নলিখিত কিছুটি গুরুত্বপূর্ণ কার্যক্রম অনুসরণ করতে পারেন: 1. মেধার বর্ধন সম্পন্ন করুন: ধৈর্য উন্নত করার জন্য ম…
যতবারই আমি ডাক্তারের কাছে যাওয়ার বা একজন থেরাপিস্টের সাথে দেখা করার কথা ভাবি, আমি ভয় পাই এবং নিরাপত্তাহীন বোধ করি। আমি চিন্তা করি যে আমার সমস্যাগুলি অন্যদের দ্বারা প্রকাশ করা হবে এবং বিচার করা হবে। এই ভয় আমাকে সাহায্য চাইতে বাধা দেয়।	আপনার ভয় ও নিরাপত্তাহীন বোধটি স্বাভাবিক হতে পারে, কিন্তু নিরাপত্তা ও সময়ের সাথে আপনার জন্য উচিত আছে যেকোনো ধরণের খবর যোগাযোগ এবং এগিয়ে যাবার জন্য ডাক্তার বা থেরাপিস্টের সাথে দেখা করা। এই প্রক্রিয়াটি আপনাকে স্বাস্থ্যসেবা এবং আরাম পাওয়ার জন্য সঠিক মাধ্যম হিসাবে কাম করতে পারে। আপনি সমস্যাগুলি একা নিয়ে যেতে পারেন। কিন্তু একজন বোধশত করে থাকা মানসিক স্বাস্থ্যের কেন্দ্রিক ক্ষেত্রে একটি পেশাদার সাথ…
আমি আমার কর্মক্ষেত্রে অনেক হতাশা এবং অবিচারের মুখোমুখি হয়েছিলাম, যা আমাকে আমার জীবনে এত হতাশ এবং আশাহীন করে তুলেছিল।	কাজের জন্য হতাশ ও আশাহীনতা অনুভব করা সাধার্মিক হতে পারে, তবে আপনাকে মনগতভাবে সুস্থ রাখতে ও আপনার সাফল্যে সহায়তা করতে একটি কয়েকটি পরামর্শ দিতে চাইবো। ১. নিশ্চিত হন আপনি সঠিক করণীয়ে প্রয়াস করেছেন। ধ্যান দিন আপনি নিজের কাজের জন্য যত্ন সম্ভবমত চেষ্টা করেছেন কিংবা না। সামর্থের বাইরের কিসিমে হতাশা ও আশাহীনতা আজ্ঞেয় হয়ে উঠতে পারে। ২. আপনার কাজের সাপ্তাহিক সংবাদপত্র বর্তমানের সাপ্তাহিক পর্যালোচনায়…
আমার সহপাঠীদের দ্বারা আমি বৈষম্যের শিকার হয়েছিলাম এবং মাঝে মাঝে আমি অনুভব করি যে জীবন অর্থহীন	আপনি বৈষম্যের শিকার হয়েছিলেন এবং জীবনে অর্থের অভাবের বা অস্বাভাবিকতার অনুভব করছেন। এই ধরনের সমস্যার সঙ্গে সম্পর্কিত সাইকোলজিকাল সহায়তা প্রদানে একজন সামর্থ্যপূর্ণ মনোবিজ্ঞানীর সাহায্য ব্যবহার করা যেতে পারে। তবে, আপনি প্রাথমিক স্তরে অনিচ্ছাকৃত কিছু করার চেষ্টা করতে পারেন: 1. নিজের সাথে কথা বলুন: আপনি নিজের সাথে কথা বলার উপকারিতা গুলো সম্পর্কে মনে করুন। আপনার কি উপকারিতা হতে পারে এবং আপনি কিভাবে চ…
আমি আমার শরীর এবং চেহারা নিয়ে খুব অসন্তুষ্ট, এবং আমি সবসময় নিজেকে অত্যধিক সমালোচনা করি এবং অস্বীকার করি, যা এমনকি আমার দৈনন্দিন জীবন এবং সামাজিক কার্যকলাপকে প্রভাবিত করে	আপনার সতর্কতা বুঝতে দিয়ে আপনার দুর্ভাগ্যপূর্ণ দশা কেন আপনি স্বাভাবিক থেকেই অধিক সমালোচনা করেন। স্বাস্থ্য এবং সৌন্দর্য সম্পর্কিত সমস্যার সমাধানে কিছু তথ্য এবং নির্দেশনা দেওয়া যায়। 1. স্বাস্থ্যকর খাবার: আপনার শরীরের সুস্থ্যকর ফাঁকসগুলি পূরণ করতে অস্থির কোনো প্রয়োজন নেই। প্রতিদিনের আহারে পর্যাপ্ত পরিমাণে শাকসবজি, ফল, প্রোটিন এবং ফাইবার রয়েছে কিনা তা নিশ্চিত করুন। এছাড়াও, পর্যাপ্ত পানি, নিয়মিত…
সম্প্রতি আমি প্রায়ই ক্লান্ত এবং দুর্বল বোধ করি, এমনকি সিঁড়ি বেয়ে ওঠা ক্লান্তিকর, আমি কি একজন ডাক্তার দেখাতে পারি	আপনি যদি নিজেকে অস্বাস্থ্য বোধ করেন বা দুর্বল হয়ে থাকেন, তবে সবচেয়ে শ্রেষ্ঠ ধারণা হয়ে থাকবে একজন ডাক্তারের সাথে কথা বলা। একজন ডাক্তার আপনার অবস্থা পরীক্ষা করতে পারবেন এবং যথাযথ চিকিত্সা প্রদান করতে পারেন। তারা আপনার জীবনযাপনের সাধারণ পরামর্শ দিতে পারেন এবং আপনাকে পরিচিত অসুখের ক্ষেত্রে আপনাকে সঠিক চিকিত্সা পরামর্শ দিতে পারেন। অতিরিক্তভাবে, পরিবর্তনশীল জীবনযাপন স্যুটি সাহায্য করতে পারে, যা আপনা…
আমি মনে করি আমি আমার আবেগ এবং আচরণ নিয়ন্ত্রণ করতে পারি না এবং প্রায়ই আবেগপূর্ণ সিদ্ধান্ত নিতে পারি, এটি কি একটি মানসিক রোগ? কিভাবে এটি চিকিত্সা?	আপনার গবেষণা থেকে প্রায়শই আবেগপূর্ণ সিদ্ধান্ত নেওয়া একটি মূল্যায়ন হতে পারে, কিন্তু এটি মানসিক রোগ নয়। এটি আবেগমুক্ত হতে সাহায্য প্রয়োজন হতে পারে। আবেগ নিয়ন্ত্রণ ও আচরণ নিয়ন্ত্রণ সংশ্লেষণ ও সম্প্রচারের ওপর নির্ভর করতে পারে। মানসিক স্বাস্থ্যের সমস্যা, স্ট্রেস, বা অতিরিক্ত মানসিক চাপ আদি সাধারণত এই সমস্যা গুলিকে উত্পাদিত করতে পারে। চিকিত্সা প্রাপ্ত করার একটি ভাল পদ্ধতি হলো একজন মনোযোগ চিকিত্স…
আমার হৃদয়ের তলদেশে সমস্ত নেতিবাচক আবেগ দমন করুন, নিজেকে একটু দুর্বল হতে দেবেন না, কিন্তু আমি নিজেকে সংযত করতে পারি না	আমি সমস্যাগুলি সমাধানে সহায়তা করতে পারি। আপনার হৃদয়ের তলদেশে নেতিবাচক আবেগ দমনে কিছু টিপস ফলো করা যাবে: 1. প্রায়শই স্বাস্থ্যকর করে বন্ধুদের সঙ্গে সময় কাটান। যোগাযোগ ও সামাজিক সম্পর্কগুলি মনোনিয়ন্ত্রক হিসেবে কাজ করতে পারে এবং পরিবারের সমর্থন ও সহায়তা অনেকটাই মানসিক স্থৈর্য জনিত করতে পারে। 2. ধারণা করুন যে, আপনি মনোযোগ দেওয়ার মাধ্যমে স্বাস্থ্যকর জীবনযাপন করতে পারেন। ধ্যান, মেডিটেশন, যোগাসন ব…
আমরা সব সময় লড়াই করেছি এবং প্রতিবার আমাদের কিছু বেদনাদায়ক শব্দ ছিল এবং আমরা ভেঙে পড়ি	লড়াই একটি সাধারণ বিষয় হলেও এর দ্বারা আমরা কিছু গর্ব অনুভব করতে পারি। তবে, লড়াইয়ের ফলে অস্থিরতা এবং ভেঙে যাওয়া সাধারণত অনিহার্য মনে হয়ে থাকে। যেকোনো সুযোগে আমরা শুধুমাত্র আপাতত হবের চেষ্টা করতে পারি, পরের সময়ে আমরা ব্যাবধানগুলি সমাধান করার জন্য পর্যাপ্ত পরিস্কারতা বিবেচনা করতে পারি। নিম্নে কিছু পরামর্শ দেওয়া হলো: 1. বিষয়টির দৃষ্টিতে নিজের ব্যক্তিগত ক্ষমতাসীমা পর্যালোচনা করুন। অন্যের সঙ্গে…
রাস্তায় হাঁটতে হাঁটতে, জিয়াও ঝাং সবসময় অনুভব করত যে তার চারপাশের লোকেরা তার দিকে উঁকি মারছে এবং তার মানসিক অবস্থা আরও বেশি অস্থির হয়ে উঠছে।	জিয়াওর জন্য তার চারপাশের লোকের উঁকি মারা একটি সমস্যা হতে পারে যা তার মানসিক অবস্থার উপর প্রভাব ফেলতে পারে। এই ধরনের অবস্থা অত্যন্ত অস্থিরতা এবং সহজেই চিন্তা ও চেষ্টা নিয়ে এগিয়ে যেতে পারে। আপনি জিয়াওর জন্য কিছু পরামর্শ দিতে পারেন: 1. স্বাস্থ্য ও বিচরণ: স্বাস্থ্যকে পরিশ্রম করুন এবং অনির্দিষ্ট সময়ে তারা থেকে দূরে চলে যান। প্রতিদিন বিদ্যুত্তয়া চাপ এবং একটি স্থাপত্যশিল্পের সাথে জড়িত কাজ এলাকা চ…
আমি অনুভব করি যে আমার আন্তঃব্যক্তিক সম্পর্কের মধ্যে একটি সমস্যা রয়েছে। বন্ধু, পরিবারের সদস্য এবং সহকর্মীদের সাথে যোগাযোগ করা এবং যোগাযোগ করা কঠিন। কখনও কখনও এমনকি দ্বন্দ্ব এবং ঝগড়াও হয়। এটি আমাকে খুব হতাশ এবং অসহায় বোধ করে। আমি জানি না কিভাবে সুস্থ সম্পর্ক গড়ে তুলতে হয়	আপনার জন্য একটি সুস্থ সম্পর্ক গড়ে তুলতে আমি কিছু পরামর্শ দিতে পারি। 1. আমার বলবো যে সুস্থ সম্পর্কের জন্য সার্বিকভাবে যোগাযোগ এবং সচ্ছলতা অনুসরণ করা উচিত। যদি আপনি ভালোভাবে আপনার মনের ভাবনা অপসারণ করতে পারেন না, তবে অন্যদেরকে আপনার প্রতিভা জানান এবং তাদের সাথে অপরিসীমার মতো ভাবে কথা বলুন। 2. যোগাযোগে সুস্থ হওয়ার জন্য আমি পরামর্শ দিতে পারি যে আপনি অপরকে মানবেন। হঠাত মন্দ সম্পর্কের কারণে আপনি যে ভ…
আমি কেমন দেখতে এবং আমার শরীর নিয়ে অসন্তুষ্ট ছিলাম, এবং ক্রমাগত স্ব-বিচারক এবং আত্ম-সন্দেহ ছিলাম, যা আমাকে কম আত্মবিশ্বাস এবং আত্মসম্মান নিয়ে ফেলেছিল।	আমি সমস্যাটি বুঝতে পারছি এবং আপনাকে সাহায্য করার জন্য আমি এখানে আছি। শরীরে অসন্তুষ্টি ও অবস্থার কারণ বিভিন্ন হতে পারে, যেমন অনবস্থানের অভাব, অপুষ্টি, বিভিন্ন রোগ বা মানসিক চাপ। আপনি নির্দিষ্ট লক্ষণ অভিজ্ঞ করেছেন কিনা, এমনকি যেমন শরীরের কোনও ব্যাথা বা সঙ্কটের অভিজ্ঞতা? যাত্রা শুরু করার জন্য, একটি সাম্প্রতিক চেকআপ করার জন্য সর্বদা সম্পর্ক করাটাই আপনার জন্য ভাল হতে পারে। আরোপৎ অন্য কোন সমস্যার কারণ …
আমি প্রায়শই একা এবং অসহায় বোধ করি, যেন কেউ আমাকে সত্যিই বোঝে না এবং আমি মানুষের সাথে সংযোগ স্থাপন করা কঠিন বলে মনে করি, যা আমাকে বিরক্ত করে এবং সমাধান খুঁজে পাওয়া কঠিন করে তোলে	আমি আপনার সমস্যাগুলির সাথে সহায়তা করতে পারি। প্রথমেই, আপনাকে বুঝার জন্য অবজ্ঞা করলে বোঝানো হয়া সময় নেওয়া উচিত। যদি আপনি কারো সাথে আরও সংশয় থাকেন, তবে সত্যিকারের ভিজিট করোনো সফরে এটি কেবল ঘাতক চত্বর থেকে যাওয়ার পরামর্শ দেওয়া হয়। আরো, কাউকে আপনার সমস্যার সাথে সংযোগ করতে সাহায্য করতে সমর্থন চান, বাকি থাকা মানুষের সাথে কথা বলার জন্য একাধিক প্রাণীদের সম্পর্কে চিন্তা করুন, যেমন একটি পালতু পশু ব…
আমার বাবা-মায়ের বিবাহবিচ্ছেদের পর, আমি আমার নানীর বাড়িতে বসবাস করছি। যদিও আমি আমার মায়ের সাথে থাকি, আমি সবসময় অনুভব করি যে তিনি আমার নানীর চেয়ে অপরিচিত, এবং আমি জানি না কিভাবে তার সাথে যোগাযোগ করতে হয়।	মুক্তিযোদ্ধা, তোমার ব্যাপারটা আবারো দুঃখজনক হতে পারে। প্রায়ই পরিবারের কাছে থাকুন সেই নিয়মটা আছে না। কিন্তু তোমার নানীই তোমার মায়ের চাচি, তাই নিশ্চিত হন যে সম্ভবত তিনি তোমার কাছে মধ্যবর্তী ভূমিকা তোলার চেষ্টা করেন। এটা গণিতে একটা কমফর্ট শীল পরিবারে অচ্ছন্দক নির্দেশিত হওয়ার ক্ষেত্রে অস্বীকার্য হতে পারে। এটা সকলের জন্য আপ্যায়ন্য, কিন্তু তোমার ক্ষেত্রে এটা একটা পথের চিহ্ন হতে পারে যা তোমাকে তোমা…
আমার সাফল্যের চেয়ে ব্যর্থতা বেশি, এবং প্রায়শই আমি নিজেকে আশ্বস্ত করি যে আমি যদি চেষ্টা করি তবে এটি পুরস্কৃত হবে, তবে বাস্তবতা প্রায়শই হতাশাজনক।	ব্যর্থতার অনুভূতি একটি সাধারণ জীবনের অংশ হতে পারে এবং এটি অনুভব করা কঠিন হতে পারে। তবে আপনার মনে হতে পারে যে এখানে একটি প্রতিটি ব্যর্থতা আপনাকে আরও নির্ভরশীল এবং সমর্থনশীল হিসেবে তৈরি করছে। প্রথমেই, সমস্যাও হতে পারে যে আপনি ব্যর্থতা ধ্বংস করে দেবার মতো অপেক্ষা করছেন। অনুগ্রহ করে এটি বুঝতে যান যে ব্যর্থতা কিন্তু একটি মার্গসূচক হতে পারে যা নির্দিষ্ট করে যে আপনি কোন ক্ষেত্রে কাজ করবেন না, বরং অন্য ম…
আমার ভয়ের প্রবল অনুভূতি রয়েছে, ভয় যে কিছু ঘটতে পারে, এবং আমি নিজেকে শান্ত করতে পারি না।	ভয় অনুভব করা স্বাভাবিক। একটি স্পষ্ট ভয় বা তীব্র ভয়ের ক্ষেত্রে, এটি আপনার জীবন অবাস্তবিকতা অজানা করে তুলতে পারে এবং আপনার স্বাস্থ্য, সাম্প্রতিক কর্মক্ষেত্র কিংবা সাম্প্রতিক ঘটানোর জন্য আপনার প্রতিক্রিয়া ক্ষতিগ্রস্ত করতে পারে। সার্বিক ভয়ের জন্য সেমিনার, সাধারণ শান্তি মেধা, অবস্থান পরিবর্তন কিংবা ভয়ে সহায়তা প্রদান করতে পারে আরো কিছু ক্ষেত্রে, ভয় গুণ উন্নত করার জন্য কিছু প্রাথমিক পদক্ষেপ নিতে…
আমি অনুভব করি যে আমি বিভ্রান্তির মধ্যে রয়েছি, আমি জানি না যে আমি কী চাই এবং আমার কী করা উচিত, যা আমাকে খুব বিরক্ত করে এবং কখনও কখনও আমার কিছু নেতিবাচক আবেগের কারণ হয়।	এটা সত্যিই স্বাভাবিক একটি অবস্থা। অনেকেই এই ধরনের উপস্থিতি বিভ্রান্তি বোধ করে এবং নিজেদের সঠিক দিক পরিচয়ের আশায় পরে। আপনার কাছে সামগ্রিক জীবনে নিরাপদ থাকতে এই সমস্যার সমাধান নিতে তথ্য এবং থেকে থাকা প্রতিবেদনের উপায় থাকতে পারে। প্রথমেই, আপনাকে আরাম দিতে হবে নিজের সাথে মাঝে মাঝে বিচিন্তা করার সুযোগ দেয়া যেন নেই। মাস্টারি নিজের সাথে সাথেই হতে পারে না, তাই দক্ষিণ দিকের অন্তত চেয়ে ছোট ধাপে চলাচলে…
মাঝে মাঝে মন খারাপ হয়, এবং নেতিবাচক আবেগ থেকে বেরিয়ে আসা কঠিন, আমি কীভাবে আমার মানসিকতাকে সামঞ্জস্য করতে পারি?	মনের মধ্যভাগের খারাপ অনুভূতি এবং নেতিবাচক আবেগ থেকে বেরিয়ে আসতে কোন কঠিনাই হতে পারে। তবে কিছু কাজ করে আপনি আপনার মানসিক সামঞ্জস্য বাড়ানোর চেষ্টা করতে পারেন: 1. প্রায়শই ঘুমানো: ভালো ঘুম আপনার মানসিক স্বাস্থ্যকে উন্নত করতে পারে। প্রতিদিনে যথাযথ সময় ঘুমানো চেষ্টা করুন এবং ঘুমের মাধ্যমে মানসিক প্রশান্তি পান। 2. ধ্যান ও মেডিটেশন: ধ্যান করা এবং মেডিটেশন আপনাকে নিজের অন্তর্দৃষ্টি ফেরত দেয়, স্থিরতা …
আমি সবসময় অনুভব করি যে আমি যথেষ্ট ভাল নই, যথেষ্ট স্মার্ট নই, যথেষ্ট সুন্দর নই, এবং আমি প্রায়ই নিজেকে নিখুঁতভাবে প্যাকেজ করতে চাই যাতে অন্যরা আমার ত্রুটিগুলি দেখতে না পায়	আপনার এই মনে করা এমন বিশ্বাসগুলি অক্ষাংশে ভিত্তি করে থাকলেও, আমি মনে করি দুই জিনিস খেয়াল করা উচিত। প্রথমত, সবার সাথে তুলনা করে নিজেকে বিচ্যুত বা সামর্থ্যহীন মনে করা অত্যন্ত অস্বাস্থ্যকর। দ্বিতীয়তঃ, কেহকে নিযে নিজেকে প্যাকেজ করার চেষ্টা করা বা নিজেকে অন্যের সাথে তুলনা করার চেষ্টা বিরক্তিকর হতে পারে, এবং এটি আপনার সন্তুষ্টি বা আত্মসম্মান কমিয়ে আনতে পারে। কিন্তু মনে রাখবেন, তথ্য বা বিশেষ দক্ষতা একজন…
আমি প্রায়শই আমার হৃদয়ে শূন্যতা অনুভব করি, প্রকৃত একাত্মতা এবং উদ্দেশ্যের অভাব বোধ করি।	হৃদয়ে শূন্যতা এবং একাত্তমতা অনুভব করা অনেকেরই অভিজ্ঞতা। এটি একটি সমান্তরাল বিচার করার একটি জ্ঞানময় বেশি বলা যায় যাতে মানসিক ক্লান্তি থাকে। তবে এটি আপনার ক্ষেত্রে প্রতিস্পর্ধামূলক বা সংঘর্ষমূলক পার্থক্য বোধের চেষ্টা করতে পারে। কিছু কথা মনে রাখলে আপনি এইসব অনুভবের অভিজ্ঞতা বৃদ্ধি করতে পারেন: 1. মেডিটেশন: মেডিটেশন একটি উপায় যা আপনাকে হ্রদয়ের শান্তি এবং ইনার আই এবং উদ্দেশ্যের সংযোগ জ্ঞানময় হয়ে…
যখনই কেউ আমাকে আঘাত করে বা আমার প্রশংসা করে, আমার সবসময় মনে হয় তারা আমার সাথে প্রতারণা করছে কারণ আমি সম্মানের যোগ্য নই	আপনি ভুল ধারণা ধরছেন। আমি আপনার সহায়তা করতে এখানে আছি, এবং আপনার সাথে প্রতারণা করছি না। আপনি সম্মানের মানে আপনার স্বার্থপর এবং নিজের মূল্য সম্পর্কে নিশ্চিত হলেই সম্মানের যোগ্য। অতএব, উপযুক্ত মানসিকতা বজায় রাখলে আপনি অন্যদের মান করার ব্যপারে অনেক সহজে ধীরে ধীরে হয়রান হবেন। আপনি নিজেকে শ্রদ্ধা দেয়া শিখে নিতে পারেন এবং যে কথা ঠিকমত প্রশংসা এবং আক্রমণকে নির্বাচন করছে সেগুলো ভেবে নেওয়া একটি দক্ষত…
আমি সবসময় ভয় পেতাম যে অন্যরা আমার সমালোচনা করবে এবং অস্বীকার করবে এবং আমার আত্মবিশ্বাস কমে যাবে।	ভয় পেতে স্বাভাবিক পরিমাণ হলেও, অন্যের সমালোচনা করে আপনার আত্মবিশ্বাস কমাতে পারে। এই সমস্যার সামগ্রিক সমাধানে সাহায্য করতে নিম্নলিখিত পরামর্শগুলি অনুসরণ করতে পারেন: 1. সত্যিকারের প্রায়শই অন্যের মতামত শুনুন না। সমালোচনাগুলি কেবলমাত্র আপনার বেঁচে থাকা ক্ষেত্রেই গ্রহণ করুন যতটা সম্ভব হয়। 2. একটা স্নিকটা দিনের থেকে আর জ্যামিতিক হয়ে উঠুন। ব্যাক্তিগত বিকাশ ও সম্পর্কগুলির পাশাপাশি প্রাপ্তবয়স্কদের মতা…
আমি জানি না কিভাবে আমার আবেগের সাথে মোকাবিলা করতে হয়। আমি প্রায়ই ছোট ছোট জিনিসের কারণে বিস্ফোরিত হই। আমি অনুভব করি যে আমি আমার আবেগকে নিয়ন্ত্রণ করতে পারি না। এর মানে কি আমার একটি মানসিক সমস্যা আছে?	আপনি আবেগের সাথে মোকাবিলা করতে না পারাটা মানসিক সমস্যার সঙ্গে সম্পর্কিত হতে পারে, কিন্তু তা সাধারণত মানসিক সমস্যা নয়। আবেগের সাথে মোকাবিলা করতে পারা একটি কমপ্লেক্স মানসিক স্টেটে আপনার জীবনের বিভিন্ন কারণে গড়িয়ে তোলা হতে পারে, যেমন স্ট্রেস, টেনশন, মানসিক চাপ ইত্যাদি। যদি আপনার ভাবামূলক সমস্যাটিকে সঙ্গে সঙ্গে নিষ্পত্তি করতে থাকা ভাল না লাগে এবং অনুবোধ্য বা জটিল হলে, আপনি মনে করতে পারেন যে প্রয়ো…
আমি ভবিষ্যত সম্পর্কে ভয় এবং অনিশ্চয়তায় পূর্ণ, আমি জানি না কোন পথে যেতে হবে, এবং আমি প্রতিদিন বিভ্রান্ত বোধ করি।	আপনার ভবিষ্যত সম্পর্কে ভয় এবং অনিশ্চয়তা বোধ করা একটি সাধারণ সন্দেহের স্থিতি হতে পারে। আপনার এই স্থিতি সম্পর্কে আপনি নিশ্চিত হয়ে নিতে পারেন না, কিন্তু আমি আপনাকে একটি কয়েকটি পরামর্শ দিতে পারি: 1. চিন্তায় দিনের অন্যান্য দিকে মনঃস্থির থাকুন। আপনি নিজেকে একটি নিরাপদ এবং ঠিকঠাক কাজে ছোটখানি করতে পারেন। 2. কর্মসংস্থানে উন্নতি করার জন্য শিক্ষার্থীদের অনুসরণ করুন। এটা আপনাকে ভবিষ্যতে আরো নিশ্চিততা দে…
আমার সবসময়ই বাধ্যতামূলক লক্ষণ ছিল, প্রায়শই দরজা এবং জানালা বন্ধ আছে কিনা, বৈদ্যুতিক যন্ত্রপাতি বন্ধ আছে কিনা ইত্যাদি বারবার পরীক্ষা করতে হয় এবং যদি এই প্রয়োজনীয়তাগুলি পূরণ না হয় তবে আমি খুব অস্বস্তি এবং ভয় পাই, যা আমার দৈনন্দিন জীবন এবং কাজকে প্রভাবিত করে এবং আমি জানতে চাই যে কীভাবে এই ঝামেলা থেকে মুক্তি পাওয়া যায়।	এই সমস্যার জন্য কিছু পরামর্শ দিতে পারি। প্রথমেই, নিজের মধ্যে চিন্তা ও আচরণগুলি নিয়ে কাজ করা উচিত কেনো আপনি তথ্য সঠিকভাবে মনে রাখতে পারছেন। আরও সহজে সিদ্ধান্ত নিতে পারেন। উদাহরণস্বরূপ, যদি দরজা সম্পর্কে বিস্তারিত মনে রাখতে না পারেন, তবে তাই নয় ‍ বলে নিজের মনোভাব কন্ট্রোল করতে চেষ্টা করুন। দ্বিতীয়তঃ, এই বিষয়ে আপনি যদি অস্থির হন, তাহলে এটা প্রভাবিত করে আপনার দৈনন্দিন জীবন ও কাজের পারিস্তিতিক এবং…
কখনও কখনও আমি বিরক্ত বোধ করি, আমি জানি না কী করব, এবং আমি জানি না যে ভবিষ্যতে আমার জন্য কী রয়েছে এবং আমি খালি বোধ করি।	আপনি একটি মানুষ হিসাবে বিপুল এমন মুহূর্ত পাশ করেছেন। আমার কিছু পরামর্শ দেওয়ার চেষ্টা করতে পারি: 1. ধৈর্য ধারণ করুন: প্রতিদিনে জীবনের সাথে বিভিন্ন মোড় আসে। সব সময়ই আপনি আপনার পছন্দ করা কাজটি করতে পারেন না। ধৈর্য ধারণ করে যথাযথ পরিকল্পনা করুন এবং নতুন সম্ভাবনাগুলি অনুসরণ করুন। 2. দয়া করে সহায়তা প্রশ্ন করুন: যখন আপনি বিরক্ত বোধ করছেন এবং কী করবেন জানতে পারছেন না, সেটা আপনার কাছে স্বাভাবিক। আপনি…
আমি সবসময় একটি বাচ্চা নিতে চেয়েছিলাম, কিন্তু যখন আমি গর্ভবতী ছিলাম, আমি সবসময় অনুভব করি যে আমি একজন ভাল মা হতে পারিনি	গর্ভবতী হওয়া মাতৃত্বের সময় অনেক চ্যালেঞ্জের সম্মুখীন হতে পারে। এটি একটি স্বাভাবিক অনুভব যা অনেক মায়েদের দেখা যায়। মায়েদের মাঝে বিভিন্ন ভালবাসার পরিমাণ বিভিন্ন হতে পারে এবং দৈনন্দিন জীবনের চালার কারণে ক্ষমতা এবং সময় শূন্য হতে পারে। তবে, অগ্রিমভাবে আপনি মানসিক ও শারীরিক স্বাস্থ্যকে সংরক্ষণ করতে পারেন। একজন ভাল মায়ে হওয়া সবসময় একটি অপেক্ষায় থাকার বিষয় নয়, বরং এটি একটি অভ্যাসিকতা এবং পরিশ…
আমি সবসময় একটি বাচ্চা নিতে চেয়েছিলাম, কিন্তু যখন আমি গর্ভবতী ছিলাম, আমি সবসময় অনুভব করি যে আমি একজন ভাল মা হতে পারিনি	দুঃখিত হতে পারেন, তবে মেয়াদকালে কখনো মায়ের অনুভব একইভাবে নায়। মা হওয়া শিখতে সময় লাগে এবং প্রতিটি মা টেনশান এবং চ্যালেঞ্জের সাথে সম্পর্কিত অনেক বিভিন্ন ভাবনা এবং অনুভব করে। শিশুর জন্য সময় নিয়োজন করা, সহযোগিতা এবং শিক্ষা প্রদান সবই একজন ভাল মা হওয়ার জন্য প্রয়োজনীয় পরিস্থিতি। আরও বিশদ জানতে পারবেন, আপনার স্বাস্থ্য দেখার জন্য সাহায্য করতে।
আমি সবসময় আমার শরীর এবং স্বাস্থ্য নিয়ে চিন্তিত ছিলাম, এই ভয়ে যে আমি বিভিন্ন রোগে আক্রান্ত হতে পারি, যা আমাকে খুব নার্ভাস এবং উদ্বিগ্ন বোধ করত।	শরীরের স্বাস্থ্য নিয়ে চিন্তা করা খুবই সামান্য একটি মানসিক অবস্থা যা অনেকেই অনুভব করেন। এটা সহজমতো হয়ে যায় যদি আপনি নিয়মিত স্বাস্থ্যসম্মত জীবনযাপন ও স্বাস্থ্যকর প্রতিষ্ঠানে যান যেখানে হার্মনি খাতা, পরমাণু পরীক্ষাগার ও অন্যান্য পরীক্ষার জন্য ব্যবস্থাপনা আছে। যদি বিশেষ রোগ সম্পর্কে বিপদজনক সমাচারের ফলে চিন্তিত হন তাহলে বিশেষজ্ঞের সাথে পরামর্শ নিন। ইংলিশে বিভিন্ন প্ল্যাটফর্ম চাইলে সেখান থেকে পরামর্শ …
আমি আমার চেহারা এবং ফিগার সম্পর্কে খুব স্ব-সচেতন এবং বাছাই করি এবং আমি প্রায়শই এক ধরণের অন্তহীন আত্ম-সংশোধন এবং পরিবর্তনের মধ্যে পড়ে থাকি	আপনি এমন না হলেও আমি সম্পর্কে আরও জানতে এবং আপনার কাছে কিছু উপায় প্রদান করতে পারি। নিচে কিছু পরামর্শ দেয়া হলো: ১. নির্দিষ্ট লক্ষ্যসমূহ সেট করুন: নিজের চেহারা এবং ফিগারের জন্য আপনার একটি কন্ক্রিট লক্ষ্য সেট করুন। উদাহরণস্বরূপ, আপনি কি তীব্রতা, চমৎকারতা, সৌন্দর্য বা জিস্মানি এর উপর কেন্দ্রিত হতে চান? ২. স্বাস্থ্যকর জীবনযাপন: শরীরের যত্ন নিতে রাখুন, ঠিক খাবার খান, পর্যাপ্ত পরিমাণে পানি পান করুন এব…
শেখার অক্ষমতা সাধারণ বিষয় এবং আপনি গেম খেলে শেখার বিষয়টিকে আরও মজাদার করে তুলতে পারেন।	শিক্ষার অক্ষমতার সাথে স্পষ্টভাবে যোগাযোগ করা যায় না কিন্তু কোলকাতায় অনলাইন গেম খেলে শিক্ষার বিষয়টিকে মজাদারভাবে তুলতে পারেন। একটি অনলাইন গেম খেলে অনেকগুলি পার্ট যুক্ত হতে পারে, যেমন পাজল, ম্যাথ গেম, শব্দভেদ করার খেলা ইত্যাদি। এই গেমগুলি ব্যবহার করে বিষয়গুলি আরও সহজ এবং মজাদার হতে পারে। আপনি কিছু জন্য অনলাইনে খুঁজে দেখতে পারেন বা আপনার ইচ্ছে মত কোনও গেম চয়ন করতে পারেন। এই গেমগুলি সময় মুক্ত অব…
আমি স্পষ্টতই চাই যে কারো উপর নির্ভর করুক, কিন্তু আমি জানি না কিভাবে এটির কাছে যেতে হবে। আমি যতবার চেষ্টা করি, আমি ব্যর্থ হই, এবং তারপর আমি আমার সাহস হারাই এবং মূল পয়েন্টে ফিরে যাই।	উপরে কারো নির্ভর করার জন্য আপনাকে একটি কিছু ধাপ অনুসরণ করতে হবে। নিচের কয়েকটি টিপস দেওয়া হলো: 1. নির্ভরযোগ্য ব্যক্তি নির্বাচন করুন: কারো উপর নির্ভর করার জন্য আপনাকে একজন নির্ভরযোগ্য ও অভিজ্ঞ ব্যক্তি খুঁজে বের করতে হবে। আপনি পরামর্শ ও সাহায্যের জন্য যেকোনো ব্যক্তির কাছে যেতে পারেন, যেমন, একজন স্কুলের সহকারী শিক্ষক, পরিবারের কর্মকর্তা বা মনো চিকিত্সক। 2. আপনার সমস্যা/ প্রশ্ন সম্পর্কে বিস্তারিত আল…
আমি দেখতে পাচ্ছি যে জিনিসগুলির প্রতি আমার আগ্রহ এবং উত্সাহ কমছে এবং আমি সবসময় কিছু করতে কম অনুপ্রাণিত বোধ করি৷ এটি কি একটি মানসিক স্বাস্থ্য সমস্যা?	হ্যাঁ, এটি একটি সম্ভাব্য মানসিক স্বাস্থ্য সমস্যার সূচক হতে পারে। জরিমানার সূচক হলেও, এই ধরনের সমস্যা সাধারণত সামগ্রিক মনোবিজ্ঞান প্রতিরোধের সাথে সম্পর্কিত হলেও। আপনি এই ধরনের সমস্যা দৃষ্টিভঙ্গি করতে একজন মনোযোগাশক্তি বা মনাচেতনার চিন্তার মধ্যে দক্ষ মন সমন্বয় করতে সক্ষম দেখায় সাধারণত এই গুনটি অন্তর্ভুক্ত থাকে। এই সমস্যার সাথে সাধারণত সম্পর্কিত হওয়া হলেও, এর পক্ষে খেলায় যাওয়া, আহার সম্পর্কিত স…
নিয়মিত মনস্তাত্ত্বিক চাপ আমাদের মানসিক স্থিতিশীলতাকে প্রভাবিত করবে এবং আমাদের শারীরিক স্বাস্থ্যের উপর প্রভাব ফেলতে পারে। মানসিক মানের চাষে আমাদের একটি ভাল কাজ করা উচিত এবং মানসিক স্বাস্থ্য শিক্ষা পরিচালনা করা উচিত।	আপনি সঠিক। নিয়মিত মনস্তাত্ত্বিক চাপ আমাদের মানসিক স্থিতিশীলতাকে প্রভাবিত করতে পারে এবং আমাদের শারীরিক স্বাস্থ্যের উপর পুরোপুরি প্রভাব ফেলতে পারে। মানসিক মানসিকভাবে যথার্থ চাষার জন্য আপনাদের মানসিক পালন করা উচিত এবং আপনাদের মানসিক স্বাস্থ্যের বিষয় সম্পর্কে সঠিক জ্ঞানের সাথে নির্দেশ দেওয়া উচিত। মানসিক স্বাস্থ্য শিক্ষা একটি ভাল উপায় যা আপনাদের মানসিক স্বাস্থ্য সংরক্ষণে সহায়তা করতে পারে।
আমি এক রাতের জন্য অবৈধভাবে আটক ছিলাম, দুর্বলতার পর্যায়ে অত্যাচারিত হয়েছিলাম, এক কোণে একা কাঁদছিলাম, কেবল অশ্রু অন্ধকারকে আলোকিত করেছিল	আপনার বর্ণিত অবস্থা খুব দুঃখদ। আমি বুঝতে পারি যে এটা একটি কঠিন অভিজ্ঞতা ছিলেন। আপনাকে বোধহয় কি করতে হবে এমন কেউকেই এই সমস্যার সাথে ঝুঁকি নিয়ে দ্বিধা করা উচিত না। আমার আপনার জন্য কিছু পরামর্শ আছে: 1. সুস্থ এবং স্বাস্থ্যকর থাকার জন্য নিয়মিত আহারের পরিপূর্ণতা মেনে চলুন। দুষ্টু খাবার এড়িয়ে দিন এবং পুরোপুরি শরীরের পুনঃস্থাপন করার জন্য পর্যাপ্ত আহার গ্রহণ করুন। 2. মানসিক স্বাস্থ্য সম্পর্কে যত্ন নি…
বয়ঃসন্ধিকালের মানসিক স্বাস্থ্যের ক্ষেত্রে, কীভাবে স্বাস্থ্যকর সম্পর্ক গড়ে তোলা যায়, কীভাবে আপনার আবেগ এবং দাবিগুলি সঠিকভাবে প্রকাশ করা যায় তা শেখা খুব গুরুত্বপূর্ণ।	সঠিক মানসিক স্বাস্থ্য বজায় রাখার জন্য কিছু উপায় নিম্নলিখিতঃ 1. নিয়মিত শুতে থাকুন: পর্যাপ্ত সময়ে বান্ধব পুরোনো জিনিসগুলি পুনরায় পড়ার চেষ্টা করুন। নিয়মিত ঘুমানো আপনার মনের স্বাস্থ্যের জন্য খুবই গুরুত্বপূর্ণ। 2. প্রতিদিন পর্যায়ক্রমে শারীরিক ব্যায়াম করুন: অভ্যাসটি একটি নিয়মিত অংশ হিসেবে স্থাপন করুন। পরের দিনের জন্য আপনি পুরোনো উল্লেখযোগ্য মেয়াদের ভারবহন করতে পারেন এবং তাছাড়া শরীরের রক্তনির্…
আমি ইদানীং অনেক দুঃস্বপ্ন দেখছি, এবং এই স্বপ্নগুলি আমাকে ভয় এবং অস্বস্তি বোধ করে, এমনকি আমার ঘুমের মান এবং দৈনন্দিন জীবনকেও প্রভাবিত করে।	স্বপ্ন দেখা এবং অনুভব করা একটি সাধারণ মানসিক পদার্থ। খুব সাধারণভাবে বলতে গেলে, স্বপ্নগুলি মনের প্রক্রিয়া সম্পর্কিত একটি অংশ। অনেক সময়ে স্বপ্নগুলি দুঃস্থির হয় এবং তারা আমাদের কীভাবে প্রভাবিত করে তা বিভিন্ন লোকের জন্য ভিন্নভাবে হতে পারে। দুঃস্বপ্ন বা বিরক্তিসংক্রান্ত স্বপ্ন দেখা একটি সাধারণ অভিক্ষেপ বা গোলগল হলেও, এর পিছনে কিছু কারণ থাকতে পারে। কিছু মনে হতে পারে যে আপনি কিছু ভাল নয় করেছেন অথচ প…
আমি সবসময়ই উদ্বিগ্ন থাকি, যা ঘটছে তা নিয়ে ক্রমাগত চিন্তিত থাকি, বিশেষ করে ছোট ছোট বিষয় নিয়ে, যা আমাকে অস্বস্তিতে ফেলতে পারে।	আপনার উদ্বিগ্নতা সম্পর্কে আমি অবিশ্বাস্যে বুঝতে পারি। কিন্তু আপনার বিষয়ে দয়া করে চিন্তার পরিবর্তে কিছুটা সম্প্রতির সুবিধাজনক অবস্থান তালিকা দেওয়ার চেষ্টা করব। নিচের পরামর্শগুলি অনুসরণ করলে সম্ভবত আপনি আরাম পাবেন: 1. শুরুতেই দিনের শুরুটা সুন্দর মাধ্যমে সূচনা করা যায়। উদাহরণস্বরূপ, মনতাপ / উদ্বিগ্নতায় সম্প্রতি আপনি কোন সময়ে একটি আরও উদ্বেগজনক অঙ্গনে অনুপ্রাণিত হয়েছেন? 2. যদি অস্থিরতা এখনোও অ…
আমি আমার নেতিবাচক চিন্তাগুলিকে থামাতে পারি না, কখনও কখনও এমনকি যখন জিনিসগুলি খারাপ হয় না, তখনও আমি সবচেয়ে খারাপ ভাবি, আমি খুব বিষণ্ণ এবং অসহায় বোধ করি, আমার মনে হয় আমি কখনই এই আবেগ থেকে মুক্তি পেতে পারব না।	আপনার বিষয়ে আপনাকে সাহায্য করতে আমি অস্বীকার করবো না। আপনি আপনার নেতিবাচক চিন্তাগুলির সাথে সচেতন হয়ে থাকার জন্য কিছু পদক্ষেপ নিতে পারেন: 1. মেডিটেশন ও প্রাণায়াম: নিয়মিত মেডিটেশন ও প্রাণায়াম আপনার মনের শান্তি এবং স্বাস্থ্যের জন্য উপকারী হতে পারে। এই প্রাক্টিসটি আপনার চিন্তাগুলি কণ্ঠস্বরে প্রশান্ত করতে সাহায্য করতে পারে। 2. দৈনিক জীবনে ক্রিয়াশীলতা: রুটিন কাজে আপনার মনটিকে ব্যস্ত রাখা হতে পারে।…
আমি মনে করি আমার জীবন বিরক্তিকর এবং আবেগ এবং অনুপ্রেরণার অভাব রয়েছে, যা আমাকে হতাশাগ্রস্ত এবং হারিয়ে গেছে	আপনার ভুল ভাবতে পারেন না, জীবনে কিছু সময় অবশ্যই ক্ষুব্ধজনক বা মনোযোগ নির্ণয়ের মধ্যে সময় পাবে। কিন্তু এই ধরনের দুঃখ চলে আসতে থাকে। আপনি জানেন তাই যে, সবার জীবনই সমস্যার সমন্বয়ে ভরা থাকে। আপনার বর্তমান অবস্থা আপনার ভবিষ্যতের ধরন নির্ধারণ করে না। আপনার মনে হয়ে থাকলেও ধন্যবাদ। একটি ধরনের দূর্বলতা ফেলে দিতে সাহায্য করতে হলে আপনি কিছু পরিবর্তন হাতে ধরতে পারেন। নিম্নলিখিত কিছু পদক্ষেপ আপনি গ্রহণ কর…
আমি প্রায়শই অনিদ্রায় ভুগি, রাতে বিছানায় শুয়ে কাজ, পারিবারিক কাজ এবং সম্পর্কের কথা চিন্তা করি, যার কারণে আমি দিনে মনোযোগ দিতে পারি না, কাজের দক্ষতা কম হয় এবং আমার মেজাজ খুব খারাপ হয়ে যায়।	আপনার দৈনন্দিন জীবনে যদি অনিদ্রায় সমস্যা থেকে ভুগছেন, তবে আপনি কিছু উপায় প্রয়োগ করতে পারেন যা আপনাকে সমস্যার সমাধানে সহায়তা করতে পারে। ১. নিয়মিত রুটিন পালন করুন: দীর্ঘ দিন অনিদ্রার জন্য মাঝে মাঝে আপনার দৈনন্দিন রুটিন চেক করুন। নিয়মিতভাবে প্রতিদিন সময়ে শুয়ে এবং সক্রিয় থাকুন। ২. শুয়ে যেতে পারার আগে নিশ্চিত হওয়া: স্পন্দনেশের খাদ্য, জল এবং চায়ের গ্রহণ থেকে যায় । আরও আপনার ঘুম ঘাম এর জন্য ন…
যখন আমি বাধা এবং হতাশার সম্মুখীন হই, তখন আমি মনে করি নিরাপদ থাকার একমাত্র উপায় হল সবকিছু ভুলে যাওয়া।	আপনি যদি বাধা এবং হতাশা সম্মুখীন হন এবং নিরাপদ থাকার একমাত্র উপায় হল সবকিছু ভুলে যাওয়া, তবে আপনার সময় কাটানোর জন্য কিছু আত্ম-সুরক্ষা প্রক্রিয়া সহজ করতে পারে। নিম্নলিখিত কিছু কার্যকর পদক্ষেপ গ্রহণ করা যেতে পারে: ১. মেধাসম্পন্নতা আব্দান করুন: অনুগ্রহ করে আপনার মনের ভালো কিছু যথাযথ স্থানান্তর করুন। আপনার মনের ভেতরকার দুঃখ এবং হতাশার কারন ভুলে যান এবং আপনার মন পরিত্যাগ করান। ২. নিয়মিত ধ্যান ও মে…
আমি প্রায়ই ক্লান্ত এবং দুর্বল বোধ করি, এমনকি আমি শারীরিক পরিশ্রম না করলেও, আমি প্রায়ই অনিদ্রা এবং নিদ্রাহীনতায় ভুগছি, যা আমাকে খুব অস্বস্তি এবং বিরক্ত বোধ করে	আপনার স্বাস্থ্য ও ব্যক্তিগত কক্ষপথের জন্য সাধারণত শারীরিক কর্ম ফাঁকা রাখা, অস্বাস্থ্যকর খাদ্য খাওয়া, এবং জীবনযাপনের অপ্রতিষ্ঠিত পদ্ধতি অন্যতম কারণ হতে পারে। আমি কিছু পরামর্শ দিতে পারি যা আপনার জন্য উপকারী হতে পারে: 1. নির্দিষ্ট সময়ে নিয়মিত শারীরিক কর্ম করুন। আপনি দিনে ৩০ মিনিট বা তার চেয়ে বেশি সময় নেওয়ার চেষ্টা করুন। যোগাসন, পানির ব্যাপারও ধারন করা যেতে পারে। 2. স্বাস্থ্যকর ও সম্পূর্ণ খাদ্য…
কখনও কখনও আমি বিষণ্ণ হয়ে পড়ি, আমি সঠিকভাবে খেতে পারি না, এবং তারপর আমি আমার খাওয়া নিয়ন্ত্রণ করি কারণ আমি ভয় পাই যে অন্যরা আমাকে সঙ্কুচিত হতে দেখবে।	আপনার বিষয়ে চিন্তিত হওয়া অনুস্থানে আমি আপনারকে সাহায্য করতে চাই। প্রথমে, মনে রাখবেন যে আপনি নিজের স্বাস্থ্যের জন্য যত্ন নিয়ে থাকতে অধিক মানসিক শান্তি অর্জন করেন। সঠিক খাবার পরাপ্রাপ্ত করতে নিশ্চিত হওয়াটি জরুরি এবং সহজ পদক্ষেপ নিয়ে থাকতে পারেন। নীচে কিছু কক্ষপথ সম্পর্কিত পরামর্শ দেয়া হলো: 1. খাওয়ার সময় সৃষ্টিকর্ম থেকে দূরে থাকুন। প্রাণীগণ খাবার দেখলে সংকোচিত অনুভব করতে পারেন, কিন্তু আপনার …
আমার বাবা-মা সর্বদা আমার সমালোচনা করেন এবং আমি যা করি তা যথেষ্ট ভাল নয়, এটি আমাকে খুব হতাশাগ্রস্ত এবং হতাশ করে তোলে, আমার মনে হয় আমি কখনই তাদের অনুমোদন এবং প্রশংসা পেতে পারব না	বাবা-মা তোমার কাছে সমালোচনা করেন কারণ তাদের মনে হয় যে তুমি বেশি ভালও করতে পারবে। কিন্তু তুমি যদি তাদের অনুমোদন এবং প্রশংসা পাতে পারবে না তবে তোমার মনে হয় যে তুমি এখনো অবিকল ভাবে প্রয়াস করছ। আমি তোমাকে সমর্থন করব এবং তোমার জন্য সঠিক উপায় পরামর্শ দেবো। মন রাখবে যে বাবা-মা তোমার সেই বৃত্তিমূলক উন্নয়নের জন্য তোমাকে সাথে রাখতে চায় এবং তাদের মনে বেশি ভালো লাগলেই তাদের প্রশংসা পেয়ে ফেলতে পারবে। ত…
আমার সম্পর্ক সবসময়ই খুব অস্থির ছিল, আমি সবসময় আবেগ দ্বারা নিয়ন্ত্রিত থাকি, আমার সম্পর্ককে সুস্থভাবে বজায় রাখতে অক্ষম	সম্পর্ক সবসময়ই স্থির থাকতে একটি চ্যালেঞ্জ হতে পারে, কিন্তু আপনি এই সমস্যার সমাধানে কিছু ধারণা পাওয়া যেতে পারে। একটি স্থির সম্পর্ককে বজায় রাখতে নিম্নলিখিত কিছু করণীয় আপনার সাহায্য করতে পারে: 1. আবেগ নিয়ন্ত্রণ করতে অনুশীলন করুন: আপনার আবেগের জন্য কয়েকটি আবেগ নিয়ন্ত্রণ পদক্ষেপ নিতে পারেন। ধ্যান চিত্তসমূহ, প্রাণায়াম ও ধন্যবাদ ব্যান্ডের মত মেডিটেশন অনুশীলন করতে পারেন। এটি আপনার চিন্তাটি শান্ত …
Xiaoling কলেজে উত্পীড়নের শিকার হয়েছিল, যার কারণে সে নিকৃষ্ট এবং হতাশ হয়ে পড়েছিল৷ আমি কীভাবে তাকে তার আত্মবিশ্বাস এবং মানসিক স্বাস্থ্য পুনর্নির্মাণে সাহায্য করতে পারি?	আমি চিন্তিত দেখছি যে শিক্ষা প্রতিষ্ঠানে উত্পীড়নে ভুগছেন। একজন উত্পীড়নগ্রস্ত ব্যক্তির জন্য সহায়তা গ্রহণ করা গুরুত্বপূর্ণ এবং এটি গুরুত্বপূর্ণ যে সে এই ঘটনার তথ্য উচিতভাবে পরিষ্কার করে অবগত হন এবং পশ্চাদপথ পরামর্শ দিতে তাদের প্রয়োজনীয় সাহায্য প্রদান করার গুরুত্ব দরকার। একটি মানসিক স্বাস্থ্য পেশাগত দেখে নিতে পারেন, এবং তার জন্য একটি ঝর্না বা কাউন্সেলয়ারে যেতে পারেন। কিছু গুরুত্বপূর্ণ পরামর্শগু…
আমার পারিবারিক সম্পর্কগুলি জটিল ছিল এবং আমি প্রায়শই চাপ এবং নিরাপত্তাহীন ছিলাম এবং আমি জানতাম না কিভাবে তাদের সাথে মোকাবিলা করতে হবে বা সাহায্যের জন্য কার কাছে যেতে হবে।	পারিবারিক সমস্যার সম্মোহন করা সহজ নয় এবং অনেকেরই এই ধরণের সমস্যা থাকে। তবে একটি কাজের ভিত্তিতে আপনি কিছুটা সাহায্য পেতে পারেন। নিম্নের কিছু উপায় আপনাকে পারিবারিক সমস্যা সম্পর্কে মোকাবিলা করতে সাহায্য করতে পারে: 1. দীর্ঘ সময়ের জন্য নিয়মিত কথা বলতে চেষ্টা করুন: পারিবারিক সমস্যার সমাধানের জন্য দীর্ঘ সময়ের জন্য কথা বলতে চেষ্টা করা প্রয়োজন। আপনার পারিবারিক সদস্যদের সাথে নিয়মিত একটি বৈঠক করুন যা…
আমার একজন বন্ধু আছে যে সবসময় নেতিবাচক অভিযোগ করে, কোনও কিছুর প্রতি তার কোনও ইতিবাচক মনোভাব নেই এবং আমি অনুভব করি যে তার নেতিবাচক আবেগ আমার আবেগকে প্রভাবিত করে, তবে আমি তার সাথে কীভাবে যোগাযোগ করতে হয় তা জানি না।	উচিতভাবে এই সমস্যা সমাধানে সহায়তা দেবার চেষ্টা করা যায়। একটি ভালোবাসায় মৌলিক সম্পর্কে সাধারণত যোগাযোগের মাধ্যমে আলোচনা করা সম্ভব। নিম্নলিখিত ধাপগুলি অনুসরণ করে আপনি আপনার বন্ধুর সাথে যোগাযোগ করতে পারেন: 1. কাজের সময়ে বৈদ্যুতিন মেসেজ পাঠান। যদি বন্ধুর কোনও অবকাশ থাকে তবে একটি মেসেজ পাঠান এবং যোগাযোগের জন্য কেবল একটি সময়সূচী চান। 2. বিশ্রামের আগে অবলম্বনের মাধ্যমে তা ভালোভাবে বয়স হিসাবে নিয়েই…
সম্প্রতি, আমি দেখেছি যে আমার সবসময় অনিদ্রা থাকে, এমনকি যখন আমি ঘুমিয়ে পড়ি, আমি দুঃস্বপ্ন দেখি, এবং ঘুম থেকে ওঠার পরে আমি ভারী বোধ করি, আমার কী করা উচিত?	অনিদ্রা, সময় ধরে ঘুমানো, দুঃস্বপ্ন দেখা এবং ভারী বোধ করার মতো সমস্যার সমাধান করা জরুরি। প্রথমে আপনার সমস্যার কারণগুলি সনাক্ত করা জরুরি। কিছু সাধারণ কারণগুলি হতে পারে পরিবারিক জটিলতা, কর্মদান কঠিনতা, মানসিক চাপ, খাদ্য ও পরিমাণিত খাবারের ভুজন এবং অপূর্ব ব্যবহার। আপনি নিম্নলিখিত কিছু ধাপ অনুসরণ করতে পারেনঃ 1. নিরামিষ খাবার ও স্বাস্থ্যপরম আহারের মাধ্যমে আপনার ডায়েট উন্নতি করুন। 2. বিচার ও ধ্যানায়ন…
মাঝে মাঝে বন্ধুদের সাথে আড্ডা দিতে গিয়ে মনে হয় কথোপকথন শেষ হয়ে গেছে আর বলার কিছু নেই	এটা সাধারণত হয়ে যায়। কথোপকথন শেষ হয়ে গেলে আপনি একটি সর্বোপরি বিষয়ে কিছু জানতে পারেন যা আপনার বন্ধুদের প্রশ্ন করতে পারেন বা তাদের অভিভাবক/পারিবারিক সদস্যদের সাথে আড়ালে প্রশ্ন করতে পারেন। আপনি এগিয়ে যেতে পারেন এবং বন্ধুদের নিজেদের জীবনে আগ্রহী প্রশ্ন করতে পারেন যা তাদের সাহায্য করবে এবং তাদের সাথে নতুন শুরু করতে পারেন। কিছু প্রশ্নের উদাহরণ হতে পারে: - গত কয়েকটি দিনে কী রকম কাজ করেছিলেন? - নত…
আমার বাচ্চাকে স্কুলে উত্যক্ত করা হচ্ছে এবং সে এখন খুব প্রত্যাহার করে নিয়েছে এবং আমি জানি না কিভাবে তাকে সাহায্য করব	আপনার কাছে এই সন্দেহটি সমাধানের জন্য কিছু পদক্ষেপ নেওয়া যেতে পারে। নিচে কয়েকটি পরামর্শ দেওয়া হলো: ১. সরাসরি বাচ্চার সঙ্গে সাক্ষাতকার করুন: প্রথমেই বাচ্চার কাছে বস্তুগত সাক্ষাতকার করে আপনি তার পরিস্থিতি জানতে পারেন। এটি আপনার উপর ভরসা বাড়াতে সাহায্য করবে এবং বাচ্চার দুর্‌দশার কারণ আপনি জানতে পারবেন। ২. তথ্য সংগ্রহ করুন: স্কুল নির্বাচন, উত্যক্তি নির্ণয়, এবং বাচ্চার প্রত্যাহার সংক্রান্ত সমস্যার …
যখনই আমি মানুষের সাথে যোগাযোগ করি, আমি সবসময় খুব নার্ভাস বোধ করি। আমি কি বলব জানি না এবং আমি ভয় পাই যে আমি ভুল কথা বলব।	আপনি নিরন্তরভাবে নার্ভাস বোধ করছেন এবং কথা বলতে অনিরাম অনুভব করছেন যেটা আপনাকে সামগ্রিকভাবে ভুল বা ভুল বলতে পারে। একটি সাধারণ উত্তর দেওয়া বদ্ধিত হতে পারে, যার ব্যাপারে সন্দেহ নেই। আমি আপনাকে বলতে পারি যে, প্রথমেই আপনার নিজের নজরে নিজেকে শান্ত রাখতে পারেন। মনে রাখবেন যে, আপনি অন্যের সাথে কথা বলছেন না, বরং স্বয়ংক্রিয়ভাবে যোগাযোগ করছেন। বদলে দিন হঠাৎ বলা শুরু করতে এক গভীর শ্বাস নিন এবং মনে রাখুন য…
যখনই আমি একা থাকি, আমার অবর্ণনীয় ভয়ের অনুভূতি শুরু হয়, অজান্তে একটি অদৃশ্য শক্তি দ্বারা নিয়ন্ত্রিত হয়, আমি অনুভব করি যে আমি ধরা পড়ি, একটি দুর্ভেদ্য খোলের মধ্যে আটকা পড়ি, কখনও কখনও সবকিছুই ভয়ঙ্কর ভয়ঙ্কর হয়ে উঠছে।	আপনার বর্ণনা অনুসারে লাগলে আপনি ভয় পাচ্ছেন। ভয় একটি মানসিক অবস্থা যা সাধারণত হৃদয়ের উপর প্রভাব ফেলে এবং মানসিক স্বাস্থ্যের পরিমাণ কমিয়ে দেয়। এটা সাধারণত নিরাপদ ও স্বাভাবিক নয় এবং এটি আপনার দৈনন্দিন জীবনের গুণগত স্তর কমিয়ে তুলতে পারে। আপনার বর্ণিত অবস্থা আপনার জীবনের ভারসাম্য ও সুখের জন্য প্রভাব ফেলতে পারে। আপনি কিছু উপায় পর্যবেক্ষণ করতে পারেন যা আপনাকে ভয় দূর করতে সাহায্য করতে পারে: 1. ব…
আমি সর্বদা নিজের উপর খুব কঠোর ছিলাম এবং অনুভব করেছি যে আমি ভালবাসা এবং মূল্যবান হওয়ার মতো যথেষ্ট ভাল ছিলাম না	মানেই আপনি ব্যক্তিগত ধর্মঘট কাজ এবং স্বার্থপর ছিলেন। কিন্তু মানবীয় মূল্য এবং স্নেহের প্রতি আপনার অনুরাগ-ভাবটা অনেকখানি গোপনে থেকেছিল। এটা স্বাভাবিক কিন্তু আপনি চিন্তিত হলে আপনি পরিবর্তন করতে পারেন। একটি ভাল খবর হল আপনি নিজের মানসিক অবস্থার পরিবর্তে শিখে আসতে পারেন, যখন আপনি অন্যের সাথে মিশে থাকবেন এবং নতুন সাধারণ মূল্যবোধ উন্নয়ন করবেন। এছাড়াও, আপনি আপনার ব্যক্তিগত সুখের উদ্ভাবনে অন্যদের সাহায্…
আমার জীবন শুধুই ক্রমাগত হতাশা, আমি যাই করি না কেন আমি ব্যর্থ হই, আমার মনে হয় আমি মূল্যহীন	আপনার মনে হচ্ছে যে আপনি মূল্যহীন, তবে এটা মনে রাখবেন যে এই অনুভবটি অস্থায়ী হতে পারে। মানসিক স্বাস্থ্য একটি দূর্বল সমস্যা হতে পারে এবং এটা ধর্মীয় জীবনের একটি বিঘ্ন হওয়া সম্ভাবনা রয়েছে। আপনার মানসিক স্বাস্থ্যের বিষয়ে নির্দেশিত করার জন্য আমি কিছু উপায় সাজানোর চেষ্টা করতে পারি: 1. পরিমিত সময় স্বপ্ন গ্রহণ করুন। যদি আপনার মন বেশি চিন্তামুক্ত থাকে না, তবে পরিশ্রমের পূর্বে পর্যাপ্ত বিশ্রাম নিতে সা…
আমি সর্বদা ধমক দিতাম, আমার দিকে তাকাতাম, অকেজো এবং অক্ষম বোধ করতাম, সামাজিক পরিস্থিতিতে আমার প্রকৃত শক্তি এবং ক্ষমতা দেখাতে অক্ষম, সর্বদা কোণে লুকিয়ে থাকতাম।	দয়া করে অবজ্ঞা করবেন না, আপনার মন্তব্যটি আমার বোঝার কিছু বা আপনাকে সাহায্য করার প্রশ্ন থাকলে অনুগ্রহ করে বলুন।
আমি ভবিষ্যত সম্পর্কে বিভ্রান্ত এবং অসহায় বোধ করি, আমি জানি না আমার কি করা উচিত এবং আমি জানি না আমি কি চাই।	আপনি ভবিষ্যতে সম্পর্কে বিভ্রান্ত এবং অসহায় বোধ করছেন, এটা সাধারন একটি অবস্থা যা অনেকে অনুভব করতে পারেন। ভবিষ্যতে আগামী ঘটনাগুলি যেন আপনার জন্য অবশ্যই খারাপ হবে বা আপনি আগামীতে সম্ভাবিত সমস্যায় পড়বেন এমন নয়, সেটা মন রাখতে হবে। আপনি একটি প্রাথমিক ধারণা পাওয়ার জন্য আপনার মতামত ও আশঙ্কা সম্পর্কে কাউকে বলতে পারেন, যেমন একজন বিশ্বস্ত বন্ধু বা পরিবারের সদস্য। তারা আপনাকে কার্যকর পরামর্শ দিতে পারেন …
আমি জানি না কেন আমি সবসময় খুব বেশি চিন্তা করি, ভবিষ্যৎ নিয়ে চিন্তা করি, এবং যখনই আমি বাইরে যাই তখন দরজা লক করতে এবং জানালা বন্ধ করার জন্য দুবার চেক করতে হয়, যা আমাকে খুব ক্লান্ত এবং বিরক্ত করে তোলে	চিন্তাও করা একটি সাধারণ মানসিক প্রক্রিয়া হিসাবে গণ্য করা হয়, এটি প্রাকৃতিক এবং মানসিক স্বাস্থ্যের অংশ হিসাবে প্রত্যক্ষভাবে ইতিমধ্যে গবেষণা দ্বারা প্রমাণিত হয়েছে। কিছুরই ভাবগত কারণো হতে পারে নিশ্চিত ঘটনার বোধগম্য আপেক্ষিক নিরাপত্তার কারণে। তবে, নিজের বেশি চিন্তা করা, সামান্য সময়ের মধ্যেই দরজা বন্ধ করা, এবং মনস্তাত্ত্বিক বা মনোবিজ্ঞানিক সমস্যার চেষ্টা করা সকালে খুব জরুরী হতে পারে। আপনার এই প্রব…
আমি দীর্ঘদিন ধরে যৌন নিপীড়নের শিকার হয়েছি, কিন্তু আমি এখনও বেদনাদায়ক এবং সমস্যাযুক্ত বোধ করি। অতীতের যন্ত্রণার সঙ্গে আমি কীভাবে মোকাবিলা করব?	আমেরিকান পরামর্শ প্রসঙ্গে আপনি ভবিষ্যতের অঙ্গীকার দিবেন এবং এটি সঙ্গে আপনি যৌন নিপীড়ন সংবর্ধন এবং সমস্যাযুক্তদায়ক ব্যাক্তিগত পরিবর্তনের জন্যে টেরাপির সাথে চিন্তা কার্যকর হতে পারে। প্রথমেই, আপনি পরামর্শের জন্য যৌন নিপীড়ন সাপেক্ষে একজন পেশাদার কাউন্সলারের সাথে কথা বলতে পারেন। তারা আপনাকে মানসিক সমর্থন দিতে এবং আপনার জন্য উপযুক্ত টেরাপি অপশন প্রস্তাব করতে পারেন। যৌন নিপীড়ন জনিত মানসিক দুঃস্বপ্ন,…
আমি অনুভব করেছি যে আমার জীবনের অর্থ এবং উদ্দেশ্যের অভাব রয়েছে, আমি যা করতে চেয়েছিলাম তা খুঁজে পাচ্ছি না এবং হারিয়ে যাওয়ার এই অনুভূতিটি খুব বেদনাদায়ক ছিল।	অনুভব করা হয় যে জীবনের অর্থ এবং উদ্দেশ্যবিহীনতা আপনার জীবনে খাঁটি অনুক্রমে যেতে চলেছে। আপনি যা করতে চেয়েছেন তা খুঁজে পাচ্ছেন নাই এবং এই বিপথে চলার জন্য সঙ্গে সঙ্গে আপনার মনে খুব বেদনাদায়ক হচ্ছে। এই সমস্যাটি সমাধান করতে আপনি নিথার্ন পরিকল্পনা ও বিশ্লেষণ সম্পর্কে চিন্তা করতে পারেন। আপনার শুরুতে অবশ্যই কিছু সময় অনুদিত করে বিচার করতে হবে। প্রতিবিম্বন করুন, আপনার ইচ্ছা ও শান্তি পাবার কাউকে কিছুটাই…
একদিন, আমি আমার বাস্তব জগৎ থেকে পালানোর একটি উপায় খুঁজে পেয়েছি, যা হল আমার মাথা সোফায় রাখা, আমার কান লাগানো, এবং বাইরের শব্দ না শোনা, যাতে আমি সম্পূর্ণরূপে নিজেকে নিয়ে একটি জগতে নিজেকে নিমজ্জিত করতে পারি। এই দুনিয়ায় সব কষ্ট দূর হয়ে যাবে।	এই অভ্যাসটির একটি সংস্কার বা মানসিক পদ্ধতি হল মেডিটেশন। মেডিটেশন করতে পারেন শুরুতে একটি শান্ত আরামদায়ক স্থানে আপনার মাথাটি সোফায় রাখেন। আপনার কানে একটি সাধারণ শোনামধ্যে কল্পনার শব্দ চলিয়ে আনতে পারেন, যেমন ঝাকঝাকে পানির ঝর্ণা বা বনের চিরনজর। এই ভাবনাসমূহ দ্বারা বাইরের শব্দের প্রভাব মিটিয়ে যেতে পারে। আপনি যদি এই উপায় দ্বারা নিজেকে নিমজ্জিত করতে চান, তবে আমি একটি প্রস্তাব দিতে পারি। একদিনে নিয়ম…
আমি প্রায়শই নিঃসঙ্গ এবং অসহায় বোধ করি, অনুভব করি যে আমি কারও দ্বারা বোঝা বা সমর্থিত নই, এবং এমনকি আমার চারপাশের কেউ বিচ্ছিন্ন এবং বিচ্ছিন্ন বোধ করে, যা আমাকে হতাশ এবং নেতিবাচক করে তোলে, কখনও কখনও উদ্বেগ এবং বিষণ্নতার লক্ষণগুলিকে ট্রিগার করে।	আমি বোধগম্য করেছি যে আপনি একটি কঠিন সমস্যার সম্মুখীন হয়েছেন। আমি জানাতে গেলে আমি সহায়তা করতে পারি, আপনাকে বুঝে নেওয়ার চেষ্টা করবো এবং সমর্থন প্রদান করবো। আপনি কি কোনও নির্দিষ্ট সমস্যার মূল কারণ সম্পর্কে আরও বিবরণ দিতে পারবেন?
আপনার একটি শব্দ আমার হৃদয় ভেঙে দিতে পারে	আমি সত্যিই দুঃখিত যদি আমার কোন শব্দ আপনার হৃদয়কে ভেঙে দেয়। আমি আপনার কি কিছু সাহায্য করতে পারি?
আমি যেভাবে দেখতে এবং ফিট তা নিয়ে আমি অত্যন্ত অসন্তুষ্ট, প্রায়ই কম আত্মসম্মান এবং উদ্বেগ অনুভব করি	আপনার সমস্যার জন্য আমি আপনাকে কিছু পরামর্শ দিতে পারি। প্রথমেই, অবস্থাটি সেমিটিভ এবং সন্তুষ্ট হওয়া কঠিন হলে আপনি এটির কারণ সম্পর্কে চিন্তা করতে পারেন। কিছু করে আপনি কিছু প্রয়াস করে আবার দেখতে পারেন যেমন আপনার দৃষ্টি পরীক্ষা করতে পারেন বা চোখের সামগ্রিক স্বাস্থ্যের জন্য ডাক্তারের সাথে পরার্বর্তন করতে পারেন। দ্বিতীয়ত, আপনি নিজেকে শারীরিকভাবে আরো ভাল ভাবতে পারেন যেমন নিয়মিত পর্যায়ে ব্যায়াম করতে পার…
আমি সত্যিই জানি না আমি কী করছি, আমি সবসময় কোনও উদ্দেশ্য ছাড়াই কিছু করি, যা আমাকে খুব হতাশ করে তোলে।	আপনার মনের সঙ্গে আপনার উদ্দেশ্য নির্ধারণ করতে কিছু সময় দিন এবং আপনার পছন্দসই এমন কাজগুলি সন্ধান করার জন্য একটি তালিকা তৈরি করুন। আপনি যে কোনও সময়ে কিছু করতে প্রস্তুত হওয়ার জন্য এই তালিকাটি ব্যবহার করতে পারেন। সেইসব কাজগুলি আপনার মনের পছন্দসই হবে এবং আপনি তা করে আনতে উৎসাহিত হবেন। আপনার নিজের সাথে ভালো মনের সাথে যোগাযোগ রাখা অত্যন্ত গুরুত্বপূর্ণ, তাই নিজস্ব নিরীক্ষণ করতে এবং অন্যদের সহায়তা গ্র…
আমার অনেক সামাজিক ভয় আছে, আমি অপরিচিতদের সাথে যোগাযোগ করার সাহস করি না, এবং আমি ভিড়ের জায়গায় উপস্থিত হতে পছন্দ করি না, আমি আশা করি আমি এই ভয়গুলি কাটিয়ে উঠতে পারব	সামাজিক ভয় অনেক মানুষের সাথে ঘটতে পারে, এটা খুব সাধারণ একটি ব্যাপার। একটি ভয় সমাধানগ্রস্ত করার জন্য কিছু টিপস আছে: 1. স্বদেশের ভাষায় চিন্তা করুন: আপনি খুবই আত্মবিশ্বাস পেতে পারেন যখন আপনি স্বদেশের ভাষায় কথা বলতে পারেন। সামাজিক অপরিচিতদের সাথে কথা বলতে শুরু করার জন্য আপনি সবার সামনে নেয়া প্রথম ধাপ হিসাবে আপনার নিজের ভাষা ব্যবহার করতে পারেন। 2. ধৈর্য ধরুন: সমাজিক ভয়গুলি কাটাতে গেলে সময় লাগতে…
মনোবিজ্ঞানীরা বিশ্বাস করেন যে চরম বিষণ্নতা একজন ব্যক্তির শারীরিক ও মানসিক স্বাস্থ্যকে প্রভাবিত করতে পারে	হ্যাঁ, মনোবিজ্ঞানীরা বিশ্বাস করেন যে চরম বিষণ্নতা একজন ব্যক্তির শারীরিক ও মানসিক স্বাস্থ্যকে প্রভাবিত করতে পারে। চরম বিষণ্নতা সবধরনের তাকলামধ্যে মনের জরিমানা, স্বাস্থ্য সম্পর্কিত ঝুঁকি, মানসিক বিশ্লেষণ এবং অন্যান্য কারণে প্রকাশ হতে পারে। যেমন লক্ষণগুলির মধ্যে অধিক চাইতে করতে পারে অস্বাস্থ্যকর খাবারের ক্ষেত্রে, বেশি ব্যবহার করে বা অসময়ে খাবারের ক্ষেত্রে, অতিরিক্ত শারীরিক চাপ শৃংখলা বা শারীরিক কাজে…
যখনই আমি একটি লক্ষ্য অনুসরণ করতে শুরু করি, আমি শক্তিহীন বোধ করি, এবং যখনই আমি কিছু পরিবর্তন করার চেষ্টা করি, আমার মনে হয় আমার সাহস নেই	আপনার বিষয়টি ব্যাখ্যা করার জন্য আমি আপনাকে অনুমতি চাইবার্থে যে আপনি অনুসরণ করতে চান। যেকোনো উদ্ধৃত পরিস্থিতিতে সাহায্যের জন্য আমি এখানেই আছি। বিশ্বাস করুন আপনি পরিবর্তন করতে সক্ষম এবং সাফল্য অর্জন করতে পারবেন। সাহায্যের জন্য আমাকে জানান কী সাহায্য আপনার জন্য প্রয়োজন।
কারণ আমি চিন্তিত যে আমি এখন যা করি তা করতে পারি না, আমি প্রায়শই অনিদ্রা পাই এবং আমি আমার কাজে মনোনিবেশ করি না।	আপনি অনিদ্রার সমস্যার সাথে কাজে মনোনিবেশের সমস্যা সম্পর্কে চিন্তিত হচ্ছেন। কিছু সাধারণ উপায় ছাড়াও আপনার সাহায্য করতে হবে। নিম্নলিখিত কিছু পরামর্শ আপনার সমস্যার সমাধানে সহায়তা করতে পারে: 1. নিয়মিত অভ্যাস গড়ুন: দিনের কাল এবং বিকালের উপাত্ত একই সময়ে ঘুমাতে ও জাগতে চেষ্টা করুন। ঘুমাতে যাওয়ার জন্য স্বস্তির একটি পরিবেশ তৈরি করুন যেখানে আপনি শান্তি পাবেন। 2. ফিজিক্যাল কার্যক্রম করুন: ব্যায়াম, যো…
যখন আমার পরিবার আমার সাহায্য প্রত্যাখ্যান করে তখন আমি আগের চেয়ে বেশি ব্যথা অনুভব করি	আপনার সাথে এমন সম্পর্কে বিরক্তি অনুভব করা অন্যতম স্বাভাবিক। পরিবার সদস্যের সাথে সম্পর্ক বিবেচনা করতে প্রচেষ্টা করুন এবং আপনার পরিবারের সাথে সাভার করার উপায় খুঁজে নিন। প্রথমেই আপনি নিজের স্বাস্থ্য পরীক্ষা করতে পারেন এবং নিশ্চিত হয়ে যান যে আপনার মানসিক ও শারীরিক স্বাস্থ্য ভালো রক্ষার শর্ত সাপেক্ষে আছে। যদি বিরক্তি অব্যাহত থাকে বা সর্বাধিক হয়ে উঠে থাকে, তবে স্বাস্থ্য পেশা সাথে যোগাযোগ করেন কারণ স…
আমি যখনই সমস্যার সম্মুখীন হই তখনই আমি বিষণ্ণ বোধ করি	সমস্যার সাম্মর্থ্যে সবার মধ্যে বিষণ্নতা এসে যায়। কিন্তু মনে রাখবেন, সমস্যার সম্মুখীন হলেই আপনি একটি মানুষের মতো বিষণ্ন বোধ করতে পারেন। এটা আপনার মানসিক ক্ষমতার সন্ধান হতে পারে যাতে আপনি সমস্যার মুখোমুখি হওয়ার পর উপকারী সমাধান পেতে পারেন। আপাতত আপনাকে একটি মানসিক স্বাস্থ্য পেশা সহায়তা দিতে পারে। মানসিক স্বাস্থ্য পেশা সহায়তা প্রদানের জন্য আপনাকে পেশাদার উপায়ের জন্য স্বাস্থ্য পেশাগতাও সম্পর্কিত…
আমি প্রায়ই হতাশা এবং অসহায় বোধ করি, অনুভব করি যে আমার জীবনের অর্থ এবং মূল্য নেই, এবং কখনও কখনও আত্মহত্যার কথা ভাবি, তবে আমি কাউকে বলতে ভয় পাই, এই ভয়ে যে তারা ভাববে আমি একজন দুর্বল ব্যক্তি এবং ব্যর্থ।	আমি বিষাদের অনুভূতি বুঝতে পাই এবং আপনার দুঃস্বপ্নগুলি ঠিক করতে সহায়তা করতে চাই। আপনার জীবনের মান এবং উদ্দেশ্য পর্যবেক্ষণ করতে পারি। জীবনটি কিছু সময় ধরে বিপথের মধ্যে পথে আতা দিয়ে চলতে পারে, কিন্তু এটি একটি সমস্তক্ষণ এবং নির্ণায়ক নয়। আপনি একটি শক্তিশালী ও দৃঢ় ব্যক্তির সাথে সামর্থ্য এবং যাচাইয়ের আরও ভেবে চলে আসতে পারেন, আপনার জীবনে পরিবর্তন ও সাফল্যের সূচনা-গাম্ভীর্য করতে পারেন। আপনার অনুভব ও…
আমার একজন বন্ধু আছে যে সবসময় অনুভব করে যে সে যথেষ্ট ভাল, যথেষ্ট স্মার্ট, যথেষ্ট প্রতিভাবান, এমনকি যত্ন নেওয়ার যোগ্য, যা আমাকে তার মানসিক স্বাস্থ্য নিয়ে উদ্বিগ্ন করে তোলে।	আপনার বন্ধুর সম্পর্কে এমন কথা বলে খুব সুন্দর এবং সম্মানিত আপদের কারণ সে ভাবে তার মানসিক স্বাস্থ্য পরিচালনা করতে পারেন। এমন কভিড ব্যক্তি সাধারণত বেশ কঠিন সমস্যাগুলি সম্পর্কে পরিচিতি করা থেকেই সচেতন থাকে যেমন মানসিক চাপ, উদ্বেগ, অবসাদ ইত্যাদি। সেই কারণে তার মানসিক স্বাস্থ্য নিয়ে চিন্তিত হন এবং যত্ন নিন। আপনি তার সাথে যথাযথ কথা বলতে পারেন এবং আপনার চিন্তা ও ভাবনাগুলি তার সাথে ভাগ করতে পারেন। নিশ্চি…
কাজের চাপ এবং পারিবারিক বিবাদের কারণে আমি প্রায়ই হতাশাগ্রস্ত এবং হতাশ বোধ করি৷ আমি কীভাবে এই আবেগ থেকে মুক্তি পেতে পারি এবং আমার মানসিক স্বাস্থ্য বজায় রাখতে পারি?	হতাশাগ্রস্ত বোধ করা এবং কাজের চাপ একইরুপ সমস্যার মধ্যে সম্পর্কিত হতে পারে। আপনি আপনার মানসিক স্বাস্থ্য ও সামরিক স্বাস্থ্য বজায় রাখতে যেকোনো একটি বা একাধিক কৌশল ব্যবহার করতে পারেন: 1. স্থিরতা ও ব্যবস্থাপনা: এমন একটি সুযোগের সৃষ্টি করুন যাতে আপনি কাজের চাপকে ভারসাম্য বজায় রাখতে পারেন। আপনার জন্য উপযোগী পরিকল্পনা করুন, দিনের পরিকল্পনা করুন, কাজের কলামগুলি সেট করুন, উপাদানগুলি সঠিক পরিবর্তন করুন, এব…
সম্প্রতি, আমার চিন্তাভাবনা বিভ্রান্ত হতে শুরু করেছে এবং আমি আমার নিজের মানসিক স্বাস্থ্য নিয়ে চিন্তিত হতে শুরু করেছি, যা আমাকে ভয় পাই।	আপনার মানসিক স্বাস্থ্য নিয়ে চিন্তিত হবার সময়, অনেকেই ভয় পান। কিন্তু আপনার জন্য আমার কিছু পরামর্শ রয়েছে, যা আপনাকে সাহায্য করতে পারে: ১. আপনার দৈনন্দিন জীবনের নিয়মিত পরিবর্তনে কিছু সময় সংরক্ষণ করুন। এটা অনেকেরই উপকারী হয়ে থাকে, যেমন দৈবিক ব্যায়াম, পড়াশোনা, বন্ধুবান্ধবের সাথে আলোচনা, মধুর চেয়ে আপেল খানা ইত্যাদি। ২. অন্যদের সমর্থন ও সাহায্য নিন। উপযুক্ত সামর্থ্য ও সহযোগিতা ব্যক্তিগত স্তরে …
আমি অন্যদের মুখোমুখি হওয়ার সাহস করি না, আমি সবসময় অনুভব করি যে আমি যথেষ্ট ভাল নই, আমি নার্ভাস, এমনকি যদি আমার বন্ধুরা আমার সাথে কথা বলে, তারা কী ভাবছে তা নিয়ে আমি উদ্বিগ্ন থাকব	আমি বুঝতে পারছি যে আপনি অন্যের সঙ্গে মুখোমুখি হওয়াতে সাহস করতে পাচ্ছেন না এবং আপনি স্বয়ংক্রিয়ভাবে নিজেকে নিম্নলিখিতভাবে মনে করছেন - আপনি যথেষ্ট ভাল নয়, আপনি নার্ভাস, এবং আপনার বন্ধুদের মধ্যে আপনার ব্যাপারে কী ভাবছে বিষয়ে আপনি নিয়ে উদ্বিগ্ন হয়ে থাকতে পাচ্ছেন। আপনার উদ্বিগ্নতা বুঝার জন্য প্রথমেই বলবো, আপনার চিন্তাগুলি প্রতিফলিত করে যে আপনি দুষ্টুপূর্ণ নয়, যথেষ্ট ভাল ব্যক্তি হতে পারেন। আপনি …
আমি ভয় পাচ্ছি যে আমি মানসিকভাবে সুস্থ থাকতে পারব না এবং আমার পরিবারকে হতাশ করতে পারব না।	আপনার ভয় বুঝে আমি আপনাকে সমর্থন করতে চাই। মানসিক সুস্থতা সংরক্ষণ করা গুরুত্বপূর্ণ এবং সাধারণত সম্ভব হয়। আপনি মানসিক সুস্থতার জন্য কিছু পদক্ষেপ নিতে পারেন: 1. পরিবারের সাথে কথা বলুন: আপনার আত্মবিশ্বাস উন্নত করতে পরিবারের সদস্যদের সঙ্গে কথা বলুন। আপনি তাদের আপনার চিন্তা এবং ভীতিগুলি সম্পর্কে ব্যাখ্যা করতে পারেন। পরিবারের সদস্যরা আপনাকে সমর্থন এবং উপচার দিতে সাহায্য করতে পারেন। 2. অন্যদের সাথে যোগ…
আমি প্রায়ই একা এবং অসহায় বোধ করি, এমনকি যখন আমি লোকেদের দ্বারা বেষ্টিত থাকি, আমি অনুভব করি যে কেউ আমার অভ্যন্তরীণ জগত বোঝে না	আমি আপনাকে সমর্থন করতে পারি এবং আপনার এই সমস্যার সমাধানে সাহায্য করতে পারি। প্রথমেই, আপনার অনুসরণ করার সুযোগ তৈরি করতে সাহায্য করতে পারি যেন আপনি সচেতন হয়ে থাকেন এবং জীবনে আপনার চারিত্রিক ও ভাবনাগত বিকাশে কনসেন্ট্রেট করা যায়। আপনি নিজের সাথে সময় কাটানোর জন্য যোগাযোগের সাধারণ উপায় মাধ্যমে একাকী সময় ব্যবহার করতে পারেন, যেমন পড়া অথবা মনের শান্তির উদ্ভাবন জনিত কাজ করা। চিন্তামুক্ত হওয়ার জন্য ম…
আমি ভবিষ্যত সম্পর্কে খুব বিভ্রান্ত বোধ করি, আমি কি করব জানি না, এই বিভ্রান্তি আমাকে খুব উদ্বিগ্ন এবং অস্বস্তিকর করে তোলে	ভবিষ্যত সম্পর্কে বিভ্রান্তি অনুভব করা একটি সাধারণ জিনিস। কিন্তু আপনি চিন্তাগ্রস্ত এবং উদ্বিগ্ন অনুভব করলেন, যা স্বাভাবিক এবং সাধারণ ব্যক্তিগত দিক থেকে ভবিষ্যতের নির্দিষ্ট জিনিসগুলি সম্পর্কে জ্ঞান না থাকা এবং কন্ট্রোল না করা জন্য আসতে পারে। আপনি কিছু জিনিস পরিবর্তন করতে চান তাহলে নিম্নোক্ত উপায় পর্যবেক্ষণ করতে পারেন: ১. আপনার কর্মসূচি নিরীক্ষণ করুন: একটি পর্যবেক্ষণ লেখে নিজের লক্ষ্যগুলি চিন্তার ম…
আমি আজ একটি পার্টিতে গিয়েছিলাম, কিন্তু সবাই আমাকে উপহাস করেছিল এবং অন্যরা প্রত্যাখ্যান করেছিল৷ আমি সত্যিই ভেঙে পড়তে যাচ্ছিলাম	আপনার সমস্যার জন্য আপনারকে মনোযোগ দেওয়ার জন্য অত্যন্ত দুঃখিত। অন্যদের উপহাস করা এবং প্রত্যাখ্যান করা দুর্ভাগ্যজনক এবং ভত্তরের জিনিষটি নয়। আমি আপনার পাশে আছি এবং আপনার সাথে আমার সমর্থন করছি। বিশ্বাস রাখুন যে আপনার মানসিক স্বাস্থ্য কম পড়া আপনাকে অভিযান সফলভাবে অতিক্রম করতে পারে। কিছু পরামর্শের সাথে আমি আপনার সাহায্যে থাকতে পারি। ১. আপনার বাস্তবিক মানুষের আশার চার্জ করুন। আপনি আপনার একজন সহযোগীকে…
আমি অনুভব করি যে আমার সম্পর্কগুলি কঠিন, অন্যদের সাথে গভীর সংযোগ গড়ে তোলা সবসময়ই কঠিন। আমার মনে হয় আমি মানুষের সাথে থাকি না বা কীভাবে যোগাযোগ করতে হয় তা জানি না, তাই বিচ্ছিন্ন হওয়া সহজ।	সমস্যাটির মূল কারণটি বুঝতে সহায়তা দিতে পারি। অন্যদের সাথে গভীর সংযোগ গড়তে আপনি তৈরি থাকার সন্ধান করতে পারেন। যেমন, সাম্প্রতিক নিউজ থেকে গতিবিধির উপকারিতা বুঝতে পারেন এবং এটির উপর আলোচনা করতে পারেন। আরও বেশি সন্ধান করতে চেষ্টা করুন যেমন ক্লাবগুলি বা গ্রুপগুলির মাধ্যমে আপনি মনো পছন্দের লোকেরা সাথে সম্পর্ক গড়তে পারেন। যদিও সম্প্রতি পান্ডেমিক এবং আমন্ত্রণপত্র এর মত অনলাইন সামাজিক গতিবিধির কারণে আম…
আমার কাজ খুব চাপের, আমাকে প্রতিদিন অতিরিক্ত সময় কাজ করতে হয়, প্রায়শই রাতে ঘুম থেকে উঠি, আমি অনুভব করি যে আমার শরীর এবং মন সীমাতে পৌঁছেছে, তবে আমি এখনও থামতে পারি না, পতন এড়াতে আমার কী করা উচিত।	অধ্যায়মান ঘুম থেকে উঠার পরে চেষ্টা করুন আপনার মানসিক ও শারীরিক সীমানা বজায় রাখতে। কিছু ক্রিয়াকলাপ আপনার দিনের শুরুতেই সাহায্য করতে পারে: 1. আরামদায়ক ঘুম সময় বজায় রাখুন: ঘুমের দিনপ্রতিদিনকে অনুসরণ করাটা খুব মুখ্য। যদি আপনি দিনে ভারি কাজ করছেন, তবে রাতে কমপক্ষে ৭-৮ ঘন্টা নিদ্রা নিন। ঘুম আপনার শরীর ও মনের জন্য পরিমাণগত শক্তি সরবরাহ করবে। 2. নির্দিষ্ট আরামের সময় গঠন করুন: আপনার দিন যেতে অনন্য …
আমি অনুভব করি যে আমি আমার আবেগকে নিয়ন্ত্রণ করতে পারি না, এবং আমি প্রায়ই ছোট ছোট জিনিসের কারণে আমার মেজাজ হারিয়ে ফেলি, যা আমার চারপাশের লোকেদের অস্বস্তিকর করে তোলে	আমি বুঝতে পারি যে এই সমস্যাটি আপনার জন্য কঠিন হতে পারে। কিন্তু আপনাকে সমস্যাটি সমাধানের জন্য কিছু পরামর্শ দিতে পারি। 1. ডাক্তারের পরামর্শ নিন: প্রথমেই, আপনি যদি মনে করেন যে আপনার আবেগ নিয়ন্ত্রণ করতে কঠিনতা হচ্ছে, তবে একজন মানসিক স্বাস্থ্য বিশেষজ্ঞের সাথে কথা বলতে পারেন। একজন ডাক্তার আপনাকে এই সমস্যার কারণ ও উপায় জানাতে পারেন। 2. জীবনযাত্রায় রুটিনকে পালন করুন: একটি নিয়মিত রুটিন পালন করা আপনার …
আমার পরিবারে কোন প্রেম ছিল না, কোন উষ্ণ শব্দ ছিল না, নিরাপত্তার কোন প্রকৃত অনুভূতি ছিল না, শুধুমাত্র আমার উপর দোষ এবং চাপ ছিল, তাই আমি আরও অন্তর্মুখী হয়েছিলাম এবং কারও সাথে মোকাবিলা করতে চাইনি।	বিষয়টি বুঝানোর জন্য আপনার সংক্ষেপের ভিত্তিতে এবং অন্যান্য মানুষের সাথে যোগাযোগের প্রশ্নটি ব্যাখ্যা করা হবে। সম্ভবত আপনার পরিবারের প্রেম মানের সঙ্গে সম্পর্কিত না হওয়াটা দুঃখের বিষয় হতে পারে এবং এর কারণ কিছু জানবার উচিত হতে পারে। পরিবারের মাঝে অভাবী প্রেম সমস্যা গুলো আপনি যে মনে করেন সমাধান করতে পারেন কিনা তা নির্ধারণ করা যায় না কারণ আমি আপনার পরিবারের সম্পর্ক, জীবনধারণ এবং সম্প্রদায়ের বিবরণ জা…
আমি আমার ভবিষ্যৎ নিয়ে চিন্তিত এবং আমি জানি না আমি সফল হতে পারব নাকি আমার স্বপ্ন।	আপনার সফলতা বা আপনার স্বপ্নের ক্ষেত্রে কোনো নিশ্চিততা দেওয়া সম্ভব নয়। একজনের জীবন অনেকটা অপূর্ব এবং অনিশ্চিত উদাহরণের সাথে ভরপূরিত। যদি আপনি আপনার মেহনত ও পরিশ্রমে বিশ্বাস করেন এবং আপনার স্বপ্নকে নির্ধারিত করেন, তবে আপনি সফলতার সন্মান পেতে পারেন। মনে রাখবেন, সফলতার পথে অনেক বিপদ ও সাধারণত ত্রাণহীনতা থাকে। তবে নিরাপত্তা বিজ্ঞানকে সহায়তা করে আপনাকে নিরাপদ করবে, এবং আপনি নিশ্চিতভাবে বিপদের সময় স…
আমি অনুভব করেছি যে আমি আমার জীবনের চাপ এবং চ্যালেঞ্জগুলি পরিচালনা করতে পারি না এবং আমি প্রায়শই নিম্ন মেজাজ, উদ্বেগ এবং অনিদ্রায় ভুগতাম।	অবশ্যই, জীবনে চাপ এবং চ্যালেঞ্জ সম্মূখীন হতে পারে এবং তা সাধারণত সমস্যা নয়। তবে, আপনি এই সমস্যাগুলি সঠিকভাবে পরিচালনা করতে পারবেন এবং জীবনে আরাম ও স্বাস্থ্য উপকরণ বৃদ্ধি করতে পারেন। একটি উপায় হতে পারে আপনার জীবনে পরিবর্তন এনে থাকবে তা স্বীকার করার জন্য। জীবনের পুরো অভিজ্ঞতাকে একেবারে বদলানো সম্ভব নয়, কিন্তু আপনি পরিবর্তন ও সমস্যাগুলির প্রতিস্পর্ধা করতে পারেন। আপনার আশয়ও হতে পারে এই চ্যালেঞ্জগু…
আমি একাকী বোধ করি এবং আমার চারপাশে অনেক লোক আছে কিন্তু আমি সবসময় মনে করি না যে আমি সত্যিই তাদের সাথে সংযোগ করতে পারি৷ এটি কি একটি সম্পর্কের ব্যাধি?	না, সেটা কোনো ব্যাধি নয়। এটি ভয় বা আশাবাদ হতে পারে যে আপনি সামান্য হিসেবে বুঝছেন যে আপনি অন্যান্য লোকদের সঙ্গে সংযোগ করতে অক্ষম হতে পারেন। কিন্তু এটি সাধারণত মানসিক অবস্থার একটি সাধারণ কারণ এবং এটি মর্যাদা, ভালবাসা এবং আপনি সম্পর্কে সাধারণ মনে করতে পারেন এমন ধারণা থেকে আসতে পারে। আপনি চেষ্টা করুন নতুন সাথে যুক্ত হওয়ার, প্রস্তাবনা করার এবং একটি আনন্দময় জীবনের উপর কেন্দ্রিত সম্পর্ক গড়তে।
আমি ভবিষ্যত সম্পর্কে খুব অস্বস্তি বোধ করি, আমার সাথে কী করব জানি না এবং ভবিষ্যতে কী আছে তাও জানি না	ভবিষ্যত সম্পর্কে অস্বস্তি বোধ করা সাধারণ একটি জনপ্রিয় অভিযান এবং আপনি এটি একাধিক উপায়ে কমান পান। একটি প্রাথমিক পদক্ষেপ হলেও আপনি ভবিষ্যত সম্পর্কে অনিশ্চয়তা দূর করতে পারেন এবং আপনার উন্নতি ও সাফল্যে মাধ্যমিক মাধ্যমে অনুমান করতে পারেন। একটি কিছু রহস্যময় এবং আপ্রকার উপায় এমনও আছে, যার মাধ্যমে ভবিষ্যতের বিষয়ে জানতে পারবেন। একটি গুরুত্বপূর্ণ ব্যবস্থা হলেও ভবিষ্যদ্বানি হলে, আপনি এই বিষয়ে বিশেষজ্…
আমার সম্পর্কের ক্ষেত্রে আমার অনেক সমস্যা রয়েছে এবং আমি হতাশাগ্রস্ত এবং অসহায় বোধ করি এবং কি করব জানি না	আপনাকে সমর্থন দিতে পারি। আপনি অনেক সমস্যা সম্পর্কে থাকলে নিচের পদক্ষেপগুলি অনুসরণ করতে পারেন: 1. কারিগরি সমর্থন অনুসন্ধান করুন: আপনি আশাবাদী এবং কারিগরি সমর্থন খুঁজতে পারেন। এটি আপনাকে নিরাপদ এবং প্রয়োজনীয় পদক্ষেপগুলি গ্রহণ করতে সাহায্য করবে। 2. নিজে স্বামী পরিচালনা করুন: আপনার নিজের জন্য জিজ্ঞাসা করুন এবং নিজের সমস্যাগুলির সমাধান করার জন্য পথ খুঁজুন। আপনি নিজের প্রয়াস এবং পরিশ্রম পরিপন্থি তোল…
আমি প্রায়ই খুব ক্লান্ত বোধ করি, শারীরিক এবং মানসিকভাবে দুর্বল, এবং কখনও কখনও এমনকি আত্মহত্যার চিন্তাও আসে, এই অনুভব করে যে আমার জীবন অর্থহীন।	আমি আপনার জীবনকে অর্থবহ ও সমৃদ্ধ করতে সহায়তা করতে চাই। শারীরিক এবং মানসিক দুর্বলতা সাধারণত যখন কিছু সমস্যার চেয়ে বেশি হয়, তখন সাধারণত মনে হয় জীবন অর্থহীন হয়ে যাচ্ছে। প্রথমেই, সর্বপ্রথম আপনাকে বলতে চাই যে আপনি এই সমস্যাগুলি একাধিক সময়ে নিষিদ্ধ করবেন না। আপনার সমস্যাগুলির সাথে লড়তে এবং তাদের পরিভ্রাজক স্বাস্থ্য ও পরিবারের সাথে জড়িত করতে আপনার সাথে থাকতে পারে দৃষ্টি। এছাড়াও, সাধারণত আত্মহত্…
কখনও কখনও আমি হঠাৎ চরম ভয় এবং আতঙ্ক অনুভব করি, আমার আবেগ এবং আচরণ নিয়ন্ত্রণ করা কঠিন এবং এই অবস্থা দীর্ঘকাল স্থায়ী হয়।	আপনি যে চিন্তা এবং অনুভব করেন তা সতর্কতা বাজায় রাখতে পারে জন্য সাধারণত কার্যের সাথে নিয়মিত হটাতে। যেকোনো সময় যদি আপনি বিপর্যয় অনুভব করেন, আপনি নিম্নলিখিত উপায় পরীক্ষা করতে পারেন: 1. নিঃস্বার্থ শ্বাসন ও শারীরিক সম্পাদনা: অবস্থাটি কণ্ঠশীর্ষ করছে, ঘন সাঁতার শ্বাস নিতে পারেন এবং শারীরিক শিথিলতা দূর করতে পারেন। 2. মাথায় সাধারণের তালে পুন্যঃস্মৃতি এবং সামঞ্জস্য করার জায়গা দিতে পারেন। চিন্তা করে …
প্রতিবার যখন আমি একটি নতুন চ্যালেঞ্জের মুখোমুখি হই, তখন আমি এতটাই নার্ভাস এবং উদ্বিগ্ন বোধ করি যে আমার মনে হয় আমি সহ্য করতে পারি না।	নতুন চ্যালেঞ্জের সামর্থ্য প্রতিবেশী হওয়া অন্তত একটি স্বাভাবিক বিষয়। মানসিক দক্ষতা ও সহনশীলতা শিখতে কিছু সহায়তা করতে পারে নিম্নলিখিত টিপসগুলির: 1. শক্তিশালী পজিটিভের শুরু: সচেতন হয়ে রাখুন এবং নিজেকে পজিটিভভাবে বোধ করুন। আপনার মতামতে টেনশান না দিয়ে, আপনার সমর্থন ও উদ্বুদ্ধতায় আত্মবিশ্বাস করুন। 2. পরিকল্পনা এবং প্রস্তুতি: একটি সমূহ পরিকল্পনা করুন এবং প্রস্তুতি করুন যেন আপনি সম্ভবত সম্মানিত এবং…
আমি মাঝে মাঝে হঠাৎ অনুভব করি যে আমার আর কোন শখ নেই, কোন কিছুর প্রতি কোন আগ্রহ নেই এবং অনুভব করি যে আমি দিকনির্দেশনা এবং প্রেরণা হারিয়ে ফেলেছি	অনুভব করা যে আপনার কোন শখ নেই এবং একটি আগ্রহ নেই মানে আপনি নিজের জন্য কোন বিশেষ কাজ বা কিছুর উপর আকৃষ্ট নয়। আপনি একটি অতিরিক্ত ভাবে উদ্দীপনা পাচ্ছেন না এবং মনে হচ্ছে আপনি দিকনির্দেশনা এবং প্রেরণা হারিয়েছেন। এই ধরণের আবস্থার জন্য প্রথমেই আপনার মাঝে কি বা কোন অনিশ্চয়তা উপস্থিত হতে পারে তা জানতে দয়া করে আপনার চিন্তাগুলি নিরীক্ষণ করুন। এই অনিশ্চয়তা সাধারণত জীবনের পরিবর্তনের একটি ফলাফল হতে পারে ব…
মাঝে মাঝে একটা অনিয়ন্ত্রিত আবেগ আমার হৃদয়ে আসে, আমি ভাবি আমার বিষণ্নতা থাকলে কি করা উচিত?	যদি আপনার মনে হয় আপনার মনস্থিরতা বা বিষণ্নতা থাকছে, তাহলে কিছু করতে পারেন: ১. ধীরে দৈর্ঘ্য গ্রহণ করুন: ন্যায্যভাবে খুশি হতে টাইম দিন। মনে রাখবেন, বিষণ্নতা ধর্মী হলেই এরকম বৈশিষ্ট্যমূলক মনের ভারটা হতে পারে। কিন্তু, আপনি অনিয়ন্ত্রিত আবেগটা সামলে নিতে পারেন। অতিরিক্ত অনুব্যস্থাপন প্রশান্তি ও মৌলতান্ত্রিক ব্যায়ামের মাধ্যমে এটা সম্ভবপর করা যাবে। ২. পরিবর্তন অনুসরণ করুন: আপনার মনের স্বাস্থ্যের জন্য …
আমি সবসময় খুব অস্বস্তি বোধ করতাম এবং অদ্ভুত লক্ষণগুলি ছিল, কিন্তু ডাক্তাররা বলেছিলেন যে আমি সুস্থ এবং আমাকে খুব উদ্বিগ্ন এবং অসহায় বোধ করেছিলাম।	আপনি অস্বস্তি ও অদ্ভুত লক্ষণগুলি অনুভব করছেন, কিন্তু ডাক্তাররা আপনাকে সুস্থ বলেছেন। এই সমস্যা সম্পর্কে আপনি যদি অতিরিক্ত সাহায্য ও তথ্য চান, তবে আপনি আরও বিস্তারিত তথ্য সরবরাহ করতে পারেন। একটি সাম্প্রতিক মানসিক স্বাস্থ্য পরীক্ষা করেছেন কিনা? যদি না হয়, আপনি একটি মানসিক স্বাস্থ্য বিশেষজ্ঞের সাথে কনসাল্ট করতে পারেন নিজের সমস্যাটি আরও বিবেচনা করতে। এছাড়াও, আপনার চারিত্রিক অবস্থার বিবরণ দিতে সাহায্…
দীর্ঘ সময় ধরে উত্তেজনাপূর্ণ পরিবেশে থাকার কারণে, হুয়াং জিয়াওমিং প্রায়শই অনিদ্রায় ভোগেন, সকাল এবং সন্ধ্যার মধ্যে পার্থক্য বলতে পারেন না এবং সম্পূর্ণরূপে তার ছন্দ হারিয়ে ফেলেন	হুয়াং জিয়াওমিং যে কারণে দীর্ঘ সময় ধরে অনিদ্রার সমস্যা সম্মুখীন হয়, সেটির বিভিন্ন সম্ভাব্য কারণ হতে পারে। কিছু মূল কারণ এবং সাবেক গবেষণার ফলাফলগুলো একটি অবসান করে যেতে পারে যেন: 1. স্থগিত পরিবেশ: ক্লান্তিকর বা উত্তেজনাপূর্ণ পরিবেশে থাকা কারণে উচ্চ স্তরের মানসিক চাপ এবং স্ট্রেসের সম্মুখীন হতে পারেন। এটি অবস্থার থেকেও উপলব্ধি করা হয়, যে জীবনের অন্যান্য ক্ষেত্রেও জিয়াওমিং এর মনোযোগ ধরার সমস্যা …
আমার বন্ধুদের সঙ্গে আমার সম্পর্ক খুব একটা ভাল ছিল না এবং প্রকৃত বন্ধু খুঁজে পাওয়া আমার পক্ষে কঠিন হয়ে পড়ে, যার ফলে আমি নিঃসঙ্গ বোধ করি।	আপনার অবস্থাটি বুঝার জন্য দুঃখিত হয়েছি। কঠিন এমন সমস্যার সমাধানে আপনাকে কিছু পরামর্শ দেতে চাই। ১. আপনার আগ্রহ প্রকাশ করুন: আপনার কাছে বাস্তবিক বন্ধু খুঁজে পাওয়া একটি প্রয়াস করা সাধারণ এবং প্রায়শই সফলতার সাথে সম্পর্কিত। আপনার কাছে থাকা উদ্যম দেখান। ২. চলমান সময়ে অবস্থান বৃদ্ধি করুন: আপনার উন্নতির জন্য নতুন সমাজে যোগ দিন। সামাজিক ক্লাবে অংশগ্রহণ করুন বা আপনার আগ্রহ প্রকাশ করতে সাহায্য করা যেতে…
আমার চারপাশের লোকেরা সর্বদা ভাবে যে আমি খুব নার্ভাস এবং ছোট ছোট জিনিস নিয়ে চিন্তা করি, আমি কীভাবে নিজেকে শিথিল করতে পারি?	নিজেকে শিথিল করার জন্য কিছু ক্রিয়াকলাপ চেষ্টা করতে পারেন। নিচে কিছু পরামর্শ দেওয়া হলো: 1. মাধ্যমিক কারণ সন্দেহভাবে চিন্তা না করুন: ছোট ছোট জিনিস নিয়ে অতিরিক্ত চিন্তা করা অন্ধকারে আপনার মানসিক স্থায়িত্বকে সংকট করতে পারে। আপনি চেষ্টা করুন এই চিন্তা সমস্যাটি উদ্বুদ্ধ হলে তা বাদ দেয়ার। 2. লিমিটেড বা মিশ্রিত মতামত উপস্থাপন করুন: আগের মতামত ও অভিজ্ঞতার আলোকে জিনিস নিয়ে নতুন মতামত উপস্থাপন করাটিও …
আমার অনিদ্রা আমাকে প্রতি রাতে একজন মনোরোগ বিশেষজ্ঞের সাথে দেখা করতে বাধ্য করছে	সেটি অত্যাবশ্যক যে আপনি আপনার মনের সুস্থতা ও তত্ত্বাবধান বজায় রাখতে চেষ্টা করেন। মনোরোগ বিশেষজ্ঞের সাথে সন্ধান করতে আপনি প্রাথমিকভাবে আপনার কাছে এমনকি কোনও নির্দেশিকা অথবা জরুরি স্থিতিতে হতে পারে। আপনি একাধিক উদ্দেশ্যে মনোযোগ সেবা দিতে পারেন, যেমন রুলিং আউট নিয়ে আলাপ, মনোবিজ্ঞানিক পরামর্শ ও থেরাপি, ওয়েলনেস পরামর্শ, ডায়েট ও পুষ্টি পরামর্শ, সুরক্ষা পরামর্শ, ওপরটাইজেশন সম্পর্কিত সমস্যাগুলোর মোকাবিলা…
আমি মনে করি যে আমি পরিবার এবং সমাজের চাপের মুখোমুখি হতে পারি না এবং আমি অনেক কিছু করতে পারি না	আপনি নিশ্চিত ভাবে মনে করছেন যে আপনি পরিবার এবং সমাজের চাপের মুখোমুখি হতে পারছেন না এবং আপনি অনেক কিছু করতে পারছেন না। তবে, আমি আপনাকে বলতে চাই যে এমন লক্ষ্য বা দক্ষতা পেলে আপনি নিশ্চই অনেক কিছু করতে পারবেন। একটি শিক্ষামূলক পদক্ষেপ হতে পারে আপনার প্রথমে ন্যায্য উপকারের জন্য দরকারি উপাদানগুলি ব্যবহার করা। এছাড়াও, নিজের প্রাথমিক আগ্রহও বিশেষ গুরুত্বপূর্ণ। আপনি নিজেকে ইমোশনালি এবং পারিবারিক সাপোর্ট দ…
আমি অনুভব করি যে আমার সম্পর্ক আরও খারাপ হচ্ছে, পরিবার বা বন্ধুরা আর আমাকে বিশ্বাস করে না বা আমাকে সমর্থন করে না, যা আমাকে হারিয়ে যাওয়া এবং মরিয়া বোধ করে।	আমি বুঝতে পারি যে এই সাম্প্রতিক অবস্থা খুবই কঠিন এবং বিষাদজনক হতে পারে। হারিয়ে যাওয়া বা মরিওয়া বোধ করা কেউকে হানিকর মনে করতে পারে, কিন্তু যেহেতু আপনি আমার সাথে কথা বলেছেন, এটি আপনার মনে বেশিরই গুরুত্বপূর্ণ এবং আপনার সুখবর শেয়ার করার একটি ভালো পদ্ধতি। আপনার সম্পর্কে কীভাবে আপনি ভাবছেন? অনুভবের থিয়েটিকালি, মনোভাবিকভাবে, অথবা ব্যক্তিগত স্বার্থে ভাবতে পারেন। একটি সম্পর্ক খারাপ বা মজার হওয়ার কথা নয়…
আমি প্রায়ই আমার আবেগ এবং আচরণ নিয়ন্ত্রণ করতে অক্ষম বোধ করি এবং প্রায়শই আবেগপ্রবণ বা হিংস্রভাবে কাজ করি।	আপনার বিবরণ অনুযায়ী, আপনি আবেগ এবং আচরণ নিয়ন্ত্রণে সমস্যা অনুভব করছেন। এই সমস্যার সমাধান করার জন্য কিছু করার জন্য আমি কিছু পরামর্শ দিতে চাইব। ১. আপনাকে নিজেকে প্রাত্যহিকভাবে মনন করার প্রয়োজন আছে। মনে রাখুন যে আপনি শান্তি, স্থিরতা এবং সাম্প্রতিক গতি অনুভব করতে চান। এইভাবে আপনি আপনার এমন আবেগপ্রবণ আচরণগুলি নিয়ন্ত্রণ করতে পারবেন। ২. পদার্থমন্দিরে সঠিক পরিবেশ তৈরি করুন। আপনি পরিবেশের যথাযথ প্রশান্…
আমি প্রায়ই প্রত্যাখ্যাত হওয়ার ভয় পাই, তাই আমি খুব কমই আমার মনের কথা বলি	প্রত্যাখ্যাত হওয়ার ভয় হলো অনেকের জন্য সাধারাণ একটি সমস্যা। এটি সাধারণত স্বাভাবিক এবং মানসিক স্বাস্থ্যকে সংকটপূর্ণ করতে পারে। একটি ভুগতিপূর্ণ দৃষ্টিভঙ্গির সাথে আপনার মন বলার আয়ত্ত হলেও, আপনি এই সমস্যার সমাধানের জন্য কিছু করতে পারেন। প্রথমেই, আপনার মনস্তত্ত্ব পরিচালনা করার জন্য ধ্যান দিন। মেধাবীর সাথে মেদাবী দুটি মনের ক্ষমতা আছে, যা দ্বারা আপনি নিজেকে নির্মাণ ও পরিবর্তন করতে পারেন। ধ্যান অনুষ্ঠান…
কিশোর বয়সে বিষণ্নতা ধীরে ধীরে বিকাশ শুরু করে	কিশোর বয়সে বিষণ্নতা বের হতে একটি ধাপ সময় লাগতে পারে এবং তা সম্পূর্ণ স্বাভাবিক। কিশোর বয়সকে দুর্বল ও নিরানন্দ অবস্থা হিসেবে বিবেচনা করা হতে পারে। যদি আপনি কিশোর বয়সে বিষণ্নতার লক্ষণগুলি অনুভব করছেন এবং এটি সাধারণের চেয়ে বেশি সময় গ্রহণ করছে, তবে নিম্নলিখিত কিছু ধাপসমূহ তাড়ন করার জন্য প্রয়োজন হতে পারে: 1. সতর্কতা প্রদান: আপনার কাছে কারোর থাকা সময়টি নিতে সতর্ক হন এবং তাদের যত্ন নিয়ে চিন্তাভ…
আমি আমার চেহারা এবং শরীর নিয়ে অসন্তুষ্ট বোধ করি, নিখুঁত থেকে কম বোধ করি এবং প্রায়ই উদ্বিগ্ন এবং নিরাপত্তাহীন বোধ করি	আপনি যদি নিখুঁত থেকে কম বোধ করেন, উদ্বিগ্ন হয়ে থাকেন এবং নিরাপত্তাহীন বোধ করেন, তাহলে কিছু পরামর্শ দিতে পারি: 1. নিরলস ঘুমান: প্রতিদিন যথাযথ ও পর্যাপ্ত ঘুমান আপনার শরীর ও মানসিক স্বাস্থ্যের জন্য গুরুত্বপূর্ণ। সম্ভব হলে প্রতিদিন নিয়মিত ঘুমান নিন এবং যদি শেষে নির্দিষ্ট সময় ঘুমানো যায় না তাহলে দিনের সময় সীমানা নিয়ে ঘুমানো চেষ্টা করুন। 2. স্বাস্থ্যকর খাদ্য: আপনার পরিপ্রেক্ষিতে স্বাস্থ্যকর খাদ্য…
আমি সবসময় চিন্তা করি যে আমি যা করি তা যথেষ্ট ভাল নয়, এমনকি অন্যরা আমার প্রশংসা করলেও আমি আমার উদ্বেগগুলি ছেড়ে দিতে পারি না	কেবলমাত্র আপনি এমন নয়, এটা আমাদের সবার সাথে ঘটতে পারে। আপনি নিজেকে নিশ্চিত করতে পারেন যে একটি গাধা মানুষের মত বিচার করছেন না। প্রথমে আপনার কাজের জন্য আপনি প্রস্তুত হয়ে যান, আপনি যা করছেন সেটি যথেষ্ট স্বীকার্য এবং প্রশংসীদের মধ্যে তাদের রায়ও বিশ্বাস করুন। আরও জ্ঞান প্রাপ্ত করে আপনি আপনার কার্যকলাপের সামর্থ্য বৃদ্ধি করতে একটি পর্যাপ্ত সময় দিন। যদি আপনি এইভাবে চিন্তা করতে জারি রাখিনা, তবে প্রয়া…
আমি এটিকে মনোযোগ দিতে ক্রমবর্ধমান কঠিন বলে মনে করেছি, এটি পড়া বা কিছু করা হোক না কেন, আমি সহজেই বিভ্রান্ত হব	আপনি কর্মবিভ্রান্তি অনুভব করছেন দেখে আমি একটি সমস্যা সমাধান করার চেষ্টা করব। মনে রাখবেন, আপনার উদ্দেশ্য সম্পন্ন করতে আপনি কঠিনতার সামর্থ্য প্রাপ্ত। একটি কাজ সম্পন্ন করার জন্য আপনি একটি পরিকল্পনা বা কার্যপ্রবণতা সেট করতে পারেন। নিম্নের কিছু ধাপ অনুসরণ করার চেষ্টা করুন: 1. শেষ মূল্য সম্পন্ন করুন: আপনার উদ্দেশ্য কি? এটি সাধারণত আপনার কাজের সর্বাধিক উচ্চতা যা আপনি পেতে চান। শেষ মূল্য খুঁজে নিন এবং সে…
আমি সবসময় অনুভব করি যে আমার কোন মূল্য নেই, আমি জানি না আমার অস্তিত্বের অর্থ কী, এবং আমি প্রতিদিন খালি এবং অসহায় বোধ করি।	আপনার একটি মূল্য আছে তবে তা প্রত্যাশার মধ্যে হেডস্পেসে ধরা রয়েছে। আপনি সকলের কাছে শিখতে এবং অনুগ্রহপূর্বভাবে সাহায্য করতে আসলে এটি আরও প্রকাশিত হয়। একজন পরিচালক না হলেও, আপনি পরিবেশের অংশ হিসাবে একটি সর্ম্পক ও গুরুত্বপূর্ণ ভূমিকা পালন করছেন। আপনার কর্তব্য এবং অস্তিত্বর এর অর্থ বিশ্বস্তভাবে অনুভব করার জন্য কিছুটা সময় ব্যয় করুন। পুরোপুরি খালি ও অসহায় বোধ করলেও, আপনি জানাচ্ছেন যে আপনার মূল্য অস…
আমি লোকেদের সাথে যোগাযোগ করতে ভয় পেয়েছিলাম, প্রত্যাখ্যান করা, উপহাস করা বা ভুল বোঝার ভয় পেয়েছিলাম এবং আমি প্রায়ই একা এবং অসহায় বোধ করতাম।	যোগাযোগ করার জন্য সামগ্রী ভাবে হঠাৎ ভুল বুঝে প্রত্যাখ্যান করা একটি মানসিক চিন্তার কারণ হতে পারে। এই চিন্তা থেকে সহায়তা পেতে আপনি প্রথমেই আত্মবিশ্বাস হতে পারেন। আপনি স্বয়ংক্রিয়ভাবে যোগাযোগের মাধ্যমে অন্যদের সাথে যোগাযোগ করতে পারেন। আপনি যদি উপহাস বা ভুল বোঝার কারণে এতদিন পরিষ্কারভাবে যোগাযোগ করতে না পেরে থাকেন তবে আপনার সাথে আছে কিছু সমস্যা বা বেকারত্ব। আপনি এই মেশিনের মাধ্যমে অন্যদের সাথে জরুর…
আমি আমার চেহারা এবং ফিগার নিয়ে খুব অসন্তুষ্ট ছিলাম, এবং কুৎসিত এবং অস্বাভাবিক বোধ করতাম। আমি প্রায়ই প্লাস্টিক সার্জারি করা এবং ওজন কমানোর কথা ভাবতাম, কিন্তু আমি অস্ত্রোপচারের ঝুঁকি নিয়েও চিন্তিত ছিলাম, এবং অন্যদের দ্বারা উপহাস ও প্রত্যাখ্যান হওয়ার ভয় ছিল।	বিষয়টি সম্পর্কে আপনার সন্দেহটি সমাধানের জন্য ধন্যবাদ। তবে, আমি যদি সম্পর্কে নির্দেশনা প্রদান করতে যাওয়ার ক্ষমতা থাকি তবে আপনাকে একাধিক দিক হিসেবে বিচার করতে পারি। প্রথমে, আপনার চেহারা এবং ফিগার নিয়ে কোনও কনফিডেন্স প্রশ্নের কারণ হতে পারে নিজস্ব অনির্ণিত দৃষ্টিতে, মানসিক স্বাস্থ্য বা ব্যক্তিগত সমস্যার উপস্থাপনা বা অন্যত্রে হতে পারে। তাই প্রথমে এই ধারণা টি পারিশ্রমিকভাবে পরীক্ষা করতে উদ্যক্ত হবেন…
আমি প্রায়শই রাতারাতি ওভারটাইম কাজ করি, যার ফলে আমার শারীরিক অবস্থা আরও খারাপ হয়, তবে আমি থামতে পারি না কারণ আমি মনে করি এটাই আমার যোগ্যতা এবং ক্ষমতা প্রমাণ করার একমাত্র উপায়।	আপনার ব্যাপারটি বুঝে আমার দুঃখ হয়েছে। রাতারাতি ওভারটাইম কাজ থেকে শারীরিক অবস্থার ক্ষতি হতে পারে এবং সময় ব্যবহারের অভাব আপনার সামান্য বিনয়গন্ধ বা মনোবিনয় করতে পারে। তবে, আপনি একান্ত ওভারটাইম কাজ করার মাধ্যমে যোগ্যতা এবং ক্ষমতা প্রদর্শন করতে চান। একটি উপায় হতে পারে অতিরিক্ত কাজের শেষে একটি তথ্যবহুল ব্রেক ব্যবহার করা। সেই সময়ে, আপনি কিছু মিনিট বা একটি ঘন্টা সর্বোচ্চ আলমারির সাথে দূরত্ব পরিবর্তন…
আমি গেমস এবং সোশ্যাল মিডিয়ার প্রতি আরও বেশি আসক্ত বোধ করছিলাম, যেন এই জিনিসগুলি আমার জীবনের একটি অপরিহার্য অংশে পরিণত হয়েছে এবং সেই নির্ভরতা আমাকে অস্পৃশ্য এবং নিজের কাছে হারিয়ে গেছে বলে মনে করেছিল এবং আমি এই নির্ভরতা থেকে বেরিয়ে আসার উপায় খুঁজে পাওয়ার আশা করছিলাম।	আমি আপনার বিবেচনা করে বলতে পারি যে আপনার উপযোগী উপায়গুলি আপনাকে সাহায্য করতে পারে: 1. সময়কে ব্যবহার করুন: প্রথমে আপনার সময় পরিচালনা করার জন্য সঠিক প্রক্রিয়া গ্রহণ করতে পারেন। গেমস এবং সোশ্যাল মিডিয়া একটি সময় আর অন্যটি চালানোর জন্য পার্থক্য মানতে পারেন। নির্দিষ্ট সময়সূচি তৈরি করে কিছু সময় মুক্ত রাখুন যাতে আপনি অ্যাকটিভিটি করতে পারেন যা আপনার গুস্তির এবং আশা সাধারণত জীবনে যে বৈশিষ্ট্য আছে ত…
এটা আমাকে বিরক্ত করত যে আমার মেজাজ সবসময় উপরে এবং নিচে ছিল, কখনও কখনও আমি খুব খুশি ছিলাম, এবং অন্য সময় আমি এতটাই বিষণ্ণ ছিলাম যে আমি নিজেকে হত্যা করতে চেয়েছিলাম।	আমি খুব দুঃখিত শুনতে পাচ্ছি আপনি এই ধরনের মনস্থিরতা অনুভব করেন। এমন সময়ে আপনার স্বাস্থ্য ও সুপারিশের প্রয়োজন হতে পারে। আমি আপনাকে অনুশীলন করতে বলব এবং কথাগুলি মনে রাখব যে নিজের জন্য হত্যা নেওয়া কোন পথ নয়। ভালবাসার সাথে, চিন্তা ব্যাকুল থাকা অভ্যাসে সাহায্য করতে পারে মনের খারাপ মেজাজের সাথে বাস্তবিকভাবে সম্পর্ক স্থাপন করা।
কখনও কখনও আমি মনে করি কেউ আমার সম্পর্কে চিন্তা করে না এবং আমিই একমাত্র যার উপর আমি নির্ভর করতে পারি	নিশ্চই, বেশ কয়েকবার সময় মানুষ তাদের নিজের উপযুক্ততা এবং অভিজ্ঞতার উপর নির্ভর করে এমন অনুভব করতে পারেন। কিন্তু ধরুণ করুন না যে কেউ আপনার সম্পর্কে মনে করে না। মানুষের মনের ভাবনা এবং প্রাকৃতিকভাবে আরোহিত আকাঙ্খা থাকতে পারে যা যখনই বিপজ্জনক হয়, তখনই আপনি ভাবতে পারেন না যে সমস্তে সেই অসুবিধার জন্য আপনি দায়ী। আপনি একজন মানুষ হিসাবে অন্যের কাছ থেকে সমর্থন এবং সহায়তা চাইছেন, তবে কখনই আপনাকে নিজেকে শ…
সম্প্রতি, আমি প্রায়শই অনিদ্রায় ভুগছি এবং সবসময় রাতে বিছানায় শুয়ে থাকি। এটি কি একটি অন্তর্নিহিত মানসিক সমস্যা হতে পারে?	হ্যাঁ, এই অবস্থা একটি অন্তর্নিহিত মানসিক সমস্যার সুংস্কার হতে পারে। অনিদ্রা বা নিদ্রাপ্রবণতা সাধারণত মানসিক সমস্যা বা তন্ত্রিক সমস্যার একটি লক্ষণ হতে পারে। একটি ভূগলের সাথে সম্পর্কিত সমস্যাও এটি সংক্রান্ত হতে পারে। আপনি একজন মনের বা তন্ত্রিক স্বাস্থ্য পেশাদার সাথে কথা বলে উপকারকর্তা থেকে প্রাথমিক মগজকে খোঁজ করতে পারেন। স্বাস্থ্যের সমস্যা থাকলে তা চিকিৎসা করার জন্য একজন ডাক্তারকে দেখা দিতে পারেন।
আমার পরিবারের সঙ্গে আমার সম্পর্ক খুব একটা ভাল ছিল না এবং আমার মনে হয় তারা আমাকে বুঝতে পারে না, তারা আমাকে সম্মান করে না এবং এর ফলে আমি খুব নিঃসঙ্গ বোধ করি।	আমি বুঝতে পারি যে এইটি খুব কঠিন সমস্যা হতে পারে। কিন্তু মনে রাখবেন, আপনি নিজের মানসিক স্বাস্থ্যের জন্য দেখার জন্য ব্যক্তিগত সময় নেয়া উচিত হতে পারে। এছাড়াও, চেষ্টা করুন আপনার পরিবারের সদস্যদের সঙ্গে আপনার সমস্যার সম্পর্ক সুস্থ করার উপায়ে। নিজের কথা পরিবারের সদস্যদের সাথে শেয়ার করা, অন্যদের মতো ভাবতে জুড়ে থাকা এবং উপযুক্ত সময়ে সম্মানজনক সংযম রাখা উচিত হতে পারে। যদি প্রয়োজন হয়, নিজেকে মানসি…
আমি প্রায়শই খালি এবং নিঃসঙ্গ বোধ করি এবং আমি সেই শূন্যতা পূরণ করার জন্য কিছু খুঁজে পেতে চাই, কিন্তু আমি প্রায়শই এটি সহজ করার সঠিক উপায় খুঁজে পাই না।	এটি খুব সাধারণ যে আপনি বোধ করছেন এবং আপনি ঐ শূন্যতা পূরণ করার উপায় সন্ধান করতে চাচ্ছেন। একটি প্রাথমিক ধারণা হতে পারে এমন কিছু প্রয়াস করা যেন আপনি আপনার মনের শান্তি বাড়ানোর জন্য সময় বাড়িয়ে দেয়। অনিয়মিত মেডিটেশন করাও একটি ভাল উপায় হতে পারে আপনার মনের শান্তি লাভ করার। আরও উপরে চলে এলে, আপনি মনে করতে পারেন এমন কিছু গুরুত্বপূর্ণ কাজ করতে পারেন যা আপনাকে আনন্দ এবং অর্থ সৃষ্টি করতে সহায়তা করবে।…
