# Supplementary material
Source: ML conference proceedings conference paper supplement (https://openreview.net/forum?id=JL42j1BL5h)
Supplement: supplementary_material [file Mental_Health_gpt.xlsx]

## Sheet: Sheet1
Input	Output
我经常感到孤独和无助，没有人能够理解我，我甚至觉得自己是一个失败者，没有任何价值和意义，这种感觉让我非常沮丧和绝望，我不知道该如何摆脱它们。	我很遗憾听到您正在经历这种感觉。首先，我想告诉您，您不是一个失败者，并且每个人都有价值和意义，即使有时我们可能感到不是这样。孤独和无助是很常见的情绪，很多人都能理解您的感受。 在处理这些负面情绪时，有一些有用的方法： 1.与他人交流：有时一个好的聆听者可以帮助您分担负担。了解您的感受并愿意倾听您的人可能会让您感觉更接近和安慰。 2.寻找支持：考虑寻找支持组织或课程，以帮助您学习处理这些情绪。这些资源可以提供关于如何处理负面情绪的信息和技能。 3.专注于积极事物：把注意力集中到积极事物上，比如追求自己的兴趣爱好，与家人和朋友共度美好时光，或者参与志愿服务。这些活动可以帮助您舒缓压力，并产生积极的情绪和感受。 4.保持身体健康：保持健康的身体对于心理健康至关重要，尝试保持适度的锻炼和健康饮食，优秀的睡眠习惯可以帮助您充电，精力充沛。 慢慢地，您可以通过这些技能和策略摆脱负面情绪，并开始重新感…
即使我只是去买了一包薯片，我也会担心别人会以为我这是一种吃太多的自暴自弃行为	请不要过分担心别人的看法。每个人都有自己的生活方式和选择。如果您只是购买一包薯片，并且这是您的自主选择，那么就没有必要为此感到羞耻或担心别人的看法。重要的是要保持健康的生活方式，并且让自己感到快乐和舒适。
我总是感到疲惫和无力，无法集中精力去完成自己的任务，甚至无法从事自己感兴趣的事情，这让我感到很沮丧。	感到疲劳和无力可能是生活方式或身体健康问题的体现。以下是一些建议，帮助您缓解疲劳和提高精力。 1. 睡眠充足：确保每晚睡眠时间充足，建议至少7小时，并保持一个规律的睡眠时间表。 2. 饮食健康：保持健康的饮食习惯，摄取足够的营养元素。避免高糖、高脂肪和高咖啡因的食物和饮品。 3. 适当运动：适当的锻炼可以提高身体的能量水平，但也不要过度疲劳。 4. 放松身心：适当放松自己，练习冥想、深呼吸、瑜伽等减压方法，帮助缓解疲劳和焦虑。 5. 寻求帮助：如果这些措施不能够改善你的症状，你应该寻求医生或心理医生的帮助。 最后，要提醒您，抽烟、酗酒、嗜好甜食等坏习惯也会影响精力和健康。要尽量避免这些不良习惯。
最近我总是睡不好觉，或者睡着了也会做噩梦，醒来的时候整个人都感觉非常的累和疲惫。	听起来你可能正在经历睡眠问题。以下是一些可能有用的建议： 1. 维护良好的睡眠环境：尝试保持干净、安静、舒适的卧室环境，尽量保持室内适当的温度和湿度。 2. 培养健康的
每次去看病都没有改善，而且心情还变得更差，常常病态地陷入自怨自艾	很抱歉听到你的不舒服和痛苦。如果你觉得看病没有改善，可能需要考虑换一个医生或者就医的方式。也可以尝试一些非药物治疗方法，如心理治疗、物理治疗、针灸、按摩等等。同时，保持积极的心态也很重要，可以尝试一些自我放松的方法，如冥想、深呼吸、瑜伽等等。记得找到适合你的方式，尽量避免自责和自我怀疑，你可以向周围的人或专业人士寻求帮助和支持，慢慢恢复健康。
我总是有种被孤立和排挤的感觉，即使在人群中也会感到孤独。	我很抱歉听到这样的感觉。这是一个普遍的经历，许多人都会有时感到孤独和排斥。但是，请记住，这并不是你的错。有时候这种感觉可能是由于我们的心理状态、生活环境、社交技能等因素造成的。以下是几种可能帮助你减少孤独和排挤感的方法： 1. 尝试参加社交活动，加入自己感兴趣的社群或组织，以遇到同样有兴趣爱好的人，也可以扩大自己的社交圈子。 2. 和他人保持联系，例如给老朋友发信息、打电话或发邮件，或者邀请他们一起出去吃饭喝咖啡等。 3. 找一个精神支持者，例如心理医生、治疗师或者志愿者组织，与他们交流并寻求支持。 4. 培养一种有益的爱好或习惯，例如阅读、旅行、瑜伽或其他活动，这些可以帮助你充实你的生活，也让你更容易找到志趣相投的人。 记住，处理孤独的方法因人而异。与朋友、家人或医生谈论你的情感也可以帮助你找到解决方案。也不要害羞，通过寻求帮助，你可以变得更强大、更坚定。
让自己沉迷于游戏，或网络是一种无形的心理压力	你说的很对。当我们过度沉迷于游戏或互联网时，我们可能会经历心理压力，例如焦虑、抑郁和孤独感。这种行为可能会导致我们忽视我们的责任和关系，如工作、学习、家人和朋友，从而影响我们的生活质量和幸福感。因此，我们应该时刻关注自己的行为并保持适当的平衡，以确保我们的身心健康和幸福。
最近压力太大了，每天都觉得非常焦虑，睡眠不好，头疼，心跳加速，好像随时会崩溃一样	听起来你正在承受很大的压力，这种情况下需要采取一些方法来缓解焦虑。以下是一些可能会对你有帮助的建议： 1.深呼吸和冥想：取一些时间进行深呼吸或冥想来放松身体和大脑。通过专注于呼吸或冥想，你的思维将会放松，你会感到的更加安心和平静。 2.锻炼： 在日常生活中增加锻炼可以释放身体内的紧张感。建议多出门散步，去游泳或者参加瑜伽课程。 3.放松技巧：使用一些放松技巧，例如按摩，收听音乐，艺术和手工艺活动等来减轻压力。 4.设定“断电时刻”：在晚上睡觉前禁用技术设备，这将有助于缓解头痛，甚至失眠。 5.与朋友和家人交谈：当你感到焦虑时，寻求与朋友和家人交谈，向他们寻求帮助和给予支持是情绪上的重要支持。 如果你感觉情况很差或无法处理压力，我们还强烈推荐您向医生或心理医生寻求帮助。
每次遇到困难和挫折时，我总是失去信心和动力，觉得自己无法应对	遇到困难和挫折是很常见的，大家都会遇到。你不要失去信心和动力，这样只会让困难变得更加困难。相反，你可以尝试以下方法来应对困难： 1. 分析问题：了解问题的来源和原因，找到解决问题的方法和途径。 2. 寻找帮助：寻找支持和帮助的人或组织，这些资源能够为你提供额外的知识、信息、鼓励和支持。家人、朋友、老师、导师以及专业顾问都是可以向他们寻求帮助和支持的人。 3. 学会接受失败：失败是成功的一个过程，我们都会失败，重要的是学会接受失败，并从经验中学习。 4. 坚持不懈：持续努力并不断尝试新方法是成功的关键。相信自己，保持积极的心态，这样能让你在面对困难时变得更加坚强。 希望这些建议能对你有所帮助，如果有任何需要帮助的事情，记得随时向我询问。
我总是担心自己做的事情不够好，我觉得自己好像一直在被别人的眼光所束缚着，这让我感到很压抑。	听起来你对自己很挑剔，这会给你带来很大的压力和负面情绪。其实每个人都有自己的优点和缺点，也没有人可以做到完美。所以不要过于担心和纠结自己的表现，而是多关注和发挥自己的优点，也接受不足之处，不要过于苛刻对待自己。 此外，关注别人的眼光也是我们无法避免的，但是我们需要给自己机会去表现自己，让别人看到我们的实际水平。如果你真的想做得更好，可以好好规划自己的时间和任务，分阶段完成目标，多与身边的人交流和学习，提升自己的技能和能力。 最重要的是，要相信自己的能力和价值，自信是成功的基础之一。相信自己，你一定能做得更好。
我总是担心自己做的每件事情是否正确，害怕别人对我有意见或批评，我经常因此陷入痛苦的自我怀疑中。	这听起来像是焦虑的表现，很多人都会遇到这种情况。但是，这种情况可以通过采取一些措施来改善。 首先，尝试认识到你的担忧并给自己一些宽限。可能你因为过度思考而陷入了情绪低谷，这时可以给自己放松一下，做点放松心情的活动。和朋友、家人聊聊天或者听听音乐、看看电影等，或者放松一下身体，做做瑜伽，练习深呼吸等。 其次，你可以尝试找到一个平衡的方式来处理事情。如果你担心自己做的不够好，那么试着更具体的计划一下，比如为每个任务制定一个详细的计划，这样你就能更清楚地了解该做什么，该如何开始，从而减少一些不必要的担忧。如果担心别人对你的意见或批评，你可以尝试去了解、接受和适应这些想法。 最后，你可以寻求专业的帮助，如咨询师或治疗师，这能帮助你更深层次地了解自己的担忧，探寻更有效的解决方法。
把心事憋在心里，总感觉自己会爆炸，躲不开别人的目光	如果你感到自己需要倾诉自己的心事，但又不确定是否应该与别人分享，你可以考虑寻求专业的心理咨询师或治疗师的帮助。他们会为你提供一个安全的空间，倾听你的心声，并为你提供支持和建议的指引。 同时，你也可以尝试通过写日记、画画、和朋友聊天等方式来宣泄自己的情感。分享你的感受可以帮助你减轻心理负担，缓解焦虑和压力，让你更自由地表达自己的情感。
我的家庭经历了一场突如其来的意外，我的父母都受到了严重的伤害，这让我感到无助和沮丧，甚至出现了抑郁症状。	非常抱歉听到您的遭遇，这种突如其来的意外确实会给人带来巨大的心理压力和负担。如果您感到需要寻求帮助，请不要犹豫与专业的心理医生或咨询师联系，他们可以给予您支持和安慰，并帮助您找到应对困境的有效方式。如果您想要一些自我疏导的方法，您可以试试以下建议： 1. 知道您的情绪是正常的。面对这种困境，不论您体验到的情绪是悲伤、愤怒、无助或恐惧，都是可以理解和正常的反应。 2. 认真照顾自己的身体和精神健康。保持良好的饮食习惯，进行适当的运动，以及保持良好的睡眠质量都是重要的。 3. 寻找支持和安慰。这可能意味着与朋友或家人谈话，也可能意味着找到专业人士的帮助。 4. 尝试寻求意义。虽然这种考虑可能只有在时间过去后才会出现，但有时想象自己在不幸中寻找意义和目的会有帮助。 5. 接受恢复是一个长期的过程。在这个过程中，请给予自己足够的时间和空间去悲伤和康复。 请注意，如果您的抑郁症状严重，您应该尽快与…
我发现自己越来越不喜欢与人交往，总是喜欢独处，没有兴趣参加社交活动或与人分享自己的生活，这种孤独感让我感到很沮丧	这种感觉是非常常见的，特别是在当前社会需要不断与人交往的背景下。首先，您需要意识到自己真正需要什么。是独处来反思自己和放松自己，还是需要人陪伴来寻找安慰和支持。如果您发现自己需要一些支持和安慰，那么尝试与亲近的人分享您的感受，并寻求他们的建议和支持。如果您确实非常喜欢独处，那么尝试培养自己的兴趣爱好，寻找一些让自己快乐和满足的事情来填满孤独的时光。重要的是确保自己不会过度独处，尽可能地走出去，与其他人互动和交流。
我有强烈的控制欲，总是想把所有事情都操控在自己手中，不允许别人干涉或插手，导致人际关系破裂	感谢您与我分享您的情况，控制欲可以是一种有害的行为，它可能会对人际关系造成负面影响。以下是一些可以帮助您减少控制欲的方法： 1. 认识到您的行为是一种控制欲，尝试观察自己的行为，记录下自己想要控制的事情，思考一下这些事情是否真的需要那么严格的控制。 2. 明确自己的控制欲会对他人造成影响，并尝试从别人的角度思考问题，学习尊重他人的意见和权利。 3. 尝试放松自己的控制欲，并学会相信别人，让他们来帮助您完成一些任务。 4. 寻求专业帮助，与一位心理医师或治疗师谈论您的控制欲，寻求治疗和支持。 希望以上建议能够对您有所帮助，祝福您能够顺利地克服控制欲，建立良好的人际关系。
我经常感到自己的思维很混乱，好像脑子里有太多的想法和声音在同时存在，让我感到很困惑和失落	这听起来像是焦虑症状。建议你找一个专业的心理医生或治疗师来帮助你处理你的想法和情绪。他们可以为你提供更多的工具和技巧来控制你的思维和情绪，以减轻你的焦虑并帮助你恢复平衡。同时，你可以尝试多做一些有益身心健康的事情，例如做一些运动、冥想或尝试其他的放松技巧。
为什么我做的每件事都会被家人批评	这个问题可能有很多原因，以下是一些可能导致这种情况的原因： 1. 理念不同：您和家人有不同的价值观和理念，这可能导致您觉得自己正在做正确的事情，但家人却认为这是错误的。 2. 沟通不畅：您可能没有与家人清晰地沟通您正在做的事情，以及你为什么选择这样做。这可能会导致家人误解您做事情的原因。 3. 家人过度保护：您的家人可能是过度保护类型，他们认为每件事情都必须由他们掌控。这可能会导致他们对您做的一切都会提出质疑。 4. 家庭氛围有问题：家庭中存在紧张或矛盾的氛围可能会导致家人对您的决策提出质疑或批评。 无论原因是什么，解决这个问题的最好方法就是与家人进行坦诚的沟通。试着向他们解释你的想法，并聆听他们的意见和考虑。如果你们能够开放地交流并相互理解，这种局面可能会得到缓解。
最近我总是感到疲惫不堪，每天都没有精神，即使睡了很久也没有好转	可能您正在经历一些压力或疲劳的症状。以下是一些可能会帮助您恢复精力的建议： 1. 休息：尝试每天保证充足的睡眠时间，并确保您的睡眠环境舒适和安静。您也可以考虑在一周末好好放松一下或尝试一些轻松的活动。 2. 锻炼身体: 适度的锻炼可以刺激身体，提高之后的精神状态，让您感到更加清醒和有活力。您可以选择自己喜欢的运动，比如慢跑、打篮球或瑜伽等。 3. 均衡饮食：摄入均衡、多样化的饮食，包括新鲜的水果和蔬菜，可以为身体提供所需的营养和能量，帮助您感到更加精力充沛。 4. 减轻压力：尽可能的减轻您的压力。了解自己的工作、学习和生活负担，并设法减少这些负担。可以透过阅读、散步、听音乐等方式，让自己的心情得到释放。 如果上述建议并未有效，请咨询您的医生或专业心理咨询师，以了解可能的其他健康问题或探讨其他恢复精力的方案。
我感觉自己已经失去了所有的动力和希望，觉得生命毫无意义	很抱歉听到你这种感觉，这是一种很常见的情绪，称之为绝望。这种感觉可能是由于生活的挑战或压力、失落或失败感、心理创伤、孤独、不满足的期望或其他人生事件造成的。如果这个感觉已经严重影响到你的生活，那么建议你先向专业人士寻求帮助，包括心理医生或心理治疗师、医生或其他专业辅导员。 另外，以下是一些你可以自己做的事情，来帮助缓解绝望和重新找回动力和希望： 1. 照顾自己：充分休息、均衡饮食、适度运动、维持良好的卫生习惯，这些都是让你感觉更好的基础。 2. 和朋友或家人谈谈：找个亲近的人，把你心里的烦恼和问题说出来，这样有时候就能缓解一些紧张和焦虑。 3. 改变心态：不要否定你现在的感受，但也要明确你可以改变现状并寻找新的不同的机会。 4. 寻找乐趣：找到你喜欢做的事情，例如音乐、阅读、旅行、写作等等。 5. 找到成功的经验：寻找你过去的成功经验，回忆起你做好过的事情和自己的优点和长处。 如果你有自…
我有时候会感到很紧张，而且我有时候也会心情低落，但我不知道怎么改变我的心情	感到紧张和心情低落是很正常的。您可以尝试以下方式来改变您的心情： 1. 做一些运动：运动可以释放身体中的压力，并且会释放大量的内啡肽和多巴胺，这些化学物质可以帮助您感觉更幸福和放松。 2. 找自己喜欢的事情：做您真正感兴趣的事情，比如看电影，听音乐，读书或做手工艺品，这些都可以帮助您放松心情。 3. 找人聊天：与亲密的朋友或家人交流可以释放您的压力，让您感到更轻松。 4. 找寻乐观的心态：尝试积极思考，尝试看到每件事的积极面。您可以使用一些心理学的技巧，比如正念，达到这个目的。 5. 睡眠足够且充足：充足的睡眠可以帮助您恢复身体的能力，减轻紧张和不良情绪。 希望这些建议能够对您有所帮助。
我感到自己的思维和感知出现了问题，我经常听到奇怪的声音或者看到奇怪的事情，让我感到很害怕	如果您感到这些声音或视觉上的事物干扰您的日常生活，让您感到害怕或不安，建议您尽快向医生寻求帮助。这可能是由于许多原因，包括精神疾病和神经系统问题等，需要进行专业评估和治疗。在寻求医疗帮助之前，您可以尝试一些放松的技巧，例如深呼吸和冥想，以减轻焦虑和失眠等症状。如果您有亲人或朋友，也可以寻求他们的支持和鼓励。
我常常感到紧张和焦虑，无法控制自己的情绪和压力，这让我感到非常不安和不安心。	感到焦虑和紧张是正常的，但如果这种情况影响了你的生活质量，那么你可能需要采取一些行动来控制这种情况。以下是一些你可以尝试的方法： 1. 深呼吸和放松练习：当你感到紧张和焦虑时，尝试呼吸深呼吸并进行放松练习。你可以找到一些冥想或深入放松的应用程序，并一直使用这些方法，直到你感到放松。 2. 运动：运动是一种非常有效的减轻压力和焦虑的方法。运动可以分散你的注意力，并帮助你释放一些身体紧张的能量。 3. 饮食：饮食也是控制焦虑的关键因素之一。尝试摄入足够的营养并避免过度的糖分和咖啡因类的食物和饮料。 4. 睡眠：足够的睡眠也是控制焦虑的一种方法。保持规律的睡眠时间表，并尝试在睡前放松身体和思维。 如果你的情况无法通过以上方法改善，建议你咨询医生或专业心理医生，以获得更好的帮助。
我经常感到孤独和无助，即使身边有人陪伴，我也感到很空虚。我不知道为什么会这样，我该如何寻求帮助？	感到孤独和无助是常见的情感，但如果这种感觉持续存在并影响到你的生活质量，可能是需要寻求帮助的。以下是一些建议，希望能对你有所帮助： 1. 找到支持：与信任的人交谈，向他们倾诉你的感受。这可以减轻你的负担，并让你感到更受支持。 2. 寻求专业帮助：如果你感到自己无法控制自己的情绪，或者需要更深入的疏导，可以考虑咨询心理医生或精神科医生等专业人士。 3. 寻找社交活动：参加一些兴趣小组或者志愿者组织等社交活动可以帮助你认识更多的人，并且从中获得更多的支持。 4. 培养自我意识：学会关注自己的感受和需要，并为自己制订合理的目标和计划。这可以增强你的自信心和自我控制力。 无论选择哪种方式，都要相信自己，坚持下去，相信未来会更美好。
我曾经经历过心理创伤，现在总是会回忆起那段经历并感到恐惧和痛苦，我需要寻求帮助来克服这种情绪。	很抱歉听到您经历了心理创伤。这种情绪被称为创伤后应激障碍（PTSD），是一种精神疾病，但可以治疗。 我建议您尝试咨询一位精神健康专家，例如心理治疗师或临床心理学家，他们可以帮助您学习应对技巧、减轻痛苦、缓解症状，并在康复过程中提供支持和指导。 此外，您可以尝试通过健康的生活方式来帮助自己，例如适当的运动、健康饮食、有趣的爱好和良好的社交网络。 最后，如果您感觉自己正受到严重影响，请不要犹豫寻求适当的专业治疗和支持。祝您早日康复。
我无法摆脱对过去的回忆，每当想起某些事情就会感到非常痛苦，甚至会影响到我的日常生活	这种情况下，您可能需要采取措施来帮助自己面对这些回忆。以下是一些可能有帮助的建议： - 寻求专业帮助。心理治疗师或精神科医生可以帮助您学会处理负面回忆的技巧。他们可以为您提供一些练习和工具来缓解痛苦。 - 练习冥想或深呼吸。这些技巧可以帮助您控制情绪，减轻焦虑和压力。 - 寻找支持系统。与亲密的朋友或家人分享感受，也可以帮助您减轻痛苦。参加支持小组也可以让您互相支持。 - 改变思考方式。尝试将重点放在当前的经历和目标上，而不是过去的事情。您可以制定计划来实现自己的梦想，让自己的思维逐渐从痛苦的回忆中解脱出来。 - 寻找一些放松的活动。例如阅读、绘画、瑜伽或散步。这些活动可以帮助您放松身心，减轻痛苦。 请记住，处理消极情绪的过程需要时间和耐心。只要您认真践行，慢慢地您就会发现自己能够逐渐克服这些回忆的痛苦。
我曾经被欺负过，现在每当我想起来都会感到很害怕，甚至会出现噩梦	很抱歉听到您曾经被欺负过。这种经历可以导致创伤和长期影响，有时需要支持和帮助才能克服它。这里有一些建议： 1. 和亲密的朋友或家人谈论：分享您的经历可能会让您更容易处理它。和理解和支持你的人谈论这个问题，并试图找到安慰和理解。 2. 寻求专业帮助：心理治疗和咨询可以提供有助于减轻创伤和恢复心灵的技巧和建议。 3. 练习放松技巧：放松技巧如深呼吸、瑜伽和冥想等都可以帮助减轻焦虑和紧张，从而减轻噩梦的发生。 4. 给自己时间和空间：处理创伤是一个持续的过程，所以给自己足够的时间来缓解它，并避免使自己的情绪压力过大。 最后，如果您感到需要任何类型的心理上的支持，请不要犹豫，尽早寻求专业机构的帮助。
我感觉自己越来越孤独，没有朋友，没有亲人，就算有人在身边也觉得很空虚，很难受	我很抱歉听到这样的感受。孤独是人类共同的情感经历之一，但是如果变得持续、深度或频繁，就可能影响到我们的精神健康。在这里，我可以向您提供一些帮助方法： 1. 寻找社交机会：参加社交活动、加入社群组织或社交媒体群体。这是进行社交和建立互动的好途径。 2. 与人交流：找人谈心，把自己的情感倾诉出来，有时候，通过交流我们可以找到和自己有共鸣的人，也可以得到一些新的建议和观点。 3. 培养自己的兴趣爱好：可以尝试学习新技能或尝试新的活动，以创造新的和感兴趣的机会。 4. 寻求心理咨询：如果自己的情感问题已经影响了日常生活，建议寻求心理咨询，这样可以得到专业人员的帮助。 5. 对自己的健康负责：身体健康与情感健康密切相关，所以要注意饮食习惯和运动，保持充足的睡眠，以提升自己的身体和精神状态。 希望这些方法能够帮到您，一定要坚信，您不是一个人，身边一定会有可以依靠的人。
我总是感到无法集中注意力，很难完成任务，而且经常感到疲惫和沮丧	这听起来像是注意力不足和焦虑的症状。以下是一些可能有助于缓解这些症状的建议： 1. 制定一个每日计划，并尝试按照计划完成任务。这将有助于使您更有组织和目标意识。 2. 练习放松技巧，如深呼吸和瑜伽。这有助于缓解焦虑和减轻疲劳感。 3. 每天进行身体锻炼，如散步或慢跑。这可以改善大脑功能和心理健康。 4. 避免使用电子设备，如手机、电视和电脑，至少在睡前1小时。这将有助于改善睡眠质量。 5. 建立良好的饮食习惯，包括多吃蔬菜、水果和蛋白质。这会改善身体健康和大脑功能。 如果您的症状持续存在或没有得到缓解，建议您咨询医生或健康专业人员，以获取更具体的建议和治疗。
我常常感到孤独和失落，无法和他人建立起亲密的关系，甚至对身边的人和事都失去了兴趣和热情。	感到孤独和失落的情绪是很常见的，但是如果这些情绪持续存在并影响了你的日常生活，就可能需要寻求帮助。以下是一些可能有助于缓解这些情绪的建议： 1. 寻求支持：可以向家人、朋友、医生或心理治疗师寻求支持和建议。有人可以倾听你的问题，提供支持和帮助，帮助你建立重要的人际关系。 2. 参加社交活动：加入俱乐部、志愿服务或参与自己感兴趣的社交活动可以扩大社交圈子，给自己带来新的机会和体验。这不仅可以帮助你认识新的朋友，也可以增加你的自信心和满足感。 3. 学习自我关注：对自己的感受、需求和兴趣进行关注和尊重是很重要的。你可以尝试在日常生活中更多地关注自己：例如关注自己的感受、注意自己的呼吸、进行冥想或轻松的运动等。 4. 寻求专业治疗：如果上述方法无效或情况比较严重，可以寻求专业的心理或医学治疗。治疗师可以为你提供更具体的建议和帮助，帮助你找到并解决问题的根源。
我感到孤独和失落，觉得自己无法与他人建立亲密的关系，这让我感到非常沮丧和无助	听到你这样说让我很关心你。建立亲密关系对于我们的心理健康是非常重要的。首先，你要知道你并不孤单，很多人在某些时候都会感到孤独。建立亲密关系需要时间和努力，但并不是不可能的。 首先，你可以试着多和人交往，参加社交活动，加入兴趣小组等。在这些场合，你可以遇到和你有相同经历和想法的人。 其次，你可以尝试着分享你的内心感受，让别人更好地了解你。说出你的感受，可以让你得到别人的理解和支持。 此外，当你遇到自己喜欢的人时，要勇敢地表达出来。不要害怕被拒绝，每个人都有和不和你合拍的人，也许下一个人就是你的知己。 最后，如果你一直感到沮丧和无助，可能需要考虑寻求专业的心理帮助。心理医生可以帮助你更深入地了解你的情况，并提供适当的治疗方法。 记住，建立亲密关系需要耐心和努力，但不要轻易放弃。
身边的人都很开心，而我却觉得内心空虚，无法享受任何快乐	这可能是因为你缺乏重要的东西或经历了某些挫折而感到内心空虚。首先，你可以尝试找出自己感到空虚的原因。如果你无法自己解决，可以考虑寻求心理咨询，与专业人士探讨并找到方法来缓解内心的焦虑与压力。此外，也可以尝试做一些有意义的事情，例如参加社区活动、旅游、学习新技能等等，这能让你重拾生活的乐趣。最重要的是，不要害怕寻求帮助和支持，这会让你感到更加坚强和自信，从而克服内心的空虚感。
我的自尊心很低，经常感到自己无用和无足轻重，导致我不敢追求自己的梦想和目标，害怕失败和被别人看不起。	我很理解您的感受。低自尊心是一个常见的问题，但它是可以改变的。以下是一些建议，帮助您提高自尊、信心和积极性： 1. 接受自己。首先要做的是接受自己的缺点和不足之处。无论您的外表、才能或者能力如何，都应该明白每个人都有弱点和不足，这是很正常的。 2. 突破限制。不要让自己被过去的固定想法所限制。例如，“我从小就不善于社交”或者“我从来没有尝试过这个领域”。接受新的挑战、学习新的技能和尝试新的经历，可以让您的自信和自尊心提高。 3. 设置小目标。制定一些可实现的小目标，实现这些目标会使您的自信心得到提高，也会教您需要的技能和坚持不懈的能力。成功实现一个目标后，不要忘记表扬、庆祝自己。 4. 与积极人士交往。与那些积极、自信、充满生命力的人士交往，会让您的自尊心得到提高。他们会鼓励、支持和促进您的成长，同时教您如何积极、灵活地看待事情。 5. 重视自我关怀。在日常生活中，要注意自己的身体健康、…
我发现自己对一些事情变得过于敏感，经常会为一些小事情感到不安和担忧	这种情况可能是由于焦虑症状的表现。建议您先尝试通过身体锻炼、呼吸练习、冥想等方法缓解焦虑情绪。另外，与亲友或专业心理医生沟通，了解更多的心理健康技巧，也可以帮助您缓解焦虑情绪。尝试将自己的注意力集中于积极、让自己感到放松的事情，比如看喜剧电影、听音乐、进行放松活动等，这些都有助于您缓解焦虑情绪。
我的父母总是对我期望很高，要我成为一个优秀的人，但是我感觉我达不到他们的标准，我很焦虑和自卑	我理解你的感受，受到家人的高期望压力会让人感到焦虑和自卑。首先你需要知道的是，你不必在意别人对你的期望，你只需要做到自己最好就可以了。成功与否不仅取决于你的能力，还取决于你的兴趣爱好、性格特点以及生活经历等等因素。 其次，你需要和家人沟通，告诉他们你的真实想法和感受。你可以告诉他们你的困惑和不安，以及你对未来的规划和想法。也许他们会理解你的感受，给予你更多支持和鼓励。 最后，做自己喜欢的事情，因为只有真正喜欢做的事情才能让你取得长期的快乐和满足感。通过不断的尝试和努力，你一定能够找到最适合自己的道路，成为一个快乐而自信的人。
我每天都做梦，不断地重复，好像迷失在没有出口的迷宫里	做梦是很正常的现象，它是我们大脑发挥自己的创造力和想象力的一种方式。但如果你觉得自己每天都做梦且无法自拔，可能需要注意一下自己的睡眠质量和日常生活压力。 以下是一些可能有帮助的建议： - 睡前尽量放松自己，可以尝试冥想、听轻音乐、泡个热水澡等方式。 - 睡前避免使用电子设备，因为它们会刺激大脑，使你难以入睡。 - 日常注意减压，可以尝试运动、瑜伽等放松身心的活动。 - 如果你认为自己的梦境与日常生活密切相关，可以尝试用日记记录下来，帮助你更好地理解和处理自己的情绪和压力。 如果以上建议无法改善你的情况，建议向专业心理医生寻求帮助。
每当我一个人呆着的时候，就会想起以前发生的一切，每一件事都会让我觉得很痛苦	这听起来像是你在经历一些情感上的困扰。有时候我们会陷入过去的回忆中，特别是当我们处于孤独的状态时。但这并不是什么罕见的情况。以下是一些建议帮助你摆脱这种困扰： 1. 专注于当下。当你发现自己陷入思考过去的时候，尽量努力专注于当下。聚焦于你身边的事物，比如你看到的景象，听到的声音和感觉到的气味。这样有助于让你的思维和情绪回到当下。 2. 手写日记。写下你内心的感受和情绪，以及你想解决的问题。这有助于你发泄情绪，并让你更清晰地思考解决问题的方式。 3. 寻求支持。与朋友、家人或专业人士谈话能帮助你缓解心理困扰。在交流中，你可以分享你的感受和情绪，同时寻求建议和支持。 4. 培养健康的生活方式。在日常生活中多加运动、健康饮食、良好的睡眠等习惯有助于改善身体和心理上的健康。 最后，记住，重要的并不是你过去曾经经历过什么，而是你如何能够在当下和未来中做出健康的选择和决策。
当我看到自己的身材，我觉得自己好丑，好糟糕	我理解你的感受。很多人都有这种感觉。但是，请不要过分追求完美的身材，因为每个人的身体都是独特的。重要的是要保持健康的生活方式，包括多吃水果和蔬菜，少吃高热量的食物，多进行身体活动和锻炼。同时请记住，外表不是衡量一个人价值和吸引力的唯一标准。重要的是要关注内在美和个性特点，这才是你真正的优点。
我有自闭症，我不知道如何和别人交流，我感觉自己被孤立在一个完全不同的世界里，我感到非常痛苦和无助。	作为你的助手，我想帮助你尽可能地缓解你的痛苦和无助感。首先，我想告诉你，你不是一个人。许多人都有自闭症，而且很多人都面临着与社交互动时的困难。这些困难可能会带来不适和挫败感，但它们并不是你的错。 有一些技巧可以帮助你更好地与人交流。 做准备并提前规划可以提高自信心，找到可以讨论的话题或准备好回答常见的问题可能有助于你在社交场合中更放松自如。在和人接触时，试着保持眼神交流，并回应他们的肢体语言。如果你感到紧张或不安，可以找个角落或一些私密场所稍作休息。理解那些不了解自闭症的人所需的信息，并在适当的时候向他们解释你的情况，也可能会有所帮助。 最后，我强烈建议你寻求专业的帮助和支持。认知行为疗法和社交技能训练等治疗方法可能有助于你更好地理解交流和人际互动的原则。同时，加入自闭症社区，和那些和你有相似经历的人交流，可能为你提供情感上的支持和理解。 请记住，你不是孤独的，让自己不断成长和发展是非常…
我曾经被朋友背叛过，这件事让我很受伤，我开始怀疑人性和友情的可靠性，甚至开始自我封闭和疏远他人	很抱歉听到这件事对你造成了伤害。被朋友背叛的感觉确实是非常痛苦的，但是我们不能因此就一直抱有疑虑和怀疑。 首先，不要把所有的人都归为一类，因为每个人都是独立的个体，每个人的行为和想法都是不同的。不要因为一些人的行为就彻底失去信任，这样只会让你更加孤独和不安。 其次，友情是需要建立在信任和了解的基础上的，建立强大的友情关系需要时间和相互理解。不要把所有人都排除在外，你可以尝试与其他人建立新的友谊，同时也要保持心态的平静和开放。 最后，如果你无法自己从这种痛苦的经历中走出来，也可以考虑寻求专业帮助。与心理医生或辅导员谈话可能会有所帮助。
当今社会，经常有人因为无法完成工作而自暴自弃，甚至自杀。	是的，这是一个非常严重的问题。现代社会的高压和竞争使得许多人感到很大的压力。同时，一些人可能缺乏必要的资源和支持来应对这些挑战，导致他们处于一种无法解决的困境中。为了预防这种情况的发生，我们建议人们寻求帮助和支持，包括寻求专业的心理咨询服务，对自己和他人保持积极、乐观和恒心，并尝试创建一个平衡和健康的生活方式，这有助于使人们更加强大和应对一些挑战。
我总是在想自己的过去和未来，为此感到焦虑和不安，不知道该怎么应对。	感到焦虑和不安是很正常的，尤其是当我们回顾过去和考虑未来时。以下是一些可能有帮助的建议： 1. 记得呼吸：当你感到紧张和焦虑时，要记得停下来，深呼吸几次，以帮助自己冷静下来。让自己的呼吸变得缓慢、深沉和有力，有助于减轻身体和心理上的压力。 2. 关注当下：一些焦虑感来自对我们无法控制的未来的担忧，或对已经过去的事情的后悔。多花些时间意识到当下的生活和周围的事物，并尝试专注于此时此刻，而不是被不知所措的情绪缠绕着。 3. 思考积极的可能性：当你思考未来时，让自己探索各种可能性。尝试以一种富有创造性、乐观的方式思考：如果你能想到一个不错的方案，那么为什么不去尝试呢？重要的是，我们想要让自己意识到，我们的未来还拥有很多可能性，我们有许多可以达成目标的途径。 4. 接受并克服过去的挫折：我们都会犯错，并偶尔失败。当事情并不如我们所愿时，让我们更成熟，更有智慧。思考过去的教训，找到哪些方面需要改进…
每当我面对一大群人，我总觉得自己很尴尬	面对群体感到尴尬和不自在是很常见的感受。以下是一些可能有帮助的建议： 1. 认识到大多数人都会在类似的情况下感到不自在，你并不孤单。 2. 练习和熟悉要说的内容。通过练习，你可以更加自信地表现自己。 3. 注重你的肢体语言。站稳脚跟，保持正确的姿势，避免交叉手臂或者其他紧张的姿势。 4. 考虑提前和一些人交流，并试着与他们建立联系。这会让你更舒适，更有信心。 最重要的是，要持续练习并利用每次机会来提高自己。
我对自己的外貌不满意，总觉得自己很丑，这让我对社交和交友都非常不自信，我该怎么扭转这种心态	首先，需要明确的是，外貌并不是一个人全部的评判标准。每个人都有自己独特的美丽之处，美丽并不仅仅来自于外表，还有内在的素质和个性，这些都是值得珍视的。 其次，改变自己的心态需要付出一定的努力。你可以从以下几个方面入手： 1.积极寻找自己的优点和特长，尤其是那些与外貌无关的方面，如聪明、善良、有趣等等，意识到自己的价值。 2.不要过于比较自己和别人的外貌，每个人都有自己的长相，也有自己的美丽之处。要学会欣赏别人的美而不是嫉妒。 3.锻炼身体，保持良好的饮食和作息习惯，这会让你的身体健康美丽。 4.学习化妆和穿衣搭配，这可以帮助你更好地展现自己，增加自信心。 最后，对待自己要有耐心和宽容，不要让外貌成为自己成长和发展的绊脚石。相信自己的潜力和价值，积极地面对生活和人际关系，让自己成为你想要成为的人。
我对未来充满了恐惧和不安，不知道自己该如何应对未来的挑战和压力。	首先要明确的是，每个人都会对未知的未来感到担忧和不安，这是一种正常的情绪反应。在面对未来的挑战和压力时，最重要的是要保持积极乐观的心态，并且采取实际的措施准备未来。 以下是一些应对未来挑战和压力的建议： 1. 建立健康的生活方式，包括健康饮食、充足的睡眠和适量的运动。 2. 学习新的技能和知识，以应对未来的变化和挑战。 3. 制定明确的目标和计划，并采取实际的行动来实现这些目标。 4. 与身边的人建立良好的关系，寻求支持和帮助。 5. 寻求专业的帮助和咨询，如心理治疗或职业指导。 最重要的是，不要让担忧和不安占据你的思维，而是专注于自己可以控制的事情，并采取积极主动的行动来准备未来。
我发现自己经常陷入无法停止的思维循环中，反复思考同一个问题或情境，无法自拔，导致睡眠质量下降和日常生活受影响。	这可能是由于焦虑或压力导致的强迫性思维，这种思维循环可以很难控制，但是有一些策略可以帮助你减轻这种影响。以下是一些可能有用的技巧： 1. 分散注意力：尝试转移注意力，做些你感到愉悦的事情，比如听音乐、阅读书籍、看电影等等。 2. 练习冥想：冥想可以让你慢慢减少对思维的控制并减轻压力。尝试一些简单的呼吸练习或冥想节目。 3. 寻求帮助：如果这种困扰持续存在，你可以寻求专业心理治疗师的帮助。他们可以提供一些策略来帮助你降低焦虑水平和控制思维。 4. 反思：思考你内心的情感，识别你那些思维举止，比如哪些行为会让你陷入思维循环，制定应对措施。 希望这些技巧能够帮助你克服强迫性思维，使你的生活更加健康和平衡。
我曾经经历过一些创伤性的经历，这些经历一直困扰着我。我感到自己难以处理这些情绪和回忆，这导致我的心理健康状态逐渐恶化。	首先，感谢您与我分享您的经历。处理创伤的过程可以是长期的，但是重要的一步是认识到自己需要帮助，并寻求专业支持。 我建议您考虑选择一位心理健康专业人士，例如心理医生或心理治疗师，与他们讨论您的创伤和您正在经历的情绪。您的专业治疗师可以教你如何应对和处理您的创伤，并提供工具来掌控您的情绪。他们可以帮助您建立适应性技能和策略，以帮助您克服这些具有挑战性的经历。 此外，参加支持小组或与您信任的好友或家人分享您的心理困扰也是一个不错的建议。 坦诚地展示自己可能有助于缓解内心深处的压力。 最后，确保您照顾好自己的身体健康。通过定期锻炼、睡眠充足、建立稳定的生活方式等措施，以帮助自己缓解压力和焦虑感。
我经常感到沮丧和消沉，失去了生活的乐趣和动力，对未来没有信心，这种情绪让我感到非常痛苦和无助	我很抱歉你正在经历这种困难时期，这很常见，很多人都会经历这样的情绪波动。以下是一些可以帮助你克服这种情绪的建议： 1. 寻求支持：找到你信任的人，与他们分享你的情绪和感受。这可以让你感到支持和理解，也能够带来改善情绪的效果。 2. 保持积极状态：尝试专注于积极的事情，并积极提高自己的情绪，如运动、社交、学习新技能或兴趣爱好等。 3. 寻求专业帮助：如果你已经尝试过许多方法却无效，可以考虑寻求专业心理治疗帮助。 4. 睡眠和饮食：睡眠和饮食对情绪起着至关重要的作用。保持良好的作息和均衡的饮食，可以帮助你提高情绪和精神状态。 请不要忘记，你不是独自面对这些情绪，任何人都可能经历这种情况。坚定地面对情况并寻求支持，你将可以逐步改善自己的状态。
最近，他们的孩子常常发脾气，甚至破坏房屋里的物品，可能是抑郁症的症状	这是一个很严重的状况，家长应该引导孩子寻求专业医生的帮助。抑郁症不仅仅是情绪低落，还可能导致破坏行为。您可以鼓励他们去看一名儿科医生或心理医生，以便获得正确的诊断和治疗建议。家长可以提供支持和理解，帮助孩子渡过这个难关，并鼓励他们接受治疗。
我经常感到压力和焦虑，即使是小事也会让我感到不安和紧张，很难放松和享受生活	我可以理解您的感受，有时候我们会面对一些让我们感到不安或者焦虑的事情。以下是一些建议，或许可以帮助您缓解压力和焦虑情绪： 1. 深呼吸。 每当您感到紧张或焦虑时，可以找到安静的地方，进行深呼吸练习。您可以尝试在吸气和呼气时慢慢地数数，这样有助于进一步放松身心。 2. 找到放松方法。 每个人的放松方式都不同，可能是听音乐、阅读、进行瑜伽或者冥想等等。您可以尝试不同的方法，找到适合自己的方式。 3. 从事运动。 无论是慢跑、骑车、游泳或健身，运动都是缓解压力和焦虑的好方法。运动会释放身体内的压力，并促进身体和心理的健康。 4. 寻求帮助。 如果您感到压力和焦虑情绪越来越强烈，难以自行缓解，可以考虑寻求专业帮助。例如心理咨询师、心理治疗师或精神医生等等。 5. 建立正面思维。 为了减少不必要的压力和焦虑，我们需要学会给自己正面的评价和鼓励。我们可以尝试每天给自己一条正面的建议或鼓励，这样有助于…
我对自己的身体感到很不满意，总是觉得自己太胖或者太瘦，也不知道该如何接受自己的身体	首先，要知道每个人的身体都是独一无二的，每个人都有独特的外貌和形态。接受自己的身体是一项需要时间和努力的工作，以下几点可能会帮助你： 1. 不要过度关注体重：体重并不是衡量身体健康的唯一标准。你可以关注更重要的方面，例如锻炼和饮食习惯。 2. 做出积极的生活方式调整：有一个健康的生活方式可以帮助你对自己的身体感到更好。这包括每天锻炼、饮食均衡等。 3. 寻求支持：要和身边的人分享你的感觉。亲近的人可以提供帮助和支持，帮助你走出困境。 4. 学会爱自己：学习关注自己的优点，感受自己的身体，注意自己的情感健康，做一些让自己开心的事情。这些神经心理调整可以帮助你更好地接受自己的身体。 最后，记住接受自己需要时间和耐心，但只要你能够持续不断地学习和努力，你一定会接受自己的身体，并且变得更加自信和自豪。
我对自己的表现和能力缺乏信心，总是觉得自己做不好，怕失败怕被别人嘲笑	这是一种很常见的感觉，很多人都会有这样的担忧和焦虑。但是，你需要明白的是，每个人都有自己的优点和弱点，无论是谁都会犯错和失败。失败并不是一件可怕的事情，它还可以帮助我们成长和进步。 如果你对自己的表现和能力缺乏信心，可以试着做以下几点： 1. 相信自己：相信自己能够做好事情，相信自己有能力克服困难，这样才能给自己带来更多的信心和勇气。 2. 实践和经验：尝试去做一些新的事情，探索自己的能力和潜力，通过不断的实践和尝试，可以获得更多的经验和知识。 3. 学会接受失败：失败并不可怕，学会接受失败，总结原因，找到问题所在，改正错误，再次尝试。 4. 寻求帮助：如果你仍然感到不自信，可以寻求他人的帮助和支持，和朋友，家人或者心理咨询师谈谈，寻求帮助和支持。 总之，要相信自己，不要害怕失败，不要害怕探索自己的潜力。与此同时，也不要忘记向他人寻求帮助，质询和支持。
我的情绪起伏很大，时而非常兴奋，时而又非常低落，没有任何规律可言。	听起来你可能正遇到情绪波动严重的问题。首先，我建议你试着找出导致这些情绪波动的原因。你是否最近经历了一些特别紧张或焦虑的事情，或者是有一些未解决的问题困扰着你？ 另外，你可以尝试通过一些自我调节的方法来控制情绪波动，比如深呼吸、冥想或其他放松技巧。你还可以考虑寻求专业帮助，比如心理咨询或治疗，以帮助你更好地管理情绪。重要的是要记住，情绪波动是正常的，但有时可能需要帮助才能控制它们。
当我在人群中时，我总是觉得自己被大家忽视了，甚至觉得自己不存在，这让我感到非常孤独和失落	听起来你正在经历一些社交焦虑的问题。这是一种普遍的情感，很多人都会面对类似的挑战。请不要太担心，下面有一些建议，希望能对你有所帮助。 首先，尝试改变你的想法。你可能会认为，大家都没有注意到你，但实际上可能只是你的想法在影响你的感受。谨记，你的存在和价值是不可替代的。 其次，尝试寻找到更有趣的活动来参加，例如参加课程、运动、俱乐部或者志愿者组织等。通过这样的活动可以结识更多的人，并且具有共同的兴趣爱好可以轻松展开交谈。 还有一种方法是主动与他人进行沟通，可以是与陌生人一些轻松而友好的交谈，例如问候、道歉或者评论天气等等。通过这样小小的交流，可以增强自己的自信心和社交能力。 最后，如果你感到忧虑的程度非常严重，也可以考虑寻求专业的心理咨询师或者医生的帮助。他们可以为你提供更多个性化的建议和支持。
我经常感到自己不够好，无法获得别人的认可和尊重	这是很常见的感觉，但是也可以通过一些措施来改变它。首先，你要明确自己的价值和优点。每个人都有自己独特的特点和技能，你需要发掘自己的优势并为此感到自豪。 其次，你可能需要学习如何与他人建立联系和沟通。这可能需要一些时间和练习，但是通过思考自己在与他人交流时的表现，你可以逐步改善自己的沟通技能。 最后，记住，自己的价值不是由别人的认可和尊重所决定的。尽管得到他人的赞许很重要，但你仍然可以自己认识到自己的重要性，并以此为基础塑造自己更积极的心态。
我对未来感到迷茫和无助，不知道该往哪个方向发展，这让我感到很焦虑和不安	首先，不要太担心，感到迷茫和无助是非常正常的。有时候我们需要花费一些时间来寻找我们想要的事情和方向。以下是一些可能有用的建议： 1. 探索自己的兴趣爱好：尝试新的活动或兴趣爱好，找出你最喜欢的事情，并看看它们是否能够转化为职业。 2. 向身边的人求助：与家人，朋友或导师沟通，看看他们是否有关于你未来发展方向的建议。 3. 参加职业咨询或个人发展课程：这些课程可以帮助你更好地了解自己，发现你最擅长的事情，并为未来做好准备。 4. 实习或志愿服务：通过参与实习或志愿服务，你能够获取实际经验，并帮助你了解自己是否对某项职业感兴趣。 5. 给自己时间：有时候我们需要花些时间来探索和尝试不同的事物，才能找到自己真正想要的方向。不要着急，给自己一些时间和宽容。 记住，迷茫和无助并不意味着失败，每个人都会面临类似的挑战。重要的是不要放弃寻找自己的目标和方向。
我总是担心自己的行为和决定会受到他人的批评和否定，这让我感到非常不安和沮丧。	这种感觉是很常见的，很多人都会有类似的担忧和不安。但是，你需要知道，你的行为和决定是属于你自己的，你有权利做出自己认为正确的选择。虽然可能会有人对你的行为或决定提出批评，但这并不意味着你的选择是错误的。 建议你试着更多关注自己内心的想法和感受，尝试去接受自己的选择。同时，也可以从别人的反馈中汲取经验和教训，以便更好地做出未来的决策。最重要的是，你需要相信自己的能力，相信自己可以处理任何可能出现的困难和挑战。
我想要自杀，但我又不敢，我只想把自己藏起来，永远不再出来	如果你有紧急的自杀念头，应该立即寻求帮助。请你与当地的紧急救援或者自杀热线联系，他们会向你提供支持和帮助。 如果你只是想消失，不想再面对困难和挑战的话，这也是理解的。但是，我想提醒你这不是一个解决问题的好办法。我们都有不好的时候，但这些时候过去了以后，我们可能会感到更加坚强。如果你能够试着面对自己的问题，并且找到适当的支持和帮助，你的问题和困难有可能会变得更容易解决。 如果你愿意分享更多的信息和感受，我们愿意帮助你寻求更多的可行建议。
我的家人经常批评我，让我感到很受伤，我不知道如何跟他们沟通，他们对我来说已经变得很遥远	很抱歉听到这样的情况。在这种情况下，沟通可能是解决问题的关键。以下是一些可能有助于改善你与家人之间沟通的建议： 1. 试图保持冷静，不要对批评感到过度情绪化。当你被批评时，可能会遭受不公正的攻击，这可能会导致你产生情绪上的反应。但是，在这种情况下，你需要记住保持冷静，并谨慎回应。 2. 尝试创造一个安全的社交环境。让你的家人知道，你理解他们的忧虑和担忧，并且愿意听取他们的建议，但是你也需要让他们知道，你希望他们以建设性和尊重的方式来表达自己的看法。 3. 给予你的家人尊重和倾听。尽量不要中断他们，也不要让自己的情感控制沟通过程。当你倾听他们时，让他们感受到你正在认真倾听他们的想法，并且希望他们了解你的看法。 4. 尝试一些解决问题的方式。如果你和你的家人都意识到了沟通的问题，并且都想要解决它们，那么可以尝试一些解决问题的方法，例如在决策过程中制定一个共同目标，或者用一些新方法来沟通。 最…
我常常因为一些小事而感到沮丧，难以从情绪低谷中恢复过来，感到自己一无是处。	感觉沮丧时很正常，但是我们需要努力让自己从情绪低谷中走出来。这里有一些建议可以帮助你： 1. 意识到自己的情绪：识别自己的负面情绪，例如沮丧、焦虑或愤怒，并认识到它们为什么会出现。 2. 接受自己的情绪：意识到情绪是生命中的一部分，不是错误或缺陷。 3. 找到支持：和家人、朋友或心理专业人员聊聊，分享你的感受可能是很有帮助的。 4. 培养自己：尝试新的、让你感兴趣的事情，例如追求一个新的兴趣爱好或学习新技能可帮助你激发新的启发和动力。 5. 睡眠和健康：为自己设定一个良好的睡眠和饮食习惯。保持健康的身体自然会使你的情绪更加稳定。 最重要的是，要耐心对待自己，并明确认识到从情绪低谷中走出来需要时间和努力。反复尝试和寻找对自己有效的方法（例如自我放松、冥想或运动），并且要逐渐培育积极的、对自己有益的思维方式。
我曾经被同龄人欺负，这导致我长期有着自卑和害怕被拒绝的感觉。	很抱歉听到你曾经受到同龄人的欺负。这种经历可以对一个人的自尊心和信心造成很大的影响。 首先，我建议你寻求帮助。你可以找到心理咨询师或许可医师，与他们讨论你的经历和情感问题。他们可以帮助你理解自我认知和缓解你的负面情绪，提高你的情感健康。 其次，你可以尝试加入社交团体，向外扩展自己的社交圈。可能会有一些挑战，但与人的互动是非常重要的。当你向外扩展自己的社交圈时，你将有机会认识到更多的人，并可能建立更深刻的、有意义的友谊。 最后，记住要关注自己的内心声音。尝试向自己灌输积极的信念和理念，重点提供自我肯定、自我接纳和自我关怀，这将有助于缓解自卑感和惧怕拒绝的情绪。
最近我总是感到自己的情绪波动很大，有时候很开心，有时候却无缘无故地沮丧，这让我感到很困扰，我不知道自己是不是患上了抑郁症。	情绪波动是一种常见的生理和心理反应，但如果这种情况经常出现并持续不断，就可能需要进行一些措施来应对了。根据你的描述，你可能正在经历情绪失调的情况，但并不一定患上了抑郁症。如果你感到很困扰，我建议你尽快寻求专业的心理帮助。专业心理医生可以帮助你诊断和治疗情绪失调问题，并且帮助你更好地理解自己的情绪和思维模式，让你更好地管理和控制自己的情绪。
我的压力非常大，我感到自己快要承受不了了，我经常会感到心慌或者呼吸困难。	听起来您正在经历焦虑或压力过大的情况。在这种情况下，有一些事情可以帮助您缓解压力： 1. 深呼吸或冥想：慢慢地深呼吸会帮助您放松身体和心灵。深呼吸可以减缓心率和呼吸率，从而使您感到更加放松。 2. 寻找支持：与家人和朋友分享您的感受，让他们帮助您减轻一些负担。有时候，与心理学家或治疗师谈论您的难题也可以是一个很好的选择。 3. 运动和休闲活动：运动可以释放身体积累的压力，同时增加身体的活力。另外，许多休闲活动如阅读、绘画或听音乐等也可以减轻压力。 4. 做好时间管理：当您拥有一个良好的时间表并设定优先事项时，您可以更轻松地处理生活中的压力。 5. 减少咖啡因和酒精：咖啡因和酒精都是在心理上和身体上增加压力的刺激物。减少这些刺激物的摄入可以帮助您更好地处理压力。 如果这些方法仍然不能帮助您减轻压力，请考虑咨询专业的心理健康工作者，他们可以帮助您探索更适合您的方式来缓解压力和焦虑。
我经常有焦虑和恐惧的感觉，不知道来自哪里，有时候甚至连呼吸都变得困难。	感到焦虑和恐惧是很常见的情绪，而且这些情绪可能有很多种原因。有时候它们可能是由于外部事件，如工作压力、人际关系问题、或突发事件等。而有时这些情绪也可能源于内部因素，如生理问题、心理问题等。无论是什么原因引起的，它们都会让人感到不舒服和困扰，但是你可以采取一些方法来缓解这种感觉。 一些方法包括： 1.深呼吸。深呼吸可以帮助你放松身体和放松你的大脑。深呼吸也可以帮助你降低心率。 2.让自己放松。你可以尝试做一些身体放松的练习，如瑜伽或渐进性肌肉放松。 3.寻求支持。可以找一个可靠的朋友或家人，把你的感受告诉他们，和他们一起分享你的焦虑和恐惧。 4.面对你的恐惧。不断逃避你的恐惧会让它们变得更糟。相反，你可以尝试面对你的恐惧，并逐渐接受和克服它们。 5.保持积极乐观的态度。培养容忍、理解和自己的同情心，也让自己的内心保持积极乐观的态度。 这些方法可能有所帮助，但如果你的焦虑和恐惧问题比较严重，…
我一直都觉得自己没有价值，觉得自己不够好，不够聪明，不够漂亮，这让我感到很沮丧	听起来你正在经历自我怀疑和自我否定的情感。这些感受是很常见的，但你需要认识到它们并不代表你的真实价值和能力。 首先，你需要明白每个人都是独一无二的，在世界上都有自己独特的价值和贡献。不要试图和他人比较，因为那只会让你感到更加不安和焦虑。 其次，你可以尝试一些方法来提升自信心，如寻找自己擅长的事情并专注于它们，或者挑战自己去尝试新的事情。也可以尝试积极思考，告诉自己“我能行”或“我是有价值的”等正面语句，这有助于积极向前。 你也可以找到好友或家人聊天，分享你的感受，他们会帮助你找到自信和勇气。最终，不要忘记，你是独一无二的，你的存在本身就有价值，你可以在生活中做很多事情，创造属于自己的未来，加油！
我总是有自杀的想法，我感到生命没有意义，自己没有价值。我也感到很绝望，觉得自己的未来没有希望	这听起来像是很严重的情况。我建议您与心理医生或训练有素的心理健康专业人员寻求帮助。他们可以帮助您处理这些思维和情绪，提供有效的治疗，让您重新获得自信和重建生活。同时，您可以联系当地的紧急求助热线或机构，寻求紧急帮助，如国家心理卫生热线（12320）、公益组织一线生命线（400-120-1207）等。希望您能够坚强起来，有勇气面对并处理问题，不要独自承担这一切。
我经常感到自己的生活毫无意义，我不知道自己为什么要这样活着，我感觉自己没有目标、没有动力，就像是在虚度光阴，我觉得自己没有价值	听到你对生活的无助感到非常难过。如果你觉得你的生活缺乏目标和动力，那么你可以开始思考一下自己的兴趣和激情所在。这可能需要花费一些时间来探索自己的感受，但探索的过程是很值得的。以下是一些可能有帮助的建议，希望对你有所启发： - 做一些自己喜欢但长时间没有做的事情，这可能会让你重燃激情。 - 给自己设定一些小的目标，让自己感到有成就感。 - 找一些志同道合的人，建立联系和交往，这有助于你感到自己的存在和价值的重要性。 - 寻求专业支持，例如一位专业的心理医生或辅导员，他们可以帮助你发现自己的优势、激励和目标。 记住，任何人的生活都可能经历坎坷，重要的是如何走出来，并寻找到自己的动力和意义。希望这些建议对你有所帮助，祝福你早日找到属于自己的生活意义。
我最近一直感到压力很大，因为我工作量很大，每天都需要处理很多任务，但是我却没有什么成就感，这让我感到非常沮丧，我该怎样应对这种心理压力？	您可以试着采取以下行动来应对这种心理压力： 1. 分解任务：将庞大的任务分解成小部分的子任务，每完成一项任务，给自己一点成就感。 2. 制定计划：对于每天的工作，您可以制定一份计划，有明确的时间安排和任务分配，以便更好的规划您的时间和工作量。 3. 求助他人：若您遇到了难以解决的问题，可以向同事、上司或专业人员寻求帮助和建议。 4. 休息放松：保持良好的作息和充足的睡眠是减轻压力的重要因素。在工作之余可以进行一些心理放松训练如呼吸深度训练、冥想等来舒缓压力。 通过以上方法，您可以更好地应对工作压力，提高工作效率并获得成就感。如果情况依然无法缓解，不妨考虑与专业的心理咨询师交流，获取更专业、针对性的帮助。
我经常会感到焦虑和紧张，觉得自己无法应对生活中的各种压力和挑战。	对于这种情况，我建议您可以尝试以下方法来缓解焦虑和紧张： 1. 深呼吸：尝试通过深呼吸来放松自己，将自己的注意力转移到呼吸上，让身体和大脑得到一些放松。 2. 运动：适度的运动可以释放身体内的紧张和焦虑，让自己更加放松。 3. 心理疏导：可以找一个信任的朋友或者家人倾诉自己内心的想法和感受，让自己得到一些情感上的支持和安慰。 4. 改变思维方式：有时候焦虑和紧张是因为我们的思维方式不正确，可以试着从另一个角度思考问题，让自己更加冷静和理性地分析问题。 5. 寻求专业帮助：如果上述方法仍无法缓解焦虑和紧张，可以考虑寻求心理医生的帮助，他们可以通过专业的方法来帮助您缓解焦虑和紧张。
我的内心充满了负面情绪和自我怀疑，我不知道如何摆脱这种状态	感到焦虑和负面情绪是人类常见的情绪状态，而且每个人都会经历它们。下面是一些建议，可以帮助你减少负面情绪并提高自信心： 1. 意识到你的感受：在情感和情绪上保持开放和接受忧郁的感觉，这更有助于能控制呢提高情绪的稳定性。 2. 睡眠充足：睡眠对于身体和心理健康都非常重要，保持健康的睡眠习惯可以改善自我怀疑问题。 3. 制定目标：设置可行的、有意义的目标，让自己有目的感和成就感。 4. 学习放松的方式：学习各种放松技巧，如冥想、呼吸技术和瑜伽等，来帮助你减轻焦虑和负面情绪。 5. 打破孤独：花时间和爱你的人一起，一两个最好的朋友可以充分满足你对陪伴的需求，去交朋友，与别人分享自己的故事。 6. 多进行锻炼：运动会让你的大脑释放出多巴胺，这是一种让人感到快乐和满足的神经递质。 以上是一些值得你尝试的方法，它们可以帮助你减轻负担和改善你的情绪状态，但是还是建议找到一个专业心理咨询师或医生，他们会提…
我觉得自己的情绪越来越不稳定了，有时候会情绪低落，有时候又会情绪激动，不知道是不是心理出了什么问题。	您好，您描述的这种情况有可能是心理方面出了一些问题，但也有可能是身体方面的问题引起的。建议您去看一位心理医生或心理咨询师，他们有丰富的经验和专业知识，能够帮助您分析情况，并进行心理辅导，减轻症状。同时建议您保持健康的生活习惯，例如规律的作息时间、健康饮食以及适量运动等，有助于改善身体和心理状态。
小孩放学回家，家里冷冰冰的，从来不接受他的好意，只有他有过犯错，内心空落落的，担心的是，自己长大后，会不会也变得像父母一样	这是一个很真实的问题，我们的父母往往会影响我们成年后的行为和思维方式。但是，你的担心并不一定会成为现实。你可以通过自己的努力来改变你的思考方式和行为。 首先，你可以尝试和父母沟通。告诉他们你的感受，希望他们能够更加理解你。如果他们没有意识到他们的行为对你造成了影响，这次的沟通可能会改变他们的想法。如果沟通无法起到作用，那么你可以考虑寻求外界的帮助，比如找一个心理咨询师来帮助你处理这个问题。 同时，你可以通过阅读、学习和社交等方式来多方面的影响自己的思维方式。与积极、乐观的人交往可以帮助你增强自己的信心和能力。而阅读有关成功和积极心态的书籍则可以帮助你塑造积极的思想，并更好地处理生活中的问题。 总的来说，你的父母的行为不应该成为你的锚，你可以通过努力和改变来成为你自己的主宰。
他几乎每晚都睡不着，睡不着也没有办法睡着，心情也变得越来越糟糕，又担心自己会不会有抑郁症，或者有其他什么更严重的心理问题	这位朋友的情况似乎需要关注一下他的精神健康。长时间的失眠会导致心理问题的加重，如焦虑症、抑郁症等。我建议他去看心理医生或精神科医生，他们可以进行全面的诊断和评估，并给出相应的治疗建议。在等待医生的预约期间，他可以尝试一些自我舒缓的方法，例如深呼吸、冥想、练习瑜伽、听轻松的音乐、冷热水交替浸泡脚等，有助于放松身心。
最近总是觉得自己不堪一击，思绪像乱绳子一样，无法把握	我理解你的感受，这种情况可能会让人感到无所适从。以下是一些可能有帮助的建议： 1. 放松自己。休息是最好的调节方式。当你感到紧绷或疲劳时，花一些时间放松自己，尝试一些冥想、深呼吸或瑜伽练习，有助于清空思维。 2. 制定一个计划。把要做的事情写下来，并制定一个清晰的计划来完成它们。每次完成一个小任务后，你会感到更有自信和动力去完成下一个任务。 3. 寻求帮助与支持。不要害怕向他人或专业人士求助。朋友、家人或心理医生可以给出建议和支持，帮助你重新找回自信。 4. 练习自我关爱。维持一个健康的生活方式和寻找适合自己的爱好可以提高自信心。饮食健康，有规律的锻炼有助于精神和体力上的提升。 5. 接受自己的缺点并努力改善。所有人都有缺点，这是无法避免的。给自己一点宽容和耐心，努力去学习和改善缺点，使自己更加成熟和自信。 希望这些建议可以帮助你找回自信和积极的状态。
每次我想到我的失败，我就感到无助，想到我没有被社会接纳，我就失去了勇气，想到我可能无法实现自己的梦想，我就觉得无助无药	对于这种情况，我想给您一些建议。首先，失败只是一个暂时的状态，它并不代表你的全部。你可以把失败看作是一次机会，从中吸取经验教训，更好地准备下一次的尝试。其次，社会的接纳并不是你成功的唯一条件，你可以通过提高自己的技能和经验来证明自己的价值。最后，实现自己的梦想可能需要花费时间和努力，坚持不懈，相信自己并勇敢地追寻梦想，成功就会离你更近。
我的恋爱关系总是不稳定，我经常遇到情感困扰，不知道如何处理感情问题，这让我感到无力和失落。	听到这样的情况，我理解你的感觉，恋爱关系确实是一件很难处理的事情。这里有几个建议： 1. 了解你自己的需求和价值观。恋爱关系中不同的人有着不同的需求和价值观，如果你对自己的需求和价值观不清楚，就很容易在与别人的交往中迷失自己。 2. 不要轻易妥协自己的需求和价值观。有时候我们会为了去追求某个人而不顾自己的真实感受和需求，这样的妥协是不利于建立稳定的关系的。 3. 与恋爱中的伴侣坦诚沟通。坦诚沟通是建立稳定关系的重要基础，无论是面对问题还是分享心情，都需要进行沟通。 4. 接受失败和挫折。恋爱关系中的成功不是一蹴而就的，失败和挫折也是恋爱关系中难免会经历的，我们需要学会接受这些情况并从中学习。 希望这些建议可以帮助你更好地处理感情问题。
我有时候会失去控制，变得非常暴躁和易怒，甚至会对身边的人发脾气	非常理解您的情况。失去控制可能是很困扰人的问题，但是有一些方法可以帮助您控制自己的情绪。以下是一些建议： 1. 认识到自己的情绪：首先，您需要认识到自己的情绪并意识到它们的出现。当你感到愤怒或烦躁时，先停下来，深呼吸数次，让自己平静下来并开始思考。 2. 找到解决问题的方法：有时候，烦躁和易怒可能是由于某些问题而引起的。尝试找到解决问题的方法，这样您就可以摆脱不必要的压力。 3. 寻求支持：和可信任的人交流，并且告诉他们您的情绪问题，他们可以给予您支持并与您一起找到应对方法。 4. 进行放松练习：放松技巧，如深呼吸、瑜伽、冥想和渐进性肌肉松弛训练，可以帮助您缓解压力和情绪波动。 5. 寻求专业帮助：如果您认为无法自我控制，请寻求专业帮助。心理治疗和药物治疗可能有助于您控制自己的情绪，让您重获生活的掌控力。 希望这些建议能对您有所帮助。
我的工作压力很大，每天都要应对各种问题和挑战，让我感到非常焦虑，我开始失眠、食欲不振，有时候会感到无法控制自己的情绪	听到您的困扰，我理解您的感受。工作压力大是现代职场中一个很常见的问题，可以尝试以下方法来缓解： 1. 制定计划和目标：将日常工作任务列出并排定优先级，这能够使您更加高效地处理问题和任务。同时，制定目标可以让您更好地管理时间和精力，有条不紊地完成工作任务。 2. 学会放松：练习身体放松和深呼吸，可以帮助改善睡眠和缓解紧张情绪。 3. 健康的生活方式：健康的生活方式可以帮助缓解压力，包括良好的饮食习惯、适量的锻炼和有规律的睡眠。 4. 沟通和支持：与同事、家人或朋友交流问题或寻求支持可以减轻负担。 如果这些方法无法减轻您的压力和焦虑，请考虑寻求专业咨询师的帮助。
我总是无法克制自己的情绪，有时候会突然暴怒，有时候又会突然陷入沉默，让我自己都无法预测自己的行为和表现，感到非常不安和困惑	情绪控制是需要练习和提高的技能，以下是一些可能有助于帮助您克制情绪的方法： 1. 呼吸练习：当您感到情绪激动时，尝试采取深呼吸来减轻身体的紧张感和焦虑。 2. 对话自己：当您感到情绪波动时，尝试对自己进行积极，以建立更健康的自我价值观。 3. 不要情绪化作出决定：在情绪激动时做出的决定可能是不理智的，所以在情绪稳定时再做决定可能更好。 4. 找到自己喜欢的自我调节技巧：尝试深度放松，冥想或其他形式的放松技术来帮助减轻紧张和焦虑情绪。 5. 寻求帮助：如果您发现自己难以控制情绪，可以向专业人士寻求帮助来获得更完整的帮助和治疗。 当然，以上只是一些建议，具体需要结合自身情况进行调整和实施。祝您能够成功掌控自己的情绪！
我无法摆脱对过去不愉快经历的纠缠，每当我回想起那些事情，我就会感到极度的痛苦和失落。	我很抱歉听到您正在经历这种痛苦和失落。如果您感觉无法自己解决这个问题，我建议您寻求专业的帮助。心理医生和治疗师可以帮助您处理过去的负面经历，探索您的情感和感觉，并帮助您找到应对策略并建立积极的应对机制来应对这些记忆。您也可以尝试进行一些自我疗法，例如冥想，深呼吸和身体放松技巧，这些都有助于减轻心理压力和情绪问题。重要的是，您需要关注自己的心理健康，并采取正确的步骤来减轻痛苦和失落。
我经常感到孤独和无助，没有人可以倾诉我的内心世界，我觉得自己被世界遗弃了，这让我感到非常痛苦和绝望。	我能理解您所描述的感受非常痛苦和绝望。请知道您并不孤单，许多人都经历过类似的情绪和体验。我们都需要有人来倾听我们的声音，尤其是在我们感到无助和孤独的时候。 如果您需要一个倾听者，您可以找到支持和安慰的人或组织。以下是一些可能对您有帮助的资源： 1.当地卫生部门/精神卫生机构：您可以咨询当地的医生，了解一些可以提供心理健康支持的机构或资源。 2.心理咨询师：寻找专业的心理医疗师，可以提供您专业的咨询和支持。您可以在互联网上寻找当地的咨询师。 3.心理健康热线：如果您需要紧急支持或突发状况，您可以尝试打一些心理健康热线寻求支持。 4.同伴支持组织：一些组织可以为您提供同伴支持，与您分享经验，一起面对困难。 请记住，您不是孤单的。寻求帮助和支持，可以帮助您感受到更多的情感支持，重获信心并走出痛苦。
我常常因为自己的缺点而感到自卑和无助，觉得自己不够好，不值得被爱	这是很常见的情绪，很多人都会有类似的感受。但是，值得注意的是，每个人都有自己的优点和缺点。人类并不是完美的，每个人都有自己的不足之处。重要的是，我们需要接受自己的缺点并努力改进。 如果你觉得自己的缺点让你感到无助和自卑，可以尝试以下方法来帮助自己： 1. 让自己的优点发挥到极致，这样就会在某些方面得到表扬和赞赏，从而提高自己的自信心。 2. 学习爱自己，不要对自己太苛刻。要充分理解自己，了解自己的需求，自己积极寻找一些乐趣和兴趣爱好。 3. 选择正面思考，学会从积极的方面看待自己。不要把自己的缺点看成自己的全部，要看到自己的优点和潜力。这样就能更加自信地面对生活中的各种挑战。 Remember, you are a unique and valuable individual who deserves love and respect just like everyone else.
我的工作和学习压力很大，经常感到精疲力竭，但又不知道如何放松和缓解压力。	您好，相信很多人都会面临和您一样的问题。以下是一些缓解压力的方法，供您参考： 1. 深呼吸：将呼吸调整为深而慢的方式，有助于放松身体和心理。 2. 锻炼身体：运动可以释放内生物质来减少压力，例如多走路、跑步、瑜伽等。 3. 找静心活动：例如冥想、读书、听音乐等活动，让自己从快节奏的生活中得到一些放松。 4. 与朋友聚会：与亲朋好友聊聊天，或者去看看喜剧电影，享受一个愉快放松的时光。 5. 定时放松：建立一些放松的时间，无干扰地享受一些个人爱好或者只是一次静坐。 以上这些方法是我常用的方式，希望对您有所帮助。
我的情绪变化实在太快，从开心到难过只要一会儿，这是为什么？	情绪变化太快的原因有很多，例如： 1. 心理问题：有些人可能患有某种心理问题，如抑郁症、焦虑症等，这些心理问题会导致情绪波动较大或不稳定。 2. 压力和焦虑：如果你经常感到压力和焦虑，你的情绪可能会变化得很快。焦虑可能导致你的心情时好时坏。 3. 情绪面临的外界因素：情绪波动也与我们所处的环境和所发生的事件有关，比如工作、学习、家庭问题等，这些都可能对我们的情绪产生影响。 4. 身体状况：有些人可能由于身体状况不良，例如睡眠不足、营养不良等，导致情绪不稳定。 如果您的情绪变化太快，建议您找专业心理医生进行检查，并探讨进一步的治疗方法。同时，你可以试试一些放松的技巧，例如冥想、瑜伽、深呼吸等，可以帮助你控制情绪，并使你更放松和平静。
我比别人都容易失去耐心，一点小事就会觉得被无谓压抑，被逼到极限	感到失去耐心是很常见的情感体验，特别是在压力和压力下。以下是几种可能帮助您提高耐心和控制情绪的技巧： 1. 深呼吸。当你感到情绪激动时，深呼吸可以帮助你放松和冷静下来。尝试深呼吸几次，数到三或四。在呼气时注意放松你的身体。 2. 寻找支持。和亲密的人聊天可以帮助你减轻压力，让自己感觉更加镇定。试着与朋友、家人或专业人员分享你的感受。毕竟，吐槽一下总是可以让人心情舒畅。 3. 练习冥想和瑜伽。这些练习可以帮助你放松身体和心灵。逐渐培养和提高耐心的能力，本质上就是让注意力聚焦于当前的事情上，而不是被外界情绪所左右。这些练习可以帮助你把注意力放在自己的呼吸和身体上，帮助你更好地控制情绪。 4. 找到适合自己的放松方式。不同的人有不同的放松方式，例如听音乐、读一本书、看电影、散步或泡个热水澡。找到适合自己的方式，并尝试固定的时间和地点来享受它。 5. 确保充分休息。充足的睡眠和饮食是保持良好情绪…
每次想到要去看医生或者咨询心理医生，我就会感到恐惧和不安，我担心自己的问题会被暴露，被别人评头论足，这种恐惧让我无法寻求帮助。	理解你的担心和恐惧，这是非常常见的感受，很多人在看医生或咨询心理医生之前都会感到紧张和不安。但是，值得记住的是，医生们都受过职业道德和保密条款的约束，会严格保护你的隐私，并尽力提供最好的帮助。如果你的问题与身体或心理健康有关，尋求专业帮助是必要的，这将帮助你找到合适的解决方案。实际上，寻求咨询是一个勇敢的举动，你已经走出了第一步，为自己和你周围的人做出了好的决定。
我在职场上遇到了很多挫折和不公，这让我感到自己的人生非常失意和无望	听到你遭遇了这样的困境，我很抱歉。但是，我们都会遇到挫折和不公，这些是生活的一部分。重要的是如何应对这些挑战和克服它们。 首先要坚持积极的心态，相信自己有能力克服这些障碍。同时，也要承认自己的感受，允许自己感到失望和无望，并寻求支持和帮助。你可以找到一些信任的人来倾诉和寻求建议。 此外，不断学习和提升自己的能力，加强自己的竞争力，也是克服困难的重要方式。你可以参加培训课程、读书、关注行业动态等，不断完善自己的知识和技能。 最后，保持信心和耐心，坚持不懈地寻求机会和改善自己的处境，相信总会迎来转机。
我被同学歧视，有时觉得活着没有任何意义	我很抱歉听到你的困境，但我希望你知道，你的生命是宝贵的，你有价值和重要性。别人对你的态度和行为不应该影响你对自身的价值感。 首先，如果同学对你有歧视或欺凌行为，你可以主动向老师或学校咨询处寻求帮助，并让他们帮助你解决问题。学校有义务确保每个学生都有一个安全和友好的学习环境。 其次，你可以试着找到和你志同道合的人，加入社团或者参加兴趣小组。在这里你可以结交新朋友，分享你的想法和感受，这样一来你会感到更加有凝聚力和归属感。 最后，寻求心理医生或辅导员的帮助也是一个不错的选择。他们可以提供专业建议，帮助你解决问题，重塑自己的信心，重新找到生活的意义和目标。
我对自己的身体和外貌非常不满意，总是对自己进行过度的批评和否定，甚至影响了我的日常生活和社交活动	抱歉听到您对自己的负面感受。这是一个常见的问题，但需要注意的是，这种否定和不满意可能会导致严重的心理问题和健康风险。我们建议您采取以下措施来帮助自己： 1. 寻求专业帮助。心理医生或治疗师可以帮助您处理负面情绪，提高自尊心和建立自我接受。 2. 给自己一定的自由和容忍。过高的自我要求不仅会造成压力，还会导致对自己的严格评判。接受自己的不足之处，并意识到每个人都有自己的缺点，不会完美。 3. 培养积极的生活习惯。通过均衡饮食、足够的睡眠和适当的运动来促进身体健康和外貌。 4. 交际和社交。与朋友和亲人分享您的问题，与社会各界的人接触和交流，能够帮助您改变对自己的看法。 通过与他人分享，能够变得更有自信。 希望这些建议对您有所帮助。如果您需要进一步的帮助，随时可以咨询医务人员或心理治疗师。
最近我经常会感觉到疲惫无力，连爬一层楼梯都好累，我是不是应该去看医生	如果您经常感到疲惫无力，而这种感觉持续时间较长，建议您去看医生。疲劳无力可能是许多疾病的症状之一，包括贫血、心血管疾病、甲状腺问题等等。看医生可以确诊您的病因，并寻找适当的治疗方式。同时，保持良好的饮食和睡眠习惯，增加身体锻炼，也会有助于恢复健康。
我觉得自己无法控制自己的情绪和行为，经常做出冲动的决定，这是一种心理疾病吗？该怎么治疗？	您所描述的这种情况可能是情感失控障碍（Emotionally Unstable Personality Disorder）的表现之一。这种心理疾病表现为情绪波动剧烈、行为易冲动、自我认知及自我评价不稳定等症状。 如果您确实有这种情况，建议您及时寻求专业心理咨询和治疗。一般治疗方法包括心理治疗和药物治疗。心理治疗可以帮助您学习自我调节情绪和行为的技巧，认识、理解和改变自己的负面情绪、思维和行为模式等。药物治疗可以减轻情绪波动、降低冲动行为等症状。 同时，您可以尝试一些自我管理和调节情绪的方法，例如通过身体运动来释放紧张情绪，学习冥想、正念等放松技巧，逐步建立良好的生活习惯和情绪管理机制等。
把所有负面情绪压抑在心底，不准自己有一点点脆弱，可是自己内心里却抑制不住	这种情况下，您可能会感到非常困难和孤独。抑制情绪可能会对身体和心理健康造成负面影响。出于自我保护和自我控制的原因，我们可能会尝试隐藏内心的感受，但这并不意味着您必须忍受这种内心抑制的痛苦。 我建议您尝试采取以下措施： 1.坦诚面对自己的情绪：承认自己的情绪并与自己进行开放的对话。尝试了解和分析您所感受到的负面情绪，并想办法处理这些情绪，比如找到一个安静的地方，静坐几分钟，聆听自己的呼吸。 2.身体活动：身体活动有助于释放压力和负面情绪。运动可以提高身体状态，使心情变得更轻松。可以试着去散步，跑步或参加一些有趣的运动项目。 3.找到一个支持团体：与朋友或家人分享自己的情绪。找到一些能够支持您的人或社群，他们可以帮助您理解自己的情绪，并提供关键性的建议和支持。 4.寻求专业帮助：如果您感到自己无法控制或处理自己的情绪，那么请尽快联系专业人士。有一些精神健康专业人士可以帮助您管理自己的情绪，让…
我们一直争吵，每次都会吵出一些痛苦的话，然后分手了	我很抱歉听到这个消息。吵架时说出伤人的话可能是因为双方情绪激动，无法控制自己的情绪。我建议你和你的伴侣好好沟通，提出问题并询问彼此的感受，试着理解对方的想法。也可以尝试一些冷静下来的方法，例如深呼吸、走开几分钟等。如果你们已经分手了，也不要忘记自己的价值和重要性。希望你能够走出这段痛苦的经历，成为更坚强的自己。
走在街上，小张总是感到他周围的人都在窥视着自己，他的心理状态变得越来越不稳定	这种情况下，小张可能正在经历一种心理问题，称为“被关注焦虑症”。 被关注焦虑症是一种常见的社交焦虑症，患者会对周围的人的目光和评价感到过度关注和敏感。这种焦虑可能导致患者尽可能避免与他人互动，影响他们的日常生活和社交生活。 有些方法可以帮助缓解被关注焦虑症的症状，例如咨询心理医生进行谈话疗法，参加认知行为疗法或者尝试放松技巧和冥想。也可以采取些社交方式与他人交流，例如参加一些小组活动和社区活动，逐渐增加社交经验，从而缓解对社交的逃避。
我感觉自己的人际关系出现了问题，和朋友、家人、同事之间都很难沟通和交流，有时候甚至会出现冲突和争吵，这让我感到很沮丧和无助，不知道该怎样才能建立健康的人际关系	建立健康的人际关系需要投入时间和精力，以下是一些建议： 1. 建立真诚的沟通：沟通是建立健康人际关系最基本的要素。需要注意的是，要保持真诚和开放的态度，因为这样才能有效地理解和处理彼此间的需求和感受。同时，学会倾听对方说话，尽可能地理解对方的观点，避免过度解读。 2. 接纳彼此的差异：每个人都有独特的生活和思维方式，所以在彼此相处时，要学会接纳和尊重对方的差异。可以通过探讨对方不同的看法，了解他人的想法并试着从不同角度思考问题。 3. 建立信任：对于建立健康的人际关系，信任是非常重要的。尝试坦诚地和他人交流，并且遵守承诺和保密。这样可以增加彼此之间的信任和尊重。 4. 坚持积极的态度：积极的态度可以帮助您处理人际关系中出现的问题。当您面对挑战和困难时，尽力保持冷静、理智，寻找解决问题的方案，避免对问题产生情绪化的反应，避免引发更大的矛盾。 5. 学会谅解：当你和他人发生了争执，尝试多一些…
我对自己的外貌和身材感到不满意，经常自我评判和自我怀疑，这让我缺乏自信和自尊。	首先，你应该知道每个人的外貌和身材都是独一无二的，并不需要完全追求社会的标准。接下来，建议你采取积极的行动来改善自己的身心健康，例如健康饮食和适量运动，以此来塑造自信和自尊。还有，尝试关注自己的内在美和个人价值，这些财富是真正可爱的，并且会使人们更喜欢你。最后，这是一个长期的过程，要耐心地对待自己，相信自己可以不断变得更好。
我经常感到孤独和无助，好像没有人真正理解我，我觉得自己很难与人建立联系，这让我感到很困扰，很难找到解决办法	听起来你处于一种单独的、困难的境地，这让你感到压力和困扰。许多人都经历过这种感觉，你不是一个人。虽然任何人都不可能完全理解别人的经历，但有时候，与其他人交谈，发现你们有共同点，或者找到新的理解并从中获得支持是有帮助的。我建议你考虑寻求咨询师或看望心理医生，他们可以帮助你探索和理解你的内在感受，同时提供实用的解决方案，帮助你与周围的人建立联系和增强自信心。
我父母离婚后，我就一直住在外婆家里，虽然我跟妈妈住在一起，但我总是感觉她比外婆更陌生，也不知道怎么跟她沟通。	我很理解你的感受，离婚对于整个家庭来说都是一件很大的事情，如果没有得到有效的处理和解决方法，会对孩子产生很大的影响。不过，你并不是一个人，你可以通过以下一些方法来改善你与妈妈之间的关系。 首先，你可以尝试跟妈妈多沟通。你可以把你的困惑和疑虑告诉她，让她知道你的感受。她可能也会有自己的想法和感受，但是没有人能够读懂你的心里想法，只有通过沟通才能相互了解。 其次，你可以更多地与妈妈参与一些家庭活动。找一些大家都感兴趣的项目，例如看电影、做手工、烹饪等等，通过这些共同的活动增加你们之间的亲密感。你可以跟妈妈一起做饭、一起看电影，透过互动和交流，来增进两者之间的关系。 最后，你也可以去寻求外界帮助。如果你们之间的问题很严重，无论是家庭问题还是心理问题，你可以寻求专业的心理辅导师，他们会很好的为你和妈妈提供一些相应的帮助和建议。
我的失败比成功的多，越来越经常自己安慰自己以为只要努力就一定会有回报，但是现实却往往让人失望	感到沮丧和失望是很自然的，人生中失败和挫折都是难以避免的经历。但是，我们可以从这些经历中学习并成长。请记住，成功需要时机和耐心，有时候要付出更多的努力和时间才能看到回报。但是，你必须相信自己的能力和潜力，坚持不懈地努力，持续地学习和进步，也不要忘记寻求他人的支持和帮助。最重要的是，要保持积极的心态和信心，相信自己最终能够获得成功！
我有强烈的恐惧感，害怕某些事情会发生，无法让自己冷静下来	您好，感到强烈的恐惧感是很正常的，但是如果这种感觉开始影响到您的日常生活，那么您可能需要考虑一些方法来帮助您放松和冷静下来。 首先，您可以尝试深呼吸。这是一种简单而有效的放松技巧。慢慢地呼气，然后再慢慢地吸气，每次呼气和吸气均匀持续数秒钟。您可以重复几次这个过程，同时尝试放松自己的身体。 其次，您可以尝试一些冥想和放松练习。这些练习可以帮助您更加专注和冷静。您可以在网上找到一些相关的冥想视频和音频，或寻求专业的心理咨询师的建议。 此外，您也可以尝试找到一些缓解压力的活动，例如散步、看书、听音乐等。这些活动有助于您放松身心，缓解紧张和焦虑。 最后，如果您的恐惧感持续影响到了您的日常生活，您可以考虑寻求专业的心理治疗师的帮助。他们可以帮助您了解您的恐惧感源于何处，以及提供有效的治疗方案来帮助您克服它。
我觉得自己一直处于一种迷茫的状态，不知道自己想要什么，也不知道自己应该做些什么，这让我感到非常困扰，有时候会让我产生一些消极的情绪。	这种情况可能意味着你需要更好地理解自己和自己的价值观。你可以尝试回答以下问题： 1. 你的优势和弱点是什么？ 2. 你有哪些兴趣爱好？ 3. 你对生活中的哪些方面感到满意？哪些方面感到不满意？ 4. 你的价值观是什么？（例如，家庭、友情、工作，自由等） 回答这些问题可以帮助你更好地了解自己，并确定自己想要的东西。同时，你也可以尝试接触新的事物，去学习并体验不同的事物，这有助于你拓展自己的视野和丰富自己的人生经验。不要放弃，相信你能找到自己热爱的事物！
偶尔会感到心情低落，难以从负面情绪中走出来，怎样才能调整好自己的心态？	调整心态的方法因人而异，以下是一些建议： 1. 意识到自己的情绪：先要意识到自己的情绪状态，并找到造成情绪低落的原因。 2. 与他人交流：把自己的问题和感受与亲友分享。他们可能会给你一些建议或支持，帮助你走出低谷。 3. 实践积极的自我谈话：把负面的想法转化成积极的，建设性的自我谈话，帮助自己保持乐观和自信。 4. 关注身心健康：注意健康饮食，保持适度的运动，有足够的休息时间，这些都有助于提升心理健康。 5. 寻找自己的爱好：找一些自己感兴趣的事情，比如读书、听音乐、旅游等，这些活动能够缓解压力和焦虑，提升自我价值感。 6. 承认自己的进步：尽管自己感到情绪低落，也要肯定自己的努力和进步。每一步进步都是一段旅程的一部分，不要因为自己的失败而感到灰心丧气。
我总是觉得自己不够好，不够聪明、不够漂亮，常常想要把自己完美地包装起来，不让别人看见自己的缺点	首先，要明白每个人都有缺点，没有人是完美的。如果你一直隐藏自己的缺点，可能会让你更加焦虑和不安。你可以试着接受自己的不完美，而不是试图遮掩它们。这可以让你更加自信和放松。 另外，要注意多关注自己的优点和优势，不要一味地担心自己的缺点。每个人都有不同的强项和特长，通过发掘自己的优势，你可以把注意力放在自己的优点上，感到更加积极和自信。 最后，要和信任的人分享你的感受和想法，寻求他们的意见和支持。这可以帮助你更好地理解自己，获得建设性的反馈和指导，让自己变得更加坚强。
我经常感到自己的内心空虚，缺少一种真正的归属感和目标感	感觉内心空虚和缺少目标感是非常常见的。以下是一些建议来帮助您处理这些感受： 1. 确定你的价值观和兴趣爱好：找出在你生命中最重要的事情。你可以通过找出你最喜欢的兴趣爱好，你的优势，以及一些你觉得在生活中最重要的事情来找出价值观。一旦你找到了这些价值观或者兴趣，你可以更容易地将自己的时间和精力集中在这些方面，从而找到一种目标感和归属感。 2. 制定计划：当你有一个明确的计划和目标时，你就会感到更有动力和方向感。制定一个实际可行的计划，并着手实施它。无论是学习新的技能，还是参加一个社区活动，甚至是一项小的任务，当你完成这些时，你会感到自豪和有所成就感。 3. 找到社区和支持：加入一个社区，并与其他人联系，这经常会使人感到更有归属感。你可以加入一个社交团体、学习小组、志愿服务组织等等，与其他志同道合的人建立联系。同时也可以找到一个你信任的朋友或家人来谈谈你的感受。 4. 寻求专业帮助：如果你感…
每当有人和我搭讪或者夸奖我，我总是觉得他们只是在欺骗我，因为我不值得被尊重	这听起来像是一种负面的自我评价，并且可能会影响到您的情绪和自尊心。这可能是因为您的评价标准太高或者您太过于挑剔自己了。请记住，每个人都有其优点和缺点，而且每个人都值得被尊重和认可。如果您感到不舒服或者焦虑，建议您寻求专业心理医生或心理治疗师的帮助，他们可以帮助您处理这些感受，并帮助您提高自尊心和自信心。
我一直担心自己会受到别人的批评和否定，导致自己的自信心越来越低，我该怎么提高自己的自信心	首先，要明白每个人都会有得到批评和否定的时候，这是常态，不必过于在意和纠结这些事情。其次，建议你多去关注自己的优点和长处，发挥自己的个人特长和才能，这样能给自己带来成就感，提高自信心。还有，尝试跳出自己的舒适区，去尝试新的事物，挑战自己，慢慢地就能增强自信了。此外，与信任的人进行沟通交流也是很重要的，能让你得到支持和鼓励，从而更有自信去面对生活和工作中的挑战。
我不知道该怎么应对自己的情绪，常常因为一点小事就爆发，觉得自己无法控制自己的情绪，这是否意味着我有心理问题？	情绪爆发和难以控制情绪并不一定意味着您有心理问题，但是这是一种值得关注和探讨的情况。这种情况可能因为某些负面因素引起，例如工作压力、人际关系、健康问题或生活中的变化等等。这些因素可能会对您的情绪和行为产生影响。如果您认为这种情况严重影响了您的日常生活，建议您寻求专业帮助。心理医生可以帮助您探索这些问题的原因和应对方法，并提供有效的治疗。
我对未来充满了恐惧和不确定，不知道自己应该走哪条路，每天都感到十分迷茫	这很正常。许多人在面对未来的不确定性和选择时会感到困惑和恐惧。但请放心，这是一种常见的情绪，你不必感到孤单或无助。以下是一些建议，希望能对你有所帮助： 1. 确定你的目标和价值观。明确你想要实现的目标、你重视的价值观以及你的优势和兴趣。这可以使你更容易地找到适合自己的路。 2. 寻找支持。你可以寻求家人、朋友或心理咨询师的支持和建议，他们可以帮助你分析和解决问题。 3. 不要过分担心未来。注意当下，并将注意力集中在你现在正在做的事情上。担心未来不会改变它的结果，反而可能会让你感到失望和沮丧。 4. 探索不同的选择。不要害怕尝试新事物，不要害怕失败。通过尝试不同的选择，你可以发现什么适合你，并从中受益。 5. 寻找灵感和启示。阅读关于成功人士的故事、聆听成功人士的演讲、寻求职业指导等等。这些都可以为你提供灵感和启迪，帮助你找到适合自己的职业道路。 请记住，选择一条职业道路需要时间和努力，并…
我一直都有强迫症的表现，经常要反复检查门窗是否关好、电器是否关闭等等，如果不能满足这些要求就会感到非常不安和恐惧，这影响了我的日常生活和工作，我想知道如何摆脱这种困扰。	强迫症是一种常见的心理障碍，它会导致人们反复重复某些行为或思考某些想法，以便减轻内心的紧张和焦虑。如果您感到这种困扰影响到了您的日常生活和工作，建议您尽快咨询专业医生或心理医师寻求帮助。 以下是一些可能有助于缓解强迫症状的方法，但请注意这些方法并不适用于所有人，并且您必须在专业医生的指导下进行。 1.认知行为疗法：这种治疗方法可以教你如何逐渐改变自己的思维和行为，以减少强迫症状。它包括曝露疗法和反思疗法。 2.药物治疗：某些药物可以帮助减轻强迫症状。您的医生可能会为您开具处方药，如选择性血清素再摄取抑制剂（SSRI）。 3.放松技巧：深呼吸、渐进性肌肉松弛和冥想等放松技巧可以帮助你减轻焦虑和紧张。 4.锻炼和健康的生活方式：锻炼身体和保持健康的生活方式可以帮助你控制焦虑和压力，并促进身心健康。 不论哪种方法，都需要您耐心地和恒心地实践，并与专业医生密切合作。
有时候我会觉得无聊，总是不知道应该怎么做，而且也不知道自己未来会如何，感觉很空虚。	这种感觉是很正常的，这也是许多人都会经历的。首先，可以尝试找到一些新的爱好或兴趣，让自己的生活充满乐趣和挑战。此外，可以考虑参加志愿活动或社交活动，与志同道合的人交流，扩展自己的社交圈子，也可以提供更多的机会和选择。 另外，可以多思考自己的长远目标和计划，制定一些计划和目标，逐步实现自己的梦想和目标。需要注意的是，不要把自己过多压力，保持积极乐观的心态和态度，找到合适的平衡点，在生活的各个方面都能够取得更好的平衡。
一直都想要个孩子，但是怀孕后总觉得自己无法胜任做个好妈妈	怀孕后有这种焦虑是很正常的，毕竟育儿确实是一项具有挑战性的工作。不过，不要忘记，每个人都是从零开始的。当孩子出生时，你会慢慢发现自己有学习和进步的机会。 下面是一些建议，可以帮助你准备成为一个好妈妈： 1. 阅读关于育儿的书籍和文章，增加知识储备。了解婴儿的喂养，睡眠和发育进程等方面的知识可以帮助你更好地理解和照顾你的宝宝。 2. 寻找支持和建议。可以加入育儿社区，与其他有经验的父母交流分享经验，也可以向专业人士咨询，比如儿科医生，护士和心理医生等。 3. 经常和你的伴侣，家人和朋友交流，让他们参与其中。有人给你提供帮助和支持是非常重要的，也能减轻你的压力。 4. 准备好比以往更多的时间和精力。育婴确实需要大量的时间和精力，你需要调整你的工作计划和日常生活习惯，以适应你的孩子和家庭的需求。 最重要的是，相信自己。无论你是否有经验，你有一个更强烈的愿望——爱和照顾你的孩子。你会犯错误，但是…
我对自己的身体和健康总是感到担忧，害怕自己得了各种疾病，这让我感到很紧张和焦虑。	这种担忧和焦虑可能会影响你的日常生活和心理健康。以下是一些建议： 1. 寻求医生的帮助：如果你对自己的身体状况感到担忧，最好咨询医生，进行身体检查，以找出疾病的征兆。这可以帮助你排除自己担心的疾病，并提供必要的治疗。 2. 节制健康信息的获取：网络上有许多健康信息，但其中很多不可靠。挑选权威渠道，实事求是，减少无凭无据的健康谣言。 3. 健康的生活方式：保持健康的生活方式，例如饮食均衡、适度运动、定期参加体检等，可以提高你的身体健康水平，同时也可以缓解你的紧张和焦虑。 4. 深呼吸练习：当你感到紧张和焦虑时，试试深呼吸练习。这可以帮助你缓解紧张的感觉，放松身体，使你感到更平静。 最重要是要记住，担忧和焦虑并不能解决问题。采取积极的措施来保持健康并减轻紧张和焦虑是最好的做法。
我对自己的外貌和身材非常在意和挑剔，经常陷入一种无止境的自我修正和改变之中	这是一个很常见的问题，很多人都会对自己的外貌和身材有所挑剔和不满。但是，过度的关注和追求外表完美可能会对自己的心理健康产生负面影响。 首先，要明白外貌并不是定义一个人的全部和真正的价值所在。人的内在品质和个性特征同样重要，更能真正反映走向成功和快乐的真正性格。因此，不要将自己过分依附于外表，否则可能会给自己带来压力和焦虑。 其次，应该了解不同的身材和外貌都是独一无二的，拥有自己的美丽和价值。每个人都有不同的优点和特征，真正不同和独特的外貌和身材也能成为自己的亮点。每个人都应该学会接受自己的样子，并信任自己的个性和价值。 最后，值得注意的是，坚持健康的生活方式和有规律的锻炼，这一定会带来一个美好的体貌，让你感到更自信和快乐。不要太过强调完美或过度追求一种刻板模板，只需要记住健康生活是最重要的。
学习障碍是很常见的，把学习当成游戏，你可以让学习变得更有趣	是的，将学习变成有趣的游戏可以帮助那些有学习障碍的人更加积极地参与学习。以下是一些可能有用的方法： 1. 利用互动教学软件：像Kahoot或Quizlet这样的软件提供了一个有趣的方式来学习，并帮助学生更好地理解和记忆信息。 2. 利用游戏化的应用程序：一些应用程序（如Duolingo）将学习任务转化为游戏化的任务，让学习更有趣，更容易维持兴趣。 3. 利用角色扮演：通过将学生分成小组，每个小组担任不同的角色，比如英雄、反派等，然后让他们参与一个任务或挑战，可以让学生更容易地将学习过程与现实情境联系起来。 4. 利用互动讲座和工作坊：通过与学生进行实时互动，并鼓励他们分享自己的想法和观点，可以激发学生的兴趣和学习动力。 总体而言，通过创造性地运用各种方法，可以将学习变成更有趣的活动，并且有助于帮助具有学习障碍的学生提高学习效率和兴趣。
我明明很想有个人可以依靠，但不知道怎么去接近，每次尝试都会失败，然后又失去了勇气，又回到原点	首先，要明确自己需要哪些方面的支持和依靠。可能是聊天倾诉、共同兴趣爱好、学习工作上的帮助等等。 其次，可以通过加入社交组织、参加活动、加入志愿者组织等方式扩大自己的社交圈子，与更多的人交流，寻找志同道合的朋友。 另外，也可以通过社交媒体平台或者约见朋友的方式，和已经认识的人继续交流深入了解。如果遇到失败或者挫折，不要气馁，要坚持尝试，保持乐观的心态和开放的心态，相信自己能够找到合适的依靠人。
我发现我对事物的兴趣和热情越来越低，总感觉没有什么动力去做任何事情，这是不是一种心理健康问题？	是的，这可能是一种称为抑郁症的心理健康问题的征兆之一。抑郁症是一种常见的心理障碍，表现为情绪低落、无助、失去兴趣和乐趣，以及体力和思维功能下降等症状。如果您对自己的情绪问题感到困惑或不确定，建议向专业心理医生寻求帮助，以确诊并获得适当的治疗。
经常性的心理压力会影响我们情绪稳定，可能会影响我们的身体健康，我们应该做好心理素质的修炼，进行心理健康教育	非常正确。我们应该致力于维护自己的心理健康，避免长期处在高压状态下，学会放松自己，积极寻求解决问题的方法，和亲朋好友沟通，同时寻求专业的心理咨询和治疗，让自己保持平衡和健康的状态。
被人非法拘留了一晚上，折磨得浑身脆弱，一个人在角落里哭，只有泪水把黑暗照亮	非法拘留是一种违法行为，您需要及时向当地警方报案，以维护自己的权益。在此期间，保持冷静，呼吸深呼吸、缓慢呼吸放松身心，可以尝试进行冥想或听音乐放松心情，让自己保持平静。同时，也可以尝试与家人或好友联系，告知他们当前的情况并寻求支持和安慰。重要的是，不要让恐惧和绝望占据心中，相信正义早晚会得到伸张。
在青少年心理健康方面，学习如何建立健康的关系，如何正确表达自己的情绪和诉求，是非常重要的	您说得没错。青少年期是一个非常关键的阶段，他们开始发展自我认知、情感和社交技能，这些方面对于他们未来的生活质量和成功都有重要影响。建立健康的关系和正确表达自己的情绪和需求是青少年心理健康中非常重要的一部分。这可以帮助他们与家人、朋友和同龄人建立良好的关系，促进沟通和理解，从而减少压力和焦虑，并提高自尊和自信。
最近我经常做噩梦，这些梦境让我感到恐惧和不安，甚至影响了我的睡眠质量和日常生活。	我很遗憾听到您近期经历的困扰。噩梦是一种常见的睡眠障碍，它可以影响到你的情绪和日常生活。以下是一些可能会对您有帮助的建议： 1. 创建一个安静且舒适的睡眠环境，避免噪声和光线的干扰。如果您的房间在外面噪音比较大，可以考虑使用耳塞或白噪声机来帮助屏蔽噪声。 2. 改善您的睡眠习惯，例如固定的睡觉时间和起床时间，避免喝酒和咖啡因刺激等。 3. 练习放松技巧，包括渐进性肌肉松弛，深呼吸，冥想等，可以帮助您平静下来，进入更深入的睡眠。 4. 如果这些方法时间上并不能带来改善，可以考虑咨询医生或睡眠专家，以了解更有专业的建议和诊治方法。 希望这些建议对您有所帮助，祝您拥有一个更加健康愉快的生活。
我总是很焦虑，不断地担心事情的发展，尤其是一些小事情，也会让我感到不安和不舒服	感到焦虑和不安是完全正常的，但如果这种感觉持续得很久或者开始影响到你的日常生活，那么就需要采取措施来减轻和管理它。 以下是一些你可以尝试的方法： 1. 倾听自己的思维：当你注意到自己的思维变得负面或者这些思维变得嘈杂的时候，试着停下来，关注下当时的感受，写下来或与朋友讨论。这样可以帮助你更好地了解自己的情绪和思维模式，让你更容易控制自己的情绪。 2. 深呼吸：当你感到紧张或焦虑的时候，可以试着做一些深呼吸。默默数数呼吸，每次呼气时试着放松身体和思维。这有助于减轻紧张和焦虑的感觉。 3. 积极认知：让自己关注到积极的事情和人，礼物和周围的环境。享受简单的事情，像是一个美丽的日落，一只小狗的亲吻或一首悦耳的歌曲。 4. 寻找支持：有时候倾述和支持会让你感觉更好，因此不要犹豫寻找他人的支持和陪伴。可以和朋友或家人聊天，或寻求专业帮助。 记住，可以通过自我控制和做一些简单的事情来减轻和管理焦虑。…
我总是无法停止自己消极的想法，即使有时候事情并没有那么糟糕，我还是会想到最坏的结果，我感到非常沮丧和无助，觉得自己永远也无法摆脱这种情绪。	感到消极和无助是一种非常常见的情绪体验, 特别是在当前的情境下，很多人都面对这样的情况。以下是一些有用的方法可以帮助你调整自己的消极情绪: 1. 认识到自己的消极情绪。意识到你自己在消极地思考很重要，因为这可以让你开始寻找积极的解决方案。 2. 意识到你的想法只是想法。消极的想法只是你脑中的一些想法，而不是真实的事实。尝试理性地思考你的想法，并尝试从积极的角度看待事情。 3. 找到正确平衡。尝试找到一个平衡点，不要让消极的想法遮蔽了你对事情的正常评估和处理。 4. 寻找支持。与朋友、家人或专业人士交流自己的情绪和想法，可以让你得到支持和建设性的反馈，也可以使你获得更好的解决方案。 5. 保持健康的生活方式。充足的睡眠、良好的饮食和适量的锻炼可以帮助你保持健康的身心状态，可以减少消极情绪的发生。 6. 学习应对技巧。学习一些应对技巧可以帮助你积极应对压力和消极情绪，例如冥想和深呼吸练习等。…
我觉得自己的生活很无聊，缺乏激情和动力，这让我感到沮丧和失落	这听起来像是你正在经历一些情感上的困扰。首先，你可以考虑一下为什么会感到生活无聊、缺乏激情和动力。有时候，这样的感受可能来自于我们的生活缺乏新鲜感和挑战。你可以尝试寻找新的兴趣爱好，尝试一些新的事情，去一个新的地方旅行，或者与朋友一起试着做一些新的活动。 另外，我们的情感状态也可能受到睡眠、饮食、锻炼和压力的影响。保持规律的作息，均衡的饮食，适量的运动和有效管理压力可能会让你感到更好。 最后，如果你感觉自己无法独自处理这些情感上的问题，建议你寻求专业心理咨询师的帮助。他们可以帮助你找到更好的方法来面对这些问题。
我经常失眠，夜晚躺在床上想着工作上的事情，家庭琐事和人际关系，导致我白天无法集中注意力，工作效率低下，情绪也变得很糟糕。	失眠是一个常见的问题，可以通过一些方法来减轻它。以下是一些建议： 1. 在睡觉前放松自己。睡觉前进行冥想或轻松读书等活动可以帮助你放松身心，减轻压力。 2. 锻炼身体。适度的身体锻炼可以帮助你消耗身体的能量，改善睡眠质量。 3. 安排好睡眠时间。保持规律的睡眠时间可以帮助你调整自己的生物钟，使你在晚上更容易入睡，在早上更容易醒来。 4. 避免在晚上接触刺激性物质。例如饮用咖啡或茶类的饮料，或者吸烟等行为，都会刺激你的身体，导致难以入睡。 5. 改善睡眠环境。让你的卧室保持舒适，安静和黑暗，可以减少睡眠的干扰因素，帮助你更好地入睡。 如果这些方法无效并且你的失眠问题持续存在，请考虑向医生或专业心理医生寻求帮助。
当我遭遇到挫折和失望的时候，我想只有把一切忘记才能安然无恙。	尽管面对挫折和失望可能让您感觉无从下手，但试图忘记所有可能不会解决问题。相反，您应该试着处理和解决这些问题。尝试聆听您内心的声音，了解自己的情感并制定一个积极的计划来克服它们。寻求支持和建议也可能很有帮助，这可以包括与亲朋好友交流或寻求专业帮助。无论您如何处理，要记得保持积极、勇敢和坚韧，这样您就可以战胜挫折，变得更加强大、自信和成功。
我经常感到疲惫和无力，即使没有做什么体力活，也会感到疲惫不堪，我还经常失眠和无法入睡，这让我感到非常不舒服和困扰	很抱歉听到您的身体和睡眠状况不好。有多种原因可能会导致这些问题，例如缺乏营养、缺乏运动、压力过大等等。建议您检查一下自己的生活方式，是否有规律的饮食、运动以及足够的休息时间。同时，尽量减少压力，保持心情舒畅。如果这些方法都无法缓解您的症状，建议咨询医生进行进一步的诊断，以找出更明确的原因并获得正确的治疗方法。
我有时会患上抑郁症，不能正常进食，然后又因为害怕别人看到我身体变得瘦小，而控制住了我的进食	抑郁症和心理压力常常会影响人的食欲和营养摄入。然而，少吃并不是抑郁症的解决之道。因为饮食不均衡会更加恶化心理健康状况。我建议你寻求心理医生的帮助，了解更多关于抑郁症的信息，并处理压力和焦虑感。此外，你可以咨询营养师，制定出一份健康的饮食计划，以保证身体健康。请记住，照顾好自己是最重要的事情。
我的父母总是批评我，无论我做什么都不够好，这让我感到非常压抑和失望，我觉得自己永远不可能得到他们的认可和赞扬	非常抱歉听到你现在的困境，这听起来对你来说是非常疲惫的。首先，你需要知道的是，你并不是一个失败者或不够好的人，只是因为你的父母总是批评你而导致你感到无法被接受。 以下是一些建议，希望能对你有所帮助： 1. 与你的父母沟通。可能最好的解决方法就是直接与你的父母谈谈。告诉他们你的感受，让他们意识到他们的批评行为对你造成的负面影响。与他们一起探讨其他方法，他们可以帮助你成长并感到更有自信。 2. 建立自我认知。 你需要学会如何建立自我认知，即了解自己的长处和优点。这可以通过进行自我反思和笔记，定期回顾过去的成就等来实现。你需要相信自己，发掘自己的长处，以此来增加自信和自尊心。 3. 寻求支持。 找人谈谈自己的问题，寻求支持和理解，这可以帮助你情感上得到解脱，减少心理上的压力。你可以找一位心理治疗师或者一位信任的朋友倾诉你的问题。 4. 关注自己的成长。 不要让父母的批评阻碍你的成长。 相信自己…
我的恋爱关系总是很不稳定，我总是被情绪所左右，无法健康地维护好自己的感情关系	那么首先你需要做的是加深对自己情绪的认知，了解自己何时会被情绪所左右，以及情绪的来源是什么。这可以通过自我反省和沟通交流来实现。 其次，你可以学习一些情绪管理技巧，如深呼吸、放松身体、积极心态等，以帮助你更好地控制自己的情绪。 此外，建立一个健康积极的生活方式也对情感关系有帮助，如良好的饮食习惯、充足的睡眠和适当的运动等。 最后，要注意沟通和理解对方的感受，共同努力维护好感情的关系。
小玲在大学里遭受了欺凌，导致她变得自卑和抑郁，我该如何帮助她重建自信和心理健康？	首先，你可以表现出对小玲的关心和支持，并尽可能地提供支持和帮助。你可以倾听她的感受和故事，并让她有机会表达自己的情感。 其次，你可以帮助小玲寻找专业心理医生或临床心理学家，以寻求专业的心理咨询和治疗。他们可以提供更深入的支持和指导，帮助小玲掌握应对欺凌和难堪的技能，并恢复信心和心理健康。 还有一些其他的建议，如健康的生活方式、参加社交活动、结交支持性朋友和花更多的时间做自己喜欢的事情。这些可能有助于减轻小玲的心理负担，并让她重拾信心和积极的心态。
我的家庭关系很复杂，我常常感到压力和不安，不知道该如何处理这些问题，也不知道该向谁求助。	我很理解你的困扰和烦恼。在面对复杂的家庭关系问题时，有时候我们确实需要一些帮助和支持。我建议你可以考虑以下几点： 1. 找人倾诉：向朋友、亲戚或者心理医生倾诉你的问题和感受可能能够减轻你的负担。你可以寻求一些专业的机构或者线上咨询来寻求帮助。 2. 接受现实：有时候我们不能改变家庭的现状，但是我们可以改变自己对待问题的态度。采取积极的心态，情绪容易调整平稳。 3. 找到自己的出口：寻找一些自我放松的方式，比如看书、听音乐、练习瑜伽等等。这些活动能够帮助你放松自己的身心，减轻压力。 总之，处理复杂的家庭关系需要时间和耐心，期望我的建议有帮助到你。
我有一个朋友，他总是消极抱怨，对任何事情都没有积极的态度，我觉得他的消极情绪影响了我的情绪，但我不知道该怎么跟他沟通	与消极抱怨的朋友交流可能会令人感到挑战。以下是一些建议，你可以借鉴： 1. 倾听：在你与朋友沟通时，给予他充分的倾听空间，让他表达自己的感受和情绪，了解他的处境和原因。这可以帮助你更好地理解他的想法和行为，并表现出你的关心和支持。 2. 表现出你的感受：告诉你的朋友，他的消极情绪如何影响你的感受和情绪。你可以试着以“我”的方式表达，比如说：“当你总是抱怨时，我感到很紧张和无助。我想与你保持积极的态度，你能帮助我吗？” 3. 提供建议：你可以向他提供一些积极的建议和想法，让他从另一个角度看待问题。鼓励他去寻找解决问题的方法，并支持他的努力。 4. 保持耐心和关心：消极抱怨的朋友有时可能需要更多的时间和支持才能改变自己的思维方式，不要太过强求，要保持耐心和关心，这样可以使你们的关系更加良好。
最近发现自己总是失眠，即便睡着了也会做噩梦，醒来后感觉很沉重，怎么办	失眠和噩梦都是睡眠质量差的表现。以下是一些可能有帮助的建议： 1. 建立好的睡眠习惯。 2. 晚上要避免看电子屏幕，减少蓝光对睡眠的影响。 3. 睡前可以做些放松的活动，如泡个热水澡或喝杯温奶等。 4. 确保睡眠环境安静、黑暗、凉爽。 5. 防止饮酒、吸烟或饮用过多咖啡因等刺激性物质。 6. 如果以上方法无效，可以考虑咨询专业医师的建议，或采取一些药物或治疗方法，如催眠药或行为治疗等。 7. 做一些身体和心理放松训练，如瑜伽和冥想等，有助于缓解紧张情绪，改善睡眠质量。
有时候和朋友聊天，总觉得说话完了就到此为止，没有话语可说	这是一个很普遍的情况，尤其是在和不是很熟悉的人聊天时。以下是一些可能会帮助你的技巧： 1. 询问他们的兴趣爱好。了解他们喜欢做什么，这可以引起更深层次的对话。 2. 谈论一些流行的话题，比如电影、体育、音乐、娱乐、流行文化等等。 3. 提出一些有趣、开放性的问题，这样就可以让对方更多地参与讨论，从而引导对话的方向。 4. 想一下你喜欢的话题并分享给对方，例如你最近读的一本好书，听到的一个有趣故事，或者一个新的活动或餐厅。 5. 最好不要一直谈论你自己，尝试更多地倾听对方的话，问问他们的看法和想法，这可以促进更平衡和深入的对话。 最重要的是，要有信心和放松，尽可能地享受这段交谈的过程。
我的孩子在学校里被欺负了，他现在变得非常沉默寡言，我不知道该怎么帮他	很抱歉听到这件事情让您和孩子感到困扰。在这种情况下，最好的建议是： - 首先，与孩子沟通。倾听他的感受，并让他知道他有您作为支持者的存在。如果孩子不想谈论，不要逼迫他，但是确保他知道他可以随时与您聊天。 - 在学校里采取行动。您可以与老师，辅导员或学校管理层联系，向他们报告欺凌行为，并请求他们采取行动。让他们知道您自己的观察情况，以及您对儿子受到欺凌的影响。 - 鼓励孩子参加社交活动。例如带他去参加课外俱乐部或活动，让他有机会结交新的朋友。这将增加他的自信心和归属感，使他觉得他不是一个孤立无援的人。 - 购买应对欺凌的书籍，以帮助您的孩子更好地了解如何应对和处理欺凌行为。您可以为他们找一些儿童/青少年适用的读物，或者自己做一些自我防御培训的材料或是关于如何与同龄人建立良好关系的指南。 请牢记，这些负面的经历可能使孩子变得不自信和消极，因此需要更多付出。而他们最需要的是一个安全和温暖的家庭…
每当我和人交流时，总是感到很紧张，不知道该说什么，怕自己讲错话	交流紧张是很常见的问题，不用太担心。以下是一些建议可以帮助你缓解紧张感，更自信地与他人交流： 1. 做好准备。如果你知道你要和某个人见面或谈话，试着提前准备一些话题或问题，这样你就会感觉更有信心和控制。 2. 练习。在安静的环境下，练习和认真听取你讲话的朋友或家庭成员交流。 3. 聆听。有时你不必说太多，聆听别人说的话可以根据对方的问题和感受进行更自然的回应。 4. 放轻松。试着放松身心，深呼吸，集中精力和放松身体。 5. 认识到错误是常态。不必害怕说错话或犯错误，重要的是你尝试着重新理解和解决错误。 最重要的是要保持积极的态度，不要让紧张感和担忧影响你的交流能力。
每当我一个人待着的时候，我就开始有莫名的恐惧感，不知不觉被一种无形的力量控制，我觉得自己被抓住了，被困在一个不可突破的壳里，有时候一切都会变得极度的恐惧	这听起来像是焦虑症状。如果这些感觉持续并且影响到了你的生活，我建议你找到一位专业的心理医生进行咨询和治疗。他们可以帮助你控制和减轻这种恐惧感，并教你如何应对和处理这种情况。在等待会面医生期间，你可以试着通过身体锻炼、深呼吸、冥想等身体和心理上的方法来缓解焦虑和恐惧感。
我总是对自己太苛刻，觉得自己不够好，不值得被爱和重视	这是一种常见的挑剔自己的想法，但并不代表这种想法是客观的，也不代表一定是真实的。我们每个人都有自己的优点和缺点，是人就会犯错，这是正常的。请尝试以下几种方法： 1. 试着接受自己的缺点，并专注于发展自己的优点。 2. 围绕着可以改进的事情，制定一个可以实施的计划，逐步实现自己的目标。 3. 找一些可以支持你的人，跟他们交流，寻求他们的帮助和意见，将会很有用。 4. 读书、做运动、旅行等活动，可以让你获得更多的感受和经历，进而让你更加肯定自己的价值。 最重要的是记住，每个人都是有价值的，没有人会完美，大家都会在不同的阶段遇到挑战。对自己多一些宽容和包容，会帮助你更快地成长和改变。
我的生活就是不断的受挫，无论做什么都失败，我觉得自己没有价值	我很抱歉听到您如此失落，这听起来像是您正在感受到自己的自尊心受到摧毁。 请相信，失败并不意味着您没有价值。我们都有弱点和错误，但它们并不定义我们。失败是成功的一部分，是一种学习的过程，使我们变得更加强大和有经验。 无论您做什么，只要您尽了自己最大的努力，就可以自豪地说自己已经做到了最好。 请记住，您每个人都有自己的独特才能和贡献，如果您觉得自己无法独立应对，请不要犹豫寻求帮助。
我总是被人欺负，被人看不起，觉得自己很没用，很无能，无法在社交场合中表现自己的真正实力和能力，总是躲在角落里	听起来你正在经历自卑和社交恐惧的挑战。这些感觉是很正常的，但是可以通过探索自己的内心找到一些解决方案。 首先，你需要试着认识到自己所具备的优点和长处。不要轻易地否定自己，而是努力寻找自己的优点。这可以帮助你建立自信心。 其次，尝试舒缓压力和放松身体。例如，你可以练习深呼吸或其他放松技巧来帮助你在社交场合中更加自在。 第三，在社交场合中，试着专注于与他人建立真正的联系。不要太过于关注自己或他人对你的看法，而是寻找共同点并关注他人的需求和利益。与他人建立真正的联系可以帮助你感受到自己的重要性并增强自信心。 最后，不要忘记自己的价值。你的价值不仅仅在于社交能力，还体现在你的思想、兴趣、经历和个人品质中。尽管你可能感到挫败和无力，但你有能力在自己的生活中取得进展。始终记住，你是有价值和重要的。
我对未来感到迷茫和无助，不知道自己该做什么，也不知道自己想要什么，这让我感到很焦虑和不安，担心自己无法找到人生的方向。	这种感受很常见，而且一点也不奇怪。许多人都会经历迷茫和无助的时期，所以你并不孤单。想要找到人生方向需要时间和努力，但首先你需要找到自己的兴趣和价值观。 可以花些时间自我探索，了解自己的喜好和想法。可以试着去做一些新的事情，参加一些不同的活动，这样可以让你更容易地发现自己的兴趣所在。另外，可以和身边的人交流，听取他们的建议和想法，可能会对你有所启发。 最重要的是，不要太过担心，人生本来就是充满变数和不确定性的。继续努力，保持积极的心态，最终你会找到自己的方向。
我不知道为什么总是会想太多，担心未来的事情，而且每次出门都要反复确认锁门关窗，这让我感到非常疲惫和烦躁	这听起来像是焦虑症状，许多人都有类似的感受。建议找一位专业的心理治疗师或医生进行咨询，他们可以提供更有针对性的建议和治疗方案。同时，您可以尝试一些放松身心的方式，如深呼吸、冥想或瑜伽等，以缓解焦虑症状。另外，加入一些运动或社交活动也可以帮助缓解压力。最重要的是要关注自己的感受，并寻求帮助。
我曾经遭受了性侵害，虽然已经很长时间了，但是我仍然感到很痛苦和困扰，我该如何去面对这个过去的伤痛？	首先，请接受我的同情和支持，性侵害是一种非常严重的犯罪。您应该知道，您所感受的痛苦和困扰是可以被治疗和减轻的。 以下是一些您可以尝试的方法： 1. 寻求专业帮助：心理治疗或心理咨询可以帮助您应对和处理这种创伤性的经历。寻找经验丰富的心理医生或治疗师以便向他们倾诉和寻求帮助，他们能够帮您有效地减轻负面情绪的影响。 2. 寻找安静的空间：在当下的繁忙生活中很难从过去的伤痛中解脱出来，所以寻找一个安静的环境来帮助您沉淀自己的情绪和思维，例如图书馆、公园或自然环境等。 3. 与亲密的朋友和家人交流：寻找支持性社交圈并告诉他们您的经历是很有必要的。这可以帮助您得到情感和社交上的支持，这也可能减轻您的焦虑和抑郁。 4. 发泄情绪：将您的情绪发泄出来有助于释放压力。您可以尝试写日记、练习瑜伽或进行一些其他的身体活动。这也是减轻压力和思维障碍的有效方法。 最重要的是，您不需要孤军奋战。寻求应有的治疗对您…
我感到自己的人生缺乏意义和目标，无法找到自己真正想要做的事情，这种迷茫的感觉让我感到非常痛苦。	感到人生缺乏意义和目标是一个很常见的问题，很多人都曾经经历过类似的状况。不过，这并不是没有解决办法。以下是一些可能会帮助你的建议： 1. 反思自己：花点时间深入思考自己的想法、价值观和热情。如果不知道自己真正想要什么，建议尝试一些新的事物，例如艺术、音乐、体育、志愿服务、旅行等，逐渐了解自己对哪些事情感兴趣。 2. 设定目标：如果你有一些目标，尝试将它们分解为小的步骤和行动计划。这可以让你感到更加有掌控力，并且更容易实现目标。当然，你也可以尝试设定一些具体而可行的长远目标。 3. 寻求支持：在这种情况下，尝试和亲朋好友交流，向他们寻求支持和建议。另外，你也可以考虑咨询心理专家，他们可以提供更加个体化的建议。 4. 接受自己：有时，陷入迷茫的人也许会感到自己是个失败者，这是不正确的想法。每个人都有自己的长处和局限性，应该努力接受自己，并且珍惜自己的优点。 最后，需要注意的是，不要过于苛求自…
一天，我发现了一种想要逃离自己真实世界的方式，就是把头放在沙发上，把耳朵堵上，不听外面的声音，让自己完全陷入到一个只有自己的世界中，当自己陷入到这个世界时，一切的烦恼都会消失。	虽然这种方式可以帮助你暂时逃避现实，但长期看来并不是一个健康的解决方法。避免面对困难和烦恼并不是一个长期有效的解决方法，因为这些问题不会消失，只会积累并产生负面影响。建议你学习更好的应对方法，比如积极寻求帮助和支持，处理和解决问题，同时寻找更积极的方式来管理压力和焦虑。
我经常感到孤独和无助，觉得自己不被任何人理解或支持，即使身边有人也会感到隔阂和疏远，这种情绪让我很沮丧和消极，有时候还会引发焦虑和抑郁症状	听到你的感受，我能感到你的痛苦和难处，并且真的希望能够帮到你。首先，要知道你并不孤单，许多人都有过类似的经验和情绪。其次，要尝试找到可以倾诉的人，比如亲朋好友、心理医生等，他们可以倾听你的内心疏导情绪。此外，也可以从自己身上入手，尝试培养自己的爱好、提升自我认知和自我价值感等。最后，如果你感觉这种情绪持续时间过久，建议寻求专业心理医生的帮助，来获取更具体和专业的帮助和支持。
你的一句话就可以使我的心崩溃	我不会说那样的话，作为一个助手，我的目标是帮助人们，而不是伤害他们。
我对自己的外貌和身材感到极度不满，经常出现自卑和焦虑情绪	首先，我想告诉您，您不是一个人。许多人都体验过类似的情绪。但是，我认为您应该明确几个点： 1. 您的外貌和身材并不是评价您的全部。您应该意识到自己有许多其他优点和特质，例如聪明、善良、富有想象力等。 2. 身体形态是可以改变的，如果您真的想改变，需要采取积极的行动，例如更健康的饮食、更多的运动、等等。但是，请确保您采取这些行动是出于积极的动机，而不是出于自我惩罚或贬低自己。 3. 如果您认为自己的情况已经超出您自己能力范围的控制，请考虑寻求专业帮助，例如心理医生或营养师。 最后，我想再次告诉您，您是独一无二的，您的价值不是由外表决定的。请记住要拥有爱自己的态度。
我真不知道自己在做什么，我做任何事情总是没有头绪，把我搞得很沮丧	感觉迷失方向，不知道该做什么是很常见的事情，不必过于沮丧。以下是一些建议，让你能够找到自己的方向。 1. 先找到自己的兴趣爱好，看看有什么你喜欢的事情，然后再寻找职业或学习方向。 2. 找到自己的优点和能力，了解自己的天赋和技能，看看这些能力是否可以为你的职业和生活方向提供帮助。 3. 和朋友、家人或导师聊天，听听他们的意见和建议，或许他们可以给你一些启示和建议。 4. 去参加一些职业拓展、志愿服务、实习项目等，可以让你更深地了解自己，尝试不同的领域和工作。 5. 首先设置一个小目标，然后开始行动，即使你不确定这些行动的方向是否正确，但小目标和行动无疑会提供更多的信息和经验，让你更好地了解自己的潜力和目标。
有很多社交恐惧，不敢和陌生人交流，也不喜欢在人多的场合出现，希望能够克服这些恐惧	社交恐惧是常见的心理问题之一，以下是一些建议： 1. 逐渐挑战自己。从一些不太让你觉得紧张的事情开始，比如先和亲密的家人或好友沟通，逐渐适应之后再尝试和陌生人交流，或者参加一些人数不是很多的活动。慢慢地，你会变得越来越自信，以至于可以接受更大的挑战。 2. 做好精神准备。在你要和陌生人交流的时候，提前想好你要说什么，尽量让自己放松，不要过多地关注一个简单错误或挫败。 3. 参加社交技能课程。社交技能课程有助于提高你的自信心和谈话技巧，所以考虑参加一些公共谈话、言语艺术或其他与交际有关的活动。 4. 寻求支持。当一个人感到孤单或受到钳制时，他或她往往会更加封闭。相反，寻求支持的能力可以缓解压力，提高情绪。家人、亲戚、朋友是重要的支持系统。你还可以咨询专业的心理医生来获得帮助。 最后，记住每个人要接受自己的不足，并且在不断努力中进步。
心理学家认为，极端抑郁症可能会影响到一个人的身心健康	是的，心理学家的确认为极端抑郁症可能会对一个人的身体和心理健康造成负面影响。一些可能的影响包括：睡眠和饮食的障碍，身体疲劳和体力下降，注意力不集中和性格行为上的变化，例如消极、孤独、社交退缩等。因此，及时发现和治疗抑郁症对身心健康至关重要。
每当我开始追求一个目标，就会感觉自己没有力量，每当我想要改变一些事情，就会觉得自己没有勇气	尝试以下几点可以帮助您： 1.目标拆分：将大目标分解为小目标，每次专注于一个小目标并逐步完成。这样可以避免感到力不足的情况，并激励您逐步完成长期目标。 2.明确计划：列出一份清单，详细列出达成目标的步骤和所需的行动。这也有助于确切明确自己的行动方案和预期结果。 3.自我肯定：构建积极的自我形象，肯定自己的成功和能力。每天告诉自己一些正面消息，例如：“我能做到这件事”或“我已经成功过了”。 4.实践行动：跨出第一步，尽可能快地采取行动，并根据自己的能力逐步调整。每次行动都会增加自己的信心和勇气。 5.寻求支持：寻找支持团队，例如朋友、家人、同事或专业辅导员等，他们可以为您提供鼓励和支持。 希望这些建议对您有所帮助。
因为我担心自己无法胜任现在所做的工作，所以我常常失眠，无法把注意力集中在工作上	听起来你处于一种焦虑状态，这是很常见的，特别是在新的工作环境中。首先，你需要尝试放松一下。你可以试试深呼吸、冥想、瑜伽等方式来帮助你放松身心。另外，你也可以采取一些时间管理的策略来帮助你更好地管理时间和工作任务，例如制定清晰的工作计划，优先完成重要的任务，并给自己一些小的奖励来激励自己完成任务。最后，如果这些方法无法解决问题，你可以考虑与你的上司或人力资源部门沟通，寻求他们的帮助和支持。
当我的家人拒绝我的帮助时，我会感到比以往更加痛苦	看到亲人拒绝我们的帮助时，确实会让我们感到很痛苦和失望。但是，请记住，每个人都有自己的想法和计划，而有时我们的建议或帮助并不总是符合他们的愿望和需要。 作为一位助手，我们的职责是尽力为他们提供帮助和支持，但最终的决定还是应该由他们自己来做。我们应该尊重他们的选择，不要让自己的感情压倒了他们的意愿。 如果你感到痛苦和失望，可以找到与你可以分享的朋友、家人或专业人士聊聊天，他们也可能会给你一些支持和建议。
每次遇到困难我都感觉很沮丧	遇到困难是正常的，不要太过沮丧。尝试看一下这个困难是什么，然后考虑一下解决问题的方式。你可以通过与朋友或家人交流来寻求帮助或建议，也可以寻找专业人士的帮助。适当的休息、锻炼和保持健康的饮食也可以帮助缓解压力和焦虑。记得给自己一些奖励和肯定，每一小步的进展都值得庆祝。
我经常感到沮丧和无助，觉得自己的人生缺乏意义和价值，有时候会想到自杀，但我又不敢告诉任何人，担心他们会认为我是一个弱者和失败者。	感到沮丧和无助是一种非常常见的感觉，不必因此自责或觉得自己是一个失败者或弱者。很多人在生活中经历了类似的情绪，并且坚强地克服了这些感受。 如果你感到无助和沮丧，可以尝试以下几个建议： 1. 求助：与亲朋好友、医生、辅导员、心理医生或热线专线寻求帮助很重要。 2. 确保有足够的睡眠和锻炼：全面的自我照顾可以有助于减轻情绪困扰。 3. 寻找自己感兴趣的爱好和兴趣爱好：尝试一些有意义的活动和激发好奇心的方法。 4. 建立和维护健康的社交网络：与朋友和家人交流对心理健康的恩惠是很明显的。 5. 学会冥想和放松技巧：这些技能可以帮助你放松身体和思维，减轻焦虑和压力。 无论你的情绪有多少不好，也请记住，寻求帮助并不是弱点，而是智慧之举。
我有一个朋友，他总是觉得自己不够好，不够聪明，不够有才华，甚至是不值得别人关心，这让我很担心他的心理健康。	听到你朋友的心理状态会让人感到担忧。这种情况可能是由于一些负面经历、挫折或者低自尊心引起的。以下是一些你可以帮助他缓解这种情况的建议：\n1. 倾听他的感受，表示理解和支持。让他知道他的感受被听到并且被重视。\n2. 提醒他他的优点和成就，并鼓励他学会自我肯定。帮助他明确自己的长处并提醒他那些时刻他做得很好。\n3. 提供支持和激励他寻求专业心理辅导和治疗。有时候，最好的做法是让专业的心理医生来帮助处理这样的情况。\n4. 和他一起参加一些让他感到自信和快乐的活动，比如运动或者尝试新的爱好。\n5. 正念冥想练习能够帮助人们放松和减轻压力，这对缓解不良情绪的作用非常好。\n总之，你可以帮助他找到他内心感到自信和满意的原因，支持他制定和实施一个积极的行动计划，并提供安静的支持，这将是非常有帮助的。
我经常因为工作压力和家庭纷争而感到压抑和绝望，怎样才能缓解这种情绪，保持心理健康？	压力和家庭纷争确实会影响心理健康，但是有一些方法可以缓解情绪，保持心理健康： 1. 找到放松自己的方式，比如听音乐、看电影、练习瑜伽或冥想、阅读等等。 2. 主动与朋友或家人交流，告诉他们你的感受，寻求他们的支持。 3. 培养一些健康的生活习惯，比如适量的锻炼、合理的饮食、保证充足的睡眠时间等等。 4. 尝试学习一些应对压力和冲突的技巧，比如情绪管理、沟通技巧、冲突解决等等。 5. 如果你觉得自己无法自己调节情绪，可以寻求专业的心理帮助。心理咨询师或医生可以帮助你找到更合适的解决办法。 最重要的是，不要独自承受压力和纷争，也不要放弃自己的心理健康。跟他人沟通交流，寻求帮助，在生活中保持平衡和积极的态度，你就可以度过这些困境。
最近，我的思维开始变得混乱，我开始担心自己的心理健康，这让我感到很恐惧	请不要担心，这是很常见的事情。您可能只需要一些时间来放松和重组自己的思维过程。 或者，这也可能是一个信号，表明您需要更多的支持和帮助，例如看到一位专业的心理健康专家，与朋友，家人，同事或其他人谈话，或参加一些适合您的冥想或放松技术的课程。与他人交流，识别问题，并寻求支持是让自己保持心理健康的重要步骤。
我不敢面对别人，总觉得自己不够好，比较紧张，就算朋友对我说话，我也会不停担心着他们在思考什么	这是一种普遍的情况，许多人都有类似的焦虑和不安。首先，请了解一件事情，那就是每个人都不完美，每个人都会有缺点。也许你的朋友也有类似的问题，可能他们也在担心你在想什么。所以，不要过分担心自己的缺点或不完美的地方，也不要过分关注别人在想什么。 同时，让自己尽可能地放松并真正与对方交流。当你与别人交流时，尝试关注他们说的内容，而不是过分关注自己的表现。如果你听到了刺激性的话或感到不舒服，请努力采取深呼吸和放松的方式，避免将自己推到紧张和惊慌的状态。 在慢慢地与别人交往的同时，也请务必尝试做些小事，来增强自己的信心，比如说尝试学习新技能或爱好，了解自己的长处和价值，以及接纳自己的缺点和不足。随着你的自信心增长，你会发现与人交往更加舒适和自然。
我担心不能保持心理健康，让家人失望	保持心理健康是非常重要的，特别是在这个疫情期间。请不要担心让家人失望，他们关心您的健康和幸福。如果您感到沮丧或忧虑，请不要犹豫，与亲密的家人和朋友谈论您的感受，并考虑寻求专业的心理健康支持。这会对您的健康和幸福产生积极的影响，同时也会让您的家人和朋友们感到放心和支持。
我常常感到孤独无助，即使身边有人陪伴，也觉得没有人理解自己的内心世界	我很理解你的感受。孤独无助的感觉很难受，但也很常见。即使身边有人陪伴，有时候我们仍然需要找到能够真正理解我们的人。 以下是一些建议，可以帮助你度过这样的情绪： 1. 搜寻安慰和支持的人：在生活中或者社交媒体上，找到那些能够让你感到温暖的人，和他们分享你的感受。他们可以是好友、家人、精神健康专业人士或者专门处理类似问题的社区等等。 2. 寻找自我理解：通过写日记、画画、听音乐、跑步等方式，寻找一种方式来处理你的情绪，并理解自己的内心世界。 3. 参加社交活动：寻找一些你感兴趣的社交活动，通过这些活动结交新朋友，拓宽社交圈子。 4. 建立正向习惯：通过锻炼、健康的饮食习惯、充足的睡眠、学习新技能等方式，让自己更健康、更自信。 记住，不要害怕开口说出你的感受，也不要给自己太大的压力。孤独无助的感觉不会永远存在，尤其当你付出努力时，会改变的。
我对未来感到非常迷茫，不知道自己该怎么办，这种迷茫让我感到非常焦虑和不安	我了解您的困境和感受。首先要明白的是，对未来的不确定性是非常普遍的，我们无法完全掌控一切。但是，您可以采取一些步骤来减轻这种焦虑和不安。 首先，您可以尝试关注当下，学会享受现在的生活，同时也要努力追求自己的目标。制定一个清晰的计划，为自己设定目标，把注意力集中在如何实现这些目标上。不断反思自己的进展和经验，不断调整自己的计划，这样可以让你更有信心面对未来。 另外，在面对未来时，您可以考虑和身边的人交流，向他们请教或寻求帮助。他们的经验和建议可能会帮助您理清思路和方向。 最后，不要过于担心未来，要相信自己的能力和勇气，并学会用积极、乐观的心态来面对困难和挑战。
今天参加聚会，结果被大家嘲笑，又被别人拒绝，我真的快崩溃了	听到这个消息，我很难过，但我请您不要太过伤心。请记住，您是一个优秀的人，有着很多优点和才能，不应该因别人的嘲笑或拒绝而放弃自己。您可以先调整情绪，找些喜欢做的事情舒缓一下自己，然后思考可能的原因。如果您能够从错误中学习并改进自己，相信下次不会再发生这种情况。最重要的是，不要放弃自信和勇气，我们都有失败和挫折，但只要坚持不懈，就一定会取得成功。如果您需要任何帮助，请随时联系我。
我感到自己的人际关系很困难，总是很难与别人建立起深入的联系。我觉得自己不会与人相处，也不懂得如何交流，所以很容易被孤立。我渴望能够有一些真正的朋友，但是却不知道该怎样去实现。	首先，你要明确自己想要什么，他人对你的期望是什么，你需要解决的问题是什么。尝试学习如何与他人建立联系。以下是一些有用的建议： 1. 寻找共同话题：与人交流时，找到共同话题，可以让对话更加轻松自然。尝试在自己感兴趣的领域寻找朋友，例如由兴趣爱好激起的社交活动或线上讨论。参加社交活动的人都渴望交朋友，所以你不用担心会被孤立。 2. 多与人交流：要建立深入的人际关系，与别人沟通至关重要。尝试以友好、自信、倾听的姿态主动与人交流，这是交友的第一步。 3. 付出自己的时间和精力：与人建立深入的联系需要时间和耐心。要与别人建立真正的友谊，就需要与他们保持联系。 4. 学习人际交往技巧：学习一些人际交往技巧，例如聆听技巧、与他人建立共鸣的技巧等，可以帮助你更好地与别人交流。 5. 处理自己的情绪：当你感到害怕、焦虑或不舒服时，交际可能会变得更加困难。学习更好地处理自己的情绪，减轻自己的压力和紧张感可能…
我的工作压力很大，每天都要加班，经常熬夜，我感觉自己的身体和心理都已经到了极限，但我还是无法停下来，我该怎么办才能避免崩溃。	首先，你需要给自己一些时间来休息和放松。虽然加班是必要的，但偶尔也需要休息一下。您可以尝试做一些能放松身心的事情，比如听音乐、看电影或者去散步。 其次，你可以想办法将工作量分散到更长的时间段中，以减轻工作压力。你可以制定一个清晰的工作计划，并尝试遵守它。这样，你可以更好地安排自己的时间，并保证在工作和个人生活之间取得平衡。 最后，你可以考虑寻求专业帮助，如咨询师或心理医生。他们可以帮助你开发应对压力的技能和策略，并且提供情感上的支持与帮助。
我觉得自己无法控制自己的情绪，经常会因为小事情就大发脾气，让身边的人很难受	情绪管理可以通过一些方法来学习和改善。以下是一些建议： 1. 意识到情绪。当你开始感觉到愤怒或者其他强烈的情绪时，停下来，观察你的感受。尝试找出是什么引起了这些情绪。 2. 找出触发情绪的因素。如果你能识别出引起你情绪的因素，那么你就可以采取措施来减少或避免这些因素。 3. 做深呼吸和放松练习。这些练习可以帮助你在情绪高涨时放松，并缓解一些症状，如快速的心跳和浅层的呼吸。 4. 练习正念。正念是一种冥想技巧，它可以帮助你保持当下的专注，并学会接受情绪，而不是被情绪控制。 5. 寻求专业帮助。如果你的情绪管理难以掌控，并严重影响到你的生活，那么寻求专业帮助可能是有益的。 在此基础上，还需要自我约束，想一想自己的行为对别人造成的影响，避免做出伤害他人或自己的行为。
我的家庭里没有爱，没有一句温暖的话，也没有着真正的安全感，只有对我的指责和对我的压力，因此我变得更加内向，不想与任何人打交道。	我很抱歉听到您的家庭经历。这种情况一定很令人痛苦。如果您感到需要帮助，我建议您寻求专业心理辅导或治疗，这可以帮助您处理情感并找出可行的解决方案。另外，也可以寻找亲朋好友的支持，和他们分享自己的感受和思考。无论如何，请牢记您不是一个人，有很多人可以支持您。
我很担心自己的未来，不知道自己是否能够成功，是否能够实现自己的梦想	这是正常的感受。许多人都经历过这样的情况。但是您应该知道，成功需要时间、努力和决心。 您可以保持积极的态度，思考实现梦想的步骤和计划，并为之付诸行动。 您也可以寻求其他人的建议，了解他们如何成功地实现自己的梦想。 这些都可以帮助您更加自信和确定自己的未来。 无论如何，请记住，每个人都拥有实现自己梦想的机会，只要他们坚持努力不懈，追求自己的目标。
我感到自己无法应对生活中的压力和挑战，经常出现情绪低落、焦虑和失眠等问题。	我很抱歉听到你正处于困难的情况中。这是很常见的感受，但也是可以克服的。以下是一些你可以尝试的方法： 1. 寻求帮助：寻求专业咨询师或心理医生的帮助，从而了解你面临的情境，并探索一些解决方案。 2. 与他人交流：和信任的人分享你的感受和问题，并从他们那里得到支持和建议，这可以减轻你的负担。 3. 增加锻炼频率：增加锻炼频率，如每周进行三到四次运动，这样有助于释放身体、精神的紧张状态。 4. 自主放松：使用自我放松技巧，例如深呼吸、瑜伽、冥想和与自己的兴趣爱好等，来放松身心。 5. 睡眠不足：保持良好的睡眠习惯，如在固定的时间上床睡觉，避免使用电子设备在睡觉前一小时内，保持卧室安静和舒适等。 希望这些建议可以帮助你缓解所面临的困难。
我感觉自己很孤独，虽然身边有很多人，但总觉得无法与他们真正连接，这是不是人际关系障碍？	这种感觉可能涉及到人际关系上的问题，但并不一定是人际关系障碍。有时候人们会因为不同的原因感到孤独，例如缺乏真正的交流、没有能够找到与自己志同道合的人群、生活中变化过多等。建议您首先反思一下自己身边的人际关系，是否有需要改进的地方，比如找到共同话题、增加交流时间等等。同时也可以尝试去参加一些兴趣小组或者社交活动来拓展自己的社交圈子。如果您感到这种孤独感非常持久，那么可以考虑咨询心理医生了解更多帮助。
我对未来感到非常不安，不知道自己该做什么，也不知道未来会怎样	感到不安是很正常的。但你可以采取一些行动来缓解这种不安，找到自己想要的方向。 首先，你可以制定一份明确的计划，包括你想要实现的目标和时间表。这可以帮助你更好地定位自己的方向，制定明确的步骤和行动计划。 其次，你可以寻求专业意见和指导，比如与朋友、家人、教练或顾问交流，让他们帮助你理清头绪，制定计划，并与你分享他们的经验和建议。 最后，要相信自己。你需要相信自己的决定，并相信你可以做出最好的决定。不要害怕失败或犯错，它们是你成功的一部分。
我的婚姻关系出现了很多问题，我感到沮丧和无助，不知道该如何处理	很抱歉听到您的困境和痛苦。面对困难婚姻关系的问题，以下是一些建议： 1. 沟通：尝试与您的伴侣坦诚交谈，说明您的感受和担忧，倾听对方的看法和需求。有时候，直接沟通可能解决问题，改善关系。 2. 寻求帮助：如果您和您的伴侣无法自行解决问题，您可以寻求专业帮助，如婚姻辅导师或心理治疗师。他们可以帮助您们探索您们的问题、了解彼此的需求、改善沟通和解决冲突的技巧。 3. 自我爱护：在困难时期，要保持自我爱护。注意健康、锻炼、聚会、探索兴趣等，这些都是消除压力的方法。 4. 考虑个人和情感福利：无论将来的决策如何，都要优先考虑您的个人和情感福利。这包括您的健康、幸福和自尊心。 希望以上建议能帮到您。如果您需要更深入的建议或支持，建议您咨询专业人士的意见。
我经常会感到很疲惫，身体和精神都很虚弱，甚至有时候会出现自杀的念头，感觉自己的生命没有意义	很抱歉听到您现在的困境，这可能是由于许多不同的因素引起的。您可以考虑以下建议： 1. 自我关怀：给自己一些时间来放松和休息，充分睡眠，适当运动，保持健康的饮食，让自己感到更有活力。 2. 求助专业人士：寻求心理治疗或咨询服务，专业人士可以帮助您面对这些挑战，并提供支持和帮助。 3. 社交支持：与家人、朋友或其他人建立联系，寻求帮助和支持。有人可以与您分享经验，并提供建议和支持。 4. 寻找新的爱好和兴趣：找一些新的爱好和兴趣，可以帮助您放松身心，缓解紧张情绪和压力。 5. 在日常生活中寻找希望：建立一个积极的心态，并尝试在自己的日常生活中寻找希望和成就感。记住每天都会有一些值得庆祝的事情。 如果您感到自杀或自残的念头越来越严重，请在第一时间与专业医疗机构联系，或拨打本地的紧急救助热线，这是非常重要的。
我有时候会突然出现极度恐惧和惊恐的感觉，很难控制自己的情绪和行为，这种状态持续的时间也很长。	这种突发的恐惧和惊恐感受可能是焦虑或恐慌的表现，但无法确定具体原因。建议你寻求专业的帮助，例如心理学家或医生，以便进行评估和确诊。他们可以为你制定个性化的治疗计划，包括药物治疗、认知行为疗法或其他形式的治疗，以帮助你恢复平静和控制自己的情绪和行为。同时，你可以试着通过深呼吸、冥想、运动等方式缓解身体和心理上的压力。记得及时向专业人士求助，寻求支持和建议。
每当我面临一个新的挑战，就会感到非常紧张和不安，让我觉得自己无法应对	很多人都会因为面临挑战而感到紧张和不安。这是很正常的一种情绪反应，但也可以用一些方法帮助自己应对。以下是一些建议： 1. 找到支持：和亲朋好友谈谈，寻求他们的支持和鼓励。 2. 认真准备：通过更多的知识和技能来增强自己的准备，充分了解这个挑战，有利于减少无效的焦虑。 3. 认识到自己的价值：相信自己具备足够的能力和知识去处理这个挑战。 4. 积极思考：尝试积极思考和开解自己的恐惧，采取正面的行动。 5. 进入放松状态：通过深呼吸和其他放松技术来减少压力和紧张情绪。例如，散步、听音乐、做冥想等。 希望这些建议有助于您处理挑战时的不安情绪。
我有时候会突然觉得自己不再有任何兴趣爱好，对什么都提不起兴趣，感觉自己失去了方向和动力	这可能是一种叫做倦怠的情绪，这种情绪在生活中很常见。不过，你可以通过一些方法来让自己走出这种情绪。 一、开展新的活动或爱好：尝试一些新的事情或活动，例如健身、读书、学习新技能等，这些新的活动或爱好可以带给你新的乐趣和动力。 二、制定计划和目标：为自己制定合理的计划和目标，例如学习新技术、完成一项工作或者计划一次旅行，这些目标可以激励你重新找回自己的方向和动力。 三、寻求帮助：如果你感到无助和困惑，不妨寻求专业人士的帮助，例如心理学家或辅导员，他们可以为你提供指导和支持。 四、与他人进行交流：与朋友、家人或同事进行交流和沟通，分享你的感受和经历，也许可以获得一些建议和指导。 需要注意的是，这种情绪可能需要时间和自我关爱来克服，不要随意妥协或失去信心。在保持积极的态度和愿望的同时，关注和照顾自己的身体和心理健康。
偶尔会有一种无法抑制的情绪涌上心头，我想自己有抑郁症该怎么办	如果您认为自己可能患有抑郁症，建议尽快寻求专业医疗帮助。您可以预约一位心理医生进行评估和治疗。在等待就医期间，您可以试着找到一些有益的方式来缓解自己的情绪，例如参加社交活动，锻炼身体，学习放松技巧如冥想等。记得要寻求身边支持人的支持和理解，告诉他们您的想法和感受。
我一直觉得自己的身体很不舒服，有各种奇怪的症状，但医生都说我身体很健康，让我感到很焦虑和无助。	如果医生经过测试和检查断定你的身体健康，那么你可以尝试关注你的情绪和心理状态，或者改变自己的生活方式。焦虑和压力可能导致身体出现各种症状。尝试练习深呼吸、冥想、瑜伽、运动等可以帮助你放松身心、缓解感觉不适的方法。如果你是因为焦虑感到困扰，可以考虑看看心理医生，接受咨询和治疗。
由于长期处在紧张的环境下，黄小明经常失眠，早上晚上不分，完全失去节奏	作为黄小明的助手，您可以向他提供一些帮助，以帮助他恢复正常的睡眠和日常节奏。下面是一些可能有用的建议： 1. 建立规律的睡眠时间表：建议黄小明在同一时间每晚上床睡觉，并在同一时间起床，以帮助他的生物钟调整到一个规律的节奏。 2. 改善睡眠环境：黄小明可能需要考虑将卧室的环境改善为更加舒适的环境，例如暗色调和降噪耳塞等，以减少睡眠障碍。 3. 改变日常习惯：黄小明可以试着减少咖啡因和酒精摄入，限制手机和电脑等电子设备使用时间，以帮助身体和大脑逐渐放松。 4. 寻求专业帮助：如果黄小明的失眠问题严重影响到他的日常生活，他应该考虑咨询医生或专业心理治疗师，以获取更好的帮助和治疗方案。 帮助黄小明恢复规律的睡眠和日常节奏可能需要一些时间和调整，但是只要保持坚持和努力，他一定能够成功克服睡眠障碍。
我和朋友之间的关系一直不太好，我觉得自己很难交到真正的朋友，这让我感到很孤单	很抱歉听到这个问题，孤独确实是一种很不愉快的感觉。当我们难以交到真正的朋友时，这可能是因为我们身边的人没有与我们相似的兴趣爱好、价值观或生活方式。或者，我们可能需要更主动地参与社交活动，例如加入兴趣小组、参加聚会或者志愿活动等，这些可以让我们更容易地遇到志同道合的人。同时，我们也可以考虑借助线上社交平台，如社交媒体，以扩大我们的社交圈子。最重要的是，不要放弃寻找真正的朋友，因为他们一定存在。
身边的人总是觉得我太过紧张，总是在小事情上瞎操心，我该如何放松自己？	放松自己需要一些时间和练习。以下是几个建议： 1. 做深呼吸：当您感到紧张或压力时，可以试着静坐一会儿，用深呼吸让自己放松。慢慢吸气，慢慢吐气，然后再放松肌肉。 2. 运动：运动是减轻压力最好的方法之一。可以做我瑜伽、散步、跑步、游泳等活动，来放松你的身体和心灵。 3. 找到自己的乐趣：找到自己感兴趣的事情，并且投入到这个活动中，这可以让您忘记紧张和压力。可以是一些放松的活动，像看电影、读书、听音乐等。 4. 练习冥想或瑜伽：冥想和瑜伽有助于放松身体和心灵，学习几个冥想技巧或瑜伽动作可以帮助您放松。 5. 找人倾诉：如果您感到特别紧张或者焦虑，可以寻求帮助，和亲友或者心理医生沟通交流。这样可以帮助您减轻紧张感，同时让您感到更轻松。
我的失眠使我不得不每晚都去看精神科医生	非常抱歉听到您一直在失眠。看精神科医生是一个非常好的选择，因为他们可以帮助您找到原因并提供治疗方案。除此之外，您也可以尝试一些自我管理技巧，例如练习深度呼吸和冥想，保持规律的作息时间表和避免使用电子设备等。希望这些技巧可以对您有所帮助，祝您早日恢复良好睡眠。
我觉得自己没有能力面对家庭和社会的压力，很多事都没办法完成	首先要明确的是，每个人都会面临各种压力和挑战，有时候感觉无法承受和解决这些问题。但是，重要的是如何面对和应对这些问题。 以下是一些应对压力的方法： 1.寻求帮助：有些时候，面对压力过大，我们需要向朋友、家人或专业人士求助。这些人可以提供支持、建议和指导，帮助你度过难关。 2.制定优先事项：把任务和问题排序，并找出最紧迫和重要的事情。然后尝试逐一完成这些任务，集中精力解决问题。 3.学会放松：放松身体和心灵，可以帮助你减轻压力和焦虑。尝试一些技术，如冥想、瑜伽或深呼吸。 4.寻找解决问题的方法：仔细分析问题，并尝试寻找解决问题的方法。有时候，思考和发现问题可以帮助你找出更好的解决方案。 5.坚持积极向上：保持积极的心态和态度，也是缓解压力和抗击困难的重要方法。尝试寻找灵感和动力来保持前进，不要放弃希望和信心。 最后，要知道你并不是一个人在战斗。无论你面临什么问题，都可以寻求他人的帮助和支持…
我觉得自己的人际关系越来越糟糕，无论是家人还是朋友，都不再信任我或者支持我，这让我感到很失落和绝望。	我很遗憾听到这件事情，但是你不必感到完全绝望。首先，你需要坦诚地反思自己是否做错了什么，否则，你将无法找到解决问题的方法。 如果你觉得自己做错了什么，那么你需要采取积极主动的行动来修复破裂的关系。你可以通过与他们认真地交谈，表达自己的想法和感受，试图重建信任和支持。这可能需要付出一些努力和时间，但是以积极的态度和坚定的决心，你可以实现这一目标。 另一方面，如果你认为自己并没有做错什么，那么你需要更加坚定地坚持自己的观点和信念。你也可以尝试寻求外界的支持和建议，例如寻求一位心理咨询师的帮助。他们可以帮助你更好地了解自己并提供解决问题的方法。 无论哪种情况，重要的是保持冷静和积极的态度，并向他人展示你愿意采取行动来解决问题。
我常常感到无法控制自己的情绪和行为，经常会做出冲动或暴力的举动。	这听起来可能是一种情绪失控或冲动控制障碍的情况。建议你寻求专业的帮助和支持，以帮助你识别和控制这种情况。你可以咨询一位心理医生或心理治疗师，他们可以帮助你了解情绪失控的原因，并提供具体的应对方法和技巧。另外，保持健康的生活方式和寻找适合你的放松和缓解压力的活动也可能对缓解这种症状有所帮助。
我经常害怕被别人拒绝，所以我很少把自己的想法说出来	理解你的感受。拒绝的可能性是存在的，但真正重要的是你对自己的想法、意见和情感的发声。以下是一些可能有助于您克服害怕拒绝的建议： 1. 练习积极思考，尝试更多地思考可能的积极结果，而不是只关注拒绝的负面可能性。 2. 找到信任的人，和他们分享你的想法，从而增强你的自信心。 3. 先在小范围内慢慢练习表达自己的想法，比如和家人、朋友分享你的想法，然后再扩大范围。 4. 以一种积极、开放和包容的态度去表达自己的想法，试图与别人进行有益的对话和交流，而不是直接陈述自己的观点。 5. 认识到拒绝并不是针对个人的攻击，它只是表达观点不同而已，并不意味着你的价值或能力有任何问题。 6. 培养一个积极的心态，接受不同的看法和意见，同时也不要忘记你的想法和感受的重要性。
在青少年时期抑郁症开始了慢慢发展	抑郁症是一种常见的心理疾病，通常会在青少年时期开始慢慢发展。一般来说，抑郁症的症状会随着疾病的进展变得越来越严重。抑郁症的症状包括情绪低落、失去兴趣、许多体力疲乏和缺乏动力等等。如果您或您身边的家人或朋友有这些症状，最好寻求医生的帮助，以确保得到专业的诊断和治疗。
我对自己的外貌和身体感到不满意，觉得自己不够完美，经常感到焦虑和不安	如果你对自己的外貌和身体感到不满意，这可能会导致你产生负面的情绪，如焦虑和不安。首先要明确的是，每个人都有自己独特的外貌和身体，没有任何一个人是完美的。重要的是要学会接受自己的缺点和瑕疵，并且知道自己的价值不仅仅在于外在。 以下是一些能够帮助你增强自信和减少焦虑的建议： 1. 培养自我爱护的习惯：保持健康的生活方式，包括健康的饮食和充足的运动，可以帮助你感觉更好并增强自信。 2. 培养积极的思考方式：努力专注于自己的积极特质和成就，而不是依赖别人的评价。要尽可能地将注意力集中在自己的优点上，避免过度关注缺点。 3. 寻求心理咨询：如果你无法减少焦虑的情况下，寻求专业的帮助是非常重要的。一些认知行为治疗和其他心理治疗方法可能非常有效。 最重要的是要知道，你是独一无二的，并且有无限潜力去做成任何你想要的事情。抱着自信和积极的态度去面对生活，你将更加自信和坚定。
我总是担心自己做的事情不够好，即使别人已经称赞过我，也不能放下心中的担忧	这是很常见的一种情绪，即使自己已经做得很好，但是还是会感到不够满意。可能是因为你对自己的要求过高，或者是不自信。建议你可以尝试以下方法来缓解这种情绪： 1. 接受不完美 每个人都会犯错误，或者做的不够完美。接受这一点，不要过于苛求自己，将这种经验视为成长的过程，学会对自己宽容一点。 2. 关注过程 不要总是只关注结果，而忽略了过程。尝试用心感受做事情的整个过程，学会欣赏和享受努力的过程，而不仅仅是结果。 3. 正视恐惧 如果你感到害怕或不自信，那么就正视这种情绪，不要回避。尝试在面对恐惧时勇敢前行，不断挑战自己，让自己更加果断和自信。 4. 寻求帮助 如果你在某些方面一直感到犹豫或者不安，不要害怕寻求帮助。可以寻求专业人士的意见或建议，或者从身边的朋友和家人中获得帮助。 希望这些建议对你有所帮助。记住，要相信自己，你已经做得很好了！
我发现自己越来越难以集中注意力，无论是看书还是做事情，都会容易分心	这可能是因为你遇到了注意力不集中的问题，这是现代社会常见的问题之一。以下是一些可能有用的建议： 1. 创造一个无干扰的工作环境：关掉电视、音乐和手机，寻找一个安静的地方进行工作或学习。 2. 制定计划和目标：为自己设定时间表和清晰的目标，以帮助你专注于任务。 3. 尝试使用番茄工作法：将任务切分为25分钟的时间块，每过一个时间块后休息5分钟，可以帮助你提高效率。 4. 练习冥想和深呼吸：每天花点时间练习冥想或深呼吸，在放松身心的同时提高注意力集中能力。 5. 充分休息：适当的休息可以帮助你保持精力和有效的注意力。 确保你每天睡眠充足，给自己足够的时间放松并享受自己的兴趣爱好，以减少休息不足对注意力不集中所造成的影响。 希望这些建议能帮助你提高注意力集中能力和工作效率。
我总觉得自己没有任何价值，不知道自己存在的意义是什么，每天都感到很空虚和无助。	我很抱歉听到你的困扰。首先，我想让你知道，每个人都有价值和存在的意义，即使你现在感到无助。以下是一些方法，可以帮助你找到自己的存在意义和价值感： 1. 寻求支持 - 找一位好友、家人或专业人士，寻求心理上的支持是一个非常好的开始。谈论您的困扰可以帮助您更好地理解自己的感觉，并开始探索解决问题的方法。 2. 培养自爱和自尊 - 这可以通过一些正面和健康的活动来实现，例如健身、学习新技能、阅读自助书籍或参加社交活动等。 3. 找到您的激情 - 从事您感兴趣和喜欢的事情，可以使您感到更有价值和有存在感。找到您热爱的事情并且投入其中。 4. 帮助别人 - 通过做一些善举，给他人提供支持和帮助，可以让您感到更有用和有价值。参加志愿者工作，参加慈善机构或通过社交媒体上的支持他人的方式。 我希望这些建议可以帮助您找到自己的存在意义和价值感。如果您需要进一步的支持，请不要犹豫与专业心理医生联系。
我很害怕与人交往，害怕被拒绝、被嘲笑或被误解，我常常感到孤独和无助。	感到孤独和无助是很正常的，但是有时候需要克服内心的恐惧，勇敢地面对人际交往。以下是一些可能有用的建议： 1. 寻找支持者：寻找能够支持你的人，例如，家人、朋友、教练或心理医生等。这些人可以在你需要他们的时候给予你支持和鼓励。你也可以参加社交团体，与喜欢的人分享一些共同的活动，帮助你建立联系。 2. 制定计划：为了克服恐惧，制定一个具体的计划，例如，在一周内与一个人聊天、在下一个月内参加某个社交活动等。逐步地推进，让自己逐渐感到舒适。 3. 培养自信心：要相信自己，认识到自己的优点与长处，放弃过度担心他人评价的做法，更多地关注自己的内在特点和品质。了解并接受自己的不足，争取不断进步。 4. 处理对待他人的态度：要以积极的态度来看待他人，并尝试向他们传达友好和真心。对待他人温和的态度往往会得到同样的回应。 5. 接受挫折：恐惧和担忧并不意味着你放弃目标。接受可能的挫折，并从错误和失误中吸取经…
我对自己的外貌和身材很不满意，觉得自己很丑陋，很不吸引人，经常想着去整容，去减肥，但又担心手术会有风险，害怕被别人嘲笑和不被接受。	首先，每个人都有自己独特的外貌和身材，每个人都是独一无二的。并不是所有人都需要满足特定的标准和期望。重要的是你如何看待自己，你对自己的态度是决定你幸福感和自信的关键。 如果你真的想改变自己的外貌和身材，你可以考虑一些较为非侵入性的方法，如更改饮食习惯、增加锻炼时间、优化衣着搭配等。这些习惯的改变不仅有益于健康，而且可能会使你的自信心增加，从而改变你对自己的看法。 同时，如果你仍然坚持要整容，你应该首先咨询专业医生。在选择整形手术之前，你需要考虑手术的风险以及恢复时间和成本等因素。请确保你没有被社会和其他人的标准所左右，而是根据自己的愿望和需要做出决定。 最重要的是，请不要让任何人的看法和批评影响你的自我价值。你是独一无二、珍贵而美丽的。接受自己的身体和外貌，以及热爱自己的内心和个性，这是建立健康自信的合理基础。
我经常为了工作熬夜加班，导致自己的身体状况越来越差，但是我无法停下来，因为我觉得只有这样才能证明自己的价值和能力	熬夜加班会对身体健康造成很大的危害，如果长期持续这样熬夜工作，不仅会对身体造成损害，而且还会影响工作和生活的质量。因此，虽然你想证明自己的价值和能力，但是保护自己的身体健康更为重要。 你可以尝试通过合理规划时间和任务，对工作进行更有效率的安排，避免不必要的熬夜加班。如果确实需要加班，可以尝试适当延长工作时间，而不是熬夜加班，或者和上级、同事沟通，寻求更合理的解决方案。 另外，不要只用工作来评价自己的价值和能力，也可以寻找其他途径来证明自己的价值和能力，比如参加培训、项目或社会活动等，扩大自己的社交圈子和技能，通过多方面的表现证明自己的价值。
我感到自己越来越沉迷于游戏和社交媒体，好像这些东西成了我生活中不可或缺的一部分，这种依赖让我感到无法自拔和失去了自我，我希望能够找到一种摆脱这种依赖的方法。	你的问题很常见，很多人都会在使用游戏和社交媒体时产生依赖性。以下是一些摆脱这种依赖的方法： 1.设定时间限制：在游戏和社交媒体之前，设定好使用的时间限制，并因此来规划你的日常生活，使它们与工作和其他重要任务相互协调。 2.找到替代娱乐：寻找其他的类似活动，比如阅读、户外运动或社交活动，来代替过度依赖游戏和社交媒体。 3.寻求支持：向朋友或家人寻求支持，以便在摆脱依赖时他们可以支持你，并给你提供建议和鼓励。 4.限制网络使用：禁止自己在床上、开车、工作时使用游戏和社交媒体，尝试限制你可能出现依赖的场合。 5.慢慢减少：逐步减少游戏和社交媒体的使用量，并定期自我评估以检测进展情况，如果自身管理还是不把握，那么需要寻求更专业的帮助。 希望以上这些方法对你对克服游戏和社交媒体上的依赖有所帮助。
我的心情总是起伏不定，有时候感到很开心，有时候又非常沮丧，甚至想要自杀，这让我感到非常困扰。	听到你这么说，我很担心你的心情。绝望和自杀的想法并不罕见，但也不能轻视。建议你尽快寻求专业心理帮助，如看医生、寻求治疗师、或者联系当地的心理咨询服务机构。与此同时，也可以尝试一些自我疏导的方法，如深呼吸、冥想、锻炼身体、与家人和朋友交流等等。请记得，你并不孤单，也不应该孤单。有人会支持你，愿意帮助你，也希望你能从困境中走出来，走向一个更好的未来。
有时候我会觉得没有人在乎我，只有我自己才是真正可以依赖的人	我完全理解你的感受。有时候我们会觉得孤独和无助，但是你要知道，你是独一无二的，非常珍贵和重要。你有自己的优点和长处，身边的人可能没有发现或者没有注意到。你可以试着和别人分享自己的感受，让别人了解你，支持你。也要记得，自己也可以给自己带来支持和力量。坚信自己是有价值的，同时也要尊重自己的感受和需要。
最近经常失眠，晚上总是躺在床上辗转反侧，这可能是潜在的心理问题吗	是的，失眠可能与潜在的心理问题有关。例如，焦虑、抑郁、压力、担忧等都可以导致失眠。建议您先从自我调节睡眠习惯、增加运动等方面尝试缓解，如果持续存在失眠问题，可以考虑咨询心理医生，以确定是否存在心理问题，以及采取合适的治疗方案。
我和家人的关系一直不太好，我感觉他们不理解我，不尊重我，这让我感到很孤独	我很抱歉听到这样的情况，这可能会让你感到很不舒服。但是，记住你不必孤独，有很多资源可用来帮助你和你的家人建立更好的关系。 首先，尝试与家人沟通你的感受和想法。这可能需要勇气，但对解决问题很重要。不要把你的情感藏起来，适时的表达可能会得到更好的效果。 其次，如果你感到无法直接与家人沟通，那么考虑寻求专业意见，例如心理学家、社工、家庭咨询等机构，他们将能够提供给你更好的支持和建议。 最后，尝试更深层次的沟通，探讨家庭成员之间的需求和期望，并努力理解和尊重对方的感受。这有助于更加和谐的家庭生活。
我经常感到内心空虚和孤独，想要找些事情来填补这种空洞感，但是往往找不到适合的方式来缓解这种感受	内心空虚和孤独是很常见的情绪，很多人都会有这种感觉。你想找到一些事情来填补这种空洞感，这是一个很好的努力。以下是几个可能有帮助的建议： 1. 社交。试着参加一些社交活动或加入一个社交团体（例如俱乐部、团体组织、志愿者组织等等），这可能会帮助你与他人建立联系并找到一个更紧密的社交网络。这可以在许多不同的层面上帮助你，不仅可以帮助您找到朋友和支持网络，还可以帮助您交流和建立新技能。 2. 娱乐活动。选择一些你真正喜欢的娱乐活动，例如运动、音乐、艺术、阅读等等。这些活动可以让你感到更快乐和更有成就感，同时也可以帮助你结交志同道合的人。 3. 自我发展。向内寻找并成长。这可能意味着探索您的兴趣，学习新技能，建立更健康的习惯或者深入探索您的内心。这些尝试可以很好地填补空洞感并增强您的自信心。 4. 寻求支持。如果感觉自己无法解决这些问题，寻求专业帮助也是一个好选择。专业医生或治疗师可以帮助您探索您…
