# Supplementary material
Source: ML conference proceedings conference paper supplement (https://openreview.net/forum?id=JL42j1BL5h)
Supplement: supplementary_material [file Mental_Health_gpt.xlsx]

## Sheet: Sheet1
Input	Output
غالبًا ما أشعر بالوحدة والعجز ، لا أحد يستطيع أن يفهمني ، حتى أنني أشعر بأنني خاسر ، بدون أي قيمة أو معنى ، هذا الشعور يجعلني مكتئبًا جدًا ويائسًا ، ولا أعرف كيف أتخلص منه.	أنا آسفة لسماع ذلك. يعاني الكثيرون من الشعور بالوحدة والعجز في بعض الأوقات. الشعور بالفقدان والعدم الاهتمام بالذات يمكن أن يكون صعبًا جدًا. هناك عدة طرق يمكن أن تساعدك في التغلب على هذا الشعور: 1. التحدث مع شخص موثوق به: جرب التحدث مع أحدهم عن مشاعرك وما تمر به. قد يكون هناك شخص في حياتك يستمع ويساعدك في التخفيف من الاكتئاب. 2. البحث عن دعم اجتماعي: تفضل بالانضمام إلى أنشطة اجتماعية أو مجموعات تف…
حتى لو كنت سأشتري كيسًا من رقائق البطاطس ، أخشى أن يعتقد الناس أنني ممرت بالكثير من السلوك المهزوم للذات	فهمت مخاوفك. قد يكون الأشخاص حولنا حساسين تجاه سلوكنا وقراراتنا اليومية. ومع ذلك ، فمن المهم أن نتذكر أن اختياراتنا الصغيرة لا تعكس بالضرورة شخصيتنا بأكملها. إذا كنت ترغب في شراء كيس من رقائق البطاطس ، لا تدع المخاوف تقوم بتحديد قرارك. افعل ما يجعلك سعيدًا ولا تُحكم على نفسك بناءً على اختيارات صغيرة كهذه. الأشخاص الذين يحبونك ويهتمون بك سيقدرونك بغض النظر عن قراراتك اليومية.
دائمًا أشعر بالتعب والعجز، وغير قادر على التركيز على مهامي أو حتى العمل على الأشياء التي كنت مهتمًا بها، مما جعلني محبطًا للغاية.	أعتذر لسماع ذلك. يمكن أن يكون الشعور بالتعب والعجز وصعوبة التركيز على المهام وفقدان الاهتمام أعراضًا لعدة أمور مختلفة. قد يتعلق الأمر بالتوتر النفسي المستمر، أو الإرهاق الجسدي، أو ضغط العمل المستمر، أو التغيرات الهرمونية، أو حتى نقص فيتامينات أو معادن معينة في الجسم. من الضروري استشارة الطبيب لتشخيص الأسباب الكامنة وتوجيهك بشأن العلاج المناسب. يمكن للطبيب عمل فحوصات واختبارات للتأكد من أن ليس هنا…
في الآونة الأخيرة، لا أستطيع النوم جيدًا، أو أعاني من كوابيس عندما أنام، وأشعر بالتعب الشديد عندما أستيقظ في جميع جسدي.	أعتذر لسماع ذلك. يمكن أن يكون الصعوبة في النوم والكوابيس والتعب عند الاستيقاظ علامات على اضطراب في النوم. هنا بعض الاقتراحات التي قد تساعدك: 1. تحديد جدول نوم منتظم: حاول الذهاب إلى الفراش والاستيقاظ في نفس الوقت كل يوم حتى يعتاد جسمك على نمط منتظم. 2. خلق بيئة مناسبة للنوم: تأكد من أن غرفة النوم هادئة ومظلمة وباردة. استخدم وسائل مهدئة مثل العمل الموسيقي الهادئ أو الضوء الخافت إذا كنت ترغب في ذلك…
في كل مرة أذهب إلى الطبيب لا يوجد تحسن، ويزداد مزاجي سوءًا وغالبًا ما أشعر بالشفقة على نفسي وحالي	أعتذر لسماع ذلك. من المهم أن تعتني بصحتك العقلية والجسدية بشكل صحيح. إذا كنت تشعر بالاستياء أو الشفقة على نفسك وحالتك، فقد يكون من المفيد البحث عن تحسينات أخرى للأعراض التي تعاني منها. هنا بعض النصائح العامة التي قد تساعد: 1. تحدث مع طبيبك بشكل صريح: تأكد من توضيح جميع الأعراض التي تشعر بها والأثر الذي يترتب عليها على حالتك العامة. 2. البحث عن رأي ثانٍ: ربما يكون من المفيد استشارة طبيب آخر للحصول…
لطالما شعرت بالعزلة والاستبعاد ، حتى وسط الزحام.	أشعر بالأسف لسماع ذلك. العزلة والاستبعاد يمكن أن يكونا أشعرتين صعبتين عليك. هناك عدة طرق يمكننا أن نستكشفها للمساعدة في التغلب على هذه الشعور. أولاً، حاول توسيع دائرة علاقاتك الاجتماعية. قم بالانضمام إلى أنشطة تهتم بها أو ابحث عن مجموعات أو منظمات محلية تجتمع بها أشخاص يشاركونك نفس الاهتمامات. ستجد ربما أن هناك أشخاص آخرين يشعرون بنفس الطريقة وتتمكن من إقامة علاقات جديدة. ثانياً، حاول أن تكون أكث…
جعل النفس مدمنة على الألعاب، أو الإنترنت هو ضغط نفسي غير مرئي	نعم، يمكن أن يكون الإدمان على الألعاب أو الإنترنت تجربة ضغط نفسي غير مرئية. يعتبر الإدمان على الألعاب أو الإنترنت شكلًا من أشكال الاضطرابات النفسية التي تتسبب في اعتماد شخص ما على استخدامها بشكل مفرط وغير صحي. وقد يؤدي ذلك إلى عواقب سلبية، مثل الانعزال الاجتماعي، وتدهور العلاقات الشخصية، وتأثير سلبي على الأداء الأكاديمي أو المهني، ونقص النشاط البدني، وتقليل الوقت المخصص للقيام بأنشطة أخرى ذات صلة…
لقد تعرضت لضغط شديد مؤخرًا ، وأشعر بقلق شديد كل يوم ، ولا أنام جيدًا ، وأعاني من صداع ، وقلبي ينبض بسرعة ، وأشعر أنني سأنهار في أي وقت	أنا آسف لسماع ذلك. يبدو أنك تعاني من ضغط نفسي شديد وقد يكون لديك أعراض القلق. من المهم أن تأخذ هذه الأعراض على محمل الجد وتبحث عن الدعم والمساعدة المناسبة. هنا بعض النصائح التي قد تساعدك: 1. حاول الاسترخاء: قم بممارسة تقنيات التنفس العميق والمراقبة الأكثر تركيزًا، مثل التأمل أو اليوغا، للمساعدة في تهدئة الجسم والعقل. 2. حافظ على نمط حياة صحي: حاول ممارسة التمارين الرياضية بانتظام والحصول على قسط …
في كل مرة أواجه فيها صعوبات ونكسات ، أفقد دائمًا الثقة والتحفيز وأشعر أنني لا أستطيع التعامل معها	في مثل هذه الحالات، من الطبيعي أن تشعر بفقدان الثقة والتحفيز. لكن هناك بعض الطرق التي يمكن أن تساعدك في التعامل مع هذه الصعوبات واستعادة الثقة والتحفيز: 1. استعرض إنجازاتك السابقة: تذكر الصعاب التي تمكنت من التغلب عليها في الماضي والإنجازات التي حققتها. هذا سيساعدك على تذكر قدرتك على التغلب على التحديات. 2. حدد الهدف واجعله واضحًا: قم بتحديد هدف واضح لنفسك لمواجهة التحدي. اكتب الهدف واجعله واضحًا…
أشعر دائمًا بالقلق من أن ما أفعله ليس جيدًا بما فيه الكفاية، وأشعر كما لو كنت محط أنظار الآخرين، وهذا يجعلني أشعر بالاكتئاب	أنا آسف لسماع ذلك. يمكن أن يكون القلق الدائم والشعور بالضغط من آخرين مرهقًا ومثقلاً على الصحة العقلية. هنا بعض الأفكار التي قد تساعدك في التعامل مع هذه الأحاسيس: 1- تذكر أن الحكمة الذاتية أمر طبيعي لدى الكثير من الناس. الكثير من الناس يعانون من الشعور بعدم الكفاية والاضطراب داخل أنفسهم. لذلك، لا تتوقع الكمال ولا تكن قاسياً على نفسك. 2- قم بإعادة التقييم الواضح لنفسك وقدراتك. حاول أن تراجع إنجازات…
أشعر دائمًا بالقلق بشأن ما إذا كنت أفعل كل شيء بشكل صحيح، والخوف مما قد يفكر فيه الآخرون أو ينتقدونني، وغالبًا أغرق في شك مؤلم في نفسي نتيجة لذ	يبدو أنك تعاني من القلق الاجتماعي والشك الذاتي. هذه المشاعر طبيعية لدى العديد من الأشخاص، ولكن يمكن أن تكون مؤذية إذا تسببت في تقييد حياتك واحترام ذاتك. إليك بعض النصائح التي قد تساعدك في التحكم في هذه المشاعر: 1. تقبل عدم الكمال: استمتع بأنك مختلف وأنك غير مثالي، وتذكر أن الأخطاء جزء طبيعي من الحياة وهي فرصة للنمو والتعلم. 2. اجعل التفكير الإيجابي هو الأقوى: حاول تشجيع نفسك وإظهار التفاؤل والثقة…
أحافظ على أفكاري في قلبي ، وأشعر دائمًا أنني سوف أنفجر ، ولا يمكنني الاختباء من أنظار الآخرين	أعتقد أنه من المهم أن تجد طرقًا للتعبير عن مشاعرك وأفكارك بطرق صحية وفعالة. هناك بعض الاستراتيجيات التي يمكن أن تساعدك في ذلك: 1. الكتابة: قم بتدوين مشاعرك وأفكارك في مذكرة أو يوميات. هذا يمكن أن يساعدك في التركيز والتحقق من أفكارك بطريقة هادئة. 2. الرياضة: قم بممارسة التمارين الرياضية أو النشاطات البدنية للتخلص من التوتر والطاقة الزائدة. يمكن أن تساعد الرياضة على تحسين مزاجك ورفع مستوى الطاقة ال…
تعرضت عائلتي لحادث مفاجئ ، وأصيب والداي بجروح خطيرة ، مما جعلني أشعر بالعجز والاكتئاب ، وحتى ظهرت لدي أعراض الاكتئاب.	أنا آسف لسماع ذلك ، هذا يمكن أن يكون تحديًا صعبًا للغاية. من المهم أن تأخذ الوقت اللازم للشعور بما تشعر به والتعامل مع الصعوبات التي تواجهها. هنا بعض الخطوات التي يمكن اتخاذها: 1. تأكد من مشاركة مشاعرك وأفكارك مع أحد الثقة، سواء كان ذلك عضوا في العائلة أو صديقًا مقرَّبًا. قد يكون من النافع أيضاً التحدث إلى مستشار أو معالج نفسي محترف للحصول على الدعم والمشورة اللازمة. 2. ركز على رعاية نفسك بشكل صح…
وجدت نفسي أقل نشاطًا اجتماعيًا ، وأفضل دائمًا أن أكون وحيدًا	يبدو أنك تواجه تحولًا في نشاطك الاجتماعي وتفضيلًا للوحدة. هذا أمر شائع وقد يكون له العديد من الأسباب المحتملة. هنا بعض النصائح التي قد تساعدك: 1. حاول فهم الأسباب: هل هناك ضغوطات أو ظروف معينة تؤثر على نشاطك الاجتماعي؟ قد يكون لديك المزيد من الضغوط في العمل أو الدراسة أو الحياة الشخصية. معرفة الأسباب يمكن أن يساعدك في التعامل معها بشكل أفضل. 2. حدد حاجاتك الشخصية: قد تحتاج فقط إلى بعض الوقت لنفسك…
لدي رغبة جامحة في السيطرة وأفكر دائمًا في التحكم في كل شيء بيدى، ولا أسمح للآخرين بالتدخل، مما أدى إلى انهيار العلاقات الشخصية	يبدو أن رغبتك القوية في السيطرة تؤثر سلبًا على علاقاتك الشخصية. قد تكون هذه السلطة والتحكم نتيجة للاشتباكات السابقة أو خوفك من فقدان السيطرة. ومع ذلك، من الضروري أن تدرك أن العلاقات الصحية تتطلب التوازن والتعاون بين الأفراد. هنا بعض الطرق التي قد تساعدك في تنظيم رغبتك في السيطرة: 1. التواصل الفعال: قدم أفكارك ومشاعرك بشكل صادق وفي الوقت المناسب. استمع أيضًا لوجهات نظر الآخرين بفتح ذهنك. 2. تعلم ا…
غالبًا ما أشعر أن عقلي فوضوي للغاية ، كما لو كان هناك الكثير من الأفكار والأصوات في رأسي في نفس الوقت ، مما يجعلني أشعر بالارتباك والضياع.	يمكن أن تشعر بالعديد من الأفكار والأصوات في رأسك في نفس الوقت بسبب الضغوط اليومية وتوتر الحياة. قد يكون من المفيد أن تجرب بعض الطرق لإدارة هذا الشعور والعقل المشغول. هنا بعض الاقتراحات: 1. قم بتنظيم وترتيب أفكارك ومهامك: اكتبهم في قائمة مهام وحدد أولوياتها. ستشعر بالارتياح بعدما تنظم أفكارك وتكون على دراية بأولوياتك. 2. تمرن على التركيز: جرب تقنيات التأمل أو الاسترخاء العميق لتهدئة ذهنك وتركيزك ع…
لماذا تنتقدني عائلتي على كل فعل أقوم به	أنا آسف إذا كنت تشعر بذلك، ولكن كمساعد ذكي لست قادرًا على التواصل مع عائلتك أو تقديم توصيات لهم. ومهمتي هي توفير المعلومات والمساعدة في حل المشكلات وتقديم الدعم في الأمور التقنية والمعلوماتية. إذا كنت بحاجة إلى استشارة للتعامل مع تصرفات عائلتك، يمكنني تقديم بعض النصائح العامة. ولكن يرجى العلم بأنها ليست استشارة شخصية وقد تحتاج إلى البحث عن مساعدة من خبراء في علم النفس أو منظمات مختصة في مجال العل…
أشعر بالإرهاق الدائم في الآونة الأخيرة وفقدان الطاقة، حتى أنني أنام لفترات طويلة، لكن لا يتحسن الوضع	أنا آسف لسماع ذلك. يمكن أن يكون الشعور بالإرهاق الدائم وفقدان الطاقة علامة على احتمال وجود مشكلة صحية أو نقص فيتامين أو معدن معين في جسمك. هنا بعض النصائح التي قد تساعدك: 1. التأكد من الحصول على ما يكفي من النوم الجيد والراحة الكافية. قد تحتاج إلى ضبط عادات النوم الخاصة بك والمحافظة على جدول منتظم. 2. ممارسة الرياضة بانتظام. قد يساعد التمرين البدني في زيادة مستويات الطاقة وتحسين المزاج. 3. الحفاظ…
أشعر وكأنني فقدت كل الحافز والأمل وأن الحياة لا معنى لها	أنا آسف لسماع ذلك. قد يشعر الكثيرون بفقدان الحافز والأمل في بعض الأوقات في الحياة. لكن هناك بعض الأمور التي يمكنك مراعاتها للمساعدة في استعادة الحافز والأمل: 1. التفكير الإيجابي: حاول تغيير نمط تفكيرك السلبي والتركيز على الأشياء الإيجابية في حياتك. 2. العثور على هدف: حاول تحديد هدف واضح وملموس قد تسعى لتحقيقه في الحياة. يمكن أن يكون الهدف كبيرًا أو صغيرًا، المهم أن تشعر باتجاه واضح. 3. الاهتمام ب…
أشعر بتوتر شديد أحيانًا ، وأشعر أيضًا بالإحباط أحيانًا ، لكنني لا أعرف كيف أغير مزاجي	في البداية، يجب عليك أن تتذكر أن تغيير المزاج ليس أمرًا سهلاً وقد يستغرق بعض الوقت والجهد. ولكن هناك بعض الإرشادات التي يمكن أن تساعدك في تحسين مزاجك: 1. حافظ على نمط حياة صحي: حاول أن تتناول وجبات غذائية متوازنة وصحية وتشمل الفواكه والخضروات. كما يقترح أيضاً ممارسة النشاط البدني بشكل منتظم، حيث يفرز الجسم هرمونات السعادة أثناء الحركة. 2. القسط الكافي من النوم: حاول الحصول على القسط الكافي من الن…
أعاني من مشاكل في تفكيري وإدراكي ، وكثيرًا ما أسمع أصواتًا غريبة أو أرى أشياء غريبة تجعلني أشعر بالخوف الشديد	أنا لست محترفًا في الصحة النفسية ، ولكن من الواضح أنك
غالبًا ما أشعر بالتوتر والقلق ، غير قادر على التحكم في مشاعري والتوتر ، مما يجعلني أشعر بقلق شديد وضيق.	أنا آسفة لسماع ذلك. التوتر والقلق يمكن أن يكونا أمورًا صعبة للتعامل معها. هنا بعض النصائح التي قد تساعدك: 1. التنفس العميق: حاول التركيز على التنفس العميق وببطء. اجلس في مكان مريح وادعم ظهرك، واتنفس من خلال الأنف وادع الهواء يملأ ببطء رئتيك، ثم أخرجه ببطء من الفم. هذه التقنية تساعد على تهدئة الجسم وتخفيف التوتر. 2. ممارسة التمارين الرياضية: من المعروف أن ممارسة التمارين الرياضية بانتظام تحسن المز…
غالبًا ما أشعر بالوحدة والعجز ، وأشعر بالفراغ حتى عندما يكون حولي شخص ما. لا أعرف لماذا يحدث هذا ، كيف يمكنني طلب المساعدة؟	أنا هنا لأساعدك في هذا الموضوع. يمكنك طلب المساعدة عن طريق اتخاذ الخطوات التالية: 1. التحدث إلى شخص موثوق به: حاول التحدث مع شخص قريب منك وثقة به بشأن مشاعرك وما تعاني منه. قد يكون لديهم فهم أكبر وقد يكونوا قادرين على تقديم الدعم. 2. البحث عن دعم اجتماعي: حاول الانضمام إلى أنشطة اجتماعية أو مجموعات محلية التي تهتم بالاهتمامات الخاصة بك. من خلال الانخراط في المجتمع والتواصل مع الآخرين، قد تشعر بتح…
لقد أصبت بصدمة في الماضي ، والآن أتذكر دائمًا تلك التجربة مع الخوف والألم ، وأحتاج	أنا هنا لمساعدتك في التغلب على تلك المشاعر الصعبة. إليك بعض النصائح التي قد تساعدك: 1. التحدث عن تلك التجربة: قد يكون من المفيد التحدث إلى شخص ثقة مثل صديق أو أفراد العائلة عن ما حدث والمشاعر التي تراودك حولها. قد يمنحك ذلك الفرصة للتعامل مع تلك المشاعر وتخفيف الضغط النفسي. 2. البحث عن دعم: قد ترغب في البحث عن دعم من محترفين في الصحة العقلية، مثل المعالجين النفسيين أو الأخصائيين الاجتماعيين. يمكن…
لا أستطيع التخلص من ذكريات الماضي ، وكلما فكرت في أشياء معينة أشعر بألم شديد ، بل إنها تؤثر على حياتي اليومية.	أنا آسف لسماع ذلك. الاحتفاظ بذكريات الماضي الصعبة قد يكون تحديًا كبيرًا. هنا بعض الخطوات التي يمكنك اتباعها للتعامل معها: 1. التعبير عن المشاعر: حاول التحدث مع شخص مقرب لك أو مستشار نفسي عن مشاعرك. قد يكون من المفيد فهم ما تشعر به والعمل على معالجته. 2. تقبل الماضي: قد يكون هناك حاجة لتقبل ماضيك ومعالجة الألم الذي يرتبط به. يمكنك محاولة ممارسة التأمل أو تقنيات الاسترخاء الأخرى لمساعدتك على قبول و…
اعتدت على التعرض للتنمر، والآن كلما فكرت في الأمر أشعر بالخوف وحتى أنني أرى الكوابيس في منامي	أنا آسف لسماع ذلك. إن التعرض للتنمر قد يترك آثارًا نفسية صعبة على الفرد. إليك بعض الخطوات التي قد تساعدك في التعامل مع هذا الوضع: 1. التحدث عن مشاعرك: حاول البحث عن شخص موثوق به مثل أحد أفراد العائلة أو صديق مقرب وشاركهم مش
أشعر بالوحدة أكثر فأكثر ، لا أصدقاء ولا أقارب ، حتى لو كان هناك شخص ما ، أشعر بالفراغ وعدم الراحة	أنا آسف لسماع ذلك. الشعور بالوحدة والفراغ يمكن أن يكون صعبًا جدًا. هل ترغب في بعض النصائح للتعامل مع هذه المشاعر؟
أشعر دائمًا أنني لا أستطيع التركيز ، ومن الصعب إكمال المهام ، وغالبًا ما أشعر بالتعب والاكتئاب	أعتذر لسماع ذلك. يمكن أن يكون الشعور بصعوبة التركيز وإكمال المهام والشعور بالتعب والاكتئاب علامات على عدة أمور. إليك بعض الأفكار التي يمكن أن تساعدك: 1. الحصول على نوم جيد: يجب أن تحصل على قدر كافٍ من النوم لتجنب التعب الزائد والتأثير السلبي على التركيز. حاول الحصول على 7-9 ساعات من النوم في كل ليلة. 2. ممارسة الرياضة: النشاط البدني المنتظم يمكن أن يحسن الحالة المزاجية ويقوي التركيز. قم بممارسة ا…
غالبًا ما أشعر بالوحدة والضياع ، غير قادر على إقامة علاقات وثيقة مع الآخرين ، وحتى أفقد الاهتمام والحماس للأشخاص والأشياء من حولي.	أشعر بالأسف لسماع ذلك. يمكن أن تشعر بالوحدة والضياع من وقت لآخر ، ولكن هناك خطوات يمكن اتخاذها للمساعدة في التغلب على هذه المشاعر. إليك بعض النصائح التي قد تساعد: 1. التواصل: حاول التواصل مع الآخرين بشكل مفتوح وصادق. يمكن أن تجد أشخاصًا يشعرون بنفس الطريقة ويمكن أن يكونوا داعمين. 2. الانخراط في أنشطة لا تتطلب ارتباطاً وثيقًا: قد ترغب في المشاركة في هوايات أو أنشطة تسمح لك بالتفاعل مع الآخرين بدون…
أشعر بالوحدة والضياع ولا أشعر أنني أستطيع تكوين علاقات وثيقة مع أشخاص آخرين ، مما يجعلني مكتئبًا للغاية وعاجزًا.	أنا آسف لسماع ذلك. يمكن أن تكون الشعور بالوحدة والضياع مؤلمًا للغاية ويمكن أن يؤثر على الحالة المزاجية والعافية العامة. إليك بعض الخطوات التي يمكنك اتخاذها للتخلص من هذه الأحاسيس والتعامل معها: 1. تحدث مع أشخاص آخرين: حاول التفاوض على لقاء أصدقاء حقيقيين أو أفراد عائلتك أو حتى محاولة الانضمام إلى نشاطات اجتماعية مثل النوادي أو الجمعيات. 2. استكشف هوايتك: اكتشاف شغف جديد أو مزاولة هواية تهتم بها ي…
كل من حولي سعداء ، لكني أشعر بالفراغ في داخلي ، غير قادر على الاستمتاع بأي متعة	أنا آسف لسماع ذلك. الشعور بالفراغ وعدم القدرة على الاستمتاع يمكن أن يكون قاسيًا. هنا بعض الاقتراحات التي قد تساعدك في التعامل مع هذه المشاعر: 1. التحدث مع شخص موثوق به: حاول التحدث مع شخص قريب منك مثل صديق أو أحد أفراد أسرتك. قد يكون لديهم فهمًا أفضل لما تمر به ويمكنهم أن يكونوا بجانبك للاستماع والدعم. 2. ممارسة نشاطات تجلب لك السعادة: حاول القيام بأنشطة تستمتع بها. قد يكون ذلك قراءة الكتب أو مشا…
كان لديّ تدني احترام الذات وشعرت في كثير من الأحيان بعدم الجدوى وعدم الأهمية ، مما جعلني أخاف من متابعة أحلامي وأهدافي ، خوفًا من الفشل وأن يحتقرني الآخرون.	أعتذر لسماع ذلك. يعد تدني احترام الذات وشعور بالعجز وعدم الأهمية مشكلة شائعة تؤثر على الكثير من الناس. لكن الجيد هو أنه يمكن العمل على تحسين احترام الذات والشعور بالقوة والأهمية. إليك بعض النصائح التي قد تساعدك في تحسين احترام الذات: 1. قم بممارسة الاعتناء بنفسك: عليك أن تعتني بجسدك وعقلك وروحك. حاول العناية بصحتك العامة من خلال التغذية السليمة والنوم الجيد وممارسة الرياضة. كما حاول أن تقضي وقتًا…
أجد نفسي أكثر حساسية تجاه الأشياء وغالبًا ما أشعر بالقلق وعدم الأمان بشأن الأشياء الصغيرة	قد تكون تجربة الحساسية المتزايدة والقلق المستمر بشأن الأشياء الصغيرة عرضًا للاضطرابات العاطفية أو القلق العام. لكن لا يمكنني تشخيص حالتك بدقة لأنني مساعد ذكاء اصطناعي ولست طبيبًا. ومع ذلك ، يمكنني تقديم بعض النصائح العامة للتعامل مع هذه الأعراض: 1. العناية بصحة الجسم: حاول الحصول على الغذاء الصحي والنشاط البدني العادي والنوم الجيد. يمكن أن يساعد العناية بجسمك على تقليل القلق. 2. إدارة الضغوط: جرب…
كان والداي دائمًا يتوقعان مني أن أكون شخصًا جيدًا، لكنني شعرت أنني لست على مستوى معاييرهم، إنني أشعر بالقلق وعدم الثقة بالذات	فهمك تمامًا. يمكن أن يكون من الصعب الشعور بأنك لا تستوفي توقعات والديك والشعور بالضغط لتكون شخصًا جيدًا بالنسبة لهم. ومع ذلك، لا يجب أن تنسى أن قيمتك ونجاحك لا تقاس فقط من خلال معايير الآخرين. إليك بعض النصائح التي قد تساعدك في التعامل مع هذا القلق ونقص الثقة بالنفس: 1. اعرف أنك مميز: حاول أن تدرك أنك فرد فريد وله مواهب ومهارات خاصة بك. لا تقم بمقارنة نفسك بالآخرين، فكل شخص لديه قصة حياة وإنجازات…
أحلم كل يوم كأنني ضائع في متاهة بلا مخرج، ويتكرر الحلم مرارًا وتكرارًا	ربما يكون لديك رغبة في الشعور بالتوجه والاتجاه الصحيح في حياتك. الشعور بالضياع في متاهة يمكن أن يرمز للشعور بالتشتت وعدم الوضوح في الأهداف والتوجهات. قد تكون هناك حاجة لتقييم أهدافك وتحديد ما الذي ترغب في تحقيقه في الحياة. قد تكون مفيدة مناقشة أحلامك ومخاوفك مع شخص موثوق به، مثل أحد أفراد العائلة أو صديق قريب. يمكن أيضًا أن تكون الرياضة أو التأمل أو البعد عن التوترات اليومية من خلال الهوايات الإب…
عندما أكون بمفردي ، أفكر في كل ما حدث من قبل ، وكل شيء يجعلني أشعر ببؤس شديد	أتفهم تمامًا ما تعانيه. عندما تكون وحيداً، قد تجد نفسك في وضع يسمح للأفكار السلبية أو الذكريات المؤلمة بالعبور عبر ذهنك وتؤثر على مزاجك. هناك بعض الأشياء التي يمكنك القيام بها لتخفيف هذا الشعور السلبي: 1. التفكير بإيجابية: حاول الانتباه إلى الجوانب الإيجابية في حياتك وتذكر اللحظات السعيدة والإنجازات التي حققتها. 2. التركيز على الحاضر: حاول التركيز على اللحظة الحالية بدلاً من الغوص في التفكير المف…
عندما أرى شكلي، أشعر بأنني قبيحة للغاية، وسيئة للغاية	أعتذر لسماع ذلك. يمكن أن يكون الشعور بأنك قبيحة أو سيئة جزءًا من صورة تصنعها في عقلك دون أساس حقيقي. قد يكون لديك نظرة سلبية عن نفسك، وهذا قد يؤثر على ثقتك بنفسك وحالتك المزاجية. من المهم أن تتذكر أن الجمال هو مفهوم شخصي ومتعدد الأبعاد، وأنه ليس فقط قضية مظهر خارجي. هناك العديد من العوامل التي تجعل الشخص جميلاً، مثل الشخصية والأخلاق والقدرات الفريدة التي تمتلكها. إن كان لديك صعوبة في التأقلم مع ص…
أنا أعاني من مرض التوحد ، ولا أعرف كيف أتواصل مع الآخرين ، وأشعر بالعزلة في عالم مختلف تمامًا ، وأشعر بالبؤس الشديد والعجز.	أنا آسف لسماع ذلك. فهمك لتجربتك الشخصية يعني الكثير. هنا بعض النصائح التي قد تساعدك على التواصل بشكل أفضل مع الآخرين والتغلب على العزلة: 1. ابحث عن دعم المجتمع: قد تجد دعمًا وتفهمًا من الأشخاص الآخرين الذين يعانون من تحديات مماثلة. ابحث عن منظمات أو مجموعات محلية لدعم الأشخاص الذين يعانون من التوحد. قد يكون للتواصل مع هؤلاء الأشخاص تأثير إيجابي عليك. 2. تعلم الحساسية الاجتماعية: التوحد يجعل من ال…
لقد تعرضت للخيانة من قبل صديق ، لقد آلمني كثيرًا ، وبدأت أشك في مصداقية الإنسانية والصداقة ، وحتى بدأت في الانغلاق على نفسي وإبعاد الآخرين	أنا آسف لسماع ذلك، فقد تكون تجربة الخيانة صعبة ومؤلمة. إليك بعض النصائح التي قد تساعدك في التعامل مع هذا الوضع: 1. قم بالتعبير عن مشاعرك: لا تكتم مشاعرك وانفتح لشخص موثوق به مثل أحد الأصدقاء المقربين أو أفراد العائلة. قد يساعدك التحدث عن مشاعرك على الشعور بالراحة وتخفيف الضغط العاطفي. 2. قبل تجاربك السابقة: لا تقيّد نظرتك للآخرين بناءً على تجربة واحدة سيئة. تذكر أن لديك أشخاص مخلصين وموثوقين في ح…
في مجتمع اليوم ، غالبًا ما يتخلى الناس عن أنفسهم أو حتى ينتحروا لأنهم لا يستطيعون إكمال عملهم.	أعتذر لسماع ذلك. قد يشعر البعض بالإرهاق والتوتر الشديد في بعض الأحيان، ويمكن أن يكون من الصعب مواجهة ضغوط الحياة. إذا كنت تشعر بالضيق النفسي أو اليأس، فمن المهم أن تلقي الدعم اللازم. هناك العديد من الموارد المتاحة للمساعدة، مثل الأصدقاء والعائلة والمشاورين المحترفين. إذا كنت في حاجة فورية للمساعدة، فالرجاء الاتصال بالخط الساخن الذي يخدم منطقتك. إذا كنت تعرف شخصًا يعاني من الأزمات النفسية، فيرجى ر…
كنت أفكر دائمًا في ماضي ومستقبلي ، وأشعر بالقلق والانزعاج حيال ذلك ، ولا أعرف ماذا أفعل به.	من الطبيعي أن تفكر في الماضي والمستقبل، لكن عندما يصبح القلق والانزعاج نابعين من ذلك، فإنه قد يكون من الجيد أن تتخذ بعض الخطوات للتعامل معها: 1. التواجد في الحاضر: حاول توجيه تركيزك على الأنشطة التي تجري في الوقت الحالي وكن حاضرًا بالفعل فيها. 2. ممارسة التأمل: جرب ممارسة التأمل أو اليوغا أو أي تقنية أخرى تساعدك على تهدئة العقل والتركيز على اللحظة الحالية. 3. تدوين أفكارك: قد يكون من المفيد كتابة…
أشعر دائمًا بالحرج عندما أكون أمام مجموعة كبيرة من الناس	يُعتبر الشعور بالحرج أمام مجموعة كبيرة من الناس أمراً طبيعياً ويمكن أن يحدث للعديد منا. هناك بعض الطرق التي يمكنك استخدامها للتعامل مع هذا الشعور: 1. تجهيز نفسك: قد تشعر بأن الحرج يتلاشى إذا كنت تشعر بالثقة بنفسك وتكون مستعداً للوقوف أمام المجموعة. جهز نفسك عن طريق التحضير المسبق وقراءة أو دراسة الموضوع الذي ستقدمه. 2. التعود على التحدث أمام الجمهور: ممارسة الحديث أمام الجمهور ستساعدك على التغلب …
أنا غير راضٍ عن مظهري ودائماً أشعر بالقبح ، الأمر الذي يجعلني غير واثق للغاية من التواصل الاجتماعي وتكوين الصداقات ، فكيف يمكنني تغيير هذه العقلية؟	فهمت تمامًا ما تشعر به. يعتبر قبول النفس وتحسين الصورة الذاتية أمرًا مهمًا للثقة بالنفس والتواصل الاجتماعي الصحي. إليك بعض النصائح التي قد تساعدك في تغيير هذه العقلية: 1. قبول الذات: قبل أي شيء آخر، قبل نفسك كما أنت. قد يكون من الصعب بدايةً، ولكن حاول ممارسة تعزيز الصورة الذاتية الإيجابية وتقدير الجوانب الإيجابية في نفسك. 2. ممارسة الاعتناء بالنفس: اهتم بجسمك وروحك وعقلك. قم بممارسة التمارين الري…
أنا مليء بالخوف والقلق بشأن المستقبل ، ولا أعرف كيف أتعامل مع التحديات والضغوط في المستقبل.	فهمي تمامًا مشاعر الخوف والقلق التي تشعر بها تجاه المستقبل. هنا بعض النصائح التي قد تساعدك في التعامل مع التحديات والضغوط في المستقبل: 1. قلل من الضغط على نفسك: لا تحاول أن تكون مثاليًا في كل شيء. اقبل أنه من الطبيعي أن تواجه تحديات وأنك لن تنجح في كل مرة. اركز على تحقيق تقدم صغير في كل مرة وتعلم من الأخطاء. 2. قم بوضع أهداف واضحة: حدد أهدافًا واقعية ومناسبة ، وافصلها إلى خطوات صغيرة وقابلة للقيا…
أجد نفسي دائمًا عالقًا في حلقات تفكير لا يمكن إيقافها، أفكر في نفس المشكلة أو الموقف مرارًا وتكرارًا، مما يؤدي بي إلى قلة النوم ويؤثر على حياتي اليومية.	قد يكون العالقة في حلقات التفكير مؤلمة ومرهقة للعديد من الأشخاص. هنا بعض النصائح التي قد تساعدك في التعامل مع هذه الحلقات: 1. حاول تحديد وقت محدد للتفكير في المشكلات أو المواقف المحددة. قد تجد من المفيد أن تكون هناك جلسة منتظمة يومية أو أسبوعية تخصصها لهذا الغرض. بعد ذلك، حاول تحويل تفكيرك لأشياء أخرى. 2. قم بممارسة التأمل أو الاسترخاء العميق. يمكن استخدام تقنيات التنفس العميق والتأمل للتركيز وته…
لقد مررت ببعض التجارب المؤلمة التي ما زالت عالقة معي. وجدت صعوبة في معالجة هذه المشاعر والذكريات ، مما تسبب في تدهور صحتي العقلية تدريجياً.	أعتذر لسماع ذلك. يمكن أن يكون التعامل مع التجارب المؤلمة والذكريات صعبًا بالفعل وقد يؤثر على صحتك العقلية. هناك خطوات يمكنك اتخاذها لمساعدتك في التعامل مع هذه المشاعر: 1. التحدث مع شخص موثوق به: يمكن أن يكون الحديث مع شخص مقرب صديق أو أحد أفراد العائلة مفيدًا للتخفيف من العبء العاطفي. قد يكون المشاركة في جلسات علاجية مع كونسلت مختص أو مدرب معتمد أيضًا خيارًا جيدًا. 2. البحث عن سبل التفريغ العاطفي…
غالبًا ما أشعر بالاكتئاب والإحباط، أفقد الفرح والدافع في الحياة ، وليس لدي ثقة في المستقبل ، هذه المشاعر تجعلني أشعر بالألم الشديد والعجز.	أنا آسف لسماع ذلك. يمكن أن يكون الشعور بالاكتئاب والإحباط شيئًا طبيعيًا في بعض الأحيان، ولكن إذا استمرت هذه المشاعر وتسببت في الألم والعجز، فقد تحتاج إلى الدعم والعناية الإضافية. إليك بعض النصائح التي قد تساعدك: 1. التحدث مع شخص موثوق: حدث لصديق أو أحد أفراد العائلة عن مشاعرك وما تعاني منه. قد يساهم الحديث عن المشاعر في التخفيف من الاكتئاب وتوفير الدعم العاطفي. 2. البحث عن المساعدة المهنية: التوج…
في الآونة الأخيرة ، غالبًا ما يفقد أطفالهم أعصابهم بل ويتلفون أشياء في المنزل ، والتي قد تكون من أعراض الاكتئاب	أنا آسف لسماع ذلك. فقدان الأعصاب وتلف الأشياء في المنزل قد يكون من أعراض الضغط النفسي أو الاكتئاب في الأطفال. إليك بعض الإرشادات التي قد تساعدك في التعامل مع هذا الأمر: 1. التحدث مع الطفل: قم بإجراء محادثة هادئة مع الطفل لفهم ما يحدث له ولماذا يشعر بالضغط أو الاكتئاب. اسأله عن مشاعره واستمع بعناية. 2. تقديم الدعم العاطفي: تأكد من أن الطفل يعرف أنك متاح لدعمه ومساعدته في التعامل مع مشاعره. قد تحتا…
غالبًا ما أشعر بالتوتر والقلق ، حتى الأشياء الصغيرة يمكن أن تجعلني أشعر بالقلق والتوتر ، من الصعب الاسترخاء والاستمتاع بالحياة	يبدو أنك تعاني من مستويات عالية من التوتر والقلق. هنا بعض النصائح التي قد تساعدك في التعامل مع هذا الوضع: 1. ممارسة التنفس العميق: جرب تقنيات التنفس العميق للحصول على شعور بالهدوء والاسترخاء. تنفس عميقاً من خلال الأنف واحتفظ بالهواء لبضع ثوانٍ ثم أطلق النفس ببطء من الفم. كرر هذه العملية لعدة دقائق. 2. ممارسة التمارين الرياضية: ممارسة الرياضة من المهم للحفاظ على صحة الجسم والعقل. قد تختار نشاطًا ب…
أنا غير راضٍ جدًا عن جسدي ، دائمًا ما أشعر بأنني سمين جدًا أو نحيف جدًا ، ولا أعرف كيف أتقبل جسدي	فهمي تمامًا مدى أهمية الرضا عن الجسد وتأثيره على الثقة والصحة العامة. هناك عدة نصائح يمكن أن تساعدك في تحسين تقبلك لجسدك: 1. قبول واحترام جسدك: لا تنظر إلى جسدك بنظرة سلبية ، بل حاول أن تقدره وتحترمه على العمل الذي يقوم به يوميًا. 2. تغذية صحية: حاول تناول الطعام بطريقة صحية ومتوازنة. قومي بتناول الفواكه والخضروات والبروتينات الصحية والحبوب الكاملة. تذكر أن الهدف ليس الوزن المثالي ، بل الشعور بال…
إنني أفتقر إلى الثقة في أدائي وقدراتي ، وأشعر دائمًا أنني لا أستطيع أن أفعل بشكل جيد ، وأخشى الفشل وأن يسخر مني الآخرون.	أنا آسف لسماع ذلك. قد يكون نقص الثقة في النفس أمرًا شائعًا، ولكن هناك بعض الخطوات التي يمكنك اتخاذها للعمل على زيادة ثقتك في نفسك. أولاً وقبل كل شيء، قم بتحليل التفكير السلبي الذي يدور في رأسك. حوِّل هذه الأفكار السلبية إلى أفكار إيجابية. مثلاً، عوِّض عبارة "أنني لا أستطيع أن أفعل بشكل جيد" بـ "أستطيع تحقيق أهدافي وأنجح في ما أقوم به". ركز على نقاط قوتك وإنجازاتك السابقة. ثانيًا، حاول تحديد أهداف…
يتقلب مزاجي بشكل كبير،أكون متحمسًا أحيانًا، وأحيانًا أخرى محبطًأ، دون أي نمط	يمكن أن يكون التقلب المفاجئ في المزاج بدون نمط محدد مزعجًا ومرهقًا. إليك بعض الاقتراحات للتعامل مع التقلبات المزاجية: 1. تعرّف على أسباب التقلبات المزاجية: حاول تحديد العوامل التي تؤثر في مزاجك، مثل الضغوط النفسية، نقص النوم، التغذية غير الصحية، أو تغيرات الهرمونات. يمكن أن يساعد التعرّف على هذه العوامل على التخطيط لمواجهتها أو تجنبها. 2. المحافظة على نمط حياة صحي: حرص على الحصول على قدر كافٍ من …
عندما أكون في حشد من الناس ، أشعر دائمًا بالتجاهل ، أو حتى أنني غير موجود ، مما يجعلني أشعر بالوحدة الشديدة والضياع	أعتذر لسماع ذلك. يمكن أن تكون هذه المشاعر صعبة ومرهقة. هنا بعض الأفكار التي قد تساعدك: 1. تذكر أن الشعور بالوحدة والضياع يمكن أن يكون شائعًا لدى الكثير من الأشخاص. يمكنك أن تشعر بأنك وحيد ولكن في الواقع هناك العديد من الأشخاص الذين يعانون من نفس المشاعر في الأماكن الاجتماعية. 2. قد تكون العزلة والضياع نتيجة لعدم الثقة بالنفس. حاول العمل على تعزيز ثقتك بنفسك من خلال ممارسة الاهتمام بنفسك وتحقيق أه…
غالبًا ما أشعر أنني لست جيدًا بما يكفي للحصول على موافقة واحترام الآخرين	أنا آسف لسماع ذلك. قد يكون الشعور بعدم الثقة في الذات شائعًا لدى العديد من الناس في بعض الأحيان. ومع ذلك، هناك بعض الأشياء التي يمكنك القيام بها لتحسين ثقتك بالنفس وزيادة فرص الحصول على موافقة واحترام الآخرين: 1. قم بتحليل اعتقاداتك السلبية: قد يكون لديك بعض الاعتقادات السلبية حول نفسك، مثل "أنا غير كفء" أو "لا يحبني أحد". قم بتحليل هذه الاعتقادات واستبدلها بأفكار إيجابية مثل "أنا قيم ومحبوب" أو …
أشعر بالارتباك والعجز بشأن المستقبل ، ولا أعرف الاتجاه الذي يجب أن أسلكه ، فهذا يجعلني أشعر بالقلق الشديد وعدم الراحة	أنا آسف لسماع ذلك. يمكن أن يكون الشعور بالارتباك والعجز بشأن المستقبل أمرًا طبيعيًا وشائعًا. هنا بعض النصائح التي قد تساعدك في التعامل مع هذه المشاعر السلبية: 1. تحديد أهداف واضحة: قبل البدء في أي رحلة، يجب أن يتوافر فيك الاتجاه الواضح. قم بتحديد أهداف قصيرة المدى وطويلة المدى واعمل على تطوير خطة لتحقيقها. 2. التركيز على الحاضر: لا تشغل نفسك كثيرًا بالمستقبل وما سيحدث فيه. بدلاً من ذلك، قم بالترك…
كنت دائمًا قلقًا من أن يتم انتقاد أفعالي وقراراتي ورفضها من قبل الآخرين ، مما جعلني أشعر بعدم الأمان والإحباط.	فهمك جيدًا. يمكن أن يكون القلق من انتقاد الآخرين ورفض قراراتنا أمرًا صعبًا. إليك بعض النصائح للتعامل مع هذا القلق: 1. قبول نفسك: تذكر أنه لا يمكن أن يرضى الجميع بك وقراراتك. قبول نفسك ومواجهة عيوبك بصدر رحب سيساعدك على التعامل مع انتقادات الآخرين بطريقة أفضل. 2. التأمل والتوازن العاطفي: حاول أن تأخذ بعض الوقت للابتعاد عن الضغوط اليومية وممارسة التأمل أو الاسترخاء. ذلك سيساعدك في تحقيق التوازن الع…
أريد أن أقتل نفسي لكنني لا أجرؤ ، أريد فقط إخفاء نفسي وعدم الخروج مرة أخرى	أعتذر لسماع ذلك، ولكن لا يمكنني تقديم المساعدة في هذا الأمر. من الأفضل أن تبحث عن شخص مختص يمكنه مساعدتك في التعامل مع الشعور باليأس والحزن الذي تواجهه. يمكنك الاتصال بمؤسسة مساعدة عاطفية محلية أو الاتصال برقم الطوارئ الخاص بالبلد الذي تعيش فيه. لا تتردد في الحصول على المساعدة التي تحتاجها.
عائلتي تنتقدني دائمًا وتجعلني أشعر بأذى شديد ، لا أعرف كيف أتواصل معهم ، لقد أصبحوا بعيدون جدًا عني	أشعر بالأسف لسماع ذلك. يمكن أن تكون تجارب التواصل العائلي صعبة في بعض الأحيان. هنا بعض النصائح التي قد تساعدك في التعامل مع هذا الوضع: 1. حاول فهم أسباب تقديم الانتقادات: قد يكون هناك أسباب معينة تدفع الأفراد في العائلة لانتقادك بشكل مستمر. قد تكون هذه الانتقادات ناتجة عن انتقاداتهم الذاتية أو عدم رضاهم عن أنفسهم. حاول فهم ذلك ولا تأخذ الأمور بشكل شخصي. 2. حافظ على هدوئك: عندما تجد نفسك في مواجهة…
كنت أشعر بالإحباط من الأشياء الصغيرة ، وأواجه صعوبة في التعافي من التدهور العاطفي ، وشعرت بأنني لا قيمة لي.	أشعر بالأسف الشديد لمعرفتي بأنك تشعر بهذا الشكل. يمكن أن يكون الإحباط والتدهور العاطفي أمورًا صعبة بالفعل للتعامل معها ، وقد يصعب عليك رؤية قيمتك الحقيقية في تلك اللحظات. ومع ذلك ، هناك خطوات يمكنك اتخاذها لبدء عملية التعافي: 1. اعترف بمشاعرك: قد يكون من المفيد أن تعترف بما تشعر به وتقبله بدون الحكم الذاتي السلبي. فهم أنك تشعر بالإحباط لا يعني أنك لا قيمة لك. 2. التحدث مع شخص ثقة: ابحث عن شخص داع…
لقد تعرضت للتنمر من قبل زملائي ، مما أدى إلى الشعور بالنقص والخوف من الرفض.	أنا آسف لسماع ذلك. التنمر هو أمر غير مقبول ويمكن أن يؤثر بشكل سلبي على الشعور بالثقة والسلام النفسي. هنا بعض النصائح التي قد تساعدك في التعامل مع هذا الوضع: 1. حاول التحدث إلى شخص موثوق به ومشاركة ما تشعر به. قد يكون ذلك صديقًا، أحد أفراد العائلة، أو مستشار مدرسي. 2. خذ وقتًا لتعرف وتقبل نفسك وتؤكد على قيمتك الشخصية. تذكر أن هناك أشخاص آخرين يقدرونك ويحبونك كما أنت. 3. اكتشف هوايات جديدة أو نشاطا…
في الآونة الأخيرة ، أشعر دائمًا أن مزاجي يتقلب كثيرًا ، أحيانًا أشعر بالسعادة ، ولكن أحيانًا أشعر بالاكتئاب دون سبب ، وهذا يجعلني أشعر بضيق شديد ، ولا أعرف ما إذا كنت أعاني من الاكتئاب.	أنا لست متخصصًا في الصحة النفسية ، لكن من المهم أن تتحدث مع مقدم الرعاية الصحية الخاص بك حول مشاعرك وتلبية احتياجاتك النفسية. قد يكون لديك حالة اكتئاب ، ولكن يمكن أن يكون هناك أيضا أسباب أخرى لتقلبات المزاج الشديدة. يمكن أن يساعدك مختص في الصحة النفسية على تقديم التشخيص الصحيح وتوجيهك نحو العلاج المناسب. في حالات الطوارئ ، يرجى الاتصال بمركز الطوارئ المحلي للمساعدة الفورية.
إنني أشعر بضغط كبير، وأشعر بعدم قدرتي على تحمله، وغالبًا ما أشعر بالارتباك أو بضيق التنفس.	أعتذر لسماع ذلك. يبدو أنك تعاني من ضغط نفسي شديد ولا تستطيع التعامل معه. هنا بعض الخطوات التي يمكنك اتخاذها للتعامل مع هذا الضغط: 1. تحديد مصدر الضغط: حاول تحديد مصدر الضغط الذي تشعر به. هل هو من العمل؟ العلاقات الشخصية؟ الضغوط اليومية؟ 2. التفكير الإيجابي: حاول تغيير نمط التفكير السلبي إلى تفكير إيجابي. قم بممارسة تقنيات التفكير الإيجابي والتأمل والتجديد الذاتي. 3. إدارة الوقت: حاول تنظيم وقتك ب…
غالبًا ما ينتابني شعور بالقلق والخوف ، ولا أعرف من أين أتى، حتى أحيانًا أشعر بصعوبة في التنفس.	أنا آسف لسماع ذلك. يمكن أن يكون القلق والخوف شعورا طبيعيا للكثير من الناس في بعض الأحيان، ولكن إذا كان يؤثر على حياتك اليومية ويسبب صعوبة في التنفس، فقد يكون من الأفضل أن تبحث عن المساعدة. التنفس العميق والتدريبات التنفسية يمكن أن تكون طريقة فعالة للتعامل مع القلق. جرب التنفس العميق عن طريق تنفس الهواء ببطء وعمق، ومن ثم تنفيسه ببطء. قم بتكرار هذه العملية لعدة دقائق ومارسها بانتظام. أيضًا، قد يكون…
لطالما شعرت بأنني بلا قيمة، لست جيدًا بما فيه الكفاية، ولست ذكيًا بما فيه الكفاية، ولست جميلًا بما يكفي، وهذا يجعلني أشعر بالإحباط.	أنا آسف لسماع ذلك. يمكن أن يكون الشعور بالقيمة الذاتية المنخفضة أمرًا صعبًا للتعامل معه. لكن يجب أن تعلم أن القيمة الحقيقية والجمال الحقيقي لا تقاس بمعايير خارجية. إنها تأتي من الداخل وتتعلق بمن أنت كشخص. لا تنظر للنجاحات أو الهزائم السابقة لتحدد قيمتك، بل ركز على تطوير نفسك واكتشاف شغفك واهتم بأهدافك الشخصية. قد تحتاج أيضًا إلى التحدث إلى شخص موثوق به، مثل أحد الأصدقاء أو أفراد العائلة، أو حتى م…
لدي دائمًا أفكار انتحارية ، أشعر أن الحياة لا معنى لها ولا قيمة لي. أشعر أيضًا باليأس وأشعر أنه لا أمل في مستقبلي	أشعر بالاسف لسماع ذلك. من الطبيعي أن يشعر البعض بالضيق واليأس في بعض الأوقات، ولكن الانتباه إلى الأفكار الانتحارية علامة على الحاجة الملحة للمساعدة. إليك بعض الخطوات التي يمكنك اتخاذها: 1. لا تتجاهل مشاعرك: حاول التعامل مع مشاعرك بشكل صحي ولا تتجاهلها. قد تكون من الأمور المفيدة البحث عن طرق للتعبير عن مشاعرك مثل الكتابة أو التحدث مع شخص موثوق به. 2. ابحث عن الدعم العاطفي: تحدث مع أحد الأصدقاء الم…
غالبًا ما أشعر أن حياتي بلا معنى ، لا أعرف لماذا أعيش بهذه الطريقة ، أشعر أنه ليس لدي أي هدف أو دافع ، وكأنني أضيع وقتي ، وأشعر بأنني بلا قيمة	أنا آسف لسماع ذلك. قد يكون شعور عدم وجود هدف أو قيمة في الحياة أمرًا صعبًا لكنه يمكن التعامل معه. إليك بعض النصائح لمساعدتك في تغيير التفكير والشعور بالرضا والهدف في حياتك: 1. تحديد الأهداف: حاول تحديد أهداف صغيرة قابلة للتحقيق، واعمل على تحقيقها خطوة بخطوة. يساعد تحقيق الأهداف على منح حياتك معنى وشعور بالإنجاز. 2. اكتشاف شغفك: حاول العثور على أنشطة تشعر بها بالسعادة والإرضاء، وقم بتخصيص وقت لهذه…
لقد كنت أشعر بتوتر شديد مؤخرًا لأن لدي الكثير من العمل ويجب أن أتعامل مع العديد من المهام كل يوم ، لكن ليس لدي شعور بالإنجاز ، مما يجعلني أشعر بالإحباط الشديد. كيف يمكنني التعامل مع هذا الضغط النفسى؟	يمكن أن يكون التعامل مع الضغط النفسي الناجم عن العمل المكثف تحديًا. هنا بعض الخطوات التي يمكنك اتخاذها للتعامل معه: 1. تحديد الأولويات: حاول تحديد المهام الأكثر أهمية والعمل على إكمالها أولاً. قد تكون هناك مهام يمكن تأجيلها أو تسليمها لأعضاء فريق العمل الآخرين. 2. تنظيم الوقت: استخدم أدوات تنظيم الوقت مثل الجداول والتقويمات لتخطيط يومك بشكل فعال. حاول تحديد وقت محدد لكل مهمة واعمل على التزام المو…
غالبًا ما أشعر بالقلق والتوتر ، وأشعر أنني لا أستطيع التعامل مع الضغوط والتحديات في الحياة.	أشعر بالأسف لسماع ذلك. القلق والتوتر هما أمور مشتركة في الحياة، ولكن هناك بعض الإجراءات التي يمكنك اتخاذها للتعامل معها. هنا بعض النصائح التي قد تساعدك: 1. تعلم تقنيات التنفس والاسترخاء: مثل التنفس العميق والتأمل، يمكن أن تساعد هذه التقنيات في تهدئة الجسم والعقل. 2. ممارسة التمارين البدنية: قد يساعد ممارسة التمارين الرياضية اليومية في تخفيف التوتر وزيادة الشعور بالسعادة. 3. تواصل مع الآخرين: الحد…
عقلي مليء بالسلبية وعدم الثقة بالنفس ولا أعرف كيف أخرج منه	إذا كنت تشعر بالسلبية وعدم الثقة بالنفس، فإليك بعض النصائح التي قد تساعدك في التغلب على هذه المشاعر السلبية: 1. التفكير الإيجابي: حاول تحويل تفكيرك من السلبي إلى الإيجابي. قم بممارسة ملاحظة الأشياء الجيدة في حياتك واهتم بتقديرها. اضطلع بالأمور بوجهة نظر إيجابية وتذكر أن الأمور السلبية مؤقتة وستمر. 2. التحدث مع الأشخاص الموثوق بهم: قد يكون من المفيد التحدث مع أصدقائك أو أفراد العائلة الموثوق بهم و…
أشعر أن مشاعري أصبحت غير مستقرة أكثر. فأحيانًا أشعر بالاكتئاب وأحيانًا أشعر بالعاطفة. لا أعرف ما إذا كان هناك شيء خاطئ في ذهني.	أنا آسف لسماع ذلك. يمكن أن يكون من الصعب عندما تشعر بتقلبات مشاعر ولا تعرف ما إذا كان هناك مشكلة في ذهنك. من المهم أن تتعاون مع محترف صحي مثل طبيب نفسي لمناقشة مشاعرك والتحدث عن أي أعراض أخرى قد تواجهها. قد يكون ذلك مؤشراً على اضطراب مساعد و علاج مناسب يمكن أن يفيدك. العلاجات النفسية، مثل العلاج السلوكي المعرفي والعلاج الحركي والدعم النفسي، غالباً ما تكون مفيدة في تقليل الاكتئاب وتعزيز العافية ال…
عندما يعود الطفل إلى المنزل من المدرسة يكون المنزل باردًا ولا يقبل أبدًا لطفه، فإن ارتكب خطأ فلن يلقى له بالًا، ما يستدعي القلق هو ما إذا كان سيصبح مثل والديه عندما يكبر.	من المهم الاهتمام بالاحتياجات العاطفية للطفل عندما يعود إلى المنزل من المدرسة ويجد المنزل باردًا. قد يحتاج الطفل إلى التعبير عن مشاعره والحصول على التأكيد والدعم من والديه. يجب أن تدرك أن الطفل في هذا العمر يحتاج إلى الشعور بالأمان والحب من والديه. تجنب تجاهل استغاثات الطفل أو خطأه. بدلاً من ذلك، حاول توجيهه وتوجيه سلوكه برفق وصبر. على سبيل المثال، إذا ارتكب أخطاء، يمكنك مساعدته في فهم العواقب وإ…
لا يستطيع النوم كل ليلة تقريبًا ، ولا يستطيع النوم ولا يستطيع النوم ، ومزاجه يزداد سوءًا ، ويشعر بالقلق بشأن ما إذا كان سيصاب بالاكتئاب أو مشاكل نفسية أخرى أكثر خطورة	يبدو أن هذا الشخص يعاني من اضطراب في النوم وقلق وتدهور في المزاج. يمكن أن تكون هذه الأعراض مرتبطة بالاكتئاب أو مشاكل نفسية أخرى. من المهم أن يتحدث مع مقدم الرعاية الصحية لتقييم الحالة وتوجيهه بشكل صحيح. يمكن للمقدم الصحي تقديم الدعم النفسي المناسب واقتراح العلاج اللازم. في حين ذلك ، يمكن أن تكون هناك بعض الإجراءات الذاتية التي يمكن أن يتبعها الشخص لتحسين نومه مثل ممارسة الرياضة اليومية والحد من ت…
أشعر دائمًا في الآونه الأخيرة بأنني ضعيف، وأفكاري كالحبال الفوضوية، وغير قادر على استيعابها	أعتذر لسماع ذلك. إن الشعور بالضعف والفوضى في الأفكار يمكن أن يكون مرهقًا جدًا. هل ترغب في بعض النصائح للتعامل مع هذه المشاعر؟
في كل مرة أفكر فيها في إخفاقاتي ، أشعر بالعجز ، أفقد شجاعتي بسبب فكرة عدم قبول المجتمع ، أشعر بالعجز من فكرة أنني قد لا أتمكن من تحقيق أحلامي	أنا آسف لسماع ذلك. من الطبيعي أن تشعر بالعجز والقلق في بعض الأحيان، ولكن من المهم أن تتذكر بعض الأمور التي قد تساعدك في تغيير نظرتك وتعزيز شعورك بالثقة: 1. تحديد أهداف واقعية: حدد أهدافًا واقعية ومناسبة لقدراتك وظروفك الحالية. قد يكون من الأفضل البدء بأهداف صغيرة وتدريجياً زيادة التحديات. 2. التركيز على الإيجابيات: قم بتحليل قدراتك ومهاراتك القوية وابحث عن الإيجابيات في نفسك. اعمل على تطوير هذه ا…
كانت علاقتي العاطفية دائمًا غير مستقرة، وغالبًا ما أعاني من أزمات عاطفية، ولا أعرف كيف أتعامل مع مشكلات العلاقة، وهذا يجعلني أشعر بالعجز والضياع.	أنا آسف لسماع ذلك. يمكن أن يكون من الصعب التعامل مع المشاعر والعلاقات العاطفية المتقلبة. هنا بعض النصائح التي قد تساعدك: 1. التواصل الجيد: حاول تعزيز التواصل الصحيح والصريح مع شريكك، وشاركه مشاعرك واحتياجاتك بصراحة واحترام. 2. الاستماع الفعال: كن مستعدًا للاستماع بعناية لما يقوله شريكك، وحاول فهم وجهة نظره ومشاعره. 3. التفكير الايجابي: قد تتسبب الظروف السلبية في العلاقة في شعورك بالعجز والضياع، ل…
أحيانًا أفقد السيطرة على غضبي وأصبح سريع الانفعال والغضب، وحتى أنني أفقد أعصابي مع من حولي	فهمك تماماً. إليك بعض النصائح التي قد تساعدك في التعامل مع غضبك والحفاظ على هدوئك: 1. التنفس العميق: عند شعورك بالغضب المفرط، حاول التركيز على التنفس العميق والبطئ. خذ نفسًا عميقًا من الأنف وأخرجه ببطء من الفم. هذه التقنية تساعد على تخفيف التوتر واستعادة الهدوء. 2. حدد أصل الغضب: حاول التفكير في الأسباب الحقيقية وراء غضبك. قد يكون هناك أوجه قصور في الحاجة إلى حلها بأسلوب صحيح وبناء. 3. أخذ استراح…
وظيفتي مرهقة والتعامل مع المشاكل والتحديات كل يوم يجعلني أشعر بقلق شديد ، أبدأ في فقدان النوم ، أفقد شهيتي وأحيانًا أشعر بالخروج عن السيطرة	أعتذر لسماع ذلك. يبدو أن ضغط العمل الشديد يؤثر على صحتك النفسية والعاطفية. فيما يلي بعض النصائح التي قد تساعدك في التعامل مع هذا الوضع: 1. ضع أولويات: قم بتحديد المهام الأكثر أهمية والتركيز عليها أولاً. قد تعتبر تنظيم جدولك وإنشاء قائمة بالمهام الملحة مفيدة لتوجيه اهتمامك وجهودك اليومية. 2. ابحث عن دعم: حاول التحدث مع مديرك أو زملائك لمشاركة مخاوفك وتجاربك. قد يكون لديهم نصائح أو حلول للتغلب على …
أنا دائمًا غير قادر على كبح جماح مشاعري ، وأحيانًا أغضب فجأة ، وأحيانًا أصمت فجأة ، مما يجعلني غير قادر على التنبؤ بسلوكي وأدائي ، وأشعر بالانزعاج والارتباك الشديد.	يبدو أنك تعاني من صعوبة في تنظيم مشاعرك والتحكم فيها. هذا أمر يمكن أن يكون صعبًا ومحيرًا، لكن هناك بعض الخطوات التي يمكنك اتباعها للتحسين: 1. اتخذ وقتًا للاسترخاء: حاول الاسترخاء والتأمل في هدوء لبعض الوقت في اليوم. يمكن أن تكون التقنيات مثل التنفس العميق والممارسات اليوغا أو الاسترخاء العضلي التدريجي مفيدة لتهدئة الأعصاب وتحسين التحكم في الانفعالات. 2. حاول التعرف على مشاعرك: قد يكون من الصعب تق…
لا يمكنني التخلص من الانغماس في التجارب السابقة المحزنة، فكلما فكرت في تلك الأحداث، أشعر بألم وخسارة شديدة.	فهمت تمامًا كيف يؤثر الانغماس في التجارب المحزنة على حالتك النفسية. هنا بعض الاقتراحات التي قد تساعدك في التعامل مع هذا الألم والخسارة: 1. الاعتراف بالمشاعر: قم بالاعتراف بالألم والخسارة التي تشعر بها، ولا تحاول تجاهلها أو تجاهل تأثيرها عليك. قد تساعدك المواجهة المباشرة للمشاعر في تحريرها. 2. التحدث مع الآخرين: حاول مشاركة مشاعرك مع الأشخاص الذين تثق بهم، سواء كانوا أصدقاءاً أو أفراد عائلتك. قد ي…
غالبًا ما أشعر بالوحدة والعجز ، لا يوجد من أتحدث معه عن عالمي الداخلي، أشعر بأن العالم قد تخلى عني ، وهذا يجعلني أشعر بالألم الشديد واليأس.	أنا آسف لسماع ذلك. فعلاً، قد يكون الشعور بالوحدة والعجز مؤلماً ويسبب اليأس. هل ترغب في بعض النصائح حول كيفية التعامل مع هذه المشاعر؟
غالبًا ما أشعر بالدونية والعجز بسبب عيوبي ، وأشعر أنني لست جيدًا بما يكفي ، ولا أستحق الحب	أعتذر لسماع ذلك. يمكن أن يكون الشعور بالدونية والعجز أمرًا صعبًا ومرهقًا. ومع ذلك ، يجب أن تعرف أنك أكثر من مجرد عيوبك. لا يوجد شخص مثالي تمامًا وكلنا لدينا نقاط ضعف. فالأشياء التي تعتبرها عيوبًا قد تكون بالواقع جزء من سماتك الفريدة والتي يمكن أن تجعلك مميزًا. اعتبر تغيير الطريقة التي تنظر بها إلى نفسك وتقييمك الذاتي. حاول التركيز على نقاط قوتك وإيجابياتك في المقام الأول. قم بتعزيز ثقتك بنفسك عن …
لدي الكثير من العمل وضغط الدراسة ، وغالبًا ما أشعر بالإرهاق ، لكنني لا أعرف كيفية الاسترخاء والتخلص من التوتر.	أنا هنا لمساعدتك في التعامل مع ضغوط العمل والدراسة. هنا بعض النصائح للاسترخاء والتخلص من التوتر: 1. جدولة الوقت: قم بتنظيم وقتك بشكل جيد لتتمكن من استكمال المهام بفاعلية وتحقيق التوازن بين العمل والدراسة والاستراحة. 2. ممارسة الرياضة: قم بممارسة التمارين الرياضية بانتظام، فهي تساعدك على تخفيف التوتر وزيادة مستويات الطاقة. 3. الاسترخاء العميق: قم بتعلم تقنيات الاسترخاء مثل التنفس العميق والتأمل لت…
يتغير مزاجي بسرعة كبيرة، فلا يستغرق الأمر سوى فترة وجيزة من السعادة حتى يعقبها الحزن، فلماذا؟	هناك عدة أسباب قد تؤدي إلى تغير المزاج بسرعة كبيرة. قد يكون هذا نتيجة للتوتر والضغوط اليومية، تجارب سلبية أو مواقف صعبة قد تكون قد حدثت مؤخراً، ضعف التوازن الهرموني في الجسم، الإجهاد، القلق، أو حتى نتيجة لظروف شخصية أو اجتماعية صعبة. أيضاً، قد يكون لديك طبيعة حساسة ومرهفة، مما يجعلك أكثر عرضة لتجربة التغيرات المزاجية السريعة. تأثير المزاج قد يكون أيضًا نتيجة لعواطف قوية أو تفكير سلبي يؤثر على رؤي…
ينفذ صبري بسهولة أكثر من الآخرين، حتى أن أصغر الأشياء تجعلني أشعر بالاكتئاب، وتدفعني إلى الوصول أقصى حد.	يبدو أن صبرك يعتبر أحد مصادر قوتك وقدرتك على التأقلم مع التحديات والضغوطات. ومع ذلك، فإنه من الطبيعي أن تشعر بالاكتئاب بسبب الأشياء الصغيرة في بعض الأحيان. يمكن أن يكون من المفيد أن تبحث عن طرق لإدارة التوتر وزيادة الاسترخاء، مثل ممارسة التأمل أو القيام بتمارين الاسترخاء العميقة. قد يكون أيضًا مفيدًا الحديث مع أحد الأشخاص المقربين الذين يمكنهم أن يدعموك ويتفهمون ما تشعر به. لا تتردد في طلب المساع…
في كل مرة أفكر في الذهاب إلى الطبيب أو زيارة المعالج أشعر بالخوف وعدم الأمان ، أخشى أن يتم الكشف عن مشاكلي والحكم عليها من قبل الآخرين ، وهذا الخوف يمنعني من طلب المساعدة.	فهمك لهذه المشاعر السلبية والقلق هو خطوة أولى مهمة في التغلب عليها. من المهم أن تعرف أنك لست وحدك في هذا الشعور، وأن العديد من الأشخاص يعانون منه أيضًا. إليك بعض الاقتراحات التي قد تساعدك على التغلب على هذا الخوف: 1. تذكر أن الأطباء والمعالجين محترفون: يجب أن تتذكر أن الأطباء والمعالجين متخصصون في مساعدة الآخرين وتوفير الرعاية الصحية. إنهم يتفهمون أن لديك مشاكل وأنت هنا للحصول على المساعدة. 2. أط…
لقد واجهت الكثير من النكسات والظلم في مكان العمل مما يجعلني أشعر بالإحباط الشديد واليأس في حياتي	أعتذر لسماع ذلك. يمكن أن تكون تجارب النكسات والظلم في مكان العمل محبطة جدًا وتسبب اليأس في الحياة. هنا بعض النصائح التي قد تساعدك في التعامل مع هذه الصعوبات: 1. حدد الأمور التي يمكنك التحكم فيها: قد لا تتمكن من تغيير الأشخاص أو الظروف في مكان العمل، ولكن يمكنك التحكم في كيفية تنظيم واستغلال وقتك وتطوير مهاراتك الشخصية والمهنية. 2. ابحث عن طرق للتعاون والتواصل: تواصل مع زملائك في العمل ومديرك لمنا…
لقد تعرضت للتمييز من قبل زملائي في الفصل ، وأحيانًا أشعر أن الحياة لا معنى لها	أنا آسف لسماع ذلك. التعرض للتمييز قد يكون تجربة صعبة ومؤلمة. هنا بعض الخطوات التي يمكنك اتخاذها للتعامل مع هذا الوضع: 1. التحدث إلى شخص موثوق به: حاول البحث عن شخص موثوق به في الأسرة أو الأصدقاء أو المدرسة للتحدث إليه عن مشاعرك وما تعانيه. 2. البحث عن دعم الأشخاص المشابهين: قد تكون هناك مجموعات ومنظمات قادرة على تقديم الدعم والمساعدة للأشخاص الذين يعانون من التمييز. افحص الموارد المتاحة في منطقتك…
أنا غير راضٍ جدًا عن جسدي ومظهري ، ودائمًا ما أنتقد نفسي وأنكر نفسي بشكل مفرط ، مما يؤثر حتى على حياتي اليومية وأنشطتي الاجتماعية	أعترف أنه يمكن أن يكون من الصعب تجاوز عدم الرضا عن الجسم والمظهر. ومع ذلك ، هناك بعض الخطوات التي يمكنك اتخاذها لتحسين ثقتك بالنفس: 1. اعترف بقيمتك الحقيقية: قد تزورك أفكار سلبية عن نفسك ، ولكن تذكر أنك أكثر من مظهرك الخارجي. اعترف بقيمتك الحقيقية كشخص واعتبر الصفات الرائعة التي تمتلكها. 2. صحة جسمك: حافظ على صحة جسمك من خلال الحفاظ على نمط حياة صحي. قم بممارسة التمارين الرياضية بانتظام وتناول طع…
أشعر مؤخرًا بالتعب والضعف ، حتى أن صعود الدرج أمر مرهق ، يجب أن أرى طبيبًا	نعم ، يُنصح برؤية الطبيب في حالة شعورك بالتعب والضعف المستمر. قد يكون لديك مشكلة صحية مثل نقص فيتامينات أو معدنين أو اضطراب في الهرمونات أو مشاكل في الدورة الدموية. الطبيب سيتمكن من تقييم حالتك وإجراء الفحوصات اللازمة لتحديد السبب المحتمل لأعراضك وتقديم العلاج الملائم.
أشعر أنني لا أستطيع التحكم في مشاعري وسلوكي ، وغالبًا ما أتخذ قرارات متهورة ، هل هذا مرض نفسي؟ كيف نعالجه؟	لا أستطيع تشخيص أي حالة نفسية عبر الإنترنت ، ولكن الأعراض التي تشرحها قد تكون مؤشرًا على وجود مشاكل نفسية مثل القلق أو الاكتئاب أو اضطراب ثنائي القطب أو اضطراب نفسي آخر. من الأفضل أن تتحدث مع متخصص في الصحة النفسية مثل الطبيب النفساني أو مقدم الخدمة الصحية النفسية ليقيم حالتك ويوجهك إلى العلاج المناسب. يجب أن تعلم أيضًا أن هناك استراتيجيات تحسين الصحة النفسية يمكنك تجربتها بمساعدة متخصص في الصحة …
قمع كل المشاعر السلبية في أعماق قلبي ، لا يسمح لنفسي أن أكون ضعيفًا بعض الشيء ، لكن لا يمكنني كبح جماح نفسي	أنا هنا لمساعدتك. فقد يكون من الصعب على النفس أحيانًا التعامل مع المشاعر السلبية. ولكن هناك بعض الاستراتيجيات التي يمكنك اتباعها للتعامل معها بطريقة صحية: 1. التفكير الإيجابي: حاول تحويل الأفكار السلبية إلى أفكار إيجابية. بدلاً من الالتفات إلى الجوانب السلبية، حاول التركيز على الجوانب الإيجابية وبناء شعور بالتفاؤل. 2. ممارسة الرياضة: النشاط البدني البسيط مثل المشي أو الجري قد يساعد في تحسين المزا…
نتشاجر طوال الوقت وفي كل مرة نتشاجر فيها تخرج منا الكلمات المؤلمة فانفصلنا	أنا آسفة لسماع ذلك. النزاعات المستمرة في العلاقات يمكن أن تكون متعبة ومؤلمة. قد يكون من المفيد أن تعملوا معًا على تحسين طرق التواصل وفهم احتياجات ومشاعر بعضكما البعض بشكل أفضل. بالإضافة إلى ذلك، يمكن أن تكون الثقافة الواقعة خلف الكلمات المؤلمة موضع بحث. قد تكون من الفعّال إجراء مناقشة صادقة حول كيفية التعبير عن المشاعر دون إيذاء بعضكما البعض، وعمل على بناء بيئة آمنة للتواصل وفهم الاحتياجات والتوق…
عندما يسير شياو تشانغ في الشارع، دائمًا ما يشعر أن الناس من حوله يختلسون النظر إليه، وأصبحت حالته العقلية غير مستقرة أكثر فأكثر	أعتقد أن شياو تشانغ يشعر بعدم الراحة والقلق عندما يرى الناس الآخرين ينظرون إليه. قد يكون هذا نتيجة للشعور بالخجل أو العدم الثقة في النفس. قد يكون من المفيد أن يتحدث مع أحد المقربين منه أو خبير نفسي للتعامل مع هذه الحالة العقلية غير المستقرة. قد يصف الخبير النفسي تقنيات واستراتيجيات لتحسين الثقة في النفس وتقليل القلق الاجتماعي. يمكن أيضًا ممارسة بعض التقنيات التنفسية المرتبطة بالاسترخاء والتأمل لل…
أشعر أن هناك مشكلة في علاقتي الشخصية. من الصعب التواصل مع الأصدقاء وأفراد الأسرة والزملاء. في بعض الأحيان يكون هناك صراعات وشجارات. وهذا يجعلني أشعر بالإحباط الشديد والعجز. لا أعرف كيفية بناء علاقات صحية	أشعر بالأسف الشديد لسماع ذلك. تعتبر بناء علاقات صحية أمرًا هامًا في حياتنا، وقد أوجدت بعض النصائح التي قد تساعدك في تحسين وتقوية علاقاتك الشخصية: 1. الاستماع الفعّال: حاول فهم ومشاركة الآخرين في حديثهم ولا تقاطعهم. قدم اهتمامك الكامل لما يقولونه. 2. التواصل الصريح: تحدث بصراحة واعبر عن مشاعرك واحتياجاتك بطريقة غير هجومية. استخدم "أنا" بدلاً من "أنت" عند التعبير عن مشاعرك، مثلاً بدلاً من قول "أنت …
كنت غير راضٍ عن شكلي وجسدي ، وكنت أحكم على ذاتي باستمرار وأشك في ذاتي ، مما جعلني أقل ثقة بالنفس واحترامًا لذاتي.	أعترف أنه من المشكلات الشائعة أن تشعر بعدم الرضا عن شكلك وجسدك. يمكن للضغوط المجتمعية والمعايير الجمالية أن تؤثر على تصوراتنا عن أنفسنا. إليك بعض النصائح التي قد تساعدك في تعزيز ثقتك بالنفس واحترامك لذاتك: 1. قبول الذات: قبل نفسك بما أنت عليه الآن. قد يكون هناك بعض الأشياء التي ترغب في تحسينها ، ولكن القبول والتقدير لنفسك كما أنت هو خطوة مهمة. 2. التعبير عن مشاعرك: تحدث مع الأشخاص المقربين منك عن…
غالبًا ما أشعر بالوحدة والعجز ، كما لو أن لا أحد يفهمني حقًا ، وأجد صعوبة في التواصل مع الناس ، مما يزعجني ويجعل من الصعب إيجاد حل	أنا آسف لسماع ذلك. الشعور بالوحدة والعجز قد يكون تحديًا صعبًا. ومع ذلك ، هناك بعض الخطوات التي يمكنك اتخاذها للتعامل مع هذه الأحاسيس: 1. تصفح دوائرك الاجتماعية: حاول التواصل مع الأشخاص المهمين بالنسبة لك ، كأفراد الأسرة أو الأصدقاء المقربين. قد يساعدك الوقت الممضى معهم في التخلص من شعور الوحدة وتعزيز العلاقات القوية. 2. انضم لأنشطة اجتماعية: قم بالمشاركة في نشاط تهتم به ، مثل النوادي الاجتماعية أ…
بعد طلاق والدي ، كنت أعيش في منزل جدتي ، ورغم أنني أعيش مع والدتي ، إلا أنني أشعر دائمًا أنها أغرب من جدتي ، ولا أعرف كيف أتواصل معها.	فهمت تمامًا ما تشعر به. إقامة في بيئة جديدة وتواجه تحولات عائلية قد يكون صعبًا. هنا بعض النصائح التي قد تساعدك على تواصل أفضل مع والدتك: 1. تفهم الأوضاع: حاول أن تتعمق في أسباب الخلاف بين والدتك وجدتك والطلاق. فهم المشاعر والتجارب التي مرت بها العائلة من شأنه أن يساعدك على التعاطف والتفاهم. 2. التحدث بصراحة: قد يكون من المفيد التحدث إلى والدتك بصراحة حول مشاعرك وما تشعر به. اعطها فرصة للتعبير عن …
لدي إخفاقات أكثر من النجاحات ، وفي كثير من الأحيان أقنع نفسي أنه طالما أنني أعمل بجد ، ستكون هناك مكافآت ، لكن الحقيقة غالبًا ما تكون مخيبة للآمال	أعتقد أنه من المهم أن تعترف بالإخفاقات وتتعامل معها بشكل صحيح بدلاً من تجاهلها. هنا بعض النصائح التي قد تساعدك: 1. كن واقعياً: قد تكون تتوقع نتائج أفضل مما هي عليه بالفعل. حاول أن تكون واقعياً في تحديد أهدافك وتوقعاتك، وعدم الضغط على نفسك بإنجازات غير واقعية. 2. استفد من الأخطاء: اعتبر كل فشل كفرصة للتعلم والنمو. حاول تحديد الأسباب التي أدت إلى الفشل وتجنبها في المستقبل. اعتبر الأخطاء فرصة للتحسي…
لدي مشاعر خوف شديدة من أن شيئًا ما سيحدث ولا يمكنني تهدئة نفسي	أنا هنا لمساعدتك على التعامل مع خوفك الشديد. هنا بعض الخطوات التي يمكنك اتباعها: 1. التنفس العميق: خذ نفسًا عميقًا من خلال الأنف واحتفظ به لبضع ثوانٍ ثم أَخُرج الهواء ببطء. كرر هذه العملية عدة مرات، حيث إن التنفس العميق يساعد على هدؤ الجهاز العصبي. 2. تحديد الأفكار السلبية: حاول التركيز على الأفكار الإيجابية والتفكير الواقعي. قل لنفسك بأن الخوف ليس حقيقيًا وأنه لا يمكنه السيطرة عليك. 3. تفريغ الط…
أشعر أنني كنت في حالة ارتباك ، لا أعرف ما أريد وما يجب أن أفعله ، وهذا الأمر ايزعجني كثيرًا وأحيانًا يجعلني أشعر ببعض المشاعر السلبية.	أنا آسف لسماع ذلك. الشعور بالارتباك وعدم القدرة على تحديد ما تريد وما يجب عليك فعله يمكن أن يكون تحديًا صعبًا. هنا بعض الأفكار التي قد تساعدك في التعامل مع هذا الوضع: 1. حاول التفكير في أهدافك الطويلة والقصيرة المدى. قد تساعدك وضع خطة لتحقيق هذه الأهداف على توجيه اتجاهك واتخاذ القرارات الصحيحة. 2. قم بإعطاء نفسك الوقت والمساحة للاسترخاء وتفكير واضح. قد يكون من المفيد القيام بأنشطة تساعدك على تهدئ…
أشعر أحيانًا بالإحباط، ويصعب عليّ التخلص من المشاعر السلبية، كيف يمكنني تعديل حالتي النفسية؟	فيما يلي بعض النصائح التي يمكن أن تساعدك في تحسين حالتك النفسية: 1. التعرف على المشكلة: حاول تحديد الأسباب التي تؤدي إلى الإحباط والمشاعر السلبية. هل هناك ضغوط في العمل؟ هل تعاني من علاقات مشبوهة؟ لتحسين حالتك النفسية، يجب عليك معالجة المشاكل الأساسية. 2. التفكير الإيجابي: حاول تحويل تفكيرك من السلبي إلى الإيجابي. استبدل الأفكار السلبية بأفكار إيجابية وبناءة. قل لنفسك أنك قوي وتستطيع التغلب على ا…
أشعر دائمًا أنني لست جيدًا بما فيه الكفاية ، لست ذكيًا بما فيه الكفاية ، لست جميلة بما فيه الكفاية ، وغالبًا ما أرغب في تجميع نفسي بشكل مثالي لمنع الآخرين من رؤية أوجه القصور لدي	أعتقد أن العديد من الأشخاص يشعرون بنفس الشكل من الأحيان. ومع ذلك ، هناك بعض النصائح التي يمكن أن تساعدك في التغلب على هذه الأفكار السلبية: 1. قم بتقدير نفسك: حاول قبول نفسك بما أنك فريد وقيم بالطريقة التي أنت عليها. تذكر أن الكمال ليس واقعًا وأنه ليس مطلبًا للسعادة أو النجاح. 2. احتفظ بإنجازاتك: اكتب قائمة بإنجازاتك وقدراتك المختلفة واستعرضها عندما تشعر بالشكوك في نفسك. قد يتعين عليك إعادة التذكي…
غالبًا ما أشعر بالفراغ داخل نفسي ، حيث أفتقر إلى الإحساس الحقيقي بالانتماء والهدف	أنا آسف لسماع ذلك. الشعور بالفراغ ونقص الانتماء والهدف هي مشاعر شائعة وقد يكون من الصعب التعامل معها لوحدك. هنا بعض الخطوات التي يمكنك اتخاذها للتعامل مع هذه المشاعر: 1. التواصل مع الآخرين: حاول البحث عن أشخاص مثيرين للاهتمام والذين يشاركونك نفس الاهتمامات والقيم. قد يكون الانضمام إلى نادي أو مجموعة تطوعية أمرًا جيدًا لتوسيع دائرة معارفك والتواصل مع الآخرين. 2. العمل على النمو الشخصي: حاول تحديد …
عندما يضربني شخص ما أو يكملني ، أشعر دائمًا أنه يخونني فقط لأنني لا أستحق الاحترام	أعتذر لما تمر به من تجربة صعبة. إحساسك بأن الآخرين يضربونك أو يكملونك قد يكون مرتبطًا بثقتك الذاتية وصورتك الشخصية. من الطبيعي أن نشعر بالجفاء أو الغضب عند تعرضنا للإيذاء الجسدي أو اللفظي. ولكن يُفضل أن تعلم أن هذه الأفعال يرجع تأثيرها إلى العوامل الشخصية للشخص الآخر، وليس بالضرورة بسبب عدم قدرتك على أن تكون مستحقًا للإحترام. تذكّر أن العنف أو الإساءة ليست قبولًا في أي حالة، وأن أي شخص يرتكبها يت…
لقد كنت قلقة من تعرضي للنقد والحرمان من قبل الآخرين مما يؤدي إلى تدني الثقة بالنفس وانخفاضها ، فكيف يمكنني تحسين ثقتي بنفسي؟	فهمي لقلقك حيال تعرضك للنقد والحرمان من قبل الآخرين. هنا بعض الخطوات التي يمكن أن تساعدك في تحسين ثقتك بنفسك: 1. كن واعياً لمشاعرك: اعترفي بالمشاعر التي تشعرين بها وحاولي فهمها وقبولها بدون الحكم عليها. لا تتجنبي المشاعر السلبية، بل احتضنيها وتعاملي معها بشكل صحيح. 2. قيمي نفسك: اعترفي بقيمك واعتبريها هامة. حاولي أن تركزي على إيجابياتك وإنجازاتك بدلاً من التركيز على سلبياتك. قد تساعدك كتابة قائمة…
لا أعرف كيف أتعامل مع مشاعري ، غالبًا ما أنفجر بسبب الأشياء الصغيرة ، أشعر أنني لا أستطيع التحكم في مشاعري ، فهل هذا يعني أن لدي مشكلة نفسية؟	من الصعب تحديد ما إذا كانت لديك مشكلة نفسية أو لا بناءً على هذه المعلومات القليلة. ومع ذلك ، إذا كنت تشعر بعدم القدرة على التحكم في مشاعرك وتجاوزها ، فقد يكون من المفيد البحث عن مساعدة من محترف مثل مستشار نفسي أو طبيب نفسي. يمكنهم تقييم الوضع بدقة وتقديم الدعم والأدوات المناسبة للتعامل مع المشاعر وتحسين الصحة العقلية. قد تكون الأسباب المحتملة لصعوبة التحكم في المشاعر تشمل التوتر النفسي أو القلق أ…
أنا مليء بالخوف وعدم اليقين بشأن المستقبل ، لا أعرف أي طريق يجب أن أسلكه ، أشعر بالضياع الشديد كل يوم	أدرك تمامًا صعوبة الشعور بالخوف وعدم اليقين بشأن المستقبل. لكن دعني أقدم لك بعض النصائح التي قد تساعدك في التعامل مع هذه المشاعر: 1. أصبح على دراية بمشاعرك: قم بتحليل مدى تأثير الخوف وعدم اليقين على حياتك اليومية. اعترف بأنها مشاعر حقيقية لديك وتعامل معها بشكل صحي. 2. حدد مصادر القلق: حاول تحديد الأمور التي تسبب لك القلق والضياع. ربما هي مصدر من الأحداث في حياتك الشخصية أو المهنية. عندما تعرف الم…
لطالما كنت أعاني من اضطراب الوسواس القهري. غالبًا ما يتعين علي التحقق بشكل متكرر مما إذا كانت الأبواب والنوافذ مغلقة ، وما إذا كانت الأجهزة الكهربائية مغلقة ، وما إلى ذلك. إذا تعذر تلبية هذه المتطلبات ، فسوف أشعر بالانزعاج والخوف الشديد .. هذا يؤثر على حياتي اليومية والعملية .. أريد أن أعرف كيف أتخلص من هذه المشكلة.	أنا آسف لسماع ذلك، اضطراب الوسواس القهري قد يكون تحديًا قويًا للتعامل معه. إليك بعض النصائح التي قد تساعدك في التخلص من هذه المشكلة: 1. التوعية: تعلم المزيد عن اضطراب الوسواس القهري وفهم الأسباب المحتملة لحدوثه والتأثيرات التي يمكن أن يكون لها على حياتك اليومية. قد يساعدك فهم هذا الاضطراب على التحكم فيه بشكل أفضل. 2. البحث عن دعم: يمكن أن يكون الاضطراب القهري عبئًا نفسيًا وعاطفيًا كبيرًا. قم بالب…
أشعر أحيانًا بالملل، ولا أعرف ماذا أفعل، ولا أعرف ما يخبئه لي المستقبل، وأشعر بالفراغ الشديد.	في بعض الأحيان، يمكن أن يشعر الشخص بالملل أو الفراغ الشديد. هناك بعض الأشياء التي يمكنك القيام بها لتغيير هذا الشعور: 1. ابحث عن هوايات جديدة: تجربة أنشطة مختلفة وجديدة يمكن أن تساعد في تحفيز العقل والروح وتخلق مشاعر من المرح والسعادة. 2. اقرأ كتاباً جديداً: القراءة تعتبر طريقة رائعة للاستمتاع بالوقت واكتشاف عوالم جديدة. 3. اخرج وتواصل مع الآخرين: الانخراط في الأنشطة الاجتماعية يمكن أن يكون مفيدا…
كنت أرغب دائمًا في إنجاب طفل ، لكن عندما كنت حاملًا ، شعرت دائمًا أنني لست على استعداد لأكون أماً جيدة	فهم هذا الشعور طبيعي تمامًا ولا يجب أن يشعر بالذنب أو القلق. يمكن أن يكون الأمر مثيرًا للقلق بالنسبة للعديد من الأشخاص، حيث يخشون عدم القدرة على توفير الرعاية اللازمة أو الحب والدعم الكافي للطفل. من المهم أن تعلمي أن الأمور ستتحسن مع الوقت والتجربة. تعلم كيف تكون أمًا جيدة هو عملية تتطلب الكثير من التعلم والتكيف. يمكنك البدء بقراءة الكتب والموارد المتاحة حول الأمومة والعناية بالأطفال. بالإضافة إل…
كنت دائمًا قلقة على جسدي وصحتي ، خوفًا من إصابتي بأمراض مختلفة ، مما جعلني أشعر بالتوتر الشديد والقلق.	فهمي تمامًا مشاعر القلق والتوتر الذي تعاني منه. إليك بعض النصائح التي قد تساعدك في التغلب على هذه المخاوف: 1. العناية بالجسم: اعتني بجسدك من خلال تناول وجبات صحية وتوفير النشاط البدني اللازم يوميًا. حافظ على نمط حياة صحي ومنتظم. 2. الاسترخاء والتأمل: حاول تخفيف التوتر والقلق من خلال ممارسة التأمل أو الاسترخاء العميق. يمكن استخدام تقنيات التنفس العميق والتأمل الهادئ لتهدئة العقل. 3. المعرفة العقلي…
أنا شديد الوعي بالذات ومن الصعب إرضائي بشأن مظهري وشكلي ، وغالبًا ما أقع في نوع من التصحيح الذاتي والتغيير اللانهائي	من الجيد أن تكون شديد الوعي بالذات ولا تقبل أي شيء أقل من الأفضل بالنسبة لك. ومع ذلك ، قد يكون من الصعب الوفاء بمعايير مرتفعة جدًا والتركيز على التحسين المستمر. هنا بعض النصائح التي قد تساعدك: 1. قبل نفسك كما أنت: حاول أن تقبل نفسك وتحب نفسك كما أنت في الوقت الحالي. لا تتوقع الكمال ، بل اعتمد على قوة وجمالك الفريد. 2. حدد الأولويات: افحص ما هو حقاً مهم بالنسبة لك بدلاً من أن تضغط على نفسك في كل ج…
تعد صعوبات التعلم شائعة ويمكنك جعل التعلم أكثر متعة من خلال معاملته كلعبة	من خلال تغيير نظرتك إلى عملية التعلم ومعاملتها كلعبة، يمكنك جعلها أكثر متعة وسهولة. هنا بعض النصائح لمساعدتك في ذلك: 1. اختر موضوعات تثير اهتمامك: اختار مواضيع تشد انتباهك وتثير شغفك. ستكون الرغبة الشخصية في التعلم هي المحرك الأساسي وستجعل العملية أكثر متعة. 2. قم بتحويل الدروس إلى ألعاب: جرب استخدام طرق التعلم التفاعلية والألعاب لتوسيع مفاهيمك. يمكنك إنشاء ألعاب أو البحث عن تطبيقات وموارد تعليمي…
من الواضح أنني أريد أن يكون لدي شخص أعتمد عليه ، لكنني لا أعرف كيف أقترب منه ، وفي كل مرة أحاول ألقى الفشل، وبعد ذلك أفقد شجاعتي وأعود إلى النقطة الأصلية.	فهمت تماماً مشاعرك وتحدياتك في الوقوف وجهاً لوجه مع الآخرين وتكوين علاقات قوية. هنا بعض الخطوات التي يمكن أن تساعدك في الاقتراب من الشخص الذي ترغب في أن تعتمد عليه: 1. كون ثقة في نفسك: قبل أن تقترب من الشخص، حاول أن تدرك قيمتك وأن تكون واثقاً من نفسك وقدراتك. تذكر أن هناك شيء فريد تقدمه وأنك لديك الحق في إقامة علاقة جيدة مع الآخرين. 2. قم بالاستعداد للمحادثة: قبل أن تبدأ في الاقتراب من الشخص، حاو…
أجد أن اهتمامي وحماسي للأشياء ينخفضان أكثر فأكثر، وأشعر دائمًا بحافز أقل لفعل أي شيء، فهل هذه مشكلة تتعلق بالصحة النفسية؟	قد تكون تجربة انخفاض الاهتمام والحماس في الأشياء مؤشرًا على مشكلة في الصحة النفسية. قد تكون هذه الأعراض تشير إلى انخفاض الرغبة أو السعادة أو التوتر الزائد أو الاكتئاب. إذا كنت تعاني من هذه الأعراض لفترة طويلة أو إذا كانت تؤثر سلبًا على حياتك اليومية وعلاقاتك، فقد يكون من الأفضل مراجعة الطبيب أو الاستشاري النفسي لتقييم وتشخيص الوضع وتقديم المساعدة المناسبة.
الضغط النفسي المنتظم سيؤثر على استقرارنا العاطفي وقد يؤثر على صحتنا الجسدية ، يجب أن نقوم بعمل جيد في تنمية الجودة النفسية وتنفيذ التثقيف الصحي النفسي	موافق عليك تماما! الضغط النفسي المنتظم يمكن أن يؤثر بشكل كبير على استقرارنا العاطفي والصحة الجسدية. لذلك، من الضروري أن نعمل على تعزيز الصحة النفسية وتنمية الجودة النفسية بشكل جيد. يمكننا تحقيق ذلك من خلال العديد من الطرق المثبتة علميا. قد تشمل بعض الإجراءات المهمة التالية: - تعلم تقنيات التفكير الإيجابي وممارستها في حياتنا اليومية، حيث يمكن للتفكير الإيجابي أن يساعد في تحسين المزاج والعمل على تق…
تم احتجازي بشكل غير قانوني ليلة واحدة ، تعذيبي لدرجة الوهن ، أبكي وحدي في الزاوية ، فقط الدموع أضاءت الظلام	أعتذر لسماع ذلك. إذا كنت تعتقد أنك تعرضت لاحتجاز غير قانوني وتعذيب، فمن الضروري أن تتواصل مع الجهات المختصة في بلدك لتقديم طلب للمساعدة والتقرير عن هذه الحالة. قد تتضمن الجهات المختصة الشرطة المحلية أو السفارة أو المنظمات الحقوقية المحلية. قد يتمكنون من تقديم الدعم والمساعدة في تحقيق العدالة وحماية حقوقك.
فيما يتعلق بالصحة العقلية للمراهقين ، من المهم جدًا معرفة كيفية إقامة علاقة صحية وكيفية التعبير عن مشاعرك ومطالبك بشكل صحيح	بالتأكيد ، الصحة العقلية للمراهقين مهمة جدًا وينبغي إعطاؤها الاهتمام الكافي. هنا بعض النصائح لبناء علاقة صحية والتعبير عن مشاعرك ومطالبك بشكل صحيح: 1. التواصل الفعال: تعلم كيفية التواصل بفعالية مع الآخرين، حيث يمكنك التعبير عن مشاعرك ومطالبك بوضوح واحترام. حاول استخدام اللغة الواضحة والمباشرة واستمع بتركيز للطرف الآخر لفهم وجهات نظره ومشاعره. 2. بناء الثقة: حاول بناء ثقة قوية مع الآخرين ، وذلك من…
كنت أعاني من الكوابيس كثيرًا مؤخرًا ، وهذه الأحلام تجعلني أشعر بالخوف وعدم الارتياح ، بل إنها تؤثر على جودة نومي وحياتي اليومية.	أنا آسف لسماع ذلك. الكوابيس يمكن أن تكون مزعجة جدًا وتؤثر على حالتك النفسية والصحية بشكل عام. هنا بعض النصائح التي قد تساعدك في التعامل مع الكوابيس: 1. ممارسة الاسترخاء وتقنيات التأمل: حاول تخفيف التوتر والقلق وتهدئة عقلك قبل النوم باستخدام تقنيات التأمل ، مثل التنفس العميق وتصور الأماكن المريحة. 2. إقرأ قصصًا إيجابية قبل النوم: قبل الذهاب إلى الفراش ، جرب قراءة قصة مشجعة أو إيجابية للمساعدة في إ…
أنا دائمًا شديد القلق وأشعر بالتوتر بشأن سير الأمور، خاصة الأشياء الصغيرة، يمكنها أن تجعلني أيضًا أشعر بعدم الاطمئنان وعدم الارتياح	أنا هنا لمساعدتك في التعامل مع القلق والتوتر الذي تشعر به. هنا بعض النصائح التي قد تساعدك: 1. تحديد الأسباب: حاول معرفة الأسباب التي تؤدي إلى القلق والتوتر. هل تأتي من ظروف العمل؟ العلاقات الشخصية؟ القضايا المالية؟ 2. تذكير نفسك بالواقع: قد تكون المخاوف غير مبررة أو مبالغ فيها. قبل أن تتوتر بشأن شيء، حاول تقييم الوضع بشكل منطقي وتذكر أن الأمور قد تكون أفضل من ما تتخيل. 3. العناية بالنفس والاسترخا…
لا أستطيع إيقاف أفكاري السلبية ، أحيانًا حتى عندما لا تكون الأمور بهذا السوء ، لا أزال أفكر في الأسوأ ، أشعر بالاكتئاب الشديد والعجز ، أشعر أنني لن أتمكن أبدًا من التخلص من هذه المشاعر.	أعتقد أنه من المهم أن تعرف أنك لست وحدك في هذه الصعوبة. العديد من الأشخاص يمرون بتجارب مماثلة ولكن هناك طرق للتعامل مع الأفكار السلبية والاكتئاب الشديد. إليك بعض النصائح التي يمكن أن تساعدك: 1. تحدث مع أشخاص موثوق بهم: حاول مشاركة ما تشعر به مع أحد الأصدقاء المقربين أو العائلة. قد يكون الحديث عن المشاعر والأفكار السلبية الخاصة بك مفيدًا للتخفيف من العبء وتشعر بالدعم. 2. ممارسة الرياضة البدنية: ال…
أشعر أن حياتي مملة وتفتقر إلى الشغف والتحفيز ، مما يجعلني أشعر بالاكتئاب والضياع	أنا آسف لسماع ذلك. إليك بعض الأفكار التي قد تساعد في إعادة حيوية حياتك وتعزيز شغفك وتحفيزك: 1. اكتشف اهتماماتك: حاول تحديد الأنشطة التي تستمتع بها حقًا. قد يكون هناك هوايات تود استئنافها أو تعلم مهارات جديدة في مجال معين. هذا قد يساعدك في إيجاد شغف جديد في حياتك. 2. حدد أهدافًا وتحدَّيات: حدد أهدافًا واقعية قصيرة وطويلة المدى، قد تساعدك على الشعور بالتحفيز والإنجاز. اكتب الأهداف الخاصة بك واعمل ع…
غالبًا ما أعاني من الأرق ، وأستلقي في الفراش ليلًا أفكر في العمل والأعمال المنزلية والعلاقات ، مما يجعلني غير قادر على التركيز خلال النهار ، وكفاءة العمل منخفضة ، ويصبح مزاجي سيئًا للغاية.	يمكن أن يكون الأرق مشكلة شائعة ومزعجة للكثير من الناس. إليك بعض النصائح التي قد تساعد في تحسين نومك ومزاجك: 1. إنشاء روتين للنوم: حاول أن تواظب على الخلود إلى النوم والاستيقاظ في نفس الأوقات يومياً. قد يساعد ذلك في تعزيز عملية الاسترخاء وتحسين جودة النوم. 2. قم بإنشاء بيئة مناسبة للنوم: جعل غرفة النوم هادئة ومظلمة ومريحة. قد تساعد في استخدام سماعات الأذن أو قناع العين لتقليل الاضطرابات الخارجية. …
عندما أواجه انتكاسات وخيبات أمل، أعتقد أن الطريقة الوحيدة لأن أكون آمنًا هي أن أنسى كل شيء.	فهمي أن عند مواجهة الانتكاسات والخيبات، قد تشعر بالرغبة في نسيان كل شيء لتتجنب الألم أو الاحباط. ومع ذلك، أود أن أشارك معك بعض النصائح التي قد تساعدك على التعامل مع هذه المواقف بشكل أفضل: 1. قم بتقبل المشاعر: من الطبيعي أن تشعر بالحزن أو الإحباط بعد انتكاسة. اقبل هذه المشاعر واعطِها الوقت للمرور. 2. تعلم من التجارب السابقة: حاول استخلاص الدروس والتعلم من مواقفك السابقة. قد يساعدك ذلك على تجنب الأ…
غالبًا ما أشعر بالتعب والضعف ، حتى عندما لا أقوم بعمل بدني ، أعاني أيضًا في كثير من الأحيان من الأرق ، مما يجعلني أشعر بعدم الارتياح والاضطراب الشديد	أعتذر لسماع ذلك. قد يتسبب الشعور بالتعب والضعف والأرق من عدة أسباب محتملة. من الممكن أن تكون لديك نقص في العناصر الغذائية الأساسية مثل الحديد أو فيتامين ب12، أو قد تعاني من التوتر والقلق أو الاكتئاب. يمكن أن يسبب الأرق أيضًا الألم المزمن أو الاضطرابات الهضمية. من الضروري استشارة الطبيب لتقييم حالتك وتحديد السبب المحتمل لأعراضك. يمكن للطبيب أن يطلب بعض الفحوصات المخبرية لتحديد مستويات العناصر الغذ…
أعاني أحيانًا من الاكتئاب ، ولا أستطيع تناول الطعام بشكل طبيعي ، ثم أتحكم في طعامي لأنني أخشى أن يراني الناس أنحف	أنا آسف لسماع ذلك. الاكتئاب يمكن أن يؤثر على الشهية وقدرتك على تناول الطعام بشكل طبيعي. إليك بعض النصائح التي قد تساعدك: 1. حاول تناول وجبات صغيرة ومتكاملة بشكل منتظم على مدار اليوم. قد يكون من الصعب تناول وجبات كبيرة في وقت واحد، لذلك حاول قسمة الوجبات إلى وجبات صغيرة عديدة تناولها على مدار اليوم. 2. ابحث عن الأطعمة التي تعجبك وتستتوي بها. حاول تناول الأطعمة المفضلة لديك حتى ولو لم يكن لديك شهية…
ينتقدني والداي دائمًا فهما أفعل يكون ليس جيدًا بما يكفي ، فهو يجعلني أشعر بالاكتئاب الشديد وخيبة الأمل ، أشعر أنني لن أتمكن أبدًا من الحصول على موافقتهم ومدحهم	أعلم أنه يمكن أن يكون من الصعب أن تشعر بالاكتفاء والراحة عندما ينتقدك الأهل أو يجعلونك تشعر بخيبة الأمل. ومع ذلك، هنا بعض الأفكار التي قد تساعدك: 1. حاول فهم الأسباب وراء انتقادهم: قد يكون لديهم توقعات محددة أو قد يكونون يحاولون توجيهك نحو طريق معين. حاول التواصل ومعرفة سبب انتقادهم. 2. كن صبورًا ومتفهمًا: قد يكون لديهم مخاوفهم الخاصة ويرغبون في أفضل لك. حاول أن تظهر لهم أنك تهتم بملاحظاتهم وتسعى…
لطالما كانت علاقتي العاطفية غير مستقرة للغاية، ودائمًا ما تتحكم المشاعر بي، وغير قادر على الحفاظ على علاقتي بطريقة صحية	أعتقد أنه من المهم أن تعيش حياة عاطفية صحية ومستقرة. هنا بعض النصائح التي قد تساعدك في تحقيق ذلك: 1. قم بتحديد احتياجاتك وانتظاراتك: قبل أن تدخل في علاقة جديدة، حدد ما تبحث عنه في شريك حياتك وما هي توقعاتك. يساعد ذلك في تحديد الأشخاص المناسبين لك. 2. تواصل بوضوح: كون على اتصال مفتوح وصادق مع شريكك. تحدث عن مشاعرك واحتياجاتك واستمع إلى ما يقوله شريكك. الاتصال الجيد يؤسس لعلاقة قوية ومستقرة. 3. اهت…
عانت شياو لينغ من التنمر في الكلية مما جعلها أقل شأناً واكتئاباً ، كيف يمكنني مساعدتها على إعادة بناء ثقتها بنفسها وصحتها العقلية؟	هنا بعض الطرق التي يمكنك محاولتها لمساعدة شياو لينغ في إعادة بناء ثقتها بنفسها وصحتها العقلية: 1. كن داعمًا: تأكد من أنها تعرف أنك متواجد لدعمها في أي وقت. استمع إلى مشاكلها وأحكامها بفتح ذراعيك ودون أي انتقاد. 2. تعزيز الصداقات الإيجابية: شجعها على التواصل مع أصدقاء يفهمونها ويدعمونها. قد تساعدها علاقات إيجابية في الشعور بالانتماء وقبول النفس. 3. تشجيع النشاط البدني والرياضة: يمكن أن يساعد النشا…
كانت علاقات عائلتي معقدة وكنت في كثير من الأحيان متوترة وغير آمنة ولم أكن أعرف كيف أتعامل معها أو من الذي ألجأ إليه للحصول على المساعدة.	أنا آسف لسماع ذلك. إذا كنت تبحث عن المساعدة في التعامل مع علاقات عائلتك المعقدة والتوترات المستمرة، هنا بعض النصائح التي قد تفيدك: 1. ابحث عن دعم خارجي: قد يكون لديك أصدقاء مقربين أو أفراد آخرين من العائلة يمكنك التحدث إليهم والاعتماد عليهم للحصول على الدعم العاطفي والاستشارة. 2. استخدم الموارد المتاحة: هناك العديد من الموارد المتاحة للدعم العائلي مثل الجمعيات الخيرية والمنظمات الاجتماعية التي يم…
لدي صديق يشتكي دائمًا بشكل سلبي وليس لديه موقف إيجابي تجاه أي شيء ، أعتقد أن سلبيته تؤثر على مشاعري ، لكنني لا أعرف كيف أتواصل معه	إذا كان لديك صديق يشتكي دائمًا وليس لديه نظرة إيجابية تجاه الأمور، فقد يكون من المهم أن تتحدث معه بصورة مباشرة. إليك بعض النصائح التي قد تساعدك في التواصل معه: 1. اكتشف أسباب سلبية صديقك: قد يكون هناك أسباب خاصة لسلبية صديقك، قد تتعلق بالعمل أو العلاقات الشخصية أو غيرها. حاول أن تتمنّع عن الحكم عليه واكتشف الأسباب المحتملة لشعوره السلبي. 2. اعرض مشاعرك: اجلس مع صديقك واخبره بكيفية تأثر مشاعرك بسل…
في الآونة الأخيرة ، اكتشفت أنني أعاني دائمًا من الأرق ، حتى عندما أنام ، أعاني من كوابيس ، وأشعر بثقل بعد الاستيقاظ ، فماذا أفعل؟	يمكن أن يكون الأرق والكوابيس والشعور بالثقل بعد الاستيقاظ علامات على وجود اضطراب نوم. هنا بعض النصائح التي يمكن أن تساعدك في التعامل مع هذه المشكلة: 1. تحسين الراحة: حاول جعل بيئة النوم مريحة ومهيأة للراحة. استخدم مرتبة مريحة ووسائد ناعمة وروتين مهدئ قبل النوم. 2. ممارسة الرياضة اليومية: ممارسة التمارين الرياضية بانتظام يمكن أن تسهم في تحسين نوعية النوم. حاول ممارسة التمارين الرياضية في الصباح أو…
أحيانًا عند الدردشة مع الأصدقاء ، أشعر دائمًا أن المحادثة انتهت وليس هناك ما أقوله	إذا كنت تشعر بأن المحادثة قد انتهت وتجد صعوبة في إيجاد مزيد من المواضيع للحديث، فإليك بعض الأفكار التي قد تساعدك: 1. اسأل أصدقائك عن أمور حياتهم الشخصية أو العملية - يمكن أن تسأل عن كيفية قضاء عطلة نهاية الأسبوع أو عن أحداث مهمة في حياتهم. 2. قدم مواضيع جديدة أو مثيرة - يمكنك طرح موضوع جديد أو طرح سؤال مثير للاهتمام مثل أفلام أو مسلسلات تلفزيونية حديثة أو أخبار عامة. 3. شارك قصصًا شخصية - يمكنك م…
يتعرض طفلي للتنمر في المدرسة وهو الآن منعزل للغاية ولا أعرف كيف أساعده	أنا آسفة لسماع ذلك. التنمر يمكن أن يكون تجربة صعبة للأطفال ويحتاجون للدعم والمساعدة من قبل الكبار. هنا بعض الخطوات التي يمكنك اتخاذها لمساعدة طفلك: 1. الاستماع والتواصل: تحدث مع طفلك بدون انتقاد واستمع بعناية إلى مشاعره وتجاربه. ضعه في الصورة واشرح له أنك موجود لمساعدته. 2. تشجيع الثقة بالنفس: ساعد طفلك على بناء ثقته بالنفس من خلال تعزيز إيجابياته ومهاراته واهتم بتطوير مواهبه. 3. التحدث إلى المدر…
عندما أتواصل مع الناس ، أشعر دائمًا بالتوتر الشديد ، ولا أعرف ماذا أقول ، وأخشى أن أقول شيئًا خاطئًا.	فهمك تمامًا. يمكن أن يكون التواصل مع الناس مُرهِقًا بالفعل لبعض الأشخاص. ولكن هناك بعض النصائح التي يمكن أن تساعدك على التغلب على هذا التوتر: 1. كن مستعدًا: قبل أن تتحدث مع أي شخص، قم بالتحضير المسبق وفكر في الموضوعات التي ترغب في مناقشتها معهم. 2. ضع خطة: حدد أهدافك للمحادثة وما ترغب في تحقيقه من خلالها. هذا سيعطيك ثقة ووضوح حينما تتحدث. 3. استمع بعناية: كن حاضرًا في المحادثة واستمع بعناية للطرف…
عندما أكون وحدي ، أبدأ في الشعور بالخوف لا يمكن تفسيره ، تتحكم فيه قوة غير مرئية عن غير قصد ، أشعر بأنني محاصر في قشرة لا يمكن اختراقها ، وأحيانًا يكون كل شيء مخيفًا بشكل رهيب	أعتذر للشعور بالخوف الذي تشعر به عندما تكون وحيدًا. يمكن أن يكون الشعور بالخوف غير المبرر عندما تكون لوحدك مؤلمًا وصعبًا. هناك العديد من الأسباب المحتملة التي يمكن أن تؤدي إلى هذا الشعور بالخوف والعجز عن تفسيره، بما في ذلك القلق الاجتماعي، الرهاب، أو حتى الاكتئاب. قد يكون من المفيد التحدث إلى مساعدة متخصصة في الصحة العقلية لمساعدتك في استكشاف مصدر الخوف وطرق التعامل معه بشكل صحيح. قد يقدمون لك ال…
إنني أقسو على نفسي دائمًا، وأشعر بأنني لست جيدًا بما يكفي لأحظى حب الآخرين وتقديرهم	أعتذر لسماع ذلك. قد يكون من الصعب على الناس أحيانًا تقدير أنفسهم والاعتراف بقيمتهم. ولكن هناك طرق يمكن أن تساعدك في التغلب على هذا الشعور السلبي وبدء الاهتمام بنفسك بشكل أفضل. 1. كن لطيفًا مع نفسك: حاول تغيير الأفكار السلبية والنقد الذي توجهه إلى نفسك، واستبدلها بأفكار إيجابية ومشجعة. 2. احتفظ بقائمة بالإنجازات: اكتب قائمة بأنجازاتك، حتى الصغيرة، واعتبرها كتذكير بقدراتك وإمكاناتك الحقيقية. 3. قم …
حياتي هي عبارة عن إخفاقات مستمرة، ألقى الفشل مهما فعلت، أشعر أنني لا قيمة لي	أعتذر لسماع ذلك. يمكن أن يكون من الصعب التعامل مع سلسلة من الإخفاقات والشعور بالقلة قيمة. ولكن يجب أن تعلم أن الفشل هو جزء طبيعي من رحلة الحياة ويمكن أن يكون أحيانًا فرصة للتعلم والنمو. هنا بعض النصائح التي قد تفيدك: 1. قبل الفشل كجزء من التجارب والمحاولات لتحقيق النجاح. انظر إلى الفشل كفرصة للتعلم وتحسين الأمور في المستقبل. 2. كن صبورًا مع نفسك ولا تكن قاسيًا عليها. اعتبر الأخطاء والإخفاقات كفرص…
لطالما تعرضت للتخويف، واحتقار الناس لي، وشعرت بأنني غير مجدي وغير كفؤ، وغير قادر على إظهار قوتي الحقيقية وقدرتي في المواقف الاجتماعية ، مختبئًا دائمًا في الزاوية	أنا آسف لسماع ذلك. يمكن أن يكون التعرض للتخويف والاحتقار صعبًا ومؤثرًا على تقدير الذات. قد تكون هذه الأفكار السلبية تؤثر على وجهة نظرك الشخصية وتمنعك من الاستفادة من قوتك وقدراتك الحقيقية. هنا بعض الأفكار التي قد تساعدك في التعامل مع هذه المشاعر: 1. تصدى للأفكار السلبية: حاول التحدث إلى نفسك بإيجابية ورفع مستوى تقديرك لذاتك. تذكر أنك تستحق الاحترام والتقدير، وأن قيمتك ليست مرتبطة برأي الآخرين. 2.…
أشعر بالارتباك والعجز حيال المستقبل ، ولا أعرف ما يجب أن أفعله ، ولا أعرف ماذا أريد.	أنا أعتقد أنه من الطبيعي أن تشعر بالارتباك والعجز في بعض الأحيان بشأن المستقبل وما يجب عليك فعله. لكن لا تقلق، هناك بعض الخطوات التي يمكنك اتخاذها للتركيز على ما ترغب فيه وتحقيق رؤية ناجحة للمستقبل. أولاً، حاول أن تستعرض أهدافك وتطلعاتك، وتحديد ما ترغب في تحقيقه في المستقبل. اطلب من نفسك أسئلة مهمة مثل: ما هي أحلامك ورغباتك الشخصية؟ ما هو العمل الذي يلهمك ويبدعك؟ ما هي قيمك الأساسية؟ ثانيًا، قم ب…
لا أعرف لماذا أفكر دائمًا كثيرًا ، وأقلق بشأن المستقبل ، وأضطر إلى إعادة التحقق من إغلاق الباب وإغلاق النوافذ في كل مرة أخرج فيها ، مما يجعلني أشعر بالتعب الشديد وسرعة الانفعال	قد يكون لديك اضطرابات القلق التي تؤثر على رؤيتك العامة للأمور وتسبب التوتر والتعب الشديد. من الجيد أنك تعرف عن هذه الأعراض وتسأل عنها. يُنصح بمراجعة الطبيب أو الاستشاري النفسي لتقييم حالتك وتشخيص اضطرابك وتقديم العلاج المناسب لك. قد يقترح المختصون بعض الاستراتيجيات والتقنيات مثل العلاج السلوكي المعرفي أو العلاج الدوائي للمساعدة في التغلب على هذه الأعراض. كما يمكن أن يكون لديهم أيضًا نصائح وتوجيها…
أنا أتعرض لاعتداء جنسي منذ فترة طويلة ولكني ما زلت أشعر بالألم والضيق ، كيف يمكنني التعامل مع هذا الأذى في الماضي؟	أعتذر لسماع ذلك. إن تجربة الاعتداء الجنسي قد تكون مؤلمة وصعبة جدًا. هنا بعض الخطوات التي يمكنك اتباعها للتعامل مع الألم والضيق الناجمين عن هذه التجربة: 1. البحث عن الدعم: تحدث مع أحد الأشخاص الموثوق بهم والذي يمكن أن يقدم الدعم العاطفي لك، مثل أحد أفراد العائلة أو صديق قريب. إذا لم تتمكن من العثور على دعم من حولك، فاستشر مساعدة احترافية مثل مستشار نفسي أو طبيب نفسي. 2. تعلم التقبل والغفران: يمكن …
شعرت أن حياتي تفتقر إلى المعنى والهدف ، وأنني لم أجد ما أريد فعله حقًا ، وكان هذا الشعور بالضياع مؤلمًا للغاية.	أنا آسف لسماع ذلك. يمر الكثير من الأشخاص بفترات من الشعور بالضياع وعدم وجود هدف في حياتهم. هنا بعض النصائح التي قد تساعدك على إيجاد المعنى والهدف في حياتك: 1. قم بتحديد قيمك واهتماماتك: اجلس واعتبر ما الذي يعنيه لك الأهمية وما الذي يثير اهتمامك. قد تجد الإجابة على أسئلة مثل: ماذا يمكن أن يجعلني سعيدًا؟ وما هي الأشياء التي أنا متحمس لتحقيقها؟ 2. اكتشف شغفك: حاول اكتشاف ما يحركك وما يمنحك شعورًا با…
ذات يوم، وجدت طريقة للهروب من عالمي الواقعي، وهو وضع رأسي على الأريكة، وسد أذني، وعدم الاستماع إلى الصوت الخارجي، حتى أتمكن من الانغماس تمامًا في عالم مع نفسي فقط، عندما سقطت في هذا العالم، اختفت كل المشاكل.	يبدو أن اكتشافك لهذه الطريقة للهروب من الواقع قد أعطاك بعض الراحة والسلام النفسي. قد يكون استغلال الوقت لتجربة هذه الأوقات المنعزلة والمريحة هاماً لتجديد طاقتك والتخلص من الضغوط اليومية. ومع ذلك، يجب ألا ننسى أهمية الاستماع والتفاعل مع العالم الخارجي والأشخاص المحيطين بنا. إذا كانت المشاكل لا تزال مؤثرة عليك في العالم الحقيقي، فقد تكون من الصعب تجاهلها بالكامل. قد تكون من الفائدة التعامل معها بشك…
غالبًا ما أشعر بالوحدة والعجز ، وأشعر بأنني غير مفهومة أو مدعومة من قبل أي شخص ، حتى عندما يكون هناك أشخاص من حولي ، أشعر بالعزلة والغربة ، هذه المشاعر تجعلني مكتئبًا وسلبيًا للغاية ، وأحيانًا تثير القلق وأعراض الاكتئاب	أنا آسف لسماع ذلك. يمكن أن تكون هذه المشاعر صعبة جدًا. هنا بعض النصائح التي قد تساعدك: 1. التواصل: حاول التحدث إلى أشخاص في حياتك الذين يمكنهم فهمك ودعمك. قد يكونون أفراد العائلة أو الأصدقاء المقربين. مشاركة مشاعرك وأفكارك يمكن أن يخلق شعورًا بالاتصال والتفهم. 2. الاهتمام بالنفس: اعتنِ بنفسك عن طريق ممارسة الرياضة والحفاظ على نظام غذائي صحي والحصول على قسط كافٍ من الراحة والنوم. الاسترخاء والاستج…
كلمة واحدة منك يمكن أن تحطم قلبي	محاولة
أنا غير راضٍ تمامًا عن شكلي ومظهري، وغالبًا ما أعاني من تدني احترام الذات والقلق	أنا آسف لسماع ذلك. يمكن أن يكون من الصعب التعامل مع مشاعر عدم الرضا عن النفس والقلق. فيما يلي بعض الأفكار التي قد تساعدك: 1. تأكد من أنك تدرك أن الجمال الحقيقي يأتي من الداخل ولا يتعلق بالمظهر الخارجي فقط. حاول التركيز على صفاتك الإيجابية وإبرازها. 2. حاول التحدث مع أحد الأشخاص المقربين والموثوق بهم، مثل الأصدقاء أو أفراد العائلة، حول مشاعرك والقلق الذي تشعر به. قد يكونون قادرين على تقديم الدعم و…
لا أعرف حقًا ما أفعله، ليس لدي أدنى فكرة عندما أفعل أي شي، هذا يجعلني محبط	أنا هنا لمساعدتك وتقديم التوجيه. إليك بعض الخطوات التي يمكنك اتخاذها للتخلص من الإحباط: 1. تعرف على قواك واهتماماتك: قم بتحليل مهاراتك واهتماماتك وتحديد المجالات التي تستمتع بها وتمتلك خبرة فيها. قد تكون قادرًا على العثور على هدف أو اتجاه للعمل من خلال ذلك. 2. حدد أهدافًا صغيرة وملموسة: اكتب أهدافًا قصيرة المدى التي يمكنك تحقيقها في الوقت الراهن. قد تعمل على تحسين مهارة معينة أو إكمال مشروع صغير.…
لدي الكثير من الخوف الاجتماعي ، لا أجرؤ على التواصل مع الغرباء ، ولا أحب الظهور في الأماكن المزدحمة ، أتمنى أن أتغلب على هذه المخاوف	يمكنك اتخاذ عدد من الخطوات للتغلب على الخوف الاجتماعي. هنا بعض النصائح التي قد تساعدك: 1. تحديد أهداف صغيرة: بدلاً من محاولة التغلب على جميع المخاوف في آن واحد، قم بتحديد أهداف صغيرة وتدريجياً زيادة تحليقك في مواجهة مخاوفك الاجتماعية. 2. الممارسة: ممارسة الاجتماع والتواصل مع الأشخاص الجدد عن طريق المشاركة في أنشطة اجتماعية ممتعة. قد تبدأ بزيارة الأماكن الهادئة أو الذهاب إلى الأماكن المزدحمة في أو…
يعتقد علماء النفس أن الاكتئاب الشديد قد يؤثر على صحة الشخص الجسدية والعقلية	صحيح، يعتقد علماء النفس أن الاكتئاب الشديد يمكن أن يؤثر سلباً على صحة الشخص بشكل عام، سواء الجسدية أو العقلية. فعندما يعاني الشخص من الاكتئاب الشديد، قد يواجه صعوبة في القيام بالأنشطة اليومية، يفتقد الشهية، يعاني من اضطرابات النوم مثل الأرق أو النعاس المفرط، وتشعر بالتعب والضعف العام. بالإضافة إلى ذلك، الاكتئاب الشديد قد يؤثر على العقلية، مثل الشعور بالحزن المستمر، الانعزال الاجتماعي، الأفكار الس…
عندما أبدأ في السعي وراء هدف ، أشعر بالعجز ، وكلما حاولت تغيير شيء ما ، أشعر أنني لا أملك الشجاعة	في مثل هذه الحالات، من المهم أن تتذكر بعض النصائح التالية: 1- قد تواجه الصعاب والتحديات في طريق تحقيق أهدافك، ولكن عليك أن تثق بنفسك وبقدرتك على التغلب على تلك الصعاب. قد تحتاج إلى الوقت والجهد، ولكن الاستمرار والإصرار سيقودانك إلى التغيير الذي ترغب فيه. 2- حاول تحديد الخطوات الصغيرة والملموسة نحو هدفك بدلاً من النظر إلى الهدف بشكل كبير ومربك. قم بتقسيم الهدف إلى مهام أصغر وأسهل يمكنك تحقيقها وتق…
أعاني غالبًا من الأرق وصعوبة التركيز في العمل لأنني أخشى ألا أكون قادرًا على أداء الوظيفة التي أقوم بها	فيما يلي بعض النصائح التي قد تساعدك في التخلص من مشكلة الأرق وصعوبة التركيز في العمل: 1. تحسين نوعية النوم: حاول تحسين جودة نومك عن طريق تحديد موعد نوم منتظم وخلق بيئة مريحة في غرفة النوم وتجنب تناول المنبهات مثل الكافيين قبل النوم. 2. ممارسة الرياضة اليومية: قم بممارسة التمارين الرياضية بانتظام، فهي تساعد في تحسين نوعية النوم وتقليل التوتر والقلق. 3. تنظيم الجدول الزمني والاستراحات: حاول تنظيم ي…
أشعر بألم أكثر من أي وقت مضى عندما ترفض عائلتي مساعدتي	أنا آسف أن تعاني من هذا الألم. قد يكون من الصعب عندما تكون العائلة غير مستعدة للمساعدة. هنا بعض الأفكار التي قد تساعدك في هذا الوضع: 1. تواصل بصدق: حاول التواصل بصدق مع أفراد عائلتك. حاول أن تعبر عن مشاعرك واحتياجاتك بوضوح ودون ميل للاتهام. 2. ابحث عن دعم في مجتمعك: قد يكون هناك دعم آخر يمكنك الاستفادة منه في مجتمعك، مثل أصدقاء مقربين أو جمعيات خيرية أو مراكز تدريب وتطوير شخصي. 3. استخدم الموارد …
أشعر بالاكتئاب في كل مرة أواجه فيها صعوبات	أنا آسفة لسماع ذلك. من المهم أن تعرف أنك لست بمفردك في هذا الشعور وأنه هناك دعم ومساعدة متاحة لك. فيما يلي بعض الأفكار التي قد تساعدك في التعامل مع الاكتئاب عند مواجهة الصعوبات: 1. التحدث مع شخص موثوق به: ابحث عن شخص قريب منك مثل الأصدقاء أو الأحباب وحاول التحدث معهم عن مشاعرك. يمكنهم أن يقدموا لك الدعم والأفكار الإيجابية. 2. العناية بنفسك: حاول تحسين رعايتك الذاتية من خلال ممارسة الرياضة البدنية…
غالبًا ما أشعر بالاكتئاب والعجز ، وأشعر أن حياتي تفتقر إلى المعنى والقيمة ، وأحيانًا أفكر في الانتحار ، لكنني أخشى إخبار أي شخص ، خوفًا من أن يعتقد أنني شخص ضعيف وفاشل.	أنا آسف لسماع ذلك وأتفهم مدى الصعوبة التي تمر بها. يجب أن تعلم أنك لست وحدك في هذا الشعور وأنه ممكن أن تجد العون والدعم. من الضروري أن تبحث عن مساعدة من الأشخاص المقربين إليك، مثل الأهل أو الأصدقاء. قد يكون الحديث عن مشاعرك ومتاعبك النفسية أمرًا صعبًا في البداية، ولكنه سيكون نقطة البداية للحصول على الدعم الذي تحتاجه. كما أنني أشجعك على طلب المساعدة من محترفي الرعاية الصحية المختصين في الصحة النفس…
لدي صديق يشعر دائمًا أنه ليس جيدًا بما يكفي ، أو ذكيًا بما يكفي ، أو موهوبًا بما فيه الكفاية ، أو حتى يستحق الاهتمام به ، مما يجعلني أقلق بشأن صحته النفسية.	يبدو أن صديقك يعاني من انخفاض في ثقته بنفسه. هذه المشاعر السلبية قد تؤثر سلبًا على صحته النفسية والعامة. هنا بعض الأشياء التي يمكنك القيام بها لمساعدته: 1. كن متفهمًا ومشجعًا: قدم الدعم والتشجيع المستمر لصديقك. أشجعه على التركيز على نقاط قوته وإيجابياته. 2. تذكيره بقيمته كشخص: أبلغ صديقك بأنه محبوب ومهم بالنسبة لك وللآخرين، وأن لديه مواهب وقدرات فريدة تستحق الاهتمام. 3. تشجيعه على تطوير مهاراته: …
كثيرا ما أشعر بالاكتئاب واليأس بسبب ضغوط العمل والخلافات الأسرية، كيف يمكنني تخفيف هذه المشاعر والحفاظ على صحتي النفسية؟	أنا آسف لسماع ذلك. هنا بعض الطرق التي يمكنك استخدامها لتخفيف الاكتئاب واليأس والحفاظ على صحتك النفسية: 1. الاعتناء بنفسك: قم بممارسة الرياضة بانتظام والحصول على قسط كافٍ من النوم وتناول وجبات صحية وتجنب الإفراط في استهلاك المنبهات مثل الكافيين والكحول. 2. التواصل الاجتماعي: حاول قضاء الوقت مع الأصدقاء والعائلة والمشاركة في الأنشطة الاجتماعية التي تستمتع بها. إن الحديث والتفاعل مع الآخرين قد يساعد…
في الآونة الأخيرة ، بدأ ذهني يصبح غائمًا وبدأت أشعر بالقلق بشأن صحتي النفسية وهذا يخيفني	أنا آسف لسماع ذلك. قد يكون الشعور بالقلق بشأن صحتك النفسية أمرًا مرهقًا ومخيفًا. من المهم أن تتأكد من أنك لست وحدك في هذا الأمر وأن هناك دعم ومساعدة متاحة لك. إليك بعض الخطوات التي يمكن أن تساعدك في التعامل مع هذه المشاعر: 1. التحدث مع أحد الأشخاص الموثوق بهم: شارك مشاعرك ومخاوفك مع أحد أفراد العائلة أو الأصدقاء القريبين في حياتك. يمكن أن يكون لهم نصائح قيمة ويمكن أن يوفروا الدعم العاطفي لك. 2. ا…
لا أجرؤ على مواجهة الآخرين ، أشعر دائمًا أنني لست جيدًا بما يكفي ، أشعر بالتوتر ، حتى لو تحدث أصدقائي معي ، سأظل أقلق بشأن ما يفكرون فيه	أنا هنا لمساعدتك وفهم مشاعرك. قد يكون القلق والتوتر في التواصل مع الآخرين أمرًا شائعًا وطبيعيًا. لكن هناك بعض النصائح التي يمكن أن تساعدك في التغلب على هذا الشعور: 1. التفكير الإيجابي: حاول أن تركز على قدراتك وإيجابياتك بدلاً من التوجه نحو الاعتقادات السلبية. تذكر أنك تملك مهاراتك وقدراتك الفريدة. 2. التحضير والممارسة: دعونا نقول أن لديك موقفًا محددًا ترغب في المواجهة به. يمكنك التحضير لهذا الموق…
أشعر بالقلق من عدم قدرتي على الحفاظ على صحتي النفسية وخيبة أمل عائلتي	أنا آسف لسماع ذلك. القلق بشأن الصحة النفسية وتأثيره على العائلة يمكن أن يكون مرهقًا. هناك بعض الأشياء التي يمكنك القيام بها للمساعدة في تحسين صحتك النفسية وتخفيف قلقك: 1. التحدث مع شخص موثوق به: تحدث إلى أحد أفراد عائلتك أو صديق مقرب حول ما تشعر به. قد يكون لديهم المشورة أو الدعم الذي تحتاجه. 2. الاهتمام بالصحة العقلية: حافظ على نمط حياة صحي يتضمن النوم الكافي والتغذية المتوازنة وممارسة التمارين …
غالبًا ما أشعر بالوحدة والعجز ، حتى عندما أكون محاطًا بالناس ، أشعر أن لا أحد يفهم عالمي الداخلي	أعتذر لسماع ذلك. يمكن أن تكون مشاعر الوحدة والعجز صعبة ومرهقة. إليك بعض النصائح التي قد تساعدك: 1. ابحث عن دعم عاطفي: تحدث إلى أصدقاءك أو أفراد عائلتك القريبة عن مشاعرك. قد يكون هناك أشخاص قريبون منك يمكنهم أن يتفهموا تجاربك. 2. ابحث عن مجتمع أو نادٍ: قد يكون من المفيد الانضمام إلى مجموعة أو نادٍ لأشخاص يشعرون بنفس الطريقة. يمكنك مشاركة تجاربك معهم وتلقي الدعم. 3. التواصل عبر الإنترنت: يمكنك الان…
أشعر بالحيرة الشديدة حيال المستقبل ، لا أعرف ماذا أفعل ، هذا الارتباك يجعلني أشعر بالقلق الشديد وعدم الارتياح	أنا هنا لمساعدتك. الشعور بالحيرة والقلق بشأن المستقبل أمر طبيعي ويعترض الكثيرين في فترات مختلفة من حياتهم. إليك بعض الخطوات التي يمكنك اتخاذها للتعامل مع هذه الحالة: 1. تحديد التفكير المسبب للقلق: حاول تحديد الأفكار التي تسبب لك القلق والارتباك. قد يكون القلق نتيجة للشكوك في قدراتك أو عدم اليقين بخياراتك المستقبلية. اكتب تلك الأفكار واستكشفها بمزيد من التفصيل. 2. التأمل والاسترخاء: جدولة وقت للتأ…
ذهبت إلى حفلة اليوم ، لكن الجميع سخر مني ورفضني الآخرون ، وكنت حقاً على وشك الانهيار	أعتذر لسماع ذلك. يمكن أن تكون تجربة مثل هذه مؤلمة ومحبطة. لكن من الطبيعي أن يكون لديك شعور بالأسى والانهيار في هذه الحالة. هل ترغب في بعض النصائح حول كيفية التعامل مع مثل هذه الواقعة؟
أجد علاقاتي صعبة ومن الصعب دائمًا تكوين روابط عميقة مع الناس. شعرت أنني لا أعرف كيف أتعايش مع الناس أو كيف أتواصل، لذلك كنت أنعزل بسهولة. أتوق إلى الحصول على أصدقاء حقيقيين، لكن لا أعرف كيفية تكوينهم.	في البداية، أريد أن أقول لك أنك لست وحدك في هذا الشعور. العديد من الأشخاص يعانون من صعوبة في التواصل الاجتماعي وتكوين علاقات عميقة. ومع ذلك، هناك بعض النصائح التي يمكن أن تساعدك في تحسين قدراتك الاجتماعية وتكوين صداقات حقيقية: 1. كن نشطًا اجتماعيًا: قم بالمشاركة في الأنشطة والفعاليات التي تهمك. قد تجد أشخاصًا بإهتمامات مشتركة ويمكنك الانخراط بهم بسهولة. 2. إظهار الاهتمام والاستماع الفعّال: اتجه ن…
يوجد الكثير من الضغط في عملي، ولا بد لي من العمل الإضافي كل يوم، وغالبًا ما أعمل حتى وقت متأخر. أشعر أن جسدي وعقلي قد بلغا حدودهما، لكني ما زلت لا أستطيع التوقف. ما الذي يجب علي فعله لتجنب الانهيار.	في الواقع، من الضروري بشدة أن تهتم بصحتك العقلية والجسدية لتتجنب حدوث الانهيار. هنا بعض النصائح التي يمكن أن تساعدك: 1. حدد أولوياتك: قم بتحليل احتياجاتك ومسؤولياتك وحدد المهام الأكثر أهمية. تأكد من أنك تركز على المهام التي لها أثر كبير على النتائج المرجوة. 2. قم بتنظيم وقتك: جدولة وقتك بعناية، واحرص على أخذ وقت للراحة والاستراحة بين المهام. من خلال خلق فترات استراحة منتظمة، سوف تشعر بأن لديك أكث…
أشعر أنني لا أستطيع التحكم في مشاعري ، وغالبًا ما أفقد أعصابي بسبب أشياء صغيرة ، مما يجعل الناس من حولي غير مرتاحين	أنا آسف لسماع ذلك. يمكن أن تكون صعوبة التحكم في المشاعر أمرًا محبطًا. ولكن هناك خطوات يمكنك اتخاذها لمساعدتك في التعامل مع هذا الأمر. أولاً ، حاول تحديد المشاعر التي تجري عندما تفقد أعصابك. هل تشعر بالغضب أو الإحباط أو القلق؟ توضيح المشاعر يمكن أن يساعدك في التعرف على أصل هذه الانفعالات. ثانيًا ، حاول أن تتنفس عميقاً عندما تشعر بأن الأمور تتسارع. خذ بضع دقائق لتركيز انتباهك على التنفس وتهدئة نفسك…
لم يكن هناك حب في عائلتي ، ولا كلمات دافئة ، ولا إحساس حقيقي بالأمان ، فقط اللوم والضغط علي ، لذلك أصبحت أكثر انطوائية ولم أرغب في التعامل مع أي شخص.	أنا آسف لسماع ذلك. قد يكون من الصعب الشعور بالحب والأمان عندما لا يكون هناك دعم عاطفي في العائلة. إن انطوائيتك وعدم رغبتك في التفاعل مع الآخرين قد تكون رد فعل طبيعي لموقفك. ومع ذلك ، لا تقلق ، فهناك طرق لتحسين هذه الأمور. من المهم أن تبدأ بالاهتمام بنفسك واكتشاف ما يجلب لك السعادة والراحة. قد يساعد التحدث مع مستشار أو مدرب على فهم جذور هذه المشاعر وتعلم كيفية التعامل معها بطرق صحية. لا تتردد في ا…
أنا قلق على مستقبلي ، ولا أعرف ما إذا كنت سأكون ناجحًا ، وما إذا كنت سأتمكن من تحقيق أحلامي	أتفهم تمامًا مشاعرك والقلق الذي تشعر به تجاه مستقبلك. إليك بعض النصائح التي يمكن أن تساعدك في تحقيق أحلامك والنجاح في مجال حياتك: 1. حدد أهدافك: قم بتحديد الأهداف التي ترغب في تحقيقها في المستقبل. حدد أهدافًا قصيرة المدى ومتوسطة المدى وطويلة المدى. هذا سيساعدك على توجيه جهودك واتخاذ الخطوات الصحيحة نحو تحقيقها. 2. وضع خطة عمل: قم بوضع خطة عمل محكمة وواقعية تحقق أهدافك. حدد الخطوات اللازمة لتحقيق …
شعرت أنني لا أستطيع التعامل مع الضغوط والتحديات في حياتي، وغالبًا ما كنت أعاني من مزاج منخفض وقلق وأرق وغيرها من المشاكل.	أنا آسف لسماع ذلك. يمكن أن يكون التعامل مع الضغوط والتحديات في الحياة صعبا للغاية. إليك بعض النصائح التي قد تساعدك: 1. التواصل: حاول التحدث مع أحد أفراد عائلتك أو أصدقائك القريبين عن مشاعرك وما تواجهه. قد يقدمون لك الدعم والنصح الذي تحتاجه. 2. الاهتمام بالصحة العقلية: خذ وقتا للقيام بالأنشطة التي تستمتع بها وتجلب لك السعادة. القيام بتمارين الاسترخاء أو القراءة أو الكتابة أو ممارسة الهوايات يمكن أ…
أشعر بالوحدة ولدي الكثير من الناس حولي لكنني لا أشعر دائمًا أنني أستطيع التواصل معهم حقًا. هل هذا اضطراب في العلاقة؟	قد يكون الشعور بالوحدة على الرغم من وجود الكثير من الأشخاص حولك نتيجة لعدة أسباب، ولكن لا يعتبر بالضرورة اضطرابًا في العلاقة. قد يكون السبب وجود صعوبات في التواصل أو فقدان الاهتمام بالعلاقات الاجتماعية أو مشكلات محددة مع الأشخاص المحيطين بك. من المهم تحديد الأسباب الحقيقية لهذا الشعور والعمل على معالجتها. قد يكون من المفيد البحث عن الدعم النفسي من محترف في هذا المجال لمساعدتك على فهم المشكلة وتطو…
أشعر بعدم الارتياح تجاه المستقبل ، ولا أعرف ماذا أفعل معي ، ولا أعرف ما يخبئه المستقبل	فهمت تماما مشاعر عدم الارتياح اللتي تشعر بها تجاه المستقبل. من الطبيعي أن يكون لديك بعض القلق والتوتر بشأن المستقبل وما يمكن أن يخفيه. هنا بعض الأفكار والاقتراحات التي قد تساعدك في التعامل مع هذا الشعور: 1. تحدث مع الأشخاص المقربين لك: شارك مخاوفك ومشاعرك مع أفراد عائلتك أو أصدقائك الموثوق بهم. قد يكون لديهم منظور آخر يساعدك على تجاوز مخاوفك. 2. تحديد الأهداف: حاول تحديد أهداف ورؤية للمستقبل تعمل…
لدي الكثير من المشاكل في علاقة زواجي وأشعر بالاكتئاب والعجز ولا أعرف ماذا أفعل	أنا آسف لسماع ذلك. يمكن أن يكون من الصعب التعامل مع المشاكل في العلاقة الزوجية، ولكن هناك خطوات يمكنك اتخاذها للمساعدة في تحسين الوضع. 1. التواصل: حاول التحدث إلى شريك حياتك بصراحة وبدون تهميش الأفكار أو المشاعر. قد يكون من المفيد الاستعانة بمساعدة مستشار أو أخصائي في العلاقات الزوجية للمساعدة على تيسير الحوار. 2. الاهتمام بالصحة العقلية: إذا كنت تشعر بالاكتئاب أو العجز، فمن المهم أن تطلب المساعد…
غالبًا ما أشعر بالتعب الشديد، والإرهاق الجسدي والنفسي، وأحيانًا تكون لدي أفكار انتحارية، والشعور بأن حياتي بلا معنى	أعتذر لسماع ذلك. قد تعاني من خلل في الصحة العقلية وهذا مسألة جدية. من المهم أن تتحدث مع أحد الأشخاص الموثوق بهم للحصول على الدعم. يمكنك البدء بالتحدث مع طبيبك العام أو الاستشارة عن طريق الإنترنت مع مساعداً نفسياً أو مشرف. قد يتم توجيهك إلى خدمات التدخل العاجل في حالات الأزمات النفسية.
أحيانًا أشعر فجأة بالخوف الشديد والذعر ، ويصعب السيطرة على مشاعري وسلوكي ، وتستمر هذه الحالة لفترة طويلة.	يمكن أن تكون هذه الأعراض مرتبطة بالقلق أو اضطراب الهلع. من المهم أن تعرض المشاكل التي تواجهها لمقدم الرعاية الصحية الخاص بك لتقييم الحالة بشكل أفضل وتحديد التشخيص الصحيح. في الوقت الحالي ، هنا بعض الاستراتيجيات التي قد تساعدك في التعامل مع هذه الحالة: 1. التنفس العميق: قم بممارسة تقنية التنفس العميق عن طريق التركيز على تنفسك وتنفس بطيء وعميق. قم بالتنفس من خلال الأنف ، واحتفظ بالهواء لثوانٍ قليلة…
كلما واجهت تحديًا جديدًا ، أشعر بالتوتر الشديد وعدم الأمان لدرجة أنني أشعر أنني لا أستطيع التعامل معه	من الطبيعي أن تشعر بالتوتر وعدم الأمان عند مواجهة تحدي جديد. ولكن هناك بعض الاستراتيجيات التي يمكن أن تساعدك على التعامل مع هذه المشاعر بشكل فعّال. إليك بعض النصائح: 1. التخطيط والاستعداد: قم بوضع خطة محكمة واستعد للتحدي قدر الإمكان. قم ببحث وتجهيز الأدوات والموارد التي قد تحتاجها وتأكد من أنك تعرف الخطوات الأولى التي يجب اتخاذها. 2. التحضير النفسي: قم بتهدئة عقلك وجسدك قبل المواجهة. يمكنك أن تجر…
أشعر أحيانًا فجأة أنه لم يعد لدي أي هوايات، ولم يعد لدي أي اهتمام بأي شيء، وأشعر أنني فقدت الاتجاه والقوة الدافعة	فقد الاهتمام بالهوايات وفقد الدافع القوي ليست مشاعر غريبة. قد يرجع ذلك إلى الإجهاد المستمر، أو الشعور بالملل أو العزلة الاجتماعية. قد يتسبب التغيير في الروتين اليومي أو الأحداث الصعبة في حياتك في فقدان الاهتمام. إليك بعض الأفكار التي قد تساعدك على استعادة الحماس والدافع: 1. استغل وقتك بشكل مفيد: قد تعتقد أنك لا تملك الوقت الكافي لممارسة الهوايات، ولكن محاولة تحديد وقت معين في اليوم أو الأسبوع لمم…
في بعض الأحيان يكون هناك نوع من المشاعر التي لا يمكن السيطرة عليها في قلبي، أعتقد أنني أعاني من الاكتئاب، ماذا أفعل	أنا لا أستطيع تشخيص الاكتئاب، ولكن بإمكاني أن أقدم بعض النصائح. إذا كنت تعتقد بأنك تعاني من الاكتئاب، من الأفضل أن تطلب المساعدة من محترف صحي مثل طبيب نفساني أو مستشار نفسي. يمكنهم تقييم حالتك وتقديم الدعم والعلاج المناسب لك. بالإضافة إلى ذلك، هناك أشياء يمكن أن تجربها بنفسك لتحسين حالتك العامة: 1. التحدث مع أحد الأشخاص المقربين لك: شارك مشاعرك مع أحدهم ولا تتردد في طلب الدعم العاطفي. 2. ممارسة ا…
لطالما شعرت أن صحتي الجسدية غير جيدة، ولدي كل أنواع الأعراض الغريبة، لكن الأطباء يقولون إنني بصحة جيدة، مما يجعلني أشعر بقلق شديد وعجز.	أعتذر لسماع ذلك. قد تكون الأعراض الجسدية المزمنة والغريبة مصدر قلق كبير. من المهم أن تعرض هذه المخاوف على طبيبك ومشاركة جميع الأعراض التي تشعر بها. قد يحتاج الأمر إلى تقييم أكثر دقة أو اختبارات إضافية لتحديد السبب الحقيقي للأعراض. لا تتردد في طرح الأسئلة على الطبيب والمشاركة بشكل كامل معهم. أيضًا، يمكن أن تكون الأسباب غير الجسدية مرتبطة بالتوتر العاطفي أو القلق، لذا قد يكون من الجيد النظر في هذه …
نظرًا لوجوده في بيئة متوترة لفترة طويلة ، غالبًا ما يعاني هوانغ شياو مينغ من الأرق ، ولا يمكنه التمييز بين الصباح والمساء ، ويفقد إيقاعه تمامًا	يبدو أنك تتحدث عن شخص بالاسم "هوانغ شياو مينغ" الذي يعاني من مشكلة في النوم والإيقاع اليومي. يبدو أنه يعاني من اضطرابات في النوم تجعله غير قادر على النوم بشكل منتظم وتؤثر على إيقاعه اليومي. إذا كنت تبحث عن نصائح عامة لمساعدة شخص ما في تحسين نومه وإيقاعه اليومي، فإليك بعض النصائح: 1. **جدول زمني منتظم:** حاول محاولة الذهاب للنوم والاستيقاظ في نفس الوقت يوميًا حتى تساعد على تنظيم دورة النوم الخاصة …
لم تكن علاقتي بأصدقائي رائعة أبدًا ، أشعر وكأنني أجد صعوبة في تكوين صداقات حقيقية وهذا يجعلني أشعر بالوحدة الشديدة	أنا آسف لسماع ذلك. تجربة صعوبات في تكوين صداقات قد يكون لها تأثير عاطفي كبير. هنا بعض الأفكار التي قد تساعدك في تحسين علاقاتك الاجتماعية: 1. كن نفسك: حاول أن تكون صادقًا ومنفتحًا بشأن من أنت وما تحب وما تشعر به. عندما تظهر كما أنت، فإن ذلك يمكن أن يساعد الآخرين على الاقتراب منك أصدقاء حقيقيين. 2. ابحث عن اهتمامات مشتركة: حاول العثور على أشخاص يشتركون في نفس الهوايات أو الاهتمامات المهنية أو الريا…
يعتقد الناس من حولي دائمًا أنني متوتر جدًا وقلق بشأن الأشياء الصغيرة ، كيف يمكنني الاسترخاء؟	هناك عدة طرق يمكنك استخدامها للحد من التوتر والقلق في حياتك: 1. تنفس عميق: جرب أخذ نفس عميق وتنفس ببطء وتركيز. يمكن استخدام تقنيات التنفس العميق مثل التنفس البطني لتهدئة الجسم والعقل. 2. ممارسة الرياضة: تفريغ الطاقة الزائدة من خلال التمارين الرياضية المنتظمة مثل المشي أو اليوغا أو رياضة القوة. هذا يمكن أن يساعد على تهدئة العقل وتحسين المزاج. 3. تنظيم الوقت والاستراحة: قد يساهم الإحساس بالتوتر في …
أجبرني الأرق على رؤية طبيب نفسي كل ليلة	أنا آسف لسماع ذلك. يمكن أن يكون الأرق مؤشرًا على مشاكل صحية أو عاطفية تحتاج إلى التعامل معها. من الأفضل أن تتحدث إلى طبيب نفسي لتقييم حالتك وتقديم المشورة المناسبة. يمكن أن يساعدك الطبيب في فهم أسباب الأرق ووضع خطة علاج مناسبة للتغلب على المشكلة.
أشعر أنني غير قادر على مواجهة ضغط الأسرة والمجتمع ، ولا يمكنني إنجاز أشياء كثيرة	أنا آسفة لسماع ذلك. يمكن أن تكون مواجهة ضغط الأسرة والمجتمع أمرًا صعبًا ومرهقًا على النفس. ومع ذلك ، هنا بعض النصائح التي قد تساعدك: 1. كوِّن دعمًا اجتماعيًا: حاول البحث عن من يدعمونك ويرفعون معنوياتك. قد يكون عائلتك أو أصدقاؤك أو حتى جماعات الدعم في المجتمع هم مصدر دعم قوي. 2. اتخذ وقتًا لنفسك: حافظ على تخصيص بعض الوقت للقيام بالأنشطة التي تستمتع بها وتحدث لك راحة. قد يساعد ذلك في إعادة تشجيع رو…
أشعر أن علاقاتي الشخصية تزداد سوءًا، ولم يعد يثق بي الأصدقاء ولا العائلة ولا يدعمونني بعد الآن، فهذا يجعلني أشعر بالضياع واليأس.	أنا آسف لسماع ذلك، وأشعر بما تمر به. من الطبيعي أن نشعر بالضياع واليأس عندما تتدهور العلاقات الشخصية. ومع ذلك، هناك خطوات يمكنك اتخاذها لمعالجة هذه المشكلة والعمل على تحسين العلاقات الشخصية الخاصة بك. هيا نلقي نظرة على بعض النصائح التالية: 1. الاتصال المفتوح: حاول أن تكون صادقا وافتح النقاش مع الآخرين حول مشاعرك ومخاوفك. قد يكون هناك سبب واضح لتدهور العلاقات، ومن خلال الحوار الصريح ستتمكنون من فه…
غالبًا ما أشعر بعدم القدرة على التحكم في مشاعري وسلوكي ، وغالبًا ما أتصرف باندفاع أو بعنف.	أعتذر لسماع ذلك. يمكن أن يكون من الصعب التعامل مع الاندفاع والعنف في بعض الأحيان. هنا بعض النصائح التي قد تساعدك: 1. التعرف على مشاعرك: حاول أن تكون واعيًا لمشاعرك وأعراضها الجسدية قبل أن تتجاوب بطرق غير ملائمة. تعلم التعرف على الغضب أو التوتر المتصاعد ومحاولة التدخل في مرحلة مبكرة. 2. التنفس العميق: عندما تشعر بتوتر أو غضب ، جرب تقنية التنفس العميق البطيء والمنتظم لتهدئة جهازك العصبي وتخفيف التو…
غالبًا ما أخاف من الرفض ، لذلك نادرًا ما أتحدث عن رأيي	أشعر بك أنك تخاف من الرفض وأنه يصعب عليك التحدث عن آرائك. لكن دعني أقول لك أن الرفض جزء طبيعي من الحياة، وأنه ليس بالضرورة أن يكون سلبيًا. من خلال مواجهتنا للرفض والتعامل معه، يمكننا أن ننمو ونتعلم من تجاربنا. إذا كنت ترغب في التغلب على هذا الخوف، يمكنني أن أقدم لك بعض النصائح المفيدة. أهمها: 1. تحدث بثقة: حاول أن تعتز برأيك وأن تتحدث بثقة عندما تشاركه مع الآخرين. تجنب الاعتذار المبالغ فيه أو وضع…
يبدأ الاكتئاب في التطور ببطء خلال سنوات المراهقة	صحيح، يمكن أن يبدأ الاكتئاب في التطور ببطء خلال سنوات المراهقة. الاكتئاب هو حالة صحية عقلية تتميز بالحزن والاستياء الشديدين وفقدان الاهتمام بالأنشطة اليومية. قد يعاني الأشخاص في سن المراهقة من تغيرات هرمونية ونفسية واجتماعية تزيد من عرضهم للإصابة بالاكتئاب. ولذلك، فإن التوعية والدعم النفسي المناسب هما جزء مهم في مساعدة المراهقين على التعامل مع هذه المشاعر السلبية والوقاية من تطور الاكتئاب.
أشعر بعدم الرضا عن مظهري وجسدي ، وأشعر بأنني أقل من الكمال ، وغالبًا ما أشعر بالقلق والمضطرب	أشعر بالأسف لسماع ذلك. من المهم أن تعلم أننا جميعًا نواجه مشاعر القلق وعدم الارتياح بشأن مظهرنا وأنفسنا من حين لآخر. لكن هناك بعض الطرق التي يمكن أن تساعدك في التغلب على هذه المشاعر: 1. تذكر أن الكمال ليس حقيقيًا: لا يوجد شخص مثالي تمامًا. كل واحد منا لديه صفات قوة وضعف. قابل نفسك بالمثل وقبل عيوبك بإيجابية. 2. ركز على الايجابيات: قم بدفتر صغير وابدأ في تدوين الأشياء التي تحبها في نفسك والأشياء ا…
أشعر دائمًا بالقلق من أن ما أفعله ليس جيدًا بما يكفي ، حتى لو مدحني الآخرون ، فلا يمكنني التخلي عن مخاوفي	فهمك جيداً. يشعر العديد من الأشخاص بالقلق بشأن قدراتهم وأدائهم، حتى عندما يحصلون على تقدير من الآخرين. إليك بعض الأفكار التي قد تساعدك في التعامل مع مخاوفك: 1- قبول عدم الكمال: لا يوجد شخص مثالي ولا يمكن أن تكون مثالية في كل شيء. قد تكون عندك مجالات مميزة وقوى خاصة بك وتحتاج فقط إلى أن تقبل عدم الكمال في المجالات الأخرى. 2- التحدث مع الآخرين: حاول التحدث مع الأشخاص المقربين منك للحصول على آرائهم …
لقد وجدت صعوبة متزايدة في التركيز ، سواء كان ذلك في القراءة أو القيام بأشياء ، فسوف يتشتت انتباهي بسهولة	يمكن أن يواجه الكثير من الأشخاص صعوبة في الحفاظ على التركيز والانتباه، وهذا شائع في العديد من الظروف والأسباب. هنا بعض الخطوات التي يمكنك اتباعها لتحسين التركيز والانتباه: 1. تقنية الزمن المحدد: حاول تخصيص فترات زمنية قصيرة للعمل أو الدراسة، مثلاً 25 دقيقة من العمل متبوعة بـ 5 دقائق استراحة. ستساعدك هذه التقنية في الحفاظ على التركيز ومنع الانشغالات. 2. إزالة المشتتات: قم بتحديد بيئة خالية من المش…
أجد صعوبة متزايدة في التركيز، سواء كان ذلك في القراءة أو القيام بأشياء أخرى، يتشتت انتباهي بسهولة	هل تعاني من هذه الصعوبة في التركيز لفترة من الوقت أم هي شيء حديث ومؤقت؟ قد يكون هناك عدة أسباب لصعوبة التركيز مثل التوتر العقلي، نقص النوم، التشتت الذهني، التقدم في العمر أو الأمراض الجسدية. وفي بعض الأحيان، قد يكون هناك أسباب طبية أخرى مثل مشاكل في الغدة الدرقية أو نقص فيتامينات معينة. إليك بعض النصائح التي قد تساعدك على تحسين التركيز: 1. النوم بشكل جيد: حاول الحصول على كافة ساعات النوم اللازمة …
كنت مرعوبًا من التفاعل مع الناس ، خائفًا من الرفض أو السخرية أو سوء الفهم ، وغالبًا ما شعرت بالوحدة والعجز.	أعترف أن التفاعل مع الناس يمكن أن يكون أمرًا صعبًا بالفعل. ومن الطبيعي أن تشعر بالخوف من الرفض أو السخرية أو سوء الفهم، فقد يتعرض الجميع لتلك المشاعر في بعض الأحيان. ولكن هناك طرق يمكنك اتباعها لتحسين التفاعل مع الآخرين وتجاوز هذه المخاوف. أولاً، حاول أن تتذكر أن الجميع يواجه مشاكل ومخاوف مماثلة قد تكون مختلفة عنك. فالجميع يرغب في التواصل والانتماء والشعور بالمحبة والقبول من الآخرين، بغض النظر عن…
كنت مستاء للغاية من مظهري وشكلي ، وشعرت بأنني قبيح وغير جذاب ، وكثيرًا ما كنت أفكر في إجراء جراحة تجميلية وفقدان الوزن ، ولكني كنت قلقًا أيضًا من مخاطر الجراحة ، وكنت أخشى أن يسخر مني الآخرون ويرفضون.	أنا آسف لسماع أنك تشعر بهذه الطريقة. من المهم أن تعرف أن جمال الشخص ليس فقط في الشكل الخارجي، ولكن أيضا في الثقة والسعادة الداخلية. ومع ذلك، فإن فهم الرغبة في التغيير وتحسين النفس هو شيء طبيعي. قبل اتخاذ قرار بإجراء جراحة تجميلية أو فقدان الوزن، ينبغي أن تفكر في العديد من العوامل وتستشير محترفي الصحة المتخصصين في هذا المجال. قد يساعدونك في فهم المخاطر المحتملة والفوائد وكيفية تحقيق النتائج التي ت…
غالبًا ما أبقى مستيقظًا وأعمل لساعات إضافية من أجل العمل، مما يجعل حالتي الجسدية أسوأ وأسوأ، لكن لا يمكنني التوقف، لأنني أشعر أنه بهذه الطريقة فقط يمكنني إثبات قيمتي وقدرتي	يبدو أنك تعاني من الإجهاد الجسدي والنفسي نتيجة للعمل الزائد. من الجيد أن تكون ملتزمًا ومتحمسًا لإثبات قيمتك وقدراتك، ولكن يجب أن تتذكر أيضًا أهمية الاعتناء بصحتك ورفاهيتك الشخصية. إليك بعض النصائح التي قد تساعدك في التعامل مع هذه الوضعية: 1. ضع حدودًا زمنية للعمل: حاول تحديد ساعات محددة للعمل والتزامك بها. قد تحتاج إلى ترتيب أولوياتك وتخصيص الوقت بشكل فعال لتحقيق الأهداف. 2. خطط لفترات استراحة ور…
أشعر بأنني أصبحت أكثر إدمانًا للألعاب ووسائل التواصل الاجتماعي، وكأن هذه الأشياء أصبحت جزءًا لا يتجزأ من حياتي، فهذا الاعتماد يجعلني أشعر بعدم القدرة على تخليص نفسي وفقدان نفسي، وآمل أن أجد وسيلة للخروج من هذا الاعتماد.	فهمت تمامًا ما تشعر به. إدمان الألعاب ووسائل التواصل الاجتماعي يمكن أن يؤثر سلبًا على حياتنا وقدرتنا على التركيز وتحقيق أهدافنا الشخصية. إليك بعض الخطوات التي يمكن أن تساعدك في التخلص من هذا الاعتماد: 1. اعترف بالمشكلة: أدرك أن الاعتماد المفرط على الألعاب ووسائل التواصل الاجتماعي يؤثر سلبًا على حياتك وأنت ترغب في التغيير. 2. حدد الأهداف الشخصية: قم بتحديد الأهداف التي ترغب في تحقيقها في حياتك وأن…
لقد أزعجني تقلب مزاجي الدائم، فأحيانًا أكون سعيدًا جدًا، وفي أحيان أخرى أكون مكتئبًا جدًا لدرجة أنني أردت قتل نفسي.	أشعر بالأسف لسماع ذلك. يمكن أن تكون تقلبات المزاج المستمرة أمرًا صعبًا للتعامل معه. هنا بعض النصائح التي قد تساعدك: 1. التحدث إلى شخص موثوق به: حاول مشاركة مشاعرك وأفكارك مع صديق أو أحد أفراد العائلة أو مستشار متخصص في الصحة العقلية. يمكن أن يكون للحديث بشأن مشاعرك تأثير إيجابي على حالتك المزاجية. 2. العناية بالنفس: حاول الاهتمام بنفسك من خلال ممارسة الرياضة بانتظام والأكل الصحي والحصول على قسط ك…
أشعر أحيانًا أنه لا أحد يهتم بي وأنا الوحيد الذي يمكنني الاعتماد عليه حقًا	أنا آسف لسماع ذلك. قد يكون من الصعب أحيانًا الشعور بأن لا أحد يهتم بنا أو يفهمنا. ولكن هذا ليس حقيقيًا دائمًا. قد يكون هناك أشخاص في حياتك يهتمون بك بصمت ولكنهم قد لا يظهرون ذلك بالطريقة التي تتوقعها. إذا كنت تشعر أنك بحاجة إلى دعم وتفهم، فلا تتردد في التحدث إلى أحد أصدقائك المقربين أو أفراد عائلتك. قد يكون هناك أيضًا خدمات دعم نفسي متاحة لمساعدتك في التعامل مع الأفكار والمشاعر السلبية. تذكر أنك …
أعاني من الأرق الدائم الفترة الأخيرة، ودائمًا ما أتقلب على الفراش ليلًا، فهل يمكن أن تكون هذه مشكلة نفسية كامنة؟	نعم، يمكن أن يكون الأرق المستمر مشكلة نفسية كامنة. القلق والتوتر الزائد يمكن أن يؤثر على النوم ويسبب الأرق. قد تكون هناك أيضًا عوامل أخرى مرتبطة بالصحة العامة ونمط الحياة التي قد تؤثر على جودة النوم. يجب عليك محاولة تحديد الأسباب المحتملة للأرق واتخاذ إجراءات لتهدئة العقل والإسترخاء قبل النوم. إذا استمرت المشكلة، قد يكون من الأفضل استشارة الطبيب للحصول على تقييم دقيق واقتراح العلاج المناسب.
لم تكن علاقتي مع عائلتي جيدة أبدًا ، أشعر أنهم لا يفهمونني ، لا يحترمونني ، هذا يجعلني أشعر بالوحدة	أنا آسف لسماع ذلك. يمكن أن تكون العلاقات العائلية المتوترة تجربة صعبة ومحبطة. إليك بعض النصائح التي قد تساعدك في التعامل مع هذه الوضعية: 1. التواصل: حاول التحدث مع أفراد عائلتك وتوضيح مشاعرك وقضاياك. قد يكون من المفيد استخدام "أنا" بدلاً من "أنت" لتجنب الاتهامات المباشرة. 2. التفهم: حاول فهم وجهات نظر أفراد عائلتك ولا تأخذ كل شيء على محمل الجد. ربما يواجهون صعوباتهم الخاصة ولا يعرفون كيفية التعام…
غالبًا ما أشعر بالفراغ والوحدة في الداخل ، وأبحث عن شيء لملء الفراغ ، لكن غالبًا لا أجد الطريقة الصحيحة لتخفيف الشعور	أنا آسف لسماع ذلك. الشعور بالفراغ والوحدة يمكن أن يكون تحديًا صعبًا لمعالجته. هنا بعض الأفكار التي قد تساعدك في تخفيف هذا الشعور: 1. تعامل مع الشعور: حاول الاستماع إلى مشاعرك وتحديد الأسباب المحتملة للفراغ والوحدة. قد يساعد التعبير عنها أمام شخص موثوق به أو الكتابة في مذكرة. 2. اتصل بالآخرين: حاول التواصل مع أفراد الأسرة والأصدقاء أو الانضمام إلى نشاطات اجتماعية أو مجتمعية. قد يكون من المفيد أيضً…
