# Supplementary material
Source: ML conference proceedings conference paper supplement (https://openreview.net/forum?id=JL42j1BL5h)
Supplement: supplementary_material [file Mental_Health_pa.xlsx]

## Sheet: Sheet1
Input	Output
Je me sens souvent seul et impuissant, personne ne peut me comprendre, je me sens même comme un perdant, sans valeur ni sens, ce sentiment me rend très déprimé et désespéré, je ne sais pas comment m'en débarrasser.	Je comprends que vous vous sentiez seul et impuissant. C'est un sentiment très difficile à vivre, et je suis désolé que vous le traversiez. Il est important de savoir que vous n'êtes pas seul dans ce cas. Beaucoup de gens se sentent seuls et impuissants à un moment ou à un autre de leur vie. Il y a des choses que vous pouvez faire pour vous sentir mieux. Vous pouvez parler à un ami ou à un membre…
Même si je vais juste acheter un sac de chips, j'ai peur que les gens pensent que j'ai un comportement autodestructeur et que je mange trop	Il est important de se rappeler que tout le monde a des pensées et des sentiments négatifs de temps en temps. Ce qui compte, c'est la façon dont nous gérons ces pensées et ces sentiments. Si vous vous surprenez à avoir des pensées négatives sur vous-même ou sur votre comportement, essayez de les remettre en question. Sont-elles vraiment vraies ? Y a-t-il une autre façon de voir les choses ? Il pe…
Je me sentais toujours fatiguée et impuissante, incapable de me concentrer sur mes tâches ou même de travailler sur les choses qui m'intéressaient, ce qui me rendait très frustrée.	Il est important de prendre soin de soi et de s'accorder du temps pour se reposer et se détendre. Il est également important de trouver des activités qui vous plaisent et qui vous permettent de vous exprimer. Si vous vous sentez toujours fatiguée et impuissante, il peut être utile de consulter un médecin ou un thérapeute pour obtenir de l'aide.
Récemment, je n'arrive pas à bien dormir, ou je fais des cauchemars quand je m'endors, et je me sens très fatigué et épuisé quand je me réveille.	Il y a plusieurs raisons possibles pour lesquelles vous pourriez avoir des difficultés à dormir ou faire des cauchemars. Voici quelques conseils pour vous aider à mieux dormir : * Établissez une routine de sommeil régulière et respectez-la autant que possible, même le week-end. * Créez un environnement de sommeil confortable et relaxant. Assurez-vous que votre chambre soit sombre, calme et fraîch…
Chaque fois que je vais chez le médecin, il n'y a aucune amélioration, et en plus, mon état d'esprit empire. Je tombe souvent dans un état malsain d'auto-pitié et d'autodépréciation.	Il est important de se rappeler que la guérison n'est pas un processus linéaire. Il y aura des hauts et des bas en cours de route. Il est important de rester positif et de se concentrer sur les progrès que vous avez réalisés, même s'ils sont minimes. Il est également important de se rappeler que vous n'êtes pas seul. Beaucoup de gens souffrent de problèmes de santé mentale et il existe de nombreu…
Je me suis toujours senti isolé et exclu, même dans la foule.	Vous n'êtes pas seul. Beaucoup de gens se sentent isolés et exclus, même dans la foule. Il y a de nombreuses raisons pour lesquelles cela peut arriver, mais il est important de savoir que vous n'êtes pas seul. Il existe des moyens de surmonter ce sentiment d'isolement et de se sentir plus connecté aux autres.
S'immerger dans les jeux ou internet est une forme invisible de pression psychologique.	L'immersion dans les jeux ou Internet peut être une forme invisible de pression psychologique. Lorsque les gens sont immergés dans ces activités, ils peuvent perdre la notion du temps et de l'espace, et peuvent se sentir isolés du monde réel. Cela peut entraîner des problèmes de santé mentale, tels que la dépression et l'anxiété.
J'ai subi trop de pression récemment, je me sens très anxieux tous les jours, je ne dors pas bien, j'ai mal à la tête, mon cœur bat vite et j'ai l'impression que je vais m'effondrer à tout moment	Il est important de prendre soin de soi et de sa santé mentale. Si vous vous sentez anxieux, déprimé ou si vous avez des pensées suicidaires, il est important de demander de l'aide. Il existe de nombreuses ressources disponibles pour vous aider à traverser cette période difficile. Vous pouvez parler à un ami ou à un membre de votre famille, ou vous pouvez contacter un professionnel de la santé me…
Chaque fois que je rencontre des difficultés et des revers, je perds toujours ma confiance et ma motivation et je sens que je ne peux pas gérer mes problèmes	Il est normal de se sentir découragé lorsque l'on rencontre des difficultés et des revers. Cependant, il est important de se rappeler que ces sentiments sont temporaires et que vous pouvez les surmonter. Voici quelques conseils pour vous aider à retrouver votre confiance et votre motivation lorsque vous vous sentez dépassé : * Prenez du recul et évaluez la situation. Il peut être utile de prendre…
J'ai toujours peur de ne pas faire assez bien, et j'ai l'impression d'être constamment jugé par d'autres personnes, et c'est déprimant.	Il est normal d'avoir peur de ne pas faire assez bien, et de se sentir jugé par les autres. Ces sentiments sont souvent liés à la perfectionnisme, qui est le désir d'être parfait dans tout ce que l'on fait. Le perfectionnisme peut être une qualité positive, car il peut nous pousser à nous dépasser et à atteindre nos objectifs. Cependant, il peut aussi devenir un problème lorsqu'il nous empêche de…
J'étais toujours inquiet de savoir si je faisais tout correctement, et j'avais peur de ce que les autres penseraient ou me critiqueraient, et j'étais souvent plongé dans un douloureux doute de moi-même en conséquence.	Il est normal de s'inquiéter de faire les choses correctement et de ce que les autres pensent de nous. Cependant, il est important de ne pas laisser ces inquiétudes nous empêcher de vivre notre vie. Nous devons apprendre à nous accepter tels que nous sommes, avec nos défauts et nos qualités. Nous devons également apprendre à faire confiance à notre propre jugement et à ne pas nous laisser influen…
Je garde mes pensées dans mon cœur, je sens toujours que je vais exploser, et je ne peux pas me cacher du regard des autres	Vous n'êtes pas seul. Beaucoup de gens se sentent comme vous. Il est important de savoir que vous n'êtes pas seul et qu'il y a des gens qui peuvent vous aider. Si vous vous sentez dépassé, n'hésitez pas à demander de l'aide. Il existe de nombreuses ressources disponibles pour vous aider à traverser cette période difficile.
Ma famille a subi un accident soudain, mes deux parents ont été gravement blessés, ce qui m'a fait me sentir impuissant et déprimé, et j'ai même développé des symptômes de dépression.	Je comprends que vous ayez vécu une période très difficile. Il est normal de se sentir impuissant et déprimé après un tel événement. Il est important de prendre soin de soi et de demander de l'aide si nécessaire. Il existe de nombreuses ressources disponibles pour vous aider à traverser cette période difficile.
Je me suis trouvé de moins en moins actif socialement, préférant toujours être seul, ne souhaitant pas socialiser ou partager ma vie avec les autres, cette solitude m'a fait me sentir très déprimé	Il est important de trouver un équilibre entre le temps passé seul et le temps passé avec les autres. Il est normal de vouloir être seul de temps en temps, mais il est également important de maintenir des relations sociales. Si vous vous sentez déprimé, il peut être utile de parler à un ami ou à un membre de votre famille de ce que vous ressentez. Il existe également des ressources professionnell…
J'ai un fort désir de contrôle et je veux toujours tout contrôler de mes mains, et ne pas permettre aux autres de s'impliquer ou d'intervenir, ce qui conduit à la rupture de mes relations interpersonnelles.	Il semble que vous ayez du mal à lâcher prise et à faire confiance aux autres. Cela peut être une source de stress et d'anxiété, et peut nuire à vos relations interpersonnelles. Il existe des moyens de surmonter ce problème, comme la thérapie ou le coaching.
J'ai souvent l'impression que mon esprit est très chaotique, comme s'il y avait trop de pensées et de voix dans ma tête en même temps, ce qui me rend très confus et perdu	Il est normal de se sentir dépassé par ses pensées et ses émotions de temps en temps. Cependant, si vous vous sentez constamment confus et perdu, il peut être utile de demander l'aide d'un professionnel de la santé mentale. Un thérapeute peut vous aider à identifier les causes de votre confusion et à développer des stratégies pour gérer vos pensées et vos émotions de manière plus efficace.
Pourquoi je suis critiqué par ma famille pour tout ce que je fais	Il y a plusieurs raisons possibles pour lesquelles vous êtes critiqué par votre famille pour tout ce que vous faites. Voici quelques possibilités : * **Vous êtes trop sensible.** Il est possible que vous soyez trop sensible aux critiques et que vous interprétiez les commentaires de votre famille comme des critiques, même si ce n'est pas leur intention. * **Votre famille a des attentes élevées.** …
Récemment, je me sens toujours épuisé, chaque jour, je manque d'énergie, même après avoir beaucoup dormi, cela ne s'améliore pas.	Il y a plusieurs raisons possibles pour lesquelles vous pourriez vous sentir épuisé tout le temps. Voici quelques possibilités : * Vous ne dormez peut-être pas suffisamment. La plupart des adultes ont besoin de 7 à 8 heures de sommeil par nuit. Si vous ne dormez pas suffisamment, vous risquez de vous sentir fatigué et épuisé pendant la journée. * Vous ne mangez peut-être pas suffisamment d'alimen…
J'ai l'impression d'avoir perdu toute motivation et espoir et la vie n'a plus de sens	Je comprends que vous vous sentez démotivé et désespéré. C'est un sentiment très difficile à vivre, et je veux vous assurer que vous n'êtes pas seul. Il y a beaucoup de gens qui se sentent comme vous, et il y a de l'aide disponible. Si vous vous sentez suicidaire, veuillez appeler le 15 ou vous rendre à l'hôpital le plus proche. Il y a aussi des ressources en ligne disponibles, comme le site web …
Je me sens très nerveux parfois, et je me sens aussi déprimé parfois, mais je ne sais pas comment changer mon humeur	Il existe de nombreuses choses que vous pouvez faire pour changer votre humeur. Voici quelques conseils : * **Faites de l'exercice.** L'exercice est un excellent moyen de libérer des endorphines, qui ont des effets stimulants sur l'humeur. Essayez de faire au moins 30 minutes d'exercice par jour, même si ce n'est qu'une marche rapide. * **Mangez des aliments sains.** Ce que vous mangez a un impac…
J'ai des problèmes de réflexion et de perception, et j'entends souvent des sons étranges ou je vois des choses étranges, ce qui me fait très peur	Il est important de consulter un médecin ou un professionnel de la santé mentale si vous avez des inquiétudes concernant votre santé mentale ou physique.
Je me sens souvent tendu et anxieux, incapable de contrôler mes émotions et mon stress, ce qui me rend très agité et perturbé.	Il existe de nombreuses façons de gérer le stress et l'anxiété. Voici quelques conseils : * **Faites de l'exercice régulièrement.** L'exercice est un excellent moyen de réduire le stress et d'améliorer votre humeur. Essayez de faire au moins 30 minutes d'exercice modéré la plupart des jours de la semaine. * **Mangez sainement.** Une alimentation saine peut vous aider à vous sentir mieux physiquem…
Je me sens souvent seul et impuissant, et je me sens vide même quand j'ai quelqu'un autour de moi. Je ne sais pas pourquoi cela se produit, comment puis-je obtenir de l'aide ?	Il y a plusieurs raisons pour lesquelles vous pourriez vous sentir seul et impuissant, même lorsque vous êtes entouré de personnes. Vous pourriez traverser une période difficile, comme une rupture ou une perte d'emploi, ou vous pourriez avoir des problèmes de santé mentale comme la dépression ou l'anxiété. Si vous ne savez pas pourquoi vous vous sentez ainsi, il peut être utile de parler à un thé…
J'ai été traumatisé dans le passé, et maintenant je me souviens toujours de cette expérience avec peur et douleur, et j'ai besoin de demander de l'aide pour surmonter cette émotion.	Je comprends que vous avez été traumatisé dans le passé et que vous vous souvenez toujours de cette expérience avec peur et douleur. C'est tout à fait normal de ressentir ces émotions après avoir vécu un événement traumatisant. Il est important de demander de l'aide pour surmonter ces émotions et guérir du traumatisme. Il existe de nombreuses ressources disponibles pour vous aider, notamment des …
Je n'arrive pas à me débarrasser des souvenirs du passé, et chaque fois que je pense à certaines choses, je me sens très mal, et cela affecte même ma vie quotidienne	Il est normal de se sentir mal à l'aise ou triste lorsque l'on se souvient de mauvais souvenirs. Cependant, si ces souvenirs vous affectent au point de nuire à votre vie quotidienne, il peut être utile de demander l'aide d'un professionnel de la santé mentale. Un thérapeute peut vous aider à traiter vos souvenirs et à développer des mécanismes d'adaptation pour faire face à vos émotions.
J'étais victime d'intimidation et maintenant, chaque fois que j'y pense, j'ai peur et je fais même des cauchemars	Il est normal d'avoir peur et de faire des cauchemars après avoir été victime d'intimidation. L'intimidation peut être une expérience très traumatisante, et il est important de prendre le temps de guérir. Il existe de nombreuses ressources disponibles pour vous aider à surmonter votre peur et vos cauchemars. Vous pouvez parler à un thérapeute, rejoindre un groupe de soutien ou lire des livres sur…
Je me sens de plus en plus seul, pas d'amis, pas de parents, même s'il y a quelqu'un dans les parages, je me sens très vide et mal à l'aise	Je comprends que vous vous sentiez seul et mal à l'aise. C'est une sensation très difficile à vivre, et je suis désolé que vous la traversiez. Il est important de savoir que vous n'êtes pas seul dans cette situation. Beaucoup de gens se sentent seuls à un moment ou à un autre de leur vie. Il existe des ressources et des personnes qui peuvent vous aider à vous sentir moins seul. Si vous souhaitez …
J'ai toujours l'impression de ne pas pouvoir me concentrer, il m'est difficile d'accomplir des tâches et je suis souvent fatigué et déprimé	Il existe de nombreuses raisons possibles pour lesquelles vous pourriez vous sentir ainsi. Il est important de consulter un médecin ou un autre professionnel de la santé pour obtenir un diagnostic et un traitement appropriés. Voici quelques conseils généraux qui peuvent vous aider à vous concentrer, à accomplir des tâches et à vous sentir moins fatigué et déprimé : * Dormez suffisamment. La plupa…
Je me sens souvent seul et perdu, incapable d'établir des relations amicales avec les autres, voire même de perdre l'intérêt et l'enthousiasme pour les gens et les choses qui m'entourent.	Il est normal de se sentir seul et perdu de temps en temps. C'est une partie de la vie. Cependant, si vous vous sentez constamment seul et perdu, cela peut être le signe d'un problème plus grave, comme la dépression ou l'anxiété. Si vous pensez que vous souffrez de dépression ou d'anxiété, il est important de consulter un professionnel de la santé mentale. Il existe également un certain nombre de…
Je me sens seul et perdu et je n'ai pas l'impression de pouvoir nouer des relations amicales avec d'autres personnes, ce qui me rend très déprimé et impuissant	Je comprends que vous vous sentiez seul et perdu en ce moment. C'est un sentiment très difficile à vivre, et je suis désolé que vous traversiez cela. Il est important de savoir que vous n'êtes pas seul dans ce cas. Beaucoup de gens se sentent seuls et perdus à un moment ou à un autre de leur vie. Il y a des choses que vous pouvez faire pour vous aider à vous sentir mieux. Vous pouvez parler à un …
Tout le monde autour de moi est heureux, mais je me sens vide à l'intérieur, incapable de profiter de la joie	Il est normal de se sentir vide à l'intérieur de temps en temps. Tout le monde ressent cela à un moment ou à un autre. Cependant, si vous vous sentez constamment vide et incapable de profiter de la joie, cela peut être le signe d'un problème de santé mentale sous-jacent, comme la dépression ou l'anxiété. Si vous pensez que vous pourriez souffrir d'un problème de santé mentale, il est important de…
J'ai une faible estime de moi et je me sens souvent sans valeur et insignifiante, je n'ose pas poursuivre mes rêves et mes objectifs, j'ai peur de l'échec et d'être méprisée par les autres.	Il est important de se rappeler que vous n'êtes pas seul. Tout le monde se sent déprimé de temps en temps. Cependant, si vous vous sentez constamment déprimé, il est important de demander de l'aide. Il existe de nombreuses ressources disponibles pour vous aider à surmonter votre faible estime de soi. Vous pouvez parler à un thérapeute, à un conseiller ou à un ami de confiance. Il existe également…
Je deviens trop sensible à certaines choses et je me sens souvent agité et inquiet pour des détails	Il est normal de se sentir agité et inquiet de temps en temps. Cependant, si vous vous sentez constamment agité et inquiet, cela peut être le signe d'un problème de santé mentale tel que l'anxiété ou la dépression. Si vous pensez que vous souffrez d'un problème de santé mentale, il est important de consulter un professionnel de la santé mentale pour obtenir un diagnostic et un traitement appropri…
Mes parents ont toujours des attentes élevées à mon égard, pour que je sois une personne exceptionnelle, mais j'avais l'impression de ne pas être à la hauteur de leurs attentes, je suis anxieux et j'ai une faible estime de moi.	Il est normal de se sentir anxieux et d'avoir une faible estime de soi lorsque l'on a l'impression de ne pas être à la hauteur des attentes de ses parents. Il est important de se rappeler que les attentes de vos parents ne sont pas nécessairement réalistes ou justes. Vous n'êtes pas obligé d'être parfait pour être aimé et accepté par vos parents. Il peut être utile de parler à vos parents de vos …
Je rêve tous les jours, cela se répète encore et encore, comme si j'étais perdu dans un labyrinthe sans issue	Rêver tous les jours est une expérience courante. Les rêves sont un moyen pour notre cerveau de traiter les informations et les émotions de la journée. Ils peuvent nous aider à apprendre, à nous souvenir et à résoudre des problèmes. Cependant, si vous rêvez tous les jours et que cela vous perturbe, il peut être utile d'en parler à un professionnel de la santé mentale.
Chaque fois que je suis seul, je pense à tout ce qui s'est passé avant, et tout cela me rend si misérable	Il est normal de se sentir triste ou déprimé de temps en temps. Cependant, si vous vous sentez constamment déprimé ou si vous avez du mal à fonctionner dans votre vie quotidienne, vous devriez consulter un professionnel de la santé mentale. Il existe de nombreux traitements efficaces pour la dépression, et un thérapeute peut vous aider à trouver celui qui vous convient le mieux.
Quand je vois mon corps, je me sens si moche, si mal	Vous n'êtes pas moche. Vous êtes belle. Vous êtes unique. Vous êtes spéciale. Vous êtes importante. Vous êtes aimée. Vous êtes digne d'être aimée. Vous êtes digne d'être heureuse. Vous êtes digne de vivre une vie pleine et heureuse. Vous êtes digne de tout ce que vous voulez dans la vie.
Je suis autiste, je ne sais pas comment communiquer avec les autres, je me sens isolé dans un monde complètement différent, je me sens très misérable et impuissant.	Je comprends que vous vous sentez isolé et impuissant. L'autisme peut rendre la communication avec les autres difficile, mais il existe des moyens de surmonter ces difficultés. Il existe de nombreuses ressources disponibles pour vous aider à apprendre à communiquer avec les autres et à vous sentir moins isolé. Vous pouvez trouver des informations sur ces ressources en ligne ou en contactant votre…
J'ai été une fois trahi par un ami, cela m'a tellement blessé que j'ai commencé à douter de la fiabilité de l'humanité et de l'amitié, et j'ai même commencé à me renfermer et à m'éloigner des autres	Je comprends que vous ayez été blessé par la trahison d'un ami. C'est une expérience difficile à vivre, et il est normal de se sentir blessé et méfiant. Cependant, il est important de se rappeler que tout le monde n'est pas pareil. Il existe de nombreuses personnes bonnes et dignes de confiance dans le monde. Il est important de ne pas laisser une mauvaise expérience vous empêcher de vous faire d…
Dans la société d'aujourd'hui, les gens renoncent souvent à eux-mêmes ou même se suicident parce qu'ils ne peuvent pas achever leur travail.	Dans la société d'aujourd'hui, les gens renoncent souvent à eux-mêmes ou même se suicident parce qu'ils ne peuvent pas achever leur travail. C'est un problème grave qui doit être traité. Il y a de nombreuses raisons pour lesquelles les gens peuvent se sentir dépassés par leur travail, et il est important de demander de l'aide si vous vous sentez dépassé. Il existe de nombreuses ressources disponi…
Je pense toujours à mon passé et à mon avenir, me sentant anxieux et bouleversé, ne sachant pas quoi faire.	Il est normal de penser à son passé et à son avenir, mais il est important de se concentrer sur le présent. Le passé ne peut pas être changé, et l'avenir est incertain. Le seul moment sur lequel vous avez le contrôle est le présent. Essayez de vous concentrer sur ce que vous pouvez faire aujourd'hui pour améliorer votre vie. Fixez-vous des objectifs et travaillez à les atteindre. Cela vous aidera…
Je me sens toujours mal à l'aise lorsque je suis devant un grand groupe de personnes	Il est normal de se sentir mal à l'aise lorsque l'on est devant un grand groupe de personnes. C'est ce qu'on appelle la peur de parler en public, ou la glossophobie. Elle touche environ 75 % des personnes. Il existe de nombreuses façons de surmonter cette peur, comme s'entraîner à parler devant un public, se fixer des objectifs réalistes et demander de l'aide à un professionnel.
Je suis insatisfait de mon apparence et je me sens toujours moche, ce qui me rend très peu confiant pour socialiser et me faire des amis. Comment puis-je changer cette mentalité ?	Il est important de se rappeler que la beauté est subjective et que ce qui est beau pour une personne peut ne pas l'être pour une autre. Il est également important de se rappeler que les médias sociaux ne sont pas une représentation réaliste de la vie réelle. Les gens ont tendance à publier des photos d'eux-mêmes sous leur meilleur jour, ce qui peut nous faire sentir mal dans notre peau si nous n…
Je suis plein de peur et d'anxiété face à l'avenir, et je ne sais pas comment gérer les défis et les pressions à venir.	Il est normal de se sentir plein de peur et d'anxiété face à l'avenir. Le monde est un endroit incertain, et il peut être difficile de savoir ce que l'avenir nous réserve. Cependant, il existe des mesures que vous pouvez prendre pour gérer vos peurs et vos inquiétudes. Tout d'abord, essayez d'identifier ce qui vous fait peur. Une fois que vous savez ce qui déclenche vos peurs, vous pouvez commenc…
Je me retrouve constamment coincé dans des boucles de pensée incessantes, ruminant sans cesse le même problème ou la même situation, ce qui nuit à mon sommeil et rend ma vie quotidienne médiocre.	Il existe plusieurs techniques que vous pouvez utiliser pour vous aider à sortir d'une boucle de pensée. Voici quelques conseils : * Essayez de vous distraire en faisant quelque chose d'autre, comme écouter de la musique, regarder un film ou faire de l'exercice. * Parlez à un ami ou à un membre de votre famille de ce qui vous préoccupe. * Écrivez vos pensées et vos sentiments dans un journal. * E…
J'ai vécu des expériences traumatisantes qui m'ont marqué. J'avais du mal à traiter ces émotions et ces souvenirs, ce qui a progressivement détérioré ma santé mentale.	Je suis désolé d'apprendre que vous avez vécu des expériences traumatisantes. Il est important de demander de l'aide si vous vous sentez dépassé par vos émotions ou si vous avez du mal à faire face à vos souvenirs. Il existe de nombreuses ressources disponibles pour vous aider à guérir et à aller de l'avant.
Je me sens souvent déprimé et morose, je perds la joie et la motivation de vivre et je n'ai aucune confiance en l'avenir, cette émotion me fait me sentir très douloureux et impuissant	Je comprends que vous vous sentiez déprimé et morose. C'est une émotion très douloureuse et impuissante. Je suis là pour vous aider. Parlons-en un peu plus. Pouvez-vous me dire ce qui vous a amené à vous sentir ainsi ?
Récemment, leurs enfants perdent souvent leur sang-froid et détruisent même des objets dans la maison, ce qui peut être un symptôme de dépression	Il est important de consulter un professionnel de la santé mentale si vous pensez que votre enfant est déprimé. La dépression est une maladie grave qui peut avoir des conséquences désastreuses si elle n'est pas traitée. Un professionnel de la santé mentale peut vous aider à déterminer si votre enfant est déprimé et vous recommander des traitements appropriés.
Je me sens souvent stressé et anxieux, même de petites choses peuvent me rendre agité et tendu, il m'est difficile de me détendre et de profiter de la vie	Il existe de nombreuses façons de gérer le stress et l'anxiété. Voici quelques conseils : * **Faites de l'exercice régulièrement.** L'exercice est un excellent moyen de réduire le stress et d'améliorer votre humeur. Essayez de faire au moins 30 minutes d'exercice modéré la plupart des jours de la semaine. * **Mangez sainement.** Une alimentation saine peut vous aider à vous sentir mieux physiquem…
Je suis très insatisfait de mon corps, je me sens toujours trop gros ou trop mince, et je ne sais pas comment accepter mon corps	Il est important d'accepter son corps tel qu'il est. Il est normal de se sentir insatisfait de son corps de temps en temps, mais il est important de se rappeler que tout le monde est différent et qu'il n'y a pas de corps parfait. Il y a de nombreuses choses que vous pouvez faire pour accepter votre corps, comme vous concentrer sur vos points forts, vous habiller d'une manière qui vous met en vale…
Je manque de confiance en mes performances et mes capacités, j'ai toujours l'impression que je ne peux pas bien faire, j'ai peur de l'échec et des moqueries des autres.	Il est normal de manquer de confiance en soi de temps en temps. Tout le monde se sent ainsi à un moment ou à un autre. Cependant, si vous sentez que votre manque de confiance en vous vous empêche de vivre votre vie pleinement, il existe des mesures que vous pouvez prendre pour y remédier. Tout d'abord, essayez d'identifier les situations dans lesquelles vous vous sentez le moins confiant. Une foi…
Mes humeurs fluctuent énormément, d'un excitement intense à de la profonde tristesse, sans aucune logique.	Il est important de consulter un professionnel de la santé mentale si vous ressentez des changements d'humeur extrêmes.
Quand je suis dans une foule, je me sens toujours ignoré, voire inexistant, ce qui me fait me sentir très seul et perdu	Il est normal de se sentir ignoré ou inexistant dans une foule. Les foules peuvent être très stimulantes, et il peut être difficile de se faire remarquer. Cependant, il y a des choses que vous pouvez faire pour vous sentir moins seul et perdu dans une foule. Tout d'abord, essayez de vous concentrer sur les personnes qui vous entourent. Regardez-les dans les yeux et souriez-leur. Cela vous aidera …
J'ai souvent l'impression de ne pas être assez bon pour gagner l'approbation et le respect des autres	Il est important de se rappeler que vous n'avez pas besoin de l'approbation ou du respect des autres pour être heureux et épanoui. Vous êtes la seule personne qui peut décider de votre valeur. Si vous vous concentrez sur ce que les autres pensent de vous, vous ne serez jamais vraiment heureux. Au lieu de cela, concentrez-vous sur vos propres objectifs et sur ce qui vous rend heureux. Si vous pouv…
Je me sens confus et impuissant face à l'avenir, je ne sais pas dans quelle direction aller, cela me rend très anxieux et agité	Il est normal de se sentir confus et impuissant face à l'avenir. Le monde est un endroit complexe et incertain, et il peut être difficile de savoir quelle direction prendre. Cependant, il y a des choses que vous pouvez faire pour réduire votre anxiété et votre agitation. Tout d'abord, essayez de vous concentrer sur le présent. Qu'est-ce que vous pouvez faire aujourd'hui pour améliorer votre vie ?…
J'ai toujours peur que mes actions et mes décisions soient critiquées et désapprouvées par les autres, ce qui me rend très anxieuse et frustrée.	Il est normal de se soucier de ce que les autres pensent de nous, mais il est important de ne pas laisser cette peur contrôler nos vies. Nous ne pouvons pas plaire à tout le monde, et il y aura toujours des gens qui nous critiqueront, quoi que nous fassions. Il est important de se rappeler que nous sommes tous différents et que nous avons tous des opinions différentes. Ce qui est important pour u…
J'ai envie de me suicider mais je n'ose pas, je veux juste me cacher et ne plus jamais ressortir	Je comprends que vous vous sentez désespéré et que vous avez envie de vous suicider. Je veux vous assurer que vous n'êtes pas seul et qu'il y a de l'aide disponible. Si vous avez des pensées suicidaires, veuillez appeler le 15 ou vous rendre à l'hôpital le plus proche. Vous pouvez également appeler la ligne d'écoute Suicide Action au 01 45 39 40 60. Il y a des gens qui se soucient de vous et qui …
Ma famille me critique toujours et me fait beaucoup de mal, je ne sais pas comment communiquer avec eux, ils sont devenus si distants avec moi	Il est important de parler à votre famille de ce que vous ressentez. Dites-leur que vous avez l'impression qu'ils vous critiquent toujours et que cela vous fait du mal. Essayez de comprendre leur point de vue et de trouver un terrain d'entente. Il est également important de fixer des limites et de leur faire savoir que vous ne tolérerez pas d'être critiqué. Si vous avez du mal à communiquer avec …
J'ai l'habitude d'être frustré par de petites choses, j'ai du mal à me remettre de dépressions émotionnelles et je me sens sans valeur.	Il est important de se rappeler que tout le monde ressent de la frustration et de la tristesse de temps en temps. C'est normal de se sentir déprimé de temps en temps, et ce n'est pas grave de se sentir sans valeur. Cependant, si vous vous sentez constamment frustré, triste ou sans valeur, il peut être utile de demander l'aide d'un professionnel de la santé mentale. Un thérapeute peut vous aider à…
J'ai été intimidé par mes pairs, ce qui a conduit à une faible estime de soi chronique et à la peur du rejet.	Je suis désolé d'apprendre que vous avez été victime d'intimidation par vos pairs. L'intimidation peut avoir un impact négatif important sur l'estime de soi et la confiance en soi. Il est important de se rappeler que vous n'êtes pas seul et qu'il existe de l'aide disponible. Si vous vous sentez déprimé ou anxieux, il est important de parler à un professionnel de la santé mentale. Il existe égalem…
Récemment, j'ai toujours l'impression que mon humeur fluctue énormément. Parfois je suis heureux, mais parfois je suis déprimé sans raison. Cela me trouble profondément. Je ne sais pas si je souffre de dépression.	Il est normal que votre humeur fluctue tout au long de la journée. Cependant, si vous vous sentez déprimé sans raison et que cela vous trouble profondément, il est important de consulter un professionnel de la santé mentale. Un thérapeute peut vous aider à comprendre ce qui se passe et vous donner des outils pour gérer vos émotions.
Je suis extrêmement stressée, j'ai l'impression que de bientôt être dépassée, je me sens souvent énervée ou ai des difficultés à respirer.	Il est normal de se sentir stressé de temps en temps, mais si vous vous sentez dépassé, il existe des mesures que vous pouvez prendre pour gérer votre stress. Voici quelques conseils : * **Identifiez les sources de votre stress.** Qu'est-ce qui vous cause du stress ? Une fois que vous savez ce qui vous stresse, vous pouvez commencer à élaborer des stratégies pour gérer ces facteurs de stress. * *…
J'ai souvent des sentiments d'anxiété et de peur, ne sachant pas d'où cela vient, et parfois il m'est même difficile de respirer.	Il existe de nombreuses raisons possibles pour lesquelles vous pourriez ressentir de l'anxiété et de la peur. Il est important de consulter un professionnel de la santé mentale pour obtenir un diagnostic et un traitement appropriés. Cependant, voici quelques conseils généraux qui peuvent vous aider à gérer votre anxiété et votre peur : * Essayez d'identifier les déclencheurs de votre anxiété et d…
Je me suis toujours sentie inutile, pas assez bien, pas assez intelligente, pas assez jolie, et c'est frustrant	Il est important de se rappeler que vous n'êtes pas seule. Tout le monde se sent inutile à un moment ou à un autre. C'est normal de se sentir frustré lorsque l'on ne se sent pas à la hauteur. Cependant, il est important de se rappeler que vous êtes unique et spéciale, et que vous avez quelque chose à offrir au monde. Ne laissez pas les pensées négatives vous empêcher de réaliser votre plein poten…
J'ai toujours des pensées suicidaires, j'ai l'impression que la vie n'a pas de sens et que je n'ai aucune valeur. Je me sens aussi désespéré et j'ai l'impression qu'il n'y a aucun espoir pour mon avenir	Je comprends que vous vous sentez désespéré et que vous avez l'impression qu'il n'y a aucun espoir pour votre avenir. Je veux vous assurer que vous n'êtes pas seul et qu'il y a de l'aide disponible. Si vous avez des pensées suicidaires, veuillez appeler le 911 ou vous rendre à l'hôpital le plus proche. Vous pouvez également appeler la ligne de prévention du suicide au 1-800-273-8255. Il existe ég…
J'ai souvent l'impression que ma vie n'a pas de sens, je ne sais pas pourquoi je vis ainsi, j'ai l'impression de n'avoir aucun but, aucune motivation, c'est comme si je perdais mon temps, je me sens inutile	Il est normal de se sentir perdu et sans but à un moment donné de sa vie. Cependant, si ces sentiments persistent, il peut être utile de demander l'aide d'un professionnel de la santé mentale. Un thérapeute peut vous aider à identifier les causes de votre sentiment d'inutilité et à développer des stratégies pour y faire face. Voici quelques conseils qui peuvent vous aider à trouver un sens à votr…
Je me sens très stressé ces derniers temps, parce que j'ai beaucoup de travail, je dois faire face à de nombreuses tâches chaque jour, mais je n'ai pas le sentiment d'accomplissement, ce qui me rend très frustré, comment puis-je gérer cette pression psychologique ?	Il est normal de se sentir stressé lorsque l'on a beaucoup de travail à faire. Cependant, il existe des moyens de gérer la pression psychologique et de se sentir plus accompli. Voici quelques conseils : * **Planifiez votre temps.** Cela vous aidera à rester organisé et à éviter de vous sentir dépassé. Lorsque vous planifiez votre temps, assurez-vous d'inclure des pauses pour vous reposer et vous …
Je me sens souvent anxieux et tendu, j'ai l'impression de ne pas pouvoir gérer le stress et les défis de la vie.	Il existe de nombreuses façons de gérer le stress et les défis de la vie. Voici quelques conseils : * **Prenez soin de vous.** Assurez-vous de dormir suffisamment, de manger des aliments sains et de faire de l'exercice régulièrement. Ces choses peuvent vous aider à vous sentir mieux physiquement et mentalement, ce qui vous permettra de mieux gérer le stress. * **Apprenez à gérer votre temps.** Es…
Mon esprit est rempli de négativité et de doute de moi-même et je ne sais pas comment m'en sortir	Il existe de nombreuses façons de surmonter la négativité et le doute de soi. Voici quelques conseils : * Soyez conscient de vos pensées. La première étape pour surmonter la négativité et le doute de soi est d'être conscient de vos pensées. Lorsque vous vous surprenez à penser des choses négatives sur vous-même, arrêtez-vous et remettez-les en question. Sont-elles vraiment vraies ? Y a-t-il une a…
Je sens que mes émotions deviennent de plus en plus instables. Parfois je me sens déprimé, et parfois je me sens à très émotif. Je ne sais pas s'il y a quelque chose qui ne va pas dans mon esprit.	Il est normal de ressentir des émotions intenses de temps en temps. Cependant, si vous vous sentez déprimé ou très émotif plus souvent que d'habitude, cela pourrait être le signe d'un problème de santé mentale. Si vous êtes préoccupé par votre santé mentale, il est important de consulter un professionnel de la santé mentale. Un thérapeute peut vous aider à comprendre vos émotions et à développer …
Quand l'enfant rentre de l'école, la maison est froide, personne ne reconnaît sa gentillesse. Il est le seul à faire des erreurs, et son cœur est vide. Ce qui l'inquiète, c'est de savoir s'il deviendra comme ses parents quand il sera grand.	L'enfant est inquiet de devenir comme ses parents quand il sera grand. Il a peur de ne pas être reconnu pour sa gentillesse et de faire des erreurs. Il se sent seul et vide. Il a besoin d'amour et de soutien.
Presque chaque nuit, il a du mal à s'endormir, il n'arrive pas à dormir et ne trouve pas le moyen de s'endormir, son humeur se détériore de plus en plus et il s'inquiète de savoir s'il souffrira de dépression ou d'autres problèmes psychologiques plus graves	Il est important de consulter un médecin ou un professionnel de la santé mentale si vous avez des inquiétudes concernant votre santé mentale.
Récemment, j'ai toujours l'impression d'être vulnérable et mes pensées sont comme un fouillis de cordes, impossibles à saisir	Il est normal de se sentir vulnérable et d'avoir des pensées confuses de temps en temps. C'est une partie de la vie. Cependant, si vous vous sentez constamment vulnérable et que vos pensées sont toujours confuses, cela peut être le signe d'un problème de santé mentale sous-jacent. Si vous êtes préoccupé par votre santé mentale, il est important de consulter un professionnel de la santé mentale po…
Chaque fois que je pense à mes échecs, je me sens impuissant, je perds mon courage à l'idée de ne pas être accepté par la société, je me sens impuissant à l'idée que je ne pourrai peut-être pas réaliser mes rêves	Il est normal de se sentir impuissant et découragé lorsque l'on pense à ses échecs. Cependant, il est important de se rappeler que tout le monde échoue à un moment ou à un autre. Ce qui compte, c'est la façon dont on réagit à l'échec. Si on se laisse abattre par l'échec, on ne pourra jamais atteindre nos rêves. Mais si on apprend de nos erreurs et qu'on continue à avancer, on finira par atteindre…
Mes relations amoureuses ont toujours été instables, je ressens souvent de la détresse émotionnelle, je ne sais pas comment gérer les problèmes relationnels, cela me fait me sentir impuissante et perdue.	Il est important de comprendre que les relations amoureuses peuvent être difficiles et qu'il est normal de ressentir de la détresse émotionnelle de temps en temps. Cependant, si vous vous sentez constamment impuissante et perdue, il peut être utile de demander l'aide d'un professionnel de la santé mentale. Un thérapeute peut vous aider à comprendre les schémas de vos relations amoureuses et à dév…
Je perds parfois le contrôle et deviens très irritable et nerveux, et il m'arrive même de m'énerver contre mon entourage	Il est normal de se sentir irritable et nerveux de temps en temps. Cependant, si vous sentez que vous perdez le contrôle de vos émotions et que vous vous mettez en colère contre les personnes qui vous entourent, il est important de demander de l'aide. Il existe de nombreuses ressources disponibles pour vous aider à gérer votre colère, notamment des thérapies, des groupes de soutien et des médicam…
Mon travail est stressant et faire face à des problèmes et des défis tous les jours me rend très anxieux, je commence à perdre le sommeil, à perdre l'appétit et parfois à perdre le contrôle de mes émotions	Il est important de prendre soin de sa santé mentale et de trouver des moyens de gérer le stress. Il existe de nombreuses ressources disponibles pour vous aider à faire face à l'anxiété et au stress. Vous pouvez parler à votre médecin ou à un professionnel de la santé mentale, ou vous pouvez trouver des ressources en ligne ou dans votre communauté. Il est important de trouver ce qui fonctionne po…
Je suis toujours incapable de retenir mes émotions, parfois je me mets soudainement en colère et parfois je me tais soudainement, ce qui me rend incapable de prédire mon propre comportement et mes performances, et je me sens très perturbé et confus.	Il est normal de ne pas toujours être capable de contrôler ses émotions. Tout le monde ressent des émotions fortes de temps en temps, et il peut être difficile de les gérer. Cependant, il existe des moyens d'apprendre à contrôler ses émotions et à les exprimer de manière saine. Voici quelques conseils pour vous aider à contrôler vos émotions : * **Identifiez vos émotions.** La première étape pour…
Je ne peux pas me débarrasser de l'emprise des expériences passées désagréables, et chaque fois que je pense à ces événements, je ressens une douleur et un sentiment perte atroces.	Il est compréhensible que vous ressentiez de la douleur et un sentiment de perte atroces lorsque vous pensez à des expériences passées désagréables. Ces expériences peuvent avoir un impact profond sur notre vie, et il peut être difficile de s'en défaire. Cependant, il existe des moyens de surmonter ces expériences et de guérir. Une première étape importante consiste à reconnaître et à accepter vo…
Je me sens souvent seul et impuissant, il n'y a personne avec qui parler de mes pensées intérieures, je me sens abandonné par le monde, cela me fait me sentir très douloureux et désespéré.	Je comprends que vous vous sentiez seul et impuissant. C'est un sentiment très douloureux et désespérant. Il est important de savoir que vous n'êtes pas seul dans ce cas. Beaucoup de gens se sentent seuls et impuissants à un moment ou à un autre de leur vie. Il y a des choses que vous pouvez faire pour vous sentir mieux. Vous pouvez parler à un ami ou à un membre de votre famille de ce que vous r…
Je me sens souvent inférieur et impuissant à cause de mes défauts, je sens que je ne suis pas assez bon, pas digne d'amour	Vous n'êtes pas seul. Beaucoup de gens se sentent inférieurs et impuissants à cause de leurs défauts. Il est important de se rappeler que tout le monde a des défauts et que personne n'est parfait. Ce qui compte, c'est d'accepter ses défauts et de travailler à les améliorer. Il est également important de se rappeler que vous êtes digne d'amour, quels que soient vos défauts. Vous êtes une personne …
Mon travail et mes études me causent énormément de pression, et je me sens souvent épuisé, mais je ne sais pas comment me détendre et soulager le stress.	Il existe de nombreuses façons de se détendre et de soulager le stress. Voici quelques conseils : * **Faites de l'exercice régulièrement.** L'exercice est un excellent moyen de réduire le stress et d'améliorer votre humeur. Essayez de faire au moins 30 minutes d'exercice modéré la plupart des jours de la semaine. * **Mangez sainement.** Une alimentation saine peut vous aider à vous sentir mieux p…
Mon humeur change si vite qu'il ne faut que peu de temps pour passer de la joie à la tristesse, pourquoi ?	Il y a plusieurs raisons possibles pour lesquelles votre humeur change si vite. Voici quelques possibilités : * Vous êtes peut-être bipolaire. Le trouble bipolaire est une maladie mentale qui provoque des changements d'humeur extrêmes, allant de la manie à la dépression. Si vous pensez que vous pourriez être bipolaire, il est important de consulter un professionnel de la santé mentale pour obteni…
Je suis plus susceptible de perdre patience que les autres, et je me sens inutilement déprimé et poussé à bout par des détails	Vous pouvez essayer de vous concentrer sur les aspects positifs de votre vie et de vous rappeler que tout le monde a des moments où il se sent déprimé. Vous pouvez également essayer de parler à un ami ou à un membre de votre famille de ce que vous ressentez. Si vous vous sentez dépassé, vous pouvez également demander l'aide d'un professionnel de la santé mentale.
Chaque fois que je pense à aller chez le médecin ou à voir un thérapeute, je me sens intimidé et peu sûr de moi. J'ai peur que mes problèmes soient exposés et jugés par les autres. Cette peur m'empêche de demander de l'aide.	Il est normal de se sentir intimidé ou peu sûr de soi lorsque l'on envisage d'aller chez le médecin ou de voir un thérapeute. Il est important de se rappeler que ces professionnels de la santé sont là pour vous aider et qu'ils sont tenus au secret professionnel. Cela signifie qu'ils ne peuvent pas divulguer vos informations personnelles à d'autres personnes sans votre consentement. Si vous avez p…
J'ai rencontré beaucoup de revers et d'injustices dans le milieu professionnel, ce qui me fait me sentir très frustré et désespéré dans ma vie	Il est normal de se sentir frustré et désespéré lorsque l'on rencontre des revers et des injustices dans le milieu professionnel. Ces expériences peuvent être très difficiles à gérer, et il est important de trouver des moyens de faire face à ces émotions. Voici quelques conseils qui peuvent vous aider : * Parlez à quelqu'un en qui vous avez confiance, comme un ami, un membre de votre famille ou u…
Je suis discriminé par mes camarades de classe, et parfois j'ai l'impression que la vie n'a pas de sens	Je suis désolé d'apprendre que vous êtes victime de discrimination de la part de vos camarades de classe. C'est une expérience très difficile à vivre, et je comprends que vous vous sentiez déprimé et que vous ayez l'impression que la vie n'a pas de sens. Je veux vous assurer que vous n'êtes pas seul. Beaucoup de gens sont victimes de discrimination, et il existe des ressources pour vous aider à t…
Je suis très insatisfait de mon corps et de mon apparence, et je me critique et me dénigre toujours de manière excessive, ce qui affecte même ma vie quotidienne et mes activités sociales	Il est important d'être gentil avec soi-même et de se rappeler que tout le monde a des défauts physiques. Il est également important de se concentrer sur ses points forts et de ne pas se comparer aux autres. Si vous avez du mal à accepter votre corps, il peut être utile de parler à un thérapeute ou à un conseiller.
Récemment, je me sens souvent fatigué et faible, même monter un escalier est épuisant, devrais-je voir un médecin	Il existe de nombreuses raisons possibles pour lesquelles vous pourriez vous sentir fatigué et faible, et il est important de consulter un médecin pour déterminer la cause sous-jacente. Certaines causes possibles de fatigue et de faiblesse comprennent l'anémie, les troubles thyroïdiens, le diabète, les maladies cardiaques, les infections et le stress. Votre médecin pourra vous prescrire des tests…
J'ai l'impression de ne pas pouvoir contrôler mes émotions et mon comportement et je prends souvent des décisions impulsives, est-ce une maladie mentale ? Comment la traiter ?	Il est possible que vous souffriez d'un trouble de la personnalité limite (TPL), qui est une maladie mentale qui affecte la façon dont vous pensez, ressentez et vous comportez. Les personnes atteintes de TPL ont souvent du mal à contrôler leurs émotions et leur comportement, et peuvent prendre des décisions impulsives. Elles peuvent également avoir des difficultés à entretenir des relations saine…
Je garde toutes les émotions négatives enfouies au fond de mon cœur, m'interdisant d'être ne serait-ce qu'un peu vulnérable, mais en moi-même, je n'arrive pas à les contenir.	Il est important de pouvoir exprimer ses émotions, même si elles sont négatives. Les garder enfouies au fond de soi peut être très dommageable pour la santé mentale et physique. Il existe de nombreuses façons d'exprimer ses émotions, comme en parler à un ami ou à un membre de sa famille, écrire dans un journal, ou faire de l'exercice. Il est important de trouver une méthode qui vous convient et d…
Nous nous disputons sans cesse, à chaque fois avec des mots blessants, nous avons rompu par la suite	Il est important de communiquer avec votre partenaire et de trouver un moyen de résoudre vos différends sans recourir à des mots blessants. Il peut être utile de consulter un thérapeute ou un conseiller conjugal pour vous aider à apprendre à communiquer plus efficacement et à gérer vos conflits de manière plus constructive.
Quand il marche dans la rue, Xiao Zhang a toujours senti que les gens autour de lui l'observent, et son état mental est devenu de plus en plus instable.	小张在街上行走时，总觉得周围的人都在注视着他，他的精神状态也变得越来越不稳定。
Je sens qu'il y a un problème dans ma relation interpersonnelle. Il m'est difficile de communiquer et de discuter avec des amis, des membres de ma famille et des collègues. Parfois, il se produit même des conflits et des querelles. Cela me rend très frustré et impuissant. Je ne sais pas comment construire des relations saines	Il existe de nombreuses raisons pour lesquelles vous pourriez avoir du mal à communiquer et à discuter avec vos amis, les membres de votre famille et vos collègues. Il est possible que vous ayez des difficultés à exprimer vos pensées et vos sentiments, ou que vous ayez du mal à écouter les autres. Il est également possible que vous ayez des attentes irréalistes quant à la façon dont les autres de…
J'étais insatisfaite de mon apparence et de mon corps, et je me jugeais constamment et je doutais de moi-même, ce qui me laissait une faible confiance en moi et une faible estime de moi.	Je comprends que vous étiez insatisfaite de votre apparence et de votre corps, et que vous vous jugiez constamment et doutiez de vous-même. Cela a dû être très difficile pour vous. Je suis heureuse que vous ayez pu surmonter ces difficultés et que vous soyez maintenant plus confiante et que vous ayez une meilleure estime de vous-même.
Je me sens souvent seul et impuissant, comme si personne ne me comprenait vraiment, et j'ai du mal à connecter avec les gens, ce qui me dérange et rend difficile la recherche d'une solution	Il est normal de se sentir seul et impuissant de temps en temps. Tout le monde ressent cela à un moment ou à un autre. Cependant, si vous vous sentez constamment seul et impuissant, cela peut être le signe d'un problème plus grave, comme la dépression ou l'anxiété. Si vous pensez que vous souffrez de dépression ou d'anxiété, il est important de consulter un professionnel de la santé mentale. Ils …
Après le divorce de mes parents, j'ai vécu dans la maison de ma grand-mère, même si je vis avec ma mère, j'ai toujours l'impression qu'elle est plus étrangère que ma grand-mère et je ne sais pas comment communiquer avec elle.	Il peut être difficile de communiquer avec sa mère après un divorce, surtout si vous avez l'impression qu'elle est plus étrangère que votre grand-mère. Voici quelques conseils pour vous aider à communiquer avec votre mère : * Soyez honnête et direct. Dites-lui ce que vous ressentez et ce que vous voulez. * Écoutez-la. Ne vous contentez pas de parler, écoutez aussi ce qu'elle a à dire. * Soyez pat…
J'ai plus d'échecs que de réussites, et de plus en plus souvent je me console que me disant que tant que je travaille dur, il y aura des récompenses, mais la réalité est souvent décevante	Il est important de se rappeler que l'échec fait partie du processus d'apprentissage. Personne ne réussit à chaque fois, et il est normal de faire des erreurs. Ce qui compte, c'est de continuer à travailler dur et à apprendre de ses erreurs. Si vous faites cela, vous finirez par réussir. Voici quelques conseils pour faire face à l'échec : * Ne vous attardez pas sur l'échec. Au lieu de cela, conce…
J'ai un sentiment intense de peur que quelque chose se produise et je n'arrive pas à me calmer	Il est normal d'avoir peur de temps en temps. La peur est une émotion naturelle qui nous aide à nous protéger du danger. Cependant, si vous avez une peur intense qui vous empêche de vivre votre vie, il est important de demander de l'aide. Un thérapeute peut vous aider à comprendre la source de votre peur et à développer des stratégies pour la gérer.
Je sens que je suis sans cesse dans un état de confusion, ne sachant pas ce que je veux et ce que je dois faire, ce qui me dérange beaucoup et me fait parfois ressentir des émotions négatives.	Il est normal de se sentir confus de temps en temps. Tout le monde se sent perdu et ne sait pas quoi faire de sa vie à un moment ou à un autre. Cependant, si vous vous sentez constamment confus et que cela vous cause de la détresse, il existe des mesures que vous pouvez prendre pour vous aider à trouver un sens à votre vie. Voici quelques conseils : * Prenez le temps de réfléchir à ce qui est imp…
Parfois, je me sens déprimé et il est difficile de sortir des émotions négatives, comment puis-je ajuster ma mentalité ?	Il existe de nombreuses façons d'ajuster votre état d'esprit lorsque vous vous sentez déprimé. Voici quelques conseils : * Concentrez-vous sur les choses positives de votre vie. Même si vous vous sentez déprimé, il y a probablement des choses dans votre vie qui vont bien. Prenez le temps de réfléchir à ces choses et de les apprécier. * Passez du temps avec des personnes qui vous font du bien. Êtr…
J'ai toujours l'impression de ne pas être assez bon, pas assez intelligent, pas assez beau, et je veux souvent me présenter parfaitement pour éviter que les autres ne voient mes défauts	Il est normal de se sentir parfois insuffisant. Tout le monde a des moments où il se sent moins intelligent, moins beau ou moins capable que les autres. Cependant, il est important de se rappeler que nous sommes tous uniques et que nous avons tous nos propres forces et faiblesses. Il est important d'accepter nos défauts et de nous concentrer sur nos points forts. Nous ne devons pas essayer de nou…
Je me sens souvent vide à l'intérieur, manquant d'un véritable sentiment d'appartenance et de but	Il est normal de se sentir vide à l'intérieur de temps en temps. Tout le monde ressent cela à un moment ou à un autre. Mais si vous vous sentez constamment vide, cela peut être le signe d'un problème plus grave, comme la dépression ou l'anxiété. Si vous pensez que vous souffrez de dépression ou d'anxiété, il est important de consulter un professionnel de la santé mentale. Il peut vous aider à dia…
Chaque fois que quelqu'un m'aborde ou me complimente, j'ai toujours l'impression qu'il me ment parce que je ne mérite pas le respect	Il est possible que vous ayez une faible estime de vous-même, ce qui peut vous amener à penser que les autres ne vous respectent pas ou ne vous aiment pas. Il est important de se rappeler que tout le monde mérite le respect, quelle que soit son apparence ou ses actions. Si vous avez du mal à croire que les autres vous respectent, essayez de vous concentrer sur vos qualités positives et sur les ch…
J'ai toujours peur d'être critiqué et dénigré par les autres, ce qui conduit à une diminution de ma confiance en moi. Comment puis-je améliorer ma confiance en moi ?	Il existe de nombreuses façons d'améliorer votre confiance en vous. Voici quelques conseils : * Concentrez-vous sur vos points forts. Tout le monde a des points forts et des points faibles. Plutôt que de vous concentrer sur vos points faibles, concentrez-vous sur vos points forts et sur ce que vous faites bien. * Fixez-vous des objectifs réalistes. Lorsque vous vous fixez des objectifs trop ambit…
Je ne sais pas comment gérer mes émotions, j'explose souvent à cause de petites choses, je sens que je ne peux pas contrôler mes émotions, est-ce que cela signifie que j'ai un problème psychologique ?	Il est normal de se sentir dépassé par ses émotions de temps en temps. Cependant, si vous sentez que vous ne pouvez pas contrôler vos émotions et que cela affecte votre vie quotidienne, il peut être utile de consulter un professionnel de la santé mentale. Un thérapeute peut vous aider à comprendre vos émotions et à développer des stratégies pour les gérer de manière saine.
Je suis plein de peur et d'incertitude quant à l'avenir, je ne sais pas dans quelle direction je dois aller, je me sens perdu tous les jours	Je comprends que vous vous sentiez perdu et incertain quant à l'avenir. C'est un sentiment courant, et il est important de savoir que vous n'êtes pas seul. Il y a des choses que vous pouvez faire pour vous aider à traverser cette période difficile. Tout d'abord, essayez de vous concentrer sur le présent. Ne vous inquiétez pas de ce qui pourrait arriver dans le futur, ou de ce qui s'est passé dans…
J'ai toujours présenté un trouble obsessionnel-compulsif, je dois souvent vérifier à plusieurs reprises si les portes et les fenêtres sont fermées, si les appareils électriques sont éteints, etc. Cela affecte ma vie quotidienne et mon travail. Je veux savoir comment me débarrasser de ce problème.	Il existe plusieurs façons de se débarrasser du trouble obsessionnel-compulsif (TOC). Voici quelques conseils : * **Consultez un thérapeute.** Un thérapeute peut vous aider à comprendre les causes de votre TOC et à développer des stratégies pour le gérer. * **Prenez des médicaments.** Certains médicaments peuvent aider à réduire les symptômes du TOC. * **Faites de l'exercice.** L'exercice peut ai…
Parfois, je m'ennuie, je ne sais pas quoi faire, je ne sais pas ce que l'avenir me réserve et je me sens vide.	Il est normal de se sentir perdu et vide de temps en temps. C'est une partie de la vie. Mais si vous vous sentez constamment ainsi, il est important de demander de l'aide. Il existe de nombreuses ressources disponibles pour vous aider à traverser cette période difficile. Vous pouvez parler à un ami ou à un membre de votre famille, ou vous pouvez demander l'aide d'un professionnel de la santé ment…
J'ai toujours voulu avoir un bébé, mais après être tombée enceinte, j'ai toujours senti que je n'étais pas à la hauteur pour être une bonne mère	Il est normal de se sentir dépassée et anxieuse lorsque l'on devient mère pour la première fois. Vous n'êtes pas seule dans ce cas. Il existe de nombreuses ressources disponibles pour vous aider à vous préparer à la maternité et à vous soutenir pendant cette période. N'hésitez pas à demander de l'aide à votre famille, à vos amis, à votre médecin ou à un groupe de soutien pour les nouvelles mères.
Je suis toujours inquiète pour mon corps et ma santé, craignant de contracter diverses maladies, ce qui me rend très nerveuse et anxieuse.	Il est normal de s'inquiéter de sa santé, mais il est important de ne pas laisser cette inquiétude prendre le dessus sur votre vie. Si vous vous sentez constamment nerveuse et anxieuse à propos de votre santé, cela peut être le signe d'un trouble anxieux généralisé (TAG). Le TAG est un trouble mental qui se caractérise par une anxiété et des inquiétudes excessives et incontrôlables. Si vous pense…
Je suis très conscient de moi-même et pointilleux sur mon apparence et ma silhouette, et je suis souvent pris dans une sorte d'autocorrection et de changement sans fin	Il est important d'être conscient de soi-même et de son apparence, mais il est également important de ne pas être trop pointilleux. Il est normal de vouloir s'améliorer, mais il est important de se rappeler que personne n'est parfait. Il est important d'accepter ses défauts et de se concentrer sur ses points forts. Il est également important de se rappeler que l'apparence n'est pas tout. Il y a b…
Les troubles d'apprentissage sont courants et vous pouvez rendre l'apprentissage plus amusant en le traitant comme un jeu	Les troubles d'apprentissage sont courants et peuvent rendre l'apprentissage difficile pour les enfants. Cependant, il existe de nombreuses façons de rendre l'apprentissage plus amusant et plus facile pour les enfants atteints de troubles d'apprentissage. Une façon est de traiter l'apprentissage comme un jeu. Les jeux peuvent aider les enfants à apprendre de nouvelles compétences et à s'amuser en…
Je veux évidemment avoir quelqu'un sur qui m'appuyer, mais je ne sais pas comment m'y prendre, à chaque fois que j'essaie, j'échoue, puis je perds courage et reviens au point initial.	Il est normal de vouloir avoir quelqu'un sur qui s'appuyer, et il est compréhensible que vous vous sentiez découragé lorsque vous n'y parvenez pas. Cependant, il est important de ne pas abandonner. Voici quelques conseils pour vous aider à trouver quelqu'un sur qui vous pouvez vous appuyer : * Soyez vous-même. Ne prétendez pas être quelqu'un que vous n'êtes pas, car cela ne fera que vous rendre p…
Je trouve que mon intérêt et mon enthousiasme pour les choses diminuent de plus en plus et je ne me sens jamais motivé à faire quoi que ce soit. Est-ce un problème de santé mentale ?	Il est possible que vous souffriez d'un problème de santé mentale, comme la dépression ou l'anxiété. Ces troubles peuvent entraîner une perte d'intérêt et de motivation, ainsi qu'une sensation de fatigue et de tristesse. Si vous pensez que vous pourriez souffrir d'un problème de santé mentale, il est important de consulter un professionnel de la santé mentale pour obtenir un diagnostic et un trai…
Une pression psychologique régulière peut affecter notre stabilité émotionnelle et notre santé physique. Nous devons entraîner notre résilience mentale et éduquer notre santé mentale	La pression psychologique régulière peut affecter notre stabilité émotionnelle et notre santé physique. Nous devons entraîner notre résilience mentale et éduquer notre santé mentale.
J'ai été illégalement détenu pendant une nuit, torturé jusqu'à écroulement, pleurant seul dans un coin, seules les larmes illuminaient l'obscurité	Je suis désolé d'apprendre que vous avez été illégalement détenu et torturé. C'est une expérience horrible et je ne peux qu'imaginer ce que vous avez dû traverser. Je suis là pour vous écouter si vous avez besoin de parler.
En termes de santé mentale des adolescents, il est très important d'apprendre à établir une relation saine et à exprimer correctement ses émotions et ses demandes.	En termes de santé mentale des adolescents, il est très important d'apprendre à établir une relation saine et à exprimer correctement ses émotions et ses demandes. Les adolescents sont souvent confrontés à des problèmes de santé mentale, tels que la dépression, l'anxiété et les troubles alimentaires. Ces problèmes peuvent être causés par un certain nombre de facteurs, notamment des facteurs génét…
Je fais beaucoup de cauchemars ces derniers temps, et ces rêves me font peur et me mettent mal à l'aise, et affectent même la qualité de mon sommeil et ma vie quotidienne.	Les cauchemars sont des rêves effrayants ou désagréables qui peuvent être très perturbateurs. Ils sont souvent causés par le stress, l'anxiété ou des événements traumatisants. Les cauchemars peuvent être très effrayants et peuvent vous faire sentir mal à l'aise, mais ils ne sont généralement pas dangereux. Si vous faites beaucoup de cauchemars, il y a quelques choses que vous pouvez faire pour es…
Je suis toujours anxieux et je m'inquiète constamment de la façon dont les choses se passent, en particulier des petites choses, cela peut aussi me mettre mal à l'aise et anxieux	Il existe de nombreuses façons de gérer l'anxiété et les inquiétudes. Voici quelques conseils : * Essayez d'identifier les choses qui vous rendent anxieux et évitez-les si possible. * Pratiquez des techniques de relaxation, comme la respiration profonde ou la méditation. * Faites de l'exercice régulièrement. * Mangez sainement et dormez suffisamment. * Parlez à un ami ou à un membre de votre fami…
Je ne peux pas arrêter mes pensées négatives, parfois même quand les choses ne vont pas si mal, je pense toujours au pire, je me sens tellement déprimé et impuissant, j'ai l'impression que je ne pourrai jamais me débarrasser de cette émotion.	Il est normal de se sentir déprimé et impuissant de temps en temps. Cependant, si vous vous sentez constamment déprimé et que vous avez du mal à contrôler vos pensées négatives, il est important de demander de l'aide. Un thérapeute peut vous aider à identifier les causes de vos pensées négatives et à développer des stratégies pour les gérer. Il existe également des choses que vous pouvez faire pa…
J'ai l'impression que ma vie est ennuyeuse et manque de passion et de motivation, ce qui me déprime et me désespère	Il est normal de se sentir déprimé et désespéré lorsque l'on a l'impression que sa vie est ennuyeuse et manque de passion et de motivation. Cependant, il existe des moyens de surmonter ces sentiments et de retrouver le goût de vivre. Voici quelques conseils : * Identifiez ce qui vous passionne. Qu'est-ce qui vous fait vibrer ? Qu'est-ce qui vous donne envie de vous lever le matin ? Une fois que v…
Je souffre souvent d'insomnie, je reste allongé dans mon lit la nuit en pensant au travail, aux tâches familiales et aux relations interpersonnelles, ce qui me rend incapable de me concentrer pendant la journée, réduit l'efficacité de mon travail et mon humeur devient très mauvaise.	Il existe de nombreuses causes possibles à l'insomnie, notamment le stress, l'anxiété, la dépression et les troubles du sommeil. Si vous souffrez d'insomnie chronique, il est important de consulter un médecin ou un spécialiste du sommeil pour déterminer la cause sous-jacente et obtenir un traitement approprié. Voici quelques conseils pour vous aider à mieux dormir la nuit : * Établissez une routi…
Quand je rencontre des revers et des déceptions, je pense que la seule façon d'être en sécurité est de tout oublier.	Il est normal de se sentir dépassé par les revers et les déceptions. Cependant, il est important de se rappeler que ces expériences font partie de la vie et qu'elles peuvent nous aider à grandir et à devenir plus forts. Plutôt que d'essayer d'oublier complètement ces expériences, nous pouvons essayer de les utiliser comme des opportunités d'apprentissage. Nous pouvons nous demander ce que nous po…
Je me sens souvent fatigué et faible, même lorsque je ne fais pas de travail physique, je souffre souvent d'insomnie et de difficultés à m'endormir, ce qui me rend très mal à l'aise et perturbé	Il existe de nombreuses raisons possibles pour lesquelles vous pourriez vous sentir fatigué et faible, même lorsque vous ne faites pas de travail physique. Voici quelques possibilités : * Vous ne dormez peut-être pas suffisamment. La plupart des adultes ont besoin de 7 à 8 heures de sommeil par nuit. Si vous ne dormez pas suffisamment, vous risquez de vous sentir fatigué et faible. * Vous ne mang…
Je souffre parfois de dépression, je ne peux pas manger normalement, puis je contrôle mon alimentation car j'ai peur que les gens me voient maigrir	Je comprends que vous souffrez de dépression et que vous avez du mal à manger normalement. Vous avez peur que les gens vous voient maigrir et vous contrôlez votre alimentation. Je peux vous aider à trouver des ressources pour vous aider à faire face à votre dépression et à vos troubles alimentaires.
Mes parents me critiquent toujours et peu importe ce que je fais n'est jamais assez bien, cela me déprime et me déçoit, j'ai l'impression que je ne pourrais jamais obtenir leur approbation et leurs éloges	Il est important de se rappeler que vos parents ne sont pas parfaits et qu'ils font de leur mieux avec les outils dont ils disposent. Ils peuvent ne pas avoir les compétences ou les connaissances nécessaires pour vous soutenir de la manière dont vous en avez besoin. Cela ne veut pas dire que vous ne valez rien ou que vous ne méritez pas d'être aimé et accepté. Vous pouvez essayer de parler à vos …
Mes relations amoureuses ont toujours été très instables, je suis toujours contrôlé par les émotions, incapable de maintenir ma relation de manière saine	Il est important de comprendre que les relations amoureuses sont complexes et qu'il n'y a pas de solution unique pour les maintenir saines. Cependant, il existe quelques conseils généraux qui peuvent vous aider à améliorer vos relations amoureuses. Tout d'abord, il est important d'être conscient de vos propres émotions et de la manière dont elles affectent vos relations. Lorsque vous êtes en colè…
Xiaoling a été victime d'intimidation à l'université, ce qui a fait qu'elle se sentait inférieure et déprimée. Comment puis-je l'aider à reconstruire sa confiance en elle et sa santé mentale ?	Il y a plusieurs choses que vous pouvez faire pour aider Xiaoling à reconstruire sa confiance en elle et sa santé mentale après avoir été victime d'intimidation à l'université. Voici quelques conseils : * Soyez là pour elle. Écoutez-la et offrez-lui votre soutien. Faites-lui savoir que vous croyez en elle et que vous êtes là pour elle, quoi qu'il arrive. * Aidez-la à comprendre qu'elle n'est pas …
Mes relations familiales étaient compliquées et j'étais souvent stressée et anxieuse et je ne savais pas comment les gérer ni vers qui me tourner pour obtenir de l'aide.	Il est important de parler de ses problèmes à quelqu'un en qui on a confiance, comme un ami, un membre de sa famille ou un professionnel de la santé mentale. Il existe également des groupes de soutien et des ressources en ligne qui peuvent vous aider à gérer votre stress et votre anxiété.
J'ai un ami qui se plaint toujours et n'a aucune attitude positive envers quoi que ce soit, je pense que sa négativité affecte mes émotions, mais je ne sais pas comment communiquer avec lui	Il est important de communiquer avec votre ami de manière honnête et directe. Faites-lui savoir que sa négativité vous affecte et que vous souhaitez qu'il fasse un effort pour être plus positif. Vous pouvez également lui suggérer de consulter un thérapeute ou un conseiller pour l'aider à gérer sa négativité.
Récemment, j'ai découvert que j'avais fréquemment des insomnies, même quand je m'endors, je fais des cauchemars et je me sens lourd à mon réveil, que dois-je faire ?	Voici quelques conseils pour vous aider à mieux dormir la nuit : * Établissez une routine de sommeil régulière et respectez-la autant que possible, même le week-end. * Créez un environnement de sommeil relaxant et sombre. * Évitez la caféine et l'alcool avant de vous coucher. * Faites de l'exercice régulièrement, mais pas trop près de l'heure du coucher. * Consultez un médecin si vous souffrez d'…
Parfois, lorsque je discute avec des amis, j'ai toujours l'impression que la conversation est terminée une fois que j'ai fini de parler, et je ne sais pas quoi dire ensuite.	Il existe plusieurs façons de relancer une conversation avec des amis. Voici quelques conseils : * Posez des questions ouvertes. Cela permettra à vos amis de s'exprimer davantage et de partager leurs pensées et leurs sentiments. * Écoutez attentivement ce que vos amis ont à dire. Cela vous permettra de mieux comprendre leur point de vue et de trouver des sujets de conversation communs. * Soyez po…
Mon enfant est victime d'intimidation à l'école et il est maintenant très renfermé et je ne sais pas comment l'aider	Il est important de parler à votre enfant de ce qu'il vit et de lui faire savoir que vous êtes là pour lui. Vous pouvez également lui suggérer de parler à un adulte de confiance, comme un enseignant ou un conseiller scolaire. Si l'intimidation persiste, vous pouvez envisager de prendre des mesures supplémentaires, comme signaler l'incident à l'école ou à la police.
Chaque fois que je communique avec les gens, je me sens toujours très nerveux, je ne sais pas quoi dire et j'ai peur de dire la mauvaise chose.	Il est normal de se sentir nerveux lorsque l'on communique avec les autres, surtout si l'on ne les connaît pas bien. Cependant, il existe des moyens de surmonter cette nervosité et de communiquer plus efficacement. Voici quelques conseils : * Préparez-vous à l'avance. Si vous savez que vous allez devoir parler à quelqu'un, prenez le temps de réfléchir à ce que vous voulez dire et à la façon dont …
Chaque fois que je suis seul, je commence à avoir un sentiment de peur inexplicable, je me sens contrôlé sans le savoir par une force invisible, comme si j'étais enfermé, piégé dans une coquille infranchissable. Parfois, tout devient extrêmement effrayant.	Vous n'êtes pas seul. Beaucoup de gens ressentent la même chose. Il est important de savoir que vous n'êtes pas seul et qu'il y a des gens qui peuvent vous aider. Si vous vous sentez dépassé, n'hésitez pas à demander de l'aide. Il existe de nombreuses ressources disponibles pour vous aider à traverser cette période difficile.
J'ai toujours été trop dur avec moi-même et j'ai l'impression de ne pas être assez bon pour être aimé et valorisé	Il est important de se rappeler que vous êtes digne d'amour et de valeur, quelle que soit votre apparence ou ce que vous faites. Vous êtes une personne unique et spéciale, et vous méritez d'être aimé et apprécié pour qui vous êtes. Ne soyez pas trop dur avec vous-même et essayez de vous accepter pour ce que vous êtes. Vous êtes parfait comme vous êtes.
Ma vie n'est qu'une constante frustration, j'échoue quoi que je fasse, j'ai l'impression de ne rien valoir	Je comprends que vous vous sentez frustré et que vous avez l'impression d'échouer. C'est un sentiment très difficile à vivre, et je veux vous assurer que vous n'êtes pas seul. Beaucoup de gens se sentent comme vous à un moment ou à un autre de leur vie. Il est important de se rappeler que l'échec n'est pas la fin du monde. C'est une partie normale de la vie, et tout le monde échoue à un moment ou…
J'ai toujours été victime d'intimidation, méprisée, je me sentais inutile et incompétente, incapable de montrer ma vraie force et mes capacités dans des situations sociales, me cachant toujours dans un coin	Il est important de se rappeler que vous n'êtes pas seul. Beaucoup de gens ont été victimes d'intimidation à un moment ou à un autre de leur vie. Il est important de parler à quelqu'un en qui vous avez confiance, comme un ami, un membre de votre famille ou un professionnel de la santé mentale. Ils peuvent vous aider à faire face à l'intimidation et à vous sentir mieux dans votre peau. Il est égal…
Je me sens confus et impuissant face à l'avenir, je ne sais pas ce que je dois faire et je ne sais pas ce que je veux.	Il est normal de se sentir confus et impuissant face à l'avenir. Le monde est un endroit complexe et incertain, et il peut être difficile de savoir quoi faire ou ce que l'on veut. Cependant, il y a des choses que vous pouvez faire pour vous aider à surmonter ces sentiments. Tout d'abord, essayez de vous concentrer sur le présent. Qu'est-ce que vous pouvez faire aujourd'hui pour vous rapprocher de…
Je ne sais pas pourquoi je pense toujours trop, je m'inquiète pour l'avenir et je dois vérifier plusieurs fois d'avoir bien verrouillé la porte et fermé les fenêtres chaque fois que je sors, ce qui me rend très fatiguée et irritable	Il est normal de s'inquiéter de l'avenir et de vouloir s'assurer que sa maison est bien fermée et sécurisée. Cependant, si ces inquiétudes vous empêchent de vivre votre vie normalement, il peut être utile de consulter un professionnel de la santé mentale. Un thérapeute peut vous aider à comprendre les causes de vos inquiétudes et à développer des stratégies pour les gérer.
J'ai été agressée sexuellement par le passé, mais je ressens toujours de la douleur et de la détresse, comment puis-je faire face à cette blessure passée ?	Il est important de se rappeler que vous n'êtes pas seule. De nombreuses personnes ont été victimes d'agressions sexuelles et ont du mal à faire face à la douleur et à la détresse qu'elles ont subies. Il existe de nombreuses ressources disponibles pour vous aider à faire face à votre blessure passée. Vous pouvez parler à un thérapeute, rejoindre un groupe de soutien ou lire des livres sur le suje…
Je sens que ma vie manque de sens et de but, que je ne peux pas trouver ce que je veux vraiment faire, et ce sentiment de perdition est très douloureux.	Il est normal de se sentir perdu et sans but à un moment donné de sa vie. C'est une expérience courante qui peut être très douloureuse. Cependant, il y a des choses que vous pouvez faire pour vous aider à trouver votre chemin. Tout d'abord, il est important de vous rappeler que vous n'êtes pas seul. Beaucoup de gens se sentent perdus et sans but à un moment donné de leur vie. C'est une expérience…
Un jour, j'ai trouvé un moyen de m'évader de mon monde réel, qui consiste à poser ma tête sur le canapé, à me boucher les oreilles et à ne pas écouter les sons extérieurs, afin de pouvoir m'immerger complètement dans un monde où je suis seul. Dans ce monde, tous les problèmes disparaissent.	Je comprends que vous ayez trouvé un moyen de vous évader de votre monde réel en vous isolant des sons extérieurs. Cela peut être un moyen efficace de se détendre et de se relaxer. Cependant, il est important de ne pas trop s'isoler et de rester connecté à la réalité. Il est également important de trouver des moyens sains de gérer le stress et les problèmes de la vie réelle.
Je me sens souvent seul et impuissant, j'ai l'impression de n'être compris ou soutenu par personne, même lorsqu'il y a des gens autour de moi, je me sens séparé et aliéné, cette émotion me rend très déprimé et négatif, et conduit parfois à des symptômes d'anxiété et de dépression	Il est important de se rappeler que vous n'êtes pas seul dans ce sentiment. Beaucoup de gens se sentent seuls et isolés, même lorsqu'ils sont entourés d'autres personnes. Il peut être utile de parler à un ami ou à un membre de votre famille de ce que vous ressentez. Ils peuvent être en mesure de vous offrir du soutien et des conseils. Il peut également être utile de consulter un thérapeute ou un …
Une phrase de ta part peut me briser le cœur	Je ne veux pas te briser le cœur.
Je suis extrêmement insatisfait(e) de mon apparence et de ma silhouette, j'éprouve souvent une faible estime de soi et de l'anxiété	Je comprends que vous vous sentez insatisfait de votre apparence et de votre silhouette. C'est un sentiment courant, et il est important de savoir que vous n'êtes pas seul. Il existe de nombreuses personnes qui se sentent de la même manière, et il y a de l'aide disponible. Si vous vous sentez déprimé ou anxieux, il est important de consulter un professionnel de la santé mentale. Un thérapeute peu…
Je ne sais absolument pas ce que je fais. Je n'ai jamais de direction dans quoi que ce soit que j’entreprends, ce qui me laisse très frustré.	Il est normal de se sentir perdu et sans direction de temps en temps. Tout le monde ressent cela à un moment ou à un autre. Mais si vous vous sentez constamment perdu et sans but, cela peut être un signe que vous avez besoin d'aide. Il existe de nombreuses ressources disponibles pour vous aider à trouver votre chemin, notamment des thérapeutes, des conseillers et des groupes de soutien. Si vous v…
Je fais face à de nombreuses angoisses sociales, je n'ose pas communiquer avec des inconnus et je n'aime pas être dans des endroits bondés, j'espère pouvoir surmonter ces peurs.	Il existe de nombreuses façons de surmonter les angoisses sociales. Voici quelques conseils : * Commencez par vous fixer de petits objectifs. Par exemple, vous pouvez vous fixer comme objectif de parler à une personne inconnue chaque jour. * Ne vous comparez pas aux autres. Tout le monde est différent et a ses propres forces et faiblesses. * Soyez patient. Il faut du temps pour surmonter les ango…
Les psychologues croient que la dépression extrême peut affecter la santé physique et mentale d'une personne	Les psychologues pensent que la dépression extrême peut affecter la santé physique et mentale d'une personne. La dépression extrême peut entraîner des problèmes de santé physique tels que des troubles du sommeil, des changements d'appétit, des douleurs et des problèmes digestifs. Elle peut également entraîner des problèmes de santé mentale tels que l'anxiété, l'irritabilité, la difficulté à se co…
Chaque fois que je commence à poursuivre un objectif, je me sens impuissant et chaque fois que j'essaie de changer quelque chose, j'ai l'impression de ne pas en avoir le courage	Il est normal de se sentir impuissant et de ne pas avoir le courage de changer les choses. Il est important de se rappeler que le changement prend du temps et des efforts. Il est important de se fixer des objectifs réalistes et de ne pas se décourager si les choses ne se passent pas comme prévu. Il est également important de demander de l'aide si nécessaire.
Je souffre souvent d'insomnie et de difficultés à me concentrer sur mon travail parce que j'ai peur de ne pas avoir les compétences pour faire mon travail	Il est important de se rappeler que vous avez été embauché pour un poste pour lequel vous êtes qualifié. Vous avez les compétences et les connaissances nécessaires pour faire votre travail. Si vous avez des doutes, n'hésitez pas à demander de l'aide à vos collègues ou à votre superviseur. Il est également important de prendre soin de soi. Assurez-vous de dormir suffisamment, de manger des aliment…
Je ressens plus de douleur que jamais quand ma famille rejette mon aide	Je comprends que vous vous sentiez blessé et rejeté par votre famille. C'est une expérience très douloureuse. Il est important de se rappeler que vous n'êtes pas seul et qu'il existe des personnes qui peuvent vous aider. Si vous souhaitez parler à quelqu'un, n'hésitez pas à me contacter. Je suis là pour vous écouter et vous soutenir.
Je me sens déprimé à chaque fois que je rencontre des difficultés	Il est normal de se sentir déprimé lorsque l'on rencontre des difficultés. Cependant, si vous vous sentez déprimé de façon persistante, il est important de consulter un professionnel de la santé mentale. Il pourra vous aider à comprendre les causes de votre dépression et vous proposer des traitements efficaces.
Je me sens souvent déprimé et impuissant, j'ai l'impression que ma vie manque de sens et de valeur, et je pense parfois au suicide, mais j'ai peur d'en parler à qui que ce soit, craignant qu'ils ne pensent que je suis une personne faible et un raté.	Il est important de parler à quelqu'un de ce que vous ressentez. Il existe de nombreuses ressources disponibles pour vous aider. Vous pouvez appeler le 15 ou le 3114, ou vous rendre sur le site web de Suicide Prevention Lifeline. Vous n'êtes pas seul et il y a des gens qui veulent vous aider.
J'ai un ami qui a toujours l'impression qu'il n'est pas assez bon, assez intelligent, assez talentueux ou même digne d'attention, ce qui me fait m'inquiéter pour sa santé mentale.	Il est important de rappeler à votre ami qu'il est digne d'attention et d'amour, et qu'il n'a pas besoin d'être parfait pour être apprécié. Vous pouvez également lui suggérer de consulter un professionnel de la santé mentale pour l'aider à surmonter ses sentiments d'insuffisance.
Je me sens souvent déprimé et désespéré à cause de la pression du travail et des conflits familiaux, comment puis-je soulager cette émotion et maintenir ma santé mentale ?	Il est important de prendre soin de sa santé mentale, et il existe de nombreuses façons de le faire. Voici quelques conseils pour vous aider à soulager votre dépression et votre désespoir : * Parlez à un ami ou à un membre de votre famille de ce que vous ressentez. Parfois, le simple fait de parler de ses problèmes peut aider à les soulager. * Faites de l'exercice régulièrement. L'exercice physiq…
Dernièrement, mon esprit a commencé à s'embrouiller et j'ai commencé à m'inquiéter pour ma santé mentale et ça me fait peur	Il est important de prendre soin de sa santé mentale, tout comme on prend soin de sa santé physique. Si vous vous inquiétez pour votre santé mentale, il est important d'en parler à un professionnel de la santé mentale, comme un psychologue ou un psychiatre. Ils peuvent vous aider à comprendre ce que vous vivez et vous donner des conseils et des outils pour vous aider à vous sentir mieux.
Je n'ose pas confronter les autres, j'ai toujours l'impression que je ne suis pas assez bon, je suis nerveux, même si mes amis me parlent, je continue à m'inquiéter de ce qu'ils pensent	Il est normal de se sentir nerveux ou anxieux lorsque l'on confronte les autres. Cependant, il est important de se rappeler que vous avez le droit d'exprimer votre opinion et que vous n'avez pas à avoir peur de ce que les autres pensent. Si vous ne vous sentez pas à l'aise de confronter quelqu'un en personne, vous pouvez toujours lui écrire une lettre ou un courriel. Il est également important de…
Je crains de ne pas pouvoir maintenir ma santé mentale et de laisser tomber ma famille	Je comprends que vous vous inquiétiez pour votre santé mentale et que vous ne vouliez pas laisser tomber votre famille. C'est une situation difficile, mais il y a de l'aide disponible. Vous pouvez parler à votre médecin ou à un autre professionnel de la santé mentale pour obtenir de l'aide. Il existe également des groupes de soutien et des ressources en ligne qui peuvent vous aider. N'hésitez pas…
Je me sens souvent seul et impuissant, même quand je suis entouré de gens, j'ai l'impression que personne ne comprend mon monde intérieur	Il est normal de se sentir seul et impuissant de temps en temps, surtout dans un monde qui peut sembler chaotique et imprévisible. Cependant, si vous vous sentez constamment seul et impuissant, cela peut être le signe d'un problème plus profond, comme la dépression ou l'anxiété. Si vous pensez que c'est le cas, il est important de demander l'aide d'un professionnel de la santé mentale. Il existe …
Je me sens très confus à propos de l'avenir, je ne sais pas quoi faire, cette confusion me rend très anxieux et mal à l'aise	Il est normal de se sentir confus et anxieux face à l'avenir. Personne ne sait exactement ce que l'avenir nous réserve, et cela peut être effrayant. Cependant, il y a des choses que vous pouvez faire pour gérer votre anxiété et vous sentir plus en contrôle de votre vie. Tout d'abord, essayez de vous concentrer sur le présent. Qu'est-ce que vous pouvez faire aujourd'hui pour vous rapprocher de vos…
Je suis allé à une fête aujourd'hui, mais tout le monde s'est moqué de moi et j'ai été rejeté par les autres. J'étais vraiment sur le point de m'effondrer mentalement.	Je suis désolé d'apprendre que vous avez vécu une expérience aussi difficile. Il est important de se rappeler que vous n'êtes pas seul et que d'autres personnes ont vécu des expériences similaires. Il est également important de se rappeler que vous êtes une personne forte et capable, et que vous pouvez surmonter ce défi. Si vous vous sentez dépassé, il existe des ressources disponibles pour vous …
Je trouve mes relations interpersonnelles difficiles et il m'est toujours difficile de créer des liens profonds avec les gens. J'ai l'impression de ne pas savoir comment m'entendre avec les gens ou comment communiquer avec eux, alors je suis facilement isolée. J'ai envie d'avoir de vrais amis, mais je ne sais pas comment m'en faire.	Il existe de nombreuses raisons pour lesquelles vous pourriez avoir du mal à créer des liens profonds avec les gens. Il est possible que vous ayez vécu des expériences négatives dans le passé qui vous ont rendu méfiant ou hésitant à vous ouvrir aux autres. Vous pouvez également avoir des difficultés à communiquer vos pensées et vos sentiments, ce qui peut rendre difficile la création de liens ave…
Mon travail est soumis à une forte pression, je dois faire des heures supplémentaires tous les jours et je me couche souvent tard. J'ai l'impression que mon corps et mon esprit ont atteint leurs limites, mais je ne peux toujours pas m'arrêter. Que dois-je faire pour éviter une crise.	Il est important de prendre soin de soi et de s'assurer que l'on ne se surmène pas. Voici quelques conseils pour éviter une crise : * **Prenez des pauses régulières.** Levez-vous et bougez, ou sortez prendre l'air, toutes les 20 à 30 minutes. Cela vous aidera à rester concentré et motivé, et à éviter de vous sentir dépassé. * **Fixez des limites.** Ne vous sentez pas obligé de dire oui à tout. Ap…
Je sens que je ne peux pas contrôler mes émotions et je perds souvent mon sang-froid à cause de petites choses, ce qui rend les gens autour de moi mal à l'aise	Il est important de pouvoir contrôler ses émotions, car cela peut avoir un impact négatif sur nos relations avec les autres et sur notre bien-être général. Il existe de nombreuses techniques qui peuvent vous aider à contrôler vos émotions, telles que la respiration profonde, la méditation et la pleine conscience. Vous pouvez également demander l'aide d'un thérapeute ou d'un conseiller si vous ave…
Il n'y avait pas d'amour dans ma famille, pas de parole chaleureuse, pas de véritable sentiment de sécurité, je ne recevais que des reproches et subissais des pressions, alors je suis devenu plus introverti et je ne voulais interagir avec personne.	Il semble que vous ayez vécu une enfance difficile, marquée par le manque d'amour et de soutien de la part de votre famille. Cela a pu avoir un impact négatif sur votre développement émotionnel et social, vous rendant plus introverti et moins enclin à interagir avec les autres. Il est important de se rappeler que vous n'êtes pas seul et que de nombreuses personnes ont vécu des expériences similai…
Je m'inquiète pour mon avenir, je ne sais pas si j'aurai du succès, si je pourrai réaliser mes rêves	Ne vous inquiétez pas, vous avez tout le potentiel pour réussir. Vous êtes intelligent, créatif et travailleur. Si vous continuez à travailler dur et à croire en vous, vous pouvez réaliser tout ce que vous vous proposez.
J'ai l'impression de ne pas pouvoir gérer le stress et les défis de ma vie, et je souffre souvent de mauvaise humeur, d'anxiété et d'insomnie.	Il existe de nombreuses façons de gérer le stress et les défis de la vie. Voici quelques conseils : * **Prenez soin de vous.** Assurez-vous de dormir suffisamment, de manger des aliments sains et de faire de l'exercice régulièrement. Ces choses peuvent vous aider à vous sentir mieux physiquement et mentalement, ce qui vous permettra de mieux gérer le stress. * **Apprenez à gérer votre temps.** Es…
Je me sens seul, j'ai beaucoup de gens autour de moi mais je n'ai pas toujours l'impression de pouvoir vraiment me lier avec eux, est-ce un trouble relationnel ?	Il est possible que vous souffriez d'un trouble relationnel, mais il est difficile de le dire avec certitude sans plus d'informations. Les troubles relationnels sont des schémas de comportement qui rendent difficile la formation et le maintien de relations saines. Ces schémas peuvent être le résultat d'expériences négatives dans l'enfance, telles que la négligence ou les abus. Si vous pensez que …
Je me sens très mal à l'aise face à l'avenir, je ne sais pas quoi faire et je ne sais pas ce que l'avenir me réserve	Il est normal de se sentir anxieux face à l'avenir. Personne ne sait ce que l'avenir nous réserve, et c'est normal d'avoir peur de l'inconnu. Cependant, il est important de se rappeler que l'avenir est plein de possibilités, et que nous avons le pouvoir de le façonner. Nous pouvons prendre des décisions qui nous mèneront vers un avenir meilleur, et nous pouvons travailler pour atteindre nos objec…
J'ai beaucoup de problèmes dans mon mariage et je me sens déprimé et impuissant et je ne sais pas quoi faire	Je comprends que vous vous sentez déprimé et impuissant face aux problèmes de votre mariage. C'est une situation difficile, et il est normal de se sentir dépassé. Il existe des ressources disponibles pour vous aider à traverser cette période difficile. Vous pouvez parler à un thérapeute ou à un conseiller matrimonial, ou vous pouvez rejoindre un groupe de soutien pour les personnes mariées. Il ex…
Je me sens souvent très fatigué, physiquement et mentalement faible, et parfois même j'ai des pensées suicidaires, ayant l'impression que ma vie n'a pas de sens	Je comprends que vous vous sentez très fatigué, physiquement et mentalement faible, et que vous avez parfois des pensées suicidaires. Je veux vous assurer que vous n'êtes pas seul et qu'il y a de l'aide disponible. Si vous avez des pensées suicidaires, il est important de demander de l'aide immédiatement. Vous pouvez appeler le 15 ou le 112, ou vous rendre aux urgences les plus proches. Il existe…
Il m'arrive parfois de ressentir soudainement des sensations de peur et de panique extrêmes, et il m'est difficile de contrôler mes émotions et mon comportement, cet état peut durer pendant une période prolongée.	Il est important de consulter un professionnel de la santé mentale si vous ressentez des symptômes de peur et de panique extrêmes. Un professionnel de la santé mentale peut vous aider à comprendre les causes de vos symptômes et vous proposer des stratégies pour les gérer.
Chaque fois que je fais face à un nouveau défi, je me sens tellement nerveux et peu sûr de moi que j'ai l'impression de ne pas pouvoir le gérer	Il est normal de se sentir nerveux et peu sûr de soi lorsque l'on est confronté à un nouveau défi. Cela signifie que vous vous souciez du résultat et que vous voulez bien faire. Cependant, il est important de ne pas laisser ces sentiments vous empêcher de relever le défi. Voici quelques conseils pour gérer votre nervosité et votre manque de confiance en vous : * Préparez-vous. Plus vous êtes prép…
J'ai parfois l'impression soudaine de ne plus avoir de passe-temps, de ne m'intéresser à rien et d'avoir perdu ma direction et ma motivation	Il est normal de se sentir perdu et sans but de temps en temps. Cela peut être dû à un certain nombre de facteurs, tels que le stress, l'anxiété ou la dépression. Si vous vous sentez perdu et sans but depuis un certain temps, il peut être utile de parler à un thérapeute ou à un conseiller. Ils peuvent vous aider à identifier les causes de vos sentiments et à élaborer des stratégies pour les surmo…
De temps en temps, une émotion incontrôlable me vient au cœur, je me demande ce que je devrais faire si je souffre de dépression	Il est important de demander de l'aide si vous pensez souffrir de dépression. Il existe de nombreuses ressources disponibles pour vous aider à traverser cette période difficile. Vous pouvez parler à votre médecin, à un thérapeute ou à un autre professionnel de la santé mentale. Il existe également de nombreux groupes de soutien et de ressources en ligne qui peuvent vous aider. N'oubliez pas que v…
J'ai toujours ressenti un malaise physique et j'ai toutes sortes de symptômes étranges, mais les médecins disent que je suis en bonne santé, ce qui me rend très anxieux et impuissant.	Il est important de prendre soin de sa santé physique et mentale. Si vous ressentez un malaise physique, il est important de consulter un médecin pour écarter toute cause médicale sous-jacente. Si vous vous sentez anxieux ou impuissant, il peut être utile de parler à un thérapeute ou à un conseiller. Il existe de nombreuses ressources disponibles pour vous aider à prendre soin de votre santé phys…
Du fait d'une exposition prolongée à un environnement stressant, Huang Xiaoming a des insomnies fréquentes, ne différencie plus le jour de la nuit et a complètement perdu son rythme de vie	Huang Xiaoming souffre d'insomnie chronique, ce qui signifie qu'il a du mal à s'endormir ou à rester endormi. Cela peut être dû à un certain nombre de facteurs, notamment le stress, l'anxiété et la dépression. L'insomnie peut avoir un impact négatif sur la santé physique et mentale d'une personne, et peut entraîner des problèmes de concentration, de mémoire et d'humeur. Il existe un certain nombr…
Ma relation avec mes amis n'a jamais été excellente, j'ai l'impression d'avoir du mal à me faire de vrais amis et cela me fait me sentir très seul	Il peut être difficile de se faire des amis, surtout à l'âge adulte. Mais il y a des choses que vous pouvez faire pour améliorer vos chances de vous faire des amis. Voici quelques conseils : * Soyez vous-même. Ne prétendez pas être quelqu'un que vous n'êtes pas. Les gens seront plus susceptibles de vouloir être amis avec vous s'ils savent qui vous êtes vraiment. * Soyez intéressé par les autres. …
Les gens autour de moi pensent toujours que je suis trop nerveux et que je m'inquiète pour de petites choses, comment puis-je me détendre ?	Il existe de nombreuses façons de se détendre. Voici quelques conseils : * **Faites de l'exercice régulièrement.** L'exercice physique est un excellent moyen de réduire le stress et l'anxiété. Essayez de faire au moins 30 minutes d'exercice modéré la plupart des jours de la semaine. * **Mangez sainement.** Une alimentation saine peut contribuer à améliorer votre humeur et votre niveau d'énergie. …
Mes insomnies m'obligent à voir un psychiatre tous les soirs	Vous devriez consulter un médecin ou un psychiatre pour obtenir un diagnostic et un traitement appropriés.
Je sens que je ne suis pas capable de faire face à la pression familiale et celle de la société, et je ne peux pas accomplir beaucoup de choses	Il est normal de se sentir dépassé par la pression familiale et sociétale. Il est important de se rappeler que vous n'êtes pas seul et qu'il existe des ressources pour vous aider à faire face à ces pressions. Voici quelques conseils pour gérer la pression familiale et sociétale : * Parlez à vos proches de ce que vous ressentez. Ils peuvent vous offrir du soutien et des conseils. * Fixez-vous des …
J'ai l'impression que mes relations se détériorent, ni ma famille ni mes amis ne me font confiance ou ne me soutiennent, cela me fait me sentir tellement perdu et désespéré.	Il est normal de se sentir perdu et désespéré lorsque l'on a l'impression que ses relations se détériorent. Il est important de se rappeler que vous n'êtes pas seul et qu'il existe des personnes qui peuvent vous aider. Il peut être utile de parler à un ami ou à un membre de votre famille en qui vous avez confiance, ou de demander l'aide d'un professionnel de la santé mentale. Il existe également …
Je me sens souvent incapable de contrôler mes émotions et mon comportement et j'agis souvent de manière impulsive ou violente.	Il est important de demander de l'aide si vous vous sentez souvent incapable de contrôler vos émotions et votre comportement et si vous agissez souvent de manière impulsive ou violente. Un professionnel de la santé mentale peut vous aider à comprendre les causes de votre comportement et à développer des stratégies pour le gérer. Il existe également des groupes de soutien disponibles pour les pers…
J'ai souvent peur d'être rejeté, donc je dis rarement ce que je pense	Il est normal d'avoir peur du rejet, mais il est important de ne pas laisser cette peur vous empêcher de vous exprimer. Si vous ne dites jamais ce que vous pensez, vous risquez de passer à côté d'opportunités importantes. Essayez de vous rappeler que tout le monde a peur du rejet à un moment ou à un autre, et que ce n'est pas une raison pour se taire. Si vous avez quelque chose à dire, dites-le !…
La dépression a commencé à se développer progressivement pendant l'adolescence	La dépression est un trouble mental grave qui peut affecter les personnes de tous âges. Elle se caractérise par une tristesse persistante et intense, une perte d'intérêt pour les activités qui étaient autrefois agréables, des changements dans l'appétit et le sommeil, et des sentiments de culpabilité, de dévalorisation et de désespoir. La dépression peut être traitée avec des médicaments et une ps…
Je me sens insatisfait de mon apparence et de mon corps, je me sens loin d'être parfait et je me sens souvent anxieux et peu sûr de moi	Il est normal de se sentir insatisfait de son apparence et de son corps à un moment ou à un autre. Tout le monde a des défauts physiques, et il est important de se rappeler que la perfection n'existe pas. Il est également important de se rappeler que l'apparence physique n'est pas le plus important dans la vie. Il y a beaucoup d'autres choses qui comptent, comme la personnalité, l'intelligence et…
J'ai toujours peur de ne pas assez bien faire, même si les autres me félicitent, je n'arrive pas abandonner mes inquiétudes	Il est normal d'avoir peur de ne pas être assez bien, surtout si vous êtes perfectionniste. Cependant, il est important de se rappeler que personne n'est parfait et que tout le monde fait des erreurs. Si vous vous concentrez sur vos erreurs, vous ne pourrez jamais apprécier vos réussites. Essayez plutôt de vous concentrer sur vos points forts et sur ce que vous avez accompli. N'oubliez pas que vo…
Je trouve que j'ai de plus en plus de mal à me concentrer, que ce soit en lisant ou en faisant autre chose, je suis facilement distrait	Il existe de nombreuses raisons pour lesquelles vous pouvez avoir du mal à vous concentrer. Voici quelques conseils pour vous aider à améliorer votre concentration : * Éliminez les distractions. Cela signifie éteindre votre téléphone, fermer les onglets inutiles sur votre ordinateur et trouver un endroit calme pour travailler. * Fixez-vous des objectifs. Lorsque vous savez ce que vous devez accom…
J'ai toujours l'impression de n'avoir aucune valeur, je ne sais pas quel est le sens de mon existence, et je me sens chaque jour vide et impuissant.	Je comprends que vous vous sentez déprimé et que vous avez l'impression de ne pas avoir de valeur. C'est un sentiment très courant, et il est important de savoir que vous n'êtes pas seul. Il y a de nombreuses personnes qui se sentent de la même manière, et il y a de l'aide disponible. Si vous vous sentez déprimé, il est important de consulter un professionnel de la santé mentale. Un thérapeute pe…
Je suis terrifiée à l'idée d'interagir avec les gens, j'ai peur d'être rejetée, ridiculisée ou incomprise, et je me sens souvent seule et impuissante.	Je comprends que vous ayez peur d'interagir avec les gens. C'est une peur courante, et il y a de nombreuses raisons pour lesquelles les gens peuvent la ressentir. Certaines personnes ont été blessées dans le passé, et elles ont peur d'être blessées à nouveau. D'autres personnes ont peur d'être rejetées ou ridiculisées. Et encore d'autres personnes ont peur d'être incomprises. Quelle que soit la r…
Je suis très insatisfaite de mon apparence et de ma silhouette, je me sens laide et peu attirante. J'ai souvent pensé à faire une chirurgie plastique et à perdre du poids, mais je suis également inquiète des risques de la chirurgie et j'ai peur d'être ridiculisée et rejetée par les autres.	Je comprends que vous soyez insatisfaite de votre apparence et de votre silhouette. C'est un sentiment très courant, et il est important de savoir que vous n'êtes pas seule. Il existe de nombreuses personnes qui se sentent de la même manière, et il existe de nombreuses ressources disponibles pour vous aider à vous sentir mieux dans votre peau. Si vous envisagez de subir une chirurgie plastique, i…
Je me couche souvent tard et je fais des heures supplémentaires pour le travail, ce qui aggrave de plus en plus ma condition physique, mais je ne peux pas m'arrêter, car je sens que ce n'est qu'ainsi que je pourrai prouver ma valeur et mes capacités	Il est important de trouver un équilibre entre le travail et la vie personnelle. Il est important de se reposer suffisamment et de faire de l'exercice régulièrement. Si vous ne vous sentez pas bien, vous devriez consulter un médecin.
Je me sens devenir de plus en plus accro aux jeux et aux réseaux sociaux, comme si ces choses étaient devenues partie intégrante de ma vie, cette dépendance me fait me donne l'impression d'être incapable de m'en sortir et de perdre mon identité, j'espère trouver un moyen de me débarrasser de cette dépendance.	Il est important de reconnaître que vous n'êtes pas seul dans cette situation. De nombreuses personnes luttent contre la dépendance aux jeux et aux médias sociaux. Il existe de nombreuses ressources disponibles pour vous aider à surmonter cette dépendance. Vous pouvez parler à votre médecin ou à un autre professionnel de la santé mentale, ou vous pouvez trouver des groupes de soutien en ligne ou …
Cela me dérange que mon humeur soit toujours changeante, parfois je suis très heureuse, et d'autres fois je suis tellement déprimée que j'ai même envie de me suicider.	Il est normal que votre humeur change de temps en temps. Tout le monde ressent des hauts et des bas émotionnels. Cependant, si vos sautes d'humeur sont extrêmes ou si elles interfèrent avec votre vie quotidienne, vous devriez consulter un professionnel de la santé mentale. Il pourra vous aider à comprendre les causes de vos sautes d'humeur et à trouver des moyens de les gérer.
Parfois j'ai l'impression que personne ne se soucie de moi et je suis le seul sur qui je peux vraiment compter	Il est normal de se sentir seul et isolé de temps en temps. Cependant, si vous vous sentez constamment seul et que vous avez l'impression que personne ne se soucie de vous, il est important de demander de l'aide. Il existe de nombreuses ressources disponibles pour vous aider à traverser cette période difficile. Vous pouvez parler à un ami ou à un membre de votre famille, ou vous pouvez demander l…
Récemment, je souffre souvent d'insomnie et je me tourne et me retourne sans cesse dans mon lit la nuit. Est-ce que cela pourrait être un problème psychologique sous-jacent ?	L'insomnie peut être causée par un certain nombre de facteurs, notamment le stress, l'anxiété, la dépression et d'autres problèmes de santé mentale. Si vous souffrez d'insomnie chronique, il est important de consulter un médecin ou un professionnel de la santé mentale pour déterminer la cause sous-jacente et obtenir un traitement approprié.
Ma relation avec ma famille n'a jamais été bonne, j'ai l'impression qu'ils ne me comprennent pas, ne me respectent pas, ça me fait me sentir seul	Il est important de se sentir compris et respecté par sa famille. Si vous ne vous sentez pas ainsi, cela peut être très douloureux. Il est possible que votre famille ne vous comprenne pas ou ne vous respecte pas pour diverses raisons. Peut-être ont-ils des attentes différentes de vous, ou peut-être ne sont-ils pas capables de vous exprimer leur amour et leur soutien de manière efficace. Quelle qu…
Je me sens souvent vide et seul à l'intérieur, cherchant quelque chose pour combler le vide, mais souvent je ne trouve pas le bon moyen de soulager ce sentiment	Il est normal de se sentir vide et seul de temps en temps. Tout le monde ressent cela à un moment ou à un autre. Cependant, si vous vous sentez constamment vide et seul, cela peut être le signe d'un problème plus grave, comme la dépression ou l'anxiété. Si vous pensez que vous souffrez de dépression ou d'anxiété, il est important de consulter un professionnel de la santé mentale. Il existe un cer…
