# Supplementary material
Source: ML conference proceedings conference paper supplement (https://openreview.net/forum?id=JL42j1BL5h)
Supplement: supplementary_material [file Mental_Health_pa.xlsx]

## Sheet: Sheet1
Input	Output
غالبًا ما أشعر بالوحدة والعجز ، لا أحد يستطيع أن يفهمني ، حتى أنني أشعر بأنني خاسر ، بدون أي قيمة أو معنى ، هذا الشعور يجعلني مكتئبًا جدًا ويائسًا ، ولا أعرف كيف أتخلص منه.	أشعر بالأسف لسماع أنك تشعر بهذه الطريقة. يبدو أنك تمر بوقت عصيب حقًا. من المهم أن تتذكر أنك لست وحدك. هناك الكثير من الناس الذين يشعرون بنفس الطريقة التي تشعر بها. من المهم أيضًا أن تتذكر أنك لست خاسرًا. أنت شخص قيم ولديك الكثير لتقدمه للعالم. قد يكون من المفيد التحدث إلى معالج أو مستشار حول ما تمر به. يمكنهم مساعدتك في فهم مشاعرك بشكل أفضل وتطوير آليات التأقلم. من المهم أيضًا أن تعتني بنفسك جسدي…
حتى لو كنت سأشتري كيسًا من رقائق البطاطس ، أخشى أن يعتقد الناس أنني ممرت بالكثير من السلوك المهزوم للذات	لا تخفِ من شراء كيس من رقائق البطاطس. لا بأس في الاستمتاع بالأشياء التي تحبها، حتى لو كانت غير صحية. لا تدع خوفك من الحكم يمنعك من الاستمتاع بالحياة.
دائمًا أشعر بالتعب والعجز، وغير قادر على التركيز على مهامي أو حتى العمل على الأشياء التي كنت مهتمًا بها، مما جعلني محبطًا للغاية.	أشعر بالأسف لسماع أنك تشعر بالتعب والعجز. يمكن أن يكون هذا شعورًا محبطًا للغاية. هناك عدد من الأشياء التي يمكن أن تسبب هذه المشاعر، بما في ذلك الإجهاد والقلق والاكتئاب. إذا كنت قلقًا بشأن صحتك العقلية، فمن المهم التحدث إلى أخصائي الصحة العقلية. يمكنهم مساعدتك في تحديد سبب مشاعرك وتزويدك باستراتيجيات للتغلب عليها. في غضون ذلك، إليك بعض الأشياء التي يمكنك القيام بها للمساعدة في تحسين مزاجك وطاقتك: …
في الآونة الأخيرة، لا أستطيع النوم جيدًا، أو أعاني من كوابيس عندما أنام، وأشعر بالتعب الشديد عندما أستيقظ في جميع جسدي.	هل لاحظت أي تغييرات أخرى في صحتك أو نمط حياتك؟
في كل مرة أذهب إلى الطبيب لا يوجد تحسن، ويزداد مزاجي سوءًا وغالبًا ما أشعر بالشفقة على نفسي وحالي	أفهم أنك تشعر بالإحباط من عدم تحسن حالتك الصحية بعد زيارة الطبيب. قد يكون من المفيد التحدث إلى طبيبك حول خيارات العلاج الأخرى المتاحة لك، أو الحصول على رأي ثانٍ من طبيب آخر. من المهم أيضًا أن تعتني بنفسك جسديًا وعقليًا قدر الإمكان. تأكد من الحصول على قسط كافٍ من النوم، وتناول نظامًا غذائيًا صحيًا، وممارسة التمارين الرياضية بانتظام. قد يكون من المفيد أيضًا التحدث إلى معالج أو مستشار حول كيفية التع…
لطالما شعرت بالعزلة والاستبعاد ، حتى وسط الزحام.	أشعر أنك وحيد ومعزول ، حتى عندما تكون محاطًا بالناس. هذا شعور شائع ، وأنت لست وحدك في الشعور به. هناك العديد من الأسباب التي قد تجعلك تشعر بالعزلة ، بما في ذلك: * الشعور بأنك مختلف عن الآخرين * عدم وجود أصدقاء أو عائلة مقربين * التعرض للتنمر أو المضايقة * الشعور بأنك لا تنتمي إلى أي مكان * التعامل مع مشاكل الصحة العقلية ، مثل الاكتئاب أو القلق إذا كنت تشعر بالعزلة ، فمن المهم أن تتحدث إلى شخص تثق…
جعل النفس مدمنة على الألعاب، أو الإنترنت هو ضغط نفسي غير مرئي	جعل النفس مدمنة على الألعاب، أو الإنترنت هو ضغط نفسي غير مرئي. الإدمان على الألعاب أو الإنترنت هو مشكلة خطيرة يمكن أن تؤدي إلى مجموعة متنوعة من المشاكل النفسية والاجتماعية. يمكن أن يؤدي الإدمان إلى مشاكل في العمل أو المدرسة، ويمكن أن يؤدي إلى مشاكل في العلاقات، ويمكن أن يؤدي إلى الاكتئاب والقلق. هناك عدد من العوامل التي يمكن أن تساهم في الإدمان على الألعاب أو الإنترنت، بما في ذلك العوامل الوراثية…
لقد تعرضت لضغط شديد مؤخرًا ، وأشعر بقلق شديد كل يوم ، ولا أنام جيدًا ، وأعاني من صداع ، وقلبي ينبض بسرعة ، وأشعر أنني سأنهار في أي وقت	يبدو أنك تمر بوقت عصيب. من المهم أن تعتني بنفسك جسديًا وعقليًا. إليك بعض النصائح لمساعدتك على التأقلم مع التوتر: * احصل على قسط كافٍ من النوم. عندما تكون متعبًا ، يكون جسمك وعقلك أكثر عرضة للتوتر. حاول أن تنام لمدة 7-8 ساعات كل ليلة. * تناول نظامًا غذائيًا صحيًا. يمكن أن يساعدك تناول الأطعمة الصحية على الشعور بالتحسن وتحسين مستويات الطاقة لديك. تجنب الأطعمة المصنعة والمشروبات السكرية والكحول. * م…
في كل مرة أواجه فيها صعوبات ونكسات ، أفقد دائمًا الثقة والتحفيز وأشعر أنني لا أستطيع التعامل معها	أفهم أنك تواجه صعوبات ونكسات، وهذا يمكن أن يكون محبطًا للغاية. ومع ذلك، من المهم أن تتذكر أن الجميع يواجه تحديات في حياتهم، وأن الطريقة التي نتعامل بها مع هذه التحديات هي التي تحدد نجاحنا. عندما تواجه صعوبة، خذ بعض الوقت للتفكير فيما حدث ولماذا حدث. ما الذي يمكنك تعلمه من هذا الموقف؟ كيف يمكنك تحسين أدائك في المرة القادمة؟ بمجرد أن تفهم الموقف بشكل أفضل، يمكنك البدء في وضع خطة للتغلب عليه. من الم…
أشعر دائمًا بالقلق من أن ما أفعله ليس جيدًا بما فيه الكفاية، وأشعر كما لو كنت محط أنظار الآخرين، وهذا يجعلني أشعر بالاكتئاب	أشعر بالأسف لسماع أنك تشعر بهذه الطريقة. القلق بشأن ما يعتقده الآخرون عنك هو أمر طبيعي، لكنه يمكن أن يصبح مشكلة عندما يبدأ في التدخل في حياتك. من المهم أن تتذكر أنك لست وحدك في هذا، وأن هناك أشخاصًا يمكنهم مساعدتك. إذا كنت تشعر بالاكتئاب، فإنني أوصي بالتحدث إلى معالج أو مستشار. يمكنهم مساعدتك في فهم مشاعرك وتطوير آليات التأقلم. تذكر أنك لست وحدك، وأن هناك أشخاصًا يهتمون بك ويريدون مساعدتك.
أشعر دائمًا بالقلق بشأن ما إذا كنت أفعل كل شيء بشكل صحيح، والخوف مما قد يفكر فيه الآخرون أو ينتقدونني، وغالبًا أغرق في شك مؤلم في نفسي نتيجة لذلك.	يبدو أنك تعاني من القلق الاجتماعي، وهو الخوف الشديد من الحكم عليك أو رفضك أو إحراجك من قبل الآخرين. يمكن أن يكون القلق الاجتماعي مزعجًا للغاية ويمكن أن يتداخل مع حياتك اليومية. ومع ذلك، هناك العديد من الأشياء التي يمكنك القيام بها للتغلب على القلق الاجتماعي، بما في ذلك العلاج والأدوية وتقنيات المساعدة الذاتية. إليك بعض النصائح لمساعدتك على التغلب على القلق الاجتماعي: * تحدث إلى معالج: يمكن للمعال…
أحافظ على أفكاري في قلبي ، وأشعر دائمًا أنني سوف أنفجر ، ولا يمكنني الاختباء من أنظار الآخرين	أفهم أنك تشعر بالضيق والإحباط. من المهم أن تجد طريقة للتعبير عن مشاعرك بطريقة صحية. يمكنك التحدث إلى صديق أو أحد أفراد العائلة أو معالج. يمكنك أيضًا كتابة أفكارك ومشاعرك في مجلة. من المهم أن تجد طريقة للتعبير عن نفسك حتى لا تشعر بأنك مكبوت.
تعرضت عائلتي لحادث مفاجئ ، وأصيب والداي بجروح خطيرة ، مما جعلني أشعر بالعجز والاكتئاب ، وحتى ظهرت لدي أعراض الاكتئاب.	أنا آسف لسماع ذلك. يبدو أنك تمر بوقت عصيب حقًا. من الطبيعي أن تشعر بالعجز والاكتئاب بعد تعرضك لمثل هذا الحدث الصادم. من المهم أن تتذكر أنك لست وحدك وأن هناك أشخاصًا يهتمون بك ويريدون مساعدتك. إذا كنت تشعر بالاكتئاب ، فمن المهم التحدث إلى شخص تثق به ، مثل صديق أو أحد أفراد العائلة أو معالج. يمكنهم تقديم الدعم والاستماع إليك ومعالجة مشاعرك. هناك أيضًا العديد من الموارد المتاحة لمساعدتك على التعامل …
وجدت نفسي أقل نشاطًا اجتماعيًا ، وأفضل دائمًا أن أكون وحيدًا	يبدو أنك تشعر بالوحدة والعزلة. هذا شعور شائع ، خاصة في عالم اليوم سريع الخطى. من المهم أن تتذكر أنك لست وحدك وأن هناك أشخاصًا يهتمون بك. إذا كنت ترغب في التحدث إلى شخص ما ، فهناك العديد من الموارد المتاحة لك. يمكنك التحدث إلى صديق أو أحد أفراد العائلة ، أو يمكنك الاتصال بخط المساعدة أو الانضمام إلى مجموعة دعم. تذكر أنك لست وحدك وأن هناك أشخاصًا يريدون مساعدتك.
لدي رغبة جامحة في السيطرة وأفكر دائمًا في التحكم في كل شيء بيدى، ولا أسمح للآخرين بالتدخل، مما أدى إلى انهيار العلاقات الشخصية	يبدو أنك تعاني من الرغبة الجامحة في السيطرة، والتي يمكن أن تكون سمة شخصية صعبة. قد تجد صعوبة في السماح للآخرين بالقيام بالأشياء بطريقتهم الخاصة، وقد تشعر بالحاجة إلى التحكم في كل شيء. هذا يمكن أن يؤدي إلى انهيار العلاقات الشخصية، حيث قد يشعر الناس بأنك لا تثق بهم أو لا تحترمهم. هناك بعض الأشياء التي يمكنك القيام بها للعمل على الرغبة الجامحة في السيطرة لديك. أولاً، حاول أن تكون أكثر وعيًا بسلوكك. …
غالبًا ما أشعر أن عقلي فوضوي للغاية ، كما لو كان هناك الكثير من الأفكار والأصوات في رأسي في نفس الوقت ، مما يجعلني أشعر بالارتباك والضياع.	أفهم أنك تشعر أن عقلك فوضوي للغاية ، كما لو كان هناك الكثير من الأفكار والأصوات في رأسك في نفس الوقت ، مما يجعلك تشعر بالارتباك والضياع. هذا يمكن أن يكون شعورًا محبطًا للغاية ، وأنا هنا لمساعدتك. هناك بعض الأشياء التي يمكنك القيام بها لمساعدة عقلك على الشعور بمزيد من التنظيم والتركيز. أولاً ، حاول أن تأخذ بعض الوقت كل يوم للاسترخاء وتهدئة عقلك. يمكنك القيام بذلك عن طريق التأمل أو اليوجا أو قضاء ب…
لماذا تنتقدني عائلتي على كل فعل أقوم به	هناك عدة أسباب محتملة لانتقاد عائلتك لك على كل فعل تقوم به. فيما يلي بعض الاحتمالات: * قد يكون لديهم توقعات عالية لك ويريدونك أن تكون الأفضل. * قد يكونون قلقين عليك ويريدون التأكد من أنك تفعل الأشياء بشكل صحيح. * قد يكون لديهم أفكار مختلفة عما هو الأفضل لك ويريدونك أن تتبع نصائحهم. * قد يكونون غير آمنين ويشعرون بالتهديد من نجاحك. * قد يكونون ببساطة أشخاصًا سلبيين ويرون دائمًا الأسوأ في المواقف. م…
أشعر بالإرهاق الدائم في الآونة الأخيرة وفقدان الطاقة، حتى أنني أنام لفترات طويلة، لكن لا يتحسن الوضع	هناك العديد من الأسباب المحتملة للشعور بالإرهاق وفقدان الطاقة، بما في ذلك: * قلة النوم: إذا كنت لا تحصل على قسط كافٍ من النوم، فقد تشعر بالتعب والإرهاق. معظم البالغين يحتاجون إلى حوالي 7-8 ساعات من النوم كل ليلة. * سوء التغذية: إذا كنت لا تتناول نظامًا غذائيًا صحيًا، فقد لا تحصل على العناصر الغذائية التي يحتاجها جسمك لإنتاج الطاقة. تأكد من تناول الكثير من الفواكه والخضروات والحبوب الكاملة والبروت…
أشعر وكأنني فقدت كل الحافز والأمل وأن الحياة لا معنى لها	أشعر وكأنني فقدت كل الحافز والأمل وأن الحياة لا معنى لها. هذا شعور شائع، وأنت لست وحدك. هناك أشياء يمكنك القيام بها لمساعدة نفسك على الشعور بالتحسن. أولاً، تحدث إلى شخص تثق به، مثل صديق أو أحد أفراد العائلة أو معالج. يمكن أن يساعدك التحدث عن مشاعرك في معالجتها وفهمها بشكل أفضل. ثانيًا، حاول أن تعتني بنفسك جسديًا. تأكد من حصولك على قسط كافٍ من النوم وتناول الطعام الصحي وممارسة الرياضة بانتظام. يمك…
أشعر بتوتر شديد أحيانًا ، وأشعر أيضًا بالإحباط أحيانًا ، لكنني لا أعرف كيف أغير مزاجي	هناك العديد من الأشياء التي يمكنك القيام بها لتغيير مزاجك. فيما يلي بعض النصائح: * **مارس الرياضة.** ممارسة الرياضة هي طريقة رائعة لتحسين مزاجك وتقليل التوتر. حتى المشي السريع لمدة 30 دقيقة يمكن أن يحدث فرقًا كبيرًا. * **احصل على قسط كافٍ من النوم.** عندما لا تحصل على قسط كافٍ من النوم ، فقد تشعر بالتعب والتهيج والعصبية. تأكد من حصولك على 7-8 ساعات من النوم كل ليلة. * **تناول نظامًا غذائيًا صحيًا…
أعاني من مشاكل في تفكيري وإدراكي ، وكثيرًا ما أسمع أصواتًا غريبة أو أرى أشياء غريبة تجعلني أشعر بالخوف الشديد	هل يمكن أن تخبرني المزيد عن الأصوات الغريبة أو الأشياء الغريبة التي تسمعها أو تراها؟
غالبًا ما أشعر بالتوتر والقلق ، غير قادر على التحكم في مشاعري والتوتر ، مما يجعلني أشعر بقلق شديد وضيق.	يمكن أن يكون القلق والتوتر أمرًا شائعًا ، ويمكن أن يكون لهما تأثير كبير على حياتنا. هناك بعض الأشياء التي يمكنك القيام بها للمساعدة في إدارة القلق والتوتر ، مثل: * ممارسة تمارين التنفس العميق أو اليقظة الذهنية. * الحصول على قسط كافٍ من النوم. * تناول نظام غذائي صحي. * ممارسة الرياضة بانتظام. * تجنب الكافيين والكحول والمخدرات. * قضاء الوقت مع الأصدقاء والعائلة. * التحدث إلى معالج أو مستشار. إذا كن…
غالبًا ما أشعر بالوحدة والعجز ، وأشعر بالفراغ حتى عندما يكون حولي شخص ما. لا أعرف لماذا يحدث هذا ، كيف يمكنني طلب المساعدة؟	أشعر بالأسف لسماع أنك تشعر بالوحدة والعجز. يمكن أن يكون الشعور بالفراغ حتى عندما يكون حولك شخص ما أمرًا صعبًا للغاية. هناك بعض الأشياء التي يمكنك القيام بها لطلب المساعدة. أولاً ، تحدث إلى شخص تثق به ، مثل صديق أو أحد أفراد العائلة أو معالج. يمكن أن يساعدك التحدث عن مشاعرك مع شخص ما في معالجتها وفهمها بشكل أفضل. ثانيًا ، اعتني بنفسك جسديًا. تأكد من حصولك على قسط كافٍ من النوم وتناول الطعام الصحي …
لقد أصبت بصدمة في الماضي ، والآن أتذكر دائمًا تلك التجربة مع الخوف والألم ، وأحتاج إلى طلب المساعدة للتغلب على هذه المشاعر.	أتفهم أنك مررت بصدمة في الماضي وأنك تعاني الآن من الخوف والألم. يمكن أن تكون الصدمة تجربة صعبة للغاية ويمكن أن يكون لها تأثير عميق على حياتك. من المهم أن تطلب المساعدة للتغلب على هذه المشاعر. هناك العديد من الموارد المتاحة لمساعدتك ، بما في ذلك العلاج والمشورة والدعم من الأصدقاء والعائلة. من المهم أن تتذكر أنك لست وحدك وأن هناك أشخاصًا يهتمون بك ويريدون مساعدتك.
لا أستطيع التخلص من ذكريات الماضي ، وكلما فكرت في أشياء معينة أشعر بألم شديد ، بل إنها تؤثر على حياتي اليومية.	يبدو أنك تعاني من اضطراب ما بعد الصدمة. اضطراب ما بعد الصدمة هو اضطراب في الصحة العقلية يمكن أن يحدث بعد التعرض لحدث صادم أو مخيف. يمكن أن تشمل الأعراض ذكريات الماضي ، والكوابيس ، ومشاكل النوم ، وصعوبة التركيز ، والشعور بالتوتر أو القلق. إذا كنت تعتقد أنك قد تعاني من اضطراب ما بعد الصدمة ، فمن المهم التحدث إلى أخصائي الصحة العقلية. يمكنهم مساعدتك في فهم حالتك وتقديم العلاج.
اعتدت على التعرض للتنمر، والآن كلما فكرت في الأمر أشعر بالخوف وحتى أنني أرى الكوابيس في منامي	يبدو أنك قد تعرضت لصدمة شديدة بسبب التنمر الذي تعرضت له. من المهم أن تتذكر أنك لست وحدك وأن هناك أشخاصًا يهتمون بك ويريدون مساعدتك. من المهم أيضًا أن تطلب المساعدة من شخص تثق به، مثل أحد الوالدين أو المعلم أو المستشار. يمكنهم مساعدتك في التعامل مع الصدمة التي تعرضت لها وتطوير استراتيجيات للتغلب على مخاوفك.
أشعر بالوحدة أكثر فأكثر ، لا أصدقاء ولا أقارب ، حتى لو كان هناك شخص ما ، أشعر بالفراغ وعدم الراحة	أشعر بالأسف لسماع أنك تشعر بالوحدة. يمكن أن يكون الشعور بالوحدة تجربة صعبة، ولكن من المهم أن تتذكر أنك لست وحدك. هناك الكثير من الأشخاص الذين يشعرون بالوحدة أيضًا، وهناك العديد من الأشياء التي يمكنك القيام بها للتغلب على هذا الشعور. إليك بعض النصائح: * تحدث إلى شخص تثق به. يمكن أن يكون صديقًا أو أحد أفراد العائلة أو معالجًا. يمكن أن يساعدك التحدث عن مشاعرك مع شخص آخر في الشعور بالراحة وتقليل الشع…
أشعر دائمًا أنني لا أستطيع التركيز ، ومن الصعب إكمال المهام ، وغالبًا ما أشعر بالتعب والاكتئاب	هل واجهت أي تغييرات في الشهية أو الوزن مؤخرًا؟
غالبًا ما أشعر بالوحدة والضياع ، غير قادر على إقامة علاقات وثيقة مع الآخرين ، وحتى أفقد الاهتمام والحماس للأشخاص والأشياء من حولي.	أشعر بالأسف لسماع أنك تشعر بالوحدة والضياع. يمكن أن يكون الشعور بالعزلة وعدم الاتصال بالآخرين أمرًا صعبًا للغاية. هناك بعض الأشياء التي يمكنك القيام بها لمحاولة تحسين وضعك. أولاً ، حاول تحديد سبب شعورك بالوحدة. هل أنت منعزل اجتماعيًا؟ هل لديك صعوبة في تكوين صداقات؟ هل تشعر أنك لا تنتمي؟ بمجرد أن تعرف سبب شعورك بالوحدة ، يمكنك البدء في معالجة المشكلة. ثانيًا ، حاول إيجاد طرق للتواصل مع الآخرين. ان…
أشعر بالوحدة والضياع ولا أشعر أنني أستطيع تكوين علاقات وثيقة مع أشخاص آخرين ، مما يجعلني مكتئبًا للغاية وعاجزًا.	أشعر بالأسف لسماع أنك تشعر بالوحدة والضياع. يمكن أن يكون الشعور بعدم القدرة على تكوين علاقات وثيقة مع الآخرين أمرًا صعبًا للغاية ، ويمكن أن يؤدي إلى الشعور بالاكتئاب والعجز. ومع ذلك ، هناك أشياء يمكنك القيام بها لتحسين وضعك. أولاً ، من المهم أن تتذكر أنك لست وحدك. هناك الكثير من الناس الذين يشعرون بنفس الطريقة التي تشعر بها. ثانيًا ، من المهم أن تكون لطيفًا مع نفسك. لا بأس في الشعور بالوحدة والضي…
كل من حولي سعداء ، لكني أشعر بالفراغ في داخلي ، غير قادر على الاستمتاع بأي متعة	أشعر أنك تشعر بالفراغ في الداخل ، وغير قادر على الاستمتاع بأي متعة. هذا شعور شائع ، وأنا هنا لمساعدتك في معالجته. هناك العديد من الأشياء التي يمكن أن تسبب الشعور بالفراغ ، بما في ذلك: * الشعور بالوحدة أو العزلة * فقدان شخص عزيز * التعرض لصدمة أو حدث مؤلم * الشعور بعدم الهدف أو الاتجاه في الحياة * الشعور بالإرهاق أو الإرهاق إذا كنت تعاني من أي من هذه الأشياء ، فقد يكون من المفيد التحدث إلى معالج أ…
كان لديّ تدني احترام الذات وشعرت في كثير من الأحيان بعدم الجدوى وعدم الأهمية ، مما جعلني أخاف من متابعة أحلامي وأهدافي ، خوفًا من الفشل وأن يحتقرني الآخرون.	يبدو أنك مررت بالكثير من الألم والمعاناة. من المهم أن تتذكر أنك لست وحدك وأن هناك أشخاصًا يهتمون بك ويريدون مساعدتك. من المهم أيضًا أن تتذكر أنك قوي وقادر على التغلب على هذا. قد يكون من المفيد التحدث إلى معالج أو مستشار لمساعدتك في معالجة مشكلات احترام الذات لديك والخوف من الفشل. يمكنهم أيضًا مساعدتك في تطوير استراتيجيات للتغلب على هذه المشكلات. تذكر أنك لست وحدك وأن هناك أشخاصًا يهتمون بك ويريدو…
أجد نفسي أكثر حساسية تجاه الأشياء وغالبًا ما أشعر بالقلق وعدم الأمان بشأن الأشياء الصغيرة	يبدو أنك تمر بوقت عصيب. من المهم أن تتذكر أنك لست وحدك وأن هناك أشخاصًا يهتمون بك ويريدون مساعدتك. إذا كنت تشعر بالإرهاق، فلا تتردد في التواصل مع صديق أو أحد أفراد العائلة أو معالج نفسي. هناك أيضًا العديد من الموارد المتاحة عبر الإنترنت لمساعدتك في التعامل مع القلق وانعدام الأمن. تذكر أنك لست وحدك وأن هناك أشخاصًا يهتمون بك ويريدون مساعدتك.
كان والداي دائمًا يتوقعان مني أن أكون شخصًا جيدًا، لكنني شعرت أنني لست على مستوى معاييرهم، إنني أشعر بالقلق وعدم الثقة بالذات	يبدو أنك تشعر بالضغط لتكون مثاليًا، وهذا يمكن أن يكون مرهقًا للغاية. من المهم أن تتذكر أن لا أحد كامل، وأن الجميع يرتكب أخطاء. بدلاً من التركيز على أن تكون مثاليًا، ركز على أن تكون أفضل نسخة من نفسك. هذا يعني أن تكون لطيفًا مع نفسك، وأن تسامح نفسك على أخطائك، وأن تتعلم من تجاربك. من المهم أيضًا أن تتذكر أنك لست وحدك، وأن هناك أشخاصًا آخرين يشعرون بنفس الطريقة. يمكنك التحدث إلى والديك أو إلى صديق …
أحلم كل يوم كأنني ضائع في متاهة بلا مخرج، ويتكرر الحلم مرارًا وتكرارًا	هل يمكنك وصف المتاهة بمزيد من التفصيل؟ ما الذي تراه وتسمعه وتشعر به عندما تكون في المتاهة؟
عندما أكون بمفردي ، أفكر في كل ما حدث من قبل ، وكل شيء يجعلني أشعر ببؤس شديد	أفهم أنك تشعر بالحزن عندما تكون بمفردك. قد يكون من الصعب التفكير في كل ما حدث في الماضي ، ويمكن أن يجعلك تشعر بالسوء. ومع ذلك ، من المهم أن تتذكر أنك لست وحدك في هذا. هناك أشخاص يهتمون بك ويريدون مساعدتك. إذا كنت بحاجة إلى شخص للتحدث إليه ، فلا تتردد في التواصل معي. أنا هنا من أجلك.
عندما أرى شكلي، أشعر بأنني قبيحة للغاية، وسيئة للغاية	أنت لست قبيحة ولا سيئة. أنت جميلة وفريدة من نوعك. أنت تستحقين أن تحبي نفسك كما أنت.
أنا أعاني من مرض التوحد ، ولا أعرف كيف أتواصل مع الآخرين ، وأشعر بالعزلة في عالم مختلف تمامًا ، وأشعر بالبؤس الشديد والعجز.	أفهم أنك تواجه وقتًا عصيبًا في التواصل مع الآخرين وأنك تشعر بالعزلة. يمكن أن يكون مرض التوحد تحديًا ، لكن هناك أشياء يمكنك القيام بها لتحسين مهارات الاتصال لديك والشعور بمزيد من الاتصال بالعالم من حولك. إليك بعض النصائح: * تحدث إلى طبيبك أو أخصائي الصحة العقلية حول مرض التوحد لديك. يمكنهم مساعدتك في فهم حالتك بشكل أفضل وتزويدك باستراتيجيات للتغلب على التحديات التي تواجهها. * انضم إلى مجموعة دعم أ…
لقد تعرضت للخيانة من قبل صديق ، لقد آلمني كثيرًا ، وبدأت أشك في مصداقية الإنسانية والصداقة ، وحتى بدأت في الانغلاق على نفسي وإبعاد الآخرين	أفهم أنك تعرضت للخيانة من قبل صديق ، وأن هذا قد سبب لك الكثير من الألم. من الطبيعي أن تشعر بالشك في مصداقية الإنسانية والصداقة ، وأن ترغب في الانغلاق على نفسك وإبعاد الآخرين. ومع ذلك ، من المهم أن تتذكر أن ليس كل الناس سيئون ، وأن هناك من يستحق الثقة. حاول أن تمنح نفسك بعض الوقت للشفاء من هذه التجربة ، ولا تدعها تمنعك من تكوين صداقات جديدة في المستقبل.
في مجتمع اليوم ، غالبًا ما يتخلى الناس عن أنفسهم أو حتى ينتحروا لأنهم لا يستطيعون إكمال عملهم.	في مجتمع اليوم ، غالبًا ما يتخلى الناس عن أنفسهم أو حتى ينتحروا لأنهم لا يستطيعون إكمال عملهم. هذا أمر مؤسف للغاية ، حيث أن هناك العديد من الموارد المتاحة للأشخاص الذين يعانون من الاكتئاب أو الأفكار الانتحارية. إذا كنت تكافح ، يرجى التماس المساعدة. هناك أشخاص يهتمون بك ويريدون مساعدتك على الشعور بالتحسن.
كنت أفكر دائمًا في ماضي ومستقبلي ، وأشعر بالقلق والانزعاج حيال ذلك ، ولا أعرف ماذا أفعل به.	من الطبيعي أن تفكر في ماضيك ومستقبلك ، لكن من المهم أيضًا أن تعيش في الوقت الحاضر. حاول التركيز على الأشياء التي يمكنك التحكم فيها ، مثل أفعالك وقراراتك ، ودع الأشياء الأخرى تذهب. تذكر أنك لست وحدك ، وأن هناك أشخاصًا آخرين يشعرون بنفس الطريقة. تحدث إلى شخص تثق به ، مثل صديق أو أحد أفراد العائلة ، أو اطلب المساعدة المهنية من معالج أو مستشار.
أشعر دائمًا بالحرج عندما أكون أمام مجموعة كبيرة من الناس	من الطبيعي أن تشعر بالحرج عندما تكون أمام مجموعة كبيرة من الناس. ومع ذلك ، هناك بعض الأشياء التي يمكنك القيام بها للتغلب على هذا الشعور. أولاً ، حاول أن تتذكر أن الجميع يشعر بنفس الطريقة تقريبًا. ثانيًا ، ركز على ما تريد قوله بدلاً من التفكير في نفسك. أخيرًا ، خذ نفسًا عميقًا وتحدث ببطء وثقة.
أنا غير راضٍ عن مظهري ودائماً أشعر بالقبح ، الأمر الذي يجعلني غير واثق للغاية من التواصل الاجتماعي وتكوين الصداقات ، فكيف يمكنني تغيير هذه العقلية؟	* **تذكر أن الجمال يأتي بأشكال وأحجام مختلفة.** لا يوجد تعريف واحد للجمال ، وكل شخص جميل بطريقته الخاصة. ركز على الأشياء التي تحبها في مظهرك ، وتجاهل الأشياء التي لا تحبها. * **اعتني بنفسك.** تأكد من حصولك على قسط كافٍ من النوم ، وتناول نظامًا غذائيًا صحيًا ، وممارسة التمارين الرياضية بانتظام. عندما تعتني بنفسك جسديًا ، ستشعر بتحسن تجاه نفسك عقليًا. * **ارتدِ ملابس تشعرك بالثقة.** لا يجب أن تكون …
أنا مليء بالخوف والقلق بشأن المستقبل ، ولا أعرف كيف أتعامل مع التحديات والضغوط في المستقبل.	أفهم أنك تشعر بالخوف والقلق بشأن المستقبل. هذا أمر طبيعي، حيث أن المستقبل غير مؤكد ويمكن أن يكون من الصعب التنبؤ بما سيحدث. ومع ذلك، هناك بعض الأشياء التي يمكنك القيام بها للمساعدة في التعامل مع مخاوفك. أولاً، حاول التركيز على الأشياء التي يمكنك التحكم فيها. على سبيل المثال، يمكنك التحكم في كيفية الاستعداد للمستقبل من خلال اتخاذ قرارات جيدة بشأن تعليمك وحياتك المهنية. يمكنك أيضًا التحكم في كيفية …
أجد نفسي دائمًا عالقًا في حلقات تفكير لا يمكن إيقافها، أفكر في نفس المشكلة أو الموقف مرارًا وتكرارًا، مما يؤدي بي إلى قلة النوم ويؤثر على حياتي اليومية.	أفهم أنك تواجه صعوبة في التوقف عن التفكير في نفس المشكلة أو الموقف مرارًا وتكرارًا. هذا يمكن أن يكون محبطًا للغاية ويؤثر على حياتك اليومية. إليك بعض النصائح التي قد تساعدك: * تحدث إلى شخص تثق به عن ما تمر به. يمكن أن يساعدك التحدث عن أفكارك ومشاعرك مع شخص آخر في معالجتها بشكل أفضل. * مارس تقنيات الاسترخاء مثل اليوجا أو التأمل. يمكن أن تساعدك هذه الأنشطة على تهدئة عقلك وجسمك وتقليل القلق. * احصل ع…
لقد مررت ببعض التجارب المؤلمة التي ما زالت عالقة معي. وجدت صعوبة في معالجة هذه المشاعر والذكريات ، مما تسبب في تدهور صحتي العقلية تدريجياً.	أفهم أنك مررت ببعض التجارب المؤلمة التي لا تزال تؤثر عليك. يمكن أن يكون التعامل مع الصدمة أمرًا صعبًا للغاية ، ومن المهم أن تطلب المساعدة إذا كنت تكافح. هناك العديد من الموارد المتاحة لمساعدتك في معالجة هذه المشاعر والذكريات ، بما في ذلك العلاج والمشورة والدعم من الأصدقاء والعائلة. من المهم أن تتذكر أنك لست وحدك ، وأن هناك أشخاصًا يهتمون بك ويريدون مساعدتك.
غالبًا ما أشعر بالاكتئاب والإحباط، أفقد الفرح والدافع في الحياة ، وليس لدي ثقة في المستقبل ، هذه المشاعر تجعلني أشعر بالألم الشديد والعجز.	أفهم أنك تمر بوقت عصيب. الاكتئاب والإحباط مشاعر شائعة، ويمكن أن تكون مؤلمة للغاية. من المهم أن تتذكر أنك لست وحدك، وأن هناك أشخاصًا يمكنهم مساعدتك. هناك عدد من الأشياء التي يمكنك القيام بها للمساعدة في تخفيف الاكتئاب والإحباط. فيما يلي بعض النصائح: * تحدث إلى شخص تثق به، مثل صديق أو أحد أفراد العائلة أو معالج. يمكن أن يساعدك التحدث عن مشاعرك في معالجتها وفهمها بشكل أفضل. * اعتني بنفسك جسديًا. تأك…
في الآونة الأخيرة ، غالبًا ما يفقد أطفالهم أعصابهم بل ويتلفون أشياء في المنزل ، والتي قد تكون من أعراض الاكتئاب	الاكتئاب هو حالة صحية عقلية خطيرة يمكن أن تؤثر على الأطفال والمراهقين. يمكن أن يسبب الاكتئاب مجموعة متنوعة من الأعراض ، بما في ذلك الحزن المستمر ، وفقدان الاهتمام بالأنشطة التي كانت ممتعة في السابق ، والتغيرات في الشهية أو النوم ، والشعور بالذنب أو انعدام القيمة ، ومشاكل في التركيز أو اتخاذ القرارات ، والأفكار حول الموت أو الانتحار. إذا كنت تعتقد أن طفلك يعاني من الاكتئاب ، فمن المهم التحدث إلى ط…
غالبًا ما أشعر بالتوتر والقلق ، حتى الأشياء الصغيرة يمكن أن تجعلني أشعر بالقلق والتوتر ، من الصعب الاسترخاء والاستمتاع بالحياة	أشعر بالأسف لسماع أنك تشعر بالتوتر والقلق في كثير من الأحيان. يمكن أن يكون القلق شعورًا صعبًا للغاية للتعامل معه ، ويمكن أن يؤثر على حياتك اليومية. هناك بعض الأشياء التي يمكنك القيام بها للمساعدة في تقليل القلق لديك ، مثل: * ممارسة تمارين الاسترخاء ، مثل التنفس العميق أو اليوجا أو التأمل. * الحصول على قسط كافٍ من النوم. * تناول نظام غذائي صحي. * ممارسة الرياضة بانتظام. * تجنب الكافيين والكحول وال…
أنا غير راضٍ جدًا عن جسدي ، دائمًا ما أشعر بأنني سمين جدًا أو نحيف جدًا ، ولا أعرف كيف أتقبل جسدي	أتفهم أنك غير راضٍ عن جسدك. هذا شعور شائع جدًا، ويصيب الكثير من الناس في مرحلة ما من حياتهم. من المهم أن تتذكر أنك لست وحدك، وأن هناك أشخاصًا آخرين يشعرون بنفس الطريقة. هناك بعض الأشياء التي يمكنك القيام بها لمساعدتك على تقبل جسدك. أولاً، حاول أن تركز على الأشياء التي تحبها في جسدك. قد يكون لديك شعر جميل، أو عيون جميلة، أو ابتسامة جميلة. ركز على هذه الأشياء الإيجابية، وحاول أن تتجاهل الأشياء التي…
إنني أفتقر إلى الثقة في أدائي وقدراتي ، وأشعر دائمًا أنني لا أستطيع أن أفعل بشكل جيد ، وأخشى الفشل وأن يسخر مني الآخرون.	أفهم أنك تشعر بعدم الثقة في أدائك وقدراتك. هذا شعور شائع، ويمكن أن يكون محبطًا للغاية. ومع ذلك، هناك أشياء يمكنك القيام بها لبناء ثقتك بنفسك. أولاً، من المهم أن تتذكر أن الجميع يرتكب أخطاء. لا أحد كامل، والجميع لديه نقاط ضعف. عندما ترتكب خطأ، لا تدع ذلك يثبط عزيمتك. بدلاً من ذلك، تعلم من خطأك واستمر في المضي قدمًا. ثانيًا، ركز على نقاط قوتك. ما الذي تجيده؟ ما الذي تستمتع به؟ عندما تركز على نقاط ق…
يتقلب مزاجي بشكل كبير،أكون متحمسًا أحيانًا، وأحيانًا أخرى محبطًأ، دون أي نمط	يبدو أنك تمر بتقلبات مزاجية حادة. هل لاحظت أي محفزات معينة تسبب هذه التقلبات؟ هل هناك أي شيء يمكنك القيام به للمساعدة في إدارة تقلبات المزاج لديك؟ إذا كنت تشعر أن تقلبات المزاج لديك تؤثر على حياتك بشكل كبير، فقد ترغب في التحدث إلى أخصائي الصحة العقلية حول خيارات العلاج.
عندما أكون في حشد من الناس ، أشعر دائمًا بالتجاهل ، أو حتى أنني غير موجود ، مما يجعلني أشعر بالوحدة الشديدة والضياع	أشعر أنك تشعر بالوحدة والضياع عندما تكون في حشد من الناس. هذا شعور شائع جدًا ، ويمكن أن يكون ساحقًا. من المهم أن تتذكر أنك لست وحدك في هذا الشعور ، وأن هناك أشخاصًا آخرين يشعرون بنفس الطريقة. هناك بعض الأشياء التي يمكنك القيام بها لمساعدة نفسك على الشعور بالراحة في الحشود. أولاً ، حاول أن تركز على تنفسك. خذ نفسًا عميقًا وزفيرًا بطيئًا. سيساعدك هذا على الاسترخاء والتركيز على نفسك بدلاً من الأشخاص …
غالبًا ما أشعر أنني لست جيدًا بما يكفي للحصول على موافقة واحترام الآخرين	* تذكر أنك لست وحدك. يشعر الكثير من الناس بنفس الطريقة في مرحلة ما من حياتهم. * ركز على نقاط قوتك وإنجازاتك. ما الذي أنت جيد فيه؟ ما الذي تفخر به؟ * لا تقارن نفسك بالآخرين. الجميع مختلف ولديه نقاط قوته وضعفه الفريدة. * كن لطيفًا مع نفسك. تحدث إلى نفسك كما تتحدث إلى صديق. * لا تخف من طلب المساعدة إذا كنت بحاجة إليها. هناك أشخاص يهتمون بك ويريدون مساعدتك في الشعور بالتحسن.
أشعر بالارتباك والعجز بشأن المستقبل ، ولا أعرف الاتجاه الذي يجب أن أسلكه ، فهذا يجعلني أشعر بالقلق الشديد وعدم الراحة	أشعر بالأسف لسماع أنك تشعر بالارتباك والعجز بشأن المستقبل. يمكن أن يكون هذا شعورًا صعبًا للغاية. ومع ذلك ، هناك بعض الأشياء التي يمكنك القيام بها للمساعدة في تخفيف قلقك وعدم الراحة. أولاً ، من المهم أن تتذكر أنك لست وحدك. يشعر الكثير من الناس بالارتباك والعجز بشأن المستقبل في مرحلة ما من حياتهم. هذا جزء طبيعي من كونك إنسانًا. ثانيًا ، حاول التركيز على الأشياء التي يمكنك التحكم فيها. لا يمكنك التح…
كنت دائمًا قلقًا من أن يتم انتقاد أفعالي وقراراتي ورفضها من قبل الآخرين ، مما جعلني أشعر بعدم الأمان والإحباط.	أفهم أنك كنت تشعر بالقلق من أن يتم انتقاد أفعالك وقراراتك ورفضها من قبل الآخرين. هذا يمكن أن يكون شعورًا صعبًا للغاية ويمكن أن يجعلك تشعر بعدم الأمان والإحباط. أود أن أؤكد لك أنك لست وحدك في هذا الشعور. كثير من الناس يشعرون بنفس الطريقة. ومع ذلك ، هناك بعض الأشياء التي يمكنك القيام بها للتغلب على هذا القلق. أولاً ، حاول أن تتذكر أن الجميع يتعرضون للنقد في مرحلة ما من حياتهم. إنه جزء طبيعي من الحي…
أريد أن أقتل نفسي لكنني لا أجرؤ ، أريد فقط إخفاء نفسي وعدم الخروج مرة أخرى	أفهم أنك تشعر باليأس والألم في الوقت الحالي. من المهم أن تتذكر أنك لست وحدك وأن هناك أشخاصًا يهتمون بك ويريدون مساعدتك. إذا كنت تفكر في إيذاء نفسك ، فيرجى الاتصال بخط منع الانتحار على الرقم 1-800-273-8255. يمكنك أيضًا التحدث إلى صديق أو أحد أفراد العائلة أو معالج موثوق به. هناك أشخاص يهتمون بك ويريدون مساعدتك في تجاوز هذا الوقت الصعب.
عائلتي تنتقدني دائمًا وتجعلني أشعر بأذى شديد ، لا أعرف كيف أتواصل معهم ، لقد أصبحوا بعيدون جدًا عني	أفهم أنك تشعر بالأذى والغضب من انتقادات عائلتك. من المهم أن تتذكر أنك لست وحدك في هذا الشعور. كثير من الناس يكافحون مع عائلاتهم في مرحلة ما من حياتهم. هناك بعض الأشياء التي يمكنك القيام بها لمحاولة تحسين التواصل مع عائلتك. أولاً ، حاول أن تكون منفتحًا وصادقًا معهم بشأن مشاعرك. أخبرهم كيف تشعر عندما ينتقدونك وكيف يؤثر ذلك عليك. ثانيًا ، حاول أن تكون متفهمًا لوجهة نظرهم. حاول أن ترى الأمور من منظور…
كنت أشعر بالإحباط من الأشياء الصغيرة ، وأواجه صعوبة في التعافي من التدهور العاطفي ، وشعرت بأنني لا قيمة لي.	يبدو أنك تمر بوقت عصيب. من المهم أن تتذكر أنك لست وحدك وأن هناك أشخاصًا يهتمون بك ويريدون مساعدتك. من المهم أيضًا أن تكون لطيفًا مع نفسك وأن تتذكر أنك تستحق الحب والاحترام. إذا كنت تكافح من أجل التعامل مع مشاعرك ، فلا تتردد في طلب المساعدة من الأصدقاء أو العائلة أو أخصائي الصحة العقلية.
لقد تعرضت للتنمر من قبل زملائي ، مما أدى إلى الشعور بالنقص والخوف من الرفض.	أشعر بالأسف لسماع أنك تعرضت للتنمر من قبل زملائك. يمكن أن يكون التنمر تجربة مؤلمة للغاية ويمكن أن يكون له تأثير سلبي على احترامك لذاتك وثقتك بنفسك. من المهم أن تتذكر أنك لست وحدك وأن هناك أشخاصًا يهتمون بك ويريدون مساعدتك. إذا كنت تشعر بالاكتئاب أو القلق، فيرجى التحدث إلى شخص تثق به، مثل أحد الوالدين أو المعلم أو المستشار. هناك أيضًا العديد من الموارد المتاحة عبر الإنترنت لمساعدتك في التعامل مع ا…
في الآونة الأخيرة ، أشعر دائمًا أن مزاجي يتقلب كثيرًا ، أحيانًا أشعر بالسعادة ، ولكن أحيانًا أشعر بالاكتئاب دون سبب ، وهذا يجعلني أشعر بضيق شديد ، ولا أعرف ما إذا كنت أعاني من الاكتئاب.	من الصعب تحديد ما إذا كنت تعاني من الاكتئاب أم لا بناءً على المعلومات التي قدمتها. ومع ذلك ، فإن التقلبات في الحالة المزاجية التي تصفها يمكن أن تكون من أعراض الاكتئاب. إذا كنت قلقًا بشأن صحتك العقلية ، فمن الأفضل التحدث إلى أخصائي الصحة العقلية. يمكنهم إجراء تقييم شامل وتقديم التشخيص والعلاج المناسبين. فيما يلي بعض العلامات والأعراض الشائعة للاكتئاب: * الشعور بالحزن أو الفراغ أو اليأس معظم الوقت …
إنني أشعر بضغط كبير، وأشعر بعدم قدرتي على تحمله، وغالبًا ما أشعر بالارتباك أو بضيق التنفس.	هل يمكنك أن تخبرني أكثر عن سبب شعورك بالضغط؟
غالبًا ما ينتابني شعور بالقلق والخوف ، ولا أعرف من أين أتى، حتى أحيانًا أشعر بصعوبة في التنفس.	أشعر بالقلق والخوف من المستقبل. لا أعرف ماذا سيحدث لي أو لعائلتي. أشعر أنني لست مستعدًا لما قد يحدث.
لطالما شعرت بأنني بلا قيمة، لست جيدًا بما فيه الكفاية، ولست ذكيًا بما فيه الكفاية، ولست جميلًا بما يكفي، وهذا يجعلني أشعر بالإحباط.	أشعر أنك لست وحدك في هذا الشعور. كثير من الناس يشعرون بنفس الطريقة. من المهم أن تتذكر أنك لست وحدك وأنك لست بلا قيمة. أنت شخص فريد ومميز ولديك الكثير لتقدمه للعالم. لا تدع أي شخص يخبرك بخلاف ذلك.
لدي دائمًا أفكار انتحارية ، أشعر أن الحياة لا معنى لها ولا قيمة لي. أشعر أيضًا باليأس وأشعر أنه لا أمل في مستقبلي	أفهم أنك تمر بوقت عصيب وأنك تشعر باليأس. من المهم أن تتذكر أنك لست وحدك وأن هناك أشخاصًا يهتمون بك ويريدون مساعدتك. إذا كنت تفكر في إيذاء نفسك ، فيرجى الاتصال بخط منع الانتحار على الرقم 1-800-273-8255. يمكنك أيضًا التحدث إلى صديق أو أحد أفراد العائلة أو معالج عن أفكارك ومشاعرك. هناك مساعدة متاحة ، ولا داعي للمعاناة وحدك.
غالبًا ما أشعر أن حياتي بلا معنى ، لا أعرف لماذا أعيش بهذه الطريقة ، أشعر أنه ليس لدي أي هدف أو دافع ، وكأنني أضيع وقتي ، وأشعر بأنني بلا قيمة	أشعر أن حياتي بلا معنى ، لا أعرف لماذا أعيش بهذه الطريقة ، أشعر أنه ليس لدي أي هدف أو دافع ، وكأنني أضيع وقتي ، وأشعر بأنني بلا قيمة. هذه مشاعر شائعة جدًا ، وقد مر بها الكثير من الناس في مرحلة ما من حياتهم. من المهم أن تعرف أنك لست وحدك ، وأن هناك أشخاصًا يمكنهم مساعدتك. هناك بعض الأشياء التي يمكنك القيام بها لمساعدة نفسك على الشعور بأن حياتك لها معنى أكبر. أولاً ، حاول أن تحدد الأشياء التي تهمك.…
لقد كنت أشعر بتوتر شديد مؤخرًا لأن لدي الكثير من العمل ويجب أن أتعامل مع العديد من المهام كل يوم ، لكن ليس لدي شعور بالإنجاز ، مما يجعلني أشعر بالإحباط الشديد. كيف يمكنني التعامل مع هذا الضغط النفسى؟	هناك بعض الأشياء التي يمكنك القيام بها للتعامل مع ضغوط العمل: * **حدد أولويات مهامك.** ليس كل المهام متساوية. بعضها أكثر أهمية من البعض الآخر. خذ بعض الوقت لتحديد أولويات مهامك حتى تعرف ما الذي يجب التركيز عليه أولاً. * **قم بتفويض المهام.** إذا كان ذلك ممكنًا ، فقم بتفويض المهام إلى الآخرين. سيساعدك هذا على تحرير وقتك للتركيز على المهام الأكثر أهمية. * **خذ فترات راحة.** لا تحاول العمل لساعات طو…
غالبًا ما أشعر بالقلق والتوتر ، وأشعر أنني لا أستطيع التعامل مع الضغوط والتحديات في الحياة.	أشعر بالأسف لسماع أنك تشعر بالقلق والتوتر. القلق والتوتر من التجارب الشائعة ، ويمكن أن يكون لها تأثير كبير على حياتنا. هناك عدد من الأشياء التي يمكنك القيام بها للمساعدة في إدارة القلق والتوتر ، بما في ذلك: * تحدث إلى شخص تثق به ، مثل صديق أو أحد أفراد العائلة أو معالج. يمكن أن يساعدك التحدث عن مخاوفك مع شخص آخر في الشعور بالراحة والدعم. * مارس تقنيات الاسترخاء ، مثل التنفس العميق أو اليوجا أو ال…
عقلي مليء بالسلبية وعدم الثقة بالنفس ولا أعرف كيف أخرج منه	أفهم أنك تشعر بالسلبية وعدم الثقة بالنفس، وهذا يمكن أن يكون شعورًا صعبًا للغاية. ومع ذلك، هناك أشياء يمكنك القيام بها لمساعدة نفسك على الخروج من هذا الشعور. أولاً، حاول تحديد الأفكار السلبية التي لديك عن نفسك. بمجرد أن تعرف ما هي هذه الأفكار، يمكنك البدء في تحديها. على سبيل المثال، إذا كنت تعتقد أنك لست جيدًا بما يكفي، يمكنك أن تسأل نفسك عما إذا كان هذا صحيحًا حقًا. هل لديك حقًا دليل على أنك لست …
أشعر أن مشاعري أصبحت غير مستقرة أكثر. فأحيانًا أشعر بالاكتئاب وأحيانًا أشعر بالعاطفة. لا أعرف ما إذا كان هناك شيء خاطئ في ذهني.	من الطبيعي أن تتقلب مشاعرك. فجميعنا نمر بأوقات نشعر فيها بالاكتئاب أو العاطفة. ومع ذلك، إذا كنت تشعر أن تقلباتك المزاجية أصبحت أكثر حدة أو متكررة، فقد يكون من المفيد التحدث إلى طبيب أو معالج نفسي. يمكنهم مساعدتك في تحديد ما إذا كان هناك أي شيء خاطئ في صحتك العقلية وتقديم المشورة لك حول كيفية إدارة تقلباتك المزاجية. فيما يلي بعض النصائح لمساعدتك على إدارة تقلباتك المزاجية: * احصل على قسط كافٍ من ا…
عندما يعود الطفل إلى المنزل من المدرسة يكون المنزل باردًا ولا يقبل أبدًا لطفه، فإن ارتكب خطأ فلن يلقى له بالًا، ما يستدعي القلق هو ما إذا كان سيصبح مثل والديه عندما يكبر.	من الصعب التنبؤ بما إذا كان الطفل سيكبر ليصبح مثل والديه أم لا. هناك العديد من العوامل التي تؤثر على تطور الطفل ، بما في ذلك علم الوراثة والبيئة والخبرات الشخصية. ومع ذلك ، هناك بعض الأشياء التي يمكن أن تزيد من احتمالية أن يصبح الطفل مثل والديه. على سبيل المثال ، إذا كان الطفل يتعرض باستمرار للعنف أو الإهمال ، فقد يكون أكثر عرضة لتطوير مشاكل سلوكية أو عاطفية مماثلة لتلك التي يعاني منها والديه. با…
لا يستطيع النوم كل ليلة تقريبًا ، ولا يستطيع النوم ولا يستطيع النوم ، ومزاجه يزداد سوءًا ، ويشعر بالقلق بشأن ما إذا كان سيصاب بالاكتئاب أو مشاكل نفسية أخرى أكثر خطورة	يبدو أنك تواجه صعوبة في النوم. هذا يمكن أن يكون محبطًا للغاية ويمكن أن يؤثر على مزاجك وصحتك العامة. هناك عدد من الأشياء التي يمكنك القيام بها لتحسين نومك ، بما في ذلك: * الحفاظ على جدول نوم منتظم والذهاب إلى الفراش والاستيقاظ في نفس الوقت كل يوم ، حتى في عطلات نهاية الأسبوع. * خلق روتين مهدئ قبل النوم ، مثل الاستحمام الدافئ أو القراءة أو الاستماع إلى الموسيقى الهادئة. * تجنب الكافيين والكحول والن…
أشعر دائمًا في الآونه الأخيرة بأنني ضعيف، وأفكاري كالحبال الفوضوية، وغير قادر على استيعابها	أشعر دائمًا في الآونه الأخيرة بأنني ضعيف، وأفكاري كالحبال الفوضوية، وغير قادر على استيعابها. أتفهم أنك تشعر بالإرهاق وأن أفكارك تبدو وكأنها فوضى. قد يكون من الصعب التعامل مع هذا الشعور، لكن من المهم أن تتذكر أنك لست وحدك. كثير من الناس يشعرون بنفس الطريقة في مرحلة ما من حياتهم. هناك بعض الأشياء التي يمكنك القيام بها لمساعدة نفسك على الشعور بتحسن. أولاً، تأكد من حصولك على قسط كافٍ من النوم. عندما …
في كل مرة أفكر فيها في إخفاقاتي ، أشعر بالعجز ، أفقد شجاعتي بسبب فكرة عدم قبول المجتمع ، أشعر بالعجز من فكرة أنني قد لا أتمكن من تحقيق أحلامي	أفهم أنك تشعر بالعجز والإحباط بسبب إخفاقاتك. من المهم أن تتذكر أن الجميع يفشل في مرحلة ما من حياتهم. إنه جزء من عملية التعلم والنمو. لا تدع خوفك من عدم قبول المجتمع يمنعك من تحقيق أحلامك. إذا كنت تريد شيئًا ما ، فاذهب إليه. لا تدع أي شخص يخبرك أنه لا يمكنك فعل شيء ما. أنت أقوى مما تعتقد.
كانت علاقتي العاطفية دائمًا غير مستقرة، وغالبًا ما أعاني من أزمات عاطفية، ولا أعرف كيف أتعامل مع مشكلات العلاقة، وهذا يجعلني أشعر بالعجز والضياع.	أفهم أنك تواجه بعض التحديات في علاقتك، وأنك تشعر بالعجز والضياع. يمكن أن يكون التعامل مع مشكلات العلاقة أمرًا صعبًا، ولكن هناك بعض الأشياء التي يمكنك القيام بها للمساعدة في تحسين الوضع. أولاً، من المهم أن تتواصل مع شريكك حول ما تشعر به. أخبره أنك تشعر بالعجز والضياع، وأنك بحاجة إلى مساعدته. قد يكون قادرًا على تقديم الدعم لك، أو قد يكون قادرًا على اقتراح حلول للمشاكل التي تواجهها. ثانيًا، من المهم…
أحيانًا أفقد السيطرة على غضبي وأصبح سريع الانفعال والغضب، وحتى أنني أفقد أعصابي مع من حولي	أتفهم أنك تشعر بالإحباط من نوبات الغضب لديك. يمكن أن يكون فقدان السيطرة على غضبك أمرًا صعبًا للغاية، ويمكن أن يؤثر على علاقاتك وحياتك بشكل عام. ومع ذلك، هناك بعض الأشياء التي يمكنك القيام بها للمساعدة في إدارة غضبك. أولاً، حاول تحديد ما الذي يثير غضبك. بمجرد أن تعرف ما الذي يثير غضبك، يمكنك البدء في تجنب هذه المواقف أو تعلم كيفية التعامل معها بشكل أفضل. ثانيًا، حاول ممارسة تقنيات الاسترخاء مثل ال…
وظيفتي مرهقة والتعامل مع المشاكل والتحديات كل يوم يجعلني أشعر بقلق شديد ، أبدأ في فقدان النوم ، أفقد شهيتي وأحيانًا أشعر بالخروج عن السيطرة	أتفهم أنك تمر بوقت عصيب في عملك. يمكن أن يكون التعامل مع المشاكل والتحديات كل يوم أمرًا مرهقًا للغاية. يبدو أنك تعاني من بعض الأعراض الجسدية للتوتر ، مثل فقدان النوم وفقدان الشهية. من المهم أن تعتني بنفسك خلال هذا الوقت. تأكد من حصولك على قسط كافٍ من النوم وتناول الطعام الصحي وممارسة الرياضة بانتظام. قد تجد أيضًا أنه من المفيد التحدث إلى معالج أو مستشار حول ما تمر به. يمكنهم مساعدتك في تطوير آليا…
أنا دائمًا غير قادر على كبح جماح مشاعري ، وأحيانًا أغضب فجأة ، وأحيانًا أصمت فجأة ، مما يجعلني غير قادر على التنبؤ بسلوكي وأدائي ، وأشعر بالانزعاج والارتباك الشديد.	يبدو أنك تعاني من تقلبات مزاجية حادة. تقلبات المزاج هي تغيرات مفاجئة في الحالة المزاجية يمكن أن تكون شديدة وغير متوقعة. يمكن أن تنتقل من الشعور بالسعادة والبهجة إلى الشعور بالحزن والغضب والعصبية في غضون دقائق أو ساعات. هناك عدد من الأشياء التي يمكن أن تسبب تقلبات المزاج، بما في ذلك: * الاضطرابات الهرمونية، مثل متلازمة ما قبل الحيض أو انقطاع الطمث * قلة النوم * سوء التغذية * الإجهاد * القلق * الاك…
لا يمكنني التخلص من الانغماس في التجارب السابقة المحزنة، فكلما فكرت في تلك الأحداث، أشعر بألم وخسارة شديدة.	أفهم أنك تكافح من أجل التخلص من الانغماس في التجارب السابقة المحزنة. يمكن أن يكون هذا أمرًا صعبًا للغاية، خاصةً إذا كانت التجارب مؤلمة أو مؤلمة. ومع ذلك، هناك بعض الأشياء التي يمكنك القيام بها للمساعدة في المضي قدمًا. أولاً، من المهم أن تسمح لنفسك بالحزن على الخسارة. لا بأس في الشعور بالحزن أو الغضب أو الإحباط. في الواقع، يمكن أن يكون التعبير عن هذه المشاعر جزءًا مهمًا من عملية الشفاء. ثانيًا، حا…
غالبًا ما أشعر بالوحدة والعجز ، لا يوجد من أتحدث معه عن عالمي الداخلي، أشعر بأن العالم قد تخلى عني ، وهذا يجعلني أشعر بالألم الشديد واليأس.	أفهم أنك تشعر بالوحدة والعجز في الوقت الحالي. يبدو أنك تمر بوقت عصيب، وأنا هنا لمساعدتك. يمكن أن يكون الشعور بالوحدة والعجز أمرًا صعبًا للغاية، ولكن من المهم أن تتذكر أنك لست وحدك. هناك أشخاص يهتمون بك ويريدون مساعدتك. إذا كنت ترغب في التحدث إلى شخص ما عن عالمك الداخلي، فهناك العديد من الموارد المتاحة لك. يمكنك التحدث إلى صديق أو أحد أفراد العائلة، أو يمكنك الاتصال بخط المساعدة أو معالج. هناك أيض…
غالبًا ما أشعر بالدونية والعجز بسبب عيوبي ، وأشعر أنني لست جيدًا بما يكفي ، ولا أستحق الحب	* تذكر أن الجميع لديه عيوب. لا يوجد أحد كامل. * ركز على نقاط قوتك بدلاً من نقاط ضعفك. ما الذي تجيده؟ ما الذي تستمتع به؟ * لا تقارن نفسك بالآخرين. الجميع مختلف ، ولكل شخص نقاط قوته وضعفه الفريدة. * كن لطيفًا مع نفسك. تحدث إلى نفسك كما تتحدث إلى صديق. * لا تخف من طلب المساعدة إذا كنت بحاجة إليها. هناك أشخاص يهتمون بك ويريدون مساعدتك في الشعور بالتحسن.
لدي الكثير من العمل وضغط الدراسة ، وغالبًا ما أشعر بالإرهاق ، لكنني لا أعرف كيفية الاسترخاء والتخلص من التوتر.	إليك بعض النصائح حول كيفية الاسترخاء والتخلص من التوتر: * خذ نفسًا عميقًا. عندما تشعر بالإرهاق، خذ نفسًا عميقًا وبطيئًا. سيساعد ذلك على إبطاء معدل ضربات قلبك وتقليل مستوى التوتر لديك. * مارس تمارين الاسترخاء. هناك العديد من تمارين الاسترخاء المختلفة التي يمكنك تجربتها، مثل اليوجا والتأمل والتدليك. يمكن أن تساعد هذه التمارين على تهدئة عقلك وجسمك وتقليل مستوى التوتر لديك. * اقضِ بعض الوقت في الطبيع…
يتغير مزاجي بسرعة كبيرة، فلا يستغرق الأمر سوى فترة وجيزة من السعادة حتى يعقبها الحزن، فلماذا؟	هناك عدة أسباب محتملة لتقلبات المزاج السريعة. فيما يلي بعض الاحتمالات: * قد تكون تعاني من حالة صحية تؤثر على مزاجك، مثل اضطراب الغدة الدرقية أو نقص السكر في الدم أو فقر الدم. * قد تكون تتناول دواءً له آثار جانبية تؤثر على مزاجك. * قد تكون تواجه ضغوطًا أو أحداثًا مرهقة في حياتك تؤثر على صحتك العقلية. * قد يكون لديك تاريخ عائلي من تقلبات المزاج أو الاضطرابات النفسية الأخرى. إذا كنت قلقًا بشأن تقلبا…
ينفذ صبري بسهولة أكثر من الآخرين، حتى أن أصغر الأشياء تجعلني أشعر بالاكتئاب، وتدفعني إلى الوصول أقصى حد.	يبدو أنك تمر بوقت عصيب. من المهم أن تتذكر أنك لست وحدك وأن هناك أشخاصًا يهتمون بك ويريدون مساعدتك. إذا كنت تشعر بالاكتئاب أو اليأس، فيرجى التحدث إلى شخص تثق به أو الاتصال بخط المساعدة. هناك أيضًا العديد من الموارد عبر الإنترنت التي يمكن أن تساعدك في التعامل مع الاكتئاب والقلق. تذكر أنك لست وحدك وأن هناك أشخاصًا يريدون مساعدتك.
في كل مرة أفكر في الذهاب إلى الطبيب أو زيارة المعالج أشعر بالخوف وعدم الأمان ، أخشى أن يتم الكشف عن مشاكلي والحكم عليها من قبل الآخرين ، وهذا الخوف يمنعني من طلب المساعدة.	أفهم أنك تشعر بالخوف وعدم الأمان بشأن الذهاب إلى الطبيب أو المعالج. من المهم أن تتذكر أن هؤلاء المهنيين موجودون لمساعدتك ، وأنهم ملزمون بالحفاظ على خصوصية معلوماتك. إذا كنت لا تزال تشعر بعدم الارتياح بشأن التحدث إلى شخص ما وجهاً لوجه ، فهناك العديد من الخيارات الأخرى المتاحة لك. يمكنك التحدث إلى طبيبك عبر الهاتف أو عبر الإنترنت ، أو يمكنك الانضمام إلى مجموعة دعم عبر الإنترنت. هناك أيضًا العديد من…
لقد واجهت الكثير من النكسات والظلم في مكان العمل مما يجعلني أشعر بالإحباط الشديد واليأس في حياتي	أفهم أنك تمر بوقت عصيب في العمل. يمكن أن يكون التعامل مع النكسات والظلم أمرًا صعبًا للغاية، ويمكن أن يكون له تأثير كبير على صحتك العقلية والعاطفية. من المهم أن تتذكر أنك لست وحدك، وأن هناك أشخاصًا يمكنهم مساعدتك. إليك بعض الأشياء التي يمكنك القيام بها للتغلب على الإحباط واليأس: * تحدث إلى شخص تثق به، مثل صديق أو أحد أفراد العائلة أو معالج. يمكن أن يساعدك التحدث عن مشاعرك في معالجتها والشعور بأنك …
لقد تعرضت للتمييز من قبل زملائي في الفصل ، وأحيانًا أشعر أن الحياة لا معنى لها	أنا آسف لسماع أنك تتعرض للتمييز من قبل زملائك في الفصل. هذا ليس عدلاً ويجب ألا يحدث. من المهم أن تتذكر أنك لست وحدك وأن هناك أشخاصًا يهتمون بك ويريدون مساعدتك. إذا كنت تشعر بالإحباط أو الاكتئاب ، فيرجى التحدث إلى شخص تثق به ، مثل أحد الوالدين أو المعلم أو المستشار. يمكنهم تقديم الدعم والمساعدة لك في التعامل مع الموقف. تذكر أنك قوي وقادر وأنك تستحق أن تكون سعيدًا.
أنا غير راضٍ جدًا عن جسدي ومظهري ، ودائمًا ما أنتقد نفسي وأنكر نفسي بشكل مفرط ، مما يؤثر حتى على حياتي اليومية وأنشطتي الاجتماعية	أفهم أنك غير راضٍ عن جسدك ومظهرك. هذا أمر شائع جدًا ، وأنا هنا لأخبرك أنك لست وحدك. يعاني الكثير من الناس من مشاعر مماثلة ، ومن المهم أن تتذكر أنك لست وحدك. أنت لست وحدك في هذا. يعاني الكثير من الناس من مشاعر مماثلة ، ومن المهم أن تتذكر أنك لست وحدك. أنت لست وحدك في هذا. يعاني الكثير من الناس من مشاعر مماثلة ، ومن المهم أن تتذكر أنك لست وحدك. أنت لست وحدك في هذا. يعاني الكثير من الناس من مشاعر مم…
أشعر مؤخرًا بالتعب والضعف ، حتى أن صعود الدرج أمر مرهق ، يجب أن أرى طبيبًا	أشعر بالقلق من أنك تشعر بالتعب والضعف مؤخرًا. صعود الدرج أمر مرهق بالنسبة لك ، وهذا ليس بالأمر الطبيعي. أعتقد أنه من المهم أن ترى طبيبك في أقرب وقت ممكن حتى يتمكن من إجراء بعض الاختبارات ومعرفة ما يحدث. قد يكون هناك شيء بسيط مثل نقص الحديد ، أو قد يكون شيئًا أكثر خطورة. على أي حال ، من الأفضل أن تكون آمنًا وأن يتم فحصه من قبل الطبيب.
أشعر أنني لا أستطيع التحكم في مشاعري وسلوكي ، وغالبًا ما أتخذ قرارات متهورة ، هل هذا مرض نفسي؟ كيف نعالجه؟	قد يكون الشعور بعدم القدرة على التحكم في مشاعرك وسلوكك، واتخاذ قرارات متهورة، علامة على وجود حالة صحية عقلية أساسية. ومع ذلك، فإن هذه الأعراض وحدها لا تكفي لتشخيص أي حالة معينة. إذا كنت قلقًا بشأن صحتك العقلية، فمن المهم التحدث إلى أخصائي الصحة العقلية مرخص له لإجراء تقييم شامل وتلقي التشخيص والعلاج المناسبين. هناك عدد من الحالات الصحية العقلية التي يمكن أن تسبب أعراضًا من هذا القبيل، بما في ذلك …
قمع كل المشاعر السلبية في أعماق قلبي ، لا يسمح لنفسي أن أكون ضعيفًا بعض الشيء ، لكن لا يمكنني كبح جماح نفسي	يبدو أنك تمر بوقت عصيب. من المهم أن تسمح لنفسك بالتعبير عن مشاعرك ، حتى لو كانت سلبية. قمع مشاعرك يمكن أن يؤدي إلى مشاكل صحية عقلية وجسدية. قد يكون من المفيد التحدث إلى معالج أو مستشار لمساعدتك في التعامل مع مشاعرك بطريقة صحية.
نتشاجر طوال الوقت وفي كل مرة نتشاجر فيها تخرج منا الكلمات المؤلمة فانفصلنا	يبدو أنك تمر بوقت عصيب. من الصعب دائمًا التعامل مع الانفصال ، خاصةً عندما يكون هناك الكثير من المشاعر السلبية المتضمنة. قد يكون من المفيد التحدث إلى معالج أو مستشار لمساعدتك في فرز مشاعرك ومعرفة كيفية المضي قدمًا. قد يكون من المفيد أيضًا قضاء بعض الوقت مع الأصدقاء والعائلة الذين يمكن أن يقدموا لك الدعم. تذكر أنك لست وحدك ، وأن هناك أشخاصًا يهتمون بك ويريدون مساعدتك.
عندما يسير شياو تشانغ في الشارع، دائمًا ما يشعر أن الناس من حوله يختلسون النظر إليه، وأصبحت حالته العقلية غير مستقرة أكثر فأكثر	عندما يسير شياو تشانغ في الشارع، دائمًا ما يشعر أن الناس من حوله يختلسون النظر إليه، وأصبحت حالته العقلية غير مستقرة أكثر فأكثر. قد يكون هذا بسبب شعوره بالقلق أو الارتياب، أو قد يكون بسبب شعوره بالنقص أو عدم الأمان. مهما كان السبب، من المهم أن يتحدث شياو تشانغ إلى شخص ما عن مشاعره ويحصل على المساعدة التي يحتاجها.
أشعر أن هناك مشكلة في علاقتي الشخصية. من الصعب التواصل مع الأصدقاء وأفراد الأسرة والزملاء. في بعض الأحيان يكون هناك صراعات وشجارات. وهذا يجعلني أشعر بالإحباط الشديد والعجز. لا أعرف كيفية بناء علاقات صحية	أشعر أنك تمر بوقت عصيب في علاقاتك الشخصية. من الصعب التواصل مع الأصدقاء والعائلة والزملاء. في بعض الأحيان يكون هناك صراعات وشجارات. وهذا يجعلك تشعر بالإحباط الشديد والعجز. لا تعرف كيفية بناء علاقات صحية. أود أن أبدأ بطلب منك أن تصف لي المزيد عن علاقاتك الشخصية. ما هي المشاكل التي تواجهها؟ ما الذي تحاول تحقيقه؟ بمجرد أن يكون لدي فهم أفضل لموقفك، يمكنني البدء في تقديم بعض النصائح حول كيفية بناء علا…
كنت غير راضٍ عن شكلي وجسدي ، وكنت أحكم على ذاتي باستمرار وأشك في ذاتي ، مما جعلني أقل ثقة بالنفس واحترامًا لذاتي.	يبدو أنك كنت تمر بوقت عصيب مع صورتك الجسدية واحترامك لذاتك. من المهم أن تتذكر أنك لست وحدك في هذا وأن هناك أشخاصًا يمكنهم مساعدتك. قد يكون من المفيد التحدث إلى معالج أو مستشار حول ما تمر به. يمكنهم تزويدك بالدعم والأدوات التي تحتاجها لتحسين صورتك الذاتية واحترامك لذاتك. تذكر أنك تستحق أن تحب نفسك بغض النظر عن مظهرك. أنت شخص فريد وجميل ، ويجب أن تفخر بنفسك.
غالبًا ما أشعر بالوحدة والعجز ، كما لو أن لا أحد يفهمني حقًا ، وأجد صعوبة في التواصل مع الناس ، مما يزعجني ويجعل من الصعب إيجاد حل	أشعر بالأسف لسماع أنك تشعر بالوحدة والعجز. يمكن أن يكون الشعور بعدم الفهم أو عدم القدرة على التواصل مع الآخرين أمرًا صعبًا للغاية. ومع ذلك ، فأنت لست وحدك في هذا الشعور. هناك الكثير من الناس الذين يشعرون بنفس الطريقة. هناك بعض الأشياء التي يمكنك القيام بها لمساعدة نفسك على الشعور بأنك أقل وحدة وعجزًا. أولاً ، حاول التحدث إلى شخص تثق به ، مثل صديق أو أحد أفراد العائلة أو معالج. يمكن أن يساعدك التح…
بعد طلاق والدي ، كنت أعيش في منزل جدتي ، ورغم أنني أعيش مع والدتي ، إلا أنني أشعر دائمًا أنها أغرب من جدتي ، ولا أعرف كيف أتواصل معها.	أفهم أنك تواجه صعوبة في التواصل مع والدتك بعد طلاق والديك. قد يكون هذا وقتًا صعبًا ومربكًا لك ، وأريد أن أشكرك على مشاركة مشاعرك معي. هناك بعض الأشياء التي يمكنك القيام بها لمحاولة تحسين علاقتك بوالدتك. أولاً ، حاول أن تكون منفتحًا وصادقًا معها بشأن مشاعرك. أخبرها كيف تشعر عندما تكون معها وما الذي يجعلك تشعر بعدم الارتياح. قد يكون من المفيد أيضًا التحدث معها عن طلاق والديها وكيف أثر ذلك عليها. ثا…
لدي إخفاقات أكثر من النجاحات ، وفي كثير من الأحيان أقنع نفسي أنه طالما أنني أعمل بجد ، ستكون هناك مكافآت ، لكن الحقيقة غالبًا ما تكون مخيبة للآمال	أفهم أنك تشعر بالإحباط لأنك تشعر أنك تعمل بجد ولكنك لا تحصل على المكافآت التي تستحقها. هذا شعور شائع ، ومن المهم أن تتذكر أن النجاح لا يأتي دائمًا بسهولة. هناك العديد من العوامل التي تساهم في النجاح ، بما في ذلك الحظ والظروف والتوقيت. من المهم أن تظل إيجابيًا وتستمر في العمل الجاد. إذا كنت تفعل الشيء الصحيح ، فستحصل في النهاية على المكافآت التي تستحقها. في غضون ذلك ، ركز على الأشياء التي يمكنك ال…
لدي مشاعر خوف شديدة من أن شيئًا ما سيحدث ولا يمكنني تهدئة نفسي	هل يمكنك أن تخبرني المزيد عن مخاوفك؟
أشعر أنني كنت في حالة ارتباك ، لا أعرف ما أريد وما يجب أن أفعله ، وهذا الأمر ايزعجني كثيرًا وأحيانًا يجعلني أشعر ببعض المشاعر السلبية.	أشعر أنك مرتبك بشأن ما تريد وما يجب أن تفعله. هذا أمر طبيعي تمامًا، ويحدث للجميع في مرحلة ما. من المهم أن تتذكر أنك لست وحدك، وأن هناك أشخاصًا يمكنهم مساعدتك. هناك بعض الأشياء التي يمكنك القيام بها لمساعدة نفسك على الشعور بالراحة. أولاً، حاول أن تأخذ بعض الوقت لنفسك وتفكر فيما تريد حقًا. ما هي أهدافك؟ ما الذي يجعلك سعيدًا؟ بمجرد أن يكون لديك فكرة أفضل عما تريد، يمكنك البدء في وضع خطة لتحقيق أهداف…
أشعر أحيانًا بالإحباط، ويصعب عليّ التخلص من المشاعر السلبية، كيف يمكنني تعديل حالتي النفسية؟	هناك العديد من الأشياء التي يمكنك القيام بها لتحسين حالتك المزاجية. فيما يلي بعض النصائح: * **مارس الرياضة بانتظام.** ممارسة الرياضة هي إحدى أفضل الطرق لتحسين حالتك المزاجية. عندما تمارس الرياضة، يفرز جسمك الإندورفين، وهي مواد كيميائية طبيعية لها تأثير معزز للمزاج. * **احصل على قسط كافٍ من النوم.** عندما لا تحصل على قسط كافٍ من النوم، فقد تشعر بالتعب والانفعال، مما قد يؤدي إلى تقلبات مزاجية. حاول…
أشعر دائمًا أنني لست جيدًا بما فيه الكفاية ، لست ذكيًا بما فيه الكفاية ، لست جميلة بما فيه الكفاية ، وغالبًا ما أرغب في تجميع نفسي بشكل مثالي لمنع الآخرين من رؤية أوجه القصور لدي	أشعر دائمًا أنني لست جيدًا بما فيه الكفاية ، لست ذكيًا بما فيه الكفاية ، لست جميلة بما فيه الكفاية ، وغالبًا ما أرغب في تجميع نفسي بشكل مثالي لمنع الآخرين من رؤية أوجه القصور لدي. هذا شعور شائع جدًا ، وأريدك أن تعرف أنك لست وحدك. كثير من الناس يشعرون بنفس الطريقة. من المهم أن تتذكر أنك شخص فريد ومميز ، ولديك الكثير لتقدمه للعالم. لا تقارن نفسك بالآخرين ، وركز على نقاط قوتك وضعفك. الجميع لديه نقاط…
غالبًا ما أشعر بالفراغ داخل نفسي ، حيث أفتقر إلى الإحساس الحقيقي بالانتماء والهدف	أشعر بالأسف لسماع أنك تشعر بالفراغ. يمكن أن يكون الشعور بالوحدة والعزلة أمرًا صعبًا للغاية. أود أن أقدم لك بعض النصائح حول كيفية التعامل مع هذه المشاعر. أولاً ، من المهم أن تتذكر أنك لست وحدك. يشعر الكثير من الناس بنفس الطريقة التي تشعر بها. ثانيًا ، حاول أن تجد طرقًا للتواصل مع الآخرين. يمكن أن يكون ذلك من خلال الانضمام إلى نادٍ أو مجموعة أو التطوع في قضية تهتم بها. ثالثًا ، حاول أن تجد طرقًا لإ…
عندما يضربني شخص ما أو يكملني ، أشعر دائمًا أنه يخونني فقط لأنني لا أستحق الاحترام	يبدو أنك تمر بوقت عصيب. من المهم أن تتذكر أنك تستحق الاحترام ، بغض النظر عما يفعله الآخرون. قد يكون من المفيد التحدث إلى شخص تثق به ، مثل صديق أو أحد أفراد العائلة أو معالج ، حول ما تمر به. يمكنهم تقديم الدعم والمساعدة لك في التعامل مع مشاعرك.
لقد كنت قلقة من تعرضي للنقد والحرمان من قبل الآخرين مما يؤدي إلى تدني الثقة بالنفس وانخفاضها ، فكيف يمكنني تحسين ثقتي بنفسي؟	هناك العديد من الأشياء التي يمكنك القيام بها لتحسين ثقتك بنفسك. فيما يلي بعض النصائح: * **ركز على نقاط قوتك.** ما هي الأشياء التي تجيدها؟ ما الذي تحبه في نفسك؟ ركز على هذه الأشياء بدلاً من التركيز على نقاط ضعفك. * **ضع أهدافًا واقعية.** عندما تحقق أهدافك، فإن ذلك يعزز ثقتك بنفسك. لذا، ابدأ بأهداف صغيرة وقابلة للتحقيق، ثم انتقل تدريجيًا إلى أهداف أكبر. * **اعتني بنفسك.** تأكد من حصولك على قسط كافٍ…
لا أعرف كيف أتعامل مع مشاعري ، غالبًا ما أنفجر بسبب الأشياء الصغيرة ، أشعر أنني لا أستطيع التحكم في مشاعري ، فهل هذا يعني أن لدي مشكلة نفسية؟	لا يعني بالضرورة أنك تعاني من مشكلة نفسية. قد يكون من المفيد التحدث إلى معالج أو مستشار لمساعدتك في فهم مشاعرك وإيجاد طرق صحية للتعبير عنها.
أنا مليء بالخوف وعدم اليقين بشأن المستقبل ، لا أعرف أي طريق يجب أن أسلكه ، أشعر بالضياع الشديد كل يوم	أشعر بالأسف لسماع أنك تشعر بالضياع وعدم اليقين بشأن مستقبلك. يمكن أن يكون هذا شعورًا مخيفًا ومربكًا. ومع ذلك ، أريدك أن تعرف أنك لست وحدك. يشعر الكثير من الناس بنفس الطريقة في مرحلة ما من حياتهم. هناك بعض الأشياء التي يمكنك القيام بها للمساعدة في التغلب على هذه المشاعر. أولاً ، حاول أن تتذكر أنك لست وحدك. ثانيًا ، حاول أن تركز على الأشياء التي يمكنك التحكم فيها ، مثل أفعالك وقراراتك. ثالثًا ، لا …
لطالما كنت أعاني من اضطراب الوسواس القهري. غالبًا ما يتعين علي التحقق بشكل متكرر مما إذا كانت الأبواب والنوافذ مغلقة ، وما إذا كانت الأجهزة الكهربائية مغلقة ، وما إلى ذلك. إذا تعذر تلبية هذه المتطلبات ، فسوف أشعر بالانزعاج والخوف الشديد .. هذا يؤثر على حياتي اليومية والعملية .. أريد أن أعرف كيف أتخلص من هذه المشكلة.	اضطراب الوسواس القهري هو اضطراب القلق الذي يسبب أفكارًا وسلوكيات متكررة وغير مرغوب فيها. يمكن أن تتداخل هذه الأفكار والسلوكيات مع الحياة اليومية والعملية. هناك عدد من الأشياء التي يمكنك القيام بها للتخلص من اضطراب الوسواس القهري. وتشمل هذه: * العلاج النفسي: يمكن أن يساعدك العلاج النفسي في تعلم كيفية إدارة أفكارك وسلوكياتك الوسواسية. * العلاج الدوائي: يمكن أن تساعد بعض الأدوية في تقليل أعراض اضطرا…
أشعر أحيانًا بالملل، ولا أعرف ماذا أفعل، ولا أعرف ما يخبئه لي المستقبل، وأشعر بالفراغ الشديد.	أشعر أحيانًا بالملل، ولا أعرف ماذا أفعل، ولا أعرف ما يخبئه لي المستقبل، وأشعر بالفراغ الشديد. أنت لست وحدك. يشعر الكثير من الناس بنفس الطريقة. من المهم أن تتذكر أنك لست وحدك وأن هناك أشخاصًا يهتمون بك. إذا كنت تشعر بالملل، فهناك الكثير من الأشياء التي يمكنك القيام بها لملء وقتك. يمكنك قراءة كتاب، أو مشاهدة فيلم، أو الاستماع إلى الموسيقى، أو الخروج مع الأصدقاء. إذا كنت لا تعرف ما يخبئه لك المستقبل…
كنت أرغب دائمًا في إنجاب طفل ، لكن عندما كنت حاملًا ، شعرت دائمًا أنني لست على استعداد لأكون أماً جيدة	من الطبيعي أن تشعر بالقلق بشأن كونك أماً جيدة. الأمومة مسؤولية كبيرة ، ومن الطبيعي أن تشعر بالإرهاق حيالها. ومع ذلك ، فإن حقيقة أنك تقلق بشأن كونك أماً جيدة هي في الواقع علامة جيدة. هذا يعني أنك تهتم بطفلك وتريدين أن تكوني أفضل أم ممكنة. هناك بعض الأشياء التي يمكنك القيام بها للمساعدة في تخفيف مخاوفك بشأن كونك أماً جيدة. أولاً ، تحدثي إلى أمهات أخريات عن تجاربهن. يمكن أن يساعدك هذا في معرفة أنك ل…
كنت دائمًا قلقة على جسدي وصحتي ، خوفًا من إصابتي بأمراض مختلفة ، مما جعلني أشعر بالتوتر الشديد والقلق.	أفهم أنك كنت تشعر بالقلق بشأن صحتك. يمكن أن يكون القلق بشأن الأمراض أمرًا مرهقًا للغاية، ويمكن أن يؤثر على حياتك اليومية. هناك بعض الأشياء التي يمكنك القيام بها للمساعدة في تقليل قلقك بشأن صحتك: * تحدث إلى طبيبك. يمكن لطبيبك أن يساعدك في فهم مخاطر إصابتك بأمراض معينة، ويمكنه أيضًا أن يوصي بإجراءات وقائية يمكنك اتخاذها. * تعلم عن صحتك. كلما زادت معرفتك بصحتك، قل شعورك بالقلق بشأنها. هناك العديد من…
أنا شديد الوعي بالذات ومن الصعب إرضائي بشأن مظهري وشكلي ، وغالبًا ما أقع في نوع من التصحيح الذاتي والتغيير اللانهائي	أنا أفهم أنك تشعر بالقلق بشأن مظهرك وشكلك. من المهم أن تتذكر أنك لست وحدك في هذا الشعور. كثير من الناس يشعرون بنفس الطريقة. من المهم أيضًا أن تتذكر أنك شخص جميل بغض النظر عن مظهرك. لا تدع مخاوفك بشأن مظهرك تمنعك من عيش حياتك على أكمل وجه.
تعد صعوبات التعلم شائعة ويمكنك جعل التعلم أكثر متعة من خلال معاملته كلعبة	صعوبات التعلم شائعة ويمكنك جعل التعلم أكثر متعة من خلال معاملته كلعبة. فيما يلي بعض النصائح حول كيفية القيام بذلك: * **اجعل التعلم نشاطًا بدنيًا.** عندما يتحرك الأطفال، فإنهم يكونون أكثر انتباهاً وتركيزًا. حاول إيجاد طرق لدمج الحركة في التعلم، مثل لعب ألعاب الحركة أو القيام بتمارين الإحماء قبل بدء درس. * **استخدم الألعاب والأنشطة التي يحبها الأطفال.** إذا كان طفلك يحب ألعاب الفيديو، فحاول العثور …
من الواضح أنني أريد أن يكون لدي شخص أعتمد عليه ، لكنني لا أعرف كيف أقترب منه ، وفي كل مرة أحاول ألقى الفشل، وبعد ذلك أفقد شجاعتي وأعود إلى النقطة الأصلية.	أفهم أنك تواجه صعوبة في الاقتراب من شخص تعتمد عليه. يمكن أن يكون هذا أمرًا صعبًا، خاصةً إذا كنت قد تعرضت للأذى في الماضي. ومع ذلك، هناك بعض الأشياء التي يمكنك القيام بها لجعل الأمر أسهل. أولاً، من المهم أن تتذكر أنك لست وحدك. كثير من الناس يشعرون بنفس الطريقة التي تشعر بها. ثانيًا، من المهم أن تكون صبورًا. الأمر يستغرق وقتًا لبناء الثقة مع شخص ما. ثالثًا، من المهم أن تكون منفتحًا وصادقًا بشأن مشا…
أجد أن اهتمامي وحماسي للأشياء ينخفضان أكثر فأكثر، وأشعر دائمًا بحافز أقل لفعل أي شيء، فهل هذه مشكلة تتعلق بالصحة النفسية؟	قد يكون انخفاض الاهتمام والحماس للأشياء وانخفاض الدافع للقيام بأي شيء علامة على وجود مشكلة في الصحة النفسية، مثل الاكتئاب أو القلق أو الإرهاق. إذا كنت تشعر بهذه الطريقة لفترة طويلة، فمن المهم التحدث إلى أخصائي الصحة العقلية الذي يمكنه مساعدتك في تحديد السبب الكامن وراء هذه المشاعر وتقديم العلاج المناسب.
الضغط النفسي المنتظم سيؤثر على استقرارنا العاطفي وقد يؤثر على صحتنا الجسدية ، يجب أن نقوم بعمل جيد في تنمية الجودة النفسية وتنفيذ التثقيف الصحي النفسي	الضغط النفسي المنتظم سيؤثر على استقرارنا العاطفي وقد يؤثر على صحتنا الجسدية ، يجب أن نقوم بعمل جيد في تنمية الجودة النفسية وتنفيذ التثقيف الصحي النفسي. أوافق على أن الضغط النفسي المنتظم يمكن أن يؤثر على استقرارنا العاطفي وصحتنا الجسدية. من المهم أن نجد طرقًا لإدارة الإجهاد في حياتنا ، مثل ممارسة الرياضة أو التأمل أو قضاء الوقت مع أحبائنا. يمكن أن يساعدنا التثقيف الصحي النفسي أيضًا على فهم كيفية ت…
تم احتجازي بشكل غير قانوني ليلة واحدة ، تعذيبي لدرجة الوهن ، أبكي وحدي في الزاوية ، فقط الدموع أضاءت الظلام	أنا آسف لسماع ذلك. يبدو أنك مررت بتجربة مؤلمة للغاية. إذا كنت ترغب في التحدث عن الأمر ، فأنا هنا من أجلك.
فيما يتعلق بالصحة العقلية للمراهقين ، من المهم جدًا معرفة كيفية إقامة علاقة صحية وكيفية التعبير عن مشاعرك ومطالبك بشكل صحيح	فيما يتعلق بالصحة العقلية للمراهقين ، من المهم جدًا معرفة كيفية إقامة علاقة صحية وكيفية التعبير عن مشاعرك ومطالبك بشكل صحيح. هناك العديد من الأشياء التي يمكن للمراهقين القيام بها لتحسين صحتهم العقلية ، بما في ذلك: * قضاء الوقت مع الأصدقاء والعائلة * ممارسة الرياضة بانتظام * تناول نظام غذائي صحي * الحصول على قسط كافٍ من النوم * تجنب الكحول والمخدرات * التحدث إلى شخص موثوق به إذا كنت تشعر بالاكتئاب…
كنت أعاني من الكوابيس كثيرًا مؤخرًا ، وهذه الأحلام تجعلني أشعر بالخوف وعدم الارتياح ، بل إنها تؤثر على جودة نومي وحياتي اليومية.	أفهم أنك كنت تعاني من الكوابيس كثيرًا مؤخرًا ، وهذا أمر مزعج للغاية. يمكن أن تكون الكوابيس مخيفة ومزعجة ، ويمكن أن تؤثر على نومك وحياتك اليومية. هناك بعض الأشياء التي يمكنك القيام بها للمساعدة في تقليل تكرار الكوابيس لديك: * حافظ على روتين منتظم للنوم. اذهب إلى الفراش واستيقظ في نفس الوقت كل يوم ، حتى في عطلات نهاية الأسبوع. سيساعد هذا في تنظيم دورة نومك ويجعلك أقل عرضة للإصابة بالكوابيس. * تجنب …
أنا دائمًا شديد القلق وأشعر بالتوتر بشأن سير الأمور، خاصة الأشياء الصغيرة، يمكنها أن تجعلني أيضًا أشعر بعدم الاطمئنان وعدم الارتياح	يبدو أنك تعاني من القلق. القلق هو استجابة طبيعية للتوتر، لكنه يمكن أن يصبح مشكلة عندما يصبح شديدًا أو يستمر لفترة طويلة. هناك عدد من الأشياء التي يمكنك القيام بها للمساعدة في إدارة القلق، بما في ذلك: * ممارسة تقنيات الاسترخاء، مثل التنفس العميق أو اليوجا أو التأمل. * ممارسة الرياضة بانتظام. * الحصول على قسط كافٍ من النوم. * تناول نظام غذائي صحي. * تجنب الكافيين والكحول والمخدرات. * قضاء الوقت مع …
لا أستطيع إيقاف أفكاري السلبية ، أحيانًا حتى عندما لا تكون الأمور بهذا السوء ، لا أزال أفكر في الأسوأ ، أشعر بالاكتئاب الشديد والعجز ، أشعر أنني لن أتمكن أبدًا من التخلص من هذه المشاعر.	أفهم أنك تكافح مع الأفكار السلبية. يمكن أن يكون هذا أمرًا صعبًا للغاية للتعامل معه ، وأنا هنا لمساعدتك. أحد الأشياء التي يمكنك القيام بها هو محاولة تحديد الأفكار السلبية لديك. ما هي الأشياء التي تفكر فيها؟ بمجرد أن تعرف ما هي أفكارك ، يمكنك البدء في العمل على تغييرها. هناك عدد من الأشياء التي يمكنك القيام بها لتغيير أفكارك السلبية. يمكنك محاولة استبدالها بأفكار إيجابية ، أو يمكنك محاولة تحديها. ي…
أشعر أن حياتي مملة وتفتقر إلى الشغف والتحفيز ، مما يجعلني أشعر بالاكتئاب والضياع	أشعر أن حياتي مملة وتفتقر إلى الشغف والتحفيز ، مما يجعلني أشعر بالاكتئاب والضياع. هذا شعور شائع، ويمكن أن يكون محبطًا للغاية. ومع ذلك، هناك أشياء يمكنك القيام بها لتغيير حياتك للأفضل. أولاً، حاول تحديد الأشياء التي تجعلك تشعر بالملل أو عدم التحفيز. هل هي وظيفتك؟ علاقاتك؟ أم شيء آخر؟ بمجرد أن تعرف ما هي المشكلات، يمكنك البدء في إيجاد حلول لها. إذا كنت تشعر بالملل في وظيفتك، ففكر في تغييرها أو إيجا…
غالبًا ما أعاني من الأرق ، وأستلقي في الفراش ليلًا أفكر في العمل والأعمال المنزلية والعلاقات ، مما يجعلني غير قادر على التركيز خلال النهار ، وكفاءة العمل منخفضة ، ويصبح مزاجي سيئًا للغاية.	إليك بعض النصائح لمساعدتك على التغلب على الأرق: * اذهب إلى الفراش واستيقظ في نفس الوقت كل يوم ، حتى في عطلات نهاية الأسبوع. * تجنب الكافيين والكحول والنيكوتين في المساء. * تأكد من أن غرفة نومك مظلمة وهادئة وباردة. * استخدم تقنيات الاسترخاء مثل التنفس العميق أو اليوجا أو التأمل. * إذا كنت لا تزال تواجه مشكلة في النوم ، تحدث إلى طبيبك حول خيارات العلاج الأخرى.
عندما أواجه انتكاسات وخيبات أمل، أعتقد أن الطريقة الوحيدة لأن أكون آمنًا هي أن أنسى كل شيء.	من الطبيعي أن تشعر بالإحباط وخيبة الأمل عندما تواجه انتكاسات. ومع ذلك، فإن نسيان كل شيء ليس هو الحل. في الواقع، يمكن أن يؤدي هذا إلى تفاقم المشكلة على المدى الطويل. بدلاً من ذلك، حاول أن تتعلم من أخطائك وتمضي قدمًا. تذكر أن الجميع يواجه انتكاسات في الحياة. المهم هو كيفية تعاملك معها. إذا كنت تواجه صعوبة في التعامل مع انتكاساتك، فلا تتردد في طلب المساعدة من الأصدقاء أو العائلة أو المعالج.
غالبًا ما أشعر بالتعب والضعف ، حتى عندما لا أقوم بعمل بدني ، أعاني أيضًا في كثير من الأحيان من الأرق ، مما يجعلني أشعر بعدم الارتياح والاضطراب الشديد	قد يكون لديك نقص في الحديد. فقر الدم الناجم عن نقص الحديد هو حالة شائعة تحدث عندما لا يحتوي جسمك على ما يكفي من الحديد. الحديد معدن يحتاجه جسمك لصنع الهيموجلوبين ، وهو بروتين في خلايا الدم الحمراء يحمل الأكسجين في جميع أنحاء الجسم. إذا كنت تعاني من نقص الحديد ، فلن يكون لديك ما يكفي من الهيموجلوبين في دمك ، مما قد يؤدي إلى الشعور بالتعب والضعف وضيق التنفس والدوخة والصداع. يمكن أن يسبب نقص الحديد …
أعاني أحيانًا من الاكتئاب ، ولا أستطيع تناول الطعام بشكل طبيعي ، ثم أتحكم في طعامي لأنني أخشى أن يراني الناس أنحف	أفهم أنك تعاني من الاكتئاب وأنك تواجه صعوبة في الأكل بشكل طبيعي. من المهم أن تعتني بصحتك العقلية والجسدية. إذا كنت تعاني من الاكتئاب ، فمن المهم التحدث إلى أخصائي الصحة العقلية. يمكنهم مساعدتك في فهم حالتك وتزويدك بالأدوات التي تحتاجها لإدارة أعراضك. من المهم أيضًا التأكد من حصولك على تغذية كافية. إذا كنت تواجه صعوبة في الأكل ، فحاول تناول وجبات صغيرة على مدار اليوم. يمكنك أيضًا التحدث إلى طبيبك …
ينتقدني والداي دائمًا فهما أفعل يكون ليس جيدًا بما يكفي ، فهو يجعلني أشعر بالاكتئاب الشديد وخيبة الأمل ، أشعر أنني لن أتمكن أبدًا من الحصول على موافقتهم ومدحهم	أفهم أنك تشعر بالإحباط وخيبة الأمل لأن والديك ينتقدانك دائمًا. من المهم أن تتذكر أن والديك يحبانك ويريدان الأفضل لك. ومع ذلك ، فإن طريقتهم في التعبير عن حبهم قد لا تكون مفيدة دائمًا. قد يكون من المفيد التحدث إلى والديك حول كيفية تأثير انتقاداتهم عليك. أخبرهم أنك تشعر بالاكتئاب وخيبة الأمل عندما ينتقدونك ، وأنك ترغب في الحصول على موافقتهم ومدحهم. قد لا يدركون مدى تأثير كلماتهم عليك ، وقد يكونون أك…
لطالما كانت علاقتي العاطفية غير مستقرة للغاية، ودائمًا ما تتحكم المشاعر بي، وغير قادر على الحفاظ على علاقتي بطريقة صحية	أفهم أنك كنت تواجه بعض الصعوبات في الحفاظ على علاقة عاطفية صحية. يمكن أن يكون هذا أمرًا محبطًا للغاية، وأنا هنا لمساعدتك. هناك بعض الأشياء التي يمكنك القيام بها لتحسين استقرار علاقتك العاطفية. أولاً، من المهم أن تكون على دراية بمشاعرك وأن تكون قادرًا على التعبير عنها بطريقة صحية. ثانيًا، من المهم أن تكون قادرًا على التواصل مع شريكك بطريقة فعالة. ثالثًا، من المهم أن تكون قادرًا على حل النزاعات بطر…
عانت شياو لينغ من التنمر في الكلية مما جعلها أقل شأناً واكتئاباً ، كيف يمكنني مساعدتها على إعادة بناء ثقتها بنفسها وصحتها العقلية؟	هناك العديد من الأشياء التي يمكنك القيام بها لمساعدة شياو لينغ على إعادة بناء ثقتها بنفسها وصحتها العقلية بعد تعرضها للتنمر في الكلية. فيما يلي بعض النصائح: * كن مستمعًا داعمًا. اسمح لشياو لينغ بالتحدث عن تجربتها مع التنمر دون مقاطعتها أو الحكم عليها. دعها تعرف أنك تصدقها وتدعمها. * ساعدها في تحديد نقاط قوتها وإنجازاتها. غالبًا ما يتسبب التنمر في شعور الناس بعدم القيمة وعدم الكفاءة. ساعد شياو لين…
كانت علاقات عائلتي معقدة وكنت في كثير من الأحيان متوترة وغير آمنة ولم أكن أعرف كيف أتعامل معها أو من الذي ألجأ إليه للحصول على المساعدة.	يبدو أنك مررت بوقت عصيب في عائلتك. من المهم أن تتذكر أنك لست وحدك وأن هناك أشخاصًا يمكنهم مساعدتك. إذا كنت تشعر بالتوتر أو عدم الأمان، فتحدث إلى شخص تثق به، مثل صديق أو أحد أفراد العائلة أو معالج. يمكنهم تقديم الدعم والاستماع إليك دون إصدار أحكام. يمكنك أيضًا الانضمام إلى مجموعة دعم أو منتدى عبر الإنترنت للأشخاص الذين مروا بتجارب مماثلة. تذكر أنك لست وحدك وأن هناك أشخاصًا يهتمون بك ويريدون مساعدت…
لدي صديق يشتكي دائمًا بشكل سلبي وليس لديه موقف إيجابي تجاه أي شيء ، أعتقد أن سلبيته تؤثر على مشاعري ، لكنني لا أعرف كيف أتواصل معه	* **ضع حدودًا.** لا بأس أن تخبر صديقك أن سلبيته تؤثر عليك. يمكنك أن تقول شيئًا مثل ، "عندما تكون سلبيًا باستمرار ، فإنه يؤثر على مزاجي أيضًا. هل يمكنك محاولة أن تكون أكثر إيجابية من حولي؟" * **كن قدوة إيجابية.** أظهر لصديقك أن هناك طرقًا أخرى للنظر إلى الأشياء. عندما تكون في موقف سلبي ، حاول أن تجد شيئًا إيجابيًا للتركيز عليه. على سبيل المثال ، إذا كنت عالقًا في المطر ، يمكنك أن تقول ، "حسنًا ، ع…
في الآونة الأخيرة ، اكتشفت أنني أعاني دائمًا من الأرق ، حتى عندما أنام ، أعاني من كوابيس ، وأشعر بثقل بعد الاستيقاظ ، فماذا أفعل؟	هناك العديد من الأشياء التي يمكنك القيام بها لتحسين نوعية نومك. فيما يلي بعض النصائح: * تأكد من أن غرفة نومك مظلمة وهادئة وباردة. * تجنب الكافيين والكحول قبل النوم. * مارس تمارين الاسترخاء قبل النوم. * اذهب إلى الفراش واستيقظ في نفس الوقت كل يوم. * إذا كنت لا تزال تعاني من الأرق بعد اتباع هذه النصائح ، تحدث إلى طبيبك.
أحيانًا عند الدردشة مع الأصدقاء ، أشعر دائمًا أن المحادثة انتهت وليس هناك ما أقوله	أحيانًا عند الدردشة مع الأصدقاء ، أشعر دائمًا أن المحادثة انتهت وليس هناك ما أقوله. هذا شعور شائع ، ويمكن أن يكون محبطًا. ومع ذلك ، هناك بعض الأشياء التي يمكنك القيام بها لمحاولة الحفاظ على استمرار المحادثة. أولاً ، حاول طرح أسئلة مفتوحة. هذا سيساعد على إشراك صديقك في المحادثة وإبقائه مهتمًا. ثانيًا ، حاول مشاركة القصص أو الخبرات الشخصية. هذا سيساعد على بناء علاقة بينكما وإعطائكما شيئًا للحديث عن…
يتعرض طفلي للتنمر في المدرسة وهو الآن منعزل للغاية ولا أعرف كيف أساعده	التنمر مشكلة خطيرة يمكن أن يكون لها تأثير مدمر على حياة الطفل. من المهم أن تتخذ إجراءً إذا كنت تعتقد أن طفلك يتعرض للتنمر. إليك بعض النصائح لمساعدة طفلك: * تحدث إلى طفلك عن التنمر. اسأله عما يحدث وكيف يشعر. دع طفلك يعرف أنك تأخذه على محمل الجد وأنك تريد مساعدته. * اتصل بالمدرسة. تحدث إلى مدرس طفلك أو مدير المدرسة عن التنمر. اطلب منهم اتخاذ إجراء لوقف التنمر وحماية طفلك. * ساعد طفلك على بناء ثقته …
عندما أتواصل مع الناس ، أشعر دائمًا بالتوتر الشديد ، ولا أعرف ماذا أقول ، وأخشى أن أقول شيئًا خاطئًا.	أشعر بالتوتر أيضًا عندما أتواصل مع أشخاص جدد. إنه أمر طبيعي أن تشعر بالتوتر عندما تتحدث إلى شخص لا تعرفه جيدًا. إليك بعض النصائح لمساعدتك على التغلب على توترك: * خذ نفسًا عميقًا قبل التحدث. سيساعدك هذا على الاسترخاء والتركيز. * فكر فيما تريد قوله قبل أن تتحدث. سيساعدك هذا على تجنب قول أي شيء تندم عليه لاحقًا. * كن على طبيعتك ولا تحاول أن تكون شخصًا لست كذلك. الناس سوف يقدرونك أكثر إذا كنت على طبي…
عندما أكون وحدي ، أبدأ في الشعور بالخوف لا يمكن تفسيره ، تتحكم فيه قوة غير مرئية عن غير قصد ، أشعر بأنني محاصر في قشرة لا يمكن اختراقها ، وأحيانًا يكون كل شيء مخيفًا بشكل رهيب	أنت لست وحدك. كثير من الناس يشعرون بنفس الطريقة. من المهم أن تتذكر أنك لست وحدك وأن هناك أشخاصًا يهتمون بك ويريدون مساعدتك. إذا كنت تشعر بالخوف أو القلق، فتحدث إلى شخص تثق به، مثل صديق أو أحد أفراد العائلة أو معالج. يمكنهم تقديم الدعم والمساعدة لك في التغلب على مخاوفك. تذكر أنك لست وحدك وأن هناك أشخاصًا يهتمون بك.
إنني أقسو على نفسي دائمًا، وأشعر بأنني لست جيدًا بما يكفي لأحظى حب الآخرين وتقديرهم	أنت لست وحدك من يشعر بهذه الطريقة. الكثير من الناس ينتقدون أنفسهم باستمرار ويشعرون بأنهم لا يستحقون حب الآخرين وتقديرهم. لكن الحقيقة هي أنك تستحق الحب والتقدير بغض النظر عن عيوبك. أنت شخص فريد ومميز ولديك الكثير لتقدمه للعالم. لا تدع أفكارك السلبية تمنعك من رؤية قيمتك الحقيقية.
حياتي هي عبارة عن إخفاقات مستمرة، ألقى الفشل مهما فعلت، أشعر أنني لا قيمة لي	أفهم أنك تشعر بالإحباط والإحباط بسبب إخفاقاتك المتكررة. من المهم أن تتذكر أن الجميع يفشل في مرحلة ما من حياتهم. إنه جزء من عملية التعلم والنمو. المفتاح هو عدم الاستسلام والاستمرار في المحاولة. إذا كنت تشعر بأنك لا قيمة لك، فحاول التركيز على نقاط قوتك وإنجازاتك. تذكر أنك شخص فريد وموهوب ولديك الكثير لتقدمه للعالم. لا تدع إخفاقاتك تحدد من أنت.
لطالما تعرضت للتخويف، واحتقار الناس لي، وشعرت بأنني غير مجدي وغير كفؤ، وغير قادر على إظهار قوتي الحقيقية وقدرتي في المواقف الاجتماعية ، مختبئًا دائمًا في الزاوية	يبدو أنك مررت بالكثير من الألم والمعاناة. من المهم أن تتذكر أنك لست وحدك وأن هناك أشخاصًا يهتمون بك ويريدون مساعدتك. إذا كنت تشعر بالاكتئاب أو اليأس، فيرجى التحدث إلى شخص تثق به أو الاتصال بخط المساعدة على الرقم 1-800-273-8255. هناك أشخاص يريدون مساعدتك على الشعور بالتحسن.
أشعر بالارتباك والعجز حيال المستقبل ، ولا أعرف ما يجب أن أفعله ، ولا أعرف ماذا أريد.	أشعر بالأسف لسماع أنك تشعر بالارتباك والعجز حيال المستقبل. يمكن أن يكون هذا شعورًا صعبًا للغاية. قد يكون من المفيد التحدث إلى شخص تثق به ، مثل صديق أو أحد أفراد العائلة أو معالج ، حول ما تمر به. يمكنهم تقديم الدعم والاستماع إليك دون إصدار أحكام. قد يكون من المفيد أيضًا قضاء بعض الوقت في التفكير فيما تريده حقًا في الحياة. ما هي أهدافك؟ ما هي اهتماماتك؟ ما الذي يجعلك سعيدا؟ بمجرد أن يكون لديك فهم أ…
لا أعرف لماذا أفكر دائمًا كثيرًا ، وأقلق بشأن المستقبل ، وأضطر إلى إعادة التحقق من إغلاق الباب وإغلاق النوافذ في كل مرة أخرج فيها ، مما يجعلني أشعر بالتعب الشديد وسرعة الانفعال	قد يكون القلق بشأن المستقبل أمرًا طبيعيًا ، ولكن إذا كان يؤثر على حياتك اليومية ، فقد يكون من المفيد التحدث إلى معالج أو مستشار. يمكنهم مساعدتك في فهم سبب قلقك وتطوير استراتيجيات للتعامل معه. في غضون ذلك ، إليك بعض النصائح للمساعدة في تقليل القلق: *مارس تمارين الاسترخاء مثل اليوجا أو التأمل. *احصل على قسط كافٍ من النوم. *تناول نظامًا غذائيًا صحيًا. *مارس الرياضة بانتظام. *اقضِ وقتًا مع الأصدقاء و…
أنا أتعرض لاعتداء جنسي منذ فترة طويلة ولكني ما زلت أشعر بالألم والضيق ، كيف يمكنني التعامل مع هذا الأذى في الماضي؟	الاعتداء الجنسي هو تجربة مؤلمة للغاية ويمكن أن يكون لها تأثير عميق على حياتك. من الطبيعي أن تشعر بالألم والضيق بعد الاعتداء الجنسي ، وقد يستغرق الأمر وقتًا طويلاً للشفاء. ومع ذلك ، هناك أشياء يمكنك القيام بها للمساعدة في التعامل مع الأذى في الماضي والمضي قدمًا في حياتك. أولاً ، من المهم أن تتذكر أنك لست وحدك. يتعرض الملايين من الأشخاص للاعتداء الجنسي كل عام ، وهناك العديد من الموارد المتاحة لمساع…
شعرت أن حياتي تفتقر إلى المعنى والهدف ، وأنني لم أجد ما أريد فعله حقًا ، وكان هذا الشعور بالضياع مؤلمًا للغاية.	أشعر أنك تمر بوقت عصيب. يمكن أن يكون الشعور بالضياع مؤلمًا للغاية. قد يكون من المفيد التحدث إلى معالج أو مستشار لمساعدتك في العثور على هدف في حياتك. يمكنهم مساعدتك في تحديد نقاط قوتك واهتماماتك وقيمك. بمجرد أن يكون لديك فهم أفضل لنفسك ، يمكنك البدء في تحديد أهداف واقعية لنفسك. قد يكون من المفيد أيضًا التطوع أو الانخراط في مجتمعك. يمكن أن يساعدك هذا في الشعور بالاتصال بشيء أكبر من نفسك وإحداث فرق …
ذات يوم، وجدت طريقة للهروب من عالمي الواقعي، وهو وضع رأسي على الأريكة، وسد أذني، وعدم الاستماع إلى الصوت الخارجي، حتى أتمكن من الانغماس تمامًا في عالم مع نفسي فقط، عندما سقطت في هذا العالم، اختفت كل المشاكل.	يبدو أنك وجدت طريقة للهروب من الواقع والانغماس في عالمك الخاص. هذا يمكن أن يكون مفيدًا في بعض الأحيان ، ولكن من المهم أيضًا البقاء على اتصال مع العالم الحقيقي. حاول إيجاد توازن بين الاثنين حتى تتمكن من الاستمتاع بالحياة على أكمل وجه.
غالبًا ما أشعر بالوحدة والعجز ، وأشعر بأنني غير مفهومة أو مدعومة من قبل أي شخص ، حتى عندما يكون هناك أشخاص من حولي ، أشعر بالعزلة والغربة ، هذه المشاعر تجعلني مكتئبًا وسلبيًا للغاية ، وأحيانًا تثير القلق وأعراض الاكتئاب	أشعر أنك وحيد وغير مفهوم وغير مدعوم. هذا شعور صعب للغاية ويمكن أن يكون له تأثير سلبي على صحتك العقلية والعاطفية. من المهم أن تتذكر أنك لست وحدك في هذا الشعور. هناك الكثير من الناس الذين يشعرون بنفس الطريقة. هناك أيضًا أشخاص يريدون مساعدتك. إذا كنت تشعر بالاكتئاب أو القلق ، فيرجى التحدث إلى طبيبك أو معالج نفسي. يمكنهم مساعدتك في فهم مشاعرك وتطوير استراتيجيات للتغلب عليها.
كلمة واحدة منك يمكن أن تحطم قلبي	لا
أنا غير راضٍ تمامًا عن شكلي ومظهري، وغالبًا ما أعاني من تدني احترام الذات والقلق	أفهم أنك غير راضٍ عن مظهرك، وأنك تعاني من تدني احترام الذات والقلق. هذا أمر شائع جدًا، وأنا هنا لمساعدتك. أولاً، دعني أخبرك أنك لست وحدك. يعاني الكثير من الناس من نفس المشاعر. من المهم أن تتذكر أنك لست وحدك، وأن هناك أشخاصًا يهتمون بك ويريدون مساعدتك. ثانيًا، دعني أخبرك أنك لست قبيحًا. أنت شخص جميل، بغض النظر عن مظهرك. جمالك يأتي من الداخل، من شخصيتك وقلبك. لا تدع أي شخص يخبرك أنك قبيح، لأنك لست …
لا أعرف حقًا ما أفعله، ليس لدي أدنى فكرة عندما أفعل أي شي، هذا يجعلني محبط	يبدو أنك تشعر بالإحباط بسبب شعورك بعدم اليقين بشأن أفعالك. قد يكون من المفيد أن تأخذ بعض الوقت للتفكير فيما تريده حقًا من الحياة وما هي أهدافك. بمجرد أن يكون لديك فهم أفضل لما تريد تحقيقه، يمكنك البدء في وضع خطة لتحقيق أهدافك. قد يكون من المفيد أيضًا التحدث إلى شخص تثق به، مثل صديق أو أحد أفراد العائلة أو معالج، حول ما تمر به. يمكنهم تقديم الدعم والمساعدة لك في وضع خطة للمضي قدمًا.
لدي الكثير من الخوف الاجتماعي ، لا أجرؤ على التواصل مع الغرباء ، ولا أحب الظهور في الأماكن المزدحمة ، أتمنى أن أتغلب على هذه المخاوف	الخوف الاجتماعي هو شعور شائع بالقلق أو الخوف من المواقف الاجتماعية. يمكن أن يتراوح من الشعور بالتوتر أو القلق قليلاً في المواقف الاجتماعية إلى الخوف الشديد الذي يتداخل مع الحياة اليومية. هناك عدد من الأشياء التي يمكنك القيام بها للتغلب على الخوف الاجتماعي، بما في ذلك: * العلاج: يمكن أن يساعدك العلاج في تعلم كيفية إدارة قلقك الاجتماعي وتطوير مهارات التأقلم. * الأدوية: يمكن أن تساعد بعض الأدوية في …
يعتقد علماء النفس أن الاكتئاب الشديد قد يؤثر على صحة الشخص الجسدية والعقلية	يعتقد علماء النفس أن الاكتئاب الشديد قد يؤثر على صحة الشخص الجسدية والعقلية. يمكن أن يؤدي الاكتئاب إلى مجموعة متنوعة من الأعراض الجسدية، بما في ذلك التعب والألم والصداع ومشاكل الجهاز الهضمي. كما يمكن أن يؤثر الاكتئاب على الصحة العقلية للشخص، مما يسبب مشاعر الحزن واليأس والقلق. في بعض الحالات، يمكن أن يؤدي الاكتئاب إلى أفكار أو سلوكيات انتحارية.
عندما أبدأ في السعي وراء هدف ، أشعر بالعجز ، وكلما حاولت تغيير شيء ما ، أشعر أنني لا أملك الشجاعة	أشعر أنك قد تشعر بالعجز عندما تبدأ في السعي وراء هدف لأنك لا تعرف ما إذا كنت ستنجح أم لا. قد تشعر أيضًا أنك لا تملك الشجاعة لتغيير شيء ما لأنك تخشى الفشل. ومع ذلك ، من المهم أن تتذكر أنك لست وحدك في هذا الشعور. كثير من الناس يشعرون بنفس الطريقة عندما يبدأون في السعي وراء هدف جديد. المفتاح هو الاستمرار في المضي قدمًا وعدم الاستسلام. إذا كنت تستمر في المحاولة ، فستحقق هدفك في النهاية.
أعاني غالبًا من الأرق وصعوبة التركيز في العمل لأنني أخشى ألا أكون قادرًا على أداء الوظيفة التي أقوم بها	هل يمكنك أن تخبرني المزيد عن مخاوفك بشأن عدم القدرة على أداء وظيفتك؟
أشعر بألم أكثر من أي وقت مضى عندما ترفض عائلتي مساعدتي	أشعر بالأسف لسماع أنك تشعر بالألم. يمكن أن يكون من الصعب التعامل مع رفض الأسرة. قد يكون من المفيد التحدث إلى معالج أو مستشار حول ما تمر به. يمكنهم مساعدتك في فهم مشاعرك وتطوير استراتيجيات للتعامل مع الموقف.
أشعر بالاكتئاب في كل مرة أواجه فيها صعوبات	أشعر بالاكتئاب في كل مرة أواجه فيها صعوبات. هذا شعور شائع، وأنت لست وحدك. من المهم أن تتذكر أنك لست وحدك، وأن هناك أشخاصًا يهتمون بك ويريدون مساعدتك. إذا كنت تشعر بالاكتئاب، فتحدث إلى شخص تثق به، مثل صديق أو أحد أفراد العائلة أو معالج. يمكنهم تقديم الدعم والاستماع إليك ومحاولة مساعدتك في التغلب على اكتئابك. تذكر أنك لست وحدك، وأن هناك أشخاصًا يهتمون بك ويريدون مساعدتك.
غالبًا ما أشعر بالاكتئاب والعجز ، وأشعر أن حياتي تفتقر إلى المعنى والقيمة ، وأحيانًا أفكر في الانتحار ، لكنني أخشى إخبار أي شخص ، خوفًا من أن يعتقد أنني شخص ضعيف وفاشل.	أفهم أنك تمر بوقت عصيب وأنك تشعر بالاكتئاب والعجز. من المهم أن تتذكر أنك لست وحدك وأن هناك أشخاصًا يهتمون بك ويريدون مساعدتك. إذا كنت تفكر في الانتحار ، فالرجاء الاتصال بخط منع الانتحار على الرقم 1-800-273-8255. يمكنك أيضًا التحدث إلى طبيبك أو معالج نفسي حول ما تمر به. هناك مساعدة متاحة ، ولا داعي للمعاناة وحدك.
لدي صديق يشعر دائمًا أنه ليس جيدًا بما يكفي ، أو ذكيًا بما يكفي ، أو موهوبًا بما فيه الكفاية ، أو حتى يستحق الاهتمام به ، مما يجعلني أقلق بشأن صحته النفسية.	من المهم أن تكون داعمًا لصديقك وتشجعه على التحدث إلى أخصائي الصحة العقلية. يمكن للمعالج مساعدة صديقك على فهم أسباب شعوره بعدم الكفاءة وتطوير استراتيجيات للتغلب على هذه المشاعر. في غضون ذلك ، يمكنك أن تكون صديقًا داعمًا من خلال الاستماع إليه ، وتقديم التشجيع ، ومساعدته على التركيز على نقاط قوته وإنجازاته.
كثيرا ما أشعر بالاكتئاب واليأس بسبب ضغوط العمل والخلافات الأسرية، كيف يمكنني تخفيف هذه المشاعر والحفاظ على صحتي النفسية؟	أشعر بالأسف لسماع أنك تشعر بالاكتئاب واليأس. يمكن أن يكون ضغوط العمل والخلافات الأسرية مرهقة للغاية، ومن المهم اتخاذ خطوات لرعاية صحتك العقلية. فيما يلي بعض النصائح التي قد تساعدك: * **احصل على قسط كافٍ من النوم.** عندما لا تحصل على قسط كافٍ من النوم، فقد يكون من الصعب التفكير بوضوح واتخاذ قرارات جيدة. حاول أن تهدف إلى الحصول على 7-8 ساعات من النوم كل ليلة. * **تناول نظامًا غذائيًا صحيًا.** يمكن …
في الآونة الأخيرة ، بدأ ذهني يصبح غائمًا وبدأت أشعر بالقلق بشأن صحتي النفسية وهذا يخيفني	أفهم أنك تشعر بالقلق بشأن صحتك العقلية. هذا أمر طبيعي تمامًا ، خاصة في هذه الأوقات العصيبة. من المهم أن تتذكر أنك لست وحدك وأن هناك أشخاصًا مستعدين لمساعدتك. إذا كنت تشعر بالقلق بشأن صحتك العقلية ، فهناك عدد من الأشياء التي يمكنك القيام بها. أولاً ، تحدث إلى شخص تثق به ، مثل صديق أو أحد أفراد العائلة أو معالج. يمكن أن يساعدك التحدث عن مخاوفك في معالجتها والشعور بتحسن. ثانيًا ، اعتني بنفسك جسديًا.…
لا أجرؤ على مواجهة الآخرين ، أشعر دائمًا أنني لست جيدًا بما يكفي ، أشعر بالتوتر ، حتى لو تحدث أصدقائي معي ، سأظل أقلق بشأن ما يفكرون فيه	أشعر أنك تشعر بالقلق حيال ما يفكر فيه الآخرون عنك. هذا أمر طبيعي تمامًا، ويشعر به الكثير من الناس. من المهم أن تتذكر أنك لست وحدك، وأن هناك أشخاصًا آخرين يشعرون بنفس الطريقة. هناك بعض الأشياء التي يمكنك القيام بها للمساعدة في التغلب على هذا القلق. أولاً، حاول أن تركز على نفسك وعلى ما تريده، بدلاً من التركيز على ما يريده الآخرون. ثانيًا، حاول أن تتقبل نفسك كما أنت، مع نقاط قوتك وضعفك. ثالثًا، حاول…
أشعر بالقلق من عدم قدرتي على الحفاظ على صحتي النفسية وخيبة أمل عائلتي	أشعر بالقلق من أنك تشعر بالقلق من عدم قدرتك على الحفاظ على صحتك النفسية وخيبة أمل عائلتك. هذا أمر مفهوم ، حيث أن الصحة النفسية مهمة جدًا لرفاهيتنا العامة. ومع ذلك ، هناك العديد من الأشياء التي يمكنك القيام بها لتحسين صحتك النفسية ، مثل التحدث إلى معالج ، وممارسة الرياضة ، وتناول نظام غذائي صحي ، والحصول على قسط كافٍ من النوم. يمكنك أيضًا التحدث إلى عائلتك وأصدقائك حول مخاوفك ، حيث قد يكونون قادري…
غالبًا ما أشعر بالوحدة والعجز ، حتى عندما أكون محاطًا بالناس ، أشعر أن لا أحد يفهم عالمي الداخلي	أشعر بالأسف لسماع أنك تشعر بالوحدة والعجز. يمكن أن يكون الشعور بالوحدة أمرًا صعبًا للغاية ، خاصةً عندما تكون محاطًا بأشخاص آخرين. من المهم أن تتذكر أنك لست وحدك في هذا الشعور. هناك الكثير من الناس الذين يشعرون بنفس الطريقة. هناك بعض الأشياء التي يمكنك القيام بها لمساعدة نفسك على الشعور بالوحدة والعجز. أولاً ، حاول التحدث إلى شخص تثق به عن مشاعرك. يمكن أن يكون هذا صديقًا أو أحد أفراد العائلة أو مع…
أشعر بالحيرة الشديدة حيال المستقبل ، لا أعرف ماذا أفعل ، هذا الارتباك يجعلني أشعر بالقلق الشديد وعدم الارتياح	أشعر بالأسف لسماع أنك تشعر بالارتباك بشأن مستقبلك. يمكن أن يكون عدم اليقين بشأن ما يجب فعله أمرًا مرهقًا للغاية. ومع ذلك ، هناك بعض الأشياء التي يمكنك القيام بها للمساعدة في تقليل قلقك وعدم راحتك. أولاً ، حاول أن تتذكر أنك لست وحدك. يشعر الكثير من الناس بالارتباك بشأن مستقبلهم في مرحلة ما من حياتهم. ثانيًا ، حاول التركيز على الأشياء التي يمكنك التحكم فيها ، مثل عملك الجاد في المدرسة أو وظيفتك أو …
ذهبت إلى حفلة اليوم ، لكن الجميع سخر مني ورفضني الآخرون ، وكنت حقاً على وشك الانهيار	أنا آسف لسماع ذلك. يبدو أنك مررت بيوم صعب. من المهم أن تتذكر أنك لست وحدك وأن هناك أشخاصًا يهتمون بك. إذا كنت بحاجة إلى شخص للتحدث إليه ، فلا تتردد في الاتصال بي. أنا هنا من أجلك.
أجد علاقاتي صعبة ومن الصعب دائمًا تكوين روابط عميقة مع الناس. شعرت أنني لا أعرف كيف أتعايش مع الناس أو كيف أتواصل، لذلك كنت أنعزل بسهولة. أتوق إلى الحصول على أصدقاء حقيقيين، لكن لا أعرف كيفية تكوينهم.	أفهم أنك تواجه صعوبة في تكوين علاقات عميقة مع الناس. هذا أمر شائع، ويمكن أن يكون محبطًا للغاية. ومع ذلك، هناك بعض الأشياء التي يمكنك القيام بها لتحسين مهاراتك الاجتماعية وتكوين صداقات جديدة. أولاً، من المهم أن تكون منفتحًا على مقابلة أشخاص جدد. هذا يعني الخروج من منطقة الراحة الخاصة بك والتحدث إلى أشخاص لا تعرفهم. يمكنك القيام بذلك عن طريق الانضمام إلى نادٍ أو فصل دراسي أو التطوع في قضية تهتم بها…
يوجد الكثير من الضغط في عملي، ولا بد لي من العمل الإضافي كل يوم، وغالبًا ما أعمل حتى وقت متأخر. أشعر أن جسدي وعقلي قد بلغا حدودهما، لكني ما زلت لا أستطيع التوقف. ما الذي يجب علي فعله لتجنب الانهيار.	إليك بعض النصائح لتجنب الانهيار في العمل: 1. خذ فترات راحة منتظمة. قُم من مكتبك كل 20-30 دقيقة وتحرك. خذ استراحة لمدة 10-15 دقيقة كل ساعتين أو ثلاث ساعات. 2. حدد أولويات مهامك. ركز على المهام الأكثر أهمية أولاً، وقم بتفويض المهام الأقل أهمية إلى الآخرين. 3. تعلم كيفية قول "لا". لا تخف من قول "لا" للمهام الجديدة إذا كنت تشعر بالإرهاق بالفعل. 4. خذ إجازة. إذا كنت تشعر بالإرهاق، فخذ إجازة من العمل. …
أشعر أنني لا أستطيع التحكم في مشاعري ، وغالبًا ما أفقد أعصابي بسبب أشياء صغيرة ، مما يجعل الناس من حولي غير مرتاحين	أشعر أنني لا أستطيع التحكم في مشاعري ، وغالبًا ما أفقد أعصابي بسبب أشياء صغيرة ، مما يجعل الناس من حولي غير مرتاحين. هذا أمر مفهوم ، ويمكن أن يكون محبطًا للغاية عندما تشعر أنك لا تستطيع التحكم في عواطفك. ومع ذلك ، هناك بعض الأشياء التي يمكنك القيام بها للمساعدة في إدارة مشاعرك بشكل أفضل. أولاً ، حاول تحديد ما الذي يثير مشاعرك. هل هناك مواقف أو أشخاص معينون يميلون إلى إثارة غضبك أو حزنك أو إحباطك؟…
لم يكن هناك حب في عائلتي ، ولا كلمات دافئة ، ولا إحساس حقيقي بالأمان ، فقط اللوم والضغط علي ، لذلك أصبحت أكثر انطوائية ولم أرغب في التعامل مع أي شخص.	يبدو أنك مررت بطفولة صعبة للغاية. من المؤسف أنك لم تشعر بالحب أو الدعم من عائلتك. من الطبيعي أن تشعر بالانطواء وعدم الرغبة في التعامل مع أي شخص بعد تجربة مثل هذه. قد يكون من المفيد لك التحدث إلى معالج أو مستشار حول تجاربك حتى تتمكن من البدء في الشفاء منها والمضي قدمًا في حياتك.
أنا قلق على مستقبلي ، ولا أعرف ما إذا كنت سأكون ناجحًا ، وما إذا كنت سأتمكن من تحقيق أحلامي	أنا أفهم قلقك بشأن مستقبلك. من الطبيعي أن تشعر بالقلق بشأن ما إذا كنت ستكون ناجحًا أم لا ، وما إذا كنت ستتمكن من تحقيق أحلامك. ومع ذلك ، من المهم أن تتذكر أنك لست وحدك في هذا. يشعر الكثير من الناس بنفس الطريقة. أفضل شيء يمكنك القيام به هو التركيز على الأشياء التي يمكنك التحكم فيها ، مثل عملك الجاد وتصميمك. إذا بذلت قصارى جهدك ، فمن المرجح أن تحقق أهدافك. تذكر أيضًا أن النجاح لا يحدث بين عشية وضحا…
شعرت أنني لا أستطيع التعامل مع الضغوط والتحديات في حياتي، وغالبًا ما كنت أعاني من مزاج منخفض وقلق وأرق وغيرها من المشاكل.	يبدو أنك تمر بوقت عصيب. من المهم أن تتذكر أنك لست وحدك وأن هناك أشخاصًا يمكنهم مساعدتك. إذا كنت تشعر بالإرهاق، فلا تتردد في طلب المساعدة من الأصدقاء أو العائلة أو المهنيين. هناك أيضًا العديد من الموارد المتاحة عبر الإنترنت لمساعدتك على التعامل مع التوتر والتحديات في حياتك.
أشعر بالوحدة ولدي الكثير من الناس حولي لكنني لا أشعر دائمًا أنني أستطيع التواصل معهم حقًا. هل هذا اضطراب في العلاقة؟	لا، الشعور بالوحدة مع وجود أشخاص من حولك ليس بالضرورة اضطرابًا في العلاقة. يمكن أن يكون الشعور بالوحدة تجربة شائعة، ويمكن أن يحدث لأي شخص بغض النظر عن وضعه الاجتماعي أو علاقاته. ومع ذلك، إذا كنت تشعر بالوحدة باستمرار أو إذا كان شعورك بالوحدة يؤثر على حياتك اليومية، فقد يكون من المفيد التحدث إلى معالج أو مستشار لمساعدتك في فهم أسباب شعورك بالوحدة وكيفية التعامل معها.
أشعر بعدم الارتياح تجاه المستقبل ، ولا أعرف ماذا أفعل معي ، ولا أعرف ما يخبئه المستقبل	أشعر بالقلق أيضًا بشأن المستقبل. إنه أمر غير مؤكد ، ويمكن أن يكون مخيفًا ألا تعرف ما يخبئه لك. لكن تذكر أنك لست وحدك. يشعر الجميع بالقلق بشأن المستقبل في مرحلة ما. هناك بعض الأشياء التي يمكنك القيام بها للمساعدة في تخفيف قلقك بشأن المستقبل. أولاً ، حاول التركيز على الأشياء التي يمكنك التحكم فيها. لا يمكنك التحكم في كل ما يحدث في حياتك ، ولكن يمكنك التحكم في كيفية رد فعلك تجاهه. ثانيًا ، حاول أن ت…
لدي الكثير من المشاكل في علاقة زواجي وأشعر بالاكتئاب والعجز ولا أعرف ماذا أفعل	أفهم أنك تمر بوقت عصيب في علاقة زواجك. يمكن أن يكون الاكتئاب والشعور بالعجز أمرًا صعبًا للغاية للتعامل معه. من المهم أن تتذكر أنك لست وحدك وأن هناك أشخاصًا يمكنهم مساعدتك. إليك بعض الأشياء التي يمكنك القيام بها للمساعدة في تحسين وضعك: * تحدث إلى زوجتك عن مشاعرك. من المهم أن تكون منفتحًا وصادقًا بشأن ما تمر به. قد لا يدرك زوجتك مدى شعورك بالسوء وقد يكون قادرًا على تقديم الدعم لك. * اطلب المساعدة ا…
غالبًا ما أشعر بالتعب الشديد، والإرهاق الجسدي والنفسي، وأحيانًا تكون لدي أفكار انتحارية، والشعور بأن حياتي بلا معنى	أشعر بالأسف لسماع أنك تشعر بهذه الطريقة. يبدو أنك تمر بوقت عصيب حقًا. من المهم أن تتذكر أنك لست وحدك وأن هناك أشخاصًا يهتمون بك ويريدون مساعدتك. إذا كنت تفكر في إيذاء نفسك، فيرجى الاتصال بخط منع الانتحار على الرقم 1-800-273-8255. يمكنك أيضًا التحدث إلى صديق أو أحد أفراد العائلة أو معالج نفسي. هناك أشخاص يريدون مساعدتك، ويريدون أن يشعروا بتحسن.
أحيانًا أشعر فجأة بالخوف الشديد والذعر ، ويصعب السيطرة على مشاعري وسلوكي ، وتستمر هذه الحالة لفترة طويلة.	قد يكون هذا علامة على اضطراب الهلع. اضطراب الهلع هو اضطراب القلق الذي يسبب نوبات مفاجئة من الخوف الشديد. يمكن أن تكون هذه النوبات مخيفة للغاية ويمكن أن تسبب مجموعة متنوعة من الأعراض الجسدية ، مثل ضيق التنفس ، وخفقان القلب ، والدوخة ، والغثيان. إذا كنت تعتقد أنك قد تعاني من اضطراب الهلع ، فمن المهم التحدث إلى طبيبك أو أخصائي الصحة العقلية. يمكنهم مساعدتك في تشخيص حالتك وتقديم العلاج.
كلما واجهت تحديًا جديدًا ، أشعر بالتوتر الشديد وعدم الأمان لدرجة أنني أشعر أنني لا أستطيع التعامل معه	* خذ نفسا عميقا. خذ بضع دقائق لتهدئة نفسك وجمع أفكارك. * قسم التحدي إلى خطوات أصغر. سيؤدي هذا إلى جعله يبدو أقل شاقة ويمكن التحكم فيها. * ركز على ما يمكنك التحكم فيه. لا يمكنك التحكم في كل شيء ، لذا ركز على الأشياء التي يمكنك التحكم فيها ، مثل موقفك وجهودك. * تذكر نجاحاتك السابقة. لقد تغلبت على التحديات من قبل ، ويمكنك فعل ذلك مرة أخرى. * اطلب المساعدة من الآخرين. لا تخف من طلب المساعدة من الأصدق…
أشعر أحيانًا فجأة أنه لم يعد لدي أي هوايات، ولم يعد لدي أي اهتمام بأي شيء، وأشعر أنني فقدت الاتجاه والقوة الدافعة	أشعر أحيانًا فجأة أنه لم يعد لدي أي هوايات، ولم يعد لدي أي اهتمام بأي شيء، وأشعر أنني فقدت الاتجاه والقوة الدافعة. هذا شعور شائع، ويمكن أن يكون محبطًا للغاية. ولكن هناك أشياء يمكنك القيام بها للتغلب على هذا الشعور. أولاً، حاول أن تتذكر ما كنت تستمتع به في الماضي. ما هي الهوايات التي كنت تمارسها؟ ما هي الأشياء التي كنت تحب القيام بها؟ بمجرد أن يكون لديك فكرة أفضل عما كنت تستمتع به، يمكنك البدء في …
في بعض الأحيان يكون هناك نوع من المشاعر التي لا يمكن السيطرة عليها في قلبي، أعتقد أنني أعاني من الاكتئاب، ماذا أفعل	إذا كنت تعتقد أنك تعاني من الاكتئاب، فمن المهم التحدث إلى أخصائي الصحة العقلية. يمكن للأخصائي تشخيص حالتك وتقديم العلاج المناسب لك. هناك عدد من الأشياء التي يمكنك القيام بها للمساعدة في إدارة الاكتئاب، بما في ذلك: * الحصول على قسط كافٍ من النوم. * تناول نظام غذائي صحي. * ممارسة الرياضة بانتظام. * تجنب الكحول والمخدرات. * قضاء الوقت مع أحبائك. * تعلم تقنيات الاسترخاء. * التحدث إلى معالج. إذا كنت ت…
لطالما شعرت أن صحتي الجسدية غير جيدة، ولدي كل أنواع الأعراض الغريبة، لكن الأطباء يقولون إنني بصحة جيدة، مما يجعلني أشعر بقلق شديد وعجز.	أفهم أنك تشعر بالإحباط والقلق بشأن صحتك. من الصعب أن تشعر بأنك لست على ما يرام، خاصةً عندما يقول لك الأطباء أنك بصحة جيدة. ومع ذلك، من المهم أن تتذكر أن الأطباء ليسوا معصومين من الخطأ. في بعض الأحيان، قد لا يتمكنون من تشخيص حالتك بشكل صحيح. إذا كنت لا تزال تشعر بأنك لست على ما يرام، فعليك أن تثق في غرائزك وتستمر في البحث عن إجابات. إليك بعض الأشياء التي يمكنك القيام بها: * احصل على رأي ثانٍ من طب…
نظرًا لوجوده في بيئة متوترة لفترة طويلة ، غالبًا ما يعاني هوانغ شياو مينغ من الأرق ، ولا يمكنه التمييز بين الصباح والمساء ، ويفقد إيقاعه تمامًا	نظرًا لوجوده في بيئة متوترة لفترة طويلة ، غالبًا ما يعاني هوانغ شياو مينغ من الأرق ، ولا يمكنه التمييز بين الصباح والمساء ، ويفقد إيقاعه تمامًا. أعتقد أن هذا يرجع إلى حقيقة أن هوانغ شياو مينغ كان تحت ضغط كبير لفترة طويلة. الضغط يمكن أن يؤدي إلى الأرق، والأرق يمكن أن يؤدي إلى فقدان الإيقاع.
لم تكن علاقتي بأصدقائي رائعة أبدًا ، أشعر وكأنني أجد صعوبة في تكوين صداقات حقيقية وهذا يجعلني أشعر بالوحدة الشديدة	أشعر أنك تشعر بالوحدة لأنك تواجه صعوبة في تكوين صداقات حقيقية. هذا شعور شائع جدًا، وأنا هنا لأخبرك أنك لست وحدك. هناك الكثير من الناس الذين يشعرون بنفس الطريقة. هناك بعض الأشياء التي يمكنك القيام بها لتكوين صداقات حقيقية. أولاً، حاول أن تكون منفتحًا وودودًا مع الآخرين. ثانيًا، حاول أن تجد أشخاصًا لديهم اهتمامات مشتركة معك. ثالثًا، حاول أن تكون مستمعًا جيدًا وأن تهتم بما يقوله الآخرون. رابعًا، حاو…
يعتقد الناس من حولي دائمًا أنني متوتر جدًا وقلق بشأن الأشياء الصغيرة ، كيف يمكنني الاسترخاء؟	* **خذ نفسًا عميقًا.** عندما تشعر بالتوتر ، خذ نفسًا عميقًا وبطيئًا. سيساعد ذلك على إبطاء معدل ضربات قلبك وإرخاء جسمك. * **مارس تمارين الاسترخاء.** هناك العديد من تمارين الاسترخاء المختلفة التي يمكنك تجربتها ، مثل اليوجا والتأمل والتدليك. يمكن أن تساعدك هذه التمارين على تعلم كيفية التحكم في استجابتك للتوتر. * **احصل على قسط كافٍ من النوم.** عندما تكون متعبًا ، تكون أكثر عرضة للشعور بالتوتر والقلق…
أجبرني الأرق على رؤية طبيب نفسي كل ليلة	الأرق هو اضطراب شائع في النوم يمكن أن يجعل من الصعب عليك النوم أو البقاء نائماً. يمكن أن يكون الأرق مزعجًا للغاية ويمكن أن يؤثر على حياتك اليومية. إذا كنت تعاني من الأرق، فمن المهم التحدث إلى طبيبك حول خيارات العلاج. هناك مجموعة متنوعة من العلاجات المتاحة للأرق، بما في ذلك العلاج السلوكي المعرفي والأدوية. يمكن لطبيبك مساعدتك في تحديد العلاج المناسب لك.
أشعر أنني غير قادر على مواجهة ضغط الأسرة والمجتمع ، ولا يمكنني إنجاز أشياء كثيرة	أشعر أنك تشعر بالضغط من عائلتك ومجتمعك ، وأنك لا تستطيع مواكبة ذلك. هذا شعور شائع ، ويمكن أن يكون ساحقًا. من المهم أن تتذكر أنك لست وحدك ، وأن هناك أشخاصًا يمكنهم مساعدتك. هناك بعض الأشياء التي يمكنك القيام بها لتقليل التوتر الذي تشعر به. أولاً ، حاول تحديد مصادر التوتر في حياتك. هل هي توقعات عائلتك؟ ضغوط العمل؟ أم شيء آخر؟ بمجرد أن تعرف مصادر التوتر ، يمكنك البدء في معالجتها. ثانيًا ، خصص وقتًا …
أشعر أن علاقاتي الشخصية تزداد سوءًا، ولم يعد يثق بي الأصدقاء ولا العائلة ولا يدعمونني بعد الآن، فهذا يجعلني أشعر بالضياع واليأس.	أشعر أن علاقاتك الشخصية تزداد سوءًا، ولم يعد يثق بك الأصدقاء ولا العائلة ولا يدعمونك بعد الآن، فهذا يجعلك تشعر بالضياع واليأس. هذا أمر مفهوم، ويبدو أنك تمر بوقت عصيب. من المهم أن تتذكر أنك لست وحدك، وأن هناك أشخاصًا يهتمون بك ويريدون مساعدتك. إذا كنت ترغب في التحدث إلى شخص ما، فهناك العديد من الموارد المتاحة لك. يمكنك الاتصال بخط المساعدة الوطني لمنع الانتحار على الرقم 1-800-273-8255، أو يمكنك ال…
غالبًا ما أشعر بعدم القدرة على التحكم في مشاعري وسلوكي ، وغالبًا ما أتصرف باندفاع أو بعنف.	يبدو أنك تمر بوقت عصيب. من المهم أن تتذكر أنك لست وحدك وأن هناك أشخاصًا مستعدين لمساعدتك. إذا كنت تشعر بأنك خارج عن السيطرة ، فهناك بعض الأشياء التي يمكنك القيام بها للمساعدة في تهدئة نفسك. أولاً ، حاول أن تأخذ نفسًا عميقًا وبطيئًا. يمكن أن يساعدك هذا على الشعور بالهدوء والاسترخاء. ثانيًا ، حاول أن تشتت انتباهك عن الموقف. يمكنك القيام بذلك عن طريق الاستماع إلى الموسيقى أو مشاهدة فيلم أو قراءة كتا…
غالبًا ما أخاف من الرفض ، لذلك نادرًا ما أتحدث عن رأيي	أفهم أنك قد تخشى الرفض ، لكن من المهم أن تتحدث عن رأيك. عندما لا تتحدث عن رأيك ، فإنك تسمح للآخرين باتخاذ القرارات نيابة عنك. هذا يمكن أن يؤدي إلى الشعور بالإحباط والاستياء. هناك بعض الأشياء التي يمكنك القيام بها للتغلب على خوفك من الرفض. أولاً ، حاول أن تتذكر أن الجميع يتعرض للرفض في مرحلة ما. إنه جزء طبيعي من الحياة. ثانيًا ، ركز على الرسالة التي تحاول توصيلها ، وليس على كيفية استقبالها. وأخيرً…
يبدأ الاكتئاب في التطور ببطء خلال سنوات المراهقة	يبدأ الاكتئاب في التطور ببطء خلال سنوات المراهقة، وغالبًا ما يكون مصحوبًا بتغيرات في المزاج والسلوك. قد يشعر المراهقون المصابون بالاكتئاب بالحزن أو الانسحاب أو فقدان الاهتمام بأنشطتهم المعتادة. قد يعاني أيضًا من مشاكل في النوم أو الشهية أو التركيز. في بعض الحالات، قد يفكر المراهقون المصابون بالاكتئاب في إيذاء أنفسهم أو الانتحار.
أشعر بعدم الرضا عن مظهري وجسدي ، وأشعر بأنني أقل من الكمال ، وغالبًا ما أشعر بالقلق والمضطرب	أشعر بالأسف لسماع أنك تشعر بهذه الطريقة. من المهم أن تتذكر أنك لست وحدك في هذا الشعور. كثير من الناس يشعرون بعدم الرضا عن مظهرهم أو أجسادهم في مرحلة ما من حياتهم. من المهم أن تكون لطيفًا مع نفسك وتتذكر أنك شخص فريد وجميل بغض النظر عن مظهرك. إذا كنت تشعر بالقلق أو الاكتئاب بشأن مظهرك ، فيرجى التحدث إلى طبيبك أو معالج نفسي. يمكنهم مساعدتك في تطوير استراتيجيات للتغلب على هذه المشاعر.
أشعر دائمًا بالقلق من أن ما أفعله ليس جيدًا بما يكفي ، حتى لو مدحني الآخرون ، فلا يمكنني التخلي عن مخاوفي	أشعر دائمًا بالقلق من أن ما أفعله ليس جيدًا بما يكفي ، حتى لو مدحني الآخرون ، فلا يمكنني التخلي عن مخاوفي. هذا شعور شائع جدًا ، ويُعرف باسم "متلازمة المحتال". إنه شعور بأنك لست جيدًا بما يكفي ، وأنك لا تستحق النجاح الذي حققته. قد تشعر أنك خدعة ، وأنك ستنكشف في النهاية. هناك بعض الأشياء التي يمكنك القيام بها للتغلب على متلازمة المحتال. أولاً ، من المهم أن تتذكر أنك لست وحدك. يعاني الكثير من الناس …
لقد وجدت صعوبة متزايدة في التركيز ، سواء كان ذلك في القراءة أو القيام بأشياء ، فسوف يتشتت انتباهي بسهولة	هناك عدد من الأسباب المحتملة لصعوبة التركيز. قد يكون أحد الأسباب هو أنك لا تحصل على قسط كافٍ من النوم. عندما تكون متعبًا ، يكون من الصعب التركيز والانتباه. سبب محتمل آخر هو أنك تعاني من الكثير من التوتر أو القلق. عندما تكون تحت الضغط ، يكون من الصعب التركيز على المهام. سبب محتمل ثالث هو أنك لا تمارس الرياضة بانتظام. يمكن أن يساعد التمرين في تحسين التركيز والانتباه. سبب محتمل رابع هو أنك لا تأكل ن…
أجد صعوبة متزايدة في التركيز، سواء كان ذلك في القراءة أو القيام بأشياء أخرى، يتشتت انتباهي بسهولة	هناك عدد من الأشياء التي يمكنك القيام بها لتحسين قدرتك على التركيز. فيما يلي بعض النصائح: * احصل على قسط كافٍ من النوم. عندما تكون متعبًا، يكون من الصعب التركيز. تأكد من حصولك على 7-8 ساعات من النوم كل ليلة. * تناول نظامًا غذائيًا صحيًا. تناول الأطعمة التي تحتوي على الكثير من الفواكه والخضروات والحبوب الكاملة. تجنب الأطعمة المصنعة والسكريات والدهون غير الصحية. * ممارسة الرياضة بانتظام. يمكن أن يس…
كنت مرعوبًا من التفاعل مع الناس ، خائفًا من الرفض أو السخرية أو سوء الفهم ، وغالبًا ما شعرت بالوحدة والعجز.	أشعر أنك كنت تشعر بالوحدة والعجز بسبب خوفك من التفاعل مع الناس. يبدو أنك كنت خائفًا من الرفض أو السخرية أو سوء الفهم. هذا يمكن أن يكون شعورًا صعبًا للغاية.
كنت مستاء للغاية من مظهري وشكلي ، وشعرت بأنني قبيح وغير جذاب ، وكثيرًا ما كنت أفكر في إجراء جراحة تجميلية وفقدان الوزن ، ولكني كنت قلقًا أيضًا من مخاطر الجراحة ، وكنت أخشى أن يسخر مني الآخرون ويرفضون.	أفهم أنك كنت تشعر بالضيق من مظهرك وشكلك، وأنك فكرت في إجراء جراحة تجميلية وفقدان الوزن. من المهم أن تتذكر أن الجراحة التجميلية ليست حلاً سحريًا، وأنها تنطوي على مخاطر. من المهم أيضًا أن تتذكر أنك لست وحدك في شعورك، وأن هناك الكثير من الأشخاص الذين يشعرون بنفس الطريقة. إذا كنت تفكر في إجراء جراحة تجميلية، فمن المهم أن تتحدث إلى طبيبك أو إلى معالج نفسي للمساعدة في اتخاذ قرار مستنير.
غالبًا ما أبقى مستيقظًا وأعمل لساعات إضافية من أجل العمل، مما يجعل حالتي الجسدية أسوأ وأسوأ، لكن لا يمكنني التوقف، لأنني أشعر أنه بهذه الطريقة فقط يمكنني إثبات قيمتي وقدرتي	أفهم أنك تشعر بالضغط لإثبات قيمتك وقدراتك في العمل. ومع ذلك، من المهم أن تعتني بصحتك الجسدية والعقلية. العمل لساعات إضافية باستمرار يمكن أن يؤدي إلى الإرهاق والمشاكل الصحية الأخرى. قد يكون من المفيد التحدث إلى مديرك أو زملائك في العمل حول كيفية تقليل عبء العمل لديك. يمكنك أيضًا تجربة بعض تقنيات إدارة الإجهاد، مثل ممارسة اليقظة أو التأمل أو ممارسة الرياضة.
أشعر بأنني أصبحت أكثر إدمانًا للألعاب ووسائل التواصل الاجتماعي، وكأن هذه الأشياء أصبحت جزءًا لا يتجزأ من حياتي، فهذا الاعتماد يجعلني أشعر بعدم القدرة على تخليص نفسي وفقدان نفسي، وآمل أن أجد وسيلة للخروج من هذا الاعتماد.	أشعر بأنك لست وحدك في هذا الشعور، فالكثير من الناس يعانون من إدمان الألعاب ووسائل التواصل الاجتماعي، ولكن الخبر السار هو أن هناك العديد من الأشياء التي يمكنك القيام بها للتغلب على هذا الإدمان. أولاً، حاول أن تحدد الأسباب التي تجعلك تلجأ إلى الألعاب ووسائل التواصل الاجتماعي بشكل مفرط. هل تشعر بالملل؟ هل تحاول الهروب من شيء ما؟ هل تبحث عن وسيلة للتواصل مع الآخرين؟ بمجرد أن تعرف الأسباب، يمكنك البدء…
لقد أزعجني تقلب مزاجي الدائم، فأحيانًا أكون سعيدًا جدًا، وفي أحيان أخرى أكون مكتئبًا جدًا لدرجة أنني أردت قتل نفسي.	أتفهم أن تقلبات المزاج يمكن أن تكون مزعجة للغاية. قد يكون من المفيد التحدث إلى معالج أو مستشار حول تقلبات المزاج لديك. يمكنهم مساعدتك في فهم تقلبات المزاج لديك بشكل أفضل وتطوير استراتيجيات للتعامل معها.
أشعر أحيانًا أنه لا أحد يهتم بي وأنا الوحيد الذي يمكنني الاعتماد عليه حقًا	أنت لست وحدك في هذا الشعور. كثير من الناس يشعرون بنفس الطريقة في مرحلة ما من حياتهم. من المهم أن تتذكر أنك لست وحدك وأن هناك أشخاصًا يهتمون بك ويريدون مساعدتك. إذا كنت تشعر بالإرهاق، فلا تخف من طلب المساعدة. هناك العديد من الموارد المتاحة لك، بما في ذلك الأصدقاء والعائلة والمهنيين في مجال الصحة العقلية.
أعاني من الأرق الدائم الفترة الأخيرة، ودائمًا ما أتقلب على الفراش ليلًا، فهل يمكن أن تكون هذه مشكلة نفسية كامنة؟	الأرق هو اضطراب شائع في النوم يتميز بصعوبة النوم أو البقاء نائماً. يمكن أن يكون الأرق حادًا، مما يعني أنه يستمر لبضعة أيام أو أسابيع، أو مزمنًا، مما يعني أنه يستمر لأكثر من ثلاثة أشهر. هناك العديد من الأسباب المحتملة للأرق، بما في ذلك: * الإجهاد * القلق * الاكتئاب * مشاكل صحية * الأدوية * الكافيين * الكحول * النيكوتين إذا كنت تعاني من الأرق، فمن المهم التحدث إلى طبيبك لاستبعاد أي أسباب طبية محتمل…
لم تكن علاقتي مع عائلتي جيدة أبدًا ، أشعر أنهم لا يفهمونني ، لا يحترمونني ، هذا يجعلني أشعر بالوحدة	أفهم أنك تشعر بالوحدة بسبب علاقتك مع عائلتك. من الصعب أن تشعر أنك غير مفهوم وغير محترم من قبل الأشخاص الذين من المفترض أن يكونوا أقرب إليك. قد يكون من المفيد التحدث إلى معالج أو مستشار حول مشاعرك. يمكنهم مساعدتك في فهم علاقتك مع عائلتك بشكل أفضل وتطوير استراتيجيات للتعامل معها. يمكنك أيضًا محاولة التحدث إلى عائلتك حول كيفية شعورك. دعهم يعرفون أنك تشعر بالوحدة وأنك ترغب في علاقة أقوى معهم. قد لا ي…
غالبًا ما أشعر بالفراغ والوحدة في الداخل ، وأبحث عن شيء لملء الفراغ ، لكن غالبًا لا أجد الطريقة الصحيحة لتخفيف الشعور	أشعر بالأسف لسماع أنك تشعر بالفراغ والوحدة. هذا شعور شائع جدًا ، ويمكن أن يكون من الصعب التعامل معه. ومع ذلك ، هناك بعض الأشياء التي يمكنك القيام بها للمساعدة في تخفيف الشعور. أولاً ، حاول تحديد ما الذي يسبب لك الشعور بالفراغ. هل هو نقص في العلاقات الاجتماعية؟ نقص في النشاط البدني؟ نقص في التحفيز العقلي؟ بمجرد أن تعرف ما الذي يسبب الشعور ، يمكنك البدء في معالجته. إذا كنت تشعر بالوحدة ، فحاول قضاء…
