# Supplementary material
Source: ML conference proceedings conference paper supplement (https://openreview.net/forum?id=JL42j1BL5h)
Supplement: supplementary_material [file Mental_Health_pa.xlsx]

## Sheet: Sheet1
Input	Output
Ich fühle mich oft einsam und hilflos, niemand scheint mich zu verstehen. Ich fühle mich sogar wie ein Versager, ohne jeglichen Wert und Sinn. Dieses Gefühl macht mich sehr traurig und verzweifelt, ich weiß nicht, wie ich es loswerden kann.	Es tut mir leid zu hören, dass Sie sich so fühlen. Einsamkeit und Hilflosigkeit sind häufige Gefühle, und es ist wichtig zu wissen, dass Sie nicht allein sind. Es gibt viele Menschen, die sich genauso fühlen wie Sie, und es gibt Hilfe. Es ist wichtig, dass Sie mit jemandem über Ihre Gefühle sprechen. Das kann ein Freund, ein Familienmitglied, ein Therapeut oder eine andere Person sein, der Sie ve…
Selbst wenn ich nur eine Tüte Chips kaufe, mache ich mir Sorgen, dass die Leute denken, ich esse zu viel – ein selbstzerstörerisches Verhalten	Es ist verständlich, dass Sie sich Sorgen machen, dass die Leute denken, Sie essen zu viel, wenn Sie nur eine Tüte Chips kaufen. Es ist jedoch wichtig, sich daran zu erinnern, dass Sie sich nicht für das Verhalten anderer Menschen verantwortlich machen können. Sie können nur Ihr eigenes Verhalten kontrollieren. Wenn Sie sich Sorgen machen, dass Sie zu viel essen, sollten Sie versuchen, Ihre Essge…
Ich fühlte mich ständig müde und machtlos, unfähig, mich auf meine Aufgaben zu konzentrieren oder überhaupt an den Dingen zu arbeiten, die mich interessierten, was mich sehr frustrierte.	Es tut mir leid zu hören, dass Sie sich so fühlen. Müdigkeit und Antriebslosigkeit können sehr frustrierend sein. Es gibt viele mögliche Ursachen für diese Symptome, daher ist es wichtig, dass Sie einen Arzt aufsuchen, um die Ursache zu ermitteln und eine geeignete Behandlung zu erhalten. In der Zwischenzeit gibt es einige Dinge, die Sie tun können, um sich besser zu fühlen. Achten Sie auf eine g…
In letzter Zeit kann ich nicht gut schlafen oder habe Albträume, wenn ich einschlafe, und ich fühle mich sehr müde und müde, wenn ich aufwache.	Es gibt viele Gründe, warum Sie nachts nicht gut schlafen können. Einige häufige Gründe sind Stress, Angstzustände, Depressionen, Koffein- oder Alkoholkonsum vor dem Schlafengehen, eine schlechte Schlafumgebung oder ein unregelmäßiger Schlafrhythmus. Wenn Sie sich Sorgen über Ihre Schlafprobleme machen, sollten Sie mit Ihrem Arzt sprechen. Er kann Ihnen helfen, die Ursache Ihrer Schlafprobleme zu…
Jedes Mal, wenn ich zum Arzt gehe, stellt sich keine Besserung ein, meine Stimmung verschlechtert sich und ich verfalle oft in Selbstmitleid und Selbstmitleid	Es tut mir leid zu hören, dass Sie sich so fühlen. Es ist wichtig, dass Sie sich Hilfe suchen, wenn Sie sich nicht gut fühlen. Es gibt viele Möglichkeiten, wie Sie sich helfen lassen können. Sie können mit Ihrem Arzt sprechen, einen Therapeuten aufsuchen oder sich einer Selbsthilfegruppe anschließen. Es gibt auch viele Online-Ressourcen, die Ihnen helfen können. Bitte zögern Sie nicht, sich Hilfe…
Ich habe immer das Gefühl, isoliert und ausgeschlossen zu sein, selbst wenn ich unter Menschen bin, fühle ich mich einsam.	Es gibt viele Gründe, warum man sich isoliert und ausgeschlossen fühlen kann, auch wenn man unter Menschen ist. Manchmal liegt es an der eigenen Persönlichkeit, manchmal an der sozialen Situation oder an einer Kombination aus beidem. Wenn Sie sich oft isoliert und ausgeschlossen fühlen, sollten Sie zunächst versuchen, die Gründe dafür zu verstehen. Wenn Sie wissen, warum Sie sich so fühlen, könne…
Lassen Sie sich von Spielen abhängig machen, sonst übt das Internet einen unsichtbaren psychologischen Druck aus	Das Internet ist ein mächtiges Werkzeug, das sowohl für gute als auch für schlechte Zwecke genutzt werden kann. Es ist wichtig, sich der potenziellen Gefahren des Internets bewusst zu sein und Maßnahmen zu ergreifen, um sich vor diesen Gefahren zu schützen. Eine der größten Gefahren des Internets ist die Sucht. Spiele, soziale Medien und andere Online-Aktivitäten können süchtig machen und zu Prob…
In letzter Zeit war der Druck zu hoch. Jeden Tag empfinde ich große Angst, habe Schlafstörungen, Kopfschmerzen und beschleunigten Herzschlag. Es fühlt sich so an, als ob ich jederzeit zusammenbrechen könnte.	Es tut mir leid zu hören, dass Sie unter so hohem Druck stehen. Es ist wichtig, dass Sie sich Zeit für sich selbst nehmen und sich um Ihre Gesundheit kümmern. Wenn Sie sich überfordert fühlen, sollten Sie mit jemandem sprechen, dem Sie vertrauen, oder sich professionelle Hilfe suchen. Es gibt viele Möglichkeiten, mit Stress umzugehen, und es ist wichtig, dass Sie einen Weg finden, der für Sie fun…
Jedes Mal, wenn ich auf Schwierigkeiten und Rückschläge stoße, verliere ich immer das Selbstvertrauen und die Motivation und habe das Gefühl, dass ich damit nicht umgehen kann	Es ist verständlich, dass Sie sich so fühlen, wenn Sie auf Schwierigkeiten und Rückschläge stoßen. Es ist jedoch wichtig, sich daran zu erinnern, dass jeder Fehler macht und dass es in Ordnung ist, nicht immer alles richtig zu machen. Wichtig ist, dass Sie aus Ihren Fehlern lernen und es beim nächsten Mal besser machen. Wenn Sie sich auf Ihre Fehler konzentrieren, werden Sie sich nur selbst runte…
Ich mache mir immer Sorgen, dass das, was ich tue, nicht gut genug ist, und ich habe das Gefühl, ständig von anderen Menschen beurteilt zu werden, und das ist deprimierend.	Es ist verständlich, dass Sie sich Sorgen machen, dass das, was Sie tun, nicht gut genug ist. Viele Menschen fühlen sich so, und es ist wichtig, sich daran zu erinnern, dass Sie nicht allein sind. Es ist auch wichtig, sich daran zu erinnern, dass Sie nicht von anderen Menschen beurteilt werden. Die meisten Menschen sind zu sehr mit sich selbst beschäftigt, um sich um andere zu kümmern. Konzentrie…
Ich machte mir immer Sorgen, ob ich alles richtig mache, hatte Angst davor, was andere über mich denken oder kritisieren würden, und geriet dadurch oft in schmerzhafte Selbstzweifel.	Es ist verständlich, dass Sie sich Sorgen machen, ob Sie alles richtig machen. Es ist auch normal, dass Sie Angst davor haben, was andere über Sie denken oder kritisieren könnten. Diese Gefühle sind ein Zeichen dafür, dass Sie sich um Ihre Mitmenschen kümmern und dass Sie sich bemühen, ein guter Mensch zu sein. Es ist jedoch wichtig, dass Sie sich nicht von diesen Ängsten und Zweifeln kontrollier…
Ich behalte meine Gedanken in meinem Herzen, ich habe immer das Gefühl, dass ich explodiere, und ich kann mich nicht vor den Augen anderer verstecken	Ich verstehe, dass Sie sich überfordert fühlen und dass Sie das Gefühl haben, dass Sie explodieren werden. Es ist wichtig, dass Sie sich erlauben, Ihre Gefühle auszudrücken, und dass Sie sich nicht vor den Augen anderer verstecken. Es gibt viele Möglichkeiten, Ihre Gefühle auszudrücken, z. B. durch Schreiben, Malen, Musik oder Tanz. Sie können auch mit einem Therapeuten oder einer anderen vertrau…
Meine Familie erlebte einen plötzlichen Unfall, beide Eltern wurden schwer verletzt, wodurch ich mich hilflos und deprimiert fühlte und sogar depressive Symptome entwickelte.	Es tut mir leid zu hören, dass Sie und Ihre Familie einen so schweren Unfall erlebt haben. Es ist verständlich, dass Sie sich hilflos und deprimiert fühlen. Depressionen sind eine ernstzunehmende Krankheit, die behandelt werden muss. Wenn Sie sich Sorgen um Ihre psychische Gesundheit machen, sollten Sie mit einem Arzt oder einer Ärztin sprechen. Es gibt viele Möglichkeiten, Depressionen zu behand…
Ich finde heraus, dass ich immer weniger gerne mit Menschen interagiere. Ich ziehe es immer vor, alleine zu sein und habe kein Interesse daran, an sozialen Aktivitäten teilzunehmen oder mein Leben mit anderen zu teilen. Dieses Gefühl der Einsamkeit macht mich sehr deprimiert.	Es ist verständlich, dass Sie sich einsam fühlen, wenn Sie sich von anderen Menschen zurückziehen. Es ist jedoch wichtig zu bedenken, dass es auch in Ordnung ist, Zeit für sich allein zu verbringen. Jeder braucht hin und wieder Zeit, um sich zu entspannen und aufzutanken. Wenn Sie sich jedoch immer mehr von anderen Menschen zurückziehen und sich einsam fühlen, kann dies ein Zeichen für eine Depre…
Ich habe ein starkes Kontrollbedürfnis und möchte immer alles selbst kontrollieren und nicht zulassen, dass andere sich einmischen oder einmischen, was zum Zusammenbruch zwischenmenschlicher Beziehungen führt	Es ist verständlich, dass Sie ein starkes Kontrollbedürfnis haben und alles selbst kontrollieren möchten. Es ist jedoch wichtig zu erkennen, dass es nicht immer möglich ist, alles zu kontrollieren, und dass es manchmal besser ist, andere Menschen sich einmischen zu lassen. Wenn Sie versuchen, alles zu kontrollieren, kann dies zu Stress und Angst führen und Ihre Beziehungen zu anderen Menschen bee…
Ich habe oft das Gefühl, dass mein Geist sehr chaotisch ist, als ob zu viele Gedanken und Stimmen gleichzeitig in meinem Kopf wären, wodurch ich mich sehr verwirrt und verloren fühle	Es gibt ein paar Dinge, die Sie tun können, um Ihren Geist zu beruhigen und sich weniger verwirrt und verloren zu fühlen. * **Nehmen Sie sich Zeit für sich selbst.** Es ist wichtig, dass Sie sich jeden Tag etwas Zeit nehmen, um sich zu entspannen und zu sammeln. Dies kann bedeuten, dass Sie ein Buch lesen, Musik hören oder einfach nur in der Natur spazieren gehen. * **Üben Sie Meditation oder Yog…
Warum ich von meiner Familie für alles, was ich tue, kritisiert werde	Es gibt viele Gründe, warum du von deiner Familie für alles, was du tust, kritisiert werden könntest. Hier sind einige Möglichkeiten: * Deine Familie hat hohe Erwartungen an dich und möchte, dass du erfolgreich bist. * Deine Familie ist besorgt um dich und möchte, dass du keine Fehler machst. * Deine Familie hat andere Werte und Überzeugungen als du und versteht deine Entscheidungen nicht. * Dein…
In letzter Zeit fühle ich mich jeden Tag erschöpft und energielos, auch nach längerem Schlaf wird es nicht besser	Es gibt viele mögliche Gründe, warum Sie sich jeden Tag erschöpft und energielos fühlen, auch nach längerem Schlaf. Einige der häufigsten Gründe sind: * **Stress:** Stress kann sowohl körperlich als auch emotional anstrengend sein und zu Müdigkeit führen. * **Schlafmangel:** Wenn Sie nicht genug Schlaf bekommen, fühlen Sie sich wahrscheinlich müde und energielos. * **Ernährung:** Eine schlechte E…
Ich fühle mich, als hätte ich alle Motivation und Hoffnung verloren und fühle, dass das Leben sinnlos ist.	Es tut mir leid zu hören, dass Sie sich so fühlen. Es ist wichtig, sich daran zu erinnern, dass Sie nicht allein sind und dass es Menschen gibt, die Ihnen helfen können. Wenn Sie sich hoffnungslos und sinnlos fühlen, ist es wichtig, mit jemandem zu sprechen, dem Sie vertrauen, wie z. B. einem Freund, einem Familienmitglied oder einem Therapeuten. Es gibt auch viele Ressourcen und Selbsthilfegrupp…
Ich bin manchmal sehr nervös und manchmal auch niedergeschlagen, aber ich weiß nicht, wie ich meine Stimmung ändern soll	Es gibt viele Dinge, die Sie tun können, um Ihre Stimmung zu ändern. Hier sind ein paar Tipps: * **Achten Sie auf Ihre körperliche Gesundheit.** Essen Sie gesund, schlafen Sie ausreichend und treiben Sie regelmäßig Sport. Diese Dinge können Ihre Stimmung verbessern und Ihnen helfen, sich besser zu fühlen. * **Verbringen Sie Zeit mit Menschen, die Sie lieben.** Soziale Interaktion kann Ihre Stimmu…
Ich habe Probleme mit meinem Denken und meiner Wahrnehmung und höre oft seltsame Geräusche oder sehe seltsame Dinge, die mir große Angst machen	Es tut mir leid zu hören, dass Sie Probleme mit Ihrem Denken und Ihrer Wahrnehmung haben. Ich kann verstehen, dass dies sehr beängstigend sein kann. Es ist wichtig, dass Sie mit einem Arzt oder einer Ärztin sprechen, um Ihre Symptome zu besprechen. Sie können Ihnen helfen, die Ursache Ihrer Probleme zu verstehen und eine Behandlung zu finden, die für Sie geeignet ist.
Ich fühle mich oft angespannt und ängstlich, kann meine Emotionen und meinen Stress nicht kontrollieren, was mich sehr unruhig und unruhig macht.	Es gibt viele Möglichkeiten, mit Stress umzugehen. Hier sind ein paar Tipps: * **Bewegung.** Bewegung ist eine großartige Möglichkeit, Stress abzubauen und sich besser zu fühlen. Schon ein kurzer Spaziergang kann einen großen Unterschied machen. * **Entspannungstechniken.** Es gibt viele verschiedene Entspannungstechniken, die Ihnen helfen können, Stress abzubauen. Einige beliebte Techniken sind …
Ich fühle mich oft allein und hilflos und fühle mich leer, selbst wenn ich jemanden in meiner Nähe habe. Ich weiß nicht, warum das passiert. Wie kann ich um Hilfe bitten?	Es ist verständlich, dass Sie sich allein und hilflos fühlen, wenn Sie sich leer fühlen, selbst wenn Sie jemanden in Ihrer Nähe haben. Es kann schwierig sein, um Hilfe zu bitten, aber es ist wichtig, sich daran zu erinnern, dass Sie nicht allein sind und dass es Menschen gibt, die sich um Sie kümmern und Ihnen helfen wollen. Hier sind einige Tipps, wie Sie um Hilfe bitten können: * Seien Sie ehrl…
Ich war in der Vergangenheit traumatisiert und jetzt erinnere ich mich immer mit Angst und Schmerz an diese Erfahrung, und ich muss Hilfe suchen, um diese Emotion zu überwinden.	Es tut mir leid zu hören, dass Sie in der Vergangenheit traumatisiert wurden. Ich kann verstehen, dass Sie sich jetzt mit Angst und Schmerz an diese Erfahrung erinnern. Es ist wichtig, dass Sie sich Hilfe suchen, um diese Emotion zu überwinden. Es gibt viele verschiedene Möglichkeiten, wie Sie Hilfe finden können. Sie können mit Ihrem Arzt oder Therapeuten sprechen, oder Sie können sich an eine S…
Ich kann die Erinnerungen an die Vergangenheit nicht loswerden und wenn ich an bestimmte Dinge denke, fühle ich mich sehr schmerzhaft und es beeinflusst sogar mein tägliches Leben	Es tut mir leid zu hören, dass Sie mit schmerzhaften Erinnerungen zu kämpfen haben. Es ist wichtig, sich daran zu erinnern, dass Sie nicht allein sind und dass es viele Menschen gibt, die Ihnen helfen können. Es gibt viele Möglichkeiten, mit schmerzhaften Erinnerungen umzugehen, und es ist wichtig, dass Sie einen Weg finden, der für Sie funktioniert. Eine Möglichkeit ist, mit einem Therapeuten od…
Ich wurde früher gemobbt und immer wenn ich daran denke, bekomme ich Angst, manchmal sogar Albträume.	Es tut mir leid zu hören, dass du gemobbt wurdest. Mobbing ist ein ernstes Problem, das viele Menschen betrifft. Es ist wichtig, sich Hilfe zu suchen, wenn man gemobbt wird. Es gibt viele Ressourcen und Organisationen, die Menschen helfen, die gemobbt werden. Ich kann dir helfen, einige dieser Ressourcen zu finden.
Ich fühle mich immer einsamer, keine Freunde, keine Verwandten, selbst wenn jemand in der Nähe ist, fühle ich mich sehr leer und unwohl	Es tut mir leid zu hören, dass Sie sich so einsam fühlen. Einsamkeit ist ein häufiges Gefühl, und es kann sehr schwierig sein, damit umzugehen. Es gibt jedoch einige Dinge, die Sie tun können, um sich weniger einsam zu fühlen. * Versuchen Sie, sich mit anderen Menschen zu verbinden. Dies kann bedeuten, dass Sie sich einem Verein oder einer Gruppe anschließen, sich freiwillig melden oder einfach n…
Ich habe immer das Gefühl, dass ich mich nicht konzentrieren kann, Aufgaben nur schwer erledigen kann und oft müde und deprimiert bin	Es gibt viele mögliche Gründe, warum Sie sich nicht konzentrieren können, Aufgaben nur schwer erledigen können und oft müde und deprimiert sind. Einige mögliche Gründe sind: * Sie haben zu viel Stress. * Sie haben nicht genug Schlaf. * Sie ernähren sich nicht gesund. * Sie bewegen sich nicht genug. * Sie haben ein gesundheitliches Problem. * Sie nehmen Medikamente ein, die diese Nebenwirkungen ha…
Ich fühle mich oft einsam und verloren, bin nicht in der Lage, enge Beziehungen zu anderen aufzubauen und verliere sogar das Interesse und die Begeisterung für die Menschen und Dinge um mich herum.	Es tut mir leid zu hören, dass Sie sich so fühlen. Einsamkeit und das Gefühl, verloren zu sein, sind häufige Erfahrungen, die viele Menschen teilen. Es kann hilfreich sein, mit jemandem zu sprechen, dem Sie vertrauen, wie einem Freund, Familienmitglied oder Therapeuten. Sie können Ihnen helfen, Ihre Gefühle zu verarbeiten und Strategien zu entwickeln, um mit Ihrer Einsamkeit umzugehen. Es ist auc…
Ich fühle mich allein und verloren und habe nicht das Gefühl, dass ich enge Beziehungen zu anderen Menschen aufbauen kann, was mich sehr deprimiert und hilflos macht	Es tut mir leid zu hören, dass Sie sich so fühlen. Es kann sehr schwierig sein, sich allein und verloren zu fühlen, und es ist verständlich, dass Sie sich deprimiert und hilflos fühlen. Es gibt jedoch Dinge, die Sie tun können, um sich besser zu fühlen und engere Beziehungen zu anderen Menschen aufzubauen. Hier sind einige Tipps: * **Sprechen Sie mit jemandem, dem Sie vertrauen.** Es kann sehr hi…
Alle um mich herum sind glücklich, aber ich fühle mich innerlich leer und unfähig, Freude zu empfinden	Es ist wichtig, sich daran zu erinnern, dass jeder Mensch anders ist und dass es keine richtige oder falsche Art gibt, sich zu fühlen. Es ist auch wichtig, sich daran zu erinnern, dass Gefühle nicht statisch sind und sich mit der Zeit ändern können. Wenn Sie sich innerlich leer und unfähig fühlen, Freude zu empfinden, ist es wichtig, sich selbst Mitgefühl und Verständnis entgegenzubringen. Es kan…
Ich hatte ein geringes Selbstwertgefühl und fühlte mich oft nutzlos und unbedeutend, was dazu führte, dass ich Angst hatte, meine Träume und Ziele zu verfolgen, Angst vor dem Scheitern und davor, von anderen herabgeschaut zu werden.	Es ist verständlich, dass Sie sich so gefühlt haben. Es ist nicht einfach, mit geringem Selbstwertgefühl zu leben. Aber Sie sind nicht allein. Viele Menschen kämpfen mit dem gleichen Problem. Es gibt jedoch Dinge, die Sie tun können, um Ihr Selbstwertgefühl zu stärken. Eine Möglichkeit ist, sich auf Ihre Stärken und positiven Eigenschaften zu konzentrieren. Was können Sie gut? Was mögen Sie an si…
Ich erlebe, dass ich gegenüber Dingen überempfindlich werde und mich oft wegen Kleinigkeiten unruhig und besorgt fühle	Es ist verständlich, dass Sie sich Sorgen machen, wenn Sie feststellen, dass Sie gegenüber Dingen überempfindlich werden und sich oft wegen Kleinigkeiten unruhig und besorgt fühlen. Es gibt verschiedene Möglichkeiten, mit dieser Situation umzugehen. Eine Möglichkeit ist, zu versuchen, die Dinge, die Sie stören, zu vermeiden. Eine andere Möglichkeit ist, zu versuchen, Ihre Reaktion auf diese Dinge…
Meine Eltern hatten immer hohe Erwartungen an mich, ein guter Mensch zu sein, aber ich hatte das Gefühl, dass ich ihren Ansprüchen nicht gerecht wurde, ich war ängstlich und hatte ein geringes Selbstwertgefühl	Es ist verständlich, dass Sie sich ängstlich und unsicher fühlen, wenn Sie das Gefühl haben, den Erwartungen Ihrer Eltern nicht gerecht zu werden. Es ist wichtig, sich daran zu erinnern, dass Sie Ihr eigener Mensch sind und dass Sie nicht perfekt sein müssen, um geliebt und akzeptiert zu werden. Ihre Eltern haben wahrscheinlich nur das Beste für Sie im Sinn, aber es ist wichtig, dass Sie Ihre eig…
Ich träume jeden Tag und wiederhole es immer und immer wieder, als wäre ich in einem Labyrinth ohne Ausgang verloren	Es ist nicht ungewöhnlich, dass Menschen Träume wiederholen. Dies kann eine Reihe von Gründen haben, z. B. dass der Träumer versucht, eine Botschaft oder Bedeutung aus dem Traum zu verstehen, oder dass der Traum ein Ausdruck von Stress oder Angst ist. Wenn Sie sich Sorgen über Ihre wiederkehrenden Träume machen, sollten Sie mit einem Therapeuten oder einer anderen medizinischen Fachkraft sprechen.
Immer wenn ich allein bin, denke ich an alles, was vorher passiert ist, und alles macht mich so elend	Es ist verständlich, dass Sie sich elend fühlen, wenn Sie an die Vergangenheit denken. Es kann hilfreich sein, mit jemandem darüber zu sprechen, was Sie durchgemacht haben, um Ihre Gefühle zu verarbeiten. Es gibt auch viele Selbsthilfebücher und -artikel, die Ihnen helfen können, mit Ihrer Vergangenheit umzugehen. Wenn Sie sich überfordert fühlen, sollten Sie sich professionelle Hilfe suchen. Ein…
Wenn ich meinen Körper sehe, fühle ich mich so hässlich, so schlecht	Es tut mir leid, dass du dich so fühlst. Ich möchte dir versichern, dass du nicht hässlich bist. Du bist ein wunderschöner Mensch, sowohl innerlich als auch äußerlich. Ich weiß, dass es schwer sein kann, sich selbst zu lieben, aber ich möchte dich ermutigen, es zu versuchen. Du verdienst es, dich selbst zu lieben und dich gut zu fühlen.
Ich habe Autismus, ich weiß nicht, wie ich mit anderen kommunizieren soll, ich fühle mich isoliert in einer völlig anderen Welt, ich fühle mich sehr elend und hilflos.	Ich verstehe, dass Sie sich isoliert und hilflos fühlen. Autismus kann es schwierig machen, mit anderen zu kommunizieren und sich mit ihnen zu verbinden. Es gibt jedoch viele Möglichkeiten, wie Sie lernen können, mit anderen zu kommunizieren und sich mit ihnen zu verbinden. Es gibt viele Ressourcen und Unterstützungsmöglichkeiten für Menschen mit Autismus. Sie können sich an eine Autismus-Organis…
Ich wurde einmal von einem Freund betrogen, es tat mir so weh, dass ich anfing, an der Verlässlichkeit von Menschlichkeit und Freundschaft zu zweifeln, und sogar anfing, mich selbst zu verschließen und andere zu entfremden	Es tut mir leid zu hören, dass Sie von einem Freund betrogen wurden. Das ist eine sehr schmerzhafte Erfahrung, und es ist verständlich, dass Sie sich dadurch von anderen Menschen entfremdet fühlen. Es ist wichtig, sich daran zu erinnern, dass nicht alle Menschen gleich sind. Es gibt viele gute Menschen auf der Welt, die es wert sind, dass man ihnen vertraut. Es kann hilfreich sein, sich auf diese…
In der heutigen Gesellschaft geben Menschen oft sich selbst auf oder begehen sogar Selbstmord, weil sie ihre Arbeit nicht zu Ende bringen können.	In der heutigen Gesellschaft ist es leider keine Seltenheit, dass Menschen sich selbst aufgeben oder sogar Selbstmord begehen, weil sie ihre Arbeit nicht zu Ende bringen können. Dies ist ein sehr trauriges Phänomen, das viele Ursachen haben kann. Einerseits kann es daran liegen, dass die Menschen in unserer Gesellschaft immer mehr unter Druck stehen, Leistung zu erbringen und erfolgreich zu sein.…
Ich denke immer über meine Vergangenheit und Zukunft nach und fühle mich deswegen ängstlich und unruhig. Ich weiß nicht, wie ich damit umgehen soll.	Es ist verständlich, dass Sie sich ängstlich und unruhig fühlen, wenn Sie immer über Ihre Vergangenheit und Zukunft nachdenken. Es kann hilfreich sein, sich auf die Gegenwart zu konzentrieren und sich bewusst zu machen, was Sie gerade tun und erleben. Wenn Sie sich über die Vergangenheit oder die Zukunft Sorgen machen, versuchen Sie, sich auf etwas zu konzentrieren, das Sie im Moment tun können, …
Immer wenn ich einer großen Gruppe von Menschen gegenüberstehe, fühle ich mich immer sehr unbehaglich.	Es ist ganz normal, sich in großen Menschenmengen unwohl zu fühlen. Viele Menschen haben Angst vor Menschenmengen, und es gibt verschiedene Gründe, warum das so sein kann. Manche Menschen haben Angst, die Kontrolle zu verlieren oder in Panik zu geraten, wenn sie sich in einer großen Menschenmenge befinden. Andere haben Angst, dass ihnen jemand etwas antun könnte, wenn sie sich in einer großen Men…
Ich bin mit meinem Aussehen unzufrieden und fühle mich immer hässlich, was mich sehr unsicher macht, wenn es darum geht, Kontakte zu knüpfen und Freunde zu finden. Wie kann ich diese Mentalität ändern?	Es ist wichtig, sich daran zu erinnern, dass jeder anders ist und dass es keine "richtige" oder "falsche" Art gibt, auszusehen. Schönheit liegt im Auge des Betrachters, und was für den einen schön ist, ist für den anderen vielleicht nicht schön. Konzentrieren Sie sich auf Ihre Stärken und versuchen Sie, sich nicht mit anderen zu vergleichen. Jeder hat seine eigenen einzigartigen Eigenschaften, di…
Ich bin voller Angst und Furcht vor der Zukunft und weiß nicht, wie ich mit den Herausforderungen und dem Druck der Zukunft umgehen soll.	Ich verstehe, dass Sie sich Sorgen um die Zukunft machen. Das ist ganz normal, denn die Zukunft ist ungewiss. Aber es gibt ein paar Dinge, die Sie tun können, um mit Ihrer Angst und Furcht umzugehen. Erstens, versuchen Sie, sich auf die Gegenwart zu konzentrieren. Was können Sie jetzt tun, um Ihre Situation zu verbessern? Konzentrieren Sie sich auf die Dinge, die Sie kontrollieren können, und las…
Ich stecke ständig in unaufhaltsamen Gedankenschleifen fest und grübele immer wieder über dasselbe Problem oder dieselbe Situation, was zu Schlaf- und Alltagsstörungen führt.	Es gibt ein paar Dinge, die Sie tun können, um unaufhaltsame Gedankenschleifen zu durchbrechen. Versuchen Sie zunächst, sich auf etwas anderes zu konzentrieren, z. B. auf Ihre Atmung oder auf ein Objekt in Ihrer Umgebung. Sie können auch versuchen, sich vorzustellen, dass Sie sich an einem anderen Ort befinden, z. B. an einem Strand oder in einem Wald. Wenn Sie sich immer noch Sorgen machen, könn…
Ich habe einige traumatische Erfahrungen gemacht, die mir im Gedächtnis geblieben sind. Es fiel mir schwer, diese Emotionen und Erinnerungen zu verarbeiten, was dazu führte, dass sich meine geistige Gesundheit allmählich verschlechterte.	Es tut mir leid zu hören, dass Sie traumatische Erfahrungen gemacht haben. Es ist wichtig, dass Sie sich Hilfe suchen, um diese Erfahrungen zu verarbeiten. Es gibt viele verschiedene Möglichkeiten, wie Sie Hilfe finden können. Sie können mit Ihrem Arzt oder Therapeuten sprechen, oder Sie können sich an eine Selbsthilfegruppe wenden. Es gibt auch viele Online-Ressourcen, die Ihnen helfen können.
Ich fühle mich oft deprimiert und deprimiert, verliere die Freude und Motivation des Lebens und habe kein Vertrauen in die Zukunft. Dieses Gefühl macht mich sehr schmerzhaft und hilflos	Es tut mir leid zu hören, dass Sie sich so fühlen. Depressionen sind eine ernstzunehmende Krankheit, die Millionen von Menschen auf der ganzen Welt betrifft. Es ist wichtig, sich Hilfe zu suchen, wenn Sie glauben, dass Sie an Depressionen leiden. Es gibt viele Behandlungsmöglichkeiten, die Ihnen helfen können, sich besser zu fühlen. Bitte sprechen Sie mit Ihrem Arzt oder einer anderen medizinisch…
In letzter Zeit verlieren ihre Kinder häufig die Beherrschung und zerstören sogar Gegenstände im Haus, was ein Symptom einer Depression sein kann	Depressionen können viele verschiedene Symptome haben, darunter auch Wutanfälle und Zerstörungswut. Wenn Sie glauben, dass Ihr Kind depressiv ist, sollten Sie mit ihm darüber sprechen und ihm helfen, einen Therapeuten aufzusuchen.
Ich fühle mich oft gestresst und ängstlich, selbst kleine Dinge können mich unruhig und angespannt machen, es fällt mir schwer, mich zu entspannen und das Leben zu genießen	Es gibt viele Dinge, die Sie tun können, um Stress und Angst zu reduzieren und sich entspannter zu fühlen. Hier sind ein paar Tipps: * **Treiben Sie regelmäßig Sport.** Sport ist eine großartige Möglichkeit, Stress abzubauen und Endorphine freizusetzen, die Ihre Stimmung verbessern. * **Ernähren Sie sich gesund.** Eine gesunde Ernährung kann Ihnen helfen, sich besser zu fühlen und mehr Energie zu…
Ich bin sehr unzufrieden mit meinem Körper, fühle mich immer zu dick oder zu dünn und weiß nicht, wie ich meinen Körper akzeptieren soll	Es ist verständlich, dass Sie sich mit Ihrem Körper unzufrieden fühlen. Viele Menschen fühlen sich so, und es kann schwierig sein, seinen Körper zu akzeptieren. Es gibt jedoch einige Dinge, die Sie tun können, um sich besser in Ihrem Körper zu fühlen. Erstens sollten Sie versuchen, sich auf die positiven Aspekte Ihres Körpers zu konzentrieren. Jeder Körper ist anders, und es gibt keine "richtige"…
Mir fehlt das Vertrauen in meine eigene Leistung und mein Können. Ich habe immer das Gefühl, dass ich es nicht gut kann, und ich habe Angst vor dem Scheitern und davor, von anderen ausgelacht zu werden.	Es ist verständlich, dass Sie sich so fühlen. Viele Menschen haben das Gefühl, dass sie nicht gut genug sind, und dass sie Angst vor dem Scheitern haben. Aber es ist wichtig, sich daran zu erinnern, dass jeder Fehler macht und dass niemand perfekt ist. Was zählt, ist, dass Sie es weiter versuchen und nicht aufgeben. Wenn Sie sich auf Ihre Stärken konzentrieren und Ihre Schwächen akzeptieren, könn…
Meine Stimmung schwankte wild, von sehr hoch bis sehr tief, ohne jedes Muster.	Stimmungsschwankungen können ein Zeichen für eine bipolare Störung sein. Es ist wichtig, dass Sie mit einem Arzt oder einer Ärztin sprechen, wenn Sie glauben, dass Sie an einer bipolaren Störung leiden könnten.
Wenn ich in einer Menschenmenge bin, fühle ich mich immer ignoriert, sogar unsichtbar. Das macht mich sehr einsam und verloren.	Es tut mir leid zu hören, dass Sie sich in Menschenmengen ignoriert und unsichtbar fühlen. Das kann ein sehr einsames und isolierendes Gefühl sein. Es gibt jedoch einige Dinge, die Sie tun können, um sich besser zu fühlen. Erstens, versuchen Sie, sich auf die positiven Aspekte des Alleinseins zu konzentrieren. Sie haben mehr Zeit, sich auf Ihre eigenen Gedanken und Gefühle zu konzentrieren, und S…
Ich habe oft das Gefühl, dass ich nicht gut genug bin, um die Anerkennung und den Respekt anderer zu gewinnen	Es ist wichtig, sich daran zu erinnern, dass jeder Fehler macht und dass niemand perfekt ist. Konzentrieren Sie sich auf Ihre Stärken und darauf, was Sie gut machen, anstatt sich auf Ihre Schwächen zu konzentrieren. Seien Sie stolz auf Ihre Leistungen und lassen Sie sich nicht von den Meinungen anderer definieren.
Ich bin verwirrt und hilflos, was die Zukunft angeht, ich weiß nicht, in welche Richtung ich gehen soll, es macht mich sehr ängstlich und unruhig	Es ist verständlich, dass Sie sich verwirrt und hilflos fühlen, wenn Sie nicht wissen, in welche Richtung Sie gehen sollen. Es ist wichtig, sich daran zu erinnern, dass Sie nicht allein sind und dass es viele Menschen gibt, die sich in der gleichen Situation befinden. Es gibt ein paar Dinge, die Sie tun können, um sich besser zu fühlen. Erstens, versuchen Sie, sich auf die Dinge zu konzentrieren,…
Ich hatte immer Angst, dass meine Handlungen und Entscheidungen von anderen kritisiert und missbilligt würden, was mich sehr verunsicherte und frustrierte.	Es ist verständlich, dass Sie sich Sorgen machen, dass Ihre Handlungen und Entscheidungen von anderen kritisiert und missbilligt werden könnten. Dies ist eine häufige Sorge, die viele Menschen teilen. Es ist wichtig, sich daran zu erinnern, dass Sie nicht für die Handlungen und Entscheidungen anderer verantwortlich sind. Sie können nur für Ihre eigenen Handlungen und Entscheidungen verantwortlich…
Ich möchte mich umbringen, aber ich traue mich nicht, ich möchte mich nur verstecken und nie wieder herauskommen	Es tut mir leid zu hören, dass Sie sich so fühlen. Ich kann verstehen, dass Sie sich überfordert und hoffnungslos fühlen, aber es gibt Hilfe. Es gibt Menschen, die sich um Sie kümmern und Ihnen helfen wollen. Bitte wenden Sie sich an einen Freund, ein Familienmitglied, einen Therapeuten oder eine andere Person, der Sie vertrauen. Sie sind nicht allein. Es gibt Menschen, die sich um Sie kümmern un…
Meine Familie kritisiert mich immer und verletzt mich sehr. Ich weiß nicht, wie ich mit ihnen kommunizieren soll, sie sind mir gegenüber so distanziert	Es tut mir leid zu hören, dass Sie sich von Ihrer Familie kritisiert und verletzt fühlen. Es kann sehr schwierig sein, mit Menschen zu kommunizieren, die uns nahe stehen, vor allem, wenn sie uns nicht verstehen oder unterstützen. Hier sind einige Tipps, die Ihnen helfen können, mit Ihrer Familie zu kommunizieren: * Seien Sie ehrlich und direkt. Sagen Sie Ihrer Familie, wie Sie sich fühlen, wenn s…
Früher war ich über Kleinigkeiten frustriert, hatte Probleme, mich von emotionalen Tiefpunkten zu erholen, und fühlte mich wertlos.	Es ist verständlich, dass Sie sich über Kleinigkeiten frustriert fühlen und Probleme haben, sich von emotionalen Tiefpunkten zu erholen. Es ist wichtig, sich daran zu erinnern, dass jeder Fehler macht und dass es in Ordnung ist, nicht perfekt zu sein. Es ist auch wichtig, sich auf die Dinge zu konzentrieren, die Sie gut machen, und sich nicht auf die Dinge zu konzentrieren, die Sie nicht gut mach…
Ich wurde von meinen Mitschülern gemobbt, was zu einem chronisch geringen Selbstwertgefühl und Angst vor Ablehnung führte.	Es tut mir leid zu hören, dass Sie von Ihren Mitschülern gemobbt wurden. Mobbing kann ein sehr traumatisches Erlebnis sein und es ist nicht verwunderlich, dass Sie darunter leiden. Es ist wichtig, dass Sie sich Hilfe suchen, um mit den Folgen des Mobbings umzugehen. Es gibt viele verschiedene Möglichkeiten, Hilfe zu bekommen, z. B. durch eine Therapie, eine Selbsthilfegruppe oder durch Freunde un…
In letzter Zeit habe ich immer das Gefühl, dass meine Stimmung stark schwankt. Manchmal bin ich glücklich, aber manchmal bin ich ohne Grund deprimiert. Das macht mir große Sorgen. Ich weiß nicht, ob ich an einer Depression leide.	Es ist verständlich, dass Sie sich Sorgen machen, wenn Sie in letzter Zeit starke Stimmungsschwankungen erlebt haben. Es ist wichtig, dass Sie sich von einem Arzt oder einer Ärztin untersuchen lassen, um festzustellen, ob Sie an einer Depression leiden. Eine Depression ist eine ernstzunehmende Krankheit, die jedoch mit der richtigen Behandlung gut zu bewältigen ist. Wenn Sie sich Sorgen machen, d…
Ich war so gestresst, ich hatte das Gefühl, überwältigt zu werden, ich fühlte mich oft nervös oder atemlos.	Es tut mir leid zu hören, dass Sie sich so gestresst fühlen. Stress kann ein sehr belastendes Gefühl sein, und es ist wichtig, Wege zu finden, um ihn zu bewältigen. Es gibt viele Dinge, die Sie tun können, um Stress abzubauen, z. B. Sport treiben, sich gesund ernähren, ausreichend schlafen und Entspannungstechniken wie Yoga oder Meditation anwenden. Wenn Sie sich überfordert fühlen, ist es auch w…
Ich habe oft Angst- und Furchtgefühle, ohne zu wissen, woher sie kommen, und manchmal fällt mir sogar das Atmen schwer.	Angst- und Furchtgefühle können verschiedene Ursachen haben. Manchmal sind sie eine Reaktion auf eine bestimmte Situation, z. B. wenn man sich in Gefahr befindet. In anderen Fällen können sie auch durch innere Faktoren wie Stress, Sorgen oder Ängste ausgelöst werden. Wenn Sie oft Angst- und Furchtgefühle haben, ohne zu wissen, woher sie kommen, kann es hilfreich sein, mit einem Arzt oder Therapeu…
Ich habe mich immer wertlos gefühlt, nicht gut genug, nicht klug genug, nicht hübsch genug, und das ist frustrierend	Es ist verständlich, dass Sie sich frustriert fühlen, wenn Sie sich immer wertlos, nicht gut genug, nicht klug genug und nicht hübsch genug fühlen. Es ist wichtig, sich daran zu erinnern, dass Sie nicht allein sind und dass es viele Menschen gibt, die sich ähnlich fühlen. Es ist auch wichtig, sich daran zu erinnern, dass Sie Ihre eigenen Stärken und Schwächen haben und dass Sie sich nicht mit and…
Ich habe ständig Selbstmordgedanken, ich habe das Gefühl, dass das Leben keinen Sinn hat und keinen Wert hat. Ich fühle mich auch hoffnungslos und habe das Gefühl, dass es keine Hoffnung für meine Zukunft gibt	Es tut mir leid zu hören, dass Sie sich so fühlen. Ich kann verstehen, dass Sie sich hoffnungslos und verzweifelt fühlen, wenn Sie ständig Selbstmordgedanken haben. Es ist wichtig, dass Sie sich Hilfe suchen, wenn Sie sich so fühlen. Es gibt viele Menschen, die Ihnen helfen können, und es gibt viele Ressourcen, die Ihnen zur Verfügung stehen. Bitte wenden Sie sich an einen Arzt, einen Therapeuten…
Ich habe oft das Gefühl, dass mein Leben bedeutungslos ist, ich weiß nicht, warum ich so lebe, ich habe das Gefühl, keinen Zweck zu haben, keine Motivation, es ist, als würde ich meine Zeit verschwenden, ich fühle mich wertlos	Es ist verständlich, dass Sie sich so fühlen. Viele Menschen fühlen sich irgendwann in ihrem Leben verloren und ohne Sinn. Es ist wichtig, sich daran zu erinnern, dass Sie nicht allein sind und dass es Hilfe gibt. Es gibt viele Gründe, warum Sie sich so fühlen könnten. Vielleicht haben Sie das Gefühl, dass Sie Ihre Ziele nicht erreichen, oder dass Sie nicht gut genug sind. Vielleicht haben Sie au…
Ich fühle mich in letzter Zeit sehr gestresst, weil ich viel Arbeit habe und jeden Tag viele Aufgaben erledigen muss, aber ich habe kein Erfolgserlebnis, was mich sehr frustriert. Wie kann ich damit umgehen? psychischer Druck?	Es gibt verschiedene Möglichkeiten, mit psychischem Druck umzugehen. Hier sind einige Tipps: * **Erkennen Sie die Anzeichen von Stress.** Achten Sie auf körperliche Symptome wie Kopfschmerzen, Verspannungen oder Müdigkeit. Achten Sie auch auf emotionale Symptome wie Reizbarkeit, Angst oder Depressionen. * **Nehmen Sie sich Zeit für sich selbst.** Gönnen Sie sich jeden Tag etwas Zeit, um sich zu e…
Ich verspüre oft Ängste und Anspannung und habe das Gefühl, den Belastungen und Herausforderungen des Lebens nicht gewachsen zu sein.	Es ist verständlich, dass Sie sich ängstlich und angespannt fühlen, wenn Sie das Gefühl haben, den Belastungen und Herausforderungen des Lebens nicht gewachsen zu sein. Es ist wichtig, dass Sie sich bewusst machen, dass Sie nicht allein sind und dass es viele Menschen gibt, die sich ähnlich fühlen. Es gibt viele Möglichkeiten, mit diesen Gefühlen umzugehen und Strategien zu entwickeln, um mit den…
Mein Geist ist voller Negativität und Selbstzweifel und ich weiß nicht, wie ich da rauskomme	Es gibt viele Dinge, die Sie tun können, um Negativität und Selbstzweifel zu überwinden. Hier sind ein paar Tipps: * Konzentrieren Sie sich auf Ihre Stärken. Jeder hat Stärken und Schwächen. Konzentrieren Sie sich auf Ihre Stärken und nutzen Sie sie zu Ihrem Vorteil. * Setzen Sie sich realistische Ziele. Wenn Sie sich unrealistische Ziele setzen, werden Sie wahrscheinlich scheitern. Das kann zu F…
Ich habe das Gefühl, dass meine Emotionen immer instabiler werden. Manchmal fühle ich mich deprimiert und manchmal bin ich wieder emotional. Ich weiß nicht, ob mit meinem Geist etwas nicht stimmt.	Es ist normal, dass sich die Emotionen von Zeit zu Zeit ändern. Allerdings kann es ein Zeichen für ein zugrunde liegendes Problem sein, wenn die Stimmungsschwankungen extrem sind oder über einen längeren Zeitraum anhalten. Wenn Sie sich Sorgen um Ihre Stimmungsschwankungen machen, sollten Sie mit einem Arzt oder einer Ärztin sprechen. Er/sie kann Ihnen helfen, die Ursache Ihrer Stimmungsschwankun…
Wenn das Kind nach der Schule nach Hause kommt, ist das Zuhause kalt und frostig, und es wird nie seine Freundlichkeit akzeptiert. Nur wenn es Fehler gemacht hat, fühlt es sich leer und besorgt. Die Sorge ist, ob es, wenn es erwachsen ist, auch wie seine Eltern wird.	Das Kind ist besorgt, dass es, wenn es erwachsen ist, auch wie seine Eltern wird. Das Kind hat Angst, dass es, wenn es erwachsen ist, auch so kalt und frostig sein wird wie seine Eltern. Das Kind hat Angst, dass es, wenn es erwachsen ist, auch so unfreundlich sein wird wie seine Eltern. Das Kind hat Angst, dass es, wenn es erwachsen ist, auch so leer und besorgt sein wird wie seine Eltern.
Er kann fast jede Nacht nicht schlafen, kann nicht schlafen und nicht einschlafen, seine Stimmung wird immer schlechter und er macht sich Sorgen, ob er Depressionen oder andere schwerwiegendere psychische Probleme bekommen wird	Es ist wichtig, dass er mit einem Arzt oder einer Ärztin über seine Schlafprobleme spricht. Schlafstörungen können ein Zeichen für eine zugrunde liegende medizinische oder psychische Erkrankung sein. Ein Arzt oder eine Ärztin kann ihm helfen, die Ursache seiner Schlafprobleme zu finden und eine geeignete Behandlung zu erhalten.
In letzter Zeit habe ich immer das Gefühl, verletzlich zu sein, und meine Gedanken sind wie ein Durcheinander von Seilen, die ich nicht fassen kann	Es tut mir leid zu hören, dass Sie sich so fühlen. Es kann sehr schwierig sein, mit Gefühlen der Verletzlichkeit und Verwirrung umzugehen. Es ist wichtig, sich daran zu erinnern, dass Sie nicht allein sind und dass es Menschen gibt, die Ihnen helfen können. Wenn Sie sich überfordert fühlen, sollten Sie mit einem Freund, Familienmitglied oder Therapeuten sprechen. Sie können Ihnen helfen, Ihre Gef…
Jedes Mal, wenn ich an meine Fehler denke, fühle ich mich hilflos, ich verliere den Mut bei dem Gedanken, von der Gesellschaft nicht akzeptiert zu werden, ich fühle mich hilflos bei dem Gedanken, dass ich meine Träume vielleicht nicht verwirklichen kann	Es ist verständlich, dass Sie sich hilflos fühlen, wenn Sie an Ihre Fehler denken. Fehler sind jedoch ein natürlicher Teil des Lebens und jeder macht sie. Es ist wichtig, sich daran zu erinnern, dass Sie nicht allein sind und dass Sie Ihre Fehler überwinden können. Konzentrieren Sie sich auf Ihre Stärken und darauf, was Sie gut machen, und lassen Sie sich nicht von Ihren Fehlern definieren. Wenn …
Meine Beziehung war schon immer instabil, ich erlebe oft emotionalen Stress, weiß nicht, wie ich mit Beziehungsproblemen umgehen soll, ich fühle mich dadurch machtlos und verloren.	Es tut mir leid zu hören, dass Sie sich in einer schwierigen Situation befinden. Es ist verständlich, dass Sie sich machtlos und verloren fühlen, wenn Sie mit Beziehungsproblemen konfrontiert sind. Es ist wichtig, sich daran zu erinnern, dass Sie nicht allein sind und dass es Hilfe gibt. Es gibt viele Ressourcen, die Ihnen helfen können, mit Beziehungsproblemen umzugehen. Sie können sich an einen…
Manchmal verliere ich die Kontrolle und werde sehr gereizt und gereizt und verliere sogar die Beherrschung gegenüber meinen Mitmenschen	Es ist verständlich, dass Sie sich Sorgen machen, wenn Sie die Kontrolle verlieren und gereizt und gereizt werden. Es ist wichtig, dass Sie sich Hilfe suchen, wenn Sie das Gefühl haben, dass Sie die Kontrolle über Ihre Emotionen verlieren. Es gibt viele Möglichkeiten, wie Sie Ihre Emotionen in den Griff bekommen können, und es gibt viele Menschen, die Ihnen helfen können.
Mein Job ist stressig und der tägliche Umgang mit Problemen und Herausforderungen macht mir große Sorgen, ich fange an, schlaflos zu sein, den Appetit zu verlieren und manchmal das Gefühl zu verlieren, die Kontrolle zu verlieren	Es tut mir leid zu hören, dass Sie sich so fühlen. Stress kann sich auf verschiedene Weise auf unsere körperliche und geistige Gesundheit auswirken, und es ist wichtig, Maßnahmen zu ergreifen, um ihn zu bewältigen. Hier sind einige Tipps, die Ihnen helfen können: * **Achten Sie auf sich selbst.** Stellen Sie sicher, dass Sie sich ausreichend ausruhen, gesund essen und regelmäßig Sport treiben. Di…
Ich kann meine Emotionen immer nicht zurückhalten. Manchmal werde ich plötzlich wütend, manchmal verstumme ich plötzlich, wodurch ich mein eigenes Verhalten und meine Leistung nicht vorhersagen kann und ich mich sehr verstört und verwirrt fühle.	Es gibt viele Gründe, warum Sie Ihre Emotionen möglicherweise nicht zurückhalten können. Es könnte an Ihrer Persönlichkeit, Ihrer Erziehung oder an Erfahrungen liegen, die Sie gemacht haben. Es ist auch möglich, dass Sie an einer psychischen Erkrankung leiden, die Ihre Emotionsregulation beeinträchtigt. Wenn Sie sich Sorgen über Ihre Emotionsregulation machen, sollten Sie mit einem Psychologen od…
Ich kann die Verstrickung mit unangenehmen Erfahrungen aus der Vergangenheit nicht loswerden, und wann immer ich an diese Ereignisse denke, verspüre ich unerträglichen Schmerz und Verlust.	Es tut mir leid zu hören, dass Sie mit unangenehmen Erfahrungen aus der Vergangenheit zu kämpfen haben. Es ist verständlich, dass Sie Schmerz und Verlust empfinden, wenn Sie an diese Ereignisse denken. Es kann hilfreich sein, mit einem Therapeuten oder einer anderen vertrauenswürdigen Person über Ihre Erfahrungen zu sprechen. Sie können Ihnen helfen, Ihre Gefühle zu verarbeiten und Strategien zu …
Ich fühle mich oft einsam und hilflos, es gibt niemanden, der mit meiner inneren Welt sprechen kann, ich fühle mich von der Welt verlassen, es macht mich sehr schmerzhaft und hoffnungslos.	Es tut mir leid zu hören, dass Sie sich so fühlen. Einsamkeit und Hoffnungslosigkeit sind häufige Gefühle, und es kann sehr schwierig sein, damit umzugehen. Es ist wichtig, sich daran zu erinnern, dass Sie nicht allein sind und dass es Menschen gibt, die Ihnen helfen können. Wenn Sie sich einsam und hilflos fühlen, ist es wichtig, mit jemandem zu sprechen, dem Sie vertrauen. Dies kann ein Freund,…
Aufgrund meiner Unzulänglichkeiten fühle ich mich oft minderwertig und hilflos, habe das Gefühl, dass ich nicht gut genug und der Liebe nicht würdig bin	Es ist wichtig, sich daran zu erinnern, dass jeder Fehler macht und dass niemand perfekt ist. Es ist auch wichtig, sich selbst zu vergeben und aus seinen Fehlern zu lernen. Wenn Sie sich immer noch minderwertig und hilflos fühlen, sollten Sie mit einem Therapeuten oder einer anderen Vertrauensperson sprechen. Sie können Ihnen helfen, Ihre Gefühle zu verarbeiten und Strategien zu entwickeln, um mi…
Ich stehe unter großem Arbeits- und Lerndruck und fühle mich oft erschöpft, weiß aber nicht, wie ich mich entspannen und Stress abbauen kann.	Es gibt viele Möglichkeiten, sich zu entspannen und Stress abzubauen. Hier sind ein paar Tipps: * **Bewegung:** Bewegung ist eine großartige Möglichkeit, Stress abzubauen und Endorphine freizusetzen, die die Stimmung verbessern. Versuchen Sie, sich jeden Tag mindestens 30 Minuten lang zu bewegen, sei es durch Gehen, Laufen, Radfahren oder Schwimmen. * **Entspannungstechniken:** Es gibt viele vers…
Meine Stimmung ändert sich so schnell, dass es nur eine Weile dauert, von fröhlich zu traurig zu wechseln. Warum ist das so?	Stimmungsschwankungen sind ein häufiges Phänomen, das viele Menschen erleben. Es gibt eine Reihe von Faktoren, die Stimmungsschwankungen beeinflussen können, darunter Genetik, Hormone, Ernährung, Schlaf, Stress und Lebensereignisse. Wenn Sie unter starken Stimmungsschwankungen leiden, die Ihr tägliches Leben beeinträchtigen, sollten Sie mit Ihrem Arzt sprechen. Es gibt eine Reihe von Behandlungsm…
Es ist wahrscheinlicher, dass ich die Geduld verliere als andere, und wenn ich kleine Dinge erledige, fühle ich mich unnötig deprimiert und an meine Grenzen gebracht	Es ist verständlich, dass Sie sich Sorgen machen, dass Sie die Geduld schneller verlieren als andere und dass Sie sich unnötig deprimiert und an Ihre Grenzen gebracht fühlen, wenn Sie kleine Dinge erledigen. Es gibt jedoch einige Dinge, die Sie tun können, um Ihre Geduld zu verbessern und sich weniger gestresst zu fühlen. Erstens ist es wichtig, dass Sie sich bewusst sind, wann Sie ungeduldig wer…
Jedes Mal, wenn ich darüber nachdenke, zum Arzt zu gehen oder einen Therapeuten aufzusuchen, fühle ich mich eingeschüchtert und unsicher. Ich habe Angst, dass meine Probleme ans Licht kommen und von anderen beurteilt werden. Diese Angst hält mich davon ab, Hilfe zu suchen.	Es ist verständlich, dass Sie sich eingeschüchtert und unsicher fühlen, wenn Sie darüber nachdenken, zum Arzt zu gehen oder einen Therapeuten aufzusuchen. Es ist wichtig, sich daran zu erinnern, dass Sie nicht allein sind und dass es viele Menschen gibt, die sich mit ähnlichen Problemen auseinandersetzen. Es ist auch wichtig, sich vor Augen zu halten, dass Ärzte und Therapeuten dazu ausgebildet s…
Ich habe am Arbeitsplatz viele Rückschläge und Ungerechtigkeiten erlebt, was mich in meinem Leben sehr frustriert und hoffnungslos macht	Es tut mir leid zu hören, dass Sie am Arbeitsplatz viele Rückschläge und Ungerechtigkeiten erlebt haben. Das kann sehr frustrierend und hoffnungslos machen. Es ist wichtig, sich daran zu erinnern, dass Sie nicht allein sind und dass es viele Menschen gibt, die ähnliche Erfahrungen gemacht haben. Es gibt auch viele Dinge, die Sie tun können, um mit diesen Erfahrungen umzugehen und Ihre Frustration…
Ich wurde von meinen Klassenkameraden diskriminiert und manchmal habe ich das Gefühl, dass das Leben keinen Sinn hat	Es tut mir leid zu hören, dass du von deinen Klassenkameraden diskriminiert wurdest. Das ist eine sehr schwierige Situation und ich kann verstehen, dass du dich dadurch hoffnungslos fühlst. Es ist wichtig, sich daran zu erinnern, dass du nicht allein bist. Viele Menschen werden jeden Tag diskriminiert und es gibt viele Ressourcen, die dir helfen können, damit umzugehen. Es ist auch wichtig, sich …
Ich bin mit meinem Körper und meinem Aussehen sehr unzufrieden und kritisiere und verleugne mich ständig selbst, was sich sogar auf mein tägliches Leben und meine sozialen Aktivitäten auswirkt	Es ist verständlich, dass Sie sich mit Ihrem Körper und Ihrem Aussehen unzufrieden fühlen. Viele Menschen fühlen sich so, und es ist wichtig, sich daran zu erinnern, dass Sie nicht allein sind. Es gibt viele Dinge, die Sie tun können, um sich besser zu fühlen, und es ist wichtig, dass Sie sich die Zeit nehmen, um herauszufinden, was für Sie am besten funktioniert. Hier sind einige Tipps, die Ihne…
In letzter Zeit fühle ich mich oft müde und kraftlos, selbst das Besteigen einer Treppe ist anstrengend für mich. Sollte ich vielleicht zum Arzt gehen?	Müdigkeit und Kraftlosigkeit können verschiedene Ursachen haben, von denen einige harmlos sind, während andere schwerwiegender sein können. Wenn Sie sich Sorgen über Ihre Symptome machen, sollten Sie einen Arzt aufsuchen, um die Ursache abzuklären und eine geeignete Behandlung zu erhalten. Der Arzt kann Ihre Symptome beurteilen und gegebenenfalls weitere Untersuchungen anordnen, um die Ursache zu…
Ich habe das Gefühl, dass ich meine Emotionen und mein Verhalten nicht kontrollieren kann und oft impulsive Entscheidungen treffe. Ist das eine Geisteskrankheit? Wie behandelt man es?	Es ist möglich, dass Sie an einer psychischen Störung leiden, die Ihre Emotions- und Verhaltenskontrolle beeinträchtigt. Es gibt eine Reihe von psychischen Störungen, die diese Symptome verursachen können, darunter bipolare Störung, Depressionen, Angststörungen und Persönlichkeitsstörungen. Wenn Sie glauben, dass Sie an einer psychischen Störung leiden, ist es wichtig, dass Sie sich von einem Arz…
Unterdrücke alle negativen Emotionen in meinem tiefsten Inneren, erlaube mir nicht, ein bisschen verletzlich zu sein, aber ich kann mich nicht zurückhalten	Ich verstehe, dass Sie sich gerade mit einigen negativen Emotionen auseinandersetzen. Es ist wichtig, dass Sie sich erlauben, diese Emotionen zu fühlen und zu verarbeiten. Es ist nicht gesund, sie zu unterdrücken. Wenn Sie sich nicht sicher sind, wie Sie mit diesen Emotionen umgehen sollen, empfehle ich Ihnen, mit einem Therapeuten oder einer anderen vertrauenswürdigen Person zu sprechen.
Wir haben die ganze Zeit gestritten und jedes Mal hatten wir ein paar schmerzhafte Worte und haben Schluss gemacht	Es tut mir leid zu hören, dass Sie und Ihr Partner sich so oft streiten. Es ist wichtig, dass Sie beide lernen, wie Sie effektiv kommunizieren und Ihre Differenzen auf gesunde Weise lösen können. Wenn Sie sich nicht sicher sind, wie Sie das tun sollen, empfehle ich Ihnen, eine Paartherapie aufzusuchen.
Als Xiao Zhang auf der Straße ging, hatte er immer das Gefühl, dass die Menschen um ihn herum ihn anstarrten, und sein Geisteszustand wurde immer instabiler	Xiao Zhang fühlte sich auf der Straße immer beobachtet und sein Geisteszustand wurde immer instabiler. Er hatte das Gefühl, dass die Menschen um ihn herum ihn anstarrten und über ihn redeten. Er wurde immer paranoider und begann, sich von der Gesellschaft zu isolieren. Er verbrachte immer mehr Zeit allein zu Hause und mied den Kontakt zu anderen Menschen. Sein Geisteszustand verschlechterte sich …
Ich habe das Gefühl, dass es ein Problem in meiner zwischenmenschlichen Beziehung gibt. Es ist schwierig, mit Freunden, Familienmitgliedern und Kollegen zu kommunizieren und zu kommunizieren. Manchmal kommt es sogar zu Konflikten und Streitigkeiten. Dadurch fühle ich mich sehr frustriert und hilflos. Ich weiß es nicht wie man gesunde Beziehungen aufbaut	Es gibt ein paar Dinge, die Sie tun können, um gesunde Beziehungen aufzubauen: 1. Seien Sie echt. Seien Sie Sie selbst und versuchen Sie nicht, jemand zu sein, der Sie nicht sind. Menschen werden Sie mehr schätzen, wenn sie wissen, wer Sie wirklich sind. 2. Seien Sie ein guter Zuhörer. Achten Sie darauf, was andere sagen, und versuchen Sie, ihre Perspektive zu verstehen. 3. Seien Sie respektvoll.…
Ich war unzufrieden mit meinem Aussehen und meinem Körper und war ständig selbstverurteilend und zweifelte an mir selbst, was zu einem geringen Selbstvertrauen und Selbstwertgefühl führte.	Es tut mir leid zu hören, dass Sie mit Ihrem Aussehen und Ihrem Körper unzufrieden waren. Es ist wichtig, sich daran zu erinnern, dass wir alle einzigartig sind und dass es keine "richtige" oder "falsche" Art gibt, auszusehen. Wir sollten uns alle so akzeptieren, wie wir sind, und uns nicht mit anderen vergleichen. Es ist auch wichtig, sich daran zu erinnern, dass unser Aussehen nicht unser Wert …
Ich fühle mich oft allein und hilflos, als würde mich niemand wirklich verstehen, und es fällt mir schwer, mit Menschen in Kontakt zu treten, was mich stört und es schwierig macht, eine Lösung zu finden	Es tut mir leid zu hören, dass Sie sich so fühlen. Es kann sehr schwierig sein, sich allein und unverstanden zu fühlen. Es ist wichtig, sich daran zu erinnern, dass Sie nicht allein sind und dass es Menschen gibt, die sich um Sie kümmern. Wenn Sie sich überfordert fühlen, ist es wichtig, mit jemandem zu sprechen, dem Sie vertrauen, wie z. B. einem Freund, einem Familienmitglied oder einem Therape…
Nach der Scheidung meiner Eltern lebe ich im Haus meiner Großmutter. Obwohl ich bei meiner Mutter lebe, habe ich immer das Gefühl, dass sie fremder ist als meine Großmutter, und ich weiß nicht, wie ich mit ihr kommunizieren soll.	Es ist verständlich, dass du dich nach der Scheidung deiner Eltern fremd fühlst und nicht weißt, wie du mit deiner Mutter kommunizieren sollst. Es ist wichtig, dass du versuchst, mit deiner Mutter zu sprechen und ihr zu sagen, wie du dich fühlst. Es kann auch hilfreich sein, mit einem Therapeuten oder einer anderen vertrauenswürdigen Person zu sprechen, um deine Gefühle zu verarbeiten.
Meine Misserfolge sind zahlreicher als meine Erfolge. Immer öfter tröste ich mich selbst mit der Vorstellung, dass harte Arbeit zwangsläufig belohnt wird. Doch die Realität enttäuscht oft.	Es ist verständlich, dass Sie sich enttäuscht fühlen, wenn Ihre harte Arbeit nicht immer belohnt wird. Es ist jedoch wichtig, sich daran zu erinnern, dass Erfolg nicht immer sofort eintritt und dass es oft viele Rückschläge auf dem Weg gibt. Wenn Sie sich auf Ihre Ziele konzentrieren und weiter hart arbeiten, werden Sie Ihre Erfolge sehen.
Ich habe starke Angst davor, dass etwas passieren könnte und kann mich nicht beruhigen	Versuchen Sie, sich auf die Dinge zu konzentrieren, die Sie kontrollieren können, und nicht auf die Dinge, die Sie nicht kontrollieren können. Konzentrieren Sie sich auf Ihre Atmung und versuchen Sie, sich zu entspannen. Wenn Sie sich immer noch ängstlich fühlen, sprechen Sie mit jemandem, dem Sie vertrauen, oder suchen Sie professionelle Hilfe.
Ich habe das Gefühl, dass ich in einem Zustand der Verwirrung war und nicht wusste, was ich will und was ich tun sollte, was mich sehr stört und manchmal bei mir negative Gefühle hervorruft.	Es ist verständlich, dass Sie sich in einem Zustand der Verwirrung befinden und nicht wissen, was Sie wollen und was Sie tun sollen. Dies kann sehr frustrierend und sogar beängstigend sein. Es ist wichtig, dass Sie sich Zeit nehmen, um Ihre Gedanken und Gefühle zu sortieren. Versuchen Sie, sich auf die Dinge zu konzentrieren, die Sie kontrollieren können, und lassen Sie die Dinge los, die Sie nic…
Fühle mich gelegentlich niedergeschlagen und es ist schwierig, aus negativen Emotionen herauszukommen. Wie kann ich meine Mentalität anpassen?	Es gibt viele Dinge, die Sie tun können, um Ihre Mentalität anzupassen und sich weniger niedergeschlagen zu fühlen. Hier sind ein paar Tipps: * Konzentrieren Sie sich auf die Dinge, für die Sie dankbar sind. Nehmen Sie sich jeden Tag ein paar Minuten Zeit, um über die Dinge nachzudenken, für die Sie dankbar sind. Das kann alles sein, von Ihrer Gesundheit bis zu Ihrer Familie und Ihren Freunden. *…
Ich habe immer das Gefühl, dass ich nicht gut genug, nicht klug genug, nicht schön genug bin, und ich möchte mich oft perfekt verpacken, um zu verhindern, dass andere meine Mängel sehen	Es ist wichtig, sich daran zu erinnern, dass niemand perfekt ist und dass wir alle Fehler haben. Es ist auch wichtig, sich selbst zu akzeptieren und zu lieben, mit all unseren Fehlern und Unvollkommenheiten. Wenn wir uns ständig mit anderen vergleichen, werden wir immer das Gefühl haben, dass wir nicht gut genug sind. Es ist besser, sich auf die eigenen Stärken und positiven Eigenschaften zu konz…
Oft fühle ich mich innerlich leer, es fehlt mir das Gefühl der Zugehörigkeit und des Sinns	Es ist nicht ungewöhnlich, sich manchmal innerlich leer zu fühlen. Viele Menschen haben das Gefühl, dass sie nicht dazugehören oder dass ihr Leben keinen Sinn hat. Es gibt jedoch Dinge, die Sie tun können, um sich besser zu fühlen. Zunächst sollten Sie versuchen, herauszufinden, warum Sie sich leer fühlen. Gibt es etwas Bestimmtes, das Sie belastet? Haben Sie das Gefühl, dass Sie nicht gut genug …
Immer wenn jemand mit mir spricht oder mich lobt, habe ich das Gefühl, dass sie mich nur täuschen wollen, weil ich es nicht wert bin, respektiert zu werden.	Es ist verständlich, dass Sie sich so fühlen, wenn jemand mit Ihnen spricht oder Sie lobt. Es kann schwierig sein, Komplimente anzunehmen, wenn Sie sich selbst nicht wertschätzen. Es ist jedoch wichtig, sich daran zu erinnern, dass die Menschen Sie wahrscheinlich nicht täuschen wollen. Sie mögen Sie vielleicht wirklich und wollen Ihnen ein gutes Gefühl geben. Es gibt ein paar Dinge, die Sie tun k…
Ich habe Angst, dass ich von anderen kritisiert und abgelehnt werde, was zu einem immer geringeren Selbstvertrauen führen wird. Wie kann ich mein Selbstvertrauen verbessern?	Es gibt viele Dinge, die Sie tun können, um Ihr Selbstvertrauen zu verbessern. Hier sind einige Tipps: * Konzentrieren Sie sich auf Ihre Stärken. Jeder hat Stärken und Schwächen. Konzentrieren Sie sich auf Ihre Stärken und nutzen Sie sie zu Ihrem Vorteil. * Setzen Sie sich realistische Ziele. Wenn Sie sich unrealistische Ziele setzen, werden Sie wahrscheinlich scheitern, was Ihr Selbstvertrauen b…
Ich weiß nicht, wie ich mit meinen Emotionen umgehen soll. Ich explodiere oft wegen Kleinigkeiten. Ich habe das Gefühl, dass ich meine Emotionen nicht kontrollieren kann. Bedeutet das, dass ich ein psychisches Problem habe?	Es ist nicht ungewöhnlich, dass Menschen Schwierigkeiten haben, mit ihren Emotionen umzugehen. Es gibt viele Gründe, warum dies passieren kann, und es ist nicht unbedingt ein Zeichen für ein psychisches Problem. Allerdings kann es hilfreich sein, mit einem Therapeuten oder einer anderen medizinischen Fachkraft zu sprechen, wenn Sie sich Sorgen über Ihre Emotionen machen oder wenn diese Ihr Leben …
Ich bin voller Angst und Unsicherheit über die Zukunft, ich weiß nicht, welchen Weg ich gehen soll, ich fühle mich jeden Tag sehr verloren	Ich kann verstehen, dass Sie sich voller Angst und Unsicherheit über die Zukunft fühlen. Es ist nicht immer einfach, zu wissen, welchen Weg man gehen soll, und es ist normal, sich manchmal verloren zu fühlen. Aber ich möchte Ihnen sagen, dass Sie nicht allein sind. Viele Menschen fühlen sich genauso wie Sie. Und es gibt Hilfe. Es gibt viele Ressourcen, die Ihnen helfen können, Ihren Weg zu finden…
Ich leide schon seit jeher unter einer Zwangsstörung. Ich muss oft immer wieder kontrollieren, ob Türen und Fenster geschlossen sind, ob Elektrogeräte ausgeschaltet sind usw. Wenn diese Anforderungen nicht erfüllt werden können, fühle ich mich sehr verunsichert und verängstigt . Wie man dieses Problem beseitigt.	Es gibt verschiedene Möglichkeiten, Zwangsstörungen zu behandeln. Eine Möglichkeit ist die kognitive Verhaltenstherapie (KVT). Die KVT hilft Ihnen, Ihre Gedanken und Verhaltensweisen zu ändern, die zu Ihren Zwängen beitragen. Eine andere Möglichkeit ist die medikamentöse Behandlung. Medikamente können helfen, Ihre Symptome zu lindern und Ihnen zu ermöglichen, besser mit Ihren Zwängen umzugehen. W…
Manchmal fühle ich mich gelangweilt, ich weiß nicht, was ich tun soll, und ich weiß nicht, was die Zukunft für mich bereithält, und ich fühle mich leer.	Es ist normal, sich manchmal gelangweilt zu fühlen. Es ist ein Zeichen dafür, dass du nach neuen Herausforderungen suchst. Versuche, neue Dinge auszuprobieren, um deine Langeweile zu überwinden. Du könntest ein neues Hobby ausprobieren, dich mit Freunden treffen oder eine Reise unternehmen. Wenn du dich leer fühlst, versuche, dich auf deine Ziele zu konzentrieren. Was möchtest du erreichen? Was m…
Ich wollte schon immer ein Baby haben, aber als ich schwanger war, hatte ich immer das Gefühl, dass ich nicht in der Lage wäre, eine gute Mutter zu sein	Ich verstehe, dass Sie sich Sorgen machen, nicht in der Lage zu sein, eine gute Mutter zu sein. Das ist ein häufiges Gefühl, das viele Frauen haben, wenn sie zum ersten Mal schwanger sind. Es ist wichtig, sich daran zu erinnern, dass Sie nicht allein sind und dass es viele Ressourcen gibt, die Ihnen helfen können, eine gute Mutter zu werden. Hier sind einige Tipps, die Ihnen helfen können, sich a…
Ich machte mir immer Sorgen um meinen Körper und meine Gesundheit und befürchtete, dass ich verschiedene Krankheiten bekommen könnte, was mich sehr nervös und ängstlich machte.	Es ist verständlich, dass Sie sich Sorgen um Ihren Körper und Ihre Gesundheit machen. Es ist wichtig, sich um sich selbst zu kümmern und auf seine Gesundheit zu achten. Allerdings sollten Sie sich nicht zu viele Sorgen machen, denn das kann zu unnötigem Stress und Ängsten führen. Versuchen Sie, sich zu entspannen und sich auf die positiven Dinge in Ihrem Leben zu konzentrieren. Wenn Sie sich Sorg…
Ich bin sehr selbstbewusst und wählerisch, was mein Aussehen und meine Figur angeht, und bin oft in einer Art endloser Selbstkorrektur und Veränderung gefangen	Es ist wichtig, sich daran zu erinnern, dass es keine "perfekte" Körperform oder Aussehen gibt. Jeder ist anders und das ist es, was uns schön macht. Es ist wichtig, sich selbst zu akzeptieren und zu lieben, egal wie man aussieht. Wenn Sie sich Sorgen um Ihr Aussehen machen, sprechen Sie mit einem Freund, einem Familienmitglied oder einem Therapeuten. Sie können Ihnen helfen, sich selbst zu akzep…
Lernbehinderungen kommen häufig vor und Sie können das Lernen unterhaltsamer gestalten, indem Sie es wie ein Spiel behandeln	Lernbehinderungen sind ein häufiges Problem, das viele Menschen betrifft. Es gibt jedoch viele Möglichkeiten, das Lernen unterhaltsamer zu gestalten und es so zu einem Spiel zu machen. Eine Möglichkeit ist, das Lernen mit Spielen zu verbinden. Es gibt viele verschiedene Lernspiele, die man online oder in Geschäften finden kann. Diese Spiele können helfen, das Lernen zu unterhaltsamer zu gestalten…
Natürlich möchte ich jemanden haben, auf den ich mich verlassen kann, aber ich weiß nicht, wie ich das angehen soll. Jedes Mal, wenn ich es versuche, scheitere ich, und dann verliere ich den Mut und kehre zum ursprünglichen Punkt zurück.	Es ist verständlich, dass Sie sich Sorgen machen, wenn Sie versuchen, jemanden zu finden, auf den Sie sich verlassen können. Es kann schwierig sein, zu wissen, wo man anfangen soll, und es kann noch schwieriger sein, die Hoffnung nicht zu verlieren, wenn man immer wieder scheitert. Aber es ist wichtig, sich daran zu erinnern, dass es da draußen Menschen gibt, die Sie unterstützen und auf die Sie …
Ich stelle fest, dass mein Interesse und meine Begeisterung für Dinge immer geringer werden und ich mich immer weniger motiviert fühle, irgendetwas zu tun. Ist das ein psychisches Problem?	Es ist möglich, dass Sie ein psychisches Problem haben, wenn Sie feststellen, dass Ihr Interesse und Ihre Begeisterung für Dinge immer geringer werden und Sie sich immer weniger motiviert fühlen, irgendetwas zu tun. Es gibt viele verschiedene psychische Probleme, die diese Symptome verursachen können, z. B. Depressionen, Angstzustände oder Burnout. Wenn Sie sich Sorgen machen, dass Sie ein psychi…
Regelmäßiger psychischer Druck beeinträchtigt unsere emotionale Stabilität und kann sich auf unsere körperliche Gesundheit auswirken. Wir sollten gute Arbeit bei der Förderung der psychischen Qualität leisten und eine Aufklärung über psychische Gesundheit durchführen	Regelmäßiger psychischer Druck kann unsere emotionale Stabilität beeinträchtigen und sich auf unsere körperliche Gesundheit auswirken. Wir sollten gute Arbeit bei der Förderung der psychischen Qualität leisten und eine Aufklärung über psychische Gesundheit durchführen. Psychische Gesundheit ist ein wichtiges Thema, das oft nicht genug Aufmerksamkeit bekommt. Es ist wichtig, dass wir uns um unsere…
Ich wurde eine Nacht lang widerrechtlich eingesperrt, bis zur Schwäche gefoltert, weinte allein in einer Ecke, nur Tränen erhellten die Dunkelheit	Es tut mir leid, dass Ihnen das passiert ist. Ich kann mir nicht vorstellen, wie schwer das für Sie gewesen sein muss. Wenn Sie möchten, können Sie mir mehr darüber erzählen. Ich bin hier, um Ihnen zuzuhören.
Im Hinblick auf die psychische Gesundheit von Jugendlichen ist es sehr wichtig zu lernen, wie man eine gesunde Beziehung aufbaut und wie man seine Gefühle und Ansprüche richtig ausdrückt	Jugendliche stehen vor einer Reihe von Herausforderungen, wenn es um die psychische Gesundheit geht. Eine der wichtigsten Herausforderungen ist das Erlernen gesunder Beziehungen. Jugendliche müssen lernen, wie man mit anderen kommuniziert, wie man Konflikte löst und wie man mit schwierigen Gefühlen umgeht. Eine weitere wichtige Herausforderung ist das Erlernen, wie man seine Gefühle und Bedürfnis…
Ich habe in letzter Zeit häufig Albträume, und diese Träume machen mir Angst und Unbehagen und beeinträchtigen sogar meine Schlafqualität und mein tägliches Leben.	Albträume können sehr belastend sein und Ihre Schlafqualität und Ihr tägliches Leben beeinträchtigen. Es gibt jedoch einige Dinge, die Sie tun können, um Albträume zu reduzieren oder zu verhindern. 1. **Achten Sie auf Ihre Schlafhygiene.** Eine gute Schlafhygiene kann dazu beitragen, dass Sie besser schlafen und Albträume reduzieren. Dazu gehören regelmäßige Schlafzeiten, eine entspannende Schlaf…
Ich bin immer ängstlich und sorge mich ständig darüber, wie die Dinge laufen, vor allem kleine Dinge können auch dazu führen, dass ich mich unwohl und unwohl fühle	Es ist verständlich, dass Sie sich Sorgen machen, wie die Dinge laufen, vor allem, wenn es um kleine Dinge geht. Es ist wichtig, sich daran zu erinnern, dass jeder Fehler macht und dass es in Ordnung ist, nicht perfekt zu sein. Versuchen Sie, sich auf die Dinge zu konzentrieren, die Sie gut machen, und nicht auf die Dinge, die Sie nicht so gut machen. Es kann auch hilfreich sein, mit jemandem zu …
Ich kann meine negativen Gedanken nicht unterdrücken, manchmal denke ich immer noch an das Schlimmste, selbst wenn die Dinge nicht so schlimm sind. Ich fühle mich so deprimiert und hilflos, ich habe das Gefühl, dass ich dieses Gefühl niemals loswerden kann.	Es ist verständlich, dass Sie sich deprimiert und hilflos fühlen, wenn Sie mit negativen Gedanken zu kämpfen haben. Es kann schwierig sein, diese Gedanken zu kontrollieren, aber es gibt Dinge, die Sie tun können, um sie zu bewältigen. Eine Möglichkeit, mit negativen Gedanken umzugehen, ist, sie zu hinterfragen. Wenn Sie einen negativen Gedanken haben, fragen Sie sich, ob er wirklich wahr ist. Ist…
Ich habe das Gefühl, dass mein Leben langweilig ist und es mir an Leidenschaft und Motivation mangelt, wodurch ich mich deprimiert und verloren fühle	Es gibt viele Dinge, die Sie tun können, um Ihr Leben interessanter zu gestalten und Ihre Leidenschaft und Motivation wiederzufinden. Hier sind ein paar Tipps: * **Setzen Sie sich Ziele.** Was möchten Sie in Ihrem Leben erreichen? Was sind Ihre Träume? Wenn Sie wissen, was Sie wollen, können Sie einen Plan erstellen, um es zu erreichen. * **Ergreifen Sie Maßnahmen.** Träumen Sie nicht nur von ein…
Ich leide häufig unter Schlaflosigkeit. Nachts liege ich im Bett und denke an Arbeit, familiäre Angelegenheiten und zwischenmenschliche Beziehungen, wodurch ich tagsüber nicht fokussiert bin und meine Arbeitsleistung beeinträchtigt ist. Meine Stimmung ist ebenfalls sehr schlecht.	Es gibt ein paar Dinge, die Sie tun können, um Ihre Schlaflosigkeit zu lindern. * **Gehen Sie regelmäßig zur gleichen Zeit ins Bett und stehen Sie zur gleichen Zeit auf.** Dies wird dazu beitragen, Ihren natürlichen Schlaf-Wach-Rhythmus zu regulieren. * **Schaffen Sie eine entspannende Schlafumgebung.** Ihr Schlafzimmer sollte dunkel, ruhig und kühl sein. Vermeiden Sie es, vor dem Schlafengehen f…
Wenn ich Rückschläge und Enttäuschungen erlebe, denke ich, dass der einzige Weg, auf Nummer sicher zu gehen, darin besteht, alles zu vergessen.	Es ist nicht immer möglich, Rückschläge und Enttäuschungen zu vermeiden. Aber es ist wichtig, wie wir mit ihnen umgehen. Wenn wir uns von Rückschlägen und Enttäuschungen definieren lassen, dann werden wir nie in der Lage sein, unser volles Potenzial zu entfalten. Stattdessen sollten wir uns auf die Dinge konzentrieren, die wir aus unseren Fehlern lernen können, und uns nicht von ihnen zurückhalte…
Ich fühle mich oft müde und kraftlos, auch wenn ich keine körperliche Arbeit geleistet habe. Ich habe auch häufig Schlafstörungen und kann nicht einschlafen, was mich sehr unwohl und belastet fühlen lässt.	Es gibt viele mögliche Gründe, warum Sie sich müde und kraftlos fühlen könnten, auch wenn Sie keine körperliche Arbeit geleistet haben. Einige der häufigsten Gründe sind: * **Schlafmangel:** Wenn Sie nicht genug Schlaf bekommen, kann das zu Müdigkeit und Erschöpfung führen. * **Stress:** Stress kann sowohl körperliche als auch geistige Erschöpfung verursachen. * **Ernährung:** Eine schlechte Ernä…
Ich leide manchmal unter Depressionen, kann nicht normal essen und kontrolliere dann mein Essen, weil ich Angst habe, dass die Leute sehen, dass ich dünner werde	Es tut mir leid zu hören, dass Sie unter Depressionen leiden. Depressionen können eine schwere Krankheit sein, aber es gibt Hilfe. Es gibt viele verschiedene Behandlungsmöglichkeiten für Depressionen, einschließlich Medikamente, Psychotherapie und Selbsthilfegruppen. Wenn Sie sich Sorgen um Ihr Essverhalten machen, sollten Sie mit Ihrem Arzt sprechen. Ihr Arzt kann Ihnen helfen, einen Behandlungs…
Meine Eltern kritisieren mich ständig und egal, was ich tue, ist nicht gut genug, es macht mich sehr deprimiert und enttäuscht, ich habe das Gefühl, dass ich nie in der Lage sein werde, ihre Zustimmung und ihr Lob zu bekommen	Es tut mir leid zu hören, dass Sie sich so fühlen. Es kann sehr schwierig sein, mit Kritik von den Eltern umzugehen, vor allem, wenn es sich um ständige Kritik handelt. Es ist wichtig, sich daran zu erinnern, dass Sie nicht allein sind und dass es viele Menschen gibt, die ähnliche Erfahrungen gemacht haben. Es gibt ein paar Dinge, die Sie tun können, um mit der Kritik Ihrer Eltern umzugehen. Erst…
Meine Beziehung war schon immer sehr instabil, ich werde immer von Emotionen kontrolliert und bin nicht in der Lage, meine Beziehung auf gesunde Weise aufrechtzuerhalten	Es ist verständlich, dass Sie sich in Ihrer Beziehung instabil fühlen und von Ihren Emotionen kontrolliert werden. Es kann schwierig sein, eine Beziehung auf gesunde Weise aufrechtzuerhalten, wenn man sich nicht wohlfühlt. Es gibt jedoch einige Dinge, die Sie tun können, um Ihre Beziehung zu verbessern. Erstens sollten Sie versuchen, Ihre Emotionen zu verstehen und zu kontrollieren. Dies kann sch…
Xiaoling wurde im College gemobbt, wodurch sie minderwertig und depressiv wurde. Wie kann ich ihr helfen, ihr Selbstvertrauen und ihre geistige Gesundheit wiederzugewinnen?	Es gibt viele Möglichkeiten, Xiaoling zu helfen, ihr Selbstvertrauen und ihre geistige Gesundheit wiederzugewinnen. Hier sind einige Tipps: * Sei ein guter Zuhörer. Lass Xiaoling über ihre Erfahrungen sprechen und höre ihr aufmerksam zu. Sei nicht wertend und versuche nicht, ihre Gefühle zu ändern. * Sei unterstützend. Lass Xiaoling wissen, dass du für sie da bist und dass du sie unterstützt. * H…
Meine familiären Beziehungen waren kompliziert und ich war oft gestresst und unsicher und wusste nicht, wie ich damit umgehen sollte oder an wen ich mich um Hilfe wenden sollte.	Es ist verständlich, dass Sie sich in dieser Situation gestresst und unsicher fühlen. Es kann sehr schwierig sein, mit komplizierten familiären Beziehungen umzugehen, und es ist wichtig, dass Sie sich Unterstützung suchen. Es gibt viele Möglichkeiten, Hilfe zu bekommen, und ich kann Ihnen gerne dabei helfen, die richtige Option für Sie zu finden.
Ich habe einen Freund, der sich immer negativ beschwert und zu nichts eine positive Einstellung hat. Ich glaube, seine Negativität beeinflusst meine Gefühle, aber ich weiß nicht, wie ich mit ihm kommunizieren soll	Es ist wichtig, dass du deine eigenen Grenzen setzt und dich nicht von der Negativität deines Freundes beeinflussen lässt. Du kannst ihm sagen, dass du seine negativen Äußerungen nicht hören möchtest und dass du es lieber hättest, wenn er sich positiver ausdrücken würde. Wenn er sich nicht ändern möchte, musst du vielleicht die Zeit, die du mit ihm verbringst, einschränken oder sogar ganz beenden…
In letzter Zeit habe ich festgestellt, dass ich immer wieder unter Schlaflosigkeit leide. Selbst wenn ich einschlafe, habe ich Albträume und fühle mich nach dem Aufwachen sehr belastet. Was kann ich tun?	Es gibt verschiedene Möglichkeiten, mit Schlaflosigkeit umzugehen. Hier sind einige Tipps: * Halten Sie sich an einen regelmäßigen Schlaf-Wach-Rhythmus und gehen Sie jeden Tag zur gleichen Zeit ins Bett und stehen Sie auf. * Schaffen Sie eine entspannende Schlafumgebung. Ihr Schlafzimmer sollte dunkel, ruhig und kühl sein. * Vermeiden Sie Koffein und Alkohol vor dem Schlafengehen. * Treiben Sie r…
Wenn ich mit Freunden chatte, habe ich manchmal immer das Gefühl, dass das Gespräch beendet ist und es nichts zu sagen gibt	Es gibt ein paar Dinge, die du tun kannst, wenn du das Gefühl hast, dass ein Gespräch mit Freunden beendet ist und es nichts mehr zu sagen gibt. * **Wechsle das Thema.** Manchmal kann ein einfacher Themenwechsel das Gespräch wieder in Gang bringen. Versuche, etwas zu finden, das ihr alle gemeinsam habt, und sprich darüber. * **Stelle offene Fragen.** Offene Fragen erfordern mehr als eine Ja-oder-…
Mein Kind wird in der Schule gemobbt und ist jetzt sehr zurückgezogen und ich weiß nicht, wie ich ihm helfen kann	Es tut mir leid zu hören, dass Ihr Kind in der Schule gemobbt wird. Mobbing kann ein sehr traumatisches Erlebnis sein und es ist wichtig, dass Sie Ihr Kind unterstützen. Hier sind einige Tipps, wie Sie Ihrem Kind helfen können: * Sprechen Sie mit Ihrem Kind über das Mobbing. Lassen Sie es wissen, dass Sie für es da sind und dass Sie ihm helfen wollen. * Versichern Sie Ihrem Kind, dass es nicht al…
Wenn ich mit Menschen kommuniziere, bin ich immer sehr nervös. Ich weiß nicht, was ich sagen soll, und ich habe Angst, dass ich das Falsche sage.	Es ist verständlich, dass Sie sich nervös fühlen, wenn Sie mit Menschen kommunizieren. Viele Menschen fühlen sich so. Es gibt jedoch einige Dinge, die Sie tun können, um Ihre Nervosität zu verringern. Erstens, versuchen Sie, sich vor Augen zu halten, dass jeder nervös ist, wenn er mit neuen Menschen spricht. Das ist ganz normal. Zweitens, versuchen Sie, sich auf das Gespräch zu konzentrieren und …
Immer wenn ich allein bin, verspüre ich ein unerklärliches Angstgefühl, das unwissentlich von einer unsichtbaren Kraft kontrolliert wird. Ich habe das Gefühl, gefangen zu sein, gefangen in einer undurchdringlichen Hülle, manchmal wird mir alles furchtbar unheimlich	Es ist verständlich, dass Sie sich ängstlich fühlen, wenn Sie allein sind. Es kann beängstigend sein, sich verletzlich zu fühlen und nicht zu wissen, was als nächstes passieren wird. Es ist wichtig, sich daran zu erinnern, dass Sie nicht allein sind und dass es Menschen gibt, die Ihnen helfen können. Wenn Sie sich überfordert fühlen, sprechen Sie mit jemandem, dem Sie vertrauen, oder suchen Sie p…
Ich war immer zu hart zu mir selbst und hatte das Gefühl, nicht gut genug zu sein, um geliebt und geschätzt zu werden	Es ist wichtig, dass Sie sich selbst vergeben und sich selbst lieben, um zu heilen. Sie sind ein wertvoller Mensch, der es verdient, geliebt und geschätzt zu werden.
Mein Leben ist nur eine ständige Frustration, ich versage, egal was ich tue, ich fühle mich wertlos	Es tut mir leid zu hören, dass Sie sich so fühlen. Ich kann verstehen, dass Sie sich frustriert und wertlos fühlen, wenn Sie immer wieder versagen. Aber ich möchte Ihnen sagen, dass Sie nicht wertlos sind. Sie sind ein wertvoller Mensch, der es verdient, glücklich zu sein. Ich glaube, dass Sie das Potenzial haben, Ihre Ziele zu erreichen, wenn Sie sich nur anstrengen und nicht aufgeben. Ich möcht…
Ich wurde immer gemobbt, auf mich herabgeschaut, fühlte mich nutzlos, inkompetent, unfähig, in sozialen Situationen meine wahre Stärke und mein Können zu zeigen, und versteckte mich immer in der Ecke	Es tut mir leid zu hören, dass Sie gemobbt wurden und sich in sozialen Situationen nicht wohl fühlen. Mobbing ist ein ernstes Problem, das viele Menschen betrifft. Es kann sehr schwierig sein, mit Mobbing umzugehen, aber es gibt Hilfe. Wenn Sie sich gemobbt fühlen, sollten Sie mit jemandem sprechen, dem Sie vertrauen, wie z. B. einem Elternteil, Lehrer oder Freund. Sie können sich auch an eine An…
Ich fühle mich verwirrt und hilflos, was die Zukunft angeht, ich weiß nicht, was ich tun soll und ich weiß nicht, was ich will.	Es ist verständlich, dass du dich verwirrt und hilflos fühlst, wenn du nicht weißt, was du tun oder was du willst. Es kann hilfreich sein, sich auf die Dinge zu konzentrieren, die du kontrollieren kannst, und sich nicht zu sehr auf die Dinge zu konzentrieren, die du nicht kontrollieren kannst. Es kann auch hilfreich sein, mit jemandem zu sprechen, dem du vertraust, wie z. B. einem Freund, einem F…
Ich weiß nicht, warum ich immer zu viel nachdenke, mir Sorgen um die Zukunft mache und jedes Mal, wenn ich rausgehe, noch einmal kontrollieren muss, ob ich die Tür verschließe und die Fenster schließe, was mich sehr müde und gereizt macht	Es gibt ein paar Gründe, warum Sie sich Sorgen um die Zukunft machen könnten. Vielleicht haben Sie in der Vergangenheit negative Erfahrungen gemacht, die Sie dazu gebracht haben, sich Sorgen um die Zukunft zu machen. Oder vielleicht sind Sie einfach ein Mensch, der sich gerne Sorgen macht. Was auch immer der Grund sein mag, es gibt ein paar Dinge, die Sie tun können, um Ihre Sorgen zu reduzieren.…
Ich wurde schon lange sexuell missbraucht, fühle aber immer noch Schmerz und Kummer. Wie kann ich mit diesem vergangenen Schmerz umgehen?	Es ist verständlich, dass Sie nach einem sexuellen Missbrauch noch immer Schmerz und Kummer empfinden. Es ist wichtig, dass Sie sich Zeit nehmen, um zu heilen und zu verarbeiten, was Ihnen widerfahren ist. Es gibt viele Möglichkeiten, mit vergangenen Schmerzen umzugehen. Hier sind einige Tipps: * Sprechen Sie mit jemandem, dem Sie vertrauen. Dies kann ein Freund, ein Familienmitglied, ein Therape…
Ich hatte das Gefühl, dass mein Leben keinen Sinn und Zweck hatte, dass ich nicht finden konnte, was ich wirklich tun wollte, und dieses Gefühl des Verlorenseins war sehr schmerzhaft.	Es tut mir leid zu hören, dass Sie sich so fühlen. Ich kann verstehen, dass es sehr schmerzhaft sein kann, sich verloren und ohne Sinn und Zweck zu fühlen. Es ist wichtig, sich daran zu erinnern, dass Sie nicht allein sind und dass es viele Menschen gibt, die sich ähnlich fühlen. Es gibt auch viele Dinge, die Sie tun können, um sich besser zu fühlen. Sie können mit Freunden und Familie sprechen, …
Eines Tages fand ich einen Weg, meiner realen Welt zu entfliehen, indem ich meinen Kopf auf das Sofa legte, meine Ohren zusteckte und nicht auf die Außengeräusche hörte, so dass ich ganz in eine Welt eintauchen konnte, in der nur ich selbst war. In dieser Welt werden alle Probleme verschwinden.	Ich verstehe, dass Sie sich in einer schwierigen Situation befinden und nach einem Weg suchen, sich zu entspannen und zu entfliehen. Ich kann Ihnen gerne helfen, eine Lösung zu finden, die für Sie funktioniert.
Ich fühle mich oft allein und hilflos, habe das Gefühl, von niemandem verstanden oder unterstützt zu werden, selbst wenn Menschen um mich herum sind, ich fühle mich getrennt und entfremdet, diese Emotion macht mich sehr deprimiert und negativ und führt manchmal zu Angstzuständen und depressiven Symptomen	Es tut mir leid zu hören, dass Sie sich so fühlen. Es ist wichtig, sich daran zu erinnern, dass Sie nicht allein sind und dass es Menschen gibt, die sich um Sie kümmern und Sie unterstützen wollen. Es kann hilfreich sein, mit jemandem zu sprechen, dem Sie vertrauen, wie einem Freund, Familienmitglied oder Therapeuten. Sie können auch versuchen, sich auf Aktivitäten zu konzentrieren, die Ihnen Fre…
Ein Wort von dir kann mir das Herz brechen	Ich werde vorsichtig sein mit meinen Worten.
Ich bin äußerst unzufrieden mit meinem Aussehen und meiner Passform und habe oft ein geringes Selbstwertgefühl und Ängste	Es tut mir leid zu hören, dass Sie mit Ihrem Aussehen und Ihrer Passform unzufrieden sind. Ich kann verstehen, dass dies zu einem geringen Selbstwertgefühl und Ängsten führen kann. Es ist wichtig, sich daran zu erinnern, dass Sie nicht allein sind und dass es viele Menschen gibt, die sich mit ähnlichen Problemen auseinandersetzen. Es gibt viele Dinge, die Sie tun können, um Ihr Selbstwertgefühl z…
Ich weiß wirklich nicht, was ich tue. Ich habe immer keine Ahnung, was ich tun soll, und das macht mich frustriert.	Es ist in Ordnung, sich manchmal unsicher zu fühlen. Es ist ein Zeichen dafür, dass Sie sich weiterentwickeln und lernen. Hier sind ein paar Tipps, die Ihnen helfen können, mit Unsicherheit umzugehen: * Seien Sie sich Ihrer Stärken und Schwächen bewusst. Was können Sie gut, und was fällt Ihnen schwer? Wenn Sie wissen, was Sie gut können, können Sie sich auf diese Stärken konzentrieren und Ihre Sc…
Ich habe große soziale Ängste, ich traue mich nicht, mit Fremden zu kommunizieren und ich mag es nicht, an überfüllten Orten aufzutauchen. Ich hoffe, dass ich diese Ängste überwinden kann	Ich verstehe, dass Sie unter sozialen Ängsten leiden. Das kann sehr belastend sein. Es gibt jedoch viele Möglichkeiten, diese Ängste zu überwinden. Eine Möglichkeit ist, sich einer Selbsthilfegruppe oder einem Online-Forum anzuschließen, in dem sich Menschen mit ähnlichen Problemen austauschen. Eine andere Möglichkeit ist, eine Therapie zu machen. In der Therapie können Sie lernen, wie Sie mit Ih…
Psychologen glauben, dass extreme Depressionen die körperliche und geistige Gesundheit einer Person beeinträchtigen können	Psychologen glauben, dass extreme Depressionen die körperliche und geistige Gesundheit einer Person beeinträchtigen können. Depressionen können zu einer Reihe von körperlichen Problemen führen, darunter Gewichtsverlust oder -zunahme, Schlafstörungen, Müdigkeit, Schmerzen und Verdauungsprobleme. Depressionen können auch die geistige Gesundheit beeinträchtigen, was zu Problemen wie Konzentrationssc…
Immer wenn ich anfange, ein Ziel zu verfolgen, fühle ich mich machtlos, und wenn ich versuche, etwas zu ändern, habe ich das Gefühl, dass mir der Mut fehlt	Es ist verständlich, dass Sie sich machtlos fühlen, wenn Sie versuchen, ein Ziel zu verfolgen. Es kann schwierig sein, motiviert zu bleiben und sich nicht von Rückschlägen entmutigen zu lassen. Aber es gibt ein paar Dinge, die Sie tun können, um Ihre Chancen auf Erfolg zu erhöhen. Erstens, setzen Sie sich realistische Ziele. Wenn Sie sich zu viel vornehmen, werden Sie wahrscheinlich schnell frust…
Ich leide oft unter Schlaflosigkeit und Konzentrationsschwierigkeiten bei der Arbeit, weil ich mir Sorgen mache, dass ich die Arbeit, die ich mache, nicht schaffen werde	Es gibt ein paar Dinge, die Sie tun können, um Ihre Schlaflosigkeit und Konzentrationsschwierigkeiten zu lindern. * Sorgen Sie für eine gute Schlafhygiene. Das bedeutet, dass Sie einen regelmäßigen Schlafrhythmus einhalten, sich vor dem Schlafengehen entspannen und eine angenehme Schlafumgebung schaffen. * Vermeiden Sie Koffein und Alkohol vor dem Schlafengehen. Diese Substanzen können Ihren Schl…
Es schmerzt mich mehr denn je, wenn meine Familie meine Hilfe ablehnt	Es tut mir leid zu hören, dass Sie sich so fühlen. Es kann sehr schmerzhaft sein, wenn die eigene Familie die Hilfe ablehnt, die man ihnen anbietet. Es ist wichtig, sich daran zu erinnern, dass Sie nicht allein sind und dass es viele Menschen gibt, die sich in einer ähnlichen Situation befinden. Es gibt auch viele Ressourcen, die Ihnen helfen können, mit dieser Situation umzugehen. Wenn Sie möcht…
Ich fühle mich jedes Mal deprimiert, wenn ich auf Schwierigkeiten stoße	Es ist verständlich, dass Sie sich deprimiert fühlen, wenn Sie auf Schwierigkeiten stoßen. Schwierigkeiten sind ein natürlicher Teil des Lebens, und es ist wichtig, zu lernen, wie man mit ihnen umgeht. Es gibt viele Dinge, die Sie tun können, um mit Schwierigkeiten umzugehen, z. B. mit Freunden oder Familie sprechen, sich professionelle Hilfe suchen oder sich Zeit für sich selbst nehmen. Es ist w…
Ich fühle mich oft deprimiert und hilflos, habe das Gefühl, dass es meinem Leben an Sinn und Wert mangelt, und denke manchmal an Selbstmord, aber ich habe Angst, es irgendjemandem zu erzählen, weil ich befürchte, dass sie denken, ich sei ein schwacher Mensch und ein Versager.	Es ist wichtig, dass Sie mit jemandem über Ihre Gefühle sprechen, dem Sie vertrauen, z. B. mit einem Freund, einem Familienmitglied oder einem Therapeuten. Es gibt auch viele Selbsthilfegruppen und Online-Ressourcen, die Ihnen helfen können. Bitte denken Sie daran, dass Sie nicht allein sind und dass es Hilfe gibt.
Ich habe einen Freund, der immer das Gefühl hat, er sei nicht gut genug, nicht klug genug, nicht talentiert genug oder nicht einmal wert, dass er sich um ihn kümmert, was mir Sorgen um seine geistige Gesundheit macht.	Es ist wichtig, dass Sie mit Ihrem Freund über seine Gefühle sprechen und ihm versichern, dass Sie für ihn da sind. Sie können ihm auch vorschlagen, mit einem Therapeuten oder einer anderen Fachkraft für psychische Gesundheit zu sprechen, die ihm helfen kann, seine Gefühle zu verarbeiten und Strategien zu entwickeln, um mit ihnen umzugehen.
Ich leide oft unter dem Druck der Arbeit und den Familienkonflikten und fühle mich dadurch gedrückt und verzweifelt. Wie kann ich diese Emotionen lindern und meine psychologische Gesundheit aufrechterhalten?	Es gibt viele Möglichkeiten, mit Stress und Druck umzugehen. Hier sind ein paar Tipps: * **Sprechen Sie mit jemandem.** Es kann hilfreich sein, mit einem Freund, Familienmitglied, Therapeuten oder einer anderen Person zu sprechen, der Sie unterstützen kann. * **Nehmen Sie sich Zeit für sich selbst.** Achten Sie darauf, dass Sie sich jeden Tag etwas Zeit nehmen, um sich zu entspannen und zu genieß…
In letzter Zeit geraten meine Gedanken zunehmend durcheinander und ich mache mir Sorgen um meine geistige Gesundheit, und das macht mir Angst	Es ist verständlich, dass Sie sich Sorgen um Ihre geistige Gesundheit machen, wenn Ihre Gedanken in letzter Zeit zunehmend durcheinander geraten. Es ist wichtig, dass Sie sich Hilfe suchen, wenn Sie sich Sorgen um Ihre geistige Gesundheit machen. Es gibt viele Ressourcen, die Ihnen helfen können, Ihre geistige Gesundheit zu verbessern. Sie können mit Ihrem Arzt oder Therapeuten sprechen, oder Sie…
Ich traue mich nicht, anderen gegenüberzutreten, ich habe immer das Gefühl, dass ich nicht gut genug bin, ich bin nervös, selbst wenn meine Freunde mit mir reden, werde ich mir weiterhin Sorgen darüber machen, was sie denken	Es ist verständlich, dass Sie sich Sorgen darüber machen, was andere denken. Es ist jedoch wichtig, sich daran zu erinnern, dass Sie nicht für die Gedanken und Gefühle anderer verantwortlich sind. Sie können nur Ihre eigenen Gedanken und Gefühle kontrollieren. Konzentrieren Sie sich auf Ihre Stärken und darauf, was Sie gut können. Seien Sie stolz auf sich und Ihre Leistungen. Wenn Sie sich selbst…
Ich mache mir Sorgen, dass ich meine geistige Gesundheit nicht aufrechterhalten kann und meine Familie im Stich lasse	Ich verstehe, dass Sie sich Sorgen um Ihre geistige Gesundheit machen und dass Sie Ihre Familie nicht im Stich lassen wollen. Das ist eine sehr verständliche Sorge. Es ist wichtig, dass Sie sich um Ihre geistige Gesundheit kümmern, damit Sie für sich selbst und Ihre Familie da sein können. Es gibt viele Möglichkeiten, wie Sie Ihre geistige Gesundheit erhalten können. Sie können mit einem Therapeu…
Ich fühle mich oft allein und hilflos, selbst wenn ich von Menschen umgeben bin, habe ich das Gefühl, dass niemand meine innere Welt versteht	Es kann sehr schwierig sein, sich allein und hilflos zu fühlen, selbst wenn man von Menschen umgeben ist. Es ist wichtig, sich daran zu erinnern, dass man nicht allein ist und dass es Menschen gibt, die sich um einen kümmern. Es kann hilfreich sein, mit jemandem zu sprechen, dem man vertraut, wie z. B. einem Freund, einem Familienmitglied oder einem Therapeuten. Es kann auch hilfreich sein, sich …
Ich bin sehr verwirrt über die Zukunft, ich weiß nicht, was ich tun soll, diese Verwirrung macht mich sehr ängstlich und unruhig	Es ist verständlich, dass Sie sich über die Zukunft Sorgen machen. Die Welt ist ein unvorhersehbarer Ort, und es kann schwierig sein, zu wissen, was die Zukunft bringt. Aber es gibt ein paar Dinge, die Sie tun können, um Ihre Angst und Unruhe zu lindern. Erstens, versuchen Sie, sich auf die Gegenwart zu konzentrieren. Was können Sie heute tun, um Ihr Leben zu verbessern? Welche kleinen Schritte k…
Ich war heute auf einer Party, wurde aber von allen ausgelacht und von anderen abgelehnt. Ich war kurz vor dem Zusammenbruch	Es tut mir leid zu hören, dass Sie eine so schlechte Erfahrung gemacht haben. Es kann sehr schmerzhaft sein, von anderen abgelehnt zu werden, und es ist verständlich, dass Sie sich nach dem Zusammenbruch fühlen. Es ist wichtig, sich daran zu erinnern, dass Sie nicht allein sind. Jeder erlebt irgendwann in seinem Leben Ablehnung. Es ist auch wichtig, sich daran zu erinnern, dass Sie nicht weniger …
Ich finde meine Beziehungen schwierig und es ist immer schwierig, tiefe Verbindungen zu Menschen aufzubauen. Ich hatte das Gefühl, dass ich nicht wusste, wie ich mit Menschen auskommen oder kommunizieren sollte, sodass ich schnell isoliert war. Ich sehne mich danach, echte Freunde zu haben, weiß aber nicht, wie ich sie gewinnen kann.	Es ist nicht ungewöhnlich, dass Menschen Schwierigkeiten haben, tiefe Verbindungen zu anderen aufzubauen. Es kann viele Gründe dafür geben, von denen einige in Ihrer Kindheit wurzeln können. Wenn Sie das Gefühl haben, dass Sie nicht wissen, wie Sie mit Menschen auskommen oder kommunizieren sollen, kann dies zu Isolation und Einsamkeit führen. Es gibt jedoch Dinge, die Sie tun können, um Ihre Bezi…
Meine Arbeit steht unter großem Druck, ich muss jeden Tag Überstunden machen und bleibe oft lange auf. Ich habe das Gefühl, dass mein Körper und mein Geist an ihre Grenzen gestoßen sind, aber ich kann immer noch nicht aufhören. Was sollte ich tun, um das zu vermeiden? ein Zusammenbruch.	Es ist wichtig, dass Sie sich Zeit für sich selbst nehmen und sich von der Arbeit erholen. Versuchen Sie, jeden Tag etwas Zeit für sich selbst einzuplanen, um sich zu entspannen und zu genießen. Dies kann ein Spaziergang im Park sein, ein Bad nehmen oder ein Buch lesen. Es ist auch wichtig, dass Sie sich gesund ernähren und ausreichend schlafen. Wenn Sie sich überfordert fühlen, sprechen Sie mit …
Ich habe das Gefühl, dass ich meine Gefühle nicht kontrollieren kann und verliere oft wegen Kleinigkeiten die Beherrschung, was den Menschen um mich herum Unbehagen bereitet	Es ist verständlich, dass Sie sich Sorgen machen, wenn Sie das Gefühl haben, dass Sie Ihre Gefühle nicht kontrollieren können. Es ist wichtig, dass Sie sich darüber im Klaren sind, was Ihre Gefühle auslöst, und dass Sie versuchen, diese Auslöser zu vermeiden. Wenn Sie sich überfordert fühlen, ist es wichtig, dass Sie sich Hilfe suchen. Es gibt viele Möglichkeiten, mit Ihren Gefühlen umzugehen, un…
In meiner Familie gab es keine Liebe, keine warmen Worte, kein wirkliches Gefühl der Sicherheit, nur Vorwürfe und Druck auf mir, sodass ich introvertierter wurde und mit niemandem zu tun haben wollte.	Es tut mir leid zu hören, dass Sie in Ihrer Familie keine Liebe, keine warmen Worte und kein wirkliches Gefühl der Sicherheit erfahren haben. Das klingt sehr schmerzhaft. Es ist verständlich, dass Sie sich zurückgezogen haben und mit niemandem zu tun haben wollten. Ich möchte Ihnen sagen, dass Sie nicht allein sind. Viele Menschen haben ähnliche Erfahrungen gemacht. Es gibt Hilfe und Unterstützun…
Ich mache mir Sorgen um meine Zukunft, ich weiß nicht, ob ich erfolgreich sein werde, ob ich meine Träume verwirklichen kann	Es ist verständlich, dass Sie sich Sorgen um Ihre Zukunft machen. Viele Menschen tun das. Aber es gibt keinen Grund, warum Sie nicht erfolgreich sein sollten. Sie haben die Fähigkeiten und die Intelligenz, um alles zu erreichen, was Sie sich vornehmen. Konzentrieren Sie sich auf Ihre Stärken und nutzen Sie sie zu Ihrem Vorteil. Seien Sie nicht zu hart zu sich selbst und geben Sie nicht auf, wenn …
Ich hatte das Gefühl, dass ich den Stress und die Herausforderungen in meinem Leben nicht bewältigen konnte, und litt oft unter schlechter Stimmung, Angstzuständen und Schlaflosigkeit.	Es tut mir leid zu hören, dass Sie sich so fühlen. Es ist wichtig, dass Sie sich Hilfe suchen, wenn Sie sich überfordert fühlen. Es gibt viele Ressourcen, die Ihnen helfen können, mit Stress und Herausforderungen umzugehen. Ich kann Ihnen helfen, diese Ressourcen zu finden.
Ich fühle mich einsam und habe viele Menschen um mich herum, aber ich habe nicht immer das Gefühl, dass ich mich wirklich mit ihnen identifizieren kann. Ist das eine Beziehungsstörung?	Es ist nicht ungewöhnlich, sich einsam zu fühlen, auch wenn man von Menschen umgeben ist. Einsamkeit ist ein Gefühl der Isolation und des Mangels an Verbindung zu anderen. Es kann durch eine Reihe von Faktoren verursacht werden, darunter Beziehungsprobleme, soziale Isolation, Stress und Depressionen. Wenn Sie sich einsam fühlen, ist es wichtig, die Ursache Ihrer Gefühle zu verstehen. Wenn Sie gla…
Ich fühle mich sehr unwohl, was die Zukunft angeht, weiß nicht, was ich mit mir machen soll, und weiß nicht, was die Zukunft bringt	Es ist verständlich, dass Sie sich in Bezug auf die Zukunft unwohl fühlen. Die Welt ist ein unsicherer Ort, und es kann schwierig sein, zu wissen, was die Zukunft bringt. Aber es gibt Dinge, die Sie tun können, um sich besser zu fühlen. Erstens sollten Sie sich bewusst machen, dass Sie nicht allein sind. Viele Menschen fühlen sich in Bezug auf die Zukunft unsicher. Es ist ein normaler Teil des Le…
Ich habe viele Probleme in meiner Beziehung und fühle mich deprimiert und hilflos und weiß nicht, was ich tun soll	Es tut mir leid zu hören, dass Sie Probleme in Ihrer Beziehung haben. Ich kann verstehen, dass Sie sich deprimiert und hilflos fühlen. Es ist wichtig, dass Sie sich Unterstützung suchen, um diese schwierige Zeit zu überstehen. Es gibt viele Möglichkeiten, Hilfe zu bekommen. Sie können sich an einen Therapeuten wenden, mit Freunden oder Familie sprechen oder sich einer Selbsthilfegruppe anschließe…
Ich fühle mich oft sehr müde, körperlich und geistig schwach und habe manchmal sogar Selbstmordgedanken, da ich das Gefühl habe, mein Leben sei bedeutungslos	Es tut mir leid zu hören, dass Sie sich so fühlen. Ich kann verstehen, dass Sie sich hoffnungslos und verzweifelt fühlen, wenn Sie mit diesen Gedanken zu kämpfen haben. Es ist wichtig, dass Sie wissen, dass Sie nicht allein sind und dass es Hilfe gibt. Wenn Sie Selbstmordgedanken haben, ist es wichtig, dass Sie sich sofort Hilfe suchen. Sie können die Telefonseelsorge unter 0800-1110111 anrufen o…
Manchmal verspüre ich plötzlich extreme Angst und Panik, es fällt mir schwer, meine Emotionen und mein Verhalten zu kontrollieren, und dieser Zustand hält lange an.	Es tut mir leid zu hören, dass Sie sich so fühlen. Es ist wichtig, dass Sie sich Hilfe suchen, wenn Sie sich überfordert fühlen. Es gibt viele Ressourcen, die Ihnen helfen können, mit Ihren Emotionen und Ihrem Verhalten umzugehen. Ich kann Ihnen helfen, diese Ressourcen zu finden.
Immer wenn ich vor einer neuen Herausforderung stehe, fühle ich mich so nervös und unsicher, dass ich das Gefühl habe, nicht damit klarzukommen	Es ist ganz normal, sich vor neuen Herausforderungen nervös und unsicher zu fühlen. Das bedeutet, dass Sie sich der Herausforderung bewusst sind und dass Sie sich Sorgen machen, ob Sie ihr gewachsen sind. Das ist ein Zeichen dafür, dass Sie die Herausforderung ernst nehmen und dass Sie sich bemühen wollen, sie zu meistern. Es gibt ein paar Dinge, die Sie tun können, um mit Ihrer Nervosität und Un…
Manchmal habe ich plötzlich das Gefühl, keine Hobbys mehr zu haben, mich für nichts mehr zu interessieren und die Orientierung und Motivation verloren zu haben	Es ist nicht ungewöhnlich, sich manchmal so zu fühlen. Es kann eine Reihe von Gründen geben, warum Sie sich so fühlen, z. B. Stress, Müdigkeit oder Langeweile. Wenn Sie sich jedoch über einen längeren Zeitraum so fühlen, kann es hilfreich sein, mit einem Therapeuten oder Berater zu sprechen. Er kann Ihnen helfen, die Gründe für Ihre Gefühle zu verstehen und Strategien zu entwickeln, um sich besse…
Gelegentlich überkommt mich eine unkontrollierbare Emotion. Ich denke, was soll ich tun, wenn ich an einer Depression leide?	Depressionen sind eine ernstzunehmende psychische Erkrankung, die jeden treffen kann. Wenn Sie glauben, dass Sie an einer Depression leiden, ist es wichtig, dass Sie sich so schnell wie möglich Hilfe suchen. Es gibt viele verschiedene Möglichkeiten, Depressionen zu behandeln, und mit der richtigen Behandlung können Sie sich besser fühlen. Hier sind einige Dinge, die Sie tun können, wenn Sie glaub…
Ich hatte immer das Gefühl, dass mein Körper sich sehr unwohl fühlt und ich habe alle möglichen seltsamen Symptome, aber die Ärzte sagen, dass ich bei guter Gesundheit bin, was mich sehr ängstlich und hilflos macht.	Es tut mir leid zu hören, dass Sie sich unwohl fühlen und dass die Ärzte Ihnen nicht helfen können. Ich kann verstehen, dass Sie sich ängstlich und hilflos fühlen. Es gibt viele mögliche Gründe, warum Sie sich unwohl fühlen könnten, auch wenn die Ärzte sagen, dass Sie bei guter Gesundheit sind. Es könnte sein, dass Sie unter einer Krankheit leiden, die die Ärzte noch nicht diagnostiziert haben. E…
Aufgrund der langfristigen Anspannung leidet Huang Xiaoming häufig unter Schlaflosigkeit und verliert völlig das Gefühl für Tag und Nacht.	Aufgrund der langfristigen Anspannung leidet Huang Xiaoming häufig unter Schlaflosigkeit und verliert völlig das Gefühl für Tag und Nacht. Er schläft oft erst spät in der Nacht ein und wacht früh am Morgen auf. Manchmal schläft er sogar tagsüber ein. Er ist sehr müde und hat keine Energie.
Meine Beziehung zu meinen Freunden war schon immer nicht sehr gut, und ich finde es schwierig, echte Freunde zu finden. Das macht mich sehr einsam.	Es tut mir leid zu hören, dass Sie sich einsam fühlen. Es kann schwierig sein, echte Freunde zu finden, aber es ist nicht unmöglich. Hier sind ein paar Tipps, die Ihnen helfen könnten: * Seien Sie Sie selbst. Versuchen Sie nicht, jemand zu sein, der Sie nicht sind, nur um Freunde zu finden. Menschen werden sich eher zu Ihnen hingezogen fühlen, wenn sie Ihr wahres Ich kennenlernen. * Seien Sie off…
Die Leute um mich herum denken immer, dass ich zu nervös bin und mir über Kleinigkeiten Sorgen mache. Wie kann ich mich entspannen?	Es gibt viele Möglichkeiten, sich zu entspannen. Hier sind ein paar Tipps: * Atmen Sie tief durch. Wenn Sie sich gestresst fühlen, atmen Sie ein paar Mal tief durch. Dies wird Ihnen helfen, sich zu beruhigen und zu entspannen. * Machen Sie eine Pause. Wenn Sie sich überfordert fühlen, nehmen Sie sich ein paar Minuten Zeit, um sich zu entspannen. Gehen Sie spazieren, hören Sie Musik oder lesen Sie…
Meine Schlaflosigkeit zwingt mich, jeden Abend einen Psychiater aufzusuchen	Ich verstehe, dass Sie unter Schlaflosigkeit leiden und dass dies Sie sehr belastet. Es ist wichtig, dass Sie sich Hilfe suchen, um Ihre Schlaflosigkeit zu behandeln. Ein Psychiater kann Ihnen dabei helfen, die Ursachen Ihrer Schlaflosigkeit zu verstehen und Strategien zu entwickeln, um sie zu bewältigen.
Ich habe das Gefühl, dass ich dem Druck der Familie und der Gesellschaft nicht standhalten kann und dass ich viele Dinge nicht erreichen kann	Es ist verständlich, dass Sie sich unter Druck fühlen, den Erwartungen Ihrer Familie und der Gesellschaft zu entsprechen. Es kann schwierig sein, sich von diesen Erwartungen zu befreien und seinen eigenen Weg zu gehen. Aber es ist wichtig, sich daran zu erinnern, dass Sie Ihr eigenes Leben leben und Ihre eigenen Entscheidungen treffen müssen. Sie können nicht immer alle zufrieden stellen, und das…
Ich habe das Gefühl, dass sich meine Beziehungen verschlechtern, weder Familie noch Freunde vertrauen mir oder unterstützen mich mehr, ich fühle mich so verloren und hoffnungslos.	Es tut mir leid zu hören, dass Sie sich so fühlen. Es kann sehr schwierig sein, wenn sich Beziehungen verschlechtern und man sich verloren und hoffnungslos fühlt. Es ist wichtig, sich daran zu erinnern, dass Sie nicht allein sind und dass es Menschen gibt, die Ihnen helfen können. Wenn Sie möchten, können Sie sich gerne an eine Vertrauensperson wenden, um über Ihre Gefühle zu sprechen. Es kann au…
Ich fühle mich oft nicht in der Lage, meine Emotionen und mein Verhalten zu kontrollieren und verhalte mich oft impulsiv oder gewalttätig.	Es ist wichtig, dass Sie sich professionelle Hilfe suchen, wenn Sie sich nicht in der Lage fühlen, Ihre Emotionen und Ihr Verhalten zu kontrollieren. Ein Therapeut kann Ihnen helfen, die zugrunde liegenden Ursachen Ihres Verhaltens zu verstehen und Strategien zu entwickeln, um Ihre Emotionen und Ihr Verhalten besser zu kontrollieren.
Ich habe oft Angst davor, abgelehnt zu werden, deshalb sage ich selten meine Meinung	Es ist verständlich, dass Sie Angst davor haben, abgelehnt zu werden. Viele Menschen haben diese Angst. Es ist jedoch wichtig, sich bewusst zu machen, dass es nicht immer möglich ist, es allen recht zu machen. Wenn Sie immer nur Ihre Meinung sagen, um andere nicht zu verletzen, werden Sie sich selbst nicht treu bleiben. Es ist wichtig, dass Sie Ihre Meinung sagen, auch wenn Sie befürchten, dass s…
Im Teenageralter beginnt sich eine Depression langsam zu entwickeln	Im Teenageralter beginnt sich eine Depression langsam zu entwickeln. Die ersten Anzeichen sind oft Stimmungsschwankungen, Reizbarkeit und Rückzug. Die Betroffenen fühlen sich oft traurig und antriebslos. Sie haben keine Lust mehr auf Dinge, die ihnen früher Spaß gemacht haben. Auch Schlafstörungen und Appetitlosigkeit können auftreten. Wenn diese Symptome länger als zwei Wochen anhalten, sollte m…
Ich bin mit meinem Aussehen und meinem Körper unzufrieden, fühle mich nicht perfekt und fühle mich oft ängstlich und unsicher	Es ist wichtig, sich daran zu erinnern, dass niemand perfekt ist und dass jeder mit seinem Aussehen und seinem Körper unzufrieden ist. Es ist auch wichtig, sich daran zu erinnern, dass Angst und Unsicherheit normale Gefühle sind, die jeder von Zeit zu Zeit erlebt. Wenn Sie sich jedoch übermäßig ängstlich oder unsicher fühlen, kann es hilfreich sein, mit einem Therapeuten oder Berater zu sprechen.…
Ich habe immer Angst, dass das, was ich tue, nicht gut genug ist, auch wenn andere mich gelobt haben, kann ich meine Sorgen nicht loslassen	Es ist verständlich, dass Sie sich Sorgen machen, dass Ihre Arbeit nicht gut genug ist, auch wenn andere Sie gelobt haben. Es ist wichtig, sich daran zu erinnern, dass jeder Fehler macht und dass es keine perfekte Arbeit gibt. Konzentrieren Sie sich auf die positiven Aspekte Ihrer Arbeit und seien Sie stolz auf das, was Sie erreicht haben. Wenn Sie sich immer noch Sorgen machen, sprechen Sie mit …
Es fiel mir immer schwerer, mich zu konzentrieren, egal ob beim Lesen oder beim Erledigen von Dingen, ich ließ mich leicht ablenken	Es gibt viele Gründe, warum es Ihnen schwer fallen könnte, sich zu konzentrieren. Möglicherweise haben Sie zu viel Stress, sind müde oder haben ein gesundheitliches Problem. Es ist auch möglich, dass Sie an einer Aufmerksamkeitsdefizitstörung (ADS) oder einer Aufmerksamkeitsdefizit-Hyperaktivitätsstörung (ADHS) leiden. Wenn Sie sich Sorgen machen, dass Sie sich nicht konzentrieren können, sollten…
Ich habe immer das Gefühl, keinen Wert zu haben, ich weiß nicht, was der Sinn meiner Existenz ist, und ich fühle mich jeden Tag leer und hilflos.	Es tut mir leid zu hören, dass Sie sich so fühlen. Es ist wichtig, sich daran zu erinnern, dass Sie nicht allein sind und dass es Menschen gibt, die Ihnen helfen können. Wenn Sie sich hoffnungslos oder verzweifelt fühlen, ist es wichtig, mit jemandem zu sprechen, dem Sie vertrauen, oder sich professionelle Hilfe zu suchen. Es gibt viele Ressourcen verfügbar, um Ihnen zu helfen, sich besser zu füh…
Ich hatte Angst davor, mit Menschen zu interagieren, hatte Angst davor, abgelehnt, verspottet oder missverstanden zu werden, und ich fühlte mich oft allein und hilflos.	Ich verstehe, dass Sie Angst vor der Interaktion mit Menschen haben. Das ist eine häufige Angst, und es gibt viele Menschen, die sich genauso fühlen. Es ist wichtig, sich daran zu erinnern, dass Sie nicht allein sind und dass es Hilfe gibt. Es gibt viele Möglichkeiten, mit Ihrer Angst umzugehen, und ich kann Ihnen helfen, die richtige Strategie für Sie zu finden.
Ich war mit meinem Aussehen und meiner Figur sehr unzufrieden, fühlte mich hässlich und unattraktiv. Ich dachte oft darüber nach, mich einer Schönheitsoperation zu unterziehen und abzunehmen, machte mir aber auch Sorgen über die Risiken einer Operation und hatte Angst, von anderen lächerlich gemacht und abgelehnt zu werden.	Es ist verständlich, dass Sie sich mit Ihrem Aussehen und Ihrer Figur unzufrieden fühlen. Viele Menschen fühlen sich so, und es ist wichtig, sich daran zu erinnern, dass Sie nicht allein sind. Es gibt viele Möglichkeiten, Ihr Aussehen zu verbessern, ohne sich einer Schönheitsoperation zu unterziehen. Sie können versuchen, sich gesünder zu ernähren, mehr Sport zu treiben und sich besser zu kleiden…
Ich bleibe oft lange auf und mache beruflich Überstunden, wodurch sich meine körperliche Verfassung immer weiter verschlechtert, aber ich kann nicht damit aufhören, weil ich das Gefühl habe, dass ich nur auf diese Weise meinen Wert und meine Fähigkeiten unter Beweis stellen kann	Es ist wichtig, dass Sie sich um Ihre Gesundheit kümmern und sicherstellen, dass Sie genügend Schlaf bekommen. Wenn Sie sich Sorgen um Ihre körperliche Verfassung machen, sollten Sie mit einem Arzt sprechen. Es gibt viele Möglichkeiten, Ihren Wert und Ihre Fähigkeiten unter Beweis zu stellen, ohne Ihre Gesundheit zu gefährden.
Ich habe das Gefühl, dass ich immer süchtiger nach Spielen und sozialen Medien werde, als ob diese Dinge zu einem integralen Bestandteil meines Lebens geworden wären. Diese Abhängigkeit gibt mir das Gefühl, nicht in der Lage zu sein, mich daraus zu befreien und mich selbst zu verlieren. Ich hoffe, einen Weg zu finden, sie loszuwerden diese Abhängigkeit Methoden.	Es gibt ein paar Dinge, die Sie tun können, um Ihre Abhängigkeit von Spielen und sozialen Medien zu überwinden. Hier sind ein paar Tipps: * Legen Sie Grenzen fest, wie viel Zeit Sie mit Spielen und sozialen Medien verbringen. * Suchen Sie sich ein Hobby oder eine andere Aktivität, die Ihnen Spaß macht und die Sie von Spielen und sozialen Medien ablenkt. * Verbringen Sie mehr Zeit mit Freunden und…
Es störte mich, dass meine Stimmung immer auf und ab war, manchmal war ich sehr glücklich, und manchmal war ich so deprimiert, dass ich mich sogar umbringen wollte.	Es ist verständlich, dass Sie sich Sorgen um Ihre Stimmungsschwankungen machen. Es ist wichtig, dass Sie mit einem Arzt oder einer Ärztin über Ihre Symptome sprechen, um eine Diagnose zu erhalten und eine geeignete Behandlung zu finden.
Manchmal habe ich das Gefühl, dass niemand sich um mich kümmert und dass ich der einzige Mensch bin, auf den ich mich wirklich verlassen kann.	Es ist nicht ungewöhnlich, sich manchmal so zu fühlen. Es ist wichtig, sich daran zu erinnern, dass es Menschen gibt, die sich um dich kümmern, auch wenn es sich nicht immer so anfühlt. Freunde, Familie und sogar Fremde können dich unterstützen und dir helfen, dich weniger allein zu fühlen. Wenn du dich jedoch ständig einsam und isoliert fühlst, kann es hilfreich sein, mit einem Therapeuten oder …
In letzter Zeit leide ich oft unter Schlaflosigkeit und wälze mich nachts ständig im Bett hin und her. Könnte das ein zugrunde liegendes psychologisches Problem sein?	Es ist möglich, dass Ihre Schlaflosigkeit durch ein zugrunde liegendes psychologisches Problem verursacht wird. Schlafstörungen können ein Symptom für eine Reihe von psychischen Problemen sein, darunter Angstzustände, Depressionen und posttraumatische Belastungsstörungen. Wenn Sie glauben, dass Ihre Schlaflosigkeit durch ein psychologisches Problem verursacht werden könnte, sollten Sie mit Ihrem …
Mein Verhältnis zu meiner Familie war noch nie gut, ich habe das Gefühl, dass sie mich nicht verstehen, mich nicht respektieren, ich fühle mich dadurch einsam	Es tut mir leid zu hören, dass Sie sich in Ihrer Familie nicht wohlfühlen. Es ist wichtig, dass Sie sich in Ihrer Familie wohlfühlen und dass Sie sich von ihnen verstanden und respektiert fühlen. Wenn Sie sich nicht wohlfühlen, sollten Sie mit Ihrer Familie darüber sprechen. Sagen Sie ihnen, wie Sie sich fühlen und was Sie brauchen. Es ist wichtig, dass Sie sich in Ihrer Familie wohlfühlen und da…
Ich fühle mich oft innerlich leer und einsam und suche nach Dingen, um dieses Gefühl zu füllen, finde aber oft keine geeignete Möglichkeit, um diese Emotion zu lindern.	Es gibt viele Dinge, die Sie tun können, um sich weniger innerlich leer und einsam zu fühlen. Hier sind ein paar Tipps: * Verbringen Sie Zeit mit Menschen, die Sie lieben und die sich um Sie kümmern. * Machen Sie Dinge, die Ihnen Spaß machen und die Sie erfüllen. * Setzen Sie sich Ziele und arbeiten Sie daran, sie zu erreichen. * Helfen Sie anderen Menschen. * Seien Sie dankbar für das, was Sie h…
