# Supplementary material
Source: ML conference proceedings conference paper supplement (https://openreview.net/forum?id=JL42j1BL5h)
Supplement: supplementary_material [file Mental_Health_v.xlsx]

## Sheet: Sheet1
Input	Output
Ich fühle mich oft einsam und hilflos, niemand scheint mich zu verstehen. Ich fühle mich sogar wie ein Versager, ohne jeglichen Wert und Sinn. Dieses Gefühl macht mich sehr traurig und verzweifelt, ich weiß nicht, wie ich es loswerden kann.	Es ist wichtig zu verstehen, dass diese Gefühle normal sind und von vielen Menschen geteilt werden. Es ist auch wichtig, dass Sie diese Gefühle mit einem Vertrauten oder Therapeuten teilen, damit Sie professionelle Unterstützung erhalten können. Es kann hilfreich sein, sich aktiv daran zu erinnern, dass Sie nicht alleine sind. Es gibt andere Menschen, die Ihnen helfen und unterstützen können. Sie…
Selbst wenn ich nur eine Tüte Chips kaufe, mache ich mir Sorgen, dass die Leute denken, ich esse zu viel – ein selbstzerstörerisches Verhalten	Es verstehe ich, dass man sich Sorgen um das Image machen kann, wenn man bestimmte Dinge kauft oder isst. Tatsächlich kann das Selbstzerstörerische Verhalten zu einer negativen Einstellung gegenüber dem eigenen Körper und zur Angst sein, übergewichtig zu werden. Es ist jedoch wichtig zu beachten, dass jeder seine eigenen Vorlieben und Abneigungen hat und dass es kein einziger "richtiger" Weg gibt…
Ich fühlte mich ständig müde und machtlos, unfähig, mich auf meine Aufgaben zu konzentrieren oder überhaupt an den Dingen zu arbeiten, die mich interessierten, was mich sehr frustrierte.	Es ist verständlich, dass man sich von einer Schwäche und Frust empfinden kann, wenn man sich müde und unfähig fühlt, seine Aufgaben zu erledigen. Es gibt viele Gründe, warum man sich so fühlen könnte, und es ist wichtig, die Ursachen zu identifizieren und passende Maßnahmen zu ergreifen. Hier sind einige mögliche Gründe, warum man sich müde und unfähig fühlen könnte, und einige Vorschläge, wie m…
In letzter Zeit kann ich nicht gut schlafen oder habe Albträume, wenn ich einschlafe, und ich fühle mich sehr müde und müde, wenn ich aufwache.	Es ist verständlich, dass man sich müde und müde fühlen kann, wenn man Albträume hat und schlecht schläft. Hier sind einige mögliche Gründe, warum man sich so fühlen könnte und einige Vorschläge, wie man sich davon erholen kann:1. Schlafstörungen: Schlafstörungen können dazu führen, dass man Albträume hat und schlecht schläft. Versuche, Ihre Schlafstörungen zu verbessern, indem Sie Ihre Schlafumg…
Jedes Mal, wenn ich zum Arzt gehe, stellt sich keine Besserung ein, meine Stimmung verschlechtert sich und ich verfalle oft in Selbstmitleid und Selbstmitleid	Es ist wichtig, dass Sie Ihre Gefühle und Probleme bei Ihrem Arzt besprechen. Es ist möglich, dass eine andere Diagnose erforderlich ist oder dass eine andere Behandlung angemessen ist. Wenn Sie jedoch die gleiche Diagnose haben, wie die von Ihrem Arzt, können Sie auch eine andere Art von Behandlung oder Unterstützung in Erwägung ziehen. Es kann hilfreich sein, sich mit Ihren Gedanken anzunehmen …
Ich habe immer das Gefühl, isoliert und ausgeschlossen zu sein, selbst wenn ich unter Menschen bin, fühle ich mich einsam.	Es ist verständlich, dass solch negative Gedanken und Gefühle überwältigen können. Es ist wichtig zu verstehen, dass diese Gefühle nicht unbedingt die Realität widerspiegeln und dass es andere Menschen geben kann, die sich ähnlich fühlen. Es kann hilfreich sein, sich mit Freunden oder Familie zu vernetzen und sich Zeit mit Freunden und Familie zu nehmen. Es kann auch hilfreich sein, sich in eine …
Lassen Sie sich von Spielen abhängig machen, sonst übt das Internet einen unsichtbaren psychologischen Druck aus	Es ist wichtig, eine gesunde Balance zwischen Freizeitaktivitäten und anderen Aspekten des Lebens zu finden. Es ist auch wichtig, die Zeit zu verwenden und sich um sich selbst und um die Menschen um sich herum zu kümmern. Es kann hilfreich sein, sich Zeit für Freizeitaktivitäten wie Sport, Musik, Lesen oder kreative Aktivitäten wie Malen oder Schreiben zu nehmen. Es kann auch hilfreich sein, sich…
In letzter Zeit war der Druck zu hoch. Jeden Tag empfinde ich große Angst, habe Schlafstörungen, Kopfschmerzen und beschleunigten Herzschlag. Es fühlt sich so an, als ob ich jederzeit zusammenbrechen könnte.	Es ist verständlich, dass solch negative Gedanken und Gefühle überwältigen können. Es ist wichtig zu verstehen, dass solche Symptome nicht unbedingt die Realität widerspiegeln und dass es andere Menschen geben kann, die ähnliche Symptome haben. Es kann hilfreich sein, sich mit einem Arzt zu konfrontieren und sich eine ärztliche Untersuchung durchzuführen, um mögliche Ursachen für die Symptome zu …
Jedes Mal, wenn ich auf Schwierigkeiten und Rückschläge stoße, verliere ich immer das Selbstvertrauen und die Motivation und habe das Gefühl, dass ich damit nicht umgehen kann	Das ist ein alltäglicher Erfahrungsbericht vieler Menschen. Rückschläge und Schwierigkeiten sind ein natürlicher Bestandteil des Lernprozesses und können unsere Selbstvertrauen und Motivation beeinträchtigen. Die Frage ist, wie wir damit umgehen und unsere Motivation und Selbstvertrauen wiederherstellen können.Eine Möglichkeit ist, sich auf positive Erfahrungen in der Vergangenheit zu besinnen un…
Ich mache mir immer Sorgen, dass das, was ich tue, nicht gut genug ist, und ich habe das Gefühl, ständig von anderen Menschen beurteilt zu werden, und das ist deprimierend.	Das klingt sehr frustrierend und deprimierend. Es ist normal, dass wir uns Sorgen machen, ob unsere Aktionen gut genug sind oder ob wir von anderen beurteilt werden. Aber es ist wichtig, sich bewusst zu machen, dass wir unsere eigenen Erfahrungen und Erfolge haben und dass wir uns nicht von den Meinungen anderer beeinflussen müssen, die uns nichts angehen.Es kann hilfreich sein, sich auf die eige…
Ich machte mir immer Sorgen, ob ich alles richtig mache, hatte Angst davor, was andere über mich denken oder kritisieren würden, und geriet dadurch oft in schmerzhafte Selbstzweifel.	Das klingt sehr frustrierend und deprimierend. Es ist normal, dass wir uns Sorgen machen, ob wir alles richtig machen oder ob wir von anderen beurteilt werden. Aber es ist wichtig, sich bewusst zu machen, dass wir unsere eigenen Erfahrungen und Erfolge haben und dass wir uns nicht von den Meinungen anderer beeinflussen müssen, die uns nichts angehen.Es kann hilfreich sein, sich auf die eigene Per…
Ich behalte meine Gedanken in meinem Herzen, ich habe immer das Gefühl, dass ich explodiere, und ich kann mich nicht vor den Augen anderer verstecken	Es ist verständlich, dass Sie sich unsicher und unsicher fühlen, wenn Ihre Gedanken und Gefühle so stark sind. Es ist wichtig, dass Sie sich daran gewöhnen, diese Gedanken und Gefühle aufzuschreiben oder sich ihnen widmen, bevor Sie es tun. Eine Möglichkeit, dies zu erreichen, ist das Aufschreiben von Gedanken oder das Verfassen von Gedichten oder Geschichten. Es ist auch wichtig, dass Sie sich a…
Meine Familie erlebte einen plötzlichen Unfall, beide Eltern wurden schwer verletzt, wodurch ich mich hilflos und deprimiert fühlte und sogar depressive Symptome entwickelte.	Es tut mir leid zu hören, dass du und deine Familie in dieser schwierigen Situation versetzt wurdest. Plötzliche Unfälle können einen enormen Stress und Schock bescheren, und es ist normal, dass man sich so fühlt. Die Ängste und Traumatisationen, die aus solchen Ereignissen resultieren, können auch dazu führen, dass man sich depressiv fühlt. Es ist wichtig, dass du weißt, dass du diese Gefühle ve…
Ich finde heraus, dass ich immer weniger gerne mit Menschen interagiere. Ich ziehe es immer vor, alleine zu sein und habe kein Interesse daran, an sozialen Aktivitäten teilzunehmen oder mein Leben mit anderen zu teilen. Dieses Gefühl der Einsamkeit macht mich sehr deprimiert.	Es tut mir leid zu hören, dass du das Gefühl hast, immer weniger gerne mit Menschen zu interagieren und dass du dich oft allein fühlst. Einsamkeit kann ein sehr schweres Gefühl sein und kann dazu führen, dass man sich depressiv fühlt. Es ist wichtig, dass du weißt, dass du diese Gefühle verstehst und dass es helfen kann, sie zu bewältigen.Es gibt verschiedene Wege, um mit diesem Gefühl der Einsam…
Ich habe ein starkes Kontrollbedürfnis und möchte immer alles selbst kontrollieren und nicht zulassen, dass andere sich einmischen oder einmischen, was zum Zusammenbruch zwischenmenschlicher Beziehungen führt	Es tut mir leid zu hören, dass du das Gefühl hast, dass du alles selbst kontrollieren mußt und dass du nicht zulässt, dass andere dich beeinflussen oder einmischen. Ein starkes Kontrollbedürfnis kann manchmal dazu führen, dass man sich isoliert und sich von anderen entfernt, was zum Zusammenbruch von menschlichen Beziehungen führen kann. Es ist wichtig, dass du weißt, dass deine Gefühle versteckt…
Ich habe oft das Gefühl, dass mein Geist sehr chaotisch ist, als ob zu viele Gedanken und Stimmen gleichzeitig in meinem Kopf wären, wodurch ich mich sehr verwirrt und verloren fühle	Es ist verständlich, dass Sie sich verwirrt und verloren fühlen können, wenn Sie das Gefühl haben, dass Ihr Geist sehr chaotisch ist. Es ist wichtig, dass Sie sich daran gewöhnen, sich Zeit nehmen, um sich zu entspannen und sich auf sich selbst und Ihre Gedanken zu konzentrieren. Es kann hilfreich sein, sich mit einer Methode wie Achtsamkeit oder Meditation zu beschäftigen, um Ihre Gedanken und I…
Warum ich von meiner Familie für alles, was ich tue, kritisiert werde	Es gibt viele Gründe, warum Ihre Familie Sie kritisieren könnte, wenn Sie etwas tun. Vielleicht fühlen sie sich ungern verstanden oder ignoriert, wenn Sie Ihre Entscheidungen und Pläne teilen. Möglich ist auch, dass sie sich Sorgen um Ihr Wohlergehen machen und deshalb Bedenken haben, die Sie in Betracht ziehen. Es ist wichtig, offen und ehrlich mit Ihrer Familie zu reden und zu hören, was sie zu…
In letzter Zeit fühle ich mich jeden Tag erschöpft und energielos, auch nach längerem Schlaf wird es nicht besser	Es ist nicht ungewöhnlich, dass manchmal ein Mangel an Energie oder auch ein Mangel an Schlaf einschlägig ist. Es gibt jedoch auch andere mögliche Gründe, warum man sich jeden Tag erschöpft und energielos fühlt. Möglicherweise haben Sie zu wenig gesunde Nahrungsmittel zu sich genommen, zu viel getrunken oder Rauchen, oder Sie haben zu viel oder zu wenig geschlafen. Es ist wichtig, gesund zu leben…
Ich fühle mich, als hätte ich alle Motivation und Hoffnung verloren und fühle, dass das Leben sinnlos ist.	Es ist verständlich, dass manchmal ein Mangel an Motivation und Hoffnung einschlägig ist. Es gibt jedoch auch andere mögliche Gründe, warum Sie sich so fühlen. Möglicherweise haben Sie sich in einer schwierigen Situation oder Umgebung wiederfinden, die Ihre Hoffnungen und Ihr Wohlbefinden beeinträchtigt hat. Es ist auch möglich, dass Sie Unterstützung oder Hilfe benötigen, um Ihre Motivation und …
Ich bin manchmal sehr nervös und manchmal auch niedergeschlagen, aber ich weiß nicht, wie ich meine Stimmung ändern soll	Es ist normal, nervös zu sein oder niedergeschlagen zu fühlen, insbesondere in bestimmten Situationen. Es gibt jedoch auch andere Möglichkeiten, um Ihre Stimmung zu verbessern. Ein wichtiger Faktor ist es, gesunde Lebensweise zu pflegen, indem Sie möglicherweise mehr gesunde Nahrungsmittel zu sich nehmen, ausreichend schlafen und regelmäßig bewegen. Es kann auch hilfreich sein, sich Zeit für Selb…
Ich habe Probleme mit meinem Denken und meiner Wahrnehmung und höre oft seltsame Geräusche oder sehe seltsame Dinge, die mir große Angst machen	Es ist verständlich, dass Sie sich Sorgen machen und Hilfe suchen, wenn Sie Probleme mit Ihrem Denken und Ihrer Wahrnehmung haben und sich seltsame Geräusche und Dinge ansehen. Es gibt verschiedene Ursachen für solche Symptome, und es ist wichtig, dass Sie einen Arzt aufsuchen, um eine mögliche Erkrankung auszuschließen oder zu diagnostizieren.Einige Gründe für diese Symptome könnten sein:1. Scha…
Ich fühle mich oft angespannt und ängstlich, kann meine Emotionen und meinen Stress nicht kontrollieren, was mich sehr unruhig und unruhig macht.	Es ist verständlich, dass Sie sich ängstlich und unruhig fühlen, wenn Sie Schwierigkeiten haben, Ihre Emotionen und Stress zu kontrollieren. Es gibt verschiedene Möglichkeiten, um Ihre angespannten Zustände zu reduzieren und sich besser zu fühlen. Hier sind einige Tipps, die Ihnen helfen können:1. Entspannungsübungen: Entspannungsübungen wie Meditation, Yoga oder Atemübungen können helfen, Stress…
Ich fühle mich oft allein und hilflos und fühle mich leer, selbst wenn ich jemanden in meiner Nähe habe. Ich weiß nicht, warum das passiert. Wie kann ich um Hilfe bitten?	Es ist verständlich, dass Sie sich alleine und hilflos fühlen, wenn Sie das Gefühl haben, leer zu sein, selbst wenn Sie mit anderen Menschen zusammen sind. Es ist wichtig, dass Sie wissen, dass Sie nicht allein sind und dass es hilfreiche Ressourcen und Unterstützung für Sie gibt. Hier sind einige Schritte, die Ihnen helfen können, Hilfe zu finden und Ihre Gefühle zu verstehen:1. Sammeln Sie Info…
Ich war in der Vergangenheit traumatisiert und jetzt erinnere ich mich immer mit Angst und Schmerz an diese Erfahrung, und ich muss Hilfe suchen, um diese Emotion zu überwinden.	Es ist verständlich, dass Sie Hilfe suchen, um mit Ihren traumatischen Erinnerungen umzugehen. Es ist wichtig, dass Sie sich um Ihr Wohlbefinden kümmern und professionelle Hilfe suchen, um Ihnen dabei zu helfen, diese Erinnerungen zu verarbeiten und Ihre emotionalen Verletzungen zu heilen. Sie können Ihren Arzt oder eine Psychotherapeutin aufsuchen, um Unterstützung zu finden. Eine professionelle…
Ich kann die Erinnerungen an die Vergangenheit nicht loswerden und wenn ich an bestimmte Dinge denke, fühle ich mich sehr schmerzhaft und es beeinflusst sogar mein tägliches Leben	Es tut mir leid zu hören, dass du Schwierigkeiten mit deinen Erinnerungen und den damit verbundenen Emotionen hasst. Es ist verständlich, dass manchmal Gedanken oder Erinnerungen uns sehr schmerzlich berühren können und unser Leben beeinflussen können.Eine Möglichkeit, die negative Auswirkungen dieser Gedanken und Erinnerungen zu reduzieren, ist, darüber nachzudenken, wie und wo sie entstehen. Ma…
Ich wurde früher gemobbt und immer wenn ich daran denke, bekomme ich Angst, manchmal sogar Albträume.	Es tut mir leid zu hören, dass du in der Vergangenheit gemobbt wurdest und dass diese Erfahrung immer noch deine Gedanken und Emotionen beeinflusst. Es ist normal, dass manchmal Gedanken oder Erinnerungen uns plötzlich wieder einfallen und uns schmerzen lassen.Es gibt jedoch Möglichkeiten, diese schmerzhaften Erinnerungen zu reduzieren und deine Angst zu lindern. Eine Möglichkeit besteht darin, d…
Ich fühle mich immer einsamer, keine Freunde, keine Verwandten, selbst wenn jemand in der Nähe ist, fühle ich mich sehr leer und unwohl	Es tut mir leid zu hören, dass du das Gefühl hast, immer einsamer zu sein. Es ist normal, dass manchmal die Umgebung oder das Umfeld uns wichtige Menschen vermisst oder dass wir uns selbst einsam fühlen. Es ist wichtig, dass du dich darüber im Klaren bist, dass du diese Gefühle habe und dass du Hilfe suchst.Es gibt jedoch Möglichkeiten, um deine Einsamkeit zu reduzieren und dich besser zu fühlen.…
Ich habe immer das Gefühl, dass ich mich nicht konzentrieren kann, Aufgaben nur schwer erledigen kann und oft müde und deprimiert bin	Es tut mir leid zu hören, dass du das Gefühl hast, dass du nicht konzentriert oder aufgeklärt bist. Es ist normal, dass manchmal die Aufgabenlast zu groß erscheint oder dass wir uns unsicher fühlen, ob wir die Aufgabe richtig erledigen können. Es ist wichtig, dass du dich darüber im Klaren bist, dass du das Gefühl hast und dass du Hilfe suchst.Es gibt jedoch Möglichkeiten, um deine Konzentrations…
Ich fühle mich oft einsam und verloren, bin nicht in der Lage, enge Beziehungen zu anderen aufzubauen und verliere sogar das Interesse und die Begeisterung für die Menschen und Dinge um mich herum.	Es ist verständlich, dass du dich einsam und verloren fühlst, wenn du Schwierigkeiten hast, enge Beziehungen aufzubauen und Vergleiche mit anderen aufzubauen. Es ist jedoch wichtig zu verstehen, dass diese Gefühle normal sind und dass viele Menschen ähnliche Probleme haben.Um diese Gefühle zu bekämpfen, könntest du versuchen, ein regelmäßiges Routine zu etablieren, das dich mit anderen umgeben. D…
Ich fühle mich allein und verloren und habe nicht das Gefühl, dass ich enge Beziehungen zu anderen Menschen aufbauen kann, was mich sehr deprimiert und hilflos macht	Es ist verständlich, dass du dich so fühlst. Es ist wichtig zu wissen, dass diese Gefühle normal sind und dass viele Menschen ähnliche Probleme haben. Es gibt jedoch einige Dinge, die du tun kannst, um deine Situation zu verbessern:1. Suche nach einem Therapeuten: Eine professionelle Unterstützung kann dir dabei helfen, deine Gefühle und Gedanken besser zu verstehen und zu bewältigen.2. Mach dich…
Alle um mich herum sind glücklich, aber ich fühle mich innerlich leer und unfähig, Freude zu empfinden	Es ist verständlich, dass du dich so fühlst, wenn du dich im Umfeld glücklicher Menschen umgeben siehst und dich selbst innerlich leer und unfähig fühlst, Freude zu empfinden. Es ist jedoch wichtig zu wissen, dass diese Gefühle normal sind und dass viele Menschen ähnliche Probleme haben.Es gibt jedoch einige Dinge, die du tun kannst, um deine Situation zu verbessern:1. Mach dich gerne hilfsbereit…
Ich hatte ein geringes Selbstwertgefühl und fühlte mich oft nutzlos und unbedeutend, was dazu führte, dass ich Angst hatte, meine Träume und Ziele zu verfolgen, Angst vor dem Scheitern und davor, von anderen herabgeschaut zu werden.	Es ist verständlich, dass Sie sich so fühlen, wenn Sie ein niedriges Selbstwertgefühl haben. Das kann zu Angst und Schamgefühlen führen, wenn Sie sich darauf vorbereiten, Ihre Träume und Ziele zu verfolgen. Es ist jedoch wichtig zu verstehen, dass Selbstwertgefühl und Selbstvertrauen nicht von natürlichen Gefühlen abhängen, sondern von den Einstellungen und Überzeugungen, die wir uns selbst und a…
Ich erlebe, dass ich gegenüber Dingen überempfindlich werde und mich oft wegen Kleinigkeiten unruhig und besorgt fühle	Das kann sich auf verschiedene Ursachen beziehen, zum Beispiel stressige Umstände, schlechte Schlafqualität oder auch eine persönliche Veranlagung. Es kann hilfreich sein, sich Zeit für Selbstreflexion und das Identifizieren von Stressorsichen zu nehmen, um den Ursachen entgegenzuwirken. Auch kann es hilfreich sein, sich regelmäßig zu entspannen und sich um die eigene körperliche und mentale Gesu…
Meine Eltern hatten immer hohe Erwartungen an mich, ein guter Mensch zu sein, aber ich hatte das Gefühl, dass ich ihren Ansprüchen nicht gerecht wurde, ich war ängstlich und hatte ein geringes Selbstwertgefühl	Es ist normal, dass man sich manchmal nicht gerecht behandelt oder dass man nicht in der Lage ist, die Erwartungen anderer zu erfüllen. Es kann hilfreich sein, sich Zeit für Selbstreflexion und das Identifizieren von Ursachen zu nehmen, um das eigene Selbstwertgefühl und die eigenen Bedürfnisse besser zu verstehen und anzugeben. Auch kann es hilfreich sein, sich regelmäßig Zeit für Entspannung un…
Ich träume jeden Tag und wiederhole es immer und immer wieder, als wäre ich in einem Labyrinth ohne Ausgang verloren	Es ist normal, dass manchmal träumebücher träumt. Es kann hilfreich sein, sich Zeit für Selbstreflexion und das Identifizieren von Träumethemen zu nehmen, um das eigene Selbstbewusstsein und die eigene Persönlichkeit besser zu verstehen und anzugeben. Auch kann es hilfreich sein, sich regelmäßig Zeit für Entspannung und Erholung zu nehmen und sich um die eigene körperliche und mentale Gesundheit …
Immer wenn ich allein bin, denke ich an alles, was vorher passiert ist, und alles macht mich so elend	Das kann sich auf verschiedene Ursachen beziehen, zum Beispiel traumatische Erfahrungen, schlechte Erinnerungen oder auch ein fehlendes Gleichgewicht zwischen den verschiedenen Bereichen des Lebens. Es kann hilfreich sein, sich Zeit für Selbstreflexion und das Identifizieren von Ursachen zu nehmen, um das eigene Selbstbewusstsein und die eigene Persönlichkeit besser zu verstehen und anzugeben. Au…
Wenn ich meinen Körper sehe, fühle ich mich so hässlich, so schlecht	Das ist sehr natürlich und verständlich. Es ist schwer, sich nicht von solchen Gedanken zu beeinflussen. Aber es gibt Dinge, die Sie tun können, um sich besser zu fühlen. Zum Beispiel können Sie versuchen, sich gut anzuziehen, was für mich selbstverständlich ist. Übernimmt man sich selbst, fühlt man sich am besten. Es ist wichtig, sich Zeit für sich selbst nehmen und sich auf ihre Bedürfnisse und…
Ich habe Autismus, ich weiß nicht, wie ich mit anderen kommunizieren soll, ich fühle mich isoliert in einer völlig anderen Welt, ich fühle mich sehr elend und hilflos.	Es ist verständlich, dass du weißt, wie schwer es für dich sein kann, mit anderen Menschen zu interagieren. Es gibt jedoch einige Dinge, die du tun kannst, um deine soziale Interaktion zu verbessern. Zum Beispiel kannst du versuchen, Interesse an den Hobbies und Interessen der anderen zu zeigen, um eine gemeinsame Basis für eine Diskussion zu schaffen. Du könntest auch versuchen, Fragen zu stelle…
Ich wurde einmal von einem Freund betrogen, es tat mir so weh, dass ich anfing, an der Verlässlichkeit von Menschlichkeit und Freundschaft zu zweifeln, und sogar anfing, mich selbst zu verschließen und andere zu entfremden	Es ist verständlich, dass du von der Verlässlichkeit von Menschlichkeit und Freundschaft getäuscht wurdest und dass dies emotional verletzend war. Es ist normal, dass du Zweifel an der Freundschaft hast und dich zurückziehst und dich von anderen entfremdest. Es ist wichtig zu verstehen, dass Betrug eine ernste und emotional verletzende Handlung ist und dass es für die Betrogenen schwierig sein ka…
In der heutigen Gesellschaft geben Menschen oft sich selbst auf oder begehen sogar Selbstmord, weil sie ihre Arbeit nicht zu Ende bringen können.	Es ist wahr, dass die heutige Gesellschaft eine hohe Kompetenz und Produktivität verlangt und dass viele Menschen darunter leiden, wenn sie diese Erwartungen nicht erfüllen können. Es gibt jedoch viele Dinge, die man tun kann, um sich selbst zu unterstützen und sich auf die Dinge zu konzentrieren, die für dich wichtig sind. Zum Beispiel können Sie versuchen, sich auf deine Prioritäten zu konzentr…
Ich denke immer über meine Vergangenheit und Zukunft nach und fühle mich deswegen ängstlich und unruhig. Ich weiß nicht, wie ich damit umgehen soll.	Es ist normal, dass wir uns über unsere Vergangenheit und Zukunft Gedanken machen. Diese Gedanken können jedoch auch unsere emotionalen Zustände beeinflussen und uns dazu verleiten, uns ängstlich und unruhig zu fühlen.Um mit diesen Gefühlen umzugehen, gibt es einige Dinge, die du erwägen kannst:1. Vertraue auf deinen Körper: Wenn du sich merkwürdig anfühlst, deine Hände zittern oder du dich unbeh…
Immer wenn ich einer großen Gruppe von Menschen gegenüberstehe, fühle ich mich immer sehr unbehaglich.	Es ist normal, vor einer großen Gruppe von Menschen zu zittern oder sich unbehaglich zu fühlen. Manchmal gibt es jedoch bestimmte Faktoren, die dazu beitragen können, dass diese Ängste verschlimmert werden. Hier sind einige Tipps, die dir helfen können, deine Unbehagen zu reduzieren:1. Achte auf deine Körpersprache: Sei bewusst, wie du dein Körper einteilst. Fühl dich intensiv und konzentriere di…
Ich bin mit meinem Aussehen unzufrieden und fühle mich immer hässlich, was mich sehr unsicher macht, wenn es darum geht, Kontakte zu knüpfen und Freunde zu finden. Wie kann ich diese Mentalität ändern?	Es ist normal, sich unzufrieden mit deinem Aussehen zu fühlen, und es ist auch in Ordnung, unsicher zu sein, wenn es darum geht, Kontakte zu knüpfen und Freunde zu finden. Es gibt jedoch einige Dinge, die du tun kannst, um deine Mentalität zu ändern:1. Verwende positive Selbstgespräche: Versuche, deine Gedanken positiv zu gestalten. Sag dir selbst, dass du schön bist und dass es viele Menschen gi…
Ich bin voller Angst und Furcht vor der Zukunft und weiß nicht, wie ich mit den Herausforderungen und dem Druck der Zukunft umgehen soll.	Es ist normal, Angst und Furcht vor der Zukunft zu empfinden, insbesondere wenn Sie sich mit neuen Herausforderungen und Druck konfrontiert sehen. Es ist wichtig, dass Sie sich jedoch bewusst machen, dass es Möglichkeiten gibt, um mit diesen Gefühlen umzugehen und die Zukunft bewältigen zu können. Eine Möglichkeit ist, Ihre Angst und Furcht zu verstehen und zu akzeptieren. Sie können versuchen, s…
Ich stecke ständig in unaufhaltsamen Gedankenschleifen fest und grübele immer wieder über dasselbe Problem oder dieselbe Situation, was zu Schlaf- und Alltagsstörungen führt.	Es scheint, dass du in einer sehr belastenden Situation findest. Gedankenschleifen können dazu führen, dass man sich immer wieder mit einem bestimmten Thema auseinandersetzt und es schwierig ist, sich auf andere Aufgaben oder Dinge zu konzentrieren. Dies kann zu Störungen des Schlafes und der Alltagsfähigkeit führen.Es gibt verschiedene Ansätze, um mit solchen Gedankenschleifern umzugehen. Eine M…
Ich habe einige traumatische Erfahrungen gemacht, die mir im Gedächtnis geblieben sind. Es fiel mir schwer, diese Emotionen und Erinnerungen zu verarbeiten, was dazu führte, dass sich meine geistige Gesundheit allmählich verschlechterte.	Es ist verständlich, dass traumatische Erfahrungen einen großen Einfluss auf die geistige Gesundheit haben können. Es kann schwierig sein, diese Emotionen und Erinnerungen zu verarbeiten, und dies kann dazu führen, dass sich die geistige Gesundheit verschlechtert.Es gibt verschiedene Ansätze, um mit traumatischen Erinnerungen und Emotionen umzugehen. Eine Möglichkeit ist es, sich an einen Therape…
Ich fühle mich oft deprimiert und deprimiert, verliere die Freude und Motivation des Lebens und habe kein Vertrauen in die Zukunft. Dieses Gefühl macht mich sehr schmerzhaft und hilflos	Es ist verständlich, dass das Gefühl von Depressionen sehr schmerzhaft und hilflos sein kann. Es kann schwierig sein, Freude und Motivation für das Leben zu finden und sich Vertrauen in die Zukunft zuzutrauen, wenn man sich von Depressionen überwältigt fühlt.Es gibt verschiedene Ansätze, um mit Depressionen umzugehen. Eine Möglichkeit ist es, sich an einen Therapeuten oder eine Psychologin zu wen…
In letzter Zeit verlieren ihre Kinder häufig die Beherrschung und zerstören sogar Gegenstände im Haus, was ein Symptom einer Depression sein kann	Es ist möglich, dass die Verhaltensveränderungen Ihrer Kinder ein Symptom einer Depression sein können. Kinder können ihre emotionalen Verarbeitungsfähigkeiten nicht so gut wie Erwachsene und sind daher anfälliger für Ängste und Stimmungsschwankungen. Eine Depression kann verschiedene Verhaltensveränderungen verursachen, einschließlich der Verringerung der Motivation und Energie, emotionaler Ausb…
Ich fühle mich oft gestresst und ängstlich, selbst kleine Dinge können mich unruhig und angespannt machen, es fällt mir schwer, mich zu entspannen und das Leben zu genießen	Es ist verständlich, dass du dich gestresst und ängstlich fühlst, wenn du mit einigen Aspekten deines Lebens unzufrieden bist. Es ist wichtig, dass du dich dafür anziehst und bereit bist, Veränderungen vorzunehmen. Hier sind einige Schritte, die du unternehmen kannst, um deine Stress- und Ängstigkeitsgefühle zu reduzieren:1. **Erkenne und beschreibe deine Gefühle**: Versuche, deine Emotionen gena…
Ich bin sehr unzufrieden mit meinem Körper, fühle mich immer zu dick oder zu dünn und weiß nicht, wie ich meinen Körper akzeptieren soll	Es ist verständlich, dass du dich unzufrieden mit deinem Körper fühlst und dass du Schwierigkeiten hast, ihn zu akzeptieren, wie er ist. Es ist wichtig, dass du dich anziehst und bereit bist, Veränderungen vorzunehmen, um deine Beziehung zu deinem Körper zu verbessern. Hier sind einige Schritte, die dir helfen können, deine Wahrnehmung und Beziehung zu deinem Körper zu verändern:1. **Liebest dich…
Mir fehlt das Vertrauen in meine eigene Leistung und mein Können. Ich habe immer das Gefühl, dass ich es nicht gut kann, und ich habe Angst vor dem Scheitern und davor, von anderen ausgelacht zu werden.	Es ist verständlich, dass du das Gefühl hast, dass du nicht gut genug bist und dass du Angst hast, scheitern zu gehen und ausgelacht zu werden. Du könntest Schwierigkeiten haben, deine Leistungen zu verbessern, wenn du nicht das Vertrauen in deine eigene Fähigkeit hast. Hier sind einige Schritte, die dir helfen können, dein Selbstvertrauen und dein Selbstbewusstsein zu stärken:1. **Dein Potenzial…
Meine Stimmung schwankte wild, von sehr hoch bis sehr tief, ohne jedes Muster.	Meine Stimmung schwankte wild, zwischen höchster Erregung und tiefster Verzweiflung, ohne jeglichen Abstand.
Wenn ich in einer Menschenmenge bin, fühle ich mich immer ignoriert, sogar unsichtbar. Das macht mich sehr einsam und verloren.	Es ist begreiflich, dass das Gefühl, von anderen ignoriert zu werden, einschneidend sein kann. Es ist wichtig zu verstehen, dass das Ignorieren nicht immer eine negative Absicht hat. Vielleicht fällt Ihre Aufmerksamkeit nicht auf, weil Sie eine introvertierte Persönlichkeit haben oder Ihre Kommunikationsfähigkeiten nicht so gut sind wie die anderer. Es ist auch möglich, dass Sie nicht in der rich…
Ich habe oft das Gefühl, dass ich nicht gut genug bin, um die Anerkennung und den Respekt anderer zu gewinnen	Das Gefühl, dass man nicht gut genug ist, um die Anerkennung und Respekt anderer zu gewinnen, ist ein allgemeines Phänomen und tritt bei vielen Menschen auf. Es kann sich auf viele verschiedene Faktoren beziehen, wie zum Beispiel das Fehlen von Selbstvertrauen, das Zweifeln an eigenen Fähigkeiten oder das Gefühl, dass man sich nicht genug bewiesen hat.Ein wichtiger Teil des Prozesses der Selbstve…
Ich bin verwirrt und hilflos, was die Zukunft angeht, ich weiß nicht, in welche Richtung ich gehen soll, es macht mich sehr ängstlich und unruhig	Es ist verständlich, dass man in einer Situation wie dieser unsicher und verwirrt sein kann. Es kann hilfreich sein, sich Gedanken zu machen, was für Sie wichtig ist und welche Ziele Sie haben. Mach dir dann eine Liste davon und setze dir realistische Ziele, die du erreichen möchtest.Es kann auch hilfreich sein, sich auf deine Umgebung zu konzentrieren und zu wissen, was dir hilft und was dir sch…
Ich hatte immer Angst, dass meine Handlungen und Entscheidungen von anderen kritisiert und missbilligt würden, was mich sehr verunsicherte und frustrierte.	Es ist verständlich, dass man sich von anderen kritisch beurteilen und ablehnen würde, wenn man sich selbst kritisch beurteilt und ablehnt. Es kann hilfreich sein, sich Gedanken zu machen, wie man diese Ängste löst und wie man sich selbst besser schützt und stärkt.Eine Möglichkeit, diese Ängste zu lösen, ist es, sich auf die positiven Ergebnisse und Erfolge zu konzentrieren, die man selbst erziel…
Ich möchte mich umbringen, aber ich traue mich nicht, ich möchte mich nur verstecken und nie wieder herauskommen	Es ist bedauerlich zu hören, dass Sie sich solch schweren Gefühlen aussetzen und das Gefühl haben, dass es kein Ende in Sicht ist. Ich möchte Sie dafür unterstützen, dass es immer gut ist, wenn jemand hilfuchbar ist. Es gibt jedoch einige Dinge, die Sie tun können, um sich selbst besser zu fühlen und sich auf die Zukunft zu konzentrieren. 1. Rufen Sie eine Notrufnummer auf. Es gibt keine Scham da…
Meine Familie kritisiert mich immer und verletzt mich sehr. Ich weiß nicht, wie ich mit ihnen kommunizieren soll, sie sind mir gegenüber so distanziert	Es ist verständlich, dass du dich mit deiner Familie auseinander setzen möchtest, aber es ist wichtig, sicherzustellen, dass du dich nicht in eine Situation stürzt, die dich weiter belastet oder gefährdet.Wenn du das Gefühl hast, dass du nicht gut gehört oder verstanden wirst, könnte es hilfreich sein, konstruktive Kommunikationsfehler zu vermeiden. Hier sind einige Tipps:1. Verwende eine offene …
Früher war ich über Kleinigkeiten frustriert, hatte Probleme, mich von emotionalen Tiefpunkten zu erholen, und fühlte mich wertlos.	Es ist normal, dass manchmal Probleme und Herausforderungen hat, insbesondere in unserer modernen Welt, die voller Konflikte und Stressors ist. Es ist wichtig zu wissen, dass es Veränderungen im Denken und in der Einstellung gibt, die dir helfen können, deine Lebensqualität zu verbessern und deine emotionalen Probleme zu lösen.Einige Schritte, die du unternommen könntest, um deine Lage zu verbess…
Ich wurde von meinen Mitschülern gemobbt, was zu einem chronisch geringen Selbstwertgefühl und Angst vor Ablehnung führte.	Es ist verständlich, dass du dich aufgrund von Mobbing in deinem Umfeld sauer fühlst und dass dies zu einem chronischen Selbstwertverlust und Angst vor Ablehnung geführt hat. Es ist wichtig, dass du etwas gegen diese Situation unternehmen, um deine Selbstachtung und Vertrauen wiederzubauen.Einige Schritte, die dir helfen können, um diese Herausforderung anzugehen, sind:1. Kommunizieren: Überlege,…
In letzter Zeit habe ich immer das Gefühl, dass meine Stimmung stark schwankt. Manchmal bin ich glücklich, aber manchmal bin ich ohne Grund deprimiert. Das macht mir große Sorgen. Ich weiß nicht, ob ich an einer Depression leide.	Es ist normal, dass die Stimmung schwankt, aber wenn diese Schwankungen häufig sind und deprimierend sind, kann es eine Anzeichen dafür sein, dass Sie eine Depression erleben. Ein wichtiger Aspekt von Depression ist, dass sie sich nicht nur auf Ihre Stimmung auswirkt, sondern auch auf Ihre Alltagsfunktionen wie Konzentration, Gedächtnis und Schlaf. Es kann auch zu Selbstmordgedanken kommen. Es is…
Ich war so gestresst, ich hatte das Gefühl, überwältigt zu werden, ich fühlte mich oft nervös oder atemlos.	Als Folge des Stresss und der Überforderung der letzten Woche habe ich das Gefühl gehabt, überwältigt zu werden. Ich habe oft den Eindruck gehabt, dass alles zu viel für mich war und dass ich nicht mehr meine Aufgaben ausführen konnte. Ich habe auch oft nervös und atemlos gefühlt.
Ich habe oft Angst- und Furchtgefühle, ohne zu wissen, woher sie kommen, und manchmal fällt mir sogar das Atmen schwer.	Als Folge des Stresss und der Überforderung der letzten Woche habe ich oft Angst- und Furchtgefühle gehabt, ohne zu wissen, woher sie kommen. Zufällig habe ich das Gefühl, dass ich atmen muss, und es fällt mir schwer, Luft zu holen.
Ich habe mich immer wertlos gefühlt, nicht gut genug, nicht klug genug, nicht hübsch genug, und das ist frustrierend	Als Folge des Stresss und der Überforderung der letzten Woche habe ich mich ständig wertlos gefühlt und mir das Gefühl gegeben, nicht gut genug, nicht klug genug, nicht hübsch genug zu sein. Dies ist sehr frustrierend und hat mich oft in eine negative Einstellung versetzt.
Ich habe ständig Selbstmordgedanken, ich habe das Gefühl, dass das Leben keinen Sinn hat und keinen Wert hat. Ich fühle mich auch hoffnungslos und habe das Gefühl, dass es keine Hoffnung für meine Zukunft gibt	Als Folge des Stresss und der Überforderung der letzten Woche habe ich ständig Selbstmordgedanken gehabt und das Gefühl gehabt, dass das Leben keinen Sinn hat und keinen Wert hat. Ich habe auch das Gefühl gehabt, hoffnungslos zu sein und dass es keine Hoffnung für meine Zukunft gibt. Dies hat mich oft in eine negative Einstellung versetzt und hat mich sehr belastet.
Ich habe oft das Gefühl, dass mein Leben bedeutungslos ist, ich weiß nicht, warum ich so lebe, ich habe das Gefühl, keinen Zweck zu haben, keine Motivation, es ist, als würde ich meine Zeit verschwenden, ich fühle mich wertlos	Das Gefühl, dass das Leben bedeutungslos ist, ist für viele Menschen ein häufiges Erlebnis. Es ist jedoch wichtig zu verstehen, dass dies ein normaler Bestandteil des menschlichen Erfahrungsrahmens ist und dass es viele Wege gibt, um dieses Gefühl zu reduzieren und das Leben auf positive Weise zu gestalten.Eine wichtige Tatsache, die man beachten sollte, ist, dass das Leben selbst dann noch bedeu…
Ich fühle mich in letzter Zeit sehr gestresst, weil ich viel Arbeit habe und jeden Tag viele Aufgaben erledigen muss, aber ich habe kein Erfolgserlebnis, was mich sehr frustriert. Wie kann ich damit umgehen? psychischer Druck?	Es ist verständlich, dass man unter psychischem Druck leiden kann, wenn man viel Arbeit hat und viele Aufgaben erledigen muss, ohne dass man Erfolgserlebnisse hat. Es gibt jedoch einige Strategien, die man anwenden kann, um mit diesem Problem umzugehen.Eine Möglichkeit ist, sich Zeit zu nehmen, um über das Problem nachzudenken und zu überlegen, wie man es lösen kann. Es kann auch helfen, sich mit…
Ich verspüre oft Ängste und Anspannung und habe das Gefühl, den Belastungen und Herausforderungen des Lebens nicht gewachsen zu sein.	Es ist verständlich, dass man Ängste und Anspannung verspüren kann, wenn man sich den Belastungen und Herausforderungen des Lebens stellen sieht. Es ist wichtig, dass man weiß, wie man mit diesen Gefühlen umgehen kann.Eine Möglichkeit, um mit diesen Gefühlen umzugehen, ist es, sich Zeit zu nehmen, um über das Problem nachzudenken und zu überlegen, wie man es lösen kann. Es kann auch helfen, sich …
Mein Geist ist voller Negativität und Selbstzweifel und ich weiß nicht, wie ich da rauskomme	Es ist verständlich, dass Sie sich von negativen Gedanken und Selbstzweifeln befallen fühlen, aber es gibt Dinge, die Sie tun können, um sich besser zu fühlen und sich auf die Zukunft zu konzentrieren. 1. Aufschreiben von positiven Aspekten Ihrer life: Schreiben Sie Dinge auf, die Sie gut an Ihrem Leben haben, egal ob es kleinere Dinge oder größere Erfolge sind. 2. Aktivitäten aufnehmen, die Ihne…
Ich habe das Gefühl, dass meine Emotionen immer instabiler werden. Manchmal fühle ich mich deprimiert und manchmal bin ich wieder emotional. Ich weiß nicht, ob mit meinem Geist etwas nicht stimmt.	Es ist normal, dass manchmal Emotionen instabiler sind, insbesondere in Zeiten von Stress oder Änderungen im Leben. Wenn diese instablen Momenten jedoch häufiger und intensiver werden und Ihre alltäglichen Aktivitäten beeinträchtigen, könnte dies ein Anzeichen für eine psychische Störung sein.Es wäre empfehlenswert, sich einen Therapeuten oder einen Arzt zu einem Termin zu suchen, um Ihre Gefühle…
Wenn das Kind nach der Schule nach Hause kommt, ist das Zuhause kalt und frostig, und es wird nie seine Freundlichkeit akzeptiert. Nur wenn es Fehler gemacht hat, fühlt es sich leer und besorgt. Die Sorge ist, ob es, wenn es erwachsen ist, auch wie seine Eltern wird.	Es ist leider nicht ungewöhnlich, dass Kinder oft ihre Persönlichkeit und ihre Emotionen nicht ausdrücken können. Manchmal können Eltern dazu neigen, die eigenen Gefühle und Bedürfnisse auf die Kinder zu projizieren und diese so zu belasten.Es ist wichtig, dass jeder Mensch die Möglichkeit hat, seine Gefühle und Bedürfnisse auszudrücken und diese respektiert zu werden. Wenn das Kind regelmäßig na…
Er kann fast jede Nacht nicht schlafen, kann nicht schlafen und nicht einschlafen, seine Stimmung wird immer schlechter und er macht sich Sorgen, ob er Depressionen oder andere schwerwiegendere psychische Probleme bekommen wird	Es ist leider nicht ungewöhnlich, dass Kinder und Jugendliche Schwierigkeiten haben, sich Schlaf zu verschaffen. Insbesondere bei Stress, Angst oder Unsicherheit, kann es schwierig sein, sich in einen entspannten Zustand zu versetzen und schlafen zu können. Es gibt jedoch auch andere Gründe, warum ein Kind Schwierigkeiten haben könnte, sich zu schlafen, wie zum Beispiel ein schlechter Schlafstil,…
In letzter Zeit habe ich immer das Gefühl, verletzlich zu sein, und meine Gedanken sind wie ein Durcheinander von Seilen, die ich nicht fassen kann	Es scheint, dass Sie momentan eine große Menge an Emotionen und Gedanken haben, die es schwierig für Sie ist, sie zu organisieren und zu verstehen. Die Metapher des Durcheinanders von Seilen, von denen Sie nicht fassen kann, könnte darauf hindeuten, dass Sie sich selbst oder Ihre Gedanken verwirrt fühlen und es schwierig ist, sie zusammenzufassen. Es ist wichtig zu beachten, dass Verletzlichkeit …
Jedes Mal, wenn ich an meine Fehler denke, fühle ich mich hilflos, ich verliere den Mut bei dem Gedanken, von der Gesellschaft nicht akzeptiert zu werden, ich fühle mich hilflos bei dem Gedanken, dass ich meine Träume vielleicht nicht verwirklichen kann	Das ist verständlich, da es normal ist, Fehler zu machen und sich darüber zu schämen. Es ist jedoch wichtig, diese negative Gedanken und Gefühle nicht zu laßen, die sich aus ihnen ergeben können. Stattdessen sollten Sie versuchen, sich auf Ihre Stärken und Erfolge zu konzentrieren, und daran zu denken, dass jeder Fehler ein Lernmöglichkeit ist. Sie können auch darüber nachdenken, wie Sie in Zukun…
Meine Beziehung war schon immer instabil, ich erlebe oft emotionalen Stress, weiß nicht, wie ich mit Beziehungsproblemen umgehen soll, ich fühle mich dadurch machtlos und verloren.	Es ist verständlich, dass du in einer instabilen Beziehung dich unsicher fühlst und dass du nicht weißt, wie du damit umgehen sollst. Es kann hilfreich sein, über deine Gefühle und Bedürfnisse zu sprechen und sich mit einer professionellen Therapeutin oder einem Psychologen zu besprechen. Sie können dir dabei helfen, dich auf deine eigenen Bedürfnisse und Wünsche einzustellen und dir helfen, Stra…
Manchmal verliere ich die Kontrolle und werde sehr gereizt und gereizt und verliere sogar die Beherrschung gegenüber meinen Mitmenschen	Verlieren Sie die Kontrolle und werden Sie sehr gereizt, kann für viele Menschen eine große Herausforderung sein. Es ist wichtig zu wissen, dass es normal ist, manchmal aufgeregt oder erregt zu sein. Wenn dies jedoch ein regelmäßiges Problem ist und es Ihre Lebensqualität beeinträchtigt, kann es hilfreich sein, darüber nachzudenken, warum Sie so leicht aufgeregt werden und welche Strategien Sie d…
Mein Job ist stressig und der tägliche Umgang mit Problemen und Herausforderungen macht mir große Sorgen, ich fange an, schlaflos zu sein, den Appetit zu verlieren und manchmal das Gefühl zu verlieren, die Kontrolle zu verlieren	Es ist verständlich, dass ein stressvoller Job und der tägliche Umgang mit Problemen und Herausforderungen Ihre Gesundheit und Ihre Lebensqualität beeinträchtigen könnte. Stress kann dazu führen, dass man schlafen kann und verliert den Appetit. Es kann auch dazu führen, dass man das Gefühl hat, die Kontrolle zu verlieren. Es gibt verschiedene Strategien, die Sie anwenden können, um das Stressleve…
Ich kann meine Emotionen immer nicht zurückhalten. Manchmal werde ich plötzlich wütend, manchmal verstumme ich plötzlich, wodurch ich mein eigenes Verhalten und meine Leistung nicht vorhersagen kann und ich mich sehr verstört und verwirrt fühle.	Es ist verständlich, dass du dich verwirrend fühlst, wenn du deine Emotionen nicht unter Kontrolle hast. Verwirrung und Unsicherheit können dazu führen, dass du schwierig zu verstehen und zu kommunizieren kannst. Es ist wichtig, dass du versuchst, deine Emotionen zu erkennen und zu verstehen, wenn sie auftreten. Wenn du das nicht kannst, kann es hilfreich sein, einen Therapeuten oder Coach zu kon…
Ich kann die Verstrickung mit unangenehmen Erfahrungen aus der Vergangenheit nicht loswerden, und wann immer ich an diese Ereignisse denke, verspüre ich unerträglichen Schmerz und Verlust.	Es kann schwierig sein, Verstrickungen in Vergangenheitserlebnisse zu überwinden, insbesondere wenn diese Erfahrungen sehr emotionalisiert waren. Es ist jedoch wichtig zu erkennen, dass Vergangenheitserlebnisse nicht mehr an Ihrer heutigen Situation ändern können. Es kann hilfreich sein, professionelle Hilfe in Anspruch zu nehmen, um in diese Verstrickungen einzutauchen und sie zu lösen. Eine the…
Ich fühle mich oft einsam und hilflos, es gibt niemanden, der mit meiner inneren Welt sprechen kann, ich fühle mich von der Welt verlassen, es macht mich sehr schmerzhaft und hoffnungslos.	Es ist verständlich, dass du dich oft einsam und hilflos fühlst, wenn du keine Unterstützung oder Verständnis von anderen bekommst. Es ist wichtig zu erkennen, dass es anderen gibt, die in deiner inneren Welt mit dir sprechen und dir helfen können. Wenn du dich für eine therapeutische Behandlung entscheidest, kannst du einen Therapeuten oder Coach finden, der dich unterstützen und verstehen kann.…
Aufgrund meiner Unzulänglichkeiten fühle ich mich oft minderwertig und hilflos, habe das Gefühl, dass ich nicht gut genug und der Liebe nicht würdig bin	Es ist verständlich, dass du in deinen Unzulänglichkeiten oft das Gefühl von Mindermächtigkeit und Hilflosigkeit empfindest und das Gefühl hast, dass du nicht gut genug oder würdig bist. Es ist wichtig zu erkennen, dass jeder Mensch Fehler und Schwächen hat und dass es nicht notwendig ist, perfekt zu sein, um liebenswert zu sein. Es ist hilfreich, sich Zeit zu nehmen, um deine Stärken und positiv…
Ich stehe unter großem Arbeits- und Lerndruck und fühle mich oft erschöpft, weiß aber nicht, wie ich mich entspannen und Stress abbauen kann.	Es ist normal, unter Druck zu stehen und sich zu fühlen, wenn man viel arbeitet und lernt. Um Stress abzubauen und sich zu entspannen, gibt es einige Dinge, die man tun kann. Es ist wichtig, dass man diese Regeln in Einklang mit sich selbst bringt und sie für sich selbst relevant finden.1. Schlafen genug: Eine ausreichende Schlafqualität ist wichtig, um sich zu regenerieren und Stress abzubauen. …
Meine Stimmung ändert sich so schnell, dass es nur eine Weile dauert, von fröhlich zu traurig zu wechseln. Warum ist das so?	Es ist nicht ungewöhnlich, dass Stimmungen schnell wechseln, insbesondere in Zeiten von Stress, Angst oder Emotionen, die intensiv sind. Es kann auch sein, dass die Stimmung durch bestimmte Ereignisse oder Umstände beeinflusst wird, die für uns persönlich besonders wichtig sind.Es gibt jedoch einige Faktoren, die dazu beitragen können, die Stimmungschange zu verstärken. Hier sind einige mögliche …
Es ist wahrscheinlicher, dass ich die Geduld verliere als andere, und wenn ich kleine Dinge erledige, fühle ich mich unnötig deprimiert und an meine Grenzen gebracht	Es ist verständlich, dass man in bestimmten Situationen Schwierigkeiten beim Erreichen von Zielen hat und sich darüber deprimiert fühlt. Es kann helfen, das Problem zu lösen, sich Geduld zu üben und das Problem in kleinere Schritte aufzuteilen. Hier sind einige Schritte, die man unternehmen kann, um die Geduld zu verbessern und sich besser zu fühlen:1. Verwenden Sie eine Aufgabenliste: Erstellen …
Jedes Mal, wenn ich darüber nachdenke, zum Arzt zu gehen oder einen Therapeuten aufzusuchen, fühle ich mich eingeschüchtert und unsicher. Ich habe Angst, dass meine Probleme ans Licht kommen und von anderen beurteilt werden. Diese Angst hält mich davon ab, Hilfe zu suchen.	Es ist normal, Angst zu haben, dass Ihre Probleme ans Licht kommen und von anderen beurteilt werden. Diese Angst kann dazu führen, dass Sie sich nicht um sich selbst kümmern und dennoch Hilfe benötigen. Es ist jedoch wichtig zu verstehen, dass Hilfe von einem Arzt oder Therapeuten nicht nur dazu dient, Ihre Probleme zu behandeln, sondern auch dazu, Ihre Gedanken und Emotionen zu verstehen und zu …
Ich habe am Arbeitsplatz viele Rückschläge und Ungerechtigkeiten erlebt, was mich in meinem Leben sehr frustriert und hoffnungslos macht	Es ist verständlich, dass Sie sich aufgrund von Rückschlägen und Ungerechtigkeiten am Arbeitsplatz frustriert und hoffnungslos fühlen. Diese Erfahrungen können zu einer tiefen Verletzung der Selbstwertgefühle und der Motivation führen.Es ist wichtig, dass Sie sich von diesen negativen Emotionen befreien und Ihre Zukunft in die Hand nehmen. Hier sind einige Schritte, die Ihnen bei der Bewältigung …
Ich wurde von meinen Klassenkameraden diskriminiert und manchmal habe ich das Gefühl, dass das Leben keinen Sinn hat	Es ist sehr verständlich, dass Sie sich aufgrund von Diskriminierung von Ihren Klassenkameraden frustriert fühlen und das Leben als sinnlos empfinden. Diese Erfahrungen können sehr traumatisch und verletzlich machen.Es ist wichtig, dass Sie sich von diesen negativen Emotionen befreien und Ihre Zukunft in die Hand nehmen. Hier sind einige Schritte, die Ihnen bei der Bewältigung dieser Herausforder…
Ich bin mit meinem Körper und meinem Aussehen sehr unzufrieden und kritisiere und verleugne mich ständig selbst, was sich sogar auf mein tägliches Leben und meine sozialen Aktivitäten auswirkt	Es ist verständlich, dass Sie sich aufgrund Ihrer Unzufriedenheit mit Ihrem Körper und Ihrem Aussehen sehr frustriert fühlen und dass dies sich auf Ihr tägliches Leben und Ihre sozialen Aktivitäten auswirken kann. Diese Erfahrungen können sehr traumatisch und verletzlich machen.Es ist wichtig, dass Sie sich von diesen negativen Emotionen befreien und Ihre Zukunft in die Hand nehmen. Hier sind ein…
In letzter Zeit fühle ich mich oft müde und kraftlos, selbst das Besteigen einer Treppe ist anstrengend für mich. Sollte ich vielleicht zum Arzt gehen?	Es ist wichtig, dass Sie sich von Ihren Symptomen untersuchen lassen, falls Sie sich ängstlich fühlen. Es gibt viele Gründe, warum Sie müde und kraftlos fühlen könnten, und es ist wichtig, diese Ursachen zu identifizieren und zu behandeln.Ich würde empfehlen, dass Sie einen Arzt aufsuchen, um Ihre Symptome zu untersuchen und mögliche Ursachen zu identifizieren. Ihr Arzt können Ihnen mögliche Diag…
Ich habe das Gefühl, dass ich meine Emotionen und mein Verhalten nicht kontrollieren kann und oft impulsive Entscheidungen treffe. Ist das eine Geisteskrankheit? Wie behandelt man es?	Es ist wichtig, dass Sie sich nicht selbst bei einer Geisteserkrankung darstellen. Impulsive Entscheidungen treffen und Schwierigkeiten bei der Kontrolle Ihrer Emotionen können ein Teil mancher psychischer Störungen sein, aber es ist nicht jedem von ihnen zugeordnet. Es ist am besten, sich jemanden zuzuwenden, der im Bereich der Psychiatrie oder Psychologie erfahren ist, um eine gute Diagnose zu …
Unterdrücke alle negativen Emotionen in meinem tiefsten Inneren, erlaube mir nicht, ein bisschen verletzlich zu sein, aber ich kann mich nicht zurückhalten	Es ist wichtig, dass Sie in der Lage sind, Ihre negativen Emotionen zu erkennen und zu verarbeiten, um eine positive psychische Gesundheit zu erhalten. Es kann hilfreich sein, verschiedene Techniken wie Meditation, Denken an Positives oder zu spüren, was Ihnen beim Lachen oder bei anderen positiven Gefühlen hilft, um diese Emotionen zu verarbeiten.Es ist auch wichtig, dass Sie sich nicht dazu zwi…
Wir haben die ganze Zeit gestritten und jedes Mal hatten wir ein paar schmerzhafte Worte und haben Schluss gemacht	Es ist normal, dass es in einer Beziehung zu Streitigkeiten kommen kann. Es ist wichtig, dass Sie jedoch versuchen, eine gesunde Kommunikation zu pflegen und sich sicher zu fühlen, dass Sie beide die Möglichkeit haben, Ihre Meinungen und Bedürfnisse auszudrücken und zu verstehen, ohne dass es zu aggressiven oder schmerzhaften Ausdrücken kommt. Es kann auch hilfreich sein, sich regelmäßig zu evalu…
Als Xiao Zhang auf der Straße ging, hatte er immer das Gefühl, dass die Menschen um ihn herum ihn anstarrten, und sein Geisteszustand wurde immer instabiler	Es ist möglich, dass Xiao Zhangs Angst vor der öffentlichen Meinung eine Form von Social Anxiety Disorder ist. Social Anxiety Disorder ist ein Psychischer Gesundheitsstörung, die durch das übermäßige Angstgefühl und Bedenken bestimmt wird, öffentlich dargestellt zu werden oder in der Gesellschaft unangemessen zu wirken. Es kann dazu führen, dass jemand sich unangenehm fühlt oder sich unwohl fühlt…
Ich habe das Gefühl, dass es ein Problem in meiner zwischenmenschlichen Beziehung gibt. Es ist schwierig, mit Freunden, Familienmitgliedern und Kollegen zu kommunizieren und zu kommunizieren. Manchmal kommt es sogar zu Konflikten und Streitigkeiten. Dadurch fühle ich mich sehr frustriert und hilflos. Ich weiß es nicht wie man gesunde Beziehungen aufbaut	Es ist verständlich, dass du das Gefühl hast, dass es ein Problem in deiner zwischenmenschlichen Beziehung gibt. Es kann schwierig sein, mit anderen Menschen zu kommunizieren und zu verstehen, wenn es zum Streit oder Konflikt kommt. Es ist wichtig zu verstehen, dass zwischenmenschliche Beziehungen nicht immer einfach sind und dass es möglicherweise Anpassungen und Arbeit erfordert, um gesunde Bez…
Ich war unzufrieden mit meinem Aussehen und meinem Körper und war ständig selbstverurteilend und zweifelte an mir selbst, was zu einem geringen Selbstvertrauen und Selbstwertgefühl führte.	Es ist verständlich, dass du in der Vergangenheit mit deinem Aussehen und deinem Körper unzufrieden warst und dass du dich selbst verurteilt hast. Selbstwerdierraum und Selbstbewusstsein sind wichtige Faktoren für ein gesundes Selbstwertgefühl und eine positive Lebensqualität. Es ist auch verständlich, dass du Zweifel an dir selbst gehabt hast, wenn du dich selbst verurteilt hast und dass du Schw…
Ich fühle mich oft allein und hilflos, als würde mich niemand wirklich verstehen, und es fällt mir schwer, mit Menschen in Kontakt zu treten, was mich stört und es schwierig macht, eine Lösung zu finden	Es ist verständlich, dass du oft allein und hilflos fühlen solltest und dass du das Gefühl hast, dass du niemand wirklich verstehst. Es ist auch verständlich, dass du Schwierigkeiten hast, mit Menschen in Kontakt zu treten, da dies für dich ein Herausforderung ist. Es ist wichtig, dass du weißt, dass du nicht alleine stehst und dass du Hilfe und Unterstützung von anderen Menschen suchen kannst.Es…
Nach der Scheidung meiner Eltern lebe ich im Haus meiner Großmutter. Obwohl ich bei meiner Mutter lebe, habe ich immer das Gefühl, dass sie fremder ist als meine Großmutter, und ich weiß nicht, wie ich mit ihr kommunizieren soll.	Es ist verständlich, dass du das Gefühl hast, dass deine Mutter fremder ist als deine Großmutter. Dies kann ein schwieriges Problem sein, aber es gibt einige Dinge, die du tun kannst, um deine Beziehung zu deiner Mutter zu verbessern. Eine Möglichkeit, um deine Beziehung zu verbessern, ist es, deine Großmutter um Hilfe zu bitten. Du kannst ihr sagen, dass du das Gefühl hast, dass deine Mutter fre…
Meine Misserfolge sind zahlreicher als meine Erfolge. Immer öfter tröste ich mich selbst mit der Vorstellung, dass harte Arbeit zwangsläufig belohnt wird. Doch die Realität enttäuscht oft.	Verstanden. Um Ihre Verantwortung gegenüber Ihrem Unternehmen und Ihren Kunden wahrzunehmen, werden Sie möglicherweise einfach nur ein wenig unentschlossen sein und Schwierigkeiten haben, Entscheidungen zu treffen. Sie könnten auch Schwierigkeiten haben, sich auf Ihre Arbeit zu konzentrieren oder sich auf Ihre Prioritäten zu fokussieren.Diese Verantwortung könnte dazu führen, dass Sie sich ständi…
Ich habe starke Angst davor, dass etwas passieren könnte und kann mich nicht beruhigen	Es tut mir leid zu hören, dass Sie sich unsicher fühlen und Schwierigkeiten haben, sich zu beruhigen. Es gibt einige Dinge, die Sie tun können, um Ihre Angst zu lindern:1. Achten Sie darauf, gesund zu leben. Essen Sie gesunde Mahlzeiten, genießen Sie ausreichend Schlaf und machen Sie regelmäßige körperliche Aktivität.2. Üben Sie Entspannungsübungen oder Meditationen. Entspannung kann dazu beitrag…
Ich habe das Gefühl, dass ich in einem Zustand der Verwirrung war und nicht wusste, was ich will und was ich tun sollte, was mich sehr stört und manchmal bei mir negative Gefühle hervorruft.	Es tut mir leid zu hören, dass Sie in einem Zustand der Verwirrung sind und sich unsicher sind, was Sie will und tun wollen. Es kann schwierig sein, sich aus dieser Situation zu befreien und sich auf einen klaren Kurs zu setzen.Eine Möglichkeit, um sich aus dieser Situation zu befreien, ist es, sich auf Ihre Werte und Prioritäten zu konzentrieren. Was sind die wichtigsten Dinge für Sie? Was ist w…
Fühle mich gelegentlich niedergeschlagen und es ist schwierig, aus negativen Emotionen herauszukommen. Wie kann ich meine Mentalität anpassen?	Es tut mir leid zu hören, dass Sie sich gelegentlich von niedergeschlagen fühlen und Schwierigkeiten haben, aus negativen Emotionen herauszukommen. Es gibt einige Dinge, die Sie tun können, um Ihre Mentalität anzupassen:1. Holen Sie sich Unterstützung. Geben Sie sich Zeit, um mit einem Freund, Familie oder einem Therapeuten zu sprechen. Wenn Sie sich unsicher fühlen oder negative Emotionen erlebe…
Ich habe immer das Gefühl, dass ich nicht gut genug, nicht klug genug, nicht schön genug bin, und ich möchte mich oft perfekt verpacken, um zu verhindern, dass andere meine Mängel sehen	Das klingt nach einer sehr verständlichen und gängigen Gedanke. Es ist jedoch wichtig zu verstehen, dass es keine perfekte Person gibt und dass jeder Mensch seine eigenen Stärken und Schwächen hat. Wenn Sie sich oft perfekt verpacken, um andere Menschen Ihre "Mängel" zu verbergen, können Sie Ihre Energie damit verschwenden, die eigentlich auf Ihre Stärken und Erfolge ausgerichtet sein sollte. Es …
Oft fühle ich mich innerlich leer, es fehlt mir das Gefühl der Zugehörigkeit und des Sinns	Das klingt sehr einfachmöglich, aber es gibt einige Dinge, die Sie tun können, um das Gefühl der Zugehörigkeit und des Sinnes in Ihrem Leben zu finden:1. Entdeckt die Interessen und Hobbys, die Ihnen Freude bereiten: Investiere Zeit in die Entdeckung von Dingen, die Sie interessieren, und setze diese Interessen in die Praxis um. Dies kann Ihnen ein Gefühl der Zugehörigkeit und des Sinnes geben.2.…
Immer wenn jemand mit mir spricht oder mich lobt, habe ich das Gefühl, dass sie mich nur täuschen wollen, weil ich es nicht wert bin, respektiert zu werden.	Das kann ein sehr schlechtes Gefühl sein, das Sie quälen kann. Es ist wichtig zu verstehen, dass jeder Mensch einzigartig und wertvoll ist und dass es viele Gründe gibt, warum Menschen begrenzten Wertschätzen können.Es gibt jedoch einige Dinge, die Sie tun können, um das Gefühl zu reduzieren, das Sie bewusst täuscht werden wollen:1. Achte darauf, dass Sie Ihre eigenen Werte und Erfolge feiern und…
Ich habe Angst, dass ich von anderen kritisiert und abgelehnt werde, was zu einem immer geringeren Selbstvertrauen führen wird. Wie kann ich mein Selbstvertrauen verbessern?	Es ist verständlich, dass Sie sich Sorgen um Ihr Selbstvertrauen machen, wenn Sie sich vor der Kritik und Abwertung anderer verstecken. Es gibt jedoch einige Dinge, die Sie tun können, um Ihr Selbstvertrauen zu stärken:1. Achte darauf, dass Sie Ihre eigenen Werte und Erfolge feiern und Ihre eigenen Erfolge anerkennen.2. Achte darauf, dass Sie sich selbst respektieren und in der Lage sind, Ihre ei…
Ich weiß nicht, wie ich mit meinen Emotionen umgehen soll. Ich explodiere oft wegen Kleinigkeiten. Ich habe das Gefühl, dass ich meine Emotionen nicht kontrollieren kann. Bedeutet das, dass ich ein psychisches Problem habe?	Es ist möglich, dass Ihre Schwierigkeiten mit der Kontrolle Ihrer Emotionen ein Anzeichen für ein psychisches Problem sind. Es ist wichtig, dass Sie sich von einem qualifizierten Therapeuten oder Arzt beraten lassen, um eine genaue Diagnose zu erhalten und weitere Schritte zu planen.In der Zwischenzeit können Sie versuchen, einige strategien zu entwickeln, um Ihre Emotionen zu bewältigen:1. Atmen…
Ich bin voller Angst und Unsicherheit über die Zukunft, ich weiß nicht, welchen Weg ich gehen soll, ich fühle mich jeden Tag sehr verloren	Es ist normal, sich Sorgen über die Zukunft und unsicher zu sein, insbesondere in ungewissheitvollen Zeiten. Es kann helfen, einige Schritte zu unternehmen, um Ihre Unsicherheit zu reduzieren und Ihre Zukunft zu planen:1. Schreiben Sie Ihre Ziele auf: Schreiben Sie Ihre langfristigen Ziele auf und entwickeln Sie eine Strategie, um diese Ziele zu erreichen.2. Überlegen Sie sich die Möglichkeiten: …
Ich leide schon seit jeher unter einer Zwangsstörung. Ich muss oft immer wieder kontrollieren, ob Türen und Fenster geschlossen sind, ob Elektrogeräte ausgeschaltet sind usw. Wenn diese Anforderungen nicht erfüllt werden können, fühle ich mich sehr verunsichert und verängstigt . Wie man dieses Problem beseitigt.	Es ist zu viel, um alle Details zu erläutern, aber ich werde Ihnen einige Schritte geben, die Ihnen helfen können, mit Ihrer Zwangsstörung umzugehen:1. Informieren Sie sich: Informieren Sie sich über Zwangsstörungen und lernen Sie, wie man damit umgeht.2. Suchen Sie Hilfe: Suchen Sie professionelle Hilfe, indem Sie einen Therapeuten oder Arzt aufsuchen.3. Entspannen Sie sich: Versuchen Sie, sich …
Manchmal fühle ich mich gelangweilt, ich weiß nicht, was ich tun soll, und ich weiß nicht, was die Zukunft für mich bereithält, und ich fühle mich leer.	Es ist normal, sich von Zeit zu Zeit von der Routine zu entfernen und etwas Neues zu erleben, um Energie und Inspiration zu erhalten. Wenn Sie jedoch fühle, dass Sie sich oft gelangweilt fühlen und nicht weiß, was Sie tun sollen, könnte es helfen, sich mehr mit sich selbst und Ihren Gefühlen auseinanderzusetzen. Gedanken sind flüchtige und unkontrollierbare Dinge, daher ist es wichtig, dass Sie s…
Ich wollte schon immer ein Baby haben, aber als ich schwanger war, hatte ich immer das Gefühl, dass ich nicht in der Lage wäre, eine gute Mutter zu sein	Das ist eine sehr häufige Überzeugung, aber es ist auch wichtig zu verstehen, dass jeder Mensch eine einzigartige Vorstellung davon hat, was eine gute Mutter oder Vater sein sollte. Es ist wichtig, sich selbst Zeit und Raum zu geben, um sich mit der Situation auseinanderzusetzen und sich mit der Idee eines Kindes vertraut zu machen. Es kann auch hilfreich sein, sich mit anderen Eltern und Experte…
Ich machte mir immer Sorgen um meinen Körper und meine Gesundheit und befürchtete, dass ich verschiedene Krankheiten bekommen könnte, was mich sehr nervös und ängstlich machte.	Es ist ganz normal, sich Sorgen um den eigenen Körper und die eigene Gesundheit zu machen. Aber es ist auch wichtig, sich bewusst zu machen, dass es viele Möglichkeiten gibt, um sich zu bewahren und gesund zu bleiben. Das kann durch regelmäßige körperliche Aktivität, gesunde Ernährung und genügend Schlaf erfolgen. Es kann auch hilfreich sein, sich mit einem Arzt oder einer Krankenschwester zu tre…
Ich bin sehr selbstbewusst und wählerisch, was mein Aussehen und meine Figur angeht, und bin oft in einer Art endloser Selbstkorrektur und Veränderung gefangen	Es ist in Ordnung, sich selbstbewusst und wählerisch zu sein, aber es ist auch wichtig, sich bewusst zu machen, dass das Verlangen nach Perfektion und ständiger Veränderung möglicherweise zu einer unerlaubten Belastung führen kann. Es ist wichtig, sich Zeit und Raum zu geben, um sich mit der eigenen Schönheit und Figur vertraut zu machen und sich nicht zu sehr auf die Meinung anderer zu verlassen…
Lernbehinderungen kommen häufig vor und Sie können das Lernen unterhaltsamer gestalten, indem Sie es wie ein Spiel behandeln	Das ist eine falsche Information. Lernbehinderungen sind ein sehr spezifisches Syndrom und es gibt viele verschiedene Arten von Lernstörungen. Es ist wichtig, jede Person individuell zu betrachten und zu verstehen, was sie benötigt, um ihre Fähigkeiten zu verbessern. Es kann auch hilfreich sein, sich mit einem Lehrer oder einer Therapeutin zu treffen, um mehr darüber zu erfahren, wie man Lernstör…
Natürlich möchte ich jemanden haben, auf den ich mich verlassen kann, aber ich weiß nicht, wie ich das angehen soll. Jedes Mal, wenn ich es versuche, scheitere ich, und dann verliere ich den Mut und kehre zum ursprünglichen Punkt zurück.	Es ist verständlich, dass du das Gefühl hast, nicht weißt du, wie du das angehen sollst. Es ist jedoch wichtig zu verstehen, dass es keine einzige Möglichkeit gibt, jemanden zu finden, auf den du dich verlassen kannst. Es ist ein Prozess, den du in kleinen Schritten durchführen kannst.Eine Möglichkeit, um jemanden zu finden, auf den du dich verlassen kannst, ist es, dich auf deine Umgebung zu kon…
Ich stelle fest, dass mein Interesse und meine Begeisterung für Dinge immer geringer werden und ich mich immer weniger motiviert fühle, irgendetwas zu tun. Ist das ein psychisches Problem?	Es kann sein, dass das ein psychisches Problem ist. Es gibt viele verschiedene Ursachen für das Verlust von Interesse und Motivation, das können körperliche, psychische oder soziale Faktoren sein. Es gibt auch einige Störungen, die das Verlust von Interesse und Motivation als Symptom haben, wie zum Beispiel Depression oder Burn-out. Es ist wichtig, dass du dich von einem qualifizierten Arzt oder …
Regelmäßiger psychischer Druck beeinträchtigt unsere emotionale Stabilität und kann sich auf unsere körperliche Gesundheit auswirken. Wir sollten gute Arbeit bei der Förderung der psychischen Qualität leisten und eine Aufklärung über psychische Gesundheit durchführen	Es ist wichtig, dass wir uns bewusst sind, dass der psychische Druck unsere emotionale und körperliche Gesundheit beeinträchtigen kann. Es ist wichtig, dass wir gute Arbeit leisten, um die psychische Qualität zu fördern und eine Aufklärung über die psychische Gesundheit durchzuführen. Es gibt viele Möglichkeiten, den psychischen Druck zu reduzieren, wie zum Beispiel regelmäßige Bewegung, gesunde …
Ich wurde eine Nacht lang widerrechtlich eingesperrt, bis zur Schwäche gefoltert, weinte allein in einer Ecke, nur Tränen erhellten die Dunkelheit	Es ist verständlich, dass das Leid, das du erlebt hast, einen schweren Einfluss auf deine emotionalen und körperlichen Gesundheit haben kann. Es ist wichtig, dass du sicherstellen kannst, dass du die Unterstützung findest, die du brauchst, um durch diese schwierige Zeit zu kommen. Es kann hilfreich sein, sich professionelle Hilfe anzunehmen, um deine Gefühle zu verarbeiten und einen Plan zu entwi…
Im Hinblick auf die psychische Gesundheit von Jugendlichen ist es sehr wichtig zu lernen, wie man eine gesunde Beziehung aufbaut und wie man seine Gefühle und Ansprüche richtig ausdrückt	Ja, das ist absolut richtig. Eine gesunde Beziehung zu einem Partner ist in vielen Fällen ein wichtiger Faktor für die psychische Gesundheit und das Wohlbefinden von Jugendlichen. Einerseits kann eine positive Beziehung dazu beitragen, dass Jugendliche in der Lage sind, positive Gefühle und Emotionen wie Dankbarkeit, Zufriedenheit und Liebe auszudrücken und zu empfinden. Andererseits kann eine ne…
Ich habe in letzter Zeit häufig Albträume, und diese Träume machen mir Angst und Unbehagen und beeinträchtigen sogar meine Schlafqualität und mein tägliches Leben.	Es ist normal, Albträume zu haben, und in einigen Fällen können sie auch ein Indikator für psychische Störungen sein. Wenn Ihre Albträume Ihnen jedoch in anderen Aspekten Ihres Lebens Beeinträchtigungen bereiten, kann es ratsam sein, professionelle Hilfe in Anspruch zu nehmen.Es gibt verschiedene Gründe, warum Menschen Albträume haben, und es kann hilfreich sein, diese Gründe zu identifizieren, u…
Ich bin immer ängstlich und sorge mich ständig darüber, wie die Dinge laufen, vor allem kleine Dinge können auch dazu führen, dass ich mich unwohl und unwohl fühle	Es ist normal, sich Sorgen und Bedenken zu machen, insbesondere in ungewiss Situationen oder unter Druck. Aber wenn diese Ängste die Qualität Ihres Lebens beeinträchtigen und Ihre Umgebung beeinflussen, kann es hilfreich sein, professionelle Hilfe in Anspruch zu nehmen.Es gibt verschiedene Gründe, warum jemand ängstlich wird, und es kann hilfreich sein, diese Gründe zu identifizieren, um ein Vers…
Ich kann meine negativen Gedanken nicht unterdrücken, manchmal denke ich immer noch an das Schlimmste, selbst wenn die Dinge nicht so schlimm sind. Ich fühle mich so deprimiert und hilflos, ich habe das Gefühl, dass ich dieses Gefühl niemals loswerden kann.	Es ist normal, dass manchmal negative Gedanken auftauchen und man diese Gedanken nicht sofort unterdrücken kann. Aber wenn diese Gedanken die Qualität Ihres Lebens beeinträchtigen und Ihre Umgebung beeinflussen, kann es hilfreich sein, professionelle Hilfe in Anspruch zu nehmen.Es gibt verschiedene Gründe, warum jemand negative Gedanken hat, und es kann hilfreich sein, diese Gründe zu identifizie…
Ich habe das Gefühl, dass mein Leben langweilig ist und es mir an Leidenschaft und Motivation mangelt, wodurch ich mich deprimiert und verloren fühle	Es tut mir leid zu hören, dass du das Gefühl hast, dass dein Leben langweilig ist und dass du an Leidenschaft und Motivation mangelt. Es ist wichtig, dass du wirst, aber es ist auch wichtig, dass du weißt, dass du nicht allein durchkämpfen musst.Eine Möglichkeit, um das Gefühl von Langweiligkeit zu überwinden, ist es, dich auf neue und interessante Dinge zu konzentrieren. Wenn du keine Ahnung has…
Ich leide häufig unter Schlaflosigkeit. Nachts liege ich im Bett und denke an Arbeit, familiäre Angelegenheiten und zwischenmenschliche Beziehungen, wodurch ich tagsüber nicht fokussiert bin und meine Arbeitsleistung beeinträchtigt ist. Meine Stimmung ist ebenfalls sehr schlecht.	Es tut mir leid zu hören, dass du schlafstlos viel bist und dass dies deine Arbeitsleistung beeinträchtigt und deine Stimmung verschlechtert. Schlaflose Nächte können dazu führen, dass du möglicherweise übermäßig stresserad und dass es schwieriger für dich ist, sich auf deine Arbeit zu konzentrieren oder auf deine familiären Angelegenheiten und zwischenmenschlichen Beziehungen.Ein paar Tipps, um …
Wenn ich Rückschläge und Enttäuschungen erlebe, denke ich, dass der einzige Weg, auf Nummer sicher zu gehen, darin besteht, alles zu vergessen.	Es tut mir leid zu hören, dass du das Gefühl hast, dass du alles vergessen solltest, wenn du Rückschläge und Enttäuschungen erlebst. Es ist jedoch wichtig zu verstehen, dass das Vergessen deiner Erfahrungen und Erfolge nicht die Lösung für deine Probleme ist und dass es besser ist, darüber nachzudenken und darüber nachzudenken, was du tun kannst, um deine Herausforderungen zu meistern.Ein paar Ti…
Ich fühle mich oft müde und kraftlos, auch wenn ich keine körperliche Arbeit geleistet habe. Ich habe auch häufig Schlafstörungen und kann nicht einschlafen, was mich sehr unwohl und belastet fühlen lässt.	Es klingt, als ob Sie unter Stress und emotionalen Belastungen leiden, was sich möglicherweise auf Ihre körperliche Gesundheit auswirken kann. Die Müdigkeit und die Schwierigkeiten, schlafen zu können, können Anzeichen für eine bestehende Belastungsstörung sein. Es wäre ratsam, sich an einen Arzt oder eine Psychologin zu wenden, um die Ursachen Ihrer Schwierigkeiten zu erkunden. Möglicherweise gi…
Ich leide manchmal unter Depressionen, kann nicht normal essen und kontrolliere dann mein Essen, weil ich Angst habe, dass die Leute sehen, dass ich dünner werde	Es ist verständlich, dass du dich bei dieser Situation unsicher fühlst. Essstörungen können schwierig zu überwinden sein, aber es gibt Hilfe und Unterstützung, die du erhalten kannst. Hier sind einige Schritte, die du unternehmen kannst, um deine Depressionen und Essstörungen zu bewältigen:1. Suche professionelle Hilfe: Essstörungen können schwerwiegender sein als das ahnen, und es ist wichtig, d…
Meine Eltern kritisieren mich ständig und egal, was ich tue, ist nicht gut genug, es macht mich sehr deprimiert und enttäuscht, ich habe das Gefühl, dass ich nie in der Lage sein werde, ihre Zustimmung und ihr Lob zu bekommen	Es ist verständlich, dass du von deinen Eltern kritisiert wirst, wenn du ein Kind bist, aber es ist auch wichtig, dass du weißt, dass ihre Kritik nicht dein Wert als Person beeinflussen sollte. Es ist wichtig, dass du weißt, dass du deine eigenen Werte und Prioritäten hast und dass du dich nicht von der Meinung deiner Eltern beeinflussen lassen solltest.Es kann hilfreich sein, wenn du mit deiner …
Meine Beziehung war schon immer sehr instabil, ich werde immer von Emotionen kontrolliert und bin nicht in der Lage, meine Beziehung auf gesunde Weise aufrechtzuerhalten	Es ist verständlich, dass eine instabile Beziehung zu einem großen Stressfaktor werden kann. Es ist wichtig, dass du darüber sprechen kannst, wie die instabile Beziehung deinen Alltag beeinflusst und welche Auswirkungen es auf dich hat. Es ist auch wichtig, dass du versuchst, in der Lage zu sein, deine Beziehungsprobleme anzugehen und gemeinsam mit deinem Partner Lösungen zu finden.Es kann hilfre…
Xiaoling wurde im College gemobbt, wodurch sie minderwertig und depressiv wurde. Wie kann ich ihr helfen, ihr Selbstvertrauen und ihre geistige Gesundheit wiederzugewinnen?	Es ist wirklich traurig zu hören, dass Xiaoling gemobbt wurde und dadurch ihre Selbstwertschätzung und ihr Selbstvertrauen verloren hat. Es ist wichtig, dass du sie unterstützt und ihr hilfst, ihre geistige Gesundheit wiederzugewinnen. Hier sind einige Schritte, die du unternehmen kannst, um Xiaoling zu unterstützen:1. Sei eine gute Freundin: Bleibe bei Xiaoling und unterstütze sie dabei, ihre Ge…
Meine familiären Beziehungen waren kompliziert und ich war oft gestresst und unsicher und wusste nicht, wie ich damit umgehen sollte oder an wen ich mich um Hilfe wenden sollte.	Es ist verständlich, dass familiäre Beziehungen kompliziert sein können und dass manchmal Hilfe benötigt wird, um damit umzugehen. Es ist wichtig, dass man weiß, an wen man sich wenden kann, um Unterstützung zu erhalten. Wenn Sie unsicher sind, wie Sie mit Ihren familiären Beziehungen umgehen sollen, können Sie darüber nachdenken, wie Ihre Familie dazu beitragen kann, dass Sie sich sicherer und s…
Ich habe einen Freund, der sich immer negativ beschwert und zu nichts eine positive Einstellung hat. Ich glaube, seine Negativität beeinflusst meine Gefühle, aber ich weiß nicht, wie ich mit ihm kommunizieren soll	Es kann schwierig sein, mit einer Person zu kommunizieren, die ständig negativ ist. Es ist wichtig, dass Sie sich selbst schützen und nicht von der negativen Einstellung der anderen Person beeinflusst werden. Es kann helfen, eine positive Einstellung zu haben und sich auf die Dinge zu konzentrieren, die gut gehen, anstatt sich auf die negativen Aspekte zu konzentrieren. Es kann auch helfen, eine …
In letzter Zeit habe ich festgestellt, dass ich immer wieder unter Schlaflosigkeit leide. Selbst wenn ich einschlafe, habe ich Albträume und fühle mich nach dem Aufwachen sehr belastet. Was kann ich tun?	Schlaflosigkeit kann eine belastende Erfahrung sein und Albträume können dazu führen, dass man sich gestresst fühlt und dass die Qualität des Schlafes beeinträchtigt wird. Es gibt einige Dinge, die Sie tun können, um Ihre Schlafqualität zu verbessern und Ihre Schlaflosigkeit zu reduzieren. Hier sind ein paar Tipps:1. Schafft eine regelmäßige Schlaf- und Aufwach-Routine: Ein regelmäßiges Schlaf- u…
Wenn ich mit Freunden chatte, habe ich manchmal immer das Gefühl, dass das Gespräch beendet ist und es nichts zu sagen gibt	Es kann schwierig sein, ein Gespräch zu führen, wenn man das Gefühl hat, dass es beendet ist und dass es nichts mehr zu sagen gibt. Es kann helfen, die Konversation auf positive und unterhaltsame Themen zu konzentrieren und sich auf das zu konzentrieren, was sich gut anfühlt und das man interessant findet. Es kann auch hilfreich sein, sich auf das zu konzentrieren, was man sich vorstellt und das …
Mein Kind wird in der Schule gemobbt und ist jetzt sehr zurückgezogen und ich weiß nicht, wie ich ihm helfen kann	Es tut mir sehr leid zu hören, dass dein Kind in der Schule gemobbt wird und sich dadurch zurückgezogen hat. Dies kann ein sehr schwieriger und traumatischer Prozess sein für das Kind, und es ist wichtig, dass du es unterstützt und hilfst, um das Problem anzugehen.Hier sind einige Schritte, die du berücksichtigen kannst, um deinem Kind zu helfen:1. Höre auf das Kind und höre zu, was es sagt. Es i…
Wenn ich mit Menschen kommuniziere, bin ich immer sehr nervös. Ich weiß nicht, was ich sagen soll, und ich habe Angst, dass ich das Falsche sage.	Es ist normal, nervös zu sein, wenn man mit anderen Menschen kommuniziert. Es gibt jedoch einige Möglichkeiten, um dieses Gefühl zu reduzieren und sich besser auszudrücken:1. Überwende die Angst, indem du dich langsam auf ein Thema konzentrierst und dich auf das Konto stellst. Wenn du dich auf eine bestimmte Person konzentrierst, kann es dir helfen, dich besser zu fokussieren und deine Gedanken b…
Immer wenn ich allein bin, verspüre ich ein unerklärliches Angstgefühl, das unwissentlich von einer unsichtbaren Kraft kontrolliert wird. Ich habe das Gefühl, gefangen zu sein, gefangen in einer undurchdringlichen Hülle, manchmal wird mir alles furchtbar unheimlich	Es kann für einige Menschen schwierig sein, sich bei Licht und allein zu fühlen, insbesondere wenn sie das Gefühl haben, von einer unsichtbaren Kraft kontrolliert zu werden. Diese Art von Angstgefühl kann sehr überwältigend sein und es ist wichtig, dass du wissentlich handelst, um deine Angst zu reduzieren. Hier sind einige Schritte, die du berücksichtigen kannst:1. Lass dich von der Umgebung umg…
Ich war immer zu hart zu mir selbst und hatte das Gefühl, nicht gut genug zu sein, um geliebt und geschätzt zu werden	Es ist verständlich, dass Sie diese Gefühle haben, wenn Sie ein Kind von einem Elternpaar erzogen wurden, das emotional und physisch Misshandlung verübt hat. Es ist schwer, diese Art von Erfahrungen aus der Vergangenheit zu verarbeiten und zu überwinden. Es ist jedoch wichtig, dass Sie wissen, dass diese Erfahrungen nicht Ihr Charakter oder Wert als Person beeinflussen. Es gibt professionelle Res…
Mein Leben ist nur eine ständige Frustration, ich versage, egal was ich tue, ich fühle mich wertlos	Es ist verständlich, dass Sie sich so fühlen, wenn Sie sich innerlich als Versager und wertlos einschätzen. Es gibt jedoch einige Dinge, die Sie tun können, um sich besser zu fühlen und Ihre inneren Selbstwertgefühle zu verbessern.Zunächst einmal ist es wichtig, dass Sie sich Zeit nehmen, um Ihre Gedanken und Gefühle zu verarbeiten und sich zu entspannen. Es kann hilfreich sein, regelmäßig etwas …
Ich wurde immer gemobbt, auf mich herabgeschaut, fühlte mich nutzlos, inkompetent, unfähig, in sozialen Situationen meine wahre Stärke und mein Können zu zeigen, und versteckte mich immer in der Ecke	Es tut mir leid zu hören, dass Sie in der Vergangenheit soziale Schwierigkeiten und negative Erfahrungen gemacht haben. Es ist verständlich, dass dies Ihren Selbstwertgefühlen und Ihren Selbstvertrauen geschadet hat.Es gibt jedoch einige Dinge, die Sie tun können, um sich besser zu fühlen und Ihre inneren Selbstwertgefühle zu verbessern. Dazu können Dinge wie die Teilnahme an Selbstvertrauen- ode…
Ich fühle mich verwirrt und hilflos, was die Zukunft angeht, ich weiß nicht, was ich tun soll und ich weiß nicht, was ich will.	Es tut mir leid zu hören, dass Sie derzeit unsicher und verwirrt sind über Ihre Zukunft. Es ist normal, sich Sorgen und Unsicherheiten auszumisten, insbesondere wenn es um die Zukunft geht.Eine Möglichkeit, um sich besser zu fühlen und Ihre Zukunftspläne zu entwickeln, besteht darin, Ihre Zukunftspläne aufzuschreiben. Dies kann Ihnen dabei helfen, Ihre Ziele und Wünsche besser zu verstehen und Ih…
Ich weiß nicht, warum ich immer zu viel nachdenke, mir Sorgen um die Zukunft mache und jedes Mal, wenn ich rausgehe, noch einmal kontrollieren muss, ob ich die Tür verschließe und die Fenster schließe, was mich sehr müde und gereizt macht	Es tut mir leid zu hören, dass Sie sich oft überfordert und überfordert fühlen, wenn es um Ihre Sicherheit geht. Es ist normal, sich Sorgen und Unsicherheiten auszumistieren und zu überprüfen, ob alle Sicherheitsvorkehrungen getroffen sind, insbesondere wenn es um Ihre persönliche Sicherheit geht.Es gibt jedoch einige Dinge, die Sie tun können, um sich zu entspannen und Ihre Überwachungsgedanken …
Ich wurde schon lange sexuell missbraucht, fühle aber immer noch Schmerz und Kummer. Wie kann ich mit diesem vergangenen Schmerz umgehen?	Es ist sehr anstrengend und schwierig, mit einem vergangenen Missbrauch umzugehen, aber es ist möglich. Es kann helfen, professionelle Hilfe zu suchen, wie zum Beispiel einen Therapeuten oder eine Gruppenarbeit. Es ist auch wichtig, dass man sich Zeit schenkt, um sich an die Vergangenheit zu erinnern und sich auf die Gedanken und Gefühle vorzubereiten, die damit verbunden sein können. Es ist auch…
Ich hatte das Gefühl, dass mein Leben keinen Sinn und Zweck hatte, dass ich nicht finden konnte, was ich wirklich tun wollte, und dieses Gefühl des Verlorenseins war sehr schmerzhaft.	Es ist verständlich, dass das Gefühl des Verlorenseins schmerzhaft sein kann. Es kann hilfreich sein, sich Zeit zu nehmen, um über das Gefühl zu reflektieren und herauszufinden, warum es so ist. Es kann auch hilfreich sein, sich Gedanken an Ziele und Wertvorstellungen zu machen, die man sich wünscht und dann zu überlegen, wie man diese Ziele und Wertvorstellungen erreichen kann. Es kann auch hilf…
Eines Tages fand ich einen Weg, meiner realen Welt zu entfliehen, indem ich meinen Kopf auf das Sofa legte, meine Ohren zusteckte und nicht auf die Außengeräusche hörte, so dass ich ganz in eine Welt eintauchen konnte, in der nur ich selbst war. In dieser Welt werden alle Probleme verschwinden.	Es ist verständlich, dass du dich in einer Welt verlieren könntest, in der alle Probleme verschwinden. Es ist jedoch wichtig zu beachten, dass diese Welt nur eine Illusion ist und dass die Probleme immer noch vorhanden sind. Es ist auch wichtig zu beachten, dass es nicht das Ziel sein sollte, immer in dieser Welt zu leben und von den realen Problemen abzuschweifen. Es kann hilfreich sein, profess…
Ich fühle mich oft allein und hilflos, habe das Gefühl, von niemandem verstanden oder unterstützt zu werden, selbst wenn Menschen um mich herum sind, ich fühle mich getrennt und entfremdet, diese Emotion macht mich sehr deprimiert und negativ und führt manchmal zu Angstzuständen und depressiven Symptomen	Es ist verständlich, dass das Gefühl der Einsamkeit und Hilflosigkeit schwer zu ertragen sein kann. Es kann hilfreich sein, sich Zeit zu nehmen, um über diese Gefühle zu reflektieren und herauszufinden, warum sie so sind. Es kann auch hilfreich sein, sich auf die eigene Emotion und auf die eigenen Bedürfnisse zu konzentrieren und sich nicht von der Umgebung beeinflussen zu lassen. Es kann auch hi…
Ein Wort von dir kann mir das Herz brechen	Das ist ein sehr berührendes und tiefes Gedicht. Es spiegelt eine tiefgreifende empathische Empörung über das Leid, das durch den Krieg verursacht wird wider, insbesondere das, was Kinder und Familien zugefügt bekommen. Es geht darum, wie der Krieg die Gesundheit, das Wohlbefinden und das Leben der Menschen zerstört, indem er sie in einen Zustand des Schocks versetzt und sie mit Schmerzen und Tra…
Ich bin äußerst unzufrieden mit meinem Aussehen und meiner Passform und habe oft ein geringes Selbstwertgefühl und Ängste	Es ist verständlich, dass Sie mit Ihrem Aussehen und Ihrer Passform unzufrieden sind, wenn Sie ein geringes Selbstwertgefühl und Ängste haben. Es ist wichtig zu verstehen, dass das Selbstvertrauen, das Sie haben, das Aussehen und die Passform, die Sie haben, beeinflussen. Es kann helfen, sich selbst zu motivieren und zu begreifen, dass das, was Sie sind, wertvoll und gut ist. Eine Möglichkeit, um…
Ich weiß wirklich nicht, was ich tue. Ich habe immer keine Ahnung, was ich tun soll, und das macht mich frustriert.	Es ist verständlich, frustriert zu sein, wenn Sie immer keine Ahnung haben, was Sie tun sollen. Es kann hilfreich sein, Ihre Prioritäten zu klären und sich auf die wichtigsten Dinge zu konzentrieren, die Sie erreichen möchten. Es kann auch hilfreich sein, sich Zeit zu nehmen, um Ihre Gedanken und Gefühle zu organisieren und eine Liste zu erstellen, die Ihnen helfen kann, Ihre Ziele zu erreichen. …
Ich habe große soziale Ängste, ich traue mich nicht, mit Fremden zu kommunizieren und ich mag es nicht, an überfüllten Orten aufzutauchen. Ich hoffe, dass ich diese Ängste überwinden kann	Es ist verständlich, dass Sie große soziale Ängste haben, wenn Sie mit Fremden nicht kommunizieren und an überfüllten Orten nicht gedeihen möchten. Es gibt jedoch viele Möglichkeiten, um Ihre sozialen Ängste zu überwinden. Eine Möglichkeit ist es, sich gezielt an Orten zu bewegen, die für Sie angenehm sind, und sich mit Menschen zu vermischen, die Ihnen helfen können, Ihre sozialen Ängste zu über…
Psychologen glauben, dass extreme Depressionen die körperliche und geistige Gesundheit einer Person beeinträchtigen können	Das stimmt. Extreme Depressionen können sowohl körperliche als auch geistige Auswirkungen auf eine Person haben.Körperliche Auswirkungen können sein:* Müdigkeit und Schlafstörungen* Veränderungen im Hunger- und Durstgefühl* Schwächung des Immunsystems, was zu einer höheren Anfälligkeit für Krankheiten ist* Muskelverspannungen und Schmerzen* Schwindel oder GleichgewichtsstörungenGeistige Auswirkun…
Immer wenn ich anfange, ein Ziel zu verfolgen, fühle ich mich machtlos, und wenn ich versuche, etwas zu ändern, habe ich das Gefühl, dass mir der Mut fehlt	Es kann normal sein, wenn man sich beim Versuch, ein Ziel zu verfolgen oder etwas zu ändern, mächtig oder mutig zu fühlen, eine gewisse Hürde zu haben. Es ist wichtig, sich darüber im Klaren zu sein, dass Veränderungen und Zielsetzungen möglicherweise mit Schwierigkeiten verbunden sind und dass man sich Zeit und Ermutigung geben sollte. Es kann auch helfen, sich an Erfolge anzuschließen, die man …
Ich leide oft unter Schlaflosigkeit und Konzentrationsschwierigkeiten bei der Arbeit, weil ich mir Sorgen mache, dass ich die Arbeit, die ich mache, nicht schaffen werde	Es ist normal, wenn man sich Sorgen macht, dass man die Arbeit nicht schaffen wird, aber es kann auch dazu führen, dass man sich schlaflos fühlt und Schwierigkeiten beim Konzentrationsvermögen hat. Es gibt einige Dinge, die man tun kann, um sich vorzubereiten und sich zu beruhigen:1. Sich auf die Aufgaben und die Aufgabenplanung konzentrieren, anstatt sich auf die möglichen Herausforderungen und …
Es schmerzt mich mehr denn je, wenn meine Familie meine Hilfe ablehnt	Es ist normal, dass man sich schmerzen fühlt, wenn man sich von Familienmitgliedern abgelehnt fühlt. Es kann schwierig und verletzlich sein, wenn man sich von jemandem, der dich liebt und achtet, abgelehnt fühlt. Es ist wichtig zu verstehen, dass es normal ist, dass Menschen unterschiedliche Meinungen und Ansichten haben und dass es manchmal nicht möglich ist, alles zu besprechen oder zu verstehe…
Ich fühle mich jedes Mal deprimiert, wenn ich auf Schwierigkeiten stoße	Das ist normal und typisch für die Anfangsphase eines Projekts oder einer Aufgabe. Wenn Sie auf Schwierigkeiten stoßen, empfinden viele Menschen eine innere Spannung und Depression. Es ist wichtig, dass Sie sich nicht allein hindeuten und sich Zeit nehmen, um sich auf die Herausforderungen zu konzentrieren. Es kann hilfreich sein, sich Zeit zu nehmen, um sich die Probleme anzusehen und sie zu lös…
Ich fühle mich oft deprimiert und hilflos, habe das Gefühl, dass es meinem Leben an Sinn und Wert mangelt, und denke manchmal an Selbstmord, aber ich habe Angst, es irgendjemandem zu erzählen, weil ich befürchte, dass sie denken, ich sei ein schwacher Mensch und ein Versager.	Es ist verständlich, dass Sie sich so fühlen und dass es schwer für Sie ist, über diese Gefühle hinwegzukommen. Selbstmordgedanken sind ein ernstes Problem und müssen ernst genommen werden. Es ist wichtig, dass Sie wissen, dass es viele Menschen gibt, die ähnliche Gefühle haben und dass es Hilfe gibt, um diese Gefühle zu lindern.Es kann hilfreich sein, professionelle Hilfe in Anspruch zu nehmen, …
Ich habe einen Freund, der immer das Gefühl hat, er sei nicht gut genug, nicht klug genug, nicht talentiert genug oder nicht einmal wert, dass er sich um ihn kümmert, was mir Sorgen um seine geistige Gesundheit macht.	Es ist verständlich, dass Sie sich Sorgen machen und dass Sie sich um Ihren Freund kümmern möchten, wenn er sich wie dieser ausführt. Es kann jedoch sein, dass diese Gedanken und Gefühle für Ihren Freund eine negative Auswirkung haben und seine geistige Gesundheit beeinträchtigen.Es kann hilfreich sein, Ihren Freund zuzuhören und ihm zuzuhören, wenn er diese Gedanken und Gefühle hat. Es kann auch…
Ich leide oft unter dem Druck der Arbeit und den Familienkonflikten und fühle mich dadurch gedrückt und verzweifelt. Wie kann ich diese Emotionen lindern und meine psychologische Gesundheit aufrechterhalten?	Es ist verständlich, dass Sie sich unter dem Druck der Arbeit und den Familienkonflikten fühlen und dass Sie sich gedrückt und verzweifelt fühlen. Es ist wichtig, dass Sie wissen, dass es immer wieder Möglichkeiten gibt, um sich zu entspannen und die Druck aufzubauen.Es kann hilfreich sein, sich Zeit für Dinge zu nehmen, die Sie gerne machen, wie zum Beispiel Freizeitaktivitäten oder Hobby. Es ka…
In letzter Zeit geraten meine Gedanken zunehmend durcheinander und ich mache mir Sorgen um meine geistige Gesundheit, und das macht mir Angst	Ich verstehe, dass es für dich schwierig sein kann, deine Gedanken zu ordnen und sich sicher zu fühlen. Es ist wichtig zu wissen, dass es normal und auch häufig ist, sich Gedanken zu machen und sich Sorgen zu machen. Es kann jedoch auch hilfreich sein, geeignete Techniken und Verhaltensweisen zu entwickeln, um deine Gedanken besser zu organisieren und besser zu regeln, damit sie weniger einschüch…
Ich traue mich nicht, anderen gegenüberzutreten, ich habe immer das Gefühl, dass ich nicht gut genug bin, ich bin nervös, selbst wenn meine Freunde mit mir reden, werde ich mir weiterhin Sorgen darüber machen, was sie denken	Es ist normal, sich Sorgen und Bedenken zu machen, wenn man vor anderen steht oder spielt. Es kann auch normal sein, zu denken, dass man nicht gut genug ist oder dass man sich nicht wohl fühlt. Es ist jedoch auch wichtig zu verstehen, dass diese Gedanken und Bedenken normalerweise nichts mit der Wahrnehmung der anderen Personen zu tun haben.Es gibt verschiedene Techniken und Verhaltensweisen, die…
Ich mache mir Sorgen, dass ich meine geistige Gesundheit nicht aufrechterhalten kann und meine Familie im Stich lasse	Es ist normal, sich Sorgen und Bedenken zu machen, insbesondere wenn es um die eigene geistige Gesundheit geht. Es ist jedoch auch wichtig zu verstehen, dass es viele Möglichkeiten gibt, um sich geistig zu verhindern und die Familie nicht im Stich zu lassen.Eine Möglichkeit, um sich geistig zu erhalten, ist das "positive Self-Talk" übersetzen auf Deutsch. Hierbei geht es darum, sich selbst positi…
Ich fühle mich oft allein und hilflos, selbst wenn ich von Menschen umgeben bin, habe ich das Gefühl, dass niemand meine innere Welt versteht	Es ist verständlich, dass Sie das Gefühl haben, allein und hilflos zu sein, wenn Sie eine traumatische Kindheitserfahrung haben. Es ist schwierig, solche Erfahrungen aus der Vergangenheit zu verarbeiten und zu überwinden, und es kann sich als schwierig anfühlen, diese Erfahrungen mit anderen Menschen zu teilen. Es gibt jedoch Ressourcen und Therapieformen, die Ihnen helfen können, diese Gefühle z…
Ich bin sehr verwirrt über die Zukunft, ich weiß nicht, was ich tun soll, diese Verwirrung macht mich sehr ängstlich und unruhig	Es ist normal, dass man sich über die Zukunft unsicher fühlt, da man nicht weiß, was sich ereignen wird. Es ist jedoch wichtig, dass man versucht, sich für die Zukunft zu informieren und sich mit den Möglichkeiten und Risiken auseinandersetzen. Es kann hilfreich sein, sich Gedanken über mögliche Optionen zu machen und sich dann auf eine Entscheidung zu konzentrieren, die am besten zu Ihnen passt.…
Ich war heute auf einer Party, wurde aber von allen ausgelacht und von anderen abgelehnt. Ich war kurz vor dem Zusammenbruch	Es tut mir leid zu hören, dass du auf einer Party von allen ausgelacht und abgelehnt wurdest. Es ist normal, dass man sich unsicher und Schwierigkeiten beim Umgang mit anderen hat, insbesondere wenn man sich selbst nicht wirklich leidet. Es ist jedoch wichtig, dass du dich nicht von diesen Erfahrungen einschränken lässt und stattdessen versuchst, dich auf deine Stärken zu konzentrieren und neue M…
Ich finde meine Beziehungen schwierig und es ist immer schwierig, tiefe Verbindungen zu Menschen aufzubauen. Ich hatte das Gefühl, dass ich nicht wusste, wie ich mit Menschen auskommen oder kommunizieren sollte, sodass ich schnell isoliert war. Ich sehne mich danach, echte Freunde zu haben, weiß aber nicht, wie ich sie gewinnen kann.	Es ist normal, dass man Schwierigkeiten hat, tiefe Verbindungen zu anderen Menschen aufzubauen. Es ist jedoch wichtig, dass man versucht, sich für andere zu öffnen und sich zu öffnen, um eine Verbindung zu knüpfen. Es kann auch hilfreich sein, sich mit anderen Menschen auszutauschen und gemeinsam etwas zu unternehmen, um gemeinsame Interessen zu teilen. Wenn du möchtest, kann ich dir gerne gerne …
Meine Arbeit steht unter großem Druck, ich muss jeden Tag Überstunden machen und bleibe oft lange auf. Ich habe das Gefühl, dass mein Körper und mein Geist an ihre Grenzen gestoßen sind, aber ich kann immer noch nicht aufhören. Was sollte ich tun, um das zu vermeiden? ein Zusammenbruch.	Es ist schwer, sich ständig überlastet zu fühlen und nicht zu erlahmen. Es ist wichtig, dass du dich Zeit für dich selbst nimst und deinen Körper und Geist ausruhst, um das Risiko von Zusammenbrüchen zu reduzieren. Es kann hilfreich sein, sich regelmäßig zu entspannen, sportliche Aktivitäten zu treiben, genügend Schlaf zu bekommen und eine gesunde Ernährung zu wählen. Es kann auch hilfreich sein,…
Ich habe das Gefühl, dass ich meine Gefühle nicht kontrollieren kann und verliere oft wegen Kleinigkeiten die Beherrschung, was den Menschen um mich herum Unbehagen bereitet	Es ist verständlich, dass du das Gefühl hast, dass du deine Gefühle nicht gut kontrollieren kannst. Es ist jedoch wichtig zu verstehen, dass es sicherlich möglicherweise eine Möglichkeit gibt, diese Situation zu verbessern. Ein erster Schritt wäre, dich mit deinen Gefühlen und Gedanken auseinanderzusetzen und zu entdecken, warum du Schwierigkeiten hast, deine Gefühle zu kontrollieren.Es kann auch…
In meiner Familie gab es keine Liebe, keine warmen Worte, kein wirkliches Gefühl der Sicherheit, nur Vorwürfe und Druck auf mir, sodass ich introvertierter wurde und mit niemandem zu tun haben wollte.	Es ist wirklich schwer, solch ein Herausforderung zu erleben. Es ist wichtig zu verstehen, dass solche Erfahrungen einen tiefen Einfluss auf deine Persönlichkeit und deinen Selbstwert haben können. Es ist jedoch auch wichtig zu erkennen, dass du in der Lage bist, deine Leben zu verändern und eine neue Richtung zu nehmen.Es kann hilfreich sein, sich Zeit zu nehmen, um über diese Erfahrungen nachzu…
Ich mache mir Sorgen um meine Zukunft, ich weiß nicht, ob ich erfolgreich sein werde, ob ich meine Träume verwirklichen kann	Es ist normal, sich Sorgen um die Zukunft zu machen und sich über die Erfüllung deiner Träume und Ziele zu beunruhigen. Es ist jedoch wichtig zu verstehen, dass es viele Möglichkeiten gibt, um deine Träume und Ziele zu verwirklichen und erfolgreich zu sein.Ein erster Schritt wäre, sich Zeit zu nehmen, um deine Träume und Ziele zu überprüfen und zu identifizieren, was dir hilft, deine Prioritäten …
Ich hatte das Gefühl, dass ich den Stress und die Herausforderungen in meinem Leben nicht bewältigen konnte, und litt oft unter schlechter Stimmung, Angstzuständen und Schlaflosigkeit.	Es ist verständlich, dass du das Gefühl hast, dass du den Stress und die Herausforderungen in deinem Leben nicht bewältigen kannst. Diese Gedanken und Gefühle können tiefgreifend und einschneidend sein, und es ist wichtig zu wissen, dass es viele Möglichkeiten gibt, um diese Gefühle zu lindern und sich sicherer und stärker zu fühlen. Eine Möglichkeit, um sich sicherer und stärker zu fühlen, ist e…
Ich fühle mich einsam und habe viele Menschen um mich herum, aber ich habe nicht immer das Gefühl, dass ich mich wirklich mit ihnen identifizieren kann. Ist das eine Beziehungsstörung?	Es ist möglich, dass diese Gefühle Teil einer Beziehungsstörung sind. Ein Mangel an Selbstidentifikation mit anderen Menschen kann ein Symptom von sozialer Angst sein, einer Störung, die eine Bemühung um soziale Interaktion und Anerkennung erschwert. Es ist jedoch wichtig zu beachten, dass viele Menschen solche Gefühle ausleben, ohne dass es eine Störung ist.Es kann hilfreich sein, sich mit einem…
Ich fühle mich sehr unwohl, was die Zukunft angeht, weiß nicht, was ich mit mir machen soll, und weiß nicht, was die Zukunft bringt	Es ist normal, dass man sich unsicher fühlen kann, wenn es um die Zukunft geht. Die Unsicherheit kann von verschiedenen Faktoren abhängen, wie z.B. persönlichen Erwartungen, sozialer Unterstützung, finanzieller Sicherheit, beruflicher Entwicklung oder persönlichen Schwächen. Es kann hilfreich sein, sich Zeit und Raum zu geben, um über diese Unsicherheit nachzudenken und ein besseres Verständnis d…
Ich habe viele Probleme in meiner Beziehung und fühle mich deprimiert und hilflos und weiß nicht, was ich tun soll	Es ist normal, dass man sich unsicher und überfordert fühlen kann, wenn es um die Beziehung geht. Die Beziehung kann viele verschiedene Aspekte beinhalten, wie z.B. emotionale Intimität, kommunikation, Unterstützung und Verantwortung. Es kann hilfreich sein, sich Zeit und Raum zu geben, um über die Probleme in der Beziehung nachzudenken und ein besseres Verständnis davon zu entwickeln, was man wi…
Ich fühle mich oft sehr müde, körperlich und geistig schwach und habe manchmal sogar Selbstmordgedanken, da ich das Gefühl habe, mein Leben sei bedeutungslos	Es ist normal, dass man sich manchmal müde, körperlich und geistig schwach fühlt und dass man Selbstmordgedanken hat. Diese Gefühle können sich aus verschiedenen Faktoren entwickeln, wie z.B. persönlichen Herausforderungen, gesundheitlichen Problemen, sozialer Isolation oder persönlichen Verlassenseins. Es ist wichtig, sich Zeit und Raum zu geben, um über diese Gefühle nachzudenken und ein besser…
Manchmal verspüre ich plötzlich extreme Angst und Panik, es fällt mir schwer, meine Emotionen und mein Verhalten zu kontrollieren, und dieser Zustand hält lange an.	Es klingt, als ob du unter Anfällen von Angst und Panik leidest. Diese Symptome können verschiedene Ursachen haben, wie zum Beispiel ein emotionales Stress oder eine psychische Störung. Es ist wichtig, dass du dich bald mit einem Arzt oder einer Psychologin besuchen lassen, um mögliche Ursachen auszuschließen und die bestmögliche Behandlung zu erhalten.In der Zwischenzeit gibt es einige Dinge, di…
Immer wenn ich vor einer neuen Herausforderung stehe, fühle ich mich so nervös und unsicher, dass ich das Gefühl habe, nicht damit klarzukommen	Das fühlen sich selbstbewusster zu sein kann helfen, diese Anfälle von Nervosität und Unsicherheit zu reduzieren. Es gibt einige Dinge, die du tun kannst, um deine Selbstbewusstheit zu stärken:1. Selbstreflexion: Versuche, deine Stärken und Schwächen zu erkennen und zu nutzen. Dies kann dir helfen, dein Selbstvertrauen zu stärken und dich dazu zu ermutigen, neue Herausforderungen anzunehmen.2. Zi…
Manchmal habe ich plötzlich das Gefühl, keine Hobbys mehr zu haben, mich für nichts mehr zu interessieren und die Orientierung und Motivation verloren zu haben	Das fühlen sich selbstbewusster zu sein kann helfen, deine Orientierung und Motivation wiederzugewinnen. Es gibt einige Dinge, die du tun kannst, um deine Interessen und Hobbys wiederzubeleben:1. Überlege dir, was dir Freude bereitet: Überlege dir, was dir Freude bereitet und welche Aktivitäten du lieben. Es kann dir dabei helfen, deine Interessen und Hobbys wiederzubeleben.2. Suche nach neuen Ak…
Gelegentlich überkommt mich eine unkontrollierbare Emotion. Ich denke, was soll ich tun, wenn ich an einer Depression leide?	Es ist normal, dass manchmal überkommt, dass man unkontrollierbare Emotionen hat. Es ist wichtig, dass Sie sich zu Hause fühlen, um diese Emotionen zu verarbeiten und sich besser zu fühlen. Es gibt viele Dinge, die Sie tun können, um sich besser zu fühlen, wenn Sie an einer Depression leiden. Hier sind einige Dinge, die Ihnen helfen können: 1. Seien Sie geduldig mit sich selbst und machen Sie es …
Ich hatte immer das Gefühl, dass mein Körper sich sehr unwohl fühlt und ich habe alle möglichen seltsamen Symptome, aber die Ärzte sagen, dass ich bei guter Gesundheit bin, was mich sehr ängstlich und hilflos macht.	Es kann wirklich sehr unheimlich und ängstlich sein, wenn man das Gefühl hat, dass man krank ist, aber die Ärzte sagnen, dass man bei guter Gesundheit ist. Es ist wichtig zu verstehen, dass Ärzte auf ihre Fachkenntnisse und Erfahrungen vertrauen und es können Malpraktiken geben. Wenn du das Gefühl hast, dass du die richtige Diagnose bekommst, solltest du gründlich nachfragen und alternative Optio…
Aufgrund der langfristigen Anspannung leidet Huang Xiaoming häufig unter Schlaflosigkeit und verliert völlig das Gefühl für Tag und Nacht.	Das ist eine wichtige Information, die für die Entwicklung der Geschichte berücksichtigt werden sollte. Huang Xiaoming tritt in der Nacht in Erscheinung und verliert das Gefühl für Tag und Nacht. Dies kann auf verschiedene Dinge hindeuten, wie zum Beispiel auf eine körperliche Verfassung, die dazu neigt, sich in der Nacht zu regenerieren, oder auf eine psychische Störung, die das Schlaf-Wach-Rhyt…
Meine Beziehung zu meinen Freunden war schon immer nicht sehr gut, und ich finde es schwierig, echte Freunde zu finden. Das macht mich sehr einsam.	Es ist verständlich, dass das Schwierig fühlen kann, echte Freunde zu finden. Es kann hilfreich sein, sich aktiv daran zu versuchen, neue Menschen kennenzulernen und sich in Gruppen oder Clubs zu beteiligen, die deinen Interessen entsprechen. Es kann auch hilfreich sein, deine bestehenden Freundschaften zu stärken und mehr Zeit mit Freunden zu verbringen. Wenn du dich einfach einsam fühlen, kann …
Die Leute um mich herum denken immer, dass ich zu nervös bin und mir über Kleinigkeiten Sorgen mache. Wie kann ich mich entspannen?	Es gibt verschiedene Möglichkeiten, wie du dich entspannen kannst. Eine Möglichkeit ist es, regelmäßig Sport zu treiben oder andere Aktivitäten zu machen, die dir Freude bereiten und deine Aufmerksamkeit auf sich ziehen. Eine andere Möglichkeit ist es, regelmäßig Pausen einzulegen und dich zu entspannen, sei es durch Meditation, Yoga oder andere Entspannungsübungen. Es kann auch hilfreich sein, s…
Meine Schlaflosigkeit zwingt mich, jeden Abend einen Psychiater aufzusuchen	Es ist verständlich, dass wenn du schlaflos bist, eine Art von Hilfe benötigst. Der Besuch eines Psychiologen oder Psychiaters kann jedoch nicht notwendigerweise helfen, deine Schlafprobleme zu lösen. Es kann auch dazu führen, dass du mehr Geld ausgiebst, ohne dass es eine Lösung für deine Schlafprobleme bringt.Es gibt jedoch andere Methoden, die du ausprobieren könntest, um deine Schlafprobleme …
Ich habe das Gefühl, dass ich dem Druck der Familie und der Gesellschaft nicht standhalten kann und dass ich viele Dinge nicht erreichen kann	Es ist verständlich, dass du das Gefühl hast, dass du dem Druck der Familie und der Gesellschaft nicht standhalten kannst. Es kann auch schwer sein, viele Dinge zu erreichen, insbesondere wenn du alleine stehst und keine Unterstützung hast. Es ist jedoch wichtig, sich darüber im Klaren zu sein, dass es nicht notwendig ist, dass du alles erreichen musst, um glücklich zu sein. Es ist auch wichtig, …
Ich habe das Gefühl, dass sich meine Beziehungen verschlechtern, weder Familie noch Freunde vertrauen mir oder unterstützen mich mehr, ich fühle mich so verloren und hoffnungslos.	Es ist verständlich, dass du das Gefühl hast, dass sich deine Beziehungen verschlechtern und dass niemand mehr auf dich hören will. Es kann schwierig sein, sich in einer solchen Situation zu fühlen, aber es ist wichtig, dass du dich nicht allein haltst und dass du versuchst, das Vertrauen wiederzugewinnen.Es kann hilfreich sein, sich an professionelle Hilfe zu wenden, wie zum Beispiel an einen Th…
Ich fühle mich oft nicht in der Lage, meine Emotionen und mein Verhalten zu kontrollieren und verhalte mich oft impulsiv oder gewalttätig.	Das ist eine wichtige Information, die für die Entwicklung der Geschichte berücksichtigt werden sollte. Huang Xiaoming, der als Hauptfigur der Geschichte dargestellt wird, tritt in der Nacht in Erscheinung und verliert das Gefühl für Tag und Nacht. Dies kann auf verschiedene Dinge hindeuten, wie zum Beispiel auf eine körperliche Verfassung, die dazu neigt, sich in der Nacht zu regenerieren, oder …
Ich habe oft Angst davor, abgelehnt zu werden, deshalb sage ich selten meine Meinung	Es ist verständlich, dass man Angst davor hat, abgelehnt zu werden, wenn man etwas sagt. Aber es ist auch wichtig, dass man seine Meinung äußert und dass man sich nicht von seiner Angst gehemmt fühlt. Es gibt mehrere Dinge, die du tun kannst, um deine Angst zu reduzieren und deine Meinung auszudrücken:1. Achte darauf, deine Meinung aufrechtzuerhalten und nicht von der Meinung anderer zu beeinflus…
Im Teenageralter beginnt sich eine Depression langsam zu entwickeln	Die Depression beginnt normalerweise im Teenageralter in unterschiedlicher Intensität und Dauer zu entwickeln. Es ist wichtig zu beachten, dass Depressionen ein komplexes Symptom sind und sich in vielen Fällen über einen längeren Zeitraum entwickeln können. Es gibt viele Faktoren, die dazu beitragen können, dass eine Depression im Teenageralter entsteht, einschließlich hormoneller Veränderungen, …
Ich bin mit meinem Aussehen und meinem Körper unzufrieden, fühle mich nicht perfekt und fühle mich oft ängstlich und unsicher	Es ist normal, sich unzufrieden mit dem eigenen Aussehen und Körpergefühl zu fühlen, insbesondere wenn man in einer Phase der Veränderung ist, wie zum Beispiel im Teenageralter. Es ist auch normal, sich unsicher und ängstlich zu fühlen, insbesondere wenn man von anderen Menschen beurteilt wird oder wenn man sich selbst zu sehr konzentriert auf sein Aussehen.Es gibt jedoch einige Dinge, die du tun…
Ich habe immer Angst, dass das, was ich tue, nicht gut genug ist, auch wenn andere mich gelobt haben, kann ich meine Sorgen nicht loslassen	Es ist normal, sich unsicher zu fühlen, wenn man sich von anderen beurteilt oder wenn man sich selbst zu sehr konzentriert auf die negative Meinung. Es gibt jedoch einige Dinge, die du tun kannst, um deine Ängste zu reduzieren und deine Selbstzufriedenheit zu steigern:1. Konzentriere dich auf deine eigenen Werte und Prioritäten und lobe dich selbst für deine Erfolge.2. Denke darüber nach, warum d…
Es fiel mir immer schwerer, mich zu konzentrieren, egal ob beim Lesen oder beim Erledigen von Dingen, ich ließ mich leicht ablenken	Es ist normal, dass man sich manchmal schwer tut, sich zu konzentrieren. Es gibt viele Gründe dafür, darunter auch die übermäßige Belastung des Gehirns durch Stress oder Schlafstörungen. Wenn Sie sich jedoch schwer tut, sich konzentriert zu können, empfehle ich Ihnen, folgende Schritte zu unternehmen:1. Entspannung: Versuchen Sie, sich zu entspannen, bevor Sie arbeiten oder Ihren Tag anfangen. Si…
Ich habe immer das Gefühl, keinen Wert zu haben, ich weiß nicht, was der Sinn meiner Existenz ist, und ich fühle mich jeden Tag leer und hilflos.	Es ist verständlich, dass Sie sich so fühlen, wenn Sie sich selbst nicht wert oder einen Sinn in Ihrem Leben sehen. Es gibt viele mögliche Gründe, warum Sie sich so fühlen, aber ich möchte Ihnen sagen, dass es normal ist, solche Gedanken und Gefühle zu haben.Ein wichtiger Schritt, um sich selbst wertzuschätzen und Ihren Sinn in Ihrem Leben zu finden, ist es, Ihre Stärken und Talente zu identifizi…
Ich hatte Angst davor, mit Menschen zu interagieren, hatte Angst davor, abgelehnt, verspottet oder missverstanden zu werden, und ich fühlte mich oft allein und hilflos.	Es ist normal, sich für andere Menschen zu fürchten und sich Sorgen darüber zu machen, abgelehnt, verspottet oder missverstanden zu werden, insbesondere in sozialen Situationen. Es ist normal, uns unwohl zu fühlen, wenn wir uns in eine neue Umgebung begeben oder jemanden kennenlernen. Es ist jedoch wichtig, sich bewusst zu machen, dass diese Gefühle normal sind und dass es viele Möglichkeiten gib…
Ich war mit meinem Aussehen und meiner Figur sehr unzufrieden, fühlte mich hässlich und unattraktiv. Ich dachte oft darüber nach, mich einer Schönheitsoperation zu unterziehen und abzunehmen, machte mir aber auch Sorgen über die Risiken einer Operation und hatte Angst, von anderen lächerlich gemacht und abgelehnt zu werden.	Es ist verständlich, dass du dein Aussehen und deine Figur unzufrieden bist und darüber nachdenkst, sie zu verändern. Aber es ist auch wichtig zu verstehen, dass Schönheit ein subjektives Konzept ist und jeder Mensch seine eigene Vorstellung davon hat. Es gibt keine "richtige" Art und Weise, aussehen zu sein, und es gibt auch keine Möglichkeit, die Schönheit anderer zu bewerten oder zu verändern.…
Ich bleibe oft lange auf und mache beruflich Überstunden, wodurch sich meine körperliche Verfassung immer weiter verschlechtert, aber ich kann nicht damit aufhören, weil ich das Gefühl habe, dass ich nur auf diese Weise meinen Wert und meine Fähigkeiten unter Beweis stellen kann	Es ist verständlich, dass Sie sich sorgen um Ihren Arbeitsplatz und den Wert, den Sie leisten, haben. Tatsächlich ist es wichtig, dass Sie Ihre Fähigkeiten und Ihren Einsatz auf dem Arbeitsplatz unter Beweis stellen. Allerdings ist es auch wichtig, Ihre körperliche Gesundheit und Ihr Wohlbefinden zu schützen.Es gibt einige Dinge, die Sie tun können, um Ihr Wohlbefinden zu verbessern und Ihre körp…
Ich habe das Gefühl, dass ich immer süchtiger nach Spielen und sozialen Medien werde, als ob diese Dinge zu einem integralen Bestandteil meines Lebens geworden wären. Diese Abhängigkeit gibt mir das Gefühl, nicht in der Lage zu sein, mich daraus zu befreien und mich selbst zu verlieren. Ich hoffe, einen Weg zu finden, sie loszuwerden diese Abhängigkeit Methoden.	Es ist verständlich, dass Sie sich Sorgen um Ihre Abhängigkeit von Social Media und Spielen machen. Es ist jedoch wichtig zu beachten, dass Abhängigkeiten nicht von selbst beseitigt werden und dass es Hilfsmittel gibt, die Ihnen dabei helfen können, sie in den Griff zu bekommen.Eine mögliche Methode, um Ihre Abhängigkeit von Social Media und Spielen abzubauen, ist die "Abstinenz-Methode". Sie erf…
Es störte mich, dass meine Stimmung immer auf und ab war, manchmal war ich sehr glücklich, und manchmal war ich so deprimiert, dass ich mich sogar umbringen wollte.	Es scheint, dass Sie Sorgen haben und dass Sie das Gefühl haben, dass Ihre Stimmung immer auf und ab geht. Es ist wichtig zu beachten, dass Veränderungen in der Stimmung normal sind und dass es viele Faktoren dafür verantwortlich sein können. Es kann jedoch auch sein, dass Sie in eine depressive Episode verfallen, die professionelle Behandlung erfordert.Es gibt verschiedene Methoden, die Ihnen he…
Manchmal habe ich das Gefühl, dass niemand sich um mich kümmert und dass ich der einzige Mensch bin, auf den ich mich wirklich verlassen kann.	Es ist verständlich, dass du das Gefühl hast, dass niemand sich um dich kümmert. Diese Gefühle können tiefgreifend und einschneidend sein, und es ist wichtig zu wissen, dass es viele Möglichkeiten gibt, um diese Gefühle zu lindern und sich sicherer und stärker zu fühlen. Eine Möglichkeit, um sich sicherer und stärker zu fühlen, ist es, sich um dich selbst kümmern zu lassen. Das bedeutet, dich sel…
In letzter Zeit leide ich oft unter Schlaflosigkeit und wälze mich nachts ständig im Bett hin und her. Könnte das ein zugrunde liegendes psychologisches Problem sein?	Ja, es ist möglich, dass Ihre Schlafstörungen ein psychologisches Problem darstellen. Schlafstörungen können ein Symptom von psychischen Problemen wie Depressionen, Angstzuständen, Posttraumatischen Belastungsstörungen (PTBS) oder anderen psychischen Störungen sein. Wenn diese Störungen nicht behandelt werden, können sie sich negativ auf den Arbeits- und Lebensalltag auswirken.
Mein Verhältnis zu meiner Familie war noch nie gut, ich habe das Gefühl, dass sie mich nicht verstehen, mich nicht respektieren, ich fühle mich dadurch einsam	Das klingt sehr peinlich und verletzlich. Es ist wichtig zu wissen, dass es viele Menschen gibt, die ähnliche Erfahrungen machen. Es ist jedoch kein Zeichen der Schwäche, wenn man sich einsam fühlt. Es gibt viele Möglichkeiten, um sich mit anderen Menschen zu verbinden und sich zu entspannen, sei es über Hobby- oder Freizeitaktivitäten, soziale Netzwerke oder auch durch professionelle Hilfe suche…
Ich fühle mich oft innerlich leer und einsam und suche nach Dingen, um dieses Gefühl zu füllen, finde aber oft keine geeignete Möglichkeit, um diese Emotion zu lindern.	Es ist normal, dass manchmal innerlich leer und einsam fühlt. Es kann helfen, sich aktiv in soziale Beziehungen und Aktivitäten zu engagieren, um sich mit anderen Menschen zu verbinden und sich auszudrücken. Es kann auch helfen, sich Zeit für sich selbst zu nehmen, um ihre Bedürfnisse zu verstehen und sich zu entspannen. Wenn diese Ansätze nicht ausreichen, können auch therapeutische Hilfe suchen…
