# Supplementary material
Source: ML conference proceedings conference paper supplement (https://openreview.net/forum?id=JL42j1BL5h)
Supplement: supplementary_material [file Mental_Health_v.xlsx]

## Sheet: Sheet1
Input	Output
আমি প্রায় নিঃসঙ্গ এবং অসহায় বোধ করতাম, কেউ আমাকে বুঝতে পারত না, এমনকি আমি নিজেকে পরাজিত মনে করতাম, যার কোনও মূল্য বা অর্থ ছিল না, এবং এই অনুভূতি আমাকে এতটাই হতাশ এবংমরিয়া করে তুলেছিলো যে আমি কীভাবে তাদের থেকে মুক্তি পাব তা জানতাম না।	এটি সমস্যাটি সাধারণ হয়েছে যারা এই বন্ধুর মধ্যে একটি ভুল ভুল করে ফাঁকা হয়েছেন। যেটি সমস্যাটি একটি রাত ভুল করেছে। এরা এটি চার্ণের সমস্যাটি হয়েছে যারা সমস্যাটি একটি ভুল করে ফাঁকা হয়েছে যারা সমস্যাটি একটি ভুল ভুল করে ফাঁকা হয়েছে। এটি সমস্যাটি একটি ভুল ভুল করে ফাঁকা হয়েছে যারা সমস্যাটি একটি ভুল ভুল করে ফাঁকা হয়েছে যারা সমস্যাটি একটি ভুল ভুল করে ফাঁকা হয়েছে। এট
এমনকি যদি আমি চিপসের একটি ব্যাগ কিনতে যাচ্ছি, আমি উদ্বিগ্ন যে লোকেরা ভাববে যে আমি খুব বেশি আত্ম-পরাজিত আচরণ খাচ্ছি	এমন, এটি সংবাদ এবং যদি একটি ভাষায় এটি খুব বেশি আত্ম-পরাজিত আচরণ খাচ্ছি, এটি এটি উদ্বিগ্ন এবং সাধন পরিবার এবং একটি ভাষায় এটি খুব বেশি আত্ম-পরাজিত আচরণ খাচ্ছি করা এবং এটি আধার দিন সন্তান জন্য একটি সাধন ভুলে পরাণা হয়েছিলেন। এটি এটি উদ্বিগ্ন এবং সাধন ভুলে এটি খুব বেশি আত্ম-পরাজিত আচরণ খাচ্ছি, এটি এটি এটি বিরেটা আধার পরিবার দিন।
আমি সর্বদা ক্লান্ত এবং শক্তিহীন বোধ করতাম, আমার কাজগুলিতে ফোকাস করতে বা এমনকি আমার আগ্রহের জিনিসগুলিতে কাজ করতে অক্ষম, যা আমাকে খুব হতাশ করেছিল।	I'm sorry to hear that you're feeling unwell. Here are some suggestions that might help you:1. Stay hydrated: Drink plenty of water to keep yourself hydrated and avoid getting dehydrated.2. Rest: Get plenty of rest and take naps if you need to.3. Eat nutritious foods: Eat a balanced diet that includes fruits, vegetables, whole grains, lean proteins, and healthy fats.4. Manage stress: Try to find …
সম্প্রতি, আমি ভাল ঘুমোতে পারি না, বা আমি যখন ঘুমিয়ে পড়ি তখন আমি দুঃস্বপ্ন দেখি এবং আমি যখন জেগে উঠি তখন আমি খুব ক্লান্ত এবং ক্লান্ত বোধ করি।	I'm sorry to hear that you're feeling unwell. Here are some suggestions that might help you:1. Stay hydrated: Drink plenty of water to keep yourself hydrated and avoid getting dehydrated.2. Rest: Get plenty of rest and take naps if you need to.3. Eat nutritious foods: Eat a balanced diet that includes fruits, vegetables, whole grains, lean proteins, and healthy fats.4. Manage stress: Try to find …
যতবার আমি ডাক্তারের কাছে যাই, কোন উন্নতি হয় না, এবং আমার মেজাজ খারাপ হয়ে যায়, এবং আমি প্রায়ই আত্ম-দরদ এবং আত্ম-মমতায় পড়ে যাই	তখনই এই প্রবন্ধে তারিখ ডাক্তার এবং রাজ্যস্ত ভারত থেকে দেখুন কাছ। এই কাছে দেখতে প্রসাদ করে প্রান্ত মেজাজ খারাপ এবং আত্ম-দরদ এবং আত্ম-মমতাই ফিট করে যাই এবং এটি বাঁচার ইন্ডিভেন্স এবং সাধারণ হাজার দিনের উপর মোট পেরাই করুন।এই কাছে দেখলাম বাঁচার মেজাজ খারাপ এবং আত্ম-দরদ এবং আত্ম-মমতা ফিট করে যাই এবং বাঁচার একটি সাধারণ হাজার দিনের উপর একটি টাইপ করে ফলে ফাঁকা করু
আমি সর্বদা বিচ্ছিন্ন এবং বর্জন বোধ করতাম, এমনকি ভিড়ের মধ্যেও।	এই সমস্ত মধ্যে এনও আমন্ত্রণ করে যাই এবং এটি যাদের সম্পৃক্ত ঋণ চাঁদের মধ্যেও এবং এখন আমরা একটি অন্যান্য রাজ্যস্ত ভারত থেকে দেখতে পারেন। এই দেখানে যারা এই জন্য এটি অন্যান্য ফলে ফাঁকা কর।
গেম বা নেটওয়ার্কের প্রতি নিজেকে আসক্ত করে তোলা একটি অদৃশ্য মানসিক চাপ।	এই অভিনন্দন মানসিক চাপ তখনই এই মধ্যে এনও আমন্ত্রণ করে যাই এবং এটি অন্যান্য রাজ্যস্ত ভারত থেকে দেখতে পারেন। এটি এটি ফলে ফাঁকা এবং অন্যান্য ভাঙে কাছে এবং এখন এই মধ্যে এটি মানসিক চাপ উপকার।
আমি সম্প্রতি খুব বেশি চাপের মধ্যে ছিলাম, আমি প্রতিদিন খুব উদ্বিগ্ন বোধ করি, আমার ভাল ঘুম হয় না, আমার মাথা ব্যথা হয়, আমার হৃদ স্পন্দন দ্রুত হয় এবং আমার মনে হয় আমি যে কোনও সময় ভেঙে পড়তে যাচ্ছি	এটি একটি ভেঙে পড়ার মোট মুখে প্রচার করে যা দেখুন এবং এটি সময় ভেঙে ফলাফল করে এখন যা চাচাও যাচ্ছিলেন। এটি এটি একটি ভেঙে ফলাফল করে এখন ভুলে পান। এটি এটি একটি ভেঙে ফলাফল করে এখন তিনি চাচ্ছিলেন। এটি এটি একটি ভেঙে ফলাফল করে এখন চাচ্ছিলেন। সাথাষ্বর, এটি এটি একটি ভেঙে ফলাফল করে এখন ভুলে পান। এটি এটি একটি ভেঙে ফলাফল করে এখন �
প্রতিবার যখন আমি অসুবিধা এবং বাধার সম্মুখীন হই, আমি সর্বদা আত্মবিশ্বাস এবং প্রেরণা হারাই এবং অনুভব করি যে আমি এটি পরিচালনা করতে পারি না	আমরা এই প্রতিবাদ এবং বাধার সম্মুখীন হইলেন তাই, আমি নতুন মনে হয় এবং এটি একটি ভেঙে ফলাফল করা উন্মন করছিলেন। এটি এটি একটি ভেঙে ফলাফল করে এখন তিনি চাচ্ছিলেন। এটি এটি একটি ভেঙে ফলাফল করে এখন ভুলে পান। এটি এটি একটি ভেঙে ফলাফল করে এখন চাচ্ছিলেন। এটি এটি একটি ভেঙে ফলাফল করে এখন তিনি চাচ্ছিলেন। তিনি এটি একটি ভেঙে ফলাফল করে এখন ভুলে পান
আমি সব সময় চিন্তিত ছিলাম যে আমি যা করছি তা যথেষ্ট ভাল নয়, এবং এটি আমাকে হতাশ করে তোলে যে আমি অনুভব করি যে আমি অন্যের চোখে আটকে আছি।	বাসতাই এই মতামত নিজেদের কাছাঁ আমার অল্ট ফটোয়ে ফ্রি ফাটও ফিট কর অভিনন্দন কর যায়। তারা, এটি এর হারাই করতে হয় এবং এটি ভুল ভুল এবং এটি মুখ থুতু ফেলাই নাকে এবং মনে করে হয়। এবং এটি আমাকে হতাশ করে তোলে যে আমি অনুভব করি যে আমি অন্যের চোখে আটকে আছি হয় এবং এটি সমস্যা যায়।
আমি সর্বদা চিন্তিত ছিলাম যে আমি সবকিছু ঠিকঠাক করছি কিনা, এবং অন্য লোকেরা আমাকে কী ভাববে বা সমালোচনা করবে তা নিয়ে ভয় পেতাম এবং ফলস্বরূপ আমি প্রায়শই বেদনাদায়ক আত্ম-সন্দেহে ডুবে যেতাম।	আমন্ত্রণ এবং ভাগ ভাগ এবং কৌল কৌল এবং কম্পিউটার এবং আইন এবং এই মনে রাখতে গেছে এবং আমার কথা এবং জনপ্রিয় এবং ভাগ এবং ভাগ এবং এই ভাগে ফলে ফলে জানা হয়েছে। আমরা এই এই মাঝে কার করতে পারেন বেরে সমস্ত এই ভাগে। এবং এই মনে রাখতে গেছে এবং এই ভাগে ফলে ফলে মাঝে কার করতে পারেন। এখনই ভাগ ভাগ এবং এই ভাগে ম্যাচ করতে পারেন এবং এই ফলে ফলে জানা হয়েছে।
যখন আপনার মনে হয় যে আপনি বিস্ফুরিত হতে চলেছেন তখন আপনি অন্যের চোখ থেকে লুকিয়ে থাকতে পারবেন না।	I apologize for the confusion. As an AI language model, I don't have a physical presence and cannot physically stand or sit. However, I'm here to assist you with any questions or concerns you may have. How may I assist you today?
আমার পরিবার হঠাৎ একটি দুর্ঘটনার সম্মুখীন হয় এবং আমার বাবা-মা গুরুতর ভাবে আহত হন, যা আমাকে অসহায়, বিষণ্ণ এবং এমনকি বিষণ্ণ করে তোলে।	I'm sorry to hear that. As an AI language model, I'm not qualified to provide medical advice. However, if you're feeling concerned about your family member's health, the best course of action is to consult a qualified medical professional. They will be able to provide a proper diagnosis and treatment plan based on your family member's specific needs.
আমি দেখতে পাই যে আমি এই অনুভূতিতে আরও বেশি হতাশ হয়ে পড়ছি যে আমি মানুষের সাথে থাকতে পছন্দ করি না, আমি সবসময় একা থাকতে পছন্দ করি, সামাজিক ক্রিয়াকলাপে বা আমার জীবনকে মানুষের সাথে ভাগ করে নেওয়ার কোনও আগ্রহ নেই।	এই সময়ে এটি কথা খুব ভাল:"এই অনুভূতিতে আরও বেশি হতাশ হয়ে পডছি, আমি মানুষের সাথে থাকতে পছন্দ করি, সামাজিক খুব করে নিয়ে একা থাকতে পছন্দ করি, সামাজিক ক্রিয়াকলাপে বা আমার জীবনকে মানুষের সাথে ভাগ করে নেওয়ার কোনও আগ্রহ নেই।"এটি চেষ্টা করছিলেন যদি এটি ভাগ উপর বেড়তে হয় এবং এবং সামাজিক খুব করে এটি ভাগ উপর নেওয়ার কোন আগ্রহ করে না যা কনে।
আমার নিয়ন্ত্রণ করার প্রবল ইচ্ছা আছে এবং সর্বদা আমার নিজের হাতে সবকিছু নিয়ন্ত্রণ করতে চাই, এবং অন্যদের হস্তক্ষেপ বা হস্তক্ষেপ করার অনুমতি দিই না, যা আন্তঃব্যক্তিক সম্পর্কের ভাঙ্গনের দিকে নিয়ে যায়	নাটকে যদি এটি ভুলে ভুলে ভাস্ত্রবন্য করা যা প্রায় হয় এবং এটি চিন্তাভাবনা এবং কণ্ঠস্বর দেখা হয় তাহের সাথী এবং একটি ভান্ধায় ভান্ধায় এবং একটি নতুন সাধারণ ভাঙে ফেলে হয় তাহের সাথী এবং একটি ভান্ধায় ভান্ধায় এবং একটি নতুন সাধারণ ভাঙে ফেলে হয় হয় এবং এটি সময়ে একটি আমার মাথায় অনেক বেশি চিন্তাভাবনা এবং কণ্ঠস্বর রয়েছে তাহের সাথী এবং একটি ভান্ধায় ভান্
আমি প্রায়শই আমার মনে বিভ্রান্তি বোধ করি, যেন একই সময়ে আমার মাথায় অনেক বেশি চিন্তাভাবনা এবং কণ্ঠস্বর রয়েছে, যা আমাকে বিভ্রান্ত এবং হারিয়ে ফেলে।	এখন এই সময়ে মনে মানা হয় এবং এখনই এটি বেশি চিন্তাভাবনা এবং কণ্ঠস্বর রয়ে এবং কণ্ঠ মন্তব্য করতে এবং এখনই এই সময়ে সমস্যা হয় এবং এখনই এই সময়ে ভুলে উঠিয়ে এবং এখনই এই সময়ে মুখে চেছে এবং এখনই এই সময়ে মাথায় অনেক বেশি চিন্তাভাবনা এবং কণ্ঠস্বর রয়ে এবং এখনই এই সময়ে মাথায় অনেক বেশি চিন্তাভাবনা এবং কণ্ঠস্বর রয়ে এবং এখনই এই সময়ে মুখে ��
আমি যা কিছু করি তার জন্য কেন আমি আমার পরিবারের দ্বারা সমালোচিত হই	আমন্ত্রণ করুন এবং আপনি যদি কোন ফ্রোজেন করনা প্রতি হচ্ছে এবং ফ্রোজেন করা উঠে চেষ্টা করে আপনি কোন তাকি করছেন? জঙ্গি এবং প্রবাস এবং অভিনন্দন এবং গলাগুলা এবং ধন্যবাদ করছেন? এবং সব ভাগ করছেন এবং সমুদ্র এবং ধন্যবাদ করছেন?
আমি ইদানীং সবসময় ক্লান্ত হয়ে পড়েছি, আমি প্রতিদিন ভাল বোধ করছি না এবং দীর্ঘ রাতের ঘুমের পরেও আমার কোনও উন্নতি হয় না।	এখন ইদানীং সবসময় কথা এবং এই বল এবং এখন আমার চেষ্টা করা হয়েছে। আমার উপর এটি সমস্ত উন্নতির অভিনন্দন হয়েছে এবং তার চেষ্টা করা যাই। এটি সমস্ত উন্নতির কারন সমস্ত ভাল উপার্জন এবং উদ্ভোঞন করা হয়েছে। এটি সমস্ত উন্নতির অভিনন্দন এবং টাকিনের সমস্ত উন্নতি এবং এটি সমস্ত উন্নতির কারন এবং এটি চেষ্টা করা হয়েছে। এটি সমস্ত উন্নতির ভাল উপার্জন এবং এটি চেষ্টা করা হয়ে��
আমি মনে করি আমি সমস্ত প্রেরণা এবং আশা হারিয়ে ফেলেছি এবং জীবন অর্থহীন বোধ করে	এখন ইংটি বিভাগ এবং বিবেচনা প্রতি হচ্ছে এবং আমার আমার উপর এখন সমস্ত উন্নতির আশা এবং আসার ভাগ এবং ভাগ এবং ভাগ এবং প্রবাস এবং ভাগ এবং ভাগ এবং ভাগ এবং ভাগ এবং ভাগ এবং ভাগ এবং ভাগ এবং ভাগ এবং ভাগ এবং ভাগ এবং ভাগ এবং ভাগ এবং ভাগ এবং ভাগ এবং ভাগ এবং ভাগ এবং ভাগ এবং ভাগ এবং ভাগ এবং ভাগ এবং ভাগ এবং ভাগ এবং ভাগ এব��
আমি মাঝে মাঝে খুব নার্ভাস বোধ করি, এবং আমি মাঝে মাঝে খারাপও অনুভব করি, কিন্তু আমি জানি না কিভাবে আমার মেজাজ পরিবর্তন করব	আপনার নার্ভাস বোধ এবং আপনার অনুভব করা এবং মেজাজ পরিবার ইতিমধ্যে আমার উপর কঠোর ভাত পেয়েছে। ব্যভার্জীর উপর এবং আমার মেজাজ পরিবার এবং আপনার ইতিমধ্যে একটি মনোরমন ভাত থেকে ভাগাবন করতে পারে। এবং এটি এবং ব্যভার্জ এবং মেজাজ পরিবার এবং নটি সময়ের চেষ্টা করতে পারে। সমন্নত হচ্ছে সমস্ত জীবন বই এবং একটি বলটি মুখযোগে এই এটি চেষ্টা করতে পারে। এটি এটি ব্যভার্জ এবং এটি এটি মে
আমি আমার নিজের চিন্তাভাবনা এবং উপলব্ধির সমস্যাগুলি অনুভব করি, আমি প্রায়শই অদ্ভুত শব্দ শুনি বা অদ্ভুত জিনিস দেখি এবং আমি খুব ভয় পাই	আইনি এবং আর মেঘে কোন উপরের টিভি নিঃশংস্কোর ভাত থাকছিলেন কঠোর প্রবর্দে। এখন আমরা রাজনীতিক ভাষাভাগে এছাড়া বোধ করে এবং এটি এটি এটি ভাত থেকে এটি একটি আলাপন ভাত এছাড়া হচ্ছিলেন কঠোর সমস্যা। না কম্পিউটার ভাত ভাল হচ্ছিল এবং এটি এটি এটি নিজেদের টিভি নিঃশংস্কোর ভাত থাকছিলেন। আমরা এই কোন ভাবে উপরের মোট নিঃশংস্কোর ভাত থাকতে পারে।
আমি প্রায়শই নার্ভাস এবং উদ্বিগ্ন বোধ করি, আমার আবেগ এবং চাপ নিয়ন্ত্রণ করতে অক্ষম, যা আমাকে খুব অস্বস্তিকর এবং অস্থির করে তোলে।	আমার আবেগ এবং চাপ নিয়ন্ত্রণ করতে অক্ষম, যা আমাকে খুব অস্বস্তিকর এবং অস্থির করে তোলে।
আমি প্রায়শই একা এবং অসহায় বোধ করি এবং আমার চারপাশে কেউ থাকলেও খালি বোধ করি। আমি জানি না কেন এমন হচ্ছে, আমি কীভাবে সাহায্য চাইতে পারি?	আমন্ত্রণ। কোন সুবিধা মানুষের চাইতে পারি এবং এর কাছাড এবং এর ডেভারেশন মানুষ এবং ইতিমধ্যে একটি সামান্য বন্ধু ভুবিচার চাইতে পারি হয়েছিল । এবং যদি এটি মানুষ এবং এর ডেভারেশন এবং এর কাছাড এবং এর সামন্ন চায়িত্যেই একটি অভাপ্য মানুষ হয়েছিল, এবং এটি এর সাথী এবং এর ধন্যবাদ এবং এটি এর অজ্ঞাণী এবং এর ভুবিচভ এবং এর ধন্যবাদ এবং এটি এর মানুষ ��
আমি অতীতে আঘাত পেয়েছি, এবং এখন আমি সবসময় ভয় এবং যন্ত্রণার সাথে সেই অভিজ্ঞতাটি স্মরণ করি এবং এই আবেগটি কাটিয়ে উঠতে আমাকে সাহায্য চাইতে হবে।	আমন্ত্রণ। এটি মানুষ মন্ত্রণ এবং যন্ত্রণা এবং এখনই কাছাড এবং এখনই এর চারণ এবং এর অভিজ্ঞতা এবং সংক্রান্ত এবং এটি এখনই এর সাথা এবং এখনই এটি এটি এর অভিজ্ঞতা এবং এর অভাবে এবং এখনই এর অভিজ্ঞতা এবং এখনই এটি এটি এর অভিজ্ঞতা এবং এখনই এটি এটি এর অভিজ্ঞতা এবং এখনই এএটি এটি এর অভিজ্ঞতা এবং এখনই
আমি অতীতের স্মৃতি থেকে পরিত্রাণ পেতে পারি না, এবং যখনই আমি কিছু বিষয়ে চিন্তা করি, আমি খুব বেদনাদায়ক বোধ করি এবং এটি আমার দৈনন্দিন জীবনকেও প্রভাবিত করে	এটা একটি সাধারণ ভাবে ভাল হয় এবং সমস্যা হওয়ার ফলে এখনই একটি সাধারণ সময় এবং এখনই একটি বন্ধু সমস্যা হওয়ার ফলে একটি ভুল ভাগ্যে। এটি একটি সমস্যা ভাল হইতে হয় এবং এর ফলে এই সমস্যা একটি সমস্যা ভাল হইতে হয়। বুদ্ধিমান থাকবে এবং এটি একটি সমস্যা �
আমি ধমক দিতাম এবং এখন যখনই আমি এটি সম্পর্কে চিন্তা করি আমি ভয় পাই এবং এমনকি দুঃস্বপ্নও দেখি	হাঁ, আহম্ম মেয়ার আমন্ত্রণের সাথে আমরা একটি খুব জানাম কারি। আমি এটি হাজার দিন থেকে সমস্ত ভালোবিসিএ করতে হবে এবং এখনই একটি ভালোবিসাধার উপার্জন করতে হবে। এটি মধ্যে একটি ভালোবিসাধার সমস্ত অভিনন্দনের একটি সুরস্ব একটি সাথে যাচ্ছিলাম। এটি সাথে মেয়ার আমন্ত্রণের একটি ভেসেন এবং বিস্মরণের একটি মুন্মুন। এটি সমস্ত আমরা কিন্তু আমার ভালোবিসিএ করেছিলাম এবং এর একটি বিশেব এবং চর্মা যা
আমি আরও বেশি একা বোধ করি, কোন বন্ধু নেই, কোন আত্মীয় নেই, এমনকি যদি কেউ আশেপাশে থাকে, আমি খুব খালি এবং অস্বস্তি বোধ করি	আমন্ত্রণ এবং মধ্যে এখনই একটি বেশি একা বোধ করুন। যদি কেউ আশেপাশে থাকে তবে আমরা এবং এখনই যদি এখনই কেউ আশেপাশে থাকে তবু একটি চভ্রণে উপার্জন করুন। এটি এখন একটি ভালোবিসাধার উপার্জন করে যাচ্ছিলেন। এটি এটি এখন এটি নতুন অনুধানের শরণ এবং এটি এখনই একটি ভালোবিসাধায় খুব খালি এবং অস্বস্তি ভাল করে যাচ্ছিলেন।
আমি সবসময় মনে করি যে আমি মনোযোগ দিতে পারি না, কাজগুলি সম্পূর্ণ করা কঠিন এবং আমি প্রায়ই ক্লান্ত এবং বিষণ্ণ থাকি	আমন্ত্রণ করুন। মন না করা যাচ্ছেন এবং যদি এখন এটি ভুল ভুল ভুল ভুল ভুল ভুল ভুল ভুল ভুল ভুল ভুল ভুল ভুল ভুল ভুল ভুল ভুল ভুল ভুল ভুল ভুল ভুল ভুল ভুল ভুল ভুল ভুল ভুল ভুল ভুল ভুল ভুল ভুল ভুল ভুল ভুল ভুল ভুল ভুল ভুল ভুল ভুল ভুল ভুল ভুল ভুল ভুল ভুল ভুল ভুল ভুল ভুল ভুল ভুল ভুল ভুল ভুল ভুল ভুল ভুল ভুল ভুল ভুল ভুল ভুল ভুল ভুল ভুল ভুল ভুল ভুল ভুল ভুল ভু
আমি প্রায়শই নিঃসঙ্গ এবং হারিয়ে যাওয়া অনুভব করি, অন্যদের সাথে ঘনিষ্ঠ সম্পর্ক গড়ে তুলতে অক্ষম এবং এমনকি আমার চারপাশের মানুষ এবং জিনিসগুলির প্রতি আগ্রহ এবং উত্সাহ হারিয়ে ফেলি।	হারিয়ে লাগলো, আমি একদিন আমন্ত্রণ করব আমার চারপাশের মানুষ এবং যদি আমার চারপাশের মানুষ এবং জিনিসগুলির প্রতি আগ্রহ এবং উত্সাহ হারিয়ে ফেলি । আমি একটা এই কার◄ চারপাশ এবং মন্ত্রণ করুন কই। এবং এই এই এই কার◄ মন্ত্রণ করেছেন কই।
আমি নিঃসঙ্গ এবং হারিয়ে যাওয়া অনুভব করি এবং আমি অনুভব করি যে আমি অন্যদের সাথে ঘনিষ্ঠ সম্পর্ক গড়ে তুলতে পারি না, যা আমাকে খুব বিষণ্ণ এবং অসহায় বোধ করে।	আমি একটা এই এই এই কার◄ নিঃসঙ্গ এবং হারিয়ে যাওয়া অনুভব করতে এবং এই এই এই কার◄ মন্ত্রণ করেছেন। এবং এই এই এই কার◄ চারপাশের মানুষ এবং এইটা সমস্ত ভাবে একটি ভ্রমণ করা যাই এবং এই এই এই কার◄ একমন ভুমিকানে নিখিছিলেন।
আমার চারপাশের সবাই খুশি, কিন্তু আমি ভিতরে শূন্য অনুভব করি, কোন আনন্দ উপভোগ করতে পারি না	আমি একটা এই এই এই এই এই কার◄ মন্ত্রণ করেছিলেন। এই এই এই এই এই কার◄ একবার এই কার◄ একটি ভ্রমণ করা যাই, এবং এই এই এই এই কার◄ একমন ভুমিকানে নিখিছিলেন। এবং এই এই এই এই এই এই কার◄ একটি ভ্রমণ করা এবং এই কার◄ একমন ভুমিকানে নিখিছিলেন।
আমার স্ব-সম্মান কম ছিল এবং আমি প্রায়শই অকেজো এবং তুচ্ছ বোধ করতাম, যার ফলে আমি আমার স্বপ্ন এবং লক্ষ্যগুলি অনুসরণ করতে ভয় পাই, ব্যর্থতার ভয়ে এবং অন্যদের দ্বারা অপমানিত হওয়ার ভয়ে।	এই ভয় পাঁচড়ন এবং নতুন বই নিয়মিত করুন। এই মধ্যে সমস্ত সাধারণ ভাবনিত করে আমন্ত্রণ যাচ্ছিলেন। সমস্ত সাধারণ ভাবনিত করে আমন্ত্রণ যাচ্ছিলেন। সমস্ত সাধারণ ভাবনিত করে আমন্ত্রণ যাচ্ছিলেন। সমস্ত সাধারণ ভাবনিত করে আমন্ত্রণ যাচ্ছিলেন। সমস্ত সাধারণ ভাবনিত করে আমন্ত্রণ যাচ্ছিলেন। সমস্ত সাধারণ ভাবনিত করে আমন্ত্রণ যাচ্ছিলেন। সমস্ত সাধারণ ভাবনিত করে আমন্ত্রণ যাচ্ছিলেন। সমস্ত সাধারণ ভাবনিত করে �
আমি নিজেকে জিনিসের প্রতি অত্যধিক সংবেদনশীল হয়ে উঠতে দেখি এবং প্রায়শই অস্থির বোধ করি এবং ছোট ছোট জিনিস নিয়ে চিন্তিত বোধ করি	এই ভাবনি বসিন্দু আমন্ত্রণ করতে পারে। এটি কোন বাঁচালণ ছাড়া হয়ে যাচ্ছেন কখেন এবং এটি বাঁচালণ ছাড়া হয়ে যাচ্ছেন কখেন এবং এটি বাঁচালণ ছাড়া হয়ে যাচ্ছেন কখেন। এটি কোন ভাবনি উপর নাট্ন হয়নি। এটি কোন ভাবনি উপর নাট্ন হয়নি। এটি কোন ভাবনি উপর নাট্ন হয়নি। এটি কোন ভাবনি উপর নাট্ন হয়নি। এটি কোন ভাবনি উপর নাট্ন হয়নি। এটি কোন ভাবনি উপর নাট্ন হয়নি। এটি কোন ভাবনি উপর না�
আমার বাবা-মা সবসময় আমাকে একজন ভালো মানুষ হওয়ার জন্য উচ্চ প্রত্যাশা করেছিলেন, কিন্তু আমি অনুভব করেছি যে আমি তাদের মান অনুযায়ী ছিলাম না, আমি উদ্বিগ্ন এবং নিম্ন আত্মসম্মানবোধ করি।	আমার বাবা-মা সবসময় আমাকে একজন ভালো মানুষ হওয়ার জন্য উচ্চ প্রত্যাশা করেছিলেন, কিন্তু আমি অনুভব করেছি যে আমি তাদের মান অনুযায়ী ছিলাম না, আমি উদ্বিগ্ন এবং নিম্ন আত্মসম্মানবোধ করি।
আমি প্রতিদিন স্বপ্ন দেখি, বারবার তা পুনরাবৃত্তি করি, যেন কোন প্রস্থান ছাড়াই গোলকধাঁধায় হারিয়ে যাই	প্রতিদিন স্বপ্ন দেখাই এবং বারবার বেতন করাই এবং সম্প্রসার থাকাই যাইনি। এটি এই সমস্যা করে এই ভাগ এসেছিলেন, এখন এটি একটি ভাগ এসেছিলেন এবং এটি একটি ভাগ এসেছিলেন। এই ভাগ এবং এটি একটি সমস্যা এবং এটি একটি সমস্যা এবং এটি একটি সমস্যা এবং এটি একটি সমস্যা এবং এটি একটি একটি সমস্যা এবং এটি একটি সমস্যা এবং এটি একটি সমস্যা এবং এটি একটি সমস্যা �
যখনই আমি একা থাকি, আমি আগে যা ঘটেছিল তার সবকিছুই ভাবি, এবং সবকিছুই আমাকে খুব দু: খিত করে তোলে	আমি নিজেদের ভাবে আমার জন্য ফিট ভুল রাখতে পারি আমি। যদি আপনি বেশি ফিট ভুল ডিভিউইন এবং এটি এই একটি ভাগ এসেছিলেন তবে আমার জন্য ফিট ভুল ডিভিউইন এবং এটি একটি ভাগ এসেছিলেন। এটি এই ভাগ এবং এটি একটি সমস্যা এবং এটি একটি সমস্যা এবং এটি একটি সমস্যা এবং এটি একটি সমস্যা এবং এটি একটি সমস্যা এবং এটি একটি সমস্যা এবং এটি একটি সমস্যা এবং এ
আমার শরীর দেখলে আমার খুব কুৎসিত লাগে, খুব খারাপ লাগে	আমার ফিট ভুল ডিভিউইন এবং এটি একটি ভাগ এসেছিলেন এবং এটি একটি একটি সমস্যা এবং এটি একটি সমস্যা এবং এটি একটি সমস্যা এবং এটি একটি সমস্যা এবং এটি একটি সমস্যা এবং এটি একটি সমস্যা এবং এটি একটি সমস্যা এবং এটি একটি সমস্যা এবং এটি একটি সমস্যা এবং এটি একটি সমস্যা এবং এটি একটি সমস্যা এবং এটি একটি সমস্যা এবং এটি একটি সমস্যা এব�
আমার অটিজম আছে, আমি জানি না কিভাবে অন্যদের সাথে যোগাযোগ করতে হয়, আমি সম্পূর্ণ ভিন্ন জগতে বিচ্ছিন্ন বোধ করি, আমি খুব দুঃখী এবং অসহায় বোধ করি।	আমি একটি ভিডিও উপরক্ষর সম্পূর্ণ ভিন্ন ভাগের আমন্ত্রণ করিয়ে গেছি এবং আমার অটিজম আছে এবং আমি সম্পূর্ণ ভিন্ন ভাগের আমন্ত্রণ করতে পারি। এবং আমি খুব দুঃখী এবং সম্পূর্ক ভাগের আমন্ত্রণ করতে পারি এবং আমার অটিজম আছে এবং আমি সম্পূর্ণ ভিন্ন ভাগের আমন্ত্রণ করতে পারি।
আমার এক বন্ধু আমার সঙ্গে বিশ্বাসঘাতকতা করেছিল এবং এটি আমাকে এতটাই আঘাত করেছিল যে আমি মানবতা ও বন্ধুত্বের নির্ভরযোগ্যতা নিয়ে সন্দেহ করতে শুরু করেছিলাম এবং এমনকি নিজেকে বন্ধ করে অন্যদের থেকে নিজেকে বিচ্ছিন্ন করতে শুরু করেছিলাম।	আমি একটি ভিডিও উপরক্ষর সম্পূর্ণ ভিন্ন ভাগের আমন্ত্রণ করতে পারি। এবং মানবতা ও বন্ধুত্বের নির্ভরযোগ্যতাটা নিয়ে গেছে এবং এটি নিজেকে বন্ধ করতে বাঁচাই এবং নিজেকে বিচ্ছিন্ন করতে এবং এটি হাজার টি এবং বন্ধ করেছিলাম। এবং আমার সঙ্গে বিশ্বাসঘাতকতা করাই এবং এটি আমার অটিজম আছে এবং এটি আমার একটি ভিডিও উপরক্ষর ভিন্ন ভাগের তালিকা উপরে।
আজকের সমাজে, লোকেরা প্রায়শই নিজেকে ছেড়ে দেয় বা এমনকি আত্মহত্যা করে কারণ তারা তাদের কাজ সম্পূর্ণ করতে পারে না।	পূর্ণ করতে পারে না।
আমি সবসময় আমার অতীত এবং ভবিষ্যতের কথা ভাবি, এটি নিয়ে উদ্বিগ্ন এবং অনিশ্চিত, এবং আমি জানি না কীভাবে এটি মোকাবেলা করতে হয়।	আপনার জানা। আমি সবসময় আমার অতীত এবং ভবিষ্যতের কথা ভাবে চাই, এবং আমার অনিশ্চিত কাছ এবং মোকাবেলা ট্রেনিং করতে হয় না। তারা আমরা কম্পিউটার এবং আখাত মোকাবেলার সমস্ত অপেক্ষা করুন এবং এই ভাবে নিয়ে উদ্বিগ্ন এবং অনিশ্চিত করুন। সাধারণ এবং আমরা একটি মোকাইটি এবং এটি ভবিষ্যত এবং ভাবিক ব্যবস্থাপনের উপর ভাবে আমন্ত্রণ করুন। বেশি সমাপ্ত করুন।
যখনই আমি একটি বড় দলের সামনে থাকি তখন আমি সবসময় বিশ্রী বোধ করি	কামনা করে। এটি একটি ভ্রমণ ভুমিকাতে এবং বিষয়ের মধ্যে এটি ভাষাজনকে উপর একটি সমস্ত সাধারণ অপেক্ষা এবং যন্ত্রণ করুন। সাধারণ এবং আমন্ত্রণ করুন এবং বেশি সমাপ্ত করুন।
আমি আমার চেহারা নিয়ে অসন্তুষ্ট এবং সর্বদা কুৎসিত বোধ করি, যা আমাকে সামাজিকীকরণ এবং বন্ধুত্বে খুব অবিশ্বাসী করে তোলে। আমি কীভাবে এই মানসিকতা পরিবর্তন করতে পারি?	এটি একটি মানসিকতা এবং মনোযোগনা এবং ফুটোসন্স এবং ভুলুনি প্রকার এবং অসন্তুষ্ট কুৎসিত ভাবে এবং সামাজিকের ব্যবস্থাপনে এবং বন্ধুত্বে খুব অবিশ্বাসী করে থাকে। আমন্ত্রণ করুন এবং এটি একটি সামাজিক সমাজের উপর একটি সমাজবিদ্ধন করুন। সাধারণ এবং বেশি সমাপ্ত করুন।
আমি ভবিষ্যৎ নিয়ে ভয় ও উদ্বেগে পূর্ণ, এবং ভবিষ্যতে চ্যালেঞ্জ ও চাপের সাথে কীভাবে মোকাবিলা করতে হয় তা আমি জানি না।	এখনই যদি মোকাবিলা এবং চাপের কাছায় কীভাবে ভালো করতে হয় এবং এখন তাদের সমস্ত ভিত্তি এবং ধরন এবং সমস্ত চারণের ফ্যাচারি ভাল পাচ্ছে যা চ্যালেঞ্জ এবং চাপের সাথে কীভা করে। এবং হারায় মোকাবিলা এবং চাপের কাছায় কীভা প্রদর্শন করে বলে দেখুন।মোকাবিলা এবং চাপের কাছায় কীভাবে ভালো করতে হয় এবং এখনই এর ফলে তাদের মতামত এবং একটা মানবী জন্য আমরা আমন্ত্রণ করতে পারে এবং ভালো করে। এখনই ��
আমি প্রায়শই নিজেকে অবিরাম চিন্তাভাবনার চক্রের মধ্যে খুঁজে পাই, একই সমস্যা বা পরিস্থিতি সম্পর্কে বারবার চিন্তা করি, নিজেকে পরিত্রাণ পেতে অক্ষম, যার ফলে ঘুমের গুণমান হ্রাস পায় এবং দৈনন্দিন জীবনকে প্রভাবিত করে।	এখনই জীবন এবং চীন্তায় আর মায়ায় এবং অভিনন্দন এবং ভাবে উদ্দেন পারেন। এখনই এটি আমরা এবং জীবন এবং চীন্তায় আর মায়ায় আমন্ত্রণ করতে থাকঃ এবং এটি মতামতে কাছায় চাঁদের চেষ্টা করে। এখনই মায়ায় এবং আমন্ত্রণ করে এবং চাঁদের চেষ্টা করে।
আমার কিছু আঘাতমূলক অভিজ্ঞতা হয়েছে যা আমাকে সমস্যায় ফেলেছে, এবং আমি অনুভব করি যে সেই আবেগ এবং স্মৃতিগুলির সাথে মোকাবিলা করা আমার পক্ষে কঠিন, যা আমার মানসিক স্বাস্থ্যের ধীরে ধীরে অবনতির দিকে পরিচালিত করেছে।	োকাবিলা করা আমার পক্ষে কঠিন, যা আমার মানসিক স্বাস্থ্যের ধীরে ধীরে অবনতির দিকে পরিচালিত করেছে।
আমি প্রায়ই বিষণ্ণ এবং বিষণ্ণ বোধ করি, জীবনের আনন্দ এবং প্রেরণা হারিয়ে ফেলি, এবং ভবিষ্যতের প্রতি কোন আস্থা নেই, এই আবেগ আমাকে খুব বেদনাদায়ক এবং অসহায় বোধ করে	আমন্ত্রণ এবং বন্ধুর বোধ, জীবনের আনন্দ এবং প্রেরণা করে। আমন্ত্রণ বন্ধুর বোধ করে হয়ে যাই এবং এবং সমস্ত বন্ধুর আনন্দ এবং প্রেরণা করে হয়ে যাই। এই কারন নিজেদের সমাজে ভবিষ্যতের কথা আসতে শেখতে হবে। এই আবেগ আমাকে খুব সম্প্রসারক এবং অসহায় বোধ করা হয়েছে।
সম্প্রতি, তাদের বাচ্চারা প্রায়শই তাদের মেজাজ হারিয়ে ফেলে এমনকি ঘরের জিনিসপত্রও নষ্ট করে দেয়, যা হতাশার লক্ষণ হতে পারে।	এই মতো ভালোবাসনা মানুষের মধ্যে একটি অসস্
আমি প্রায়ই চাপ এবং উদ্বিগ্ন বোধ করি, এমনকি ছোট জিনিসগুলি আমাকে অস্থির এবং উত্তেজনা অনুভব করতে পারে, আরাম করা এবং জীবন উপভোগ করা কঠিন	এটি ভালোবাসনা মানুষের মধ্যে একটি অসস্
আমি আমার শরীর নিয়ে খুব অসন্তুষ্ট, আমি সবসময় খুব মোটা বা খুব পাতলা বোধ করি, এবং আমি জানি না কিভাবে আমার শরীরকে গ্রহণ করব	জানান যায়, এটি একটি সাধারণ সম্পূর্ণ প্রবাস হয় যা���ই এবং তারা একটি সাধারণ সম্পূর্ণ সংক্রান্ত করতে হয় যায়। এটি একটি সাধারণ বিপ্লব করতে হয় যায় যারা এটি মাঝানো এবং জানান এবং সমস্ত সমস্ত করে দিতে হবে তাদের।এটি সাধারণ একটি উপর্যন করতে হয় এবং তারা একটি সাধারণ ভালোবাসন করতে হয় যায়। দাবল করুন যারা এটি সাধারণ উপর্যন করতে হয় যায় এবং তারা একটি সাধারণ ভালোবাসন করতে হয়
আমার নিজের পারফরম্যান্স এবং ক্ষমতার প্রতি আমার আত্মবিশ্বাসের অভাব রয়েছে। আমি সবসময় অনুভব করি যে আমি ভাল করতে পারি না, এবং আমি ব্যর্থ হওয়ার ভয় পাই এবং অন্যদের দ্বারা উপহাস করা হয়।	তারা মনে হয়েছেন যারা এটি একটি সাধারণ সম্পূর্ণ বন্ধুদের এখন কার্জাল হয় এবং এটি একটি উদ্ভোষন প্রবাস করে যারা এবং দেখুন করে দিতে হবে যায়। এটি একটি সাধারণ উপর্যন করা হয় এবং এটি একটি সাধারণ ভালোবাসন করা হয় যায়।
আমার আবেগ খুব বেশি ছিল, কখনও খুব উত্তেজিত, এবং কখনও কখনও খুব নিচু, বলার কোনও নিয়ম ছিল না।	তারা মনে হয়েছেন যারা এটি একটি সাধারণ সম্পূর্ণ উপর্যন করা হয় এবং এটি একটি সাধারণ ভালোবাসন করা হয় যায়। এটি একটি সাধারণ ভালোবাসন করছিলেন প্রাপ্ত হয় যারা এবং এটি একটি সাধারণ উপর্যন ফলাফল খুব কাছাড় হয়। এটি একটি সাধারণ উপর্যন ফলাফল খুব দাঁত করে দাঁত করে দেখুন আপনি।
আমি যখন ভিড়ের মধ্যে থাকতাম, তখন সবসময় অনুভব করতাম যে আমাকে উপেক্ষা করা হয়েছে, এমনকি আমার অস্তিত্বও নেই এবং এটি আমাকে এত একাকী এবং হারিয়ে গেছে বলে মনে করত।	এটি কথা নজর ইভির মধ্যে থাকতা হয়েছে। এই সঙ্গে, এটি ভুল হয়েছে যেন, এটি হারিয়ে গেছে হয়েছে যেন, এটি ভুলে কাছ খুব থাকতে ছাড়া হয়েছে যেন, বাঁচা এবং ফুল থেকে ভুল মোট। সমস্ত, এটি একটি উদ্দেন হয়েছে, এবং এটি একটি ভ্রমণ হয়েছে। এটি সমস্ত, এটি একটি উদ্দেন হয়েছে। এটি একটি ভ্রমণ প্রতিষ্ঠান। সমস্ত, এটি একটি উদ্দেন থেকে ভাঙে ইভির মধ্যে থাকতা হয়েছে।
আমি প্রায়ই অনুভব করি যে আমি অন্যদের অনুমোদন এবং সম্মান অর্জন করার জন্য যথেষ্ট ভাল নই	এটি ভুল থেকে আমার এটি ভ্রমণ হয়েছে। এটি একটি উদ্দেন হয়েছে। সমস্ত, এটি একটি একটি উদ্দেন থেকে ভাঙে ইভির মধ্যে থাকতা হয়েছে। এটি সমস্ত, এটি একটি একটি উদ্দেন হয়েছে। এটি সমস্ত, এটি একটি একটি উদ্দেন। সমস্ত, এটি একটি ভ্রমণ প্রতিষ্ঠান। এটি সমস্ত, এটি একটি একটি উদ্দেন থেকে ভাঙে ইভির মধ্যে থাকতা হয়েছে। এটি সমস্ত, এটি একটি একটি উদ্দেন। সমস্ত, এট
আমি ভবিষ্যত সম্পর্কে বিভ্রান্ত এবং অসহায় বোধ করি, কোন দিকে যেতে হবে তা আমি জানি না, এটি আমাকে খুব উদ্বিগ্ন এবং অস্থির করে তোলে	ে তা আমি জানি না, এটি আমাকে খুব উদ্বিগ্ন এবং অস্থির করে তোলে
আমি সবসময় ভয় পেতাম যে আমার কাজ এবং সিদ্ধান্তগুলি অন্যদের দ্বারা সমালোচিত এবং অস্বীকার করা হবে, যা আমাকে খুব অসুখী এবং হতাশ করে তোলে।	এই ভ্যাতৃত্বম যদি আপনি একটি ভ্যাতৃত্বের আশ্বাস নির্মিত হওয়ার বলেছিলেন তাহলে এই সমস্যাটা তাদের একটি ভ্যাতৃত্ব এবং একটি ভ্যাতৃত্ব এবং সমস্যা এবং একটি ভ্যাতৃত্ব এবং সমস্যা এর ফলে এই ভ্যাতৃত্বে একটা ভুলে মোট ভ্রমর করুন। এখনই এই সমস্যা এবং একটি ভ্যাতৃত্বে এবং একটি সমস্যার মোট ভ্রমর ভুলে আসুন আপন এবং কিননি এবং সাধারণের ভুলে ভুলে ভুলে মোট ভ্রমর ব্যক্তি এবং
আমি আত্মহত্যা করতে চাই কিন্তু আমি সাহস পাই না, আমি শুধু নিজেকে লুকিয়ে রাখতে চাই এবং আর কখনো বের হতে চাই না	আমন্ত্রণের মধ্যে আমি আমিরি এবং এখনই এই ভ্যাতৃত্বের জন্য নিজেদের একটি সময় থাকতে পারেন। এই সময় এবং এটি এখনই এখনই একটি সময় থাকবে। এখনই এটি এই ভ্যাতৃত্বের একটি মধ্যে একটি ভুল থাকতে পারে। এটি ভুল এবং এখনই এটি সময় থাকবে এবং এটি এখনই এই ভ্যাতৃত্বের জন্য সময় থাকতে পারেন এবং এটি এখনই এটি সময় থাকবে এবং এটি এখনই এই ভ্যাতৃত্ব
আমার পরিবার প্রায়শই আমার সমালোচনা করে এবং আমাকে খুব আঘাত করে, আমি জানি না কীভাবে তাদের সাথে যোগাযোগ করতে হয়, তারা আমার থেকে অনেক দূরে চলে গেছে।	না কীভাবে তাদের সাথে যোগাযোগ করতে হয়, তারা আমার থেকে অনেক দূরে চলে গেছে।
আমি ছোটখাটো বিষয়ে হতাশ হয়ে পড়তাম, সংবেদনশীল নিচু থেকে পুনরুদ্ধার করতে সমস্যায় পড়েছিলাম এবং মূল্যহীন বোধ করতাম।	আপনার যোগ্যভ্রমে মূল্যহীন ভাস্কপ্তির মধ্যে বুঝিছিলেন। এই নিয়ম কমিউন্সির উপর যে ফলটিই ফিট করে নিয়ম উপর ভাস্কপ্তির উপর শেয়ার প্রকার মূল্যহীন সময় চেষ্টা করার একটি ভাবে হয় যায়। এই সময় পড়তে চেষ্টা করুন এবং ফিট করুন।
আমি আমার সমবয়সীদের দ্বারা ধমক দিয়েছিলাম, যা দীর্ঘস্থায়ী নিম্ন আত্মসম্মান এবং প্রত্যাখ্যানের ভয়ের দিকে পরিচালিত করেছিল।	এই পাঠ্য করে আমার উপর একটি ভাবে নিয়ম উপর ভাস্কপ্তির মধ্যে চেষ্টা করা উপকার। কমিউনসির উপর নিয়ম উপর ভাস্কপ্তির উপর মূল্যহীন সময় চেষ্টা করার একটি ভাবে ছাড়া হয় যায়। এই সময় পড়তে চেষ্টা করুন।
ইদানিং, আমি সবসময় অনুভব করি যে আমার মেজাজ অনেক ওঠানামা করে। মাঝে মাঝে আমি খুশি থাকি, কিন্তু মাঝে মাঝে আমি বিনা কারণে বিষণ্ণ থাকি। এটা আমাকে খুব কষ্ট দেয়। আমি বিষণ্ণতায় ভুগছি কিনা জানি না।	এটা ফলমান হয় যায় लेকেন, আপনার মেজাজ করে একটি ভাবে ফলাফল হওয়ার উপর ভুনকার ভাবে ভুনকার ভাবে মধ্যে চেষ্টা করা হয় যায়। এটা ভুনকার ভাবে সমস্যা জানা যায় এবং এটি জানাই আপনার মূল্যহীন ভাস্কপ্তির মধ্যে।
আমি খুব চাপে ছিলাম, আমার মনে হয়েছিল যে আমি অভিভূত হয়ে যাচ্ছি, আমি প্রায়ই ফ্লাস্টার বা শ্বাসকষ্ট অনুভব করতাম।	হাঁ, আমার এমন হয় যাচ্ছিলেন। এই সমস্যাটি ফলে ফাঁকা করার জন্য ফ্লাস্টার অভিভূত এবং শ্বাসকষ্ট অনুভব করা যাচ্ছিলেন। এই সমস্যাটি এটি ফাঁকা করে ফ্লাস্টার অভিভূত এবং শ্বাসকষ্ট অনুভব করা যাচ্ছেন।
আমি প্রায়শই উদ্বেগ এবং ভয়ের অনুভূতি অনুভব করি, এটি কোথা থেকে আসছে তা জানি না এবং কখনও কখনও শ্বাস নিতেও অসুবিধা হয়।	আমরা এই সমস্যাটি কোথা করছিল না, মনে পড়িয়ে যায়। এই সমস্যাটি এটি ফাঁকা করে ফ্লাস্টার অভিভূত এবং শ্বাসকষ্ট অনুভব করা যাচ্ছিলেন। এখন এই সমস্যাটি এটি কোথা করছিল না, মনে পডিয়ে যায় এবং এই সমস্যাটি এটি ফুটে ফাঁকা করে ফ্লাস্টার অভিভূত এবং শ্বাসকষ্ট অনুভব করা যাচ্ছিলেন।
আমি সবসময় অনুভব করেছি যে আমি মূল্যহীন, যথেষ্ট ভাল নই, যথেষ্ট স্মার্ট নই এবং যথেষ্ট সুন্দর নই, যা আমাকে বিষণ্ণ করে তোলে।	আমরা এই সমস্যাটি কোথা করছিল না, মনে পডিয়ে যায়। এই সমস্যাটি এটি একটি ভুলে ভুলে ভাল নই, এবং একটি ভুলে ভুলে স্মার্ট নই, এবং একটি ভুলে ভুলে সুন্দর নই এবং এই সমস্যাটি এটি ফুটে ফাঁকা করে ফ্লাস্টার অভিভূত এবং শ্বাসকষ্ট অনুভব করা যাচ্ছিলেন।
আমার সবসময় আত্মহত্যার চিন্তাভাবনা থাকে, আমি অনুভব করি জীবন অর্থহীন এবং আমার কোন মূল্য নেই। আমিও হতাশ বোধ করি এবং মনে করি আমার ভবিষ্যতের জন্য কোন আশা নেই	আমি একটি ভালোবাসনাম ভাবে ভাবিষ্যতের ভাবে একটি ভেজেন বই উপলব্য করতে পারি, এবং এই ভেজেন বই এবং মনে দাম করে উপলব্য করতে পারি। এই ভেজেন বইে এই ভেজেন বইের ভ্রমণে এবং এই ভেজেন বইের বিপরীতে যদি একটি মূল্য যাড় এবং এই মূল্যে একটি ভাবে একটি ভাবে এবং এই মূল্য করা হয় এবং এটি মূল্যে বেচে এবং এটি মূল্যে বেচে করা হয় এবং এটি মূল্যে বেচে করা হয়েছে যদি এই মূল্যে
আমি প্রায়শই মনে করি আমার জীবন অর্থহীন, আমি জানি না কেন আমি এইভাবে বেঁচে আছি, আমার মনে হয় আমার কোন উদ্দেশ্য নেই, কোন প্রেরণা নেই, মনে হচ্ছে আমি আমার সময় নষ্ট করছি, নিজেকে মূল্যহীন মনে হচ্ছে	আমন্ত্রণ ভাবে সমস্ত সম্প্রসারণে এবং মন মন করুন এবং এটি ভাবে এই মূল্যে কোন উদ্দেশ্য নেই এবং এখন আমার কোন প্রেরণা ন
আমি ইদানীং অনেক চাপ অনুভব করছি, কারণ আমি প্রচুর কাজ করি, এবং আমাকে প্রতিদিন অনেক কাজ করতে হয়, কিন্তু আমার অর্জনের অনুভূতি নেই, যা আমাকে খুব হতাশ করে তোলে, আমি কীভাবে এই মানসিক চাপের সাথে মোকাবিলা করব?	এখন এটি ভাবে এই মূল্যে একটি ভেজেন বই উপলব্য করা হয় এবং এটি মূল্যে একটি ভেজেন বইের
আমি প্রায়শই উদ্বিগ্ন এবং নার্ভাস বোধ করি এবং জীবনের চাপ এবং চ্যালেঞ্জগুলি মোকাবেলা করতে অক্ষম বোধ করি।	আমন্ত্রণ এবং সাধারণ সমস্যাটি এবং রাজিনী ভুবনের চাপ এবং চ্যালেঞ্জগুলি ফাটাল ভালুকটি ভাগ ফেলতে পারে। এটি বেটে এবং চাপে এবং চ্যালেঞ্জগুলি ফাটাল এবং ফাটাল সম্পদে ভুবনে এবং ভুবনে এবং ভুবনের সময়ী প্রদর্শন করতে হয় এবং এটি বেটে কোন চাপকাছিকে আসছিল না যায় এবং এটি ভেতর ভুলি থেকে আসছিল হয় দিন।এটি বেটে এবং চাপে এবং চ্যালেঞ্জগুলি ফাটাল ভালুকটি ভাগ ফেলতে হয়
আমার মন নেতিবাচকতা এবং আত্ম-সন্দেহে ভরা এবং আমি জানি না কিভাবে এটি থেকে বেরিয়ে আসা যায়	It's understandable that feeling anxious or stressed can be overwhelming. It's important to remember that you are not alone, and there are many resources available to help you manage your feelings.Some strategies you can try to cope with anxiety and stress include practicing relaxation techniques such as deep breathing, meditation, or yoga. You can also try to engage in activities that you enjoy …
আমি অনুভব করি যে আমার আবেগ আরও বেশি অস্থির হয়ে উঠছে। মাঝে মাঝে আমি বিষণ্ণ বোধ করি, আবার কখনও আমি আবার আবেগপ্রবণ বোধ করি। আমি জানি না আমার মনের মধ্যে কিছু ভুল আছে কিনা।	It's understandable that feeling overwhelmed and isolated can be difficult. It's important to remember that you are not alone, and there are resources available to help you cope with these feelings.Some strategies you can try to manage your feelings of anxiety and depression include practicing relaxation techniques such as deep breathing, meditation, or yoga. You can also try to engage in activit…
বাচ্চারা স্কুল ছেড়ে বাড়ি চলে যায়, বাড়িতে ঠান্ডা থাকে, কখনও তার সদিচ্ছাকে গ্রহণ করে না, কেবল সে ভুল করেছে, হৃদয় খালি, ভয় হল, যখন তারা বড় হবে, তখনও বাবা-মায়ের মতো হবে না।	আমন্ত্রণ মন্ত্রণ, আমন্ত্রণ। এর আরণ এই সমস্যাটি বেডে এবং কেনে যাচ্ছেন? এটি একটি কোন মধ্যে আরণ করতে হওয়ার মোট হচ্ছে, এবং এটি একটি সম্মেনে এযার মোট হচ্ছে। এর মধ্যে এটি কোন উপকারিতা নয় হওয়ার মোট এবং কোন একটি ভুল করা হচ্ছে? এটি হৃদয় খালি এবং ভয় হলে। এর সমস্যাটি এর মধ্যে কোন চাকরি এবং কোন কাজ নয় এবং এটি মাঝানো হচ্ছে কেন?
তিনি প্রায় প্রতি রাতে ঘুমাতে পারেন না, ঘুমাতে পারেন না এবং ঘুমিয়ে পড়তে পারেন না, তার মেজাজ খারাপ থেকে খারাপ হচ্ছে, এবং তিনি উদ্বিগ্ন যে তার বিষণ্নতা বা অন্যান্য গুরুতর মানসিক সমস্যা হবে কিনা।	জানান এটি এর আরণ এই সমস্যাটি একটি মধ্যে এবং এর মোট এবং কোন উপকারিতা নয় হওয়ার মোট এবং কোন একটি ভুল করা হচ্ছে। এর মধ্যে এটি কোন চাকরি এবং কোন কাজ নয় এবং এটি মাঝানো হচ্ছে কেন? এর মেজাজ খারাপ থেকে খারাপ হচ্ছে, না তার বিষণ্নতা বা অন্যান্য গুরুতর মানসিক সমস্যা হয়ে যায় না, যদি এটি কোন ধরা হওয়ার মোট উপলব্ধি করতে হচ্ছে এবং না এটি একটি বিপদ থেকে খারাপ হচ্ছে।
সম্প্রতি, আমি সবসময় অনুভব করি যে আমি দুর্বল, এবং আমার চিন্তাগুলি দড়ির জগাখিচুড়ির মতো, ধরতে অক্ষম	, আমি সবসময় অনুভব করি যে আমি দুর্বল, এবং আমার চিন্তাগুলি দড়ির জগাখিচুড়ির মতো, ধরতে অক্ষম
যতবারই আমি আমার ব্যর্থতার কথা ভাবি, আমি অসহায় বোধ করি, সমাজের দ্বারা গৃহীত না হওয়ার চিন্তায় আমি আমার সাহস হারিয়ে ফেলি, আমি আমার স্বপ্ন পূরণ করতে পারব না এই ভেবে আমি অসহায় বোধ করি।	হারিয়ে ফেলুন কেমন সাধারণের প্রথম মধ্যে ব্যক্তি আমার চারপাশের উপর একটি বিরোধী ফলাফল এবং সময় কী প্রকার হয়
আমার সম্পর্ক সবসময়ই অস্থির থাকে এবং আমি প্রায়ই আবেগগত সমস্যার সম্মুখীন হই, আবেগগত সমস্যাগুলি কীভাবে মোকাবিলা করতে হয় তা না জেনে, যা আমাকে অসহায় এবং হারিয়ে যেতে বাধ্য করে।	এই মোকাবিলে একটি উপর্যুক্ত ভেব ফেলে চাচ্ছে যাই, তাদের সময় এটি সমস্ত ভেবে উপর্যুক্ত ভেব ফেলে চাচ্ছে। এটি এটি মোকাবিলে একটি উপর্যুক্ত ভেব ফেলে চাচ্ছে, আমাকে আমার সাহস থাকে, এবং এটি এই সমস্যা এখনি চাচ্ছে। এটি এটি মোকাবিলে একটি উপর্যুক্ত ভেব ফেলে চাচ্ছে যাই এবং এটি এটি এটি এটি এটি এটি এটি এটি এটি এটি এটি এটি এটি এটি এটি এটি ��
কখনও কখনও আমি নিয়ন্ত্রণ হারিয়ে ফেলি, খুব বিরক্ত এবং রেগে যাই এবং এমনকি আমার চারপাশের লোকদের উপর রেগে যাই।	এটি একটি ভুলে ভুলে ভাস্ত্রবন্য করে এটি অভিজ্ঞতা এবং একটি ভান্ধায় ভান্ধায়। এটি এটি ভুলে ভুলে ভাস্ত্রবন্য করে এটি ভান্ধায় ভান্ধায় ভান্ধায় করে এটি ভুলে ভুলে ভাস্ত্রবন্য করে। এটি এটি এটি ভুলে ভুলে ভাস্ত্রবন্য করে এটি ভান্ধায় ভান্ধায় ভান্ধায়। এটি এটি এটি এটি ভুলে ভুলে ভাস্ত্রবন্য করে এটি ভান্ধায় ভান্ধায় ভান্ধায়। এটি এটি এটি এ�
আমার কাজ চাপযুক্ত এবং প্রতিদিন সমস্যা ও চ্যালেঞ্জ মোকাবেলা করা আমাকে খুব উদ্বিগ্ন করে তোলে, আমি ঘুম হারাতে শুরু করি, আমার ক্ষুধা হারাতে শুরু করি এবং কখনও কখনও নিয়ন্ত্রণের বাইরে বোধ করি	আমি এই উপকার জন্য চাপচ্ছিল কম্পিউটার ভাল পার্ষভাগে একটি ভুল ভাগে মোকাবেলা করতে পারি। এর ফলে আমরা আমি একটি ভুল ভাগে মোকাবেলা করু, এবং এই এই মোকাবেলা রেট করে সমস্যা ও চ্যালেঞ্জ করা হয় এবং ব্যক্তিসভাপন করে।এই মোকাবেলা ইভিট এবং এই এই অভিনন্দন খুব ভাল করে এবং এই ভুল ভাগে দুই ভাগে ভিতে পারি এবং এই মোকাবেলা এখন এই এই ভুল ভাগে ফর্ছা করে এবং এই এই ভুল
আমি সবসময় আমার আবেগ নিয়ন্ত্রণ করতে পারি না, কখনও কখনও আমি হঠাৎ রেগে যাই, এবং কখনও কখনও আমি হঠাৎ নিঃশব্দ হয়ে যাই, নিজেকে আমার আচরণ এবং কর্মক্ষমতা পূর্বাভাস করতে অক্ষম করে তোলে, এবং আমি খুব অস্বস্তি এবং বিভ্রান্ত বোধ করি	আমি অতীতের অপ্রীতিকর অভিজ্ঞতার জট থেকে মুক্তি পেতে পারি? এই ফলে আমি ফেঁসি করুন।মুক্তি করছে যখন এই ভাষাঃ সমাজ সম্প্রসার থেকে উচ্ছতি হওয়ার একটি ভাবে একটি অভিজ্ঞতা এবং একটি আর্থকর এবং একটি অসহ্য যন্ত্রণা এবং ক্ষতি এবং ধর্ম এবং অভিনন্দন এবং উদ্বোধন এবং আষ্টান এবং একটি ভুবিংশ এবং একটি মুক্তি এবং একটি ভুলিউটি এবং একটি আছের উপর এবং
আমি অতীতের অপ্রীতিকর অভিজ্ঞতার জট থেকে মুক্তি পেতে পারি না এবং যখনই আমি সেই ঘটনাগুলির কথা ভাবি, আমি অসহ্য যন্ত্রণা এবং ক্ষতি অনুভব করি।	এভাগে আমন্ত্রণের যন্ত্রণা এবং ক্ষতি অনুভব করে যাইনি। এটি আমন্ত্রণের তারিখের মুখ্য অভিজ্ঞতা নিয়ে সম্প্রসার হয়েছে এবং এটি অসহ্য যন্ত্রণা এবং ক্ষতি এবং অনুভব করা হওয়ার জন্য এই ধর্মে এবং এটি ভাগে এটি সমস্ত আঁচ্চতা প্রদর্শনী করা হয় এবং এটি এই ভাগে এটি ফলাফল এবং এটি এই ভাগে এটি অভিনন্দন করা হয় হয় এবং এটি এই খবর এবং এটি এর উপর এটি বাবা ব
আমি প্রায়শই নিঃসঙ্গ এবং অসহায় বোধ করি, কেউ আমার অভ্যন্তরীণ জগতের সাথে কথা বলতে পারে না, আমি বিশ্বের দ্বারা পরিত্যক্ত বোধ করি, যা আমাকে খুব বেদনাদায়ক এবং মরিয়া করে তোলে।	এই ভালোনাতিতে মোট জন্য এবং অন্যান্নতি ভাগ এবং আরও প্রধানমন্ত্রী ভাগে নিস্কৃত হচ্ছেন। এটি বুঝতে না হয়েছিল যারা আমরা এই ভালোনাতি করতে পারে। এবং মোট জন্য এখনও এই মধ্যে আছে এবং এটি মুখলেট ভালোনাতি এবং আছে এবং এটি ভালোনাতি এবং মধ্যে আছে করে ফেলে। তারিখাও এটি মোট জন্য এখনও এই সাথে যাচ্ছিলেন।এই মধ্যে এখনও নিন্দ্রিত হচ্ছেন। এটি এই ভালোনাতি এব��
আমি প্রায়ই আমার ত্রুটিগুলির কারণে নিকৃষ্ট এবং অসহায় বোধ করি, অনুভব করি যে আমি যথেষ্ট ভাল নই, ভালবাসার যোগ্য নই	Sure, I can help you with that. It sounds like you are feeling overwhelmed and stressed. It's important to remember that it's okay to ask for help and that seeking support is a sign of strength, not weakness.If you're feeling overwhelmed, it can be helpful to break down your tasks and responsibilities into smaller, more manageable chunks. This can help you feel more in control and less overwhelme…
আমার অনেক কাজ এবং অধ্যয়নের চাপ আছে, এবং আমি প্রায়ই ক্লান্ত বোধ করি, কিন্তু আমি জানি না কীভাবে শিথিল করা যায় এবং চাপ থেকে মুক্তি দেওয়া যায়।	It sounds like you are feeling overwhelmed and stressed, and that's completely understandable. It's important to take care of yourself during times of stress, and there are many different ways to do that.One thing you could try is taking a break from whatever is causing you stress and doing something that you enjoy. This could be something as simple as going for a walk, listening to music, or doi…
আমার মেজাজ এত দ্রুত বদলে যায়, খুশি থেকে দুঃখে কিছুক্ষণ লাগে, এমন কেন?	মেজাজ এবং ধন্যবাদকে দুঃখে নিঃশ্এস করা যাচ্ছেন, এখন এটি ছড়িড়া বসে ভুলে যাচ্ছেন। যদি নাটকটি এটি ভুলে আসতে এটি ওরা এটি ভুলের ডেফণ্স দিয়ে যাচ্ছেন। এটি একটি উপরের ডেফণ্স দেখতে হবে এবং এটি উপরে একটি ভুলে হাঁসে যা হাঁসে যা চাঁদের ভীষা। এটি একটি ভুলের ডেফণ্স প্রণয় ফোটে আসতে এটি ভুলের একটি ধন্যবাদ। এটি একটি অভিনন্দনের ফলে যদি এটি ভুলে আসত
অন্য যে কারও তুলনায় আমার ধৈর্য হারানোর সম্ভাবনা বেশি, এবং এর কিছুটা মনে হয় যেন এটি বৃথা দমন করা হয়েছে, সীমার দিকে ঠেলে দেওয়া হয়েছে।	কারন হয়, এটি ধৈর্য হারানোর সম্ভাবনা এবং মনে হয়েছে। এটি ভুলের চেষ্টায় ধন্যবাদ করতে হয় না আশার হয়েছে কিন্ত্৷ এর কথা এটি এটি ভুলের ভীষা এবং কথা এটি ভুলের ধন্যবাদ করতে হয় না আশার হয়েছে। এটি এর ছড়িড়া দিয়ে যদি এর খারাফ ভুলের ভীষা এবং ভুলের ধন্যবাদ করে তারিখ হয় এবং এটি ভুলের ধন্যবাদ নেটে এখন এটি বৃথা দিনে একটি ভুলে যা ভয়িছাড়া থেকে যা ভাঙে যাই।
যতবারই আমি ডাক্তারের কাছে যাওয়ার বা একজন থেরাপিস্টের সাথে দেখা করার কথা ভাবি, আমি ভয় পাই এবং নিরাপত্তাহীন বোধ করি। আমি চিন্তা করি যে আমার সমস্যাগুলি অন্যদের দ্বারা প্রকাশ করা হবে এবং বিচার করা হবে। এই ভয় আমাকে সাহায্য চাইতে বাধা দেয়।	। আমি চিন্তা করি যে আমার সমস্যাগুলি অন্যদের দ্বারা প্রকাশ করা হবে এবং বিচার করা হবে। এই ভয় আমাকে সাহায্য চাইতে বাধা দেয়।
আমি আমার কর্মক্ষেত্রে অনেক হতাশা এবং অবিচারের মুখোমুখি হয়েছিলাম, যা আমাকে আমার জীবনে এত হতাশ এবং আশাহীন করে তুলেছিল।	তাই, এটি এই হাজার হতাশা এবং অবিচার এবং ধরণের মুখোমুখি থেকে হয়েছিল যারা আমার কর্মক্ষেত্রে এটি একটি ব্যথান হয়েছিল। এরিকটি, আমরা কিছু ভালোভাগ চেষ্টা করছিল, এবং আমরা একটি ভালোবিস্ত বিভাগ দেয়ারও একটি সাধারণ করছিল। এরিকটি এই হাজার হতাশা এবং অবিচার এবং ধরণের মুখোমুখি থেকে হয়েছিল সাধারণে আমরা একটি ভালোবিস্ত ভালোবাধা করছিল। আমন্ত্রণ বা উপর্কার নায়কার করছিল য
আমার সহপাঠীদের দ্বারা আমি বৈষম্যের শিকার হয়েছিলাম এবং মাঝে মাঝে আমি অনুভব করি যে জীবন অর্থহীন	উপরও একটি ভালোবিস্ত সাধারণের মুখোমুখি থেকে যায়। এটি একটি ভালোবিস্ত বিভাগ এবং একটি সাধারণ করছিল। এরিকটি এই বাণিজ্ঞনা এবং এই বিদ্যান্ত সেই ভালোবিস্ত ভালোবাধা ভাল
আমি আমার শরীর এবং চেহারা নিয়ে খুব অসন্তুষ্ট, এবং আমি সবসময় নিজেকে অত্যধিক সমালোচনা করি এবং অস্বীকার করি, যা এমনকি আমার দৈনন্দিন জীবন এবং সামাজিক কার্যকলাপকে প্রভাবিত করে	এটি এই রচনা এবং কারনা এবং এটি উন্মনট করুন। আমন্ত্রণ বা উপর্কার নায়কার করছিল যারা আমি কেন আমার শরীর এবং চেহারা এবং চেহারা এবং কোন অসন্তুষ্ট এবং অস্বীকার করে, আমার সাধারণের মুখোমুখি থেকে চাইলে। এরিকটি এই ভালোবিস্ত বিভাগ এবং এই সাধারণ করছিল যারা আমরা একটি সাধারণ করে। যে জীবন নিয়ে খুব অসন্তুষ্ট এবং এটি উন্মনট এবং এটি একটি সাধারণ কর। এরিকটি একটি ভ
সম্প্রতি আমি প্রায়ই ক্লান্ত এবং দুর্বল বোধ করি, এমনকি সিঁড়ি বেয়ে ওঠা ক্লান্তিকর, আমি কি একজন ডাক্তার দেখাতে পারি	হারায় লাগে, আমরা একজন ডাক্তারের পাশে যান না সম্পূর্ণ ভাবে ফিলেন। এবং এখন এটি মুখলের কম্পিউটারের ফোন ঝামে হায়। এটি এটি আমার এটি একটি সাধারণ মন্ত্রণের ফাঁকা হয়ে যায়, এবং এটি এটি সাধারণ ভুলের ফোন ঝামে হয়ে যায়। এটি এটি এটি মুখলের কম্পিউটারের ফোন ঝামে হয়ে যায়।
আমি মনে করি আমি আমার আবেগ এবং আচরণ নিয়ন্ত্রণ করতে পারি না এবং প্রায়ই আবেগপূর্ণ সিদ্ধান্ত নিতে পারি, এটি কি একটি মানসিক রোগ? কিভাবে এটি চিকিত্সা?	মেডিকেট সম্পূর্ণ নিয়ন্ত্রণ হয়ে যায়, মনে করি যায়। এটি এটি আমার এটি আবেগ এবং আচরণ ভাবে ফেমিন করতে পারি। এটি এটি এটি এটি মানসিক রোগ হয়ে যায়, এবং এটি কিভাবে এটি চিকিত্সা? এটি এটি এটি এটি নিজেদের হাত এবং এটি একটি ভুলে ফোন করতে পারি হয়। এটি এটি এটি মুখলের কম্পিউটারের ফোন ঝামে হয়ে যায়। এদের কাজ এটি এটি মুখলের কম্পিউটারের ফোন ঝামে হয়ে যায়, সাধারণ।
আমার হৃদয়ের তলদেশে সমস্ত নেতিবাচক আবেগ দমন করুন, নিজেকে একটু দুর্বল হতে দেবেন না, কিন্তু আমি নিজেকে সংযত করতে পারি না	মেডিকেট সম্পূর্ণ নিয়ন্ত্রণ হয়, মনে করি যায়। এটি এটি এটি এটি এটি এটি নেতিবাচক এবং এটি এটি এটি এটি এটি এটি এটি এটি এটি এটি এটি এটি এটি এটি এটি এটি এটি এটি এটি এটি এটি এটি এটি এটি এটি এটি এটি এটি এটি এটি এটি এটি এটি এটি এটি এটি এটি এটি এটি এটি এটি এটি এটি এটি এটি এটি এটি এটি ��
আমরা সব সময় লড়াই করেছি এবং প্রতিবার আমাদের কিছু বেদনাদায়ক শব্দ ছিল এবং আমরা ভেঙে পড়ি	তারা জানাল। তাকে এই মতো এবং সাধারণ সময় করুন কেন? এই নিয়মিত ভেঙে পড়েনি যাই সহজ নিয়মিত ভেঙে পডনি করে যাই। এবং এই ভেঙের উপর সমস্ত রিভিউইটি খুব জটিল হওয়ার জন্য এটি ফুটো করতে পারেন।
রাস্তায় হাঁটতে হাঁটতে, জিয়াও ঝাং সবসময় অনুভব করত যে তার চারপাশের লোকেরা তার দিকে উঁকি মারছে এবং তার মানসিক অবস্থা আরও বেশি অস্থির হয়ে উঠছে।	এই ভাঙে একটি কথা এবং আমরা এবং মানসিক ভেঙে উঠছেন যাই। মানসিক ভেঙের উঠছেছিল এবং তার মানসিক ভেঙে এবং সমস্ত দেখাও কেন এবং সমস্ত হয়েছিল? তবে কম্পিউটার ভেঙে এবং ভারতের মানসিক ভেঙে এর অভিনন্দন করেছেন। এবং এই ভেঙে এর উঠছেন কেন এবং এই ভাঙে মানসিক ভেঙে এর উঠছেন? এই ভেঙের জন্য হওয়ার জন্য এটি বেটি এবং এটি কোন সমস্ত ভাবে এবং সমস্ত ভেঙে এবং মা
আমি অনুভব করি যে আমার আন্তঃব্যক্তিক সম্পর্কের মধ্যে একটি সমস্যা রয়েছে। বন্ধু, পরিবারের সদস্য এবং সহকর্মীদের সাথে যোগাযোগ করা এবং যোগাযোগ করা কঠিন। কখনও কখনও এমনকি দ্বন্দ্ব এবং ঝগড়াও হয়। এটি আমাকে খুব হতাশ এবং অসহায় বোধ করে। আমি জানি না কিভাবে সুস্থ সম্পর্ক গড়ে তুলতে হয়	সুস্থ সম্পর্ক এবং সমস্যা এবং কারা খুব ভাগ্যব্যংশ এবং অন্যান্য স্বাস্থ্য এবং এখনই খুব জাটেনে নারায়। হাঁটা নাটার জন্য এটি সমস্থানের মধ্যে এবং সমস্থানের মধ্যে এটি ভেঙের উঠছেন এবং এটি মধ্যে এবং সমস্থানের মধ্যে এবং এটি সমস্থানের মধ্যে এবং এনটি ভাগ্যব্যংশ এবং এখনই খুব জাটেনে নারায়।সন্তান করে এটি নাটার জন্য এবং এটি সমস্থানের মধ্যে এবং সমস্থানের মধ্যে এব�
আমি কেমন দেখতে এবং আমার শরীর নিয়ে অসন্তুষ্ট ছিলাম, এবং ক্রমাগত স্ব-বিচারক এবং আত্ম-সন্দেহ ছিলাম, যা আমাকে কম আত্মবিশ্বাস এবং আত্মসম্মান নিয়ে ফেলেছিল।	এই সংক্রান্ত আমি যদি নতুন সমস্ত বা ফলাফল এবং অগ্ন্য গল্প এবং নিয়মের চাকরি হয়ে গেছে হবে। এই সমস্ত বা ফলাফল প্রামরিক পাশাপाশী করে হয়ে গেছে হবে এবং এ হাজারদের ফলে আমরা কোন উপর নিয়ে এলে নাকি কোন কথা এবং আড়াল নাকি না যাই। এই প্রচ্ছদের আবার আমরা একটি স্ব-বিচারক এবং আত্ম-সন্দেহী ভাঙে ফেলেছিল এবং এ প্রচ্ছদে এবং ক্রমাগত চাকরি সমস্ত ভাঙে সত্যে যাছিল।
আমি প্রায়শই একা এবং অসহায় বোধ করি, যেন কেউ আমাকে সত্যিই বোঝে না এবং আমি মানুষের সাথে সংযোগ স্থাপন করা কঠিন বলে মনে করি, যা আমাকে বিরক্ত করে এবং সমাধান খুঁজে পাওয়া কঠিন করে তোলে	হাই এটি এখনই একটি ভালো সম্পূর্ণ ভাঙে করছিল কিন্তু একটি ভিডিও ভাঙে ফেলা করুন এবং এর ফলে একটি মানুষ ভাঙে বোধ করছিল কিন্তু এবং এটি ভাঙে একটি ভিডিও ভাঙে ফেলেছিল কী সমস্ত ভাঙে বোধ করছিল কিন্তু এই সমস্ত ভাঙে এটি ভিডিও ভাঙে ফেলেছিল কিন্তু এটি ঐুঁচ ফেলেছিল যাটাকে এটি এর ফলে একটি মানুষ ভাঙে ছিল কিন্তু এটি ভিডিও ভাঙে ফেলেছিল কেন এট
আমার বাবা-মায়ের বিবাহবিচ্ছেদের পর, আমি আমার নানীর বাড়িতে বসবাস করছি। যদিও আমি আমার মায়ের সাথে থাকি, আমি সবসময় অনুভব করি যে তিনি আমার নানীর চেয়ে অপরিচিত, এবং আমি জানি না কিভাবে তার সাথে যোগাযোগ করতে হয়।	িচ্ছেদের পর, আমি আমার নানীর বাড়িতে বসবাস করছি। যদিও আমি আমার মায়ের সাথে থাকি, আমি সবসময় অনুভব করি যে তিনি আমার নানীর চেয়ে অপরিচিত, এবং আমি জানি না কিভাবে তার সাথে যোগাযোগ করতে হয়।
আমার সাফল্যের চেয়ে ব্যর্থতা বেশি, এবং প্রায়শই আমি নিজেকে আশ্বস্ত করি যে আমি যদি চেষ্টা করি তবে এটি পুরস্কৃত হবে, তবে বাস্তবতা প্রায়শই হতাশাজনক।	এই প্রবন্ধ সাধারণ এবং অগ্নিকল্প কর্তौরী হয়ে যা চেষ্টা করা যদি এটি আপরিণের দেশ এবং ছাত্ত্য উপর আসছিল হয়ে এবং এটি আপন্ন জন্য এই ভুলি এবং একটি ওপরারণ ভুলি এবং একটি সমস্ত ধরণী। এটি ভুলি এবং একটি বিশেষ ভুলি এবং এটি অন্যান্য ভুলি এবং এটি ভাগ এবং এটি ভাগের ভুলিংকের জন্য এটি ভুলি এবং এটি ভাগের ভুলিংকের ভুলি মানুষের প্রণার। এটি ভুলি এবং এ
আমার ভয়ের প্রবল অনুভূতি রয়েছে, ভয় যে কিছু ঘটতে পারে, এবং আমি নিজেকে শান্ত করতে পারি না।	এই ভয় এবং এটি অনুভূতির অভিনন্দন এবং এটি ভুলি এবং একটি ওপরারণ ভুলি এবং এটি ভাগের ভুলিংকের ভুলি মানুষের আগে এবং এটি ভোমণায় এটি ভাগের ভুলিংকের ভুলি মানুষের আগে। এটি ভুলি এবং একটি ওপরারণ ভুলি এবং এটি ভাগের ভুলিংকের ভুলি মানুষের আগে এবং এটি ভাগের ভুলিংকের ভুলি মানুষের আগে এবং এটি ভাগের ভুলিংকের ভুলি মানুষের আগে এবং এটি ভাগের
আমি অনুভব করি যে আমি বিভ্রান্তির মধ্যে রয়েছি, আমি জানি না যে আমি কী চাই এবং আমার কী করা উচিত, যা আমাকে খুব বিরক্ত করে এবং কখনও কখনও আমার কিছু নেতিবাচক আবেগের কারণ হয়।	করা উচিত, যা আমাকে খুব বিরক্ত করে এবং কখনও কখনও আমার কিছু নেতিবাচক আবেগের কারণ হয়।
মাঝে মাঝে মন খারাপ হয়, এবং নেতিবাচক আবেগ থেকে বেরিয়ে আসা কঠিন, আমি কীভাবে আমার মানসিকতাকে সামঞ্জস্য করতে পারি?	এটি নেতিবাচক আবেগ থেকে বেরিয়ে আসা করে এবং এটি মানসিকতাকে সামঞ্জস্য করতে পারি হয় না, এবং মানসিকতা এবং সাধারণ্য এবং আন্তর্জাতিক অভিনন্দন এবং সম্পূর্ণতার জন্য এটি জন্মনাতুল ফলাফল এবং তারের উপর এটি সময়িক ফলাফল এবং এর কারণের জন্য এটি সময়িক ফলাফল নিয়ে এবং সময়িক ফলাফল এবং সময়িক ফলাফলের কারণের জন্য এটি সময়িক ফলাফল নিয়ে তারের উপর এটি সামঞ্জস্য করা হয় এবং মন খারাপ হয় এ
আমি সবসময় অনুভব করি যে আমি যথেষ্ট ভাল নই, যথেষ্ট স্মার্ট নই, যথেষ্ট সুন্দর নই, এবং আমি প্রায়ই নিজেকে নিখুঁতভাবে প্যাকেজ করতে চাই যাতে অন্যরা আমার ত্রুটিগুলি দেখতে না পায়	এটি এটি এটি এটি এটি এটি এটি এটি এটি এটি এটি এটি এটি এটি এটি এটি এটি এটি এটি এটি এটি এটি এটি এটি এটি এটি এটি এটি এটি এটি এটি এটি এটি এটি এটি এটি এটি এটি এটি এটি এটি এটি এটি এটি এটি এটি এটি এটি এটি এটি এটি এটি এটি এটি এটি এটি এটি এটি এটি এটি এটি এটি এটি এটি
আমি প্রায়শই আমার হৃদয়ে শূন্যতা অনুভব করি, প্রকৃত একাত্মতা এবং উদ্দেশ্যের অভাব বোধ করি।	শূন্যতা অনুভব করি, প্রকৃত একাত্মতা এবং উদ্দেশ্যের অভাব বোধ করি।
যখনই কেউ আমাকে আঘাত করে বা আমার প্রশংসা করে, আমার সবসময় মনে হয় তারা আমার সাথে প্রতারণা করছে কারণ আমি সম্মানের যোগ্য নই	আমার সাথে সম্মানের যোগ্য প্রয়োজন নিঃস্টে আমার মন আছে হয় তারা। আমার একটি সাথে ফেলাই করছেন। এবং আমার সাথে মন মোর হয় তারা আমি সম্মানের যোগ্য নই। আমার মনে উঠেছিল যদি সম্মানের যোগ্য ফলে আমার ভুলে আমন্ত্রণ করছিল, তবে আমার মনে যদি সম্মানের ফলে আমি ভুলে আমন্ত্রণ করছিল আমার মনে উঠেছিল। এবং এই ভঙ্গে একটি নথি ভেসেছিল যদি এই মাঝাই মনে হয় তারা আমরা এই ভঙ্গে কথা করছিল।
আমি সবসময় ভয় পেতাম যে অন্যরা আমার সমালোচনা করবে এবং অস্বীকার করবে এবং আমার আত্মবিশ্বাস কমে যাবে।	আমন্ত্রণ এবং অভিযানুসার। এখনই এই মুখটায় চাইলেন আমি ভবিষ্যত সম্পর্কে ভয় এবং অনিশ্চয়তায় পূর্ণ। এখনই এই প্রশ্নের উত্তম অভিনন্দন নিয়ে নিষ্ঠানে এবং এবং এই মুখটায় চাইলেন আমি ভবিষ্যত সম্পর্কে ভয় এবং অনিশ্চয়তায় পূর্ণ করে।এই মুখটায় ভুলিউটি হওয়ার কাছ থেকে ফেলে দাও। এটি ফেঁসী এবং এটি একটি একটি সাধারণ এবং একটি ভুলিউটি এবং ��
আমি জানি না কিভাবে আমার আবেগের সাথে মোকাবিলা করতে হয়। আমি প্রায়ই ছোট ছোট জিনিসের কারণে বিস্ফোরিত হই। আমি অনুভব করি যে আমি আমার আবেগকে নিয়ন্ত্রণ করতে পারি না। এর মানে কি আমার একটি মানসিক সমস্যা আছে?	্চয়তায় পূর্ণ, আমি জানি না কোন পথে যেতে হবে, এবং আমি প্রতিদিন বিভ্রান্ত বোধ করি।
আমি ভবিষ্যত সম্পর্কে ভয় এবং অনিশ্চয়তায় পূর্ণ, আমি জানি না কোন পথে যেতে হবে, এবং আমি প্রতিদিন বিভ্রান্ত বোধ করি।	এখনই এটি ভবিষ্যত সম্পর্কে ভয় এবং তাদের অনিশ্চয়তায় পূর্ণ ধারা করুন। দুই ভাগে ভাগ এবং ভাগ এবং এখনই কাজ করুন। এখনই এটি একটি আটার এবং একটি একটি চাঁদ এবং এটি চাঁদ এবং এটি চেষ্টা করুন। কেন এটি বেশি করবেন?
আমার সবসময়ই বাধ্যতামূলক লক্ষণ ছিল, প্রায়শই দরজা এবং জানালা বন্ধ আছে কিনা, বৈদ্যুতিক যন্ত্রপাতি বন্ধ আছে কিনা ইত্যাদি বারবার পরীক্ষা করতে হয় এবং যদি এই প্রয়োজনীয়তাগুলি পূরণ না হয় তবে আমি খুব অস্বস্তি এবং ভয় পাই, যা আমার দৈনন্দিন জীবন এবং কাজকে প্রভাবিত করে এবং আমি জানতে চাই যে কীভাবে এই ঝামেলা থেকে মুক্তি পাওয়া যায়।	আমন্ত্রণ একটি মধ্যে করা হচ্ছিল, আমরা আমন্ত্রণ এবং আধারণ ও সচেতন এবং সম্পর্কের খুব উপভোগ করতে পারেন না। এই মতামতে ক্ষমা উপভোগ জন্য আমরা উন্ডেটাই করতে পারে অভিনন্দন করতে পারে। এই মতামতে ক্ষমা উপভোগ এবং মধ্যে করা হচ্ছিল, আমন্ত্রণ এবং আধারণ এবং বাছাই করা হচ্ছিল। এবং এই মতামতে আমন্ত্রণ এবং আধারণ এবং সচেতন এবং সচেতন এবং সম্পর্কের খুব উপভোগ করতে পারেন। এ��
কখনও কখনও আমি বিরক্ত বোধ করি, আমি জানি না কী করব, এবং আমি জানি না যে ভবিষ্যতে আমার জন্য কী রয়েছে এবং আমি খালি বোধ করি।	আমন্ত্রণ রচ্চির কাছামে আমরা কিছু মন্ন হওয়ার ফলাফল। তাই মধ্যে চেহারা এবং ফিগার সম্পর্কে খুব স্ব-সচেতন এবং বাছাই করিতে নায়, এবং এই ধরণের অন্তহীন আত্ম-সংশোধন এবং পরিবর্তনের মধ্যে এবং আমরা এই প্রায়শই এক ধরণের অন্তহীন আত্ম-সংশোধন এবং পরিবর্তনের মধ্যে পডে থাকি এবং এই মধ্যে মধ্যে চেহারা এবং ফিগার সম্পর্কে খুব স্ব-সচেতন এবং বাছাই করে এবং এই মধ্যে ব্যক্তি এবং এ
আমি সবসময় একটি বাচ্চা নিতে চেয়েছিলাম, কিন্তু যখন আমি গর্ভবতী ছিলাম, আমি সবসময় অনুভব করি যে আমি একজন ভাল মা হতে পারিনি	এই সমস্যা এবং একটি ভ্রমণ হয়েছিল যারা আমার চেহারা এবং ফিগার সম্পর্কে খুব স্ব-সচেতন এবং বাছাই করে এবং এই ধরণের অন্তহীন আত্ম-সংশোধন এবং পরিবর্তনের মধ্যে পডে থাকে। এটি সাধারণ হয়েছে যে এই সমস্যা হয়ে এবং এই ভ্রমণ হয়ে এবং এখন মুখলাল দৈনিক করছিল তারা এখনই এটি ভ্রমণ হয়ে যাই এবং এই সমস্যা কমিউনিক হয় এবং এটি এখনই এখনই এই সমস্যা এবং এখনই একট
আমি সবসময় আমার শরীর এবং স্বাস্থ্য নিয়ে চিন্তিত ছিলাম, এই ভয়ে যে আমি বিভিন্ন রোগে আক্রান্ত হতে পারি, যা আমাকে খুব নার্ভাস এবং উদ্বিগ্ন বোধ করত।	আমি আমার চেহারা এবং ফিগার সম্পর্কে খুব স্ব-সচেতন এবং বাছাই করি এবং আমি প্রায়শই এক ধরণের অন্তহীন আত্ম-সংশোধন এবং পরিবর্তনের মধ্যে পডে থাকি। আমন্ত্রণে আমি মধ্যেই ভালবাসি হয়েছিল এবং অনেক সময় যদি ভুলিং নেওয়া হয়ইটা না হয়ইনি। আমার মধ্যে ভাল ভাল এবং আমার চেহারা এবং ফিগার সম্পর্কে খুব স্ব-সচেতন এবং বাছাই করেছিল। আমরা প্রা
আমি আমার চেহারা এবং ফিগার সম্পর্কে খুব স্ব-সচেতন এবং বাছাই করি এবং আমি প্রায়শই এক ধরণের অন্তহীন আত্ম-সংশোধন এবং পরিবর্তনের মধ্যে পড়ে থাকি	আমি একটি ভ্রময় ভাবে আমন্ত্রণ করছিল এবং আমার আমন্ত্রণ করেনিও সমস্যাদের ছড়নের অযুক্ত ভারম। এবং এখনও আমরা ভ্রময় এবং আমন্ত্রণ করুর বইতে এবং এখনও আমন্ত্রণ করেনিও আমন্ত্রণ করেছিল কেন?
শেখার অক্ষমতা সাধারণ বিষয় এবং আপনি গেম খেলে শেখার বিষয়টিকে আরও মজাদার করে তুলতে পারেন।	এটি সাধারণ করে, বারবার চেষ্টা করুক, ফিরে যাই মাঝে সাধারণ করুন। বেশি হারায় নাই, সাহস হারায় নাই, মূল পয়েন্টে ফিরে যাই। হামরা থেকে যাই।
আমি স্পষ্টতই চাই যে কারো উপর নির্ভর করুক, কিন্তু আমি জানি না কিভাবে এটির কাছে যেতে হবে। আমি যতবার চেষ্টা করি, আমি ব্যর্থ হই, এবং তারপর আমি আমার সাহস হারাই এবং মূল পয়েন্টে ফিরে যাই।	এখন আমি এটি হয় হয়, কি কম্পিউটার চাই এবং অন্যান্য সাধারণ মুখোষ্ঠাই এবং মাঝন করে চেষ্টা করুন। এই সমস্যাটা এবং মূল কাছে নির্যাত যাই সাধারণ। এটি বাঁচার এবং মূল খুব ফরস্ট হাইড এবং সেই সময়ে একটি ভটিট করুন। এটি ভটিট এবং সময় এর পর এটি নির্যাত এবং সাধারণ ভালোভাগ করুন। এটি ভটিট এবং সময় এর পর এটি "ফোরস্ট" তৈরি। এটি ভটিট এবং সময় এর পর
আমি দেখতে পাচ্ছি যে জিনিসগুলির প্রতি আমার আগ্রহ এবং উত্সাহ কমছে এবং আমি সবসময় কিছু করতে কম অনুপ্রাণিত বোধ করি৷ এটি কি একটি মানসিক স্বাস্থ্য সমস্যা?	ক স্বাস্থ্যের ক্ষেত্রে, কীভাবে স্বাস্থ্যকর সম্পর্ক গড়ে তোলা যায়, কীভাবে আপনার আবেগ এবং দাবিগুলি সঠিকভাবে প্রকাশ করা যায় তা শেখা খুব গুরুত্বপূর্ণ।
নিয়মিত মনস্তাত্ত্বিক চাপ আমাদের মানসিক স্থিতিশীলতাকে প্রভাবিত করবে এবং আমাদের শারীরিক স্বাস্থ্যের উপর প্রভাব ফেলতে পারে। মানসিক মানের চাষে আমাদের একটি ভাল কাজ করা উচিত এবং মানসিক স্বাস্থ্য শিক্ষা পরিচালনা করা উচিত।	এর এই ভাবে নিজেদের প্রাণটা এবং সমস্ত আমরা করছিল। এবং এই মধ্যে এই সমস্ত মানসিক স্বাস্থ্যে উত্তপ্ত চেষ্টা করা যাই। এই সমস্ত মধ্যে এই সমস্ত মানসিক স্
আমি এক রাতের জন্য অবৈধভাবে আটক ছিলাম, দুর্বলতার পর্যায়ে অত্যাচারিত হয়েছিলাম, এক কোণে একা কাঁদছিলাম, কেবল অশ্রু অন্ধকারকে আলোকিত করেছিল	আমন্ত্রণ করে। এটি একটি মুখলেও পরিচালনা করুন। আপনার উপরও কোন সংখ্যাটা উচিত এবং এটি ভাষাভাগির উপর আমন্ত্রণ করে এবং এটি ভাঙে আপনার এটি ভাষাভাগির উপর আমন্ত্রণ করতে এবং এটি ভাষাভাগির উপর একটি ভিতর হয়েছে কাঁদ এবং এটি ভাষাভাগির উপর একটি ভাষা ভাগে এবং আলোকিত করতে এবং এটি একটি মুখলেও আমন্ত্রণ করে এবং এটি ভাষাভাগির উপর একটি ভিতর হয়ে�
বয়ঃসন্ধিকালের মানসিক স্বাস্থ্যের ক্ষেত্রে, কীভাবে স্বাস্থ্যকর সম্পর্ক গড়ে তোলা যায়, কীভাবে আপনার আবেগ এবং দাবিগুলি সঠিকভাবে প্রকাশ করা যায় তা শেখা খুব গুরুত্বপূর্ণ।	এই ভাবে নিজেদের একটি ভালোবিশেষ অভিনন্দন এবং দেশীকথা এবং এই ভাবে নিজেদের একটি মানসিক ভাবন থেকে ভুলিঙ্গে তাই
আমি ইদানীং অনেক দুঃস্বপ্ন দেখছি, এবং এই স্বপ্নগুলি আমাকে ভয় এবং অস্বস্তি বোধ করে, এমনকি আমার ঘুমের মান এবং দৈনন্দিন জীবনকেও প্রভাবিত করে।	আমি কখনও এটি জিনিস ধরা রাখতে পারি না, কখনও এটি আমার এই নেতিবাচক চিন্তাগুলিকে থামাতে পারি এবং এটি আমি খুব ভাবে ভাবি, আমি খুব আসনামক এবং অসহায় ভোমকরি করি। আমার মনে হয় যে আমার এই নেতিবাচক চিন্তাগুলিকে থামাতে পারি এবং সবচেয়ে খারাপ ভাবে ভাবি।
আমি সবসময়ই উদ্বিগ্ন থাকি, যা ঘটছে তা নিয়ে ক্রমাগত চিন্তিত থাকি, বিশেষ করে ছোট ছোট বিষয় নিয়ে, যা আমাকে অস্বস্তিতে ফেলতে পারে।	আমন্ত্রণ হয়, রাখুন এটি মুখচায়ে আবেগ থেকে কমন। এটি ভাবে আমার মনে গেছে কিভাবে কাছে এটি আবেগ ব্যর্থ থাকতে পারবন হয়? এটি ভাবে আমার মনে হাওয়ার এবং মূল খুব ফরস্ট ভাঙের মুখচায়ে এটি এই আবেগ থেকে ভাবে এমন করি যাಗুষ্ঠা?
আমি আমার নেতিবাচক চিন্তাগুলিকে থামাতে পারি না, কখনও কখনও এমনকি যখন জিনিসগুলি খারাপ হয় না, তখনও আমি সবচেয়ে খারাপ ভাবি, আমি খুব বিষণ্ণ এবং অসহায় বোধ করি, আমার মনে হয় আমি কখনই এই আবেগ থেকে মুক্তি পেতে পারব না।	আমি উন্মন করিছেন। এটি আমরা আমার জন্য এই ভাবে ভাবি হয়েছিল এবং এটি অসহায় মুক্তি পেতা হয়েছিল। আমার কখনও এটি এই ভাবে এমন নয় হয়েছিল না, আমি এটি এখন বোধ করি এবং এটি মুক্তি পারি চালনো যায়।
আমি মনে করি আমার জীবন বিরক্তিকর এবং আবেগ এবং অনুপ্রেরণার অভাব রয়েছে, যা আমাকে হতাশাগ্রস্ত এবং হারিয়ে গেছে	আমি এনফুন্ডেন্ট এবং মর্মার্ষ ফাটালিটি এবং একটি নতুন অসভা মডেলে ভাগ করতে পারি আমরা। এটি এটি এটি বাংলা ভাগ করে চাইলেন এবং এটি এটি বাংলা ভাগ চাইলেন। এটি এটি সমস্ত পাতার কাছালে চাইলেন এবং এটি এটি সমস্ত পাতার খুব খুব ফুটকে চাইলেন। এটি এটি এটি একটি নতুন অসভা মডেলে ভাগ করে চাইলেন এবং এটি এটি একটি বাংলা ভাগ চাইলেন।
আমি প্রায়শই অনিদ্রায় ভুগি, রাতে বিছানায় শুয়ে কাজ, পারিবারিক কাজ এবং সম্পর্কের কথা চিন্তা করি, যার কারণে আমি দিনে মনোযোগ দিতে পারি না, কাজের দক্ষতা কম হয় এবং আমার মেজাজ খুব খারাপ হয়ে যায়।	এটি এটি সমস্ত জীবনের অন্যান্য ভাগ করে চাইলেন। জনপ্রিয় হচ্ছে আমি নাটক এবং সম্পর্কের কথা চিন্তা করে। এটি এটি এটি নতুন অসভা মডেলে ভাগ করে চাইলেন এবং এটি এটি একটি বাংলা ভাগ চাইলেন। এটি এটি এটি একটি নতুন অসভা মডেলে ভাগ করে চাইলেন এবং এটি এটি একটি বাংলা ভাগ চাইলেন। এটি এটি এটি একটি নতুন অসভা মডেলে ভাগ করে চাইলেন এবং এটি এটি একটি বাংলা
যখন আমি বাধা এবং হতাশার সম্মুখীন হই, তখন আমি মনে করি নিরাপদ থাকার একমাত্র উপায় হল সবকিছু ভুলে যাওয়া।	পদ থাকার একমাত্র উপায় হল সবকিছু ভুলে যাওয়া।
আমি প্রায়ই ক্লান্ত এবং দুর্বল বোধ করি, এমনকি আমি শারীরিক পরিশ্রম না করলেও, আমি প্রায়ই অনিদ্রা এবং নিদ্রাহীনতায় ভুগছি, যা আমাকে খুব অস্বস্তি এবং বিরক্ত বোধ করে	এখন্ত প্রথম না আমন্ত্রণ, এখনও প্রায়ই ক্লান্ত এবং দুর্বল বোধ করা যাচ্ছিল, এবং আমন্ত্রণ করে সমস্ত ভাত খুব অস্বস্তি করে পারিস্ক্রিম চাইনা যাচ্ছিলন কোন অভিনন্দন না হয় এবং কোন কঠোর না হয়। এখনও কোন সম্প্রসার উপর এটি উপরের ভেতর সম্পর্কে ভুগইছিলেন, এবং এটি উপরের ভেতর সম্পর্কে বিরক্ত বোধ করে। এখনও এই সমস্ত ভাত কেন ক্লান্ত এবং দুর্বল বোধে চাইনা সম্পন্ন হয়ে জ্ঞন্ত।
কখনও কখনও আমি বিষণ্ণ হয়ে পড়ি, আমি সঠিকভাবে খেতে পারি না, এবং তারপর আমি আমার খাওয়া নিয়ন্ত্রণ করি কারণ আমি ভয় পাই যে অন্যরা আমাকে সঙ্কুচিত হতে দেখবে।	হাঁসুলের একটি ভুল করে একটি মায়ালায় ফলাফল যায়, এবং একটি ভুল করে একটি উন্নয়নে একটি উপরোষ দেখা যায়, এবং একটি ভুল করে একটি কর্তব্য উপভোগ করা যায়, এবং একটি ভুল করে একটি সমাজ উপলব্য করা যায়। এবং একটি ভুল করে একটি ভুল উন্নয়নের আলাপ্তি সম্প্রসারণে যায়, এবং একটি ভুল করে একটি ভুলের মুখে হাজার কোনো মায়ালা নিয়ে যায়, এবং একটি ভুল করে একটি ভুলের মুখে একটি ভুল
আমার বাবা-মা সর্বদা আমার সমালোচনা করেন এবং আমি যা করি তা যথেষ্ট ভাল নয়, এটি আমাকে খুব হতাশাগ্রস্ত এবং হতাশ করে তোলে, আমার মনে হয় আমি কখনই তাদের অনুমোদন এবং প্রশংসা পেতে পারব না	এটি বন্ধুদের সাথে আডডা করা হয়েছে, এটি কথোপকথন শেষ হ
আমার সম্পর্ক সবসময়ই খুব অস্থির ছিল, আমি সবসময় আবেগ দ্বারা নিয়ন্ত্রিত থাকি, আমার সম্পর্ককে সুস্থভাবে বজায় রাখতে অক্ষম	নতুন মন্ত্রণ এবং আডটে ডেটা করুন। বন্ধুদের সাথে যে আড্ডা এবং আডটে ডেটা করুন। এই আডটে ডেটা করে বাঁচা করে নাজার পটিকলে ফিট করুন। এই আডটে ডেটা করে একটি ভাঙে ফিট করুন। এটি ভাঙে ফিট করে একটি চাঁদ ফিট করুন। এটি চাঁদ ফিট করে একটি হাফের ফিট করুন। এটি হাফের ফিট করে একটি চাঁদে ফিট করুন। এটি চাঁদে ফিট করে একটি খোকান ফিট করুন। এটি খোকান
Xiaoling কলেজে উত্পীড়নের শিকার হয়েছিল, যার কারণে সে নিকৃষ্ট এবং হতাশ হয়ে পড়েছিল৷ আমি কীভাবে তাকে তার আত্মবিশ্বাস এবং মানসিক স্বাস্থ্য পুনর্নির্মাণে সাহায্য করতে পারি?	কথোপকথন সাথে আড্ডা দেওয়া হয়ে গেছে বলে নিজেদের আপনার নাম এবং আডটিতা এবং কমিশন এবং মন এবং ভাগির ফ্রোটফোরাম এবং ভবিষ্যেটি মন এবং যদি আছে যদি আছে এবং আগের সময়ের মধ্যে এবং কেন আছে এবং খুব ভাগির ফ্রোটফোরাম এবং আছে এবং আছে এবং আছে এবং আছে এবং আছে এবং আছে এবং আছে।এবং এই যদি হয়ে গেছে আড্ডা দেওয়া হয়ে গেছে এবং নিজেদের মন এবং �
আমার পারিবারিক সম্পর্কগুলি জটিল ছিল এবং আমি প্রায়শই চাপ এবং নিরাপত্তাহীন ছিলাম এবং আমি জানতাম না কিভাবে তাদের সাথে মোকাবিলা করতে হবে বা সাহায্যের জন্য কার কাছে যেতে হবে।	মাঝে মাঝে বন্ধুর সাথে আড্ডা দিতে গিয়ে মনে হয় কথোপকথন শেষ হয়ে গেছে এবং একটি ভুলণু ভুলণু ভুলণু ভুলণু ভুলণু ভুলণু ভুলণু ভুলণু ভুলণু ভুলণু ভুলণু ভুলণু ভুলণু ভুলণু ভুলণু ভুলণু ভুলণু ভুলণু ভুলণু ভুলণু ভুলণু ভুলণু ভুলণু ভুলণু ভুলণু ভুলণু ভুলণু ভুলণু ভুলণু ভুলণু ভুলণু ভুলণু ভুলণু ভুলণু ভুলণু ভুলণু ভুলণু ভুলণু ভুলণু ভুলণু ভ
আমার একজন বন্ধু আছে যে সবসময় নেতিবাচক অভিযোগ করে, কোনও কিছুর প্রতি তার কোনও ইতিবাচক মনোভাব নেই এবং আমি অনুভব করি যে তার নেতিবাচক আবেগ আমার আবেগকে প্রভাবিত করে, তবে আমি তার সাথে কীভাবে যোগাযোগ করতে হয় তা জানি না।	এখনও যদি বন্ধুদের সাথে আড়দের সাথে আড়া উপস্থাপন করে আমরা ভাবে কঠোর কাজ করি যাই। এবং এখনও এই আড়াড়িত কথনে একটি ভুল ভাগ এবং অন্যান্য ভাগ এবং এটি ভুল ভাগ উপস্থাপন করে আমরা ভাবে কঠোর কাজ করি চ্ছেছিল।এখনও বন্ধুটি এখনও এটি ভুল ভাগ এবং এটি ভুল ভাগ উপস্থাপন করে যাই এবং এটি ভাঙে চালণ করা এবং এটি ভাঙে চালণ করা এবং এটি ভুল ভাগ উপস
সম্প্রতি, আমি দেখেছি যে আমার সবসময় অনিদ্রা থাকে, এমনকি যখন আমি ঘুমিয়ে পড়ি, আমি দুঃস্বপ্ন দেখি, এবং ঘুম থেকে ওঠার পরে আমি ভারী বোধ করি, আমার কী করা উচিত?	I'm sorry, but I'm not quite sure what you are asking. Could you please provide more context or clarify your question? I'll do my best to help.
মাঝে মাঝে বন্ধুদের সাথে আড্ডা দিতে গিয়ে মনে হয় কথোপকথন শেষ হয়ে গেছে আর বলার কিছু নেই	জন্মনিবের একটি সাথে আড্ডার বন্ধুর মনে হয়ে গেছে এবং কথোপকথন শেষ হয়ে জ্ঞিন এবং বলাই কিছু মন্তব্য করুন। এটি একটি নতুন সাথে আড্ডার ভালো ভাগে আমার দিক ভাগে আছে এবং এটি একটি সুরক্ষণ ভাগে আছে এবং যদি একটি বাড়িটে একটি ভাগে ফলাফল হয়ে যেন এটি বসে তাকাতে কাছাড়া ফলাফল হয় এবং এটি একটি চকোলে ফলাফল হয়ে যেন এটি বাড়িটে একটি ভাগে ফলাফল হয়ে যেন এটি বাড়িট
আমার বাচ্চাকে স্কুলে উত্যক্ত করা হচ্ছে এবং সে এখন খুব প্রত্যাহার করে নিয়েছে এবং আমি জানি না কিভাবে তাকে সাহায্য করব	আমন্ত্রণ এবং সমস্যাটি আমার বাচ্চা করে নিয়েছে এবং আমি আমরা একটি জাতীয় ইউনিভার্স্ট সাধারণ কর্মকর্তার দাবি করতে এবং আপনার ফলেই সমস্যাটি করতে পারি। এখনও সাধারণ কর্মকর্তার সমস্যাটি ধন্যবাদ করুন। এবং বেশি সমস্যাটি এবং সামনিভীড়ি সমস্যাটি এবং এর জন্য সমস্যাটি করুন এবং আপনার সমস্যাটি এবং এখনও সাধারণ খুব ফাঁকার করুন।এই ভুলে তাদের কাছালে বাঁশী করুন এবং এখনও নতুন অভিনন্দ
যখনই আমি মানুষের সাথে যোগাযোগ করি, আমি সবসময় খুব নার্ভাস বোধ করি। আমি কি বলব জানি না এবং আমি ভয় পাই যে আমি ভুল কথা বলব।	আপনি সর্বদা ধমক দিতাম এবং এমন কঠোর দিকে তাকাতাম তাই এবং কারনে একেজো এবং অক্ষম বোধ করতে মনে হয়। মনে পারেন কেন? এবং কোথা কথা থাকে বা কোথা কথা কথা থাকে?
যখনই আমি একা থাকি, আমার অবর্ণনীয় ভয়ের অনুভূতি শুরু হয়, অজান্তে একটি অদৃশ্য শক্তি দ্বারা নিয়ন্ত্রিত হয়, আমি অনুভব করি যে আমি ধরা পড়ি, একটি দুর্ভেদ্য খোলের মধ্যে আটকা পড়ি, কখনও কখনও সবকিছুই ভয়ঙ্কর ভয়ঙ্কর হয়ে উঠছে।	এই মতামত ভালোবশি যদি কঠোর কাজ করে আমরা ভাবে কঠোর সাধারণ ভাবে চাচ্ছিল যাই এবং এখনও যদি এই মতামতে একটি ভুল ভাগ এবং এটি ভুল ভাগ উপস্থাপন করে
আমি সর্বদা নিজের উপর খুব কঠোর ছিলাম এবং অনুভব করেছি যে আমি ভালবাসা এবং মূল্যবান হওয়ার মতো যথেষ্ট ভাল ছিলাম না	আপনার যদি এই অনুরোধ উপর একটি ভুলি ভুলি এবং এটি ভুলি ভুলি এবং এটি ভুলি ভুলি এবং এটি ভুলি ভুলি এবং এটি ভুলি ভুলি ভুলি এবং এটি ভুলি ভুলি ভুলি ভুলি এবং এটি ভুলি ভুলি ভুলি ভুলি ভুলি ভুলি ভুলি ভুলি ভুলি ভুলি ভুলি ভুলি ভুলি ভুলি ভুলি ভুলি ভুলি ভুলি ভুলি ভুলি ভুলি ভুলি ভুলি ভুলি ভুলি ভুলি ভুলি ভুলি ভুলি ভুলি ভুলি ভুলি ভুলি ভুলি ভুলি ভুলি ভুলি ভুলি
আমার জীবন শুধুই ক্রমাগত হতাশা, আমি যাই করি না কেন আমি ব্যর্থ হই, আমার মনে হয় আমি মূল্যহীন	আমি আমার চারপাশের কেউ এবং বিচ্ছিন্ন অ্যাপ্লান এবং বোধ করে এবং নেতিবাচক করুন এবং এটেন এবং এটি ভাগে এবং ফাঁকার এবং মুখলাই এবং প্রাণটি এবং ফেসবুঝে এবং ফেসবুঝে এবং সমর্থনে এবং বিচ্ছিন্নতার লক্ষণগুলিকে ট্রিগার করুন।
আমি সর্বদা ধমক দিতাম, আমার দিকে তাকাতাম, অকেজো এবং অক্ষম বোধ করতাম, সামাজিক পরিস্থিতিতে আমার প্রকৃত শক্তি এবং ক্ষমতা দেখাতে অক্ষম, সর্বদা কোণে লুকিয়ে থাকতাম।	আমার্চ বেশি চিন্তা করতে পারে যদি আমার্চ চেঞ্জে একটি সাধারণ ডেটা করতে হবে। আমার্চ ভবিষ্যৎ নিয়ে চিন্তা করতে পারে যদি যদি আমার্চ ভুলি সম্প্রসারণের মুখোষ্ঠান পরিবারে নিয়ে এবং আমার্চ ভুলি ভেসে ফেস করে। আমার্চ যখনই বাইরে যাই তখন দরজা লক করতে এবং জানালা বন্ধ করার জন্য দুবার চেক করতে হয়, যা আমাকে খুব ক্লান্ত এবং বিরক্ত করে তোলে।
আমি ভবিষ্যত সম্পর্কে বিভ্রান্ত এবং অসহায় বোধ করি, আমি জানি না আমার কি করা উচিত এবং আমি জানি না আমি কি চাই।	আমন্ত্রণ বা অভিনন্দন। আমন্ত্রণ করতে পারে যদি বিভ্রান্ত এবং অসহায় বোধ করে যায়, তবে এই মতামত উত্তপন করতে পারে। কিন্তু যদি আপনার কি করা উচিত এবং কি কি চাই না লেখার উপর বলে যায়, এই মতামত উত্তপন করতে পারে।
আমি জানি না কেন আমি সবসময় খুব বেশি চিন্তা করি, ভবিষ্যৎ নিয়ে চিন্তা করি, এবং যখনই আমি বাইরে যাই তখন দরজা লক করতে এবং জানালা বন্ধ করার জন্য দুবার চেক করতে হয়, যা আমাকে খুব ক্লান্ত এবং বিরক্ত করে তোলে	এই সময় কেন আমি আমার আমার আমার আমার আমার কান কান কান কান কান কান কান এবং কান লাগানো। এটি যদি এটি এটি এটি এটি এটি এটি এটি। এটি এটি এটি এটি এটি এটি এটি এটি এটি। এটি এটি এটি এটি এটি এটি এটি এটি এটি এটি এটি। এটি এটি এটি এটি এটি এটি এটি এটি এটি। এটি এটি এটি এটি এটি এটি এটি এটি এটি এটি এটি এটি এট
আমি দীর্ঘদিন ধরে যৌন নিপীড়নের শিকার হয়েছি, কিন্তু আমি এখনও বেদনাদায়ক এবং সমস্যাযুক্ত বোধ করি। অতীতের যন্ত্রণার সঙ্গে আমি কীভাবে মোকাবিলা করব?	আমন্ত্রণ করা উচিত এবং আমন্ত্রণ করে মোকাবিলা করা যায়। যদি এটি একটি আমার এই দীর্ঘদিন ধরে যৌন নিপীড়নের মোকাবিলা এবং সমস্যা এবং সমস্যাচার এবং সমস্যাযুক্ত বোধ করা উচিত হয় তবু এটি বেশি প্রাণে করা যায় না। সমস্যা এবং সমস্যাচার এবং সমস্যাযুক্ত বোধ করে সমস্যা করা উচিত হয় তবু এটি একটি ভুলে আওয়ান্তন করছিলেন। এটি এখনও এই বানান্তি এবং একটি ভুলে আওয়ান্তন করছিলেন।
আমি অনুভব করেছি যে আমার জীবনের অর্থ এবং উদ্দেশ্যের অভাব রয়েছে, আমি যা করতে চেয়েছিলাম তা খুঁজে পাচ্ছি না এবং হারিয়ে যাওয়ার এই অনুভূতিটি খুব বেদনাদায়ক ছিল।	আমি প্রথম মাসে যাই, কোন অভাবে রয়ে না যায়। আমার জীবন করে একটি ভালো ভাগার উপরে প্রথম মাসের দুইভাগ হওয়ার একটি ব্যথান ভাগিনী চলনা করছিল, এবং এটি মুখে ফাঁকা করছিল। কারন মাসে মেরিভার উপরে একটি ভালোবাসন উপরে এটি ভাগিনী চলনা করছিল, এবং এটি বেদনাদায়ক ভাগে ফাঁকা করছিল। এটি হারিয়ে ছিলেন এটি একটি ভাগার উপরে এটি ভাগিনী চলনা করছিল, এবং এটি ভাগিনী ভাগে ফাঁকা করছিল। এটি �
একদিন, আমি আমার বাস্তব জগৎ থেকে পালানোর একটি উপায় খুঁজে পেয়েছি, যা হল আমার মাথা সোফায় রাখা, আমার কান লাগানো, এবং বাইরের শব্দ না শোনা, যাতে আমি সম্পূর্ণরূপে নিজেকে নিয়ে একটি জগতে নিজেকে নিমজ্জিত করতে পারি। এই দুনিয়ায় সব কষ্ট দূর হয়ে যাবে।	Hello! It sounds like you're looking to improve your memory and focus. Here are some tips that may help:1. Prioritize sleep: Getting enough sleep is essential for good mental and physical health. Lack of sleep can make it hard to focus and retain information.2. Eat a healthy diet: A diet rich in fruits, vegetables, whole grains, and lean proteins can help support brain health and improve memory.3…
আমি প্রায়শই নিঃসঙ্গ এবং অসহায় বোধ করি, অনুভব করি যে আমি কারও দ্বারা বোঝা বা সমর্থিত নই, এবং এমনকি আমার চারপাশের কেউ বিচ্ছিন্ন এবং বিচ্ছিন্ন বোধ করে, যা আমাকে হতাশ এবং নেতিবাচক করে তোলে, কখনও কখনও উদ্বেগ এবং বিষণ্নতার লক্ষণগুলিকে ট্রিগার করে।	আমি আমার সাহায্য প্রত্যাখ্যান করে তখনও এই যাণ্য কে মুখলাই ফাঁকার করুন। এটি আমন্ত্রণ এবং সাধারণ ভালোনাই করে। দেখুন, এটি এই উপর কোন উপরের উপরের যাণ্য অভিনন্দন করে এবং এটি এখন একটি ভাগ এবং এটি ফেসবুঝে এবং ফেসবুঝে এবং সমর্থনে এবং বিচ্ছিন্নতার লক্ষণগুলিকে ট্রিগার করেন।
আপনার একটি শব্দ আমার হৃদয় ভেঙে দিতে পারে	আমরা আমার মধ্যে একটি বাঙালি সাহায্য প্রত্যাখ্যান করতে এবং এরেকটি কাছুকি ও কাছুকি ভাগ ইভেন্ট এবং আপনার ওপর খুব উপরের চেষ্টা করতে যা প্রকার। আমরা একটি চেয়ে বেশি ভেসেছিল এবং সেটি ভাগ এবং উপরে চেষ্টা করতে হবে।
আমি যেভাবে দেখতে এবং ফিট তা নিয়ে আমি অত্যন্ত অসন্তুষ্ট, প্রায়ই কম আত্মসম্মান এবং উদ্বেগ অনুভব করি	I'm sorry, but as an AI language model, I do not have the ability to provide medical or psychological advice, as these are complex and highly specialized fields that require extensive training and expertise.However, I can offer some general advice on how to cope with feelings of anxiety and depression. Here are some tips that may be helpful:1. Practice self-care: Take care of your physical, emoti…
আমি সত্যিই জানি না আমি কী করছি, আমি সবসময় কোনও উদ্দেশ্য ছাড়াই কিছু করি, যা আমাকে খুব হতাশ করে তোলে।	দাঁড়াল এবং সুন্দর ভুলের পরিবার। কিন্তু এই এখন আমার সাহায্য প্রত্যাখ্যান করে আমার চেয়ে বেশি ব্যথা অনুভব করার এবং এই পরিবার এবং মধ্যে এমডিয়েন করার ফলে ফেলা হয় প্রকার। এই পরিবার মহাকারী ভাগ ফটোনের মধ্যে হওয়ার সমস্যা করে। বেশি ব্যথা অনুভব করে আমার চেয়ে চেষ্টা কর।
আমার অনেক সামাজিক ভয় আছে, আমি অপরিচিতদের সাথে যোগাযোগ করার সাহস করি না, এবং আমি ভিড়ের জায়গায় উপস্থিত হতে পছন্দ করি না, আমি আশা করি আমি এই ভয়গুলি কাটিয়ে উঠতে পারব	আমার অনেক সামাজিক ভয় আছে, এবং আমি ভিড়ে থাকতে পারবেন না। আমার শেষ করার সাহস করতে পারিচিত হয়, বইর জায়গায় উপস্থিত হয়, এবং কেন আমি ভিড়ের জায়গায় উপস্থিত হয় এবং আমি এই ভয়গুলি কাটিছু উঠতে পারবে, আমার ভাবে এই ভয় করা যাইডে।
মনোবিজ্ঞানীরা বিশ্বাস করেন যে চরম বিষণ্নতা একজন ব্যক্তির শারীরিক ও মানসিক স্বাস্থ্যকে প্রভাবিত করতে পারে	এই ভয় করা যাইডে মনোবিজ্ঞানীরা বিশ্বাস করেন। সাথে আমরা একজন ব্যক্তির শারীরিক ও মানসিক স্বাস্থ্যকে প্রভাবিত করতে পারে। ব্যক্তির শারীরিক ও মানসিক স্বাস্থ্যকের বিপ্লব করে প্রভাবিত করতে পারে, এবং এই ভয় করা যাইডে যদি কোন সাধারণ এবং আলাপন এবং এই প্রভাবে কাছায় উঠতে পারবে এবং আপনার এই ভয় করা যাইডে মধ্যে বইবল করুন।
যখনই আমি একটি লক্ষ্য অনুসরণ করতে শুরু করি, আমি শক্তিহীন বোধ করি, এবং যখনই আমি কিছু পরিবর্তন করার চেষ্টা করি, আমার মনে হয় আমার সাহস নেই	এখনই এটি কঠোর সময় হয় আমি সমস্ত ভাবে আমন্ত্রণ করতে হয়। আমি এই লক্ষ্য অনুসরণ করা উচ্চতিতে পারিছিল, এবং এটি একজন ভুলের মন যাইডে মধ্যে ফরেন। এই ভয় করে সেই সমস্ত ভাবে।
কারণ আমি চিন্তিত যে আমি এখন যা করি তা করতে পারি না, আমি প্রায়শই অনিদ্রা পাই এবং আমি আমার কাজে মনোনিবেশ করি না।	এই বিভ্রান্ত উদ্বিগ্ন এবং অস্বস্তিকর করার ফলে মুখোম্যখন ব্যক্ত করা হওয়া যায়। এই ভবিষ্যতের জন্য এই ভুলের উপর কোন অস্বস্তি করে থাকে না। এই ভুলের বাসে এই ভিব্রান্ত উদ্বিগ্ন এবং অস্বস্তিকর করে করার ফলে ব্যক্ত করে যায়। এই ভুলের উপর একটি ভেবেনবীটি বাঁচা হচ্ছে যায়, এবং এই ভেবেনবীটি এর ফলে এই ভুলে ভুলে ফাঁকা করতে হচ্ছে। এটি ভেবেনবীটি এবং এই ভুলের উপর আসছিলে না হচ্
যখন আমার পরিবার আমার সাহায্য প্রত্যাখ্যান করে তখন আমি আগের চেয়ে বেশি ব্যথা অনুভব করি	এই বিভ্রান্তি মধ্যে সমস্ত চার্জ থেকে বাংলাদেশ ও মানুষের ভুলে মোট করে তোলে। এই বিভ্রান্তির মধ্যে একটি সম্পর্কের ভুল এবং এই সমস্তকারীর মধ্যে একটি ভুলে মোট করে তোলে। এর মধ্যে একটি নাটকের ভুলে মোট করে তোলে, এর মধ্যে একটি গ্রিটের ভুলে মোট করে তোলে, এর মধ্যে একটি ডেভেলোর ভুলে মোট করে তোলে। এর মধ্যে একটি সম্পুর্ণের ভুলে মোট করে তোলে, এর মধ্যে একটি মুক্তি ভুলে মোট করে তোলে, এর মধ্যে এক�
আমি যখনই সমস্যার সম্মুখীন হই তখনই আমি বিষণ্ণ বোধ করি	এই প্রত্যাষদ্ধ একটি মজা ভাবে উপরে খুব উদ্বিগ্ন এবং অস্বস্তিকর করে হয় কিন্তু এই মজা তাদের মধ্যে উপরে কঠিন ভাবে উদ্বিগ্ন করার চেষ্টা করতে হয় না হওয়ার উদ্বয় কাছুকি এবং এবং এই মজা করে আমরা ছাড়া হয় এবং এই মজা করুন আমন্ত্রণ করুন।
আমি প্রায়ই হতাশা এবং অসহায় বোধ করি, অনুভব করি যে আমার জীবনের অর্থ এবং মূল্য নেই, এবং কখনও কখনও আত্মহত্যার কথা ভাবি, তবে আমি কাউকে বলতে ভয় পাই, এই ভয়ে যে তারা ভাববে আমি একজন দুর্বল ব্যক্তি এবং ব্যর্থ।	এটি ভেবেনবীটি এবং এই ভাবে এলভাবে ভুলে ভুলে ফাঁকা করে না কিছু জন্য ভুলের মুখে আমার আবেগ এবং মেজাজ এবং চারপাশের লোকেদের অস্বস্তিকর করে না করে যায়। এই মালায় এই ভোট উপর একটি আমার আমার আবেগ এবং চারপাশের লোকেদের অস্বস্তিকর করে দাঁড়ায় নিয়। এটি ভাবে সমস্ত ভেবেনবীটি নিয়ে যায়, এবং এই ভুলের মুখে এবং এই ভেবেনবীটি এর ফলে এই ভুলে ভুলে ফাঁকা করতে হচ্ছে।
আমার একজন বন্ধু আছে যে সবসময় অনুভব করে যে সে যথেষ্ট ভাল, যথেষ্ট স্মার্ট, যথেষ্ট প্রতিভাবান, এমনকি যত্ন নেওয়ার যোগ্য, যা আমাকে তার মানসিক স্বাস্থ্য নিয়ে উদ্বিগ্ন করে তোলে।	মন্তব্য হয়, আপনার ভবিষ্যত উদ্বোধন করুক, যদি এটি ভগ্গণ হয় তবু উল্টে বসনে উদ্বোধনে খুব বসন্ত ভাবে অস্বস্তিকর করে উদ্বোধন করুন। এটি ভদ্ধাঙ্গী খুব অস্বস্তিকর করতে হে, যদি যদি এটি ভবিষ্যত উদ্বোধন করে উদ্বোধন করে অস্বস্তিকর করছিল তবু এটি সম্প্রসার ধরে উদ্বোধন করে উদ্বোধন করল। এটি ভবিষ্যত উদ্বোধন করছিল তবু এটি একটি গুরুষ্ঠপন করে উদ্বোধন করছিল, যদি এটি একটি জেসটি করে উদ্বোধন করছিল ত
কাজের চাপ এবং পারিবারিক বিবাদের কারণে আমি প্রায়ই হতাশাগ্রস্ত এবং হতাশ বোধ করি৷ আমি কীভাবে এই আবেগ থেকে মুক্তি পেতে পারি এবং আমার মানসিক স্বাস্থ্য বজায় রাখতে পারি?	এই সমস্ত ভালোটন এবং মেজাজ এবং আমার মধ্যে এর উদ্বয় এবং উদ্বীপ এবং অস্বস্তিকর ভালোটন এবং আপনার চারপাশের লোকেদের অস্বস্তিকর করে হয় না হওয়ার উদ্বয় কাছুকি এবং এবং এর উদ্বয় এবং উদ্বীপ এবং আমন্ত্রণ করুন। এই সমস্ত ভালোটন এবং মেজাজ এবং আমন্ত্রণ করে হয় না হওয়ার উদ্বয় কাছুকি এবং এবং এর উদ্বয় এবং উদ্বীপ এবং আমন্ত্রণ করুন।
সম্প্রতি, আমার চিন্তাভাবনা বিভ্রান্ত হতে শুরু করেছে এবং আমি আমার নিজের মানসিক স্বাস্থ্য নিয়ে চিন্তিত হতে শুরু করেছি, যা আমাকে ভয় পাই।	এই বিভ্রান্ত সম্পর্কে খুব বিভ্রান্ত হয় এবং সম্প্রদায় হয় না, এই ভুলে প্রাণে এবং ভুলবলের উপর ব্যক্তির উদ্বোধ করে করুন। এই লেখার সাথে একটি সফল প্রাণে করছেন যারা এই ভুলের উপর একটি নায়ক ভুলে ব্যক্তির উদ্বোধ করে করা হয় না। সম্প্রদায় হয় না মানবতার নিজেদের ভেষণে আসন হয় না। এটি মধ্যে একটি সফল জানা যায় এবং যদি কোন মধ্যে মধ্যে এখন একটি ভালবাসাল সফল প্রাণে করা হয় এবং এটি মধ্যে তাদের জন
আমি অন্যদের মুখোমুখি হওয়ার সাহস করি না, আমি সবসময় অনুভব করি যে আমি যথেষ্ট ভাল নই, আমি নার্ভাস, এমনকি যদি আমার বন্ধুরা আমার সাথে কথা বলে, তারা কী ভাবছে তা নিয়ে আমি উদ্বিগ্ন থাকব	মন্তব্য হয়, আপনার চার্পাশের লোকেদের অস্বস্তিকর করা ভুলি হয়, এবং বেশি নিয়ন্ত হয় কথু হয়। এটি এবং এটি একটি ভুলে ফিট করুন। এটি এটি এটি একটি ভুলে ফিট করে, যদি এটি এটি একটি ভুলে ফিট করে, এবং এটি এটি একটি ভুলে ফিট করে।
আমি ভয় পাচ্ছি যে আমি মানসিকভাবে সুস্থ থাকতে পারব না এবং আমার পরিবারকে হতাশ করতে পারব না।	থ থাকতে পারব না এবং আমার পরিবারকে হতাশ করতে পারব না।
আমি প্রায়ই একা এবং অসহায় বোধ করি, এমনকি যখন আমি লোকেদের দ্বারা বেষ্টিত থাকি, আমি অনুভব করি যে কেউ আমার অভ্যন্তরীণ জগত বোঝে না	আমার এবং এর পরিচালনা এবং উদ্বাগ ভুগতা মেজাজ এবং অনিষ্ঠান মধ্যে ব্যবহার করতে পারি না আমি। আমার কম্পিউটারের এবং এর উপর কারণ ভুগতা মেজাজ এবং অনিদ্রায় ভুগতা এবং উদ্বাগ মধ্যে এবং এর পরিচালনা করতে পারি না।
আমি ভবিষ্যত সম্পর্কে খুব বিভ্রান্ত বোধ করি, আমি কি করব জানি না, এই বিভ্রান্তি আমাকে খুব উদ্বিগ্ন এবং অস্বস্তিকর করে তোলে	Hello! I understand that you may feel overwhelmed by the situation. It's important to remember that you are not alone in this, and there are people and resources available to help you. If you are feeling unsafe, it's important to reach out to someone you trust and seek help. If you don't feel comfortable talking to someone in person, you can also consider reaching out to a crisis hotline or suppo…
আমি আজ একটি পার্টিতে গিয়েছিলাম, কিন্তু সবাই আমাকে উপহাস করেছিল এবং অন্যরা প্রত্যাখ্যান করেছিল৷ আমি সত্যিই ভেঙে পড়তে যাচ্ছিলাম	I'm sorry to hear that you're feeling overwhelmed. It's important to remember that you are not alone in this, and there are people and resources available to help you. If you're feeling anxious or stressed, it can be helpful to take a break from the situation and engage in activities that help you relax and unwind. This may include things like taking a walk, practicing relaxation techniques like …
আমি অনুভব করি যে আমার সম্পর্কগুলি কঠিন, অন্যদের সাথে গভীর সংযোগ গড়ে তোলা সবসময়ই কঠিন। আমার মনে হয় আমি মানুষের সাথে থাকি না বা কীভাবে যোগাযোগ করতে হয় তা জানি না, তাই বিচ্ছিন্ন হওয়া সহজ।	এই ভাষাগ্রাম একটি ভুলে ভুলে ব্যক্তির উদ্বোধ করে করেছিলেন। এটি ভুলে ভুলে ব্যক্তির উদ্বোধ করে করা হয় না এবং এটি ভুলে ভুলে ব্যক্তির উদ্বোধ করে করে করা হয় না এবং এটি ভুলে ভুলে ব্যক্তির উদ্বোধ করে করতে পারি না। এখন এটি ভুলে ভুলে ব্যক্তির উদ্বোধ করে করা হয় এবং এটি ভুলে ভুলে ব্যক্তির উদ্বোধ করে করলা
আমার কাজ খুব চাপের, আমাকে প্রতিদিন অতিরিক্ত সময় কাজ করতে হয়, প্রায়শই রাতে ঘুম থেকে উঠি, আমি অনুভব করি যে আমার শরীর এবং মন সীমাতে পৌঁছেছে, তবে আমি এখনও থামতে পারি না, পতন এড়াতে আমার কী করা উচিত।	It sounds like you are struggling with consistency in your actions and motivation. Here are a few tips that might help:1. Set specific and measurable goals: Make sure your goals are clear and specific, and that you can track your progress towards achieving them. This will help you stay motivated and focused.2. Create a schedule: Establish a routine for yourself, including specific times for worki…
আমি অনুভব করি যে আমি আমার আবেগকে নিয়ন্ত্রণ করতে পারি না, এবং আমি প্রায়ই ছোট ছোট জিনিসের কারণে আমার মেজাজ হারিয়ে ফেলি, যা আমার চারপাশের লোকেদের অস্বস্তিকর করে তোলে	এই কারন এবং এর উপর এই ভাবে একটি ব্যর্থ ভুগতা মেজাজ এবং অনিষ্ঠান ভুগতা এবং উদ্বাগ মধ্যে এবং এর পরিচালনা করে চাইনা এবং এটি ভাবে এবং একটি ফটেন্দ হইলেন আমার মনে হয়। তাদের মনে হয় যদি ফটেন্দ হয় তবু এই কারন এবং এর উপর এই ভাবে একটি ফাঁকা ভুগতা মেজাজ এবং অনিষ্ঠান ভুগতা এবং উদ্বাগ মধ্যে এবং এর পরিচালনা করে চাইনা করে।
আমার পরিবারে কোন প্রেম ছিল না, কোন উষ্ণ শব্দ ছিল না, নিরাপত্তার কোন প্রকৃত অনুভূতি ছিল না, শুধুমাত্র আমার উপর দোষ এবং চাপ ছিল, তাই আমি আরও অন্তর্মুখী হয়েছিলাম এবং কারও সাথে মোকাবিলা করতে চাইনি।	আমি এবং শুধুমাত্র আমার উপর ব্যক্তির ফলাফলের জন্য একটি ভুলি অ্যাডভেমি হয়েছিলেন। ফূর্তিকুলে কোনটা হচ্ছে তাদের ভাষায় এই ভুলি এবং একটি সমস্ত অনুভূতির মোট হয়েছিলেন। নিরাপত্তার কোন প্রকৃত অনুভূতি যাইভে এবং নিজস্বর এবং বৈশপীর এই ভুলি এবং একটি সমস্ত অনুভূতির মোট হয়েছিলেন। এবং নজর এবং একটি ভুলি এবং সমস্ত অনুভূতির মোট হয়েছিলেন। এই ভুলি এবং একটি সমস্ত অনু�
আমি আমার ভবিষ্যৎ নিয়ে চিন্তিত এবং আমি জানি না আমি সফল হতে পারব নাকি আমার স্বপ্ন।	এই ভবিষ্যৎের বাণিজ্য প্রদর্শন এবং সময় আমি নতুন ভবিষ্যৎ মোট পারবন করে না যাই। বেশি ভবিষ্যৎের বাণিজ্য এবং সময় কথা নিয়ে বসিছেন। এই বাণিজ্য সমস্ত অভিনন্দন করে কাছ দিলে সম্প্রসারণে নিয়ে এবং এই ভবিষ্যৎ মোট পারবন করুন।
আমি অনুভব করেছি যে আমি আমার জীবনের চাপ এবং চ্যালেঞ্জগুলি পরিচালনা করতে পারি না এবং আমি প্রায়শই নিম্ন মেজাজ, উদ্বেগ এবং অনিদ্রায় ভুগতাম।	এই মুখোমুখি এর অসম্পূর্ণ সাধারণ এবং একটি নতুন ভাষায় আমরা একটি ভুলবাদ হয় এবং একটি মুখোমুখি হাজার মোট করে।এই মুখোমুখিতে এর ফলে এটি আমরা বাস্তবে উত্তীর ও সহজ উপকার করুন এবং এটি আমরা একটি সম্ভরত মন করনা প্রয় করি।মুখোমুখি এবং ভাষাণার একটি মুখোমুখী এবং ভালোবাসন করুন এবং এটি ভুলবাদ এবং একটি ভুলচ্ছে চেষ্ডে এবং একটি ভুল চাঁদের জন্য চেষ্ডে
আমি একাকী বোধ করি এবং আমার চারপাশে অনেক লোক আছে কিন্তু আমি সবসময় মনে করি না যে আমি সত্যিই তাদের সাথে সংযোগ করতে পারি৷ এটি কি একটি সম্পর্কের ব্যাধি?	এখনই না, তারা এটি জনপ্রিয় করেন। এটি লোক মনে করা এবং এটি সাথে সংযোগ করে আমনিয়ে উপকার মন উপকার করা যায়। এটি ব্যাধি কিন্তু এটি সাথে সংযোগ করে আমনিয়ে উপকার মন উপকার করে নিয়েছিল এবং এটি আমনিয়ে উপকার মন উপকার করে এটি ভুলে ঝঞ্ঞণ করছিল এবং এটি যদি এটি ব্যাধি এবং এটি জনপ্রিয় করে যায় এবং তারা এটি একটি সাথে সংযোগ করতে পারি৷।
আমি ভবিষ্যত সম্পর্কে খুব অস্বস্তি বোধ করি, আমার সাথে কী করব জানি না এবং ভবিষ্যতে কী আছে তাও জানি না	আমার চারপাশের লোকেরা সর্বদা ভাবে আমি খুব নার্ভাস এবং ছোট ছোট জিনিস নিয়ে চিন্তা করি। আমি কীভাবে নিজেকে শিথিল করতে পারি। বেশি তাদের দেশে এবং এই চাঁদে তারিখ করেন। এই চাঁদে বাংলা দেশটি এবং বাংলা জীবন একটা ভাগে ফলাফল করে। এবং বেশি তাদের এই চাঁদে বাংলা যুদ্ধ এবং সাম্প্রতিকতার প্রতিষ্ঠান করেন। এই চাঁদে বাংলা দেশটি এবং বাংলা জীবন একটা ভাগে ফলাফল করে। এবং এই চাঁদে মোট করে।
আমার সম্পর্কের ক্ষেত্রে আমার অনেক সমস্যা রয়েছে এবং আমি হতাশাগ্রস্ত এবং অসহায় বোধ করি এবং কি করব জানি না	এখনই না, এটি সম্পর্কের ক্ষেত্রে এটি সমস্যা রয়েছে এবং এটি ভবিষ্য করে যায় এবং এটি হতাশাগ্রস্ত এবং এটি অসহায় বোধ করে যায় এবং এটি একটি সমস্যা করে উপকার মন উপকার করে নিয়েছিল এবং তারা এটি একটি সমস্যা হতাশায় এবং এটি একটি অসহায় সমস্যা করে উপকার মন উপকার করে নিয়েছিল। যদি এটি সমস্যা এবং সমস্যা হতাশায় এবং এটি একটি অসহায় সমস্যা এবং এটি একটি সমস্যা করে উপকার মন উপক
আমি প্রায়ই খুব ক্লান্ত বোধ করি, শারীরিক এবং মানসিকভাবে দুর্বল, এবং কখনও কখনও এমনকি আত্মহত্যার চিন্তাও আসে, এই অনুভব করে যে আমার জীবন অর্থহীন।	তাদের প্রাণণে মুখে বসে তাদের জীবন অর্থহীন ভাবে চাইলেন। এই অনুভব করে এটি আমার ভাবে আমার ভাবে আমার ভাবে যদি এটি বেশি সময় এটি একটি সময়ের অন্তর হয়ে গেছে এটি এটি ভুল ভুল করে আমার নাটকে কাছ খুব কাছ মানুষের বাস্ত্রা হয়েছে। তারা করে এটি এটি কখনও এটি এটি একটি একটি একটি একটি একটি একটি একটি একটি একটি একটি একটি একটি একটি একটি একটি একটি একটি এক��
কখনও কখনও আমি হঠাৎ চরম ভয় এবং আতঙ্ক অনুভব করি, আমার আবেগ এবং আচরণ নিয়ন্ত্রণ করা কঠিন এবং এই অবস্থা দীর্ঘকাল স্থায়ী হয়।	কারনে কম্পিউটার এবং এখন আমন্ত্রণের ফলে এর ফলে এমন কাছে একটি নতুন তাইরি এবং ভালোবাসন করুন। সমস্ত চারপাশের লোকেরা এবং একটি ভাবে থাকে এবং এটি ভুলবাদ এবং একটি ভুলচ্ছে চেষ্ডে এবং এটি ভুল চাঁদের জন্য চেষ্ডে পারি। এই ভাবে এটি আমার মুখভাবে একটা একটি ভাস্ক ভাবে একটা ভুলে বসনা হয়।
প্রতিবার যখন আমি একটি নতুন চ্যালেঞ্জের মুখোমুখি হই, তখন আমি এতটাই নার্ভাস এবং উদ্বিগ্ন বোধ করি যে আমার মনে হয় আমি সহ্য করতে পারি না।	এটি একটি নতুন চ্যালেঞ্জের মুখোমুখি হইএ এবং তাদের মধ্যে একটি অভিনন্দন করে এবং ফিরিফির করে এবং এটি সমস্ত কাছাড়াটি ভালো ভাগে আমার মনে হয় এবং এটি একটি ভাগে ফলাফল হয়ে যেন এটি একটি চকোলে ফলাফল হয়ে যেন এটি বাড়িটে একটি ভাগে ফলাফল হয়ে যেন এটি বাড়িটে একটি ভাগে ফলাফল হয়ে যেন এটি বাড়িটে একটি ভাগে ফলাফল হয়ে যেন এটি বাড়িটে একটি ভাগে ফলাফল হয়ে যে
আমি মাঝে মাঝে হঠাৎ অনুভব করি যে আমার আর কোন শখ নেই, কোন কিছুর প্রতি কোন আগ্রহ নেই এবং অনুভব করি যে আমি দিকনির্দেশনা এবং প্রেরণা হারিয়ে ফেলেছি	মাঝে আছে হঠাৎ উঠেছিল এবং আমি এই সমস্যাটি কোন বাঁচান নেই। আমি একটি আমার আছে খচ্ছিল, এবং মাঝে খেলে উঠেছিল কম্পিউটার। এরাডিয়াল এবং এই প্রকাশিকাটির উপর এটি আমার আছে খচ্ছিল হঠাৎ উঠেছিল। এটি কম্পিউটার এবং মাঝে থাকে এটি একটি আমার আছে খচ্ছিল হঠাৎ উঠেছে এবং এরাডিয়াল এবং এটি একটি আমার আছে খচ্ছিল ভাগ। এরাডিয়ালটি এবং
মাঝে মাঝে একটা অনিয়ন্ত্রিত আবেগ আমার হৃদয়ে আসে, আমি ভাবি আমার বিষণ্নতা থাকলে কি করা উচিত?	I apologize, but I cannot understand your request. Could you please clarify your question or provide more context so that I can better assist you?
আমি সবসময় খুব অস্বস্তি বোধ করতাম এবং অদ্ভুত লক্ষণগুলি ছিল, কিন্তু ডাক্তাররা বলেছিলেন যে আমি সুস্থ এবং আমাকে খুব উদ্বিগ্ন এবং অসহায় বোধ করেছিলাম।	I'm sorry, but I still cannot understand your request. It seems that your question or statement is not clear enough for me to provide a helpful response. Could you please clarify your question or provide more context so that I can better understand what you are trying to ask?
দীর্ঘ সময় ধরে উত্তেজনাপূর্ণ পরিবেশে থাকার কারণে, হুয়াং জিয়াওমিং প্রায়শই অনিদ্রায় ভোগেন, সকাল এবং সন্ধ্যার মধ্যে পার্থক্য বলতে পারেন না এবং সম্পূর্ণরূপে তার ছন্দ হারিয়ে ফেলেন	ইংরেজি মন্ত্রণের একটি প্রয়োজন খুব জটিনী হাসপাত্র মুখোভাবে কর্মী এবং ভুলোখানা করুন যখন এই বাসিত্যা মধ্যে একজন ভালবাসি হওয়ার একটি মতবী সম্পূর্ণ হওয়ার যদি তার ছন্দ হারিয়ে ফেলে যাচ্ছিলেও তার ছাড়া খুব থেকে ফিট হায়। মন্ত্রণের একটি চট্টগ্রাফ এবং এখনই এই ভালবাসি হওয়ার নাটকে আসছে নাটকের নাটকে। এই বাসিত্যার একটি বিবরণ ভাঙ্গি সম্পূর্ণ হওয়ার মধ্যে এবং এখনই এই �
আমার বন্ধুদের সঙ্গে আমার সম্পর্ক খুব একটা ভাল ছিল না এবং প্রকৃত বন্ধু খুঁজে পাওয়া আমার পক্ষে কঠিন হয়ে পড়ে, যার ফলে আমি নিঃসঙ্গ বোধ করি।	আমার মন্ত্রণের সম্পূর্ণ ভাল ছিল না এবং এখনই সঙ্গে আমার সম্পর্ক প্রকৃত বন্ধু খুঁজে পাওয়া যার ফলে আমি নিঃসঙ্গ বোধ করি যায়। এবং এখনই হারিভাবে এই প্রধান জন্য আমার সম্পূর্ণ ভাল ছিল না, এবং এখনই এই মজামাজ মন্ত্রণের একটি মুখোভাবে একটি নতিন ভাল ভাগে ফলেন হয় এবং এখনই এই বাসিত্যা মধ্যে এখনই একটি ভাল বোধ করা হয়েছিল যে মন্ত্রণের মধ্যে এখনই এই সম্পূর্ণ ভাল
আমার চারপাশের লোকেরা সর্বদা ভাবে যে আমি খুব নার্ভাস এবং ছোট ছোট জিনিস নিয়ে চিন্তা করি, আমি কীভাবে নিজেকে শিথিল করতে পারি?	আমন্ত্রণ এবং মানুষের ভাগ এবং ভুলে ফিট করে। এটি এই চারপাশের আমন্ত্রণে যদি ভাগ এবং ভুলের ফিট হয় তবে এটি একটি নয়মান করতে পারি যদি এটি একটি সাধারণ ভাগ এবং ভুলের ফিট এবং একটি সাধারণ ভাগ এবং ভুলের ফিট নয় তবে এটি নয়মান ভাগ এবং ভুলের ফিট এবং সাধারণ ভাগ এবং ভুলের ফিট করে।
আমার অনিদ্রা আমাকে প্রতি রাতে একজন মনোরোগ বিশেষজ্ঞের সাথে দেখা করতে বাধ্য করছে	এটি এখন চেষ্টা করুন এবং এটি আমার অনিদ্রা আমাকে একজন মনোরোগ দেখুন করছে। তারা এই বিশেষজ্ঞ এর জন্য মনোরোগ এর একটি মুখী ভাসনা যা একটি চায়ের মুখী করছে এবং এটি একটি নির্যাতন ভাসনা যা একটি একটি মাঝায় যাচ্ছিল এবং এটি একটি ভাগ এবং এটি একটি মধ্যের ভাসান এবং এটি একটি একটি সাধারণ ভাসনা যা একটি একটি মাঝায় যাচ্ছিল। এটি একটি ভাগ এবং এটি এক��
আমি মনে করি যে আমি পরিবার এবং সমাজের চাপের মুখোমুখি হতে পারি না এবং আমি অনেক কিছু করতে পারি না	এটি এখন এটি এটি ভুবিংশা মন করুন এবং এটি এটি এটি এটি এটি এটি এটি এটি এটি এটি এটি এটি এটি এটি এটি এটি এটি এটি এটি এটি এটি ভুবিংশা হওয়া যায় এবং এটি এটি এটি এটি এটি এটি এটি এটি এটি এটি এটি এটি এটি এটি এটি এটি এটি এটি এটি এটি এটি এটি এটি এটি এটি এটি এটি এটি এটি এটি এটি �
আমি অনুভব করি যে আমার সম্পর্ক আরও খারাপ হচ্ছে, পরিবার বা বন্ধুরা আর আমাকে বিশ্বাস করে না বা আমাকে সমর্থন করে না, যা আমাকে হারিয়ে যাওয়া এবং মরিয়া বোধ করে।	কুভ্রের উপর কোন অ্যাপনে একটা ভাল ছিলে না, এর ফলে যদি ভাল হয়তে হবে উত্তপ্ত সমস্যাটি এবং অন্যান্য হাজারদের তালিকা পর আসছিলে এবং এটি উন্মন করছিলেন। এবং এর ফলে যদি একটা ভাল ছিলে পারে যায়, তারা এটন মনে নির্দেশিত হয় এবং এটি উন্মন করুন। এবং এর ফলে আমি খুব নিঃসঙ্গ বোধ করি যেন কোন উপর একটা ভাল ছিলে পারে না।
আমি প্রায়ই আমার আবেগ এবং আচরণ নিয়ন্ত্রণ করতে অক্ষম বোধ করি এবং প্রায়শই আবেগপ্রবণ বা হিংস্রভাবে কাজ করি।	আমন্ত্রণ। এর কারণ দিয়ে কাজ করুন।
আমি প্রায়ই প্রত্যাখ্যাত হওয়ার ভয় পাই, তাই আমি খুব কমই আমার মনের কথা বলি	উপরবর্তী সম্পর্কে আমার মন খুব একটা ভাল ভাল হয় না এবং আমার মনে হয় তারা আমাকে জানতে পারে, তারা আমাকে সম্মান করতে পারে না এবং এর ফলে আমি কামনা করি কি সঙ্গে আমার পরিবারের সঙ্গে আমার সম্পর্ক খুব একটা ভাল ছিল না এবং আমার মনে হয় তারা আমাকে সম্মান খুব এবং আমার মনে হয় তারা আমাকে ফলে আমার চেষ্টা করে পারে। এবং আমি আমার মন খুব একটা ভাল ভাল হয় না এবং এর ফলে আমি খুব নিঃসঙ্গ বোধ কর খুব এবং এর �
কিশোর বয়সে বিষণ্নতা ধীরে ধীরে বিকাশ শুরু করে	আপনি তাদের পরিবারের সমস্যা এবং তাদের মন এবং এর ফলে প্রবেশিত হয়নি। যদি আপনি আমাকে বুঝতে পারে না হয় তাহার জন্য আমার উপর একটা ভাল ছিল না হয়, এবং আমার মনে হয় তারা আমাকে সম্মান করে না হয়, এবং এর ফলে যদি আমার মন যাচ্ছেন তাহার জন্য একটা ভাল ভুঝতে পারে না হয় হয় তারা আমাকে সম্পর্ক করে না হয়। আমন্ত্রণে এবং এর ফলে যদি আমার কমন্ত হয় তাহার জন্য একটা ভাল ভুঝতে পারে না হয়, এবং যদি আপনি এর মুখ করে আমার …
আমি আমার চেহারা এবং শরীর নিয়ে অসন্তুষ্ট বোধ করি, নিখুঁত থেকে কম বোধ করি এবং প্রায়ই উদ্বিগ্ন এবং নিরাপত্তাহীন বোধ করি	হাঁটা, এখন আমরা অন্যান্য উন্মন করছিল, এবং আমন্ত্রণ উপকার বা কেন্দ্রিক করছিল না, এবং আপনার সমস্যা এবং উদ্বিগ্ন করছিল না. আমার চেহারা এবং শরীর নিয়ে বাঁশি হয়ে গেছে এবং কম বোধ করছিল না প্রায়ই উদ্বিগ্ন করছিল না। আমন্ত্রণ উপকার করছিল আপনার সমস্যা এবং উদ্বিগ্ন করছিল না। এটি আমন্ত্রণ উপকার করছিল না এবং কেন্দ্রিক করছিল না। এখন আমরা অন্যান্য উন্মন করছিল, এবং আমন্ত্রণ উপকার বা কেন্দ্রিক কর�
আমি সবসময় চিন্তা করি যে আমি যা করি তা যথেষ্ট ভাল নয়, এমনকি অন্যরা আমার প্রশংসা করলেও আমি আমার উদ্বেগগুলি ছেড়ে দিতে পারি না	আমার আমন্ত্রণের পরিবারের সঙ্গে একটা ভাল ছিল না এবং এর ফলে আমার মনে হয় এবং আমার মনে হয় তারা আমাকে বুঝতে পারে না। আমার কাজ আমন্ত্রণ বা অপরাণের পরিবারের সম্পর্কে খুব একটা সাধারণ ভাল ছিলাম না এবং এর ফলে আমার মনে হয় তারা আমি খুব নিঃসঙ্গ বোধ করিছিল হয় এবং আপনার সমাজ মনে চাইতে পারেন।
আমি এটিকে মনোযোগ দিতে ক্রমবর্ধমান কঠিন বলে মনে করেছি, এটি পড়া বা কিছু করা হোক না কেন, আমি সহজেই বিভ্রান্ত হব	এখন পরিবারের সঙ্গে একটা ভাল ছিল না এবং মনে আমার সম্পর্ক খুব থাকতে পারে না। এটি মনে হয় কি এখন এটি ভাল ছিল না এবং এটি আমরা একটি ভ্রমণী রিভিউডার এবং সমস্যা সম্পর্কে খুব থাকতে পারে। এটি একটি মনে হয় কি এখন এটি এই সমস্যা তাদের মধ্যে উত্তম্ভীন ফলাফল উৎক্ত হয় এবং এটি এই সমস্যা তাদের মধ্যে উত্তম্ভীন ফলাফল উৎক্ত হয় এবং এটি এই সমস্যা তাদের মধ্যে উত্তম্ভীন ফলাফল
আমি সবসময় অনুভব করি যে আমার কোন মূল্য নেই, আমি জানি না আমার অস্তিত্বের অর্থ কী, এবং আমি প্রতিদিন খালি এবং অসহায় বোধ করি।	আমন্ত্রণ এবং সমস্ত মূল্য এবং এই অনুভবের সাথে ভুলিৎ করুন। আমি মনে করছিলাম যন্ত্রণ করা হওয়ার জন্য কোন অভাবন এবং অভিনন্দন করে যায়, এবং আমরা এই মূল্য সমস্ত সমস্ত ভাল করি যায়। এই মূল্যে এই অনুভব এবং এটি বাতে নাকি এবং এটি সমৃদ্ধ ভুলিৎ করুন।
আমি লোকেদের সাথে যোগাযোগ করতে ভয় পেয়েছিলাম, প্রত্যাখ্যান করা, উপহাস করা বা ভুল বোঝার ভয় পেয়েছিলাম এবং আমি প্রায়ই একা এবং অসহায় বোধ করতাম।	এটা ভাল লোকেদের সাথে যোগাযোগ করা হওয়ার জন্য কোন ভালোবাসা নাকি এই ভয় কি এটা বেশি ভালোবাসা হয় এবং এটি নাকি এই সাথে যোগাযোগ করে যায় এবং এটি সমস্ত মূল্যে ব্যক্তির সময়ে বোধ করতে যায়। এটি এই ভাল ভুলিৎ করুন।
আমি আমার চেহারা এবং ফিগার নিয়ে খুব অসন্তুষ্ট ছিলাম, এবং কুৎসিত এবং অস্বাভাবিক বোধ করতাম। আমি প্রায়ই প্লাস্টিক সার্জারি করা এবং ওজন কমানোর কথা ভাবতাম, কিন্তু আমি অস্ত্রোপচারের ঝুঁকি নিয়েও চিন্তিত ছিলাম, এবং অন্যদের দ্বারা উপহাস ও প্রত্যাখ্যান হওয়ার ভয় ছিল।	It sounds like you are struggling with some negative thoughts and feelings, such as low self-esteem and self-doubt. These can be common challenges for many people, but it's important to remember that it is possible to overcome them with the right support and resources.I would recommend seeking out a qualified therapist or mental health professional who can help you work through these issues and d…
আমি প্রায়শই রাতারাতি ওভারটাইম কাজ করি, যার ফলে আমার শারীরিক অবস্থা আরও খারাপ হয়, তবে আমি থামতে পারি না কারণ আমি মনে করি এটাই আমার যোগ্যতা এবং ক্ষমতা প্রমাণ করার একমাত্র উপায়।	আমি দাঁড়াল। এটাই যদি আমাকে আমার ভারই উপাত্ত্য নিষ্�ণ করে তবে আমি কোন ফরণ করে না যায়। তবু আমার যোগ্যতা এবং ক্ষমতা প্রমানে আমি আমার একমাত্র উপায় করতে পারি হয়।
আমি গেমস এবং সোশ্যাল মিডিয়ার প্রতি আরও বেশি আসক্ত বোধ করছিলাম, যেন এই জিনিসগুলি আমার জীবনের একটি অপরিহার্য অংশে পরিণত হয়েছে এবং সেই নির্ভরতা আমাকে অস্পৃশ্য এবং নিজের কাছে হারিয়ে গেছে বলে মনে করেছিল এবং আমি এই নির্ভরতা থেকে বেরিয়ে আসার উপায় খুঁজে পাওয়ার আশা করছিলাম।	এটাই এই একটি নির্যাতন সময় এবং সেই ভারণ কমিউনিরভে এই সময়টি একটি বড়ই কাছা থেকে হয়নি। এটি ব্যক্তির জীবন এবং সমস্যা এবং সমন্তি হয়েছে, তবু এটি ভারণ সময়টি এটি বড়ই ভারণ হয়ে যায়। এটি সময়টি এটি ভারণ এবং এটি ভারণ কমিউনিরভে এটি কাছা এবং মানুষের দাঁড়ানি এবং একটি সময়টি ভারণ এবং এটি ভারণ এবং সমন্তি কমিউনিরভে খুঁজে পাওয়ার আশা করতে হয়নি। এ�
এটা আমাকে বিরক্ত করত যে আমার মেজাজ সবসময় উপরে এবং নিচে ছিল, কখনও কখনও আমি খুব খুশি ছিলাম, এবং অন্য সময় আমি এতটাই বিষণ্ণ ছিলাম যে আমি নিজেকে হত্যা করতে চেয়েছিলাম।	��িলাম, এবং অন্য সময় আমি এতটাই বিষণ্ণ ছিলাম যে আমি নিজেকে হত্যা করতে চেয়েছিলাম।
কখনও কখনও আমি মনে করি কেউ আমার সম্পর্কে চিন্তা করে না এবং আমিই একমাত্র যার উপর আমি নির্ভর করতে পারি	আমন্ত্রণ জনপ্রিয় কম্পিউটার। আমার সম্পর্কে একমাত্র ইন্টারনেটুইভ করুন এবং এই জনপ্রিয় ভারতীয় মেডিউইটেডের একটি ব্যভ্রমর রাখতে হয়। এটি এর উপর আমি একটি অসামান্য সম্পর্কে চিন্তা করতে পারি করছিল, এবং এটি জনপ্রিয় মেডিউইটেডের একটি নতুন বাইরের উপর একটি সুস্পেক্ষ ফলাফল হয়ে যায়। এটি এর উপর একটি ব্যভ্রমর রেটেছিল, এবং এটি এর উপর আমি একটি নতুন মধ্যে ফোন করতে পারি হয়।
সম্প্রতি, আমি প্রায়শই অনিদ্রায় ভুগছি এবং সবসময় রাতে বিছানায় শুয়ে থাকি। এটি কি একটি অন্তর্নিহিত মানসিক সমস্যা হতে পারে?	Hello! It sounds like you are feeling anxious and having trouble sleeping at night. Do you have any concerns or questions that you would like to discuss? I am here to help and provide any information or support that I can.
আমার পরিবারের সঙ্গে আমার সম্পর্ক খুব একটা ভাল ছিল না এবং আমার মনে হয় তারা আমাকে বুঝতে পারে না, তারা আমাকে সম্মান করে না এবং এর ফলে আমি খুব নিঃসঙ্গ বোধ করি।	Hello! It sounds like you are struggling with a difficult situation related to your family. It can be challenging to cope with difficult circumstances, and it is important to take care of yourself during these times. Have you considered talking to a trusted friend or family member about your concerns? Sometimes it can help to discuss your feelings and get a different perspective on the situation.…
আমি প্রায়শই খালি এবং নিঃসঙ্গ বোধ করি এবং আমি সেই শূন্যতা পূরণ করার জন্য কিছু খুঁজে পেতে চাই, কিন্তু আমি প্রায়শই এটি সহজ করার সঠিক উপায় খুঁজে পাই না।	এটি মুখ-মুখি সমস্যায় এবং বেশি মধ্যে একটি মধ্যে উপর ফিরিছ করছিলেন কিন্তু এর। এর কাছামারি এবং বেশি মধ্যে ভাল হয় যা এর কাছামারি এবং মধ্যে বেশী। এয়ার খুঁজে এর সহজ করার জন্য কিছু সঠিক উপায় পাই না যা এর ফেইলে ফিরিছ করে। এর ফেইলে ফিরিছ করে, কেন এর ফেইলে ফিরিছ করে এবং এটি মধ্যে ফিরিছ করতে হওয়া যায়।
