# Supplementary material
Source: ML conference proceedings conference paper supplement (https://openreview.net/forum?id=JL42j1BL5h)
Supplement: supplementary_material [file Mental_Health_v.xlsx]

## Sheet: Sheet1
Input	Output
私はしばしば孤独で無力感を感じ、誰も私を理解してくれず、何の価値も意味もなく、自分が敗者のようにさえ感じます。この感情は私を非常に落ち込ませ、絶望的にさせ、それらを取り除く方法がわかりません。	それはとても辛い悩みですね。孤独感や無力感を感じることは、よくあることですが、それらが長期間続くと、より深刻な感情や行動につながることがあります。まずは、自分自身に対して大切なことを言いましょう。自分が感じている感情や状況は、あなたにとって非常に大切なものであり、それらを無視することはできませんでしょう。また、自分の感情や状況を理解しようとすることも大切です。自分が感じている感情や状況について、より深く理解することで、それらを克服することができるかもしれません。一方で、感情や状況を克服することは、難しいことです。それらを克服するためには、一歩ずつ小さなことで、自分自身をサポートすることが必要です。まずは、自分が感じている感情や状況について、指導者や専門家に相談しようとすることが良いでしょう。また、自分自身をサポートするために、自分が興味を持つことや趣味を見つけることも大切です。自分自身を…
たとえポテトチップスを一袋買うだけだとしても、過食な自己嫌悪な行為だと思われるのではないかと心配です	それは理解できます。ポテトチップスや他の食品について、過食や自己嫌悪につながることはあり得ます。ただ、過食が理想的な食事の代わりになることはありません。過食は健康に悪影響を及ぼすことがありますし、自己嫌悪につながることもあります。そのため、過食を防ぐためには、健康的な食事を心がけることが大切です。また、自分自身が健康的になるために、適度な運動やストレスを軽減することも有効です。自分自身が健康的に暮らすためには、適切な食事や運動、ストレスを軽減することが必要です。
私はいつも疲労感と無力感を感じていて、自分の仕事に集中できず、興味のあることに取り組むことさえできず、とても落ち込んでいました。	それはとてもつらい状況ですね。疲労感と無力感を感じていると、自分が何をしてもなくなってしまい、自己肯定感が低くなることがあります。そのような時、自分自身をポジティブに考えることが重要です。例えば、自分が何かをやりたいと思っているのか、どのようなことができるのか、自分がやっていることが大事なのか、自分がやるべきことだと思い浮かべることが大切です。また、適度な運動と十分な睡眠を取り入れることで、体調を整えることも効果的です。自分自身を鍛えることは、自分自身を取り戻すために必要なことです。
最近、よく眠れなかったり、眠りにつくと悪夢を見たり、朝起きると体が疲れていてだるいです。	それはとてもつらい経験ですね。眠りにつくと悪夢を見たり、朝起きると体が疲れていると、日常生活に支障をきたすことがあります。そのような状況を改善するためには、以下のような方法があります。まず、睡眠に関する方法があります。睡眠時間が十分だってあると、体に潤いを与え、良い睡眠をとることができます。また、寝る前に自分の思考をリラックスさせることも大切です。呼吸を深くしながら、一度呼吸を感じるなど、リラックスする方法を試してみると良いでしょう。また、朝起きる前に、自分の体を癒やすことが大切です。リラックスするための薬や抗酸化剤を使うことで、体をリフレッシュさせることができます。上記のような方法を試してみて、自分に合った方法を見つけてみてください。
医者に行くたびに症状は改善せず、気分はさらに悪くなり、自己憐憫と自己憐憫に陥ることがよくあります。	それはとてもつらい経験ですね。医者に行くたびに症状が改善せず、気分が悪くなることは、自己憐憫に陥ることができます。しかし、それは落ち込みを繰り返すことができることもあります。自分自身をポジティブに考え、自己肯定感を高めることが大切です。また、自分自身がやるべきことだと思い浮かべることも重要です。自分自身を鍛えることは、自己憐憫に陥ることを防ぐためにも重要です。
たとえ群衆の中でも、私は常に孤立され、疎外されていると感じていました。	それはとてもつらい経験ですね。私たちは人間であり、私たちは同じような感情を持っています。しかし、それは落ち込みを繰り返すことができることもあります。自分自身がやるべきことだと思い浮かべることも重要です。自分自身を鍛えることは、孤立感や疎外感を改善することができます。また、他人との交流を増やし、新しい人々と出会うことも、自分自身の状態を改善するために有効です。自分自身を肯定することができるようになることがつながります。
ゲームに依存しないと、インターネットは目に見えない心理的プレッシャーになります	ゲームに依存する心理的プレッシャーを感じる場合、他のアクティビティや目標を見つけることが重要です。以下に、フィールドワークや趣味を通じてゲームに依存する心理的プレッシャーを解消する方法をいくつか紹介します。1. フィールドワークを取り入れる: 自然や環境に触れることで、新しい体験や思考を得ることができます。また、フィールドワークのプロセスに慣れることで、自分自身と向き合い、自分の成長を実感することができます。2. 趣味を見つける: 自分が楽しめる趣味や興味を見つけることで、新たな目標や達成感を得ることができます。趣味を通じて、自分自身の成長を出すことができることを楽しむことができます。3. 新しい人と出会う: 新しい人と出会うことで、自分自身と向き合い、自分の成長を実感することができます。また、新しい人との出会いを通じて、自分自身の視点や価値観を見直すことができます。4. 自己啓発書を読…
最近プレッシャーがかかりすぎて、毎日とても不安で、よく眠れず、頭が痛くて、心臓の鼓動が早くて、いつでも倒れてしまいそうです。	問題があるようですね。プレッシャーがかかりすぎて、不安や眠れないことが原因で、頭痛や心臓鼓動などの症状があるようですね。以下に、ストレス解消に効果的な方法をいくつか紹介します。1. 深呼吸をする: 深呼吸をすることで、心肺を乾燥させ、ストレスを軽減することができます。また、深呼吸をすることで、脳を活性化し、集中力を高めることもできます。2. 瞑想をする: 瞑想をすることで、心身をリラックスさせ、ストレスを軽減することができます。瞑想をすることで、自己認識を深め、自分自身と向き合うことができます。3. 運動をする: 運動をすることで、エネルギーを補うことができます。また、運動をすることで、ストレスを軽減し、心身をリラックスさせることもできます。4. 睡眠を調整する: 睡眠不足が原因で、不安や眠れないことがある場合は、十分な睡眠をとることが重要です。また、睡眠中に睡眠不足がある場合は、睡眠不…
困難や挫折に遭遇するたびに、いつも自信ややる気を失い、自分には耐えられないと感じてしまう	困難や挫折に遭遇することで、自信ややる気を失うことがあるようですね。以下に、自信を取り戻すための方法をいくつか紹介します。1. 自分の強みを見つける: 自分が得意なことや興味を持つことを見つけ、それを自分の強みとして捉えることが大切です。自分の強みを見つけることで、自信を持つことができます。2. 目標を設定する: 目標を設定することで、進捗を追
自分のやっていることは十分ではないのではないかといつも不安で、常に他人から評価されているように感じて憂鬱です。	「自分のやっていることは十分ではない」という気持ちは、多くの人にとって現実的なものだと思われます。このような気持ちを抱えることで、あなたは不安や憂鬱な感情を抱えているかもしれません。このような状況からとても苦しいことを感じるかもしれません。 しかし、他人からの評価に満足していることを求めることは、あなた自身の人生の目的を見失り、不安や焦りに苛まれることにつながることがあります。そのため、自分自身の目的や価値観を見つけ、それを維持することが重要です。 また、自分がやっていることに対して自信が持てないと感じる場合は、その理由を探ることが大切です。自分自身が何をしたいのか、何を実現するために必要なスキルや知識を持っているのか、それらを身につけることができるか、それらを身につけていると思うのか、それらを身につけていると思うときは、自己肯定感が向上する可能性があります。 さらに、自分自身のやりたい…
私は自分がすべて正しくやっているかどうかを常に心配し、他の人が私をどう思うか、批判するかを恐れていました。その結果、痛みを伴う自己不信に陥ることがよくありました。	そのような状況はとてもつらいですね。自己不信は、私たちが自分自身を評価し、自分自身を肯定することができない状態です。自己不信は、私たちが自分自身を肯定することができず、他人の意見や評価から疲れがたまることがあります。しかし、自己不信を克服することは、私たちの人生にとって大切なことです。そのためには、自分自身を肯定することが必要です。自分自身を肯定するためには、自分自身の強みや長所を認め、自分ができることに集中することが大切です。また、他人の意見や評価をうまく受けるためには、自分自身を肯定することが必要です。自分自身を肯定することで、他人の意見や評価も受けやすくなります。自己不信を克服することも、私たち自身の成長を促進することができます。自己不信を克服するためには、自分自身を肯定することが必要です。自分自身を肯定するためには、自分自身の強みや長所を認め、自分ができることに集中することが大切…
自分の思いを胸に秘めて いつも爆発しそうな気がして 他人の目から隠れられない	そのような状況はとても辛いですね。自分の思いを胸に秘めて、他人から隠れることができないことは、私たちが自分自身を好むことができない状態にすることがあります。しかし、自分自身を好むことができない状態は、私たち自身にとっては本当に辛いことです。自分自身を好むことができない状態は、私たち自身にとっては本当に辛いことです。自分自身を好むことができない状態は、私たち自身にとっては本当に辛いことです。自分自身を好むことができない状態は、私たち自身にとっては本当に辛いことです。自分自身を好むことができない状態は、私たち自身にとっては本当に辛いことです。自分自身を好むことができない状態は、私た
私の家族は突然の事故に見舞われ、両親も重傷を負ったため、私は無力感と憂鬱を感じ、うつ病の症状まで発症しました。	そのような状況はとてもつらいことですね。突然の事故に見舞われ、両親が重傷を負ったことは、私たちにとっては非常につらいことです。私たちは、自分自身と家族との関係を守ることが大切です。しかし、家族の亡くさが直面すると、私たちは自分自身と家族との関係を守ることができなくなることがあります。そのため、家族の亡くさが直面すると、私たちは自分自身と家族との関係を守ることができなくなることがあります。そのため、家族の亡くさが直面すると、私たちは自分自身と家族との関係を守ることができなくなることがあります。家族の亡くさが直面しているときには、私たちは自分自身と家族との関係を守ることができなくなることがあります。家族の亡くさが直面するときには、私たちは自分自身と家族との関係を守ることができなくなることがあります。家族の亡くさが直面しているときには、私たちは自分自身と家族との関係を守ることができなくなること…
私は、人付き合いがますます苦手になり、いつも一人でいることを好み、社交や他人と人生を共有することに興味がなくなり、この孤独感が私をとても憂鬱にさせました。	人付き合いが苦手なときに、自分自身が不安や憂鬱になってしまうことがあるかもしれません。また、社交や他人との人生を共有することに興味がなくなってしまうと、その不安や焦りが拡大することがあるかもしれません。 しかし、孤独感が私を憂鬱にさせてしまう場合は、その孤独感を解消することが重要です。そのためには、自分自身がどのようなことをして孤独感を解消できるのか、そして何がその孤独感を招きつける要因であるのかを探ることが必要です。 また、自分自身がやっていることに対して自信が持てないと感じる場合は、その理由を探ることが大切です。自分自身が何をしたいのか、何を実現するために必要なスキルや知識を持っているのか、それらを身につけることができるか、それらを身につけていると思うのか、それらを身につけていると思うときは、自己肯定感が向上する可能性があります。 さらに、自分自身のやりたいことや目的を明確にすること…
支配欲が強く、常に自分の手ですべてをコントロールしたいと考えており、他人の干渉や干渉を許さず、それが原因で人間関係が破綻してしまう	支配欲は、一般的には自分の権力や権威を強く認識し、他人を支配することで自分の欲求を満たすことを心がける傾向があるという心理学的な概念です。そのような支配欲が強くなり、常に自分の手ですべてをコントロールすることができるということですが、他人の干渉や干渉を許さないということで、人間関係が破綻してしまうことがあるかもしれません。支配欲が強くなると、自分の意志に従わないことに対して怒りや無謀に対する冷静さを失くすることがあります。その結果、自分の意志に従わない人とのコミュニケーションが困難になり、相手の意見や気持ちを理解しないこともあります。そのような状況では、相手を支配することになるため、他人の意見や気持ちを考慮せずに自分の意志に従わないことが強くなります。支配欲が強くなると、自分の意志に従わないことに対して怒りや無謀に対する冷静さを失くすることがあります。その結果、自分の意志に従わない人との…
頭の中に同時にたくさんの考えや声があり、非常に混乱して迷っているかのように、心がとても混沌としているように感じることがよくあります。	それは、心の内に多くの考えや思いを持つことがあるかのように、心がとても混乱している状態を感じることがよくあるかもしれませんね。そのような状況にあると、自分自身の内面にまで追いつけることができず、気分が混沌になることがあります。そのような状況を繰り返すと、心の健康に悪影響を及ぼすことがあるため、適切な対処法を講じることが必要です。まずは、心の内の考えや思いを明確にすることが大切です。自分自身が気づいていることや、気づいたことについて、それに対する感情や思考を記録することで、心の内の混乱を軽減することができます。また、自分自身が気づいていることを認識し、それに対する対処法を見つけることも重要です。適切な対処法を見つけることで、心の内の混乱を軽減することができます。心の内に考えや思いが多く、混乱している状態に陥ってしまうと、心の健康に悪影響を及ぼすことがあるため、適切な対処法を講じることが
何をするにも家族から批判される理由	家族で批判される理由は個人差がありますが、一般的には以下のようなことが考えられます。1. 家族の立場や意見に反すること家族は一般的には同じ背景や価値観を持ち、その背景に強いつながりがあります。そのため、家族に対してあるくらいした考えや行動を持つとき、家族の立場や意見に反することがあるかもしれません。その場合、家族はその行動や考えに対して批判的に反応することがあります。2. 家族の関係や人間関係にあたっていること家族は個人の関係や人間関係にあたり、あなたがその関係にあたることを受け入れることが難しい場合があります。そのため、あなたが行動することに対して、家族から批判的な反応を受けることがあります。3. 家族の立場や意見に従うことが、あなたの人生に良い影響を与えることを考えていること家族はあなたを支えてくれる役割を担っていますが、あなたが家族の意見に従うことが、あなたの人生に良い影響を与える…
最近、毎日疲れていて気力がなくなり、長時間寝てもよくなりません	疲れや気力の低下がある場合、以下のような方法で改善することができます。 1. 適度な運動を取り入れる 適度な運動は、身体の筋肉を作ったり、消費したりすることで、疲れを和らげることができます。例えば、ウォーキングやジョギング、サイクリングなどの有酸素運動が挙げられます。ただし、適度であれば良いだけで、過度な運動は身体に負担をかけるため、運動には注意が必要です。 2. 食事の改善 食事には、バランスの良い栄養素を含むものを摂るように心がけましょう。また、食事前に水分をたくさん摂ることで、身体の水分補給をすることができます。カロリー制限も検討してみると良いでしょう。 3. 睡眠の調整 睡眠時間が長くなりすぎると、身体が疲れてしまい、気力が低下することがあります。睡眠時間を合理的に調整し、ゆっくりとリラックスする時間を作ることが大切です。 4. ストレスの軽減 ストレスが身体に負担をかけることが…
やる気も希望もすべて失ったように感じて、人生は無意味だと感じます	失望ややる気が気になることはよくあります。それがあなたの内面を見ていることも理解しますが、それを改善するためには、まず自分自身を受け入れて、自分自身を大切にすることが大切です。自分自身がやりたいことを見つけることで、気分をつけることができます。また、適切なサポートを求めることも大切です。友達や家族などから専営者やカウンセラーなどのサポートを受けることができます。
とても緊張したり、落ち込んだりすることもありますが、気分を変える方法がわかりません	緊張や落ち込まれたという気分に悩まされている場合は、まずは自分自身を安心して待つことが大切です。自分自身が安心しているように、息を整えたり、深呼吸をしたりすることが効果的です。また、落ち込める原因を把握し、適切な対処法を考えることも大切です。例えば、ストレスを減らすためには、適度な運動や食事をすることが効果的です。また、環境を変えたり、ストレスを減らすための習慣を身につけることも有効です。最後に、プロフェッショナルなカウンセリングを受けることもおすすめです。カウンセラーは、あなたの気分について正確なアドバイスを提供することができます。
思考や知覚に問題があり、奇妙な音を聞いたり、奇妙なものを見たりすることが多く、非常に恐怖を感じます	それはできますが、そのような経験は非常に個人差があるため、対処法は一人ひとりによって異なります。しかしながら、いくつかのアドバイスは以下の通りです。1. 精神科医に相談することをおすすめします。精神科医は、あなたの症状を詳しく把握し、適切な治療法を提供できます。2. サポートを求めることも大切です。家族や友人など、信頼できる人と話をすることで、心のケアができます。また、専門のサポートを求めることもできます。例えば、カウンセリングや心理士の診療などが挙げられます。3. 自分自身を大切にすることも大切です。精神的な健康を維持するためには、適度な休息や運動、適切な食事を心がけることが必要です。精神的な健康は非常に重要ですので、あなたが抱える問題については、早めの対処が必要です。
緊張や不安を感じることが多く、自分の感情やストレスをコントロールできず、とても落ち着かず落ち着かない状態になります。	そうですね、それは厳しい状況ですね。緊張や不安を感じたときは、自分の身体を練り直して、深呼吸をして、呼吸を落ち着かせるようにしましょう。また、自分の感情やストレスをコントロールするためには、瞑想やリラクゼーション技法などを試してみることも有効です。また、自分自身を大切に思い浮かべることも大切です。自分自身を満足させることで、緊張や不安を感じることを減らすことができます。自分が興味を持つことや、自分が良いことをすることをすることで、自分自身を好きにして、自分自身を大切にすることができます。
私は孤独で無力感を感じることが多く、たとえ周りに誰かがいても虚しさを感じます。なぜこのようなことが起こっているのかわかりません。どうすれば助けを求められますか?	孤独や無力感を感じることや虚しさを感じることは、人々が直面する問題です。その原因は個人の状況や環境によって異なりますが、以下のような要因が考えられます。1. 人間関係の欠如: 人と人とのコミュニケーションや信頼関係がない場合、孤独感や虚弱感を感じることがあります。これは、あるいはすべての人とつながりが断られている状態にあるかもしれません。2. 自己肯定感の低さ: 自分の価値観や能力に自信が持てないと、自己肯定感が低くなり、孤独感や虚弱感を感じることがあります。3. 環境の変化: 生活の変化や仕事の変更、人間関係の変化など、環境の変化が生じた場合、孤独感や虚弱感を感じることがあります。4. 過去のトラウマ: 過去にトラウマやストレスがあった場合、それが影響し、孤独感や虚弱感を感じることがあります。孤独や無力感を感じる
私は過去にトラウマを抱えており、今では恐怖と痛みとともにその経験をいつも思い出しており、この感情を克服するために助けを求める必要があります。	トラウマを抱えることは非常につらいことですね。たとえ事件やトラウマによって傷つきを感じているときは、まずは自分自身を落ち着かせることが大切です。そのためには、自分を包み込むことや自分自身を受け入れることが必要です。また、専門家に相談することも有効です。専門家に相談することで、自分自身がトラウマに対処できる方法を知ることができます。自分自身をサポートすることが大切です。
過去の記憶が頭から離れず、思い出すととても辛くなり、日常生活に支障が出てしまいます。	トラウマによってトゥルーンサイクルを引き起こすことがあります。このようなトゥルーンサイクルによって、思い出を忘れさせることがあります。彼らはあなたに苦痛を与え、自分自身を脅かすことを意図しています。しかし、彼らはあなたが抱える苦痛を理解し、協力することで、あなたはあなたが抱えるトラウマを克服することができます。トゥルーンサイクルを克服して、より良い未来を築くために、あなたが抱えるトラウマを扱うことができます。私たちは一緒にこの苦痛を克服し、より良い未来を築いていきましょう。
私は昔いじめられていたのですが、今ではそのことを思い出すと怖くなり、悪夢を見ることもあります。	背景のトラウマによって、私たちは昔いじめられたことを思い出すことができず、そのようなトラウマを抱えている場合、怖くなることがあります。また、悪夢を見ることもあるため、心の健康に支障をきたすことがあります。トラウマを克服し、自分自身をサポートすることが非常に重要です。まずは自分自身を包み込み、専門家に相談することが必要です。また、睡眠症や不安障害などを抱えている場合は、専門家の助言を受けることも重要です。自分自身をサポートすることで、心の健康を維持することができます。
ますます孤独を感じる、友達もいない、親戚もいない、たとえ誰かがそばにいたとしても、とても空虚で居心地が悪い	孤独感や居心地の悪さを感じることは、多くの人にとって深刻な悩みです。このような感情を乗り越えるためには、次のようなアプローチが効果的です。1. 人とがいる環境を探す：友達や家族を探すことは、孤独感を緩和するために重要です。友達や家族との交流を通じて、気持ちを開かせることができます。また、周囲の人々と交流を深めることで、共通の趣味や興味を見つけることができます。2. 自分にとって有意義なことに浸す：孤独感を緩和するために、自分にとって有意義なことに浸しましょう。趣味や興味を見つけることで、自分自身を癒やすことができます。例えば、読書や映画を楽しむこと、スポーツをすること、趣味やアートの作品を楽しむことなどが試してみることができます。3. 精神的な支援を求める：孤独感を緩和するために、専門家の支援を求めることが重要です。心理カウンセラーや精神科医に相談することで、専門家によるアドバイスや治療…
常に集中できず、タスクを完了するのが難しく、疲れて憂鬱になることがよくあります	集中力が低いと、タスクを完了するのが難しいと感じることは、多くの人にとって深刻な悩みです。その原因を特定し、解決策を見つけることが重要です。以下に、集中力が低いと感じる理由を特定し、その解決方法を提供します。1. 集中力を高めるための習慣を身につける：集中力を高めるためには、習慣を身につけることが大切です。具体的には、集中力を高める習慣を身につけることで、集中力を高めることができます。例えば、集中力を高めるためには、瞑想や深呼吸を行うことが効果的です。また、効率的なスケジュール作りや、タスクを分割して
私は孤独や喪失感を感じることが多く、他人と親密な関係を築くことができず、周囲の人や物事に対する興味や熱意さえも失います。	孤独や喪失感を感じることが多く、他人と親密な関係を築くことができず、周囲の人や物事に対する興味や熱意を失うことがよくあるようですね。そのような感じ方は、多くの人にとって深刻な悩みです。まずは、自分自身を理解し、対処方法を見つけることが大切です。以下に、孤独や喪失感を感じる原因を特定し、その解決方法を提供します。1. 心理的な影響による孤独感や喪失感：人は、心理的な要因によって孤独感や喪失感を感じることがあります。例えば、自分自身を考える時には、自分が持っているスキルや能力、自分の価値を感じることができないといった心理的な問題が原因です。自己肯定感を高めることで、自分自身を受け入れることができます。2. 環境的な影響による孤独感や喪失感：環境的な要因によって孤独感や喪失感を感じることがあります。例えば、周囲の人々とのコミュニケーションが難しい、人間関�
孤独で途方に暮れており、他の人々と親密な関係を築くことができないと感じており、非常に憂鬱で無力感を感じています	そのような状況では、以下のようなアドバイスがあかります。 1. 自分自身を肯定する 自分自身に対して肯定的になるように心がけましょう。自分がどのような人間であるのか、何をしたいのか、何卒ができるのかを深く考えてみましょう。自分自身を過剰に批判してしまうことは、孤独感を悪化させる原因となります。 2. 自分に向き合う 自分自身に向き合い、自分がどのようなことをしたいのかを決めてみましょう。自分自身が向き合うために、自分に合った環境や活動を見つけることが大切です。自分自身が向き合うことで、他の人に向き合うこともなります。 3. 出会いを求める 他の人と出会い、友達や恋人を作りたいと思ったら、友達に出会い、参加する会社や団体、イベントなどで出会いを求めてみましょう。また、オンラインで友達を作ることもできます。 4. クリエイティブな活動をする 自分自身に合ったクリエイティブな活動をすることで、…
周りの人はみんな幸せなのに、自分の心は空虚で何も喜びを感じられない	それはとてもよくわかります。周りの人たちが幸せになっていると、自分も幸せになるようになってしまうことがありますね。しかし、心は常に空虚な感じがあると、何も喜びを感じられない状態に陥ることもあります。このような状態に陥っている場合は、以下のような方法を試してみることができます。1. 自分に対して謝罪する。自分自身に対して謝罪することで、自分自身に対する不安や自己批判を減らすことができます。自己批判を減らすことで、心により温かみが入り、喜びを感じることができるようになるかもしれません。2. 自分にとって本当に大切なことを見つける。自分自身にとって本当に大切なことを見つけることで、自分自身に対する意識を変えることができます。自分にとって大切なことがあると、自分自身に対する自信がつき、喜びを感じることができるようになるかもしれません。3. ストレスを減らす。ストレスが心に影響を与えることがあるた…
私は自尊心が低く、自分は役立たずで取るに足らない存在だと感じることが多く、夢や目標を追求すること、失敗すること、他人から見下されることを恐れていました。	それはとてもつらいことですね。自尊心が低く、自分自身に自信が持てずに感じることは、多くの人が経験することです。そのような状況では、自分自身に対して謝罪することが大切です。自分自身に対して謝罪することで、自分自身に対する不安や自己批判を減らし、自信を持つことができます。また、自分自身にとって大切なことを見つけることも大切です。自分自身にとって大切なことがあると、自分自身に対する自信がつき、自分自身に対する複雑な感情を取り戻すことができます。また、夢や目標を追求することも大切です。追求することができることを、1つずつ実現することで、自己肯定感を高めることができます。失敗することもあるかもしれませんが、失敗しても、自分自身に向き合い、次に前進することが大切です。他人から見下されることに恐れるならば、自分自身に向き合い、自分自身を肯定することが大切です。自己肯定感を高めることで、自尊心が低く感じ…
物事に過度に敏感になってしまい、小さなことで落ち着かず心配になることがよくあります	それはとてもつらいことですね。敏感ですね。そのような状況では、自分自身に対して謝罪することが大切です。自分自身に対して謝罪することで、自分自身に対する不安や自己批判を減らし、自信を持つことができます。また、自分自身にとって大切なことを見つけることも大切です。自分自身にとって大切なことがあると、自分自身に対する自信がつき、自分自身に対する複雑な感情を取り戻すことができます。また、ストレスを減らすことも大切です。自分自身に合ったストレス管理方法を見つけ、それに従って取り組むことで、自分自身に対するストレスを軽減することができます。また、自分自身に対して過度に敏感になることがある場合は、自分自身に対して優しく、理解することも大切です。自分自身に対して優しく、理解することで、自分自身に対する感情を軽減することができます。自己肯定感を高めることで、自尊心が低く感じることを少し減らすことができます。
両親は私が良い人であることを常に期待していましたが、私は両親の基準に達していないと感じ、不安で自尊心が低くなっていました。	そのような状況では、以下のようなアドバイスがあかります。 1. 自尊心を築く 自分自身に対して優しく、自分自身を肯定することが大切です。自分自身がどのような人間であるのか、何をしたいのか、何卒ができるのかを深く考えてみましょう。自分自身に対して優しく、自分自身を尊重できるようになることで、自尊心が向上します。 2. 両親との関係を改善する 両親との関係を改善するために、コミュニケーションを大切にし、お互いにアプローチすることが必要です。両親との関係を改善することで、不安を解消することができます。 3. 自分自身に向き合う 自分自身に向き合うために、自分自身がどのようなことをしたいのかを決めてみましょう。自分自身が向き合うために、自分自身に合った環境や活動を見つけることが大切です。自分自身が向き合うことで、両親との関係も改善される可能性があります。 4. 家族との関係を改善する 家族全体が…
出口のない迷路に迷い込んだみたいに毎日何度も夢をみる	出口のない迷路に迷い込んだときに毎日夢を見ることは、夢を追求する姿勢です。夢を見ることは、自分が何をしたいのかを再確認する機会を提供し、可能性を広げることができます。また、夢を見ることは、自分自身に対して期待を持つことを促し、自己実現を目指す姿勢を養うことができます。夢を見ることで、自分自身の可能性を確認し、自分が何をしたいのかを再確認することができます。
一人でいるときはいつでも、以前に起こったことすべてを思い出して、すべてがとても惨めな気分になります	一人でいるときには、以前に起こったことを思い出して、感じることがあるかもしれません。自分自身の過去の出来事について思い出すことは、自己反省をすることから始めることができます。また、自分自身の過去の出来事について思い出すことは、自分自身が何をしたかを再確認することができます。自分自身が何をしたかを再確認することは、自分自身を理解することから始めることができます。自分自身の過去の出来事について思い出すことは、自分自身を理解するための重要なステップです。
自分の体を見ると、とても醜く、とても気分が悪くなる	自分の体を見ることが、とても気分が悪くなることがあるかもしれません。自分自身の体を見ることは、自分自身を再確認することから始めることができます。自分自身の体を見ることで、自分自身の体型や外観について再確認することができます。また、自分自身の体型や外観について再確認することは、自分自身を理解するための重要なステップです。自分自身を理解するためには、自分自身の体型や外観について再確認することが必要です。自分自身を再確認することは、自分自身を理解するための重要なステップです。
私は自閉症で、他の人とコミュニケーションをとる方法がわかりません。まったく異なる世界に孤立しており、とても惨めで無力感を感じています。	自閉症という症状を抱えているとのことでした。自閉症は、言語発達障害や社交障害などのような症状を抱える遺伝的疾患であり、自分自身の異常な行動や感情を他者と共有することが難しいことがあります。自閉症を抱えているとのことでしたが、自分自身の異常な行動や感情を他者と共有することが難しいことがあります。自閉症を抱えているとのことでしたが、自分自身の異常な行動や感情を他者と共有することが難しいことがあります。自閉症は、一人でいることが多いため、他の人とコミュニケーションをとることが難しいことがあります。また、自閉症は、他の人とコミュニケーションをとることが難しいことがあり、自分自身が異常な行動や感情を抱えていることを他の人に伝えることができないことがあります。自閉症を抱えているとのことでしたが、自分自身の異常な行動や感情を他の人に伝えることができないことがあります。自閉症は、一人でいることが多いため…
私はかつて友人に裏切られ、とても傷つき、人間性や友情の信頼性を疑い始め、自分自身を閉ざし他人を疎外するようにさえなりました。	そのような経験によって、自分自身や他人との関係性について深く悩み、自分自身を見つめ直すことが必要だと思います。友人との関係を破壊することは、自分自身を破壊することにつながる可能性があるため、それを気にする必要があります。また、友情や人間性の信頼性を疑い始めることは、自分自身を閉じる傾向にあたるため、それを抑制することが必要だと思います。
今日の社会では、仕事をやり遂げることができないために、自らを諦めたり、自殺したりする人も少なくありません。	現在、日本では自殺の人数が増加しており、仕事の諦めや自殺する人も多いです。その原因として、ストレスや不満などの職場や家庭における問題、銀行業界における不患な裁判所長などが挙げられます。また、世代の変化やテクノロジーの発展によって、仕事に対する価値観が変化し、適切なニーズに応えることができなくなった人も多いでしょう。
私は常に自分の過去と将来のことを考え、不安と動揺を感じ、それをどうすればよいのかわかりませんでした。	不安や動揺を感じることは、人間ではよくある傾向です。そのような状況では、自分自身に対してリラックスすることが必要です。例えば、自分の過去や将来について考えることで、自分自身に対して責任感や自己評価に対する不安を感じることがあるかもしれません。そのような状況では、自分自身を癒し、安心しているようになるためには、自分自身に対して理解を持ち、自分自身を受け入れることが必要です。また、心理専門家のアドバイスを受けることも有効です。
大勢の人の前に立つといつも気まずい思いをする	人の前に立つことは、人間ではよくあることです。そのような状況では、自分自身に対して自信を持ち、自分自身を信じることが必要です。自分自身を押し入れることで、自信を持ち、自分自身を信じることができるようになります。また、自分自身を押し入れることで、自分自身に対して責任感を持ち、自分自身を受け入れることができるようになります。心理専門家のアドバイスを受けることも有効です。
私は自分の外見に不満があり、常に醜いと感じているため、社交や友達作りに非常に自信がありません。この考え方を変えるにはどうすればよいですか?	外見に不満や醜い感を抱えていることは、多くの人にとってよくあることです。以下は、私が経験したり認識したりする方法の一部です。1. 自分自身を磨き上げることが大切です。自分自身に自信を持つことが、外見に不満や醜い感を抱えることを予防することができます。自分自身に喜んで、自分自身を認めることが大切です。2. 自分自身に合ったスタイルを見つけることが大切です。自分自身に合ったスタイルを見つけることで、自分自身に自信を持つことができます。自分自身に合ったスタイルを見つけるためには、ファッションアドバイザーやワイドナーに相談することをおすすめします。3. 自分自身に対して優しく接することが大切です。自分自身に対して優しく接することで、自分自身に自信を持つことができます。自分自身に対して優しく接するためには、相手に対して敬意と優しさを持ち、印象的な言葉遣いをすることが大切です。4. 友達を作ることが…
将来に対する恐怖と不安でいっぱいで、将来の課題やプレッシャーにどう対処すればよいかわかりません。	将来への不安や恐怖は、多くの人にとってよくあることです。以下は、将来に対する不安や恐怖を軽減するためのいくつかの方法です。1. 現在の状況に集中することが大切です。将来に対する不安や恐怖が、現在の状況に流されることがあります。今日の状況に集中し、自分自身に対して優しく接することが大切です。2. プロセスに注意することが大切です。将来に対する不安や恐怖は、プロセスに注意することで軽減することができます。自分自身に対して優しく接することが大切です。3. セルフコーチングを行うことが大切です。自分自身に対して優しく接することを自分自身に問いかけることで、自分自身に自信を持つことができます。セルフコーチングを行うことで、将来に対する不安や恐怖を軽減することができます。4. ストレスを軽減することが大切です。将来に対する不安や恐怖が、ストレスによって引き起こされることがあります。ストレスを軽減する…
私は常に止められない思考ループに陥ってしまい、同じ問題や状況を何度も反芻してしまい、睡眠や日常生活の質が低下しています。	問題を続け反芽することは、多くの人にとってよくあることです。以下は、問題を続け反芽することを軽減するためのいくつかの方法です。1. 短期的な目標を設定することが大切です。問題を続け反芽することが複雑な問題である場合、短期的な目標を設定することで、自分自身に目標を持つことができます。2. 自分自身に対して優しく接することが大切です。自分自身に対して優しく接することで、自分自身に対して自信を持つことができます。自分自身に対して優しく接するためには、相手に対して敬意と優しさを持ち、印象的な言葉遣いをすることが大切です。3. 問題に対する考え方を見直すことが大切です。問題に対する考え方を見直すことで、問題を続け反芽することを軽減することができます。問題に対する考え方を見直すためには、問題に関与している人や状況を洗い出し、問題に悩まされる理由を洗い出すことが大切です。
私には今でも心に残っているトラウマ的な経験がいくつかあります。これらの感情や記憶を処理するのが難しく、それが私の精神的健康を徐々に悪化させました。	そのようなトラウマを抱えると、心に深い傷を負うことがあります。それは、状況によっては精神的な健康に悪影響を及ぼす可能性があります。以下のアドバイスを参考にして、トラウマを処理することができるようにしてみてください。 1. トラウマについて話すことを始める トラウマについて話すことは、トラウマを軽減するための一つの方法です。トラウマに関する話をすることで、トラウマに対する理解が深まり、傷痛が軽減されることがあります。 2. 専門家に相談する トラウマに関する専門家に相談することも有効です。心療士やカウンセラーなど、専門家に相談することで、トラウマを処理する手助けをしてくれるかもしれません。 3. 自己啓発書などを読む トラウマに関する自己啓発書や情報を読むことで、トラウマに関する知識を身につけることができます。これにより、トラウマを処理するための方法を知ることができます。 4. 散歩や運動…
私はよく落ち込んで落ち込んで、人生の喜びやモチベーションを失い、将来に自信がなくなり、この感情がとても苦痛で無力感を感じさせます。	それはよくわかります。落ち込んでしまうことは、自分自身や周りの人たちを守るためには必要なものですが、もう少し適切な方法で行う必要があります。以下は、自分自身と向き合い、自分自身を再確認するためのいくつかのアイデアです。1. 自分自身を再確認する自分自身を再確認することは、正直に落ち込んでしまう原因の一つです。自分自身に自信を持って、自分自身の強みや弱みを認めることが大切です。自分自身に向き合い、自分自身の強みや興味、目標を明確にすることで、自分自身に自信を持つことができます。2. 自分自身を成長させる自分自身を成長させることで、自分自身に自信を持つことができます。自分自身に向き合い、自分自身を変えることで、自分自身を変えることができます。自分自身に向き合い、自分自身を成長させることで、自分自身に自信を持つことができます。3. 自分自身を磨く自分自身を磨くことは、自分自身に向き合い、自分自…
最近、子供たちが頻繁にかんしゃくを起こし、家の物を壊すことさえありますが、これはうつ病の症状である可能性があります。	そうですね。子供たちが頻繁にかんしゃくを起こし、家の物を壊すことがうつ病の症状である可能性があります。うつ病は、子供たちの行動や思考において、精神的な問題を引き起こす原因となる疾患であり、子供たちがうつ病に感染している場合、家族や周囲の人々にも影響を与えることがあります。また、うつ病によって、子供たちの学習や社交能力が低下する可能性もあるため、早めに対処することが重要です。
ストレスや不安を感じることが多く、小さなことでさえ落ち着かず緊張を感じることがあり、リラックスして人生を楽しむことが難しい	そうですね。ストレスや不安を感じることが多く、小さなことでさえ落ち着くことが難しいと感じることがある場合、まずは自分自身をリラックスさせることが大切です。心身をリラックスさせる方法として、お散歩や音楽を聴く、読書をする、ストレッチや筋トレをする、リラックスする時間を作るなどが挙げられます。また、ストレスや不安が原因であることを意識し、それを受け入れたり、対策を考えることも大切です。自分自身に対して優しく、自分自身を向き合い、自分自身を忘れずに受け入れることが重要です。
自分の体にとても不満があり、いつも太りすぎたり痩せすぎたりするように感じ、自分の体をどう受け入れてよいかわかりません。	体をどう受け入れてよいかわかりません。
自分のパフォーマンスや能力に自信がなく、いつも自分はうまくできないと感じていて、失敗や他人に笑われるのが怖いです。	そういった状況を理解しています。自信に紐は、自分自身がうまくできることを確信することで働きます。ですが、自信を持つことができない状況では、まずは自分自身の弱点を知ることが大切です。その上で、効果的な方法を試すことで自信をつけられることがあるでしょう。例えば、自分に合ったスキルを身につけることや、自分に合った環境で働くことなどが考えられます。また、自分のいずれに役立つスキルや能力を見つけることも大切です。自分自身を正直に見つめ、自分に自信を持つことができるようになるために、自分に合ったスキルを身につけることや、自分に合った環境で働くことなどが大切です。
私の気分は、パターンもなく、非常に高い状態から非常に低い状態まで激しく変動しました。	それはとても大変な気持ちですね。低血圧の症状は、精神的なストレスや睡眠不足、食事不足などによって引き起こされることがあります。低血圧には、頭痛や視痛、腕や脚からの圧痛、疲れ、などの症状があります。また、頭痛や視痛には、頭皮が赤くなることもあります。これらの症状がある場合は、必ず医師に相談してもらうことが大切です。
群衆の中にいると、いつも無視されているように感じたり、存在していないようにさえ感じられ、とても孤独で迷ってしまいます。	そのような感じたいだけではありません。集団で孤独感を抱える人は多いので、そのような感じたいだけではありません。集団で孤独感を抱える人は多いので、そのような感じたいだけではありません。集団で孤独感を抱える人は多いので、そのような感じたいだけではありません。集団で孤独感を抱える人は多いので、そのような感じたいだけではありません。集団で孤独感を抱える人は多いので、そのような感じたいだけではありません。集団で孤独感を抱える人は多いので、そのような感じたいだけではありません。集団で孤独感を抱える人は多いので、そのような感じたいだけではありません。集団で孤独感を抱える人は多いので、そのような感じたいだけではありません。集団で孤独感を抱える人は多いので、そのような感じたいだけではありません。集団で孤独感を抱える人は多いので、そのような感じたいだけではありません。集団で孤��
他人の承認や尊敬を得るには自分は十分ではないと感じることがよくあります	そのような感じたいだけではありません。他人の承認や尊敬を得るには自分自身が十分ではないと感じることは、自信の失敗や自己評価の低さ、孤独感、不安感、劣等感などの感情や心理的な問題につながることがあります。これらの問題がない場合は、そのような感じたいだけではありません。他人の承認や尊敬を得るには自分自身が十分ではないと感じることは、自信の失敗や自己評価の低さ、孤独感、不安感、劣等感などの感情や心理的な問題につながることがあります。これらの問題がない場合は、そのような感じたいだけではありません。他人の承認や尊敬を得るには自分自身が十分ではないと感じることは、自信の失敗や自己評価の低さ、孤独感、不安感、劣等感などの感情や心理的な問題につながることがあります。これらの問題がない場合は、そのような感じたいだけではありません。他人の承認や尊敬
将来について混乱して無力感を感じ、どの方向に進むべきか分からず、非常に不安で落ち着かない気分になります	将来についての不安や、どの方向に進むべきかの迷いは、よくある悩みの一つです。以下に、将来についての不安を解決するためのアイデアをいくつか紹介します。1. 具体的な目標を設定する：将来についての目標を設定することで、自分が何をするべきかを明確にし、進むべき方向性を見極めることができます。また、目標を達成するために必要なステップや努力を計画することで、将来についての不安を軽減することができます。2. 将来を一歩ずつ考える：将来についての不安を軽減するために、将来を一歩ずつ考えることが重要です。将来についての不安を解消するためには、将来についての考え方を変える必要があります。将来についての不安を軽減するためには、将来についての考え方を変える必要があります。将来についての考え方を変えることで、将来についての不安を軽減することができます。3. 将来に対するリスク管理を行う：将来に対するリスク管理を…
私は自分の行動や決断が他人から批判されたり不承認になったりするのではないかと常に心配しており、とても不安でイライラしていました。	それはよくある悩みの一つですね。自分の行動や決断が他人から批判されたり不承認になったりすることに不安を感じる人はたくさんいます。以下に、自分の行動や決断が他人から批判されたり不承認になったりすることを感じなくするためのアイデアをいくつか紹介します。1. 自分の意見を強くすること：自分の意見を強くすることで、自分の行動や決断が他人から批判されたり不承認になったりすることを感じなくすることができます。自分の意見を強くすることは、自己肯定感を高め、自分の行動や決断を厳密に評価し、正しい方向性を見極めることができます。2. 他人の意見を尊重すること：自分の行動や決断が他人から批判されたり不承認になったりすることは、他人の意見を尊重することができます。自分の行動や決断を他人の意見の上にすることは、自分の自尊心を低下させ、自分の行動や決断を犠牲にすることになります。3. 自分の行動や決断を正しく評価…
自殺したいけど勇気がない、ただ自分を隠して二度と出てこないようにしたいだけ	自殺を決意していることは、深刻な心理的な状況です。まずは、自分の心理的な状況を理解し、必要であれば専門家の支援を受けることをお勧めします。また、自殺を決意していることを改めて再評価し、自分自身を守るために必要な援助を受けることをお勧めします。自殺を決意していることを改めて再評価し、必要な援助を受けることで、自分自身を守り、健康的な生活を送ることができるかもしれません。
家族はいつも私を批判し、とても傷つきます。家族とどのようにコミュニケーションを取ればいいのかわかりません。家族は私にとってとても遠い存在です。	家族とのコミュニケーションにおいて、孤独感や批判に対する傷つきがある場合、以下のような方法で取り組むことができます。 1. コミュニケーションの環境を整える 家族との会話をする場所や時間を決めて、冷静に話し合いましょう。また、自分の気持ちや考えをオンプレイで伝えることも大切です。 2. 禁止の話題を避ける 家族とは警備の話題や不満の話題を避け、共通の趣味や話題に集中しましょう。 3. 聴き取りを通じたコミュニケーションを求める 家族との会話を通じて、相手の気持ちや考えを理解し、相手の意見を尊重することが大切です。また、相手が話してくれた内容について、考えを深め、理解を深めましょう。 4. 趣味や共通点を見つける 家族とのコミュニケーションをより良いものにするために、共通の趣味や共通点を見つけてみましょう。それによって、会話がより楽しくなると思われます。 5. 無言のコミュニケーションを楽…
私は以前、些細なことでイライラし、感情の落ち込みから立ち直るのが難しく、自分には価値がないと感じていました。	それは深刻な悩みですね。自分自身に価値を見失っているということは、決して平凡なことではないでしょう。そのような状況では、まずは自分自身に対して同情と優しく、自分を肯定することが大切です。自分自身を否定することは、イライラや感情の落ち込みにつながります。そして、自分自身に対して優しく接している状態で、自分のやりたいことや興味を見つけてみることも重要です。簡単なことから始めて、一歩ずつ挑戦していくことが大切です。
私は同僚からいじめを受けており、それが慢性的な自尊心の低下と拒絶への恐怖につながりました。	それはとてもつらい経験ですね。同僚からのいじめは、自分自身の価値を否定するための方法として働くことがあります。しかし、同僚からのいじめに対して、自分自身を否定するという思いは、あくまでも長期的に良いことではありません。そのような状況では、まずは自分自身に対して同情と優しく、自分を肯定することが大切です。自分自身を否定することは、イライラや感情の落ち込みにつながります。そして、自分自身に対して優しく接している状態で、自分のやりたいことや興味を見つけてみることも重要です。また、同僚からのいじめに対しては、自分自身を守るための方法を考え、それを実行することも必要です。具体的には、同僚からの意見を批判的に考え、自分自身の意見に基づいて行動することが重要です。
最近、いつも気分の変動が激しいと感じていて、楽しいときもあれば、理由もなく落ち込んでしまうときもあり、とても困っています。	気分の変動が激しいと感じるときは、それ自体が問題ではありません。人間は自己表現が多岐にわたり、気分が変化することは常にあります。ただ、気分が変わらない状態で、長期間生活しようとすると、ストレスがたまってしまうこともあります。そのような場合は、短期的に気分が変わることは良いことですが、長期的には気分のストレッサンスを抱えなければなりません。そのためには、自分自身と向き合い、気分を調整することが必要です。例えば、リラックスする時間を作ること、ストレスを減らすための瞑想や運動、自分に合ったストレスマネジメントの方法を見つけることも大切です。また、心理カウンセリングなどのサポートを受けることも助けになるかもしれません。
とてもストレスを感じていて、打ちのめされそうになり、慌てふためいたり、息苦しくなったりすることがよくありました。	ストレスを感じていると、自己肯定感が低下し、自分自身を否定するという心理的な問題が生じることがあります。そのような状況では、自己肯定感を高めることが大切です。自分自身を肯定することで、ストレスを軽減し、感情を落ち込むことができます。例えば、自分自身に優しく接することや、自分自身にとって達成したことを積極的に認めることが効果的です。また、自分自身に合ったストレスマネジメントの方法を見つけ、それを実践することも大切です。例えば、リラックスする時間を作ることや、ストレスを減らすための瞑想や運動などがあります。心理カウンセリングなどのサポートを受けることも助けになるかもしれません。
どこから来ているのか分からない不安や恐怖を感じることが多く、時には呼吸することさえ困難になります。	不安や恐怖を感じることが多い場合、以下のような対処法があります。1. 自分自身を肯定する。自分自身が何をしているのか分からないということは、不安や恐怖を感じる原因となることがあります。自分自身に対して肯定的に考え、自分自身が何をしているのか理解していると自信を持つことが大切です。2. 呼吸に集中する。呼吸に集中することで、心拍数を下げることができ、呼吸を困難にさせないようにすることができます。整帳を持って、心拍数を数えて、数字が上がったら、数字を記録していくとともに、数字が下がったら、数字を記録していくとしましょう。3. 瞑想をする。瞑想をすることで、心身をリラックスさせ、不安や恐怖を感じる原因を解消することができます。瞑想をする場合は、自分自身が何をしているのか理解し、自分自身と向き合い、自分自身を肯定することが大切です。4. ストレスを軽減する。ストレスを軽減することで、不安や恐怖を…
私はいつも自分には価値がないと感じていて、十分ではなく、十分に賢くなく、十分に美しくなくて、イライラしています	それはとてもつらいようですね。自分自身に価値を見失っているということは、抱えることが多いのではないでしょうか。しかし、自分自身を肯定し、自分自身を理解することは、自分自身に価値を見失わないようにするために重要です。自分自身が何をしているのか理解し、自分自身が何をしているのか理解していると自信を持つことが大切です。また、趣味や興味を見つけることで、自分自身に価値を見失わないように努力することもできます。
私はいつも自殺願望があり、人生は無意味で価値がないと感じています。私も絶望感を感じ、自分の将来に希望が持てないと感じています	それはとてもつらいようですね。自殺願望を感じ、人生が無意味であると感じているということは、抱えることが多いのではないでしょうか。しかし、自分自身を肯定し、自分自身について理解することは、自殺願望を感じなくするために重要です。自分自身が何をしているのか理解し、自分自身が何をしているのか理解していると自信を持つことが大切です。また、自分自身にとっての意義や価値を見つけることもできます。趣味や興味を見つけることで、自分自身について理解することができるかもしれません。また、自分自身に対して肯定的に思うことが大切です。自分自身が何をしているのか理解し、自分自身が何をしているのか理解していると自信を持つことが大切です。
自分の人生が無意味だとよく感じる、なぜ自分がこんなふうに生きているのかわからない、目的やモチベーションがない、時間を無駄にしているように感じる、自分には価値がないと感じる	だとよく感じる、なぜ自分がこんなふうに生きているのかわからない、目的やモチベーションがない、時間を無駄にしているように感じる、自分には価値がないと感じる
最近、仕事がたくさんあり、毎日たくさんのタスクに対処しなければならないため、非常にストレスを感じていますが、達成感がなく、非常にイライラしています。心理的プレッシャー？	あなたが感じているストレスは、一般的に心理的プレッシャーと呼ばれます。心理的プレッシャーは、自分自身や外部からの要求に対して、達成感がなく、負担が大きい状態を指します。このような状況に陥っていると、自己肯定感が低下し、自己評価が下がる感覚に苦しむことがあります。そのような状況を克服するためには、以下のことを考えることが大切です。1. 自分自身のストレスを測定する。ストレスを感じている理由を調べ、その原因を特定しましょう。その上に、具体的な行動に取り組むことができるようになるようにしましょう。2. 目標を設定する。目標を設定することで、自分自身が達成したいことを明確にし、それに向けて努力することができます。目標を設定したら、それに向けて具体的な行動に取り組むことができます。3. ストレスを軽減する。ストレスを軽減する方法としては、休憩を取ることや、運動をすること、思いものを書き出すこと、音…
私はよく不安や緊張を経験し、人生のストレスや課題に対処できないと感じます。	不安や緊張を感じることはよくあることですね。そのような状況では、まずは自己肯定感を高めることが大切です。自分自身に対して、自信を持って考え、自分自身がどのようなことをすればよいか考えることが大切です。また、自分自身に対して、コントロールできることを挙げ、それに基づいて行動を起こすことも重要です。例えば、自分自身がどのように対処できるか、何ができるか、どのようなことが大切であるかを把握することが大切です。また、適度な運動や食事、睡眠など、身体的な運動も大切です。これらの方法は、ストレスを軽減するための効果があります。
私の心は否定性と自信喪失でいっぱいで、そこから抜け出す方法がわかりません	否定性と自信を失っているということは、精神的な状態の一つであり、それが原因で心が苦しんでいることは理解できます。まずは、自分自身に対して、どのようなことがあなたにとって大切であるのか、自分自身がどのように望むのかを考えることが大切です。自分自身を見つめ直すことが、自信を持つための第一歩となるでしょう。また、自分自身に対して、肯定的な言葉を願ってみることも有効です。例えば、自分自身が何で何をしたいのか、自分自身が何の人生を過ごせたいのかを考え、それに応じた行動を起こしてみることが大切です。また、自分自身が何かを達成した瞬間に、自分自身がそれを達成したことを忘れずに、自分自身の成長を感じることが大切です。自分自身を受け入れ、自分自身を肯定的に捉えることが、自信を取り戻すための第一歩となるでしょう。
自分の感情がどんどん不安定になってきていると感じていて、落ち込んだり、また感情的になったりすることがあり、心に何か問題があるのかわかりません。	不安定な感情の状態が続いていると、身体的なストレスや精神的な負担がかかり、健康に悪影響を与える可能性があります。また、このような状態が続いてしまうと、自分自身の感情や行動が制限され、人間関係にも影響が出ることもあります。 そのため、まずは自分自身の感情を正しく把握することが大切です。例えば、感情的になったりすることがあった場合は、その原因を分析し、自分自身がどうしたのかを思い出しましょう。また、自分が感じた問題について、どのように解決するかを考えることも大切です。 その上で、落ち込んでしまったり、感情的になったりすることがあった場合は、医師やカウンセラーに相談することも必要です。専門家に相談することで、自分自身の状態について正しく把握し、治療を行うことができます。 また、健康的な生活習慣を身に着けることも大切です。食生活や運動、睡眠など、日常生活の中で健康的な習慣を続けることで、身体的な…
子供が学校から帰ってくると、家は冷たく、親の優しさを一向に受け入れてくれず、自分だけが失敗ばかりで、心は空っぽで、大きくなったら親のようになれるかが心配です。	このような気持ちはよくわかります。子供が学校から帰ってくると、家の冷さがあなたにとっては驚きと不安をもたらすことがあります。また、親の優しさを一直受け入れてくれないことがあると、自分自身が失敗したことを認めず、自分だけが大きくなっていないと感じることがあるかもしれません。しかし、大きくなるときは、親のようになることはありません。大きくなるときは、自分の人生を真摯に考えることが必要になります。そして、親の優しさを受け入れてくれないこと自体は、とても大切なものです。親はあなたを支えてくれていただけでなく、あなたが失敗したことを受け入れてくれています。それだけがあなたを成長させることができると思います。しかし、それでも悩みを感じている場合は、相手に相談することも大切です。親や友人、先生などに親しくお話しできれば、心の苦しみを軽減することができます。また、自分自身について考えることも大切です。自…
彼はほぼ毎晩眠れず、眠れず、眠りにつくことができず、気分はますます悪くなり、うつ病やその他のより深刻な心理的問題に陥るのではないかと心配しています。	毎晩眠れずに、眠りにつくことができず、気分が悪くなることは、うつ病や心理的問題のリスクを高めることがあります。そのような状況では、医師やカウンセラーに相談することが大切です。また、その状況を改善するためには、日常生活のルーティンを定めることが重要です。例えば、寝る前に適度な運動をしたり、睡眠の品質を向上させたりすることで、眠れる環境を整えることができます。また、呼吸をしっかりとしながら寝ることも大切です。さらに、ストレスを軽減することも大切です。ストレスを感じたときに、自分自身をマッチしたり、仕事や家庭などのリラックス効果のある姿勢を取ることができます。また、ゆっくりとした運動やリラックスする時間を作ることも有効です。最後に、心理的なサポートを求めることも大切です。カウンセラーや心理士の相談に相談することで、心の悩みを解決することができるかもしれません。
最近、いつも自分が弱いと感じていて、思考がぐちゃぐちゃの縄のように掴めなくなってしまいます。	自分が弱いと感じていることや思考がぐちゃぐちゃの縄のように掴めなくなってしまうことは、うつ病や深刻な心理的問題に陥ることがあります。そのような状況では、医師やカウンセラーに相談することが大切です。また、自分が弱いと感じていることに対して、自分自身に強い意志を持って取り組むことが大切です。自分自身を肯定し、自信を持って行動することで、自分が弱いと感じていることを克服することができます。また、自分が抱える問題を考え、それに対処する策を考えることも大切です。さらに、ストレスを軽減することも大切です。ストレスを感じたときに、自分自身をマッチしたり、仕事や家庭などのリラックス効果のある姿勢を取ることができます。また、ゆっくりとした運動やリラックスする時間を作ることも有効です。最後に、心理的なサポートを求めることも大切です。カウンセラーや心理士の相談に相談することで、心の悩みを解決することができるか…
自分の失敗を思い出すたびに無力感を感じる、社会に受け入れられないと思うと勇気を失う、自分の夢は実現できないかもしれないと思うと無力感を感じる	それらは、人間として自分自身を否定する思考パターンとなることがあります。しかし、それらの思考パターンは常に変わるでしょう。まずは自分自身を受け入れ、自分に自信を持つことが大切です。また、自分の夢を実現するためには、自分自身を克服し、新しい道を歩み続けることが必要です。失敗やクライアントに対しては、恐れずに常に前向きに取り組むことが重要です。
私の人間関係は常に不安定で、しばしば精神的苦痛を経験し、人間関係の問題にどう対処すればよいのか分からず、無力感や喪失感を感じます。	私はあなたの悩みを理解しています。人間関係の不安定さや精神的苦痛は、私たちが人間で繋がることによって生じることがあります。以下に、あなたが直面する問題に対処するためのアドバイスをいくつかご提案します。1. 自己認識の強化: 自分自身をより深く理解し、自分の強みや弱みを認めることが大切です。自己認識が高まることで、自分がどのような人物であるかを客観的に見ることができます。2. 精神的なサポート: 心理学者やカウンセラーと相談することで、問題を正確に把握し、適切なアプローチを見つけることができます。精神的な苦痛や不安定な状態がある場合は、専門家の助けを求めることが重要です。3. コミュニケーションスキルの向上: 相手の気持ちやニーズを理解し、適切なタイミングでコミュニケーションを行うことが大切です。誤解や不満を招く説明や、相手の意見を尊重することも重要です。4. ポジティブな思考を育てる: …
私は時々コントロールを失い、非常にイライラしてイライラし、周囲の人々に対して癇癪を起こすことさえあります。	それは、コントロールが失われることや、自分の感情を抑えつついることが難しいことを意味していますね。このような状況では、自分自身を受け止め、気持ちを肯定的に捉えることが重要です。以下に、その対処法をいくつかご提案します。1. 自己認識の向上: 自分自身の強みや弱みを認め、自分を客観的に見ることが大切です。自己認識が高まることで、自分がどのような人物であるかを正確に理解し、感情的にならずに対処できます。2. 自己コントロールの努力: 自分の感情を抑えつつ、理性的に状況を見極めることが重要です。冷静な状態でビジョンを持ち、計画を立てることで、コントロールを取り戻すことができます。3. ソフトな対応の習慣化: 周囲の人々とのコミュニケーションを、相手の気持ちに合わせてアプローチすることが大切です。自分自身がイライラしていると感じた場合は、相手の立場に立ってみることで、より適切な対応ができます。4…
私の仕事はストレスが多く、毎日問題や課題に対処しているため、とても不安になり、睡眠不足になり、食欲がなくなり、時には自分がコントロールできなくなったと感じます。	それは、ストレスが多くなり、うつ病のリスクが高まることがありますね。まずは、ストレスが原因であることを認識し、それを解決することが重要です。以下に、ストレス解消と改善のためのアドバイスをいくつかご提案します。1. ストレス解消の方法を見つける: ストレス解消のためには、自己ケアや運動、瞑想などが効果的です。自分に合った方法を見つけ、定期的に行い、ストレスを軽減することが大切です。2. 仕事の優先順位をつける: 仕事に集中しながら、自分のストレス解消に必要な時間を設けることが大切です。仕事とプライベートのバランスを取ることで、ストレスを軽減し、健康的な生活を送ることができます。3. ストレスを感じた場合は、早めの休息を取る: ストレスがたまったとき、早めの休息を取ることで、ストレスを軽減することができます。休息を取ることで、リフレッシュし、精神的な負荷を軽減することができます。4. 健康的…
私は常に感情を抑えることができず、突然怒り出すこともあれば、突然黙ってしまうこともあり、自分の行動や行動が予測できず、とても動揺して混乱します。	それは感情を認識し、それらを適切にコントロールすることができずにあります。感情をコントロールするためには、まず自分自身が感情を抑えるために必要な環境や方法を調べることが重要です。また、感情をコントロールするためのスキルを磨くことも必要です。例えば、深呼吸をすることでリラックスすることができます。また、緊張を感じたときには、音楽を聴くことやストレッチをすることでリラックスすることができます。
過去の不快な経験から抜け出すことができず、その出来事を思い出すたびに、耐え難い痛みと喪失感を感じます。	失敗や不快な経験から抜け出すことが難しいと感じる方法や心理的なアプローチについて説明します。まず、失敗や不快な経験を抜け出すことができずに感じると、厳しい自己評価や自己肯定感の低下を感じることがあります。そのため、自分自身に対して厳しくなりすぎることで自信を失い、挫折したり、失敗したりしてしまうことがあります。しかし、失敗や不快な経験を抜け出すことができずに感じると、その出来事を思い出すたびに耐え難い痛みと喪失感を感じることもあるかもしれません。その場合、その経験を思い出すことが大変に苦痛を引き起こすことがあります。しかし、失敗や不快な経験を抜け出しないことで、その経験を意識的に扱うことができます。まず、失敗や不快な経験を抜け出すことができないという事実を認めることが重要です。そして、その経験を意識的に扱うことで、自分自身に対する肯定�
私は孤独で無力感を感じることが多く、自分の内なる世界に相談できる人は誰もおらず、世界から見捨てられているように感じ、非常に苦痛で絶望的な気分になります。	孤独感や無力感に悩まされ、自分の内なる世界に相談できる人がないと感じているということは非常につらいことです。そのような状況に陥ったときには、まずは自分自身を冷静にすることが大切です。心の中に抱える感情や思考を客観的に見つめることで、状況に対する理性的な評価ができるようになります。また、自分自身にとって本当に大切なことがあるものを見つけることも重要です。それらが何であるかはあくまで自分自身によって異なりますが、自分自身にとって大切なことを見つけることで、自信を取り戻すことができます。さらに、孤独感や無力感に悩まされる人は、他人との交流を求めることができます。例えば、友人や家族などからのサポートを求めることができるかもしれません。また、自分自身が抱える問題を誰かに相談することもできます。相談を求めることで、自分自身を受け止めることができ、自分自身に対する理解や支援を得ることができます。以上の…
自分の欠点のせいで劣等感や無力感を感じることが多く、自分は十分ではなく、愛されるに値しないと感じる	自分自身の欠点や不満を自覚してしまうことが、自分自身に対してポジティブな劣等感や無力感を引き起こすことがあります。そのような状況に陥ったときには、まずは自分自身に対して、ポジティブな評価を持つことが大切です。自分自身が何をしているのか、どのような努力を惜つき、どのような成果を出してきたのかを客観的に見つめることで、自分自身を受け止めることができます。また、自分自身に対して欠点や不満を自覚してしまうと、それを自分自身に対して批判的に思考することも大変なことです。そのような思考によって、自分自身が十分ではないと感じ、自分自身が愛されないと感じることがあります。しかし、そのような思考によって、自分自身を不履で批判的に思考することで、自分自身に対する自信を失い、自分自身を受け止めることがつらいことです。そのような状況に陥ったときには、自分自身に対してポジティブな評価を持つことや、自分自身を受け止…
仕事や勉強のプレッシャーがたくさんあり、疲れ果てることがよくありますが、リラックスしてストレスを解消する方法がわかりません。	ストレスを解消するための方法は複数あります。例えば、適度な運動をすることで筋肉のトラブルを解消し、リラックスすることができます。また、音楽を聴くことや読書をすることでリラックスすることができます。また、昼寝や瞑想をすることでリラックスすることができます。また、自分に合ったリラックス方法を見つけることが大切です。
気分の変化がとても早くて、幸せから悲しみまでほんの少ししかかからないのですが、なぜですか?	気分の変化が早く、足元を感じるほど早く、幸せから悲しみまでほんの少ししかからないのですが、なぜですかということは、私たちが受ける感情の強さや持続時間に差があることによるものだと思われます。人は、感情を感じるために神経系を活性化し、それを調節するための機能を持っています。この機能は、感情の強さや持続時間によって制限されます。したがって、あなたが感じている気分の変化が早いことは、それが私たちが受ける感情の強さや持続時間によって制限されたものであることを示唆しています。また、あなたが感じている気分の変化がほんの少ししかからないことから、それが幸せから悲しみまでほんの少ししかからないことを意味していると言えます。これは、あなたが感じている感情が強いことを示唆していることを意味しています。したがって、あなたが感じている気分の変化が早く、足元を感じるほど早く、幸せから悲しみまでほんの少ししかからない…
私は他の人より忍耐力を失いがちで、小さなことをするときに不必要に落ち込んで限界まで追い込まれているように感じます	それはわかります。忍耐力を失いがちで、小さなことをするときに不必要に落ち込んで限界まで追い込まれるような感じ方があるとのことですね。そのような状況を避けるためには、自分自身の心理や体調を見直すことが大切です。まずは、自分自身がどのような状況で精神的な安定を保つことができるかを検討しましょう。その上で、自分自身がどのようなサポートを必要としているかを把握することも重要です。例えば、周りの人や専門家の助けを借りることや、自分自身が疲れていることを反映してストレスを解消する方法を試したりすることが効果的です。また、自分自身がどのような状況で精神的な安定を保つことができるかを検討することで、自分自身がどのようなサポートを必要としているかを把握することができます。自分自身がどのような状況で精神的な安定を保つことができるかを検討することで、自分自身がどのようなサポートを必要としているかを把握すること…
医者に行ったり、セラピストに診てもらったりすることを考えるたびに、怖れと不安を感じます。自分の問題が暴露され、他人に判断されるのではないかと心配します。この恐怖により、助けを求めることができなくなります。	それはわかります。医者に行ったり、セラピストに診てもらったりすることを考えるたびに、自分の問題が暴露され、他人に判断されるのではないかと心配することがあるとのことですね。そのような恐怖により、助けを求めることができなくなってしまうことがあるかもしれません。しかし、恐怖や不安があっても、医者やセラピストに行くことは必要な場合があります。自分の健康や心理的な状態を改善するためには、専門家に相談することが大切です。また、自分自身がどのような状況で健康や心理的な支援が必要であるかを把握することが重要です。自分自身がどのような状況で健康や心理的な支援が必要であるかを把握することで、自分自身が何を求めているのかを明確にすることができます。また、医者やセラピストに相談することで、専門家が自分自身の状況を正確に把握することができます。医者やセラピストが自分自身の状況を正確に把握することで、自分自身がどの…
職場で多くの挫折や不当な扱いに遭遇し、とてもイライラし、人生に絶望感を感じています。	それはとてもつらいですね。絶望感を感じることは、個人的な問題であることも理解しますが、それを克服するためには、まず自分自身を受け入れ、自分自身を励ましていくことが大切です。また、自分の夢や目標を明確にし、それに向かって前進することも重要です。また、周りの人たちにも理解を求め、サポートを求めることも大切です。
クラスメートから差別され、人生が無意味だと感じることがあります	クラスメートから差別され、人生が無意味だと感じることがあるとのことですね。そのような感情や思考を抑える方法がありますが、それは私には経験豊富な人たちが教えることができます。私が提供できる情報は、以下の通りです。1. 自分自身の差別感を認めること自分自身が差別感を抱いていることを認めることは、その感情をひどくするための第一歩です。差別感を認めることで、自分自身を客観的に見ることができ、それによって自己啓発のためのアプローチができます。2. 他人との交流を増やす他人との交流を増やすことで、自分自身がまだまだ人間であることを知ることができます。他人との交流を通じて、自分自身がどんな周りにいるのかを知ることができます。3. 自分自身がどんな価値を持つことを知る自分自身がどんな価値を持つことを知ることで、自分自身がどんな価値を持つことを知ることができます。自分自身がどんな価値を持つことを知ることで…
自分の体や外見に非常に不満があり、常に自分を過剰に批判したり否定したりしており、それが日常生活や社会活動にまで影響を及ぼしています。	そうですね、体や外見に不満を抱えているということは、自分自身に対して批判的な態度をとっていることが考えられます。そのような態度は、自己啓発に悪影響を及ぼす可能性があります。自分自身を批判的に扱うことは、自分自身に対して無条件に態度をとることになります。それは、自分自身が誤っていることを認めずに、自分自身を客観的に見ることができないということになります。その結果、自分自身をよく見ていることがなくなり、自己肯定感が低下することがあります。相反に、自分自身を客観的に見ることができるようになるためには、自分自身に対して優しく、客観的に扱うことが必要です。自分自身を客観的に見ることで、自分自身の課題を見つけ出すことができます。そして、その課題を解決するために努力することができます。また、自分自身を客観的に見ることができるようになることで、自己肯定感を高めることもできます。自分自身を客観的に見ること…
最近、だるさや脱力感を感じることが多く、階段を上るのも疲れるのですが、医者に診てもらったほうがよいでしょうか？	最近、だるさや脱力感を感じることが多く、階段を上るのが疲れることがある場合、医者に診てもらうことは必要な場合があります。しかし、その前に、まず自分自身の体調を整えることが大切です。まず、食生活を見直すことが大切です。健康的な食事を摂ることで、精力が豊かになります。また、適度な運動も必要です。適度な運動によって、筋肉を増やし、心肺機能を改善することができます。もし、自分自身の体調を整えることで疲れが解消されない場合は、医者に診てもらうことが必要です。医者に診てもらうことで、疲れやだるさの原因を特定し、適切な治療を受けることができます。ただし、まず自分自身の体調を整えることが大切です。健康的な生活習慣を取り入れることで、疲れやだるさの症状を改善することができます。
自分の感情や行動をコントロールできず、衝動的な決断をしてしまうことが多いように感じますが、これは精神的な病気でしょうか?治療方法は？	それは精神的な病気ではありません。それは人間としての感情や行動をコントロールすることが難しいことです。ただし、自分の感情や行動についてはコントロールできるようになるためには、自己理解を深め、自分自身を受け入れることが重要です。また、精神的なプロフェッショナルに相談することも有効です。精神的な病気にかかる場合は、専門の医療機関で治療を受けることが必要です。
心の底にあるネガティブな感情をすべて押し殺して、少しでも弱い自分を許さないで、でも自分を抑えることはできない	心の底にあるネガティブな感情をすべて押し殺しすることは、人間としての健康や自己肯定感を低下させ、精神的な問題を引き起こす可能性があります。そのため、自分自身を摂り込むことは避けるべきです。しかし、弱い自分を許さないということは、あなたが自分自身を受け入れ、自分自身を尊重することを意味します。自分自身に対して苦しみや不安を感じることは、あなたが人生において新しいことに挑戦するための一部であるかもしれません。しかし、自分自身を抑えることは、あなたが人生をより豊かにするために必要なことではありません。したがって、あなたは自分自身を受け入れ、弱いと感じることを受け入れることが重要です。あなたが気づいていることを自分に話し、次の目標に向けて前進することが大切です。自分自身を受け入れ、自分自身を尊重することは、あなたが人生をより充実したものにするための第一歩です。
私たちはいつも喧嘩して、そのたびに辛い言葉をかけられ、別れました。	喧嘩は、二人の関係を悪化する原因の一つです。では、あなたとあなたの前のパートナーとの関係を再開するために、いくつかの考え方を提案します。まずは、冷静になり、お互いの気持ちを語り合い、相手の意見を聞いてもらうことが大切です。お互いが対面で話し合うことで、お互いの考え方や感情を理解することができます。次に、コミュニケーションのスキルを磨くことも重要です。話し合いを行う際に、相手の言葉に注目し、相手の気持ちを理解することが大切です。また、自分自身の気持ちを正確に伝えることも大切です。最後に、関係を再開するためには、お互いに妥協点を見つけることも必要です。それは、相手の考え方や行動に対して、自分自身の考え方や行動に妥協することです。これらの考え方を実践することで、お互いの関係を改善し、再回復することができるかもしれません。
シャオ・チャンさんは、道を歩いているといつも周りの人に覗かれているような気がして、精神状態がどんどん不安定になっていきました。	周りの人からの覗かれや不安定な精神状態を感じることは、心の困りごとによって引き起こされることがあります。このような状況を克服するためには、以下のような対策が考えられます。まずは、自分の気持ちを正確に伝えることが大切です。周りの人に話すことで、自分自身の気持ちを理解し、自分自身を受け入れることができます。また、自分自身の感情を正しく把握することができるように、自己反省を行うことも重要です。次に、精神的な支援を求めることも大切です。専門家に相談することで、精神的な問題についてアドバイスを受けることができます。また、心理カウンセリングを受けることもあるかもしれません。さらに、日常生活の中で自分自身を徐々に信じるようになることも大切です。健康的な食生活や運動、仕事や趣味など、自分自身を徐々に支えることができる習慣を作ることが大切です。これらの対策を実践することで、シャオ・チャンさんの精神状態を改…
自分の対人関係に問題があると感じています。友人、家族、同僚との意思疎通や意思疎通が難しく、時には衝突や口論さえあり、とてもイライラし、無力感を感じています。健全な関係を築く方法	自分の対人関係に問題があると感じたときは、まずは自分自身の気持ちを整理することが大切です。そのためには、自分の気持ちを受け止め、冷静になり、どのような気持ちがあるのかを認識することが必要です。 次に、対人関係を改善するためには、相手の気持ちを理解することが重要です。相手がどのような気持ちを持っているのか、どのようなトラブルがあるのかを聞き、相手の意見や気持ちを理解することが大切です。また、自分自身が相手にどのような影響を与えているのか、自分が改善できる点があるのかを考えることも重要です。 対人関係を改善するためには、コミュニケーション能力が必要です。相手とのコミュニケーションをし、相手の気持ちを理解し、自分自身も自分の話をして、相手にどのような影響を与えているのかを考えましょう。また、相手の意見や気持ちに対して、考えや批判を抑え、相手を尊重することも大切です。 もし、自分自身が改善できな…
私は自分の見た目や体に不満を持っており、常に自己判断や自己疑念を抱いていたため、自信と自尊心が低くなってしまいました。	なるほど、自分の見た目や体に不満を持っていることは、自信と自尊心が低くなってしまう原因のひとつですね。自分に対する肯定的な態度を維持することは、自己肯定感を高めることができます。自信について、どのようなことが自信につながると思いますか？また、どのような行動をして自分に自信を持っているか聞いてください。
まるで誰も自分を理解してくれていないかのように孤独で無力感を感じることがよくあり、人々とつながることが難しく、それが悩みであり、解決策を見つけるのが困難です。	そうですね、孤独感や無力感が原因で心の乗り出しや悩みが起こることがありますね。また、人々とつながることが難しいと感じることで、自己肯定感が低くなり、自信を持って行動することができずに悩みがつきものになります。そのような状況を改善するためには、まず自分自身を理解し、自分について話し合うことが大切です。自分が抱える問題や悩みを無事に聞くことで、自分自身がどのような状況にあるのかを理解することができ、自己肯定感を高めることができます。また、自分自身が何を求めているのかを明確にすることも大切です。自分が望むことを明確にしておくことで、人々とのつながりや行動を取ることができるようになります。
両親が離婚して以来、私は祖母の家で暮らしており、母と二人で暮らしていますが、母は祖母よりも他人であると常々感じていて、どのようにコミュニケーションをとればよいのかわかりません。	親しい関係を築くためには、コミュニケーションが大切ですね。そのためには、どのようなのか対処するかを考えることが大切です。まずは、どのような気持ちを母さんが抱いているのかを理解することが重要です。母さんが祖母よりも他人であると感じているのであれば、それがどのような理由であるのかを聞くことが大切です。また、自分自身が母さんにどのような気持ちや考え方を持っているのかを明確にすることも大切です。自分自身がどのような恋愛や親としての期待を持っているのかを話し合うことで、母さんとのコミュニケーションを円滑にすることができます。また、母さんと一緒に過ごす時間を大切にすることも大切です。一緒に過ごす時間を楽しく過ごすことで、母さんとの関係性を深めることができます。
成功よりも失敗の方が多く、頑張れば報われると自分を慰めることが多くなりましたが、現実は失望することが多いです	失敗を恐れないことが、成功につながる要因の一つですね。失敗を恐れずに頑張ることで、自分自身を信じ、自分自身を客観的に見つめることができます。失敗から学ぶことで、自分自身がどのようなことが大切であるかを理解し、自己成長を促すことができます。また、失敗を恐れないことで、自分自身がどこに向かっているのかを正確に把握することができます。自分自身がどのようなことを追求しているのかを明確にすることで、自分自身の方向性を見出すことができます。失敗を恐れずに頑張ることで、自分自身を信じ、自己成長を促すことができます。
何かが起こるのではないかという強い恐怖感があり、落ち着くことができません	そのような恐怖感を抱える場合は、まずは冷静になり、自分自身を安全に抱えることが大切です。深呼吸や落ち着く状態をとることで、心身の安定を取り戻すことができます。また、自分自身を受け入れ、自分自身を忏難しないように思いを伝えることも大切です。自分の本当の本音を聞くことができるように、自分自身を受け入れ、自分自身を信じることが必要です。さらに、周囲を冷静に見てみることも大切です。ある事を恐れている場合でも、周囲には何かも問題がないかもしれません。周囲の人々や、仕事に関する情報を収集することで、もっと冷静になることができます。最後に、自分自身に対して謝罪することも大切です。自分自身を受け入れ、自分自身に対して謝罪することで、もっと自信を持つことができます。自分自身を信じることができるようになることが、恐怖感を抑えるための最も効果的な方法の1つです。
自分が何をしたいのか、何をすべきなのかが分からず、混乱した状態が続いていると感じており、それがとても悩み、時にはネガティブな感情を抱いてしまうこともあります。	そのような状況は、誰にでも起こり得ることです。自分が何をしたいのか、何をすべきなのかが分からないという状況は、心の不安や不満を感じることがあります。そこで、まずは自分自身の気持ちを冷静にし、自分が抱えている感情について話し合いをすることが大切です。また、自分自身が何をしたいのかを考えることも重要です。自分自身がどのようなことに興味を持ち、興味を持っていることが多いのか、それに基づいて行動することができます。自分自身が興味を持つことに集中し、それに向かって具体的な行動をとることで、目的を見つけることができるかもしれません。また、自分自身が抱えている感情について、自分自身に話して話し合いをすることも大切です。自分自身が感じている悩みや不安を自分自身で解決することができるようになることが、悩みを解消するための最も効果的な方法の1つです。ただし、私たちは人間であるため、時にはネガティブな感情を抱…
時々気分が落ち込んだり、ネガティブな感情から抜け出すのが難しいことがあります。どうすればメンタルを調整できますか?	気分が落ち込んだり、ネガティブな感情から抜け出すのが難しいという状況は、心の健康に悪影響を及ぼすことがあります。そのような状況を改善するために、以下のような方法があります。1. 自己管理の習慣を身につける。まずは自分自身の時間を円滑にし、ストレスを軽減するために、寝る時間や運動、食事などの生活習慣を改善しましょう。また、効率的に仕事や学業などの奮闘することで、ストレスを軽減することができます。2. 適度な運動をする。運動は、ストレスを軽減するために効果的です。運動によって、焦りや不安を軽減し、身体的なリラックス感を得ることができます。運動は、ウォーキング、サイクリング、ストレッチなど、自分の好みに合わせて選ぶことが大切です。3. 心理的なサポートを求める。心理的なサポートを求めることで、自分自身を安心させることができます。心理療法やカウンセリング、心理士などの専門家に相談することが効果的…
私は常に自分が十分ではない、十分に賢くない、十分に美しくないと感じており、他人に自分の欠点が見えないように自分を完璧にパッケージ化したいと思うことがよくあります	そのような感情は非常によくあるものですね。そのような気持ちは、自分自身を責めやすくすることがあるため、健全な関係を築くためには特に危険です。 まずは、自分自身をコンプレックスしないようにしましょう。自分自身を完璧にパッケージ化することは、常に自分に不安を与え、自分自身を責めにすることにつながります。自分自身を完璧にパッケージ化することは、健全な関係を築くための基礎ではありません。 相手に自分の欠点が見えないように自分をパッケージ化することは、対面帰りであっても劣ったことになるかもしれません。相手が自分を正しく理解することは、健全な関係を築くために必要です。そのためには、自分自身を正しく理解することが必要です。 まずは、自分自身を理解することから始めましょう。自分自身の欠点や不足
本当の帰属意識や目的意識が欠けていて、自分の中に空虚さを感じることがよくあります	それはよくあることですね。自分自身に目覚め、自分自身を探求することは、人生において非常に重要なことです。まずは、自分自身に対して冷静な態度を持つことから始めましょう。自分自身を批判することは避けてください。自分自身に対して優しく、愛情を持つことが大切です。自分自身を磨くために、自分自身に対する理解を深めることが必要です。また、自分自身の中にある空虚さを抱えることを認め、それを受け入れることが大切です。自分自身を肯定的に見つめることで、自分自身に対する善良な態度を育んでいきましょう。自分自身を大切にし、自分自身を愛することが、より健康的な生活を実現するための基盤となります。
誰かが私を攻撃したり褒めたりするたびに、私は尊敬に値しないので、彼らは私をだましているだけだといつも感じます	それはとても辛いことですね。私たちは、他人の意見や評価に対して常に強い抵抗反応を感じることがありますが、それは私たち自身の強い意志力を証明するものではなく、心理的な問題だと言えます。それを克服するためには、自分自身に対して優しく、愛情を持つことが必要です。また、他人の意見や評価に対して、受け止め、反応を控えることが大切です。私たちは、他人の言葉や行動によって、自分自身を責め、自分自身を軽蔑することになりますが、それは自分自身にとって本当に厳しいことではありません。他人の言葉や行動だけで自分自身を責めることは、自分自身に対する抵抗力を高めることになります。自分自身を大切にし、自分自身に対して優しく、愛情を持つことが、より健康的な生活を実現するための基盤となります。
他人から批判されたり否定されたりして、ますます自信がなくなってしまうのではないかと心配していますが、どうすれば自信を高めることができますか?	他人からの批判や否定によって自信が失われることは、非常につらいことですね。しかし、自分自身に対する自信を高めることは、まだもできます。まずは、自分自身に対して優しく、愛情を持つことが大切です。自分自身に対して厳しく批判することがあるかもしれませんが、それは自分自身にとって本当に厳しいことではありません。自分自身に対して優しく、自分自身を肯定的に見つめることが、自信を高めることに繋がります。また、自分自身の強いポイントを洗い出し、それを活かせることも大切です。自分自身にとって本当に重要なことを見つけ、それを実行することで、自信を高めることができます。また、自分自身を大切にし、自分自身に対して優しく、愛情を持つことも自信を高めるために大切です。自信を高めるためには、自分自身を愛することが必要です。
自分の感情にどう対処したらいいのかわかりません。ちょっとしたことで爆発してしまうことがよくあります。自分の感情をコントロールできないと感じます。これは私に精神的な問題があるということでしょうか？	自分の感情をコントロールできないと感じることは、精神的な問題がある可能性があります。自分の感情をコントロールすることはとても辛いことですが、彼らの感情をコントロールすることは、自分自身を保護することができます。 まずは、自分の感情を整理することが大切です。自分自身の感情を整理することで、自分自身がどのような気持ちを持っているのかを理解することができます。自分自身の感情を整理するためには、自分自身が感じている感情を受け止め、冷静になり、どのような気持ちがあるのかを認識することが必要です。 次に、自分自身が感じている感情を理解することが重要です。自分自身が感じている感情を理解することで、自分自身がどのような状況でいるのかを理解することができます。自分自身が感じている感情を理解することで、自分自身が何を求めているのかを理解することができます。 自分自身が感じている感情を理解することは、自分自身…
将来に対する不安と恐怖でいっぱいで、どっちに進んでいいのか分からず、毎日とても迷っています	将来的不安和恐惧是人类常常会感受到的情绪，尤其是当我们面临未知的未来时。以下是一些建议，可以帮助您在面对未来不确定性时保持冷静和理智。1. 认识到未来是不确定的：了解的是，我们无法预测未来的情况。因此，我们应该学会接受未知的事情，并尝试采取积极的措施来应对它们。2. 保持积极的态度：尝试抱持积极的态度，相信自己能够克服困难并应对挑战。积极的态度可以帮助您更好地应对未来的挑战。3. 制定明确的目标：制定清晰的目标可以帮助您更好地规划未来，并确保您在追求目标时保持专注。4. 培养自强：培养自强可以帮助您在面对困难时保持冷静和自信。可以通过冥想、运动、学习新技能等方式来培养自强。5. 寻求支持：与家人、朋友或专业人士交流可以帮助您分享您的担忧和顾虑，并获得建议和支持。6. 保持积极的生活方式：
私には昔から強迫性障害の症状があり、ドアや窓が閉まっているか、電化製品の電源が切れているかなどを何度も確認しなければならず、これらの要件が満たされないと、非常に不安になり、恐怖を感じます。日常生活や仕事に影響が出ています。この問題を解決する方法を知りたいです。	それは非常につらい状況ですね。以下は、その問題を解決する方法についての一般的なアドバイスです。1. 専門家の尋ね：昔から強迫性障害を抱えることを知ったら、専門家の尋ねをしてみることが重要です。専門家から正しい診断を受け、適切な治療を行うことができます。2. 確認習慣：確認習慣を改善することで、強迫性障害の症状を軽減することができます。窓やドアが閉まらないように注意し、電化製品の電源を切れていないようにしましょう。3. 睡眠待ち時間：睡眠待ち時間を増やすことで、身体的・精神的な状態を改善することができます。睡眠が十分な状態であることで、ストレスを軽減することができます。4. ストレス管理：ストレスが原因の一つであることはわかります。ストレスを軽減するためには、自分自身がやるべきことを明確にし、時間管理をしっかりとすることが大切です。5. 環境の変化：環境の変
時々退屈に感じたり、何をしたらいいのか分からなかったり、将来どうなるかも分からず、空虚に感じることがあります。	それは非常につらい状況ですね。以下は、その問題を解決する方法についての一般的なアドバイスです。1. 自己啓発：自己啓発において、自分自身の感情を正しく理解し、自分自身に対する理解を深めることが大切です。自己啓発の方法としては、書籍やオンライン講座などがあります。2. ストレス管理：ストレスが原因の一つであることはわかります。ストレスを軽減するためには、自分自身がやるべきことを明確にし、時間管理をしっかりとすることが大切です。また、運動や食生活の改善なども有効な方法の一つです。3. 心理療法：心理療法によって、ストレスや強迫性障害の症状を緩和することができます。心理療法には、カウンセリングや психотера
私はずっと赤ちゃんが欲しいと思っていましたが、妊娠中はいつも自分は良い母親になるにはふさわしくないと感じていました	妊娠中は自分自身が大切になり、健康的な生活を送ることが難しい場合があります。また、赤ちゃんの生まれ日を迎えることで、自分自身が必要とされることが増えます。そのため、日々の生活が厳しくなってしまうこともあります。 しかし、赤ちゃんが欲しいと思っていることは、大切なことです。自分自身が健康であることが、赤ちゃんの健康にも影響を与えます。さらに、妊娠中は、健康的な食生活や運動を行うことができる場合があります。自分自身を大切にすることで、赤ちゃんの健康にも寄与することができます。 ただし、妊娠中には、赤ちゃんが欲しいと思っていることに気づかない場合もあるかもしれません。そのような場合は、妊娠中の状態に合わせたサポートを受けることが大切です。医療機関や护士などに相談することができます。また、家族や友人など、信頼できる人々とのコミュニケーションをとることも大切です。そうすることで、妊娠中の状態を改善…
私は自分の体や健康について常に心配し、さまざまな病気にかかるのではないかと心配し、とても緊張して不安を感じていました。	あなたが自分の体や健康について心配し、病気にかかることに不安を感じていることは非常に傾向的です。このような心配や不安は、一般的には「心理的ストレス」と呼ばれます。このようなストレスは、体の健康にも悪影響を与えることがあります。心理的ストレスは、多くの原因で発生しますが、仕事や仕事とのバランス、人間関係、自分自身に対する期待などは、その中でも重要な要因の一つです。また、ストレスを感じることが多い人は、ストレス解消の方法を知り、実践することができない場合もあります。ストレスを解消するためには、まずは自分自身について理解し、そのストレスの原因を特定することが必要です。そして、そのストレスを解消するための方法を考え、実践することが大切です。例えば、ストレスを解消するための方法としては、ストレス解消の方法を知り、実践することが重要です。また、ストレスを軽減するためには、適度な運動、食生活の改善、睡…
私は非常に自意識過剰で、自分の外見や体型にうるさく、終わりのない自己修改や変化に巻き込まれることがよくあります。	自意識過剰による自己改善を求めることは、一般的には「自己改善欲」と呼ばれます。このような自己改善欲は、身体的にも健康的にも良いことですが、過剰になってからは、精神的なストレスや不安、自己責任感などの悪影響を与えることもあります。自己改善欲を抑えるためには、まずは自分自身について理解し、そのストレスの原因を特定することが必要です。そして、そのストレスを解消するための方法を考え、実践することが大切です。例えば、適度な運動、食生活の改善、睡眠の調整、思考の改善なども有効です。また、自己改善欲を抑えるためには、自分に合った目標を設定し、その達成に向けて小さなステップに挑戦することが大切です。自己改善欲を抑えることができるようになることで、自分にとっての理想的な体型や外見に対して、過剰にならない自己評価を持つことができます。また、精神的なストレスや不安、自己責任感などの悪影響を
学習障害はよくあることですが、ゲームのように扱うことで学習をより楽しくすることができます	学習障害を克服するために、ゲームやリアルなゲームのようなアプローチを取ることは、一般的には「アプリケーションプログラミング」と呼ばれます。アプリケーションプログラミングは、学習障害を克服するために、ゲームやリアルなゲームのようなアプローチを取ることができます。例えば、リアルなゲームによる教育やリアルなゲームのような試験法を用いた試験法、ゲームで学ぶ教育プログラムなどがあります。また、学習障害を克服するために、アプリケーションプログラミングによって、自分自身が学習する内容をよりアクセシブルにし、より楽しくすることができます。例えば、学習したい内容をゲームで表現し、それをゲームで使用することで学ぶことができます。アプリケーションプログラミングを活用して学習を楽しくすることは、学
頼れる人が欲しいのは当然ですが、どうやって頼ればいいのか分からず、挑戦するたびに失敗し、勇気を失ってまた原点に戻ってしまいます。	失敗は、学びにつながるものです。頼れる人が欲しいと感じることは、自分自身を信じることができることです。しかし、頼れることはもちろん、もう少し自分自身を信じることが大切です。自分自身が何をしたいのか、何を学びたいのかを明確にすることで、自分自身を信じることができるようになります。 また、失敗を恐れずに挑戦することも大切です。失敗を恐れずに挑戦することで、自分自身の成長につながります。しかし、頼れることはもちろん、もう少し自分自身を信じることが大切です。自分自身が何をしたいのか、何を学びたいのかを明確にすることで、自分自身の成長につながります。 諦めることは、まだまだ諦めることができるようになるための重要なステップです。失敗を恐れずに挑戦すること、あるいは余裕を持って、自分自身を信じることができるようになるための重要なステップです。自分自身が何をしたいのか、何を学びたいのかを明確にすることで…
物事に対する興味や熱意がどんどん低下し、何をするにもやる気がいつも低下しているように感じますが、これは精神的な健康上の問題でしょうか?	それはありがとうございます。精神的な健康の問題であることを認識していることは素晴らしいことです。精神的な健康は、体的な健康と密接に関係しています。精神的な健康を維持するためには、様々な要素が重要です。その中でも、興味や熱意を感じさせることが大切です。以下に、私が提案する精神的な健康の取り組みの一部をいくつか紹介します。1. 趣味や興味を見つける：趣味や興味を見つけることで、新しい発見や楽しみを楽しむことができます。趣味や興味を見つけるためには、自分がどのようなことに興味を持っているかを考え、自分好きなことを作るなどの方法があります。2. 日常的な運動を続ける：運動は、精神的な健康にも効果的です。運動によって、ストレスを解消し、脳を活発にすることができます。自分に合った運動（ジョギング、ウォーキング、サイクリングなど）を続けることが大切です。3. 食生活を良くする：適度な運動と健康的な食生…
定期的な心理的プレッシャーは、私たちの感情の安定に影響を与え、身体の健康に影響を与える可能性があります。私たちは心理的資質の育成に十分に取り組み、メンタルヘルス教育を実施する必要があります。	おっしゃる通りです。定期的な心理的プレッシャーは、私たちの感情の安定に影響を与え、身体の健康にも影響を与える可能性があります。そこで、心理的資質の育成に注力し、メンタルヘルス教育を実施することが重要です。私たちは、精神的な健康を支えるために、習慣化したいと思うべき行動や方法を見つけることが大切です。
一晩不法拘束され、衰弱するまで拷問されて、隅っこで一人泣いて、涙だけが闇を照らした	そういう経験はとても辛いですね。そのような状況で涙を流すことは、心身の痛みを軽減することができますが、それだけでは解決策がない場合もあります。そこで、一人で闇を照らすこともあるかもしれませんが、周りにいる人や、専門家に相談することも大切です。また、そのような状況で、自分の内面に向けて自己価値観やポジティブな思考を育てることも重要です。自分自身を肯定することができれば、より強く決心し、前向きな気持ちを育てることができます。
青少年の精神的健康の観点からは、健全な関係を築く方法と、自分の感情や要求を正しく表現する方法を学ぶことが非常に重要です。	おっしゃる通りです。青少年の精神的健康においては、健全な関係を築く方法と、自分の感情や要求を正しく表現する方法を学ぶことが非常に重要です。青少年は、成長期において、多くの課題に直面しているため、その時には、他人との関係を良好に築くことが必要です。また、自分自身の感情や要求を正しく表現することで、他人とのコミュニケーションを円滑にすることができます。そのためには、コミュニケーションスキルを身につけることが大切です。また、青少年が抱える問題や悩みを理解し、サポートすることも大切です。
最近悪夢をよく見るのですが、その夢を見ると恐怖や不安を感じ、睡眠の質や日常生活に影響が出ることもあります。	悪夢をよく見ると恐怖や不安を感じることは一般的です。これは悪夢が現実に近いような形で現れることによるものです。悪夢に対して、以下のような対策が考えられます。1. 悪夢を抑制するまずは悪夢を抑制することが重要です。悪夢を抑制するためには、以下のような方法があります。* 悪夢を抱える時間を減らす* ストレスを軽減する* 趣味や運動などのリラックス法を実践する2. 悪夢を払拭する悪夢を払拭するためには、以下のような方法があります。* 自分自身の思考を抑える* 目標を設定する* 自分自身を磨く3. 責任を持つ悪夢に対して責任を持つことで、自分自身が悪夢を抱える理由や原因を見つけることができます。これによって、自分自身が悪夢を抱える原因を解決することができます。4. 専門家に相談する悪夢に対して、専門家に相談することも重要です。専門家に相談することで、悪夢に対する正しい�
いつも不安で、物事の進み具合を常に心配しており、特に小さなことで不安や不快感を感じることもあります	不安や不快感を感じることは、あまりも多くの人にとって現実に近いことですが、長期的には健康に悪影響を及ぼす可能性があります。以下のような対策が考えられます。1. 睡眠を充実させる睡眠不足は、不安や不快感を感じる原因の一つです。睡眠不足を解消するためには、以下のような方法があります。* 十分な睡眠を取り入れる* 睡眠の習慣を見直す* ストレスを軽減する2. 運動をする運動は、ストレスを軽減し、心身をリラックスさせることができます。また、運動によって、スルー
ネガティブな考えを止めることができず、物事がそれほど悪くないときでも、依然として最悪のことを考えてしまい、とても落ち込んで無力感を感じ、この感情を決して取り除くことができないように感じます。	ネガティブな考えを止めることができず、物事がそれほど悪くないときでも最悪のことを考えてしまうことは、不安や不快感を感じる原因の一つです。以下のような対策が考えられます。1. 成功例を見る自分自身がネガティブな考えに囚われることがある場合は、成功例を見ることで、自分自身がネガティブな考えを改善することができます。例えば、自分自身がネガティブな考えに囚われた経験がある人の成功例を読むことで、自分自身がネガティブな考えを改善することができます。2. モチベーションを高めるネガティブな考えに囚われる原因の一つは、モチベーションが低いことです。モチベーションを高めるためには、以下のような方法があります。* 目標を設定する* 達成した経験を振り返
自分の人生は退屈で、情熱やモチベーションが欠けていると感じ、落ち込んで迷ってしまいます。	心配なことはありません。私たちは人生は変わりますが、自分自身の価値観や目標を見つけることは可能です。まずは自分自身に話を調べることから始めましょう。自分がどのような人生をしたいと思うのか、何がきっかけで私を動かすのか、自分がどのような価値観を持っているのかを考えてみてください。そして、その価値観や目標に合わせた行動をとることで、自分自身を変えていくことができます。
私はよく不眠症に悩まされ、夜ベッドに横になって仕事や家事、人間関係のことを考えているため、日中は集中できず、仕事の効率も悪く、気分も非常に悪くなります。	不眠症に悩まされながら日中を効率的に活動できるようにするためには、以下の方法が役立つかもしれません。1. 適度なアクティビティを取り入れる：毎日短いアクティビティを取り入れることで、眠気にならずに体を動かし、気分も上がります。例えば、ウォーキングやヨガ、ストレッチなどが挙げられます。2. 食事を改善する：適度な運動と食事のバランスを取ることで、疲労と不眠症の原因となる過剰なリドックが抑制されます。食事には、バランスの良い食材を含むものを選び、適量を摂取するように心がけましょう。3. 適切な睡眠をとる：夜遅く朝起きていると、ストレスと不眠症の原因となるホルモンのバランスが悪くなるため、適切な睡眠をとることが重要です。寝る前には、スマートフォンやパソコンなどの電子機器を適切に使用せず、リラックスする時間を作ることが大切です。4. 心理的なストレスを減らす：ストレスが原因である場合、適切な方法…
挫折や失望に遭遇したとき、安全になる唯一の方法はすべてを忘れることだと思います。	それは正しいアドバイスです。失望や挫折を受けた際には、落ち込んでしまうことがあるが、それをすべて忘れることはできません。傷を覚えておくことが重要です。それを振り返り、自分自身と向き合い、次に何をするかを考えることが大切です。失望や挫折を恐れずに、前に進むことができるようにすることができます。
肉体労働をしていないときでも、しばしば疲労感や脱力感を感じ、不眠症や不眠症に悩まされることも多く、非常に不快で不安な気分になります。	そうですね。肉体労働をしないときでも、疲労感や脱力感が感じられることがあるから、ストレスや不安が原因で不眠症や不眠症になることもあります。このような状況に陥った場合は、以下のような方法が役立つかもしれません。1. 適度な運動を取る：適度な運動を取ることで、体を動かし、疲労感を解消します。ウォーキングやヨガ、ストレッチなどが挙げられます。2. ストレスを軽減する：ストレスを軽減するためには、趣味や読書、ビジュアル観察などが効果的です。また、ストレスを軽減するためには、呼吸法や瞑想などのマインドフルネスな方法も効果的です。3. 良い睡眠をとる：睡眠時間を延ばすことで、リラックスした状態で眠ります。適切な睡眠をとることで、脱力感や不眠症の原因となるホルモンのバランスを整えることができます。4. スマートフォンやパソコンなどの電子機器を適切に使う：電子機器を適切に使用することで、ス
時々うつ病を患い、普通に食べることができなくなり、痩せていくのを人に見られるのが怖くて食べる量をコントロールするようになります	食べる量をコントロールすることは、あなたの健康を守るために重要なことの一つです。食べることが控えられない場合は、食事制限を導入することも考えられます。ただし、それは個人差がありますので、自分に合った方法を見つけることが大切です。また、食べることが控えられない場合は、食事制限を導入することができます。ただし、それは個人差がありますので、自分に合った方法を見つけることが大切です。
両親はいつも私を批判しており、何をやっても不十分で、とても落ち込んで失望し、両親の承認や賞賛は決して得られないと感じています。	そのような状況を遭遇すると、大切なのは自分自身を守ることです。両親の批判や不十分な表現を受け入れず、自分の本当の価値を見つけ、自信を持って前進することが大切です。自分にとって本当に大切なことや目標を見つけ、それに向かって努力することで、自分自身の成長と幸福を実感することができるかもしれません。また、適切な人とのコミュニケーションを取り、自分の感情や思考に寄り添い、サポートを受けることも大切です。
私の関係は常に非常に不安定で、常に感情に支配されており、健全な関係を維持することができません。	そのような関係は、健康的な関係を維持することができない状況です。まずは、自分自身がどのような感情を抱いているのか、どのような思考パターンを持っているのかを整理してみることが大切です。その上で、相手についての理解を深め、コミュニケーションを取ることが重要です。また、相手との距離をつけたり、時間を適切に使ったりすることも有効です。ただし、問題が解決しない場合は、専門家の協助を求めることも検討してみることが大切です。
シャオリンさんは大学時代にいじめに遭い、それが原因で劣等感を抱き、落ち込んでいました。どうすれば彼女が自信と精神的健康を取り戻すことができるでしょうか?	劣等感が原因でシャオリンさんが落ち込んだということですね。そのような状況から取り戻すことは難しいかもしれませんが、シャオリンさんが抱える感情や状況を理解し、効果的なサポートを提供することが重要です。まずは、シャオリンさんが抱える問題を専門家に相談し、専門家のアドバイスを受けることが大切です。また、シャオリンさんに対して、劣等感を持っていると思われる状況がなく、自分の能力や価値を認めることが重要です。彼女に対して、正しい情報や正しい捉え方を提供し、彼女が自分自身を信じるように支えてもらえるようにしましょう。
私の家族関係は複雑で、ストレスや不安を感じることが多く、どのように対処すればよいのか、誰に助けを求めればよいのかわかりませんでした。	家族関係に関するストレスや不安を感じるということは、多くの人にとって一時的な問題であるかもしれません。しかし、長期的には健康的な影響を及ぼす可能性があります。まずは、自分自身の気持ちを整理し、どのような状況で感じているのかを把握しましょう。その上で、問題を分析して、それに対処するための具体的なアプローチを考えてみることが重要です。また、他の家族メンバーとのコミュニケーションを円滑にすることも大切です。家族メンバー全員が理解し合い、問題解決に向けて取り組むことで、より効果的な対処が可能になります。
いつもネガティブな愚痴を言い、何に対しても前向きな姿勢をとらない友人がいます。彼のネガティブな性格が私の感情に影響を与えていると思いますが、彼とどのようにコミュニケーションをとればよいのかわかりません。	ネガティブな愚痛を持つ友人とのコミュニケーションについて、いくつかのアドバイスをお伝えします。1. コミュニケーションの場として、相手の立場に立って考えることが大切です。彼がネガティブな愚痛を示す傾向がある場合、相手の感情や状況に対しては前向きな姿勢をとることが難しくなることがあります。相手の立場に立って、彼が持つ感情や状況について理解しながら相手とコミュニケーションを進めることが大切です。2. 相手のネガティブな愚痛を批判しすぎることは避けてください。相手がネガティブな愚痛を持つ場合、その行動や感情に対して批判的なアプローチをとることが、相手にトラブルやストレスを感じさせることになります。相手の感情や状況について理解しながら、彼が持つ感情や行動について対処するようにスクラムで考えることが大切です。3. 相手が持つ感情や状況について理解した上で、彼に対して具体的なアドバイスや提案をするこ…
最近、常に不眠症で、寝ても悪夢を見て、起きた後も体が重いことに気づきました。どうすればよいですか?	不眠症や悪夢を起こすことがある場合、以下のような対処法があります。1. 睡眠の質を改善することが大切です。適切な睡眠時間をとるようにすることや、睡眠時にリラックスすることで、睡眠質を改善することができます。2. 不眠症や悪夢の原因を特定し、それに対処することも大切です。不眠症の原因がストレスや不安などの心理的問題である場合、それらに対処することが大切です。また、不眠症の原因が健康問題である場合は、早期の医療処置を受けることが必要です。3. 睡眠中の夢の様子を記録することも有効です。不眠症や悪夢を起こす原因が既に分析されている場合や、睡眠中の夢を記録することで、睡眠環境や健康状態についての理解を深めることができます。4. 適度な運動やストレッチを行うことも有効です。適度な運動やストレッチを行うことで、睡眠中の夢を改善することができます。以上のよ
友達とおしゃべりしていると、いつも会話が終わってしまって何も言うことがないと感じることがあります	会話が終わってしまうことが原因で感じる場合、以下のアドバイスが役立つかもしれません。1. コミュニケーションのプロセスを改善することが大切です。会話が終わってしまう原因を特定し、それに対処することが必要です。例えば、チャットの際に続きやりを望む時間を確保し、適切なトピックを取り入れることができるか確認することが大切です。2. 相手の気持ちや状況に理解することが大切です。相手が会話を終わらせた場合、その理由や背景を理解することが重要です。相手が気持ちの衝動で話をしない場合や、自分の気持ちが抜群である場合など、相手の状況を理解することで、より賢く会話を進めることができます。3. コミュニケーションのリスクを低減することが大切です。会話が終わってしまう原因が、自分自身が責任である場合は、そのリスクを低減するための対策を講じることが必要です。例えば、相手の意見を尊重し、質問を意識することで、より…
私の子供は学校でいじめられていますが、今はとても引きこもり気味で、どうやって彼を助けたらいいのかわかりません。	子供の学業が難しいと感じることは孫子たちが通じていることです。まずは、彼が何を困っているのかを知ることから始めましょう。彼が説明したうえで、自分が彼を助ける方法を考えてみることが大切です。また、彼が他の教師や同僚に対して教えた経験を聞くこともできます。彼が学ぶことができる内容や、彼が求めることがあるかを知ることで、彼を助けるためのアイデアを得ることができるかもしれません。
人とコミュニケーションを取るときはいつもとても緊張して、何を言えばいいのか分からず、間違ったことを言ってしまうのではないかと心配になります。	それはよくわかります。緊張して話す場合や、話したいことが分からなかった場合、または間違ったことを言ってしまうことは、非常に犯罪者になることがあります。このような状況では、まずは冷静になり、自分が言うことが正しいのか、誤って言うことができるのかを検討することが大切です。その後、自分が正しいことを伝えたいと思うのか、もう少し話してから考えてから言うことをすると良いでしょう。また、相手の反応を感じて、自分が言ったことを誤っていた場合は、訂正することが必要です。このように、冷静に気をつけ、相手とのコミュニケーションを取り、正しいことを伝えるようにしましょう。
一人でいるといつも説明のつかない恐怖を感じ始め、無意識のうちに目に見えない力に支配され、閉じ込められ、突き抜けられない殻に閉じ込められているように感じ、時にはすべてがひどく恐ろしいことになることがあります。	それは深刻な恐怖と孤独感を感じることですね。そのような状況は深刻な精神的な問題だと思います。このような状況に直面した場合は、まずは専門家に相談しましょう。医師や心理士、カウンセラーなどの専門家が、あなたの感情や状況について正確に評価し、適切なアドバイスを提供することができます。また、自分が抱える恐怖や孤独感について自分で解決するためにも、自己受容や自己肯定感の向上、適度なエンパシーの習慣化などが有効です。最も重要なのは、自分自身を信じ、自分の感情を認め、それを受け入れることです。
私はいつも自分に厳しすぎて、愛され大切にされる価値がないと感じていました。	それはとても深刻な感情ですね。自分に厳しいと感じているのは、あなた自身を厳しく評価し、自己改善に向けて努力しようとすることだと思われます。しかし、愛され大切にされる価値を感じられないということは、心の内の悩みや不安にも関係しており、深刻な精神的な問題の根底にあると思われます。このような状況に直面した場合は、まずは自分自身の心理状態を見つけ、精神的な支援を求めることが必要です。心理士やカウンセラーなどの専門家が、あなたの感情や状況について正確に評価し、適切なアドバイスを提供することができます。また、自己受容や自己肯定感の向上、適度なエンパシーの習慣化などが有効です。最も重要なのは、自分自身を信じ、自分の感情を認め、それを受け入れることです。
私の人生はいつもイライラばかりで、何をやっても失敗し、自分には価値がないと感じています	それはとてもつらい感情ですね。失敗を繰り返すことは、人生においてはやや一層ずつもってもあることですが、そのような状況に直面した場合は、まずは自分自身の心理状態を見つけ、精神的な支援を求めることが必要です。心理士やカウンセラーなどの専門家が、あなたの感情や状況について正確に評価し、適切なアドバイスを提供することができます。また、自己受容や自己肯定感の向上、適度なエンパシーの習慣化などが有効です。最も重要なのは、自分自身を信じ、自分の感情を認め、それを受け入れることです。失敗を繰り返すこと自体があなた自身を成長させることができるものです。失敗を恐れず、新しいエピソードを楽しみながら、自分自身の成長を応援しましょう。
私はいつもいじめられ、見下され、無力で無能だと感じられ、社会的状況で自分の本当の強さや能力を発揮できず、いつも隅っこに隠れていました。	それはとてもつらい経験ですね。自分の本当の強さや能力を発揮できずにいつもいじめられることは、自信を失い、前向きな気持ちになりにくくなります。しかし、これはあなたにとって難しい状況ですが、改善するために最適な手段を見つけることができます。以下は、そのためのいくつかのアイデアです。1. 専門家の支援を受ける: 自分の問題について正確に分析し、専門家のアドバイスを受けることで、自分に適したアプローチを見つけることができます。2. 睡眠問題を解決する: 睡眠不足は、ストレスや焦りを悪化させる原因の1つです。十分な睡眠を取ることで、ストレスを軽減し、自信を取り戻すことができます。3. 適度な運動を行う: 運動は、ストレスを軽減し、肌肉の筋強化につながることがわかっています。適度な運動を行うことで、自信を取り戻し、前向きな気持ちになりにくくなります。4. 自己肯定感を高める: 自分に対して肯定的な関…
将来について混乱して無力感を感じ、何をすべきか分からず、何をしたいのかも分かりません。	将来について混乱して無力感を感じたということはとてもつらい経験ですね。将来についての不安や混乱を感じることは、自分自身や人生の方向性について考えることができない状況です。しかし、将来についての不安を解決するためには、まずは自分自身の気持ちを正確に把握することが大切です。以下は、将来についての不安や混乱を解決するためのいくつかのアイデアです。1. 将来についての不安を考える: 将来についての不安を明確にするために、自分がどのような将来を想像しているのかを考えます。将来についての不安を明確にすることで、自分自身にとってどのような方向性が正しいのかを見つけることができます。2. 将来についての目標を設定する: 将来についての目標を設定することで、自分自身の人生に対する意思を明確にすることができます。将来についての目標を設定することで、自分自身がどのような将来を望んでいるのかを明確にすることがで…
なぜ私はいつも考えすぎて将来のことを心配し、外出するたびにドアの鍵を閉め、窓を閉めているかを再確認しなければならずのかわからなくて、とても疲れてイライラする。	それはとてもつらい経験ですね。自分自身が常に考えすぎ、将来についての不安を感じていることは、自分自身にとってとても負担しい状況です。また、外出するたびにドアの鍵を閉め、窓を閉めていることは、自分自身の環境を拡大しないことにつながるかもしれません。自分自身がどのような方向性を望んでいるのかを明確にすることが大切です。また、自分自身が常に疲れている状態を改善するためには、適度な休息やストレス解消のためのアプローチを検討することが必要です。例えば、運動や趣味を取り入れることで、ストレスを軽減し、自分自身の精神状態を改善することができます。自分自身がどのような方向性を望んでいるのかを明確にするためには、自分自身にとって自分自身がやりたいことを考えることが必要です。自分自身がやりたいことを考えることで、自分自身がどのような人生を送りたいのかを見つけることができます。自分自身がやりたいことを明確にす…
長い間性的暴行を受けてきましたが、今でも痛みや苦しみを感じています。この過去の傷にどう対処すればよいでしょうか?	私は対処法についての専門家ではありませんが、心理療法を受けることが重要です。自分自身がどのような行動を取ることができるかを考えることができるようになることが、自分自身を守るために重要です。また、自分自身の感情を表現できる場所を探し、自分自身を安心して話すことも大切です。自分自身を守るためには、自分自身を理解することが必要です。心理療法を受けたり、カウンセリングを受けたりすることで、自分自身を理解することができます。ただし、これらのことをすることができる場合は、心理療法やカウンセリングを受けるために自分自身が抱える障害や課題を解決することが必要です。
私は自分の人生に意味や目的がないと感じ、本当にやりたいことが見つからず、その喪失感がとても辛かったです。	それは本当に深刻な感じ方ですね。意味や目的が見つからずに自分の人生を送ることは、非常につらいことです。しかし、それでも諦めることはいいですか。自分自身を責めしながら、新しい経験や人との出会いを試してみることをお勧めします。また、自分自身を肯定することも大切です。自分自身が何をしたいのかを見つけることができれば、それに向かって進んでいくことができるでしょう。
ある日、私は現実世界から逃れる方法を見つけました。それはソファに頭を置き、耳を塞ぎ、外の音を聞かず、自分だけの世界に完全に浸ることです。この世ではあらゆる悩みが消える。	それは、痛みや不安に悩まされる人にとって、素晴らしい側面があるかもしれません。しかし、実際には現実の世界から逃れることは不可能です。それは、人間を受け入れることや交流することで自分の人生が充実することができる環境を提供しています。また、ソファに頭を置くことで自分だけの世界に完全に浸ることができるという想像は、心の離脱を試みていると感じられます。しかし、それは、心の健康に悪影響を与える可能性があるため、軽めに考えるようにしましょう。
しばしば孤独で無力感を感じ、誰からも理解されず、サポートもされていないと感じ、周りに人がいる場合でも、孤立感や疎外感を感じ、この感情が私を非常に落ち込んで否定的にさせ、時には不安やうつ症状につながることもあります。	それは非常に深刻な感じ方ですね。孤独感や無力感が私を非常に落ち込んで非定常的にさせることは、本当につらいことです。しかし、それでも諦めることはいいですか。自分自身を肯定することも大切です。自分自身が何をしたいのかを見つけることができれば、それに向かって進んでいくことができるでしょう。また、周りの人々に助けを求めることも重要です。自分が抱える感情や状況について、周りの人々に話してみることができれば、自分自身を理解し、支えになることもあります。
あなたからの一言で私は落ち込んでしまうかもしれません	私たちは、人間であり、同じような感情や状況に直面することがあるから、自分自身の感情や状況について話すことができます。しかし、その場合でも、自分自身を否定的に考えることは、本当に効果的ではありません。自分自身を肯定することができれば、より強い人格と自己肯定感を持つことができます。それによって、より健康的な人生を送ることができるでしょう。
自分の見た目や体型に非常に不満があり、自尊心の低下や不安を感じることがよくあります	自分の見た目や体型に不満があると感じることは、従来よりも多くの人にとっても多い傾向にあります。このような気持ちを解消するためには、自分自身を磨くことが大切です。以下に、自分自身を磨くための方法をいくつか紹介します。1. 自分に自信を持つこと自分自身に自信を持つことが大切です。自分が何をしたいのか、何を達成したいのかを明確にすることで、自分自身に自信を持つことができます。また、自分に合った運動や食事をして、健康的な体を育てることも大切です。2. 外見についても受け止める外見についても受け止めることが大切です。自分自身が大切に思っていることを、自分自身が見た目に反映させることができます。自分に合った服を着用する、髪型や髪型に対する自信を持つことも大切です。3. 自分を受け入れること自分自身を受け入れることも大切です。自分自身を批判することは、自分を悪くすることにつながります。自分を受け入れる…
本当に何をしているのか分からない、何をするにも見当がつかず、イライラする	イライラするという状況は、自分自身にとって大きな問題です。まずは、自分の気持ちや状況を整理することから始めてみましょう。自分自身が何をしているのか、何をするにも見当がつかないという状況は、自分が目標を持っていることを思い浮かべない状況です。そのような状況では、自分自身を見つめ直すことが大切です。自分が何をしているのか、何をするにも見当がつかないという状況は、自分自身が目標を持っていることを思い浮かべない状況です。そのような状況では、自分自身を見つめ直すことが大切です。自分が何をしているのか、何をするにも見当がつかないという状況では、自分自身が目標を持っていることを思い浮かべない状況です。そのような状況では、自分自身を見つめ直すことが大切です。また、自分自身にとっての分析や、自分自身を見つめ直すためのアドバイスを受けることも大切です。自分自身が何をしているのか、何をするにも見当がつかないと…
私は極度の対人恐怖症を持っており、見知らぬ人とコミュニケーションをとる勇気がなく、混雑した場所に現れるのが好きではありません。これらの恐怖症を克服できることを願っています	極度の対人恐怖症を持っているということは、非常に大変なことですね。ですが、恐怖症を克服することは可能です。まずは、自分自身が恐怖症を経験していることを受け入れ、自分自身を受け入れることが大切です。自分自身が恐怖症を経験していることを受け入れることで、自分自身が恐怖症を克服することができます。また、自分自身の将来を見据えて、自分自身を受け入れることも大切です。自分自身が恐怖症を克服するためには、自分自身に合った方法を見つけることが大切です。例えば、自分自身が喜ぶことや興味を持っていることを見つけることで、自分自身を振り返り、自分自身にとって自分自身が喜ぶことや興味を持っていることを見つけることができます。また、自分自身が喜ぶことや興味を持っていることを見つけることで、自分自身が恐怖症を克服するために必要な環境を見つけることができます。自分自身が喜ぶことや興味を持っていることを見つけることで…
心理学者は、極度のうつ病は人の身体的および精神的健康に影響を与える可能性があると考えています	あなたが私たちが極度のうつ病に患っていると思う理由は、私たちが自分自身を守ることができないことによるものである可能性があります。私たちが患っているうつ病は、精神的な問題になっているかもしれません。そのため、確かに身体的および精神的健康に影響を与える可能性があります。また、うつ病によって、自分自身が抱える問題を克服することができないため、精神的な問題が深刻化することがあります。そのため、極度のうつ病を抱えている人は、身体的な問題にも悩まされることがあります。
目標を追い始めると無力感を感じ、何かを変えようとすると勇気が出ないと感じる	無力感や勇気不足に悩まされる場合、以下のようなアドバイスが役立つかもしれません。1. 目標を明確にする無力感や勇気不足に対しては、まずは目標を明確にすることが大切です。自分が達成したいことを明確に把握し、その目標に向けてどのように進めたいかを考えましょう。具体的なアクションプランを立てることで、目標に向けて進む道筋が明確になり、無力感や勇気不足から解放されることがあります。2. 一歩ずつ進む目標に向けて一歩ずつ進むことが大切です。初めは小さなステップで進み、その後には徐々にバランスを取ることができるようになります。無力感や勇気不足に悩まされている場合は、小さなステップに集中し、自分自身の力を信じて進めていくことが大切です。3. 成功体験を積む目標を達成するためには、一度の成功体験を積み重ねることが大切です。自分自身が達成したいことを実践することで、自信を持つことができるようになります。ま…
今行っている仕事ができなくなるのではないかという不安から、不眠症や仕事に集中することが困難になることがよくあります。	不安や不眠症による集中力の低下は、実際には多くの人にとって印象的な問題です。以下のアドバイスが役立つかもしれません。1. 睡眠を促す：睡眠時間を十分に保つことが大切です。十分な睡眠は、集中力や記憶力を向上させることができます。一つのアプローチとしては、睡眠前にリラックスする時間を設けてください。また、睡眠前にリラックスした時間を設けることで、睡眠中にストレスを解消することができます。2. 趣味を取り入れる：日々の仕事や生活に忙しくなっている場合、自分にとって趣味があることが多く、一つのアプローチとして取り組むことができます。趣味を取り入れることで、精神的なリフレッシュを受けることができますし、集中力を向上させることができます。3. 運動をする：運動は、集中力を向上させることができます。ただし、過度の運動は、負担を増やすことがあるため、適度な運動量を目指すことが大切です。また、睡眠時間を増…
家族が私の助けを拒否すると、これまで以上に苦痛を感じます	家族との関係において、お互いに助けをすることは確かに大切ですが、時には拒否されることもあります。そのような場合、以下のアプローチが役立つかもしれません。1. 自分自身の感情を理解する：自分自身がどのような感情を抱いているのかを理解することが大切です。自分自身がどのような強い感情を持っているのかを理解することで、自分自身の感情を落とすことができます。2. 他の方への尋ねを検討する：家族との関係において、他の方を尋ねることも大切です。例えば、友人、カウンセラー、心理士などからアドバイスを受けることができます。他の方の意見を聞くことで、自分自身の考え方を変えることができるかもしれません。3. 時間を取っていることを改める：家族との関係において、時間を取ることは非常に重要です。自分自身の時間を確保することで、自分自身のストレスを軽減することができます。また、自分自身を優先することで、家族との関係…
困難に遭遇するたびに憂鬱になる	困難に遭遇するたびに憂鬱になると、自分自身の感情に対して著しい応答が生じることがあります。そのような時は、自分自身についての理解を深めることができます。また、憂鬱を感じた場合は、適切なサポートを求めることも重要です。友人や家族、専門家などに相談し、心のケアを受けることが大切です。
私はよく落ち込んで無力感を感じ、自分の人生には意味や価値がないと感じ、自殺を考えることもありますが、自分が弱い人間で失敗者だと思われるのではないかと心配して、誰にも言えません。	そのような気持ちはとてもつらいですね。自殺を考えることは、人生を終わらせる勇気があったものの、それが無罪な行為ではありません。まずは、何が原因で自分が落ち込んでいるのでしょうか？悩みや問題を解決するために、自分自身を受け入れ、問題解決策を探すことが大切です。また、自分が弱い人間であると感じるのではなく、自分自身の価値を見出し、自信を持って生きることができるようになることが重要です。自殺を決意する前に、あらかじめ自分自身に話を聞いてみることをお勧めします。
私の友人には、自分は十分に優れていないし、十分に頭がよくなく、十分に才能もないし、関心される価値さえないといつも感じているので、彼の精神的健康が心配になっています。	そうですね、友人の心理的健康に関心を持つことは素晴らしいですね。友人の心理的健康について、何か具体的な問題点があると感じたことがあれば、それについて話し合うことが大切です。また、友人に対して、自分自身も努力してよくても優れていないと感じているということは、自分自身を否定することではなく、自分自身を受け入れることが重要です。友人に対して、自分自身の優れたことをアピールすることは、自分自身を満足させることができるでしょう。ただし、友人の心理的健康については、専門家の助けが必要な場合があるかもしれません。カウンセリングを受けることも一つの選択肢として考えられます。
仕事のプレッシャーや家族とのいざこざのせいで、落ち込んで絶望感を感じることがよくありますが、どうすればこの感情を和らげ、精神的健康を維持できるでしょうか?	落ち込んで絶望感を感じることは、様々な理由があると思われますが、それ以外には、ストレスや不安、孤独感、不安定な状況なども関与する可能性があります。まずは、自分の精神的健康を維持するために、自分が行う行動を見直すことが大切です。例えば、仕事のプレッシャーや家族とのいざこなどに対して、自分がどのようにして対処するかを明確にすることで、自分自身に対して自信を持って行動することができます。また、精神的な安心感を得るために、適度な運動や食事、睡眠なども大切です。また、ストレスや不安を感じる場合は、自分自身に対して気持ちを語り、周囲の人々に対しても、気持ちを自然な形で伝えることが大切です。また、カウンセリングや心理療法などを利用することも考えられます。最も重要なのは、自分自身を受け入れ、心の停止しを避けることです。
最近、心が曇ってきて、自分のメンタルヘルスが心配になり、怖くなってきました。	心が曇ってきて、自分のメンタルヘルスに悩んだということは、よくわかりますね。怖く感じたということも念頭に置いていますね。心構えの悪化が原因で、アンキリティブな状態に入ってしまうこともあるかもしれません。最初は自分自身を見つめ直すことが大切です。自分自身の気持ちについて、どのような状況が気になっているのかを言えることができるか？自分自身に話を聞くことで、自分自身の気持ちを理解することができます。また、自分自身が怖く感じた場合は、気持ちを受け入れることが大切です。自分自身を受け入れることで、怖く感じることを減らすことができます。また、心構えの悪化を防ぐためには、適度な運動や食事、睡眠などが効果的です。また、心理療法やカウンセリングなどを利用することも考えられます。最も重要なのは、自分自身を受け入れ、気持ちを受け入れることです。
他人と向き合う勇気がない、いつも自分が十分ではないと感じている、緊張している、友達に話しかけられても、相手が何を考えているのか気になってしまう	そのような感じ方には、以下のようなストレス解消法が役立つかもしれません。1. 自分の感情を正しく表現できることができる場所を見つける自分が感じている感情を正しく表現できることができる場所を見つけることが大切です。例えば、書き込み、映画、スポーツ、音楽、踊りなどがおすすめです。感情を整理することで、ストレスを解消することができます。2. 気分を落とす自分の気分を落とすことも大切です。例えば、趣味をしたり、ストレッチをしたり、お肥やお茶を飲みたりすることで、気分を落とすことができます。3. 趣味を見つける自分に合う趣味を見つけることも大切です。自分が楽しめることが分かれば、ストレスを少し減らすことができます。4. 人と話すことが疲れている場合は、少しずつ始める人と話すことが疲れている場合は、少しずつ始めることが大切です。まずは、親や近い友人と話すことから始めることが良いでしょう。5. 集団で…
自分の精神的健康を維持できず、家族を失望させてしまうのではないかと心配です	自分の精神的健康を維持することは非常に重要です。家族を失望させることは決して望ましいことではありません。以下のような方法を試してみることができます。1. 自分の時間を大切にすること自分の時間を大切にし、自分の気持ちを整理することが大切です。自分だけの時間を作り、自分の気持ちを整理することで、ストレスを解消することができます。2. 趣味を見つけること自分に合う趣味を見つけることをおすすめします。趣味を見つけることで、ストレスを解消することができます。3. 運動をすること運動は、ストレスを軽減するために効果的な方法です。運動は、自分の体にも良い影響を与えます。4. 食事を整えること健康的な食事を摂ることが大切です。適度な運動をすることで、体に必要な栄養素を摂取することができます。5. 心理的な支援を求めること心理的な支援を求めることも大切です。心理士やカウンセラーなど、専門家に相談することで…
多くの人に囲まれていても、孤独で無力感を感じることが多く、自分の内心を誰も理解してくれないと感じる	そうですね。囲まれているときには、自分自身を誰かに相談することができないということもありますよね。また、孤独感や無力感を感じることも多く、自分の内心を誰かに理解してくれないと感じることもあります。以下は、そのような状況での対処法の一つです。1. 自分自身を認めること自分自身を認めることが大切です。自分自身を認めることで、自分自身を理解することができます。また、自分自身を認めることで、自分自身を信じることができます。自分自身を信じることによって、自分自身を大切にすることができます。2. 相手に相談すること自分自身を誰かに相談することも大切です。相手に自分自身を話すことで、自分自身を理解することができます。また、相手からのサポートを得ることで、自分自身を大切にすることができます。3. 心理的な支援を求めること心理的な支援を求めることも大切です。心理士やカウンセラーなど、専門家に相談することで…
将来についてとても混乱しています、何をしたらよいかわかりません、この混乱により非常に不安で不安な気持ちになります	将来についての不安や混乱は、多くの人にとってはよくあるものです。そのような時は、自分自身がどのように感じているかを理解することが重要です。自分自身に対して優しく接し、自分自身を受け止めることが大切です。また、将来についての不安を解消するためには、自分自身にとって目標を設定し、それに向かって努力することが有効です。具体的には、将来についての不安を感じる分から始め、自分自身の目標を明確にすることから始めましょう。自分自身がやりたいことを見つけ、それに向かって努力することで、将来についての不安が解消されることもあります。
今日パーティーに行ったんですけど、みんなに笑われて拒絶されて本当に倒れそうになりました	それはすごくつらいですね。笑われて拒絶されたということは、自分自身の意見を他人に対して否定することを意味しています。自分自身がそのような行動を認めることは大変です。しかし、あなたがそのような行動をしてしまったことで、他人に対して不確実関係を招くこともあるため、まずは自分自身の感情を理解し、自分自身がどのような行動をしてしまったのかを考えることが大切です。そして、その後、自分自身に話し合い、自分自身を肯定することが必要です。
私にとって人間関係が難しく、人と深いつながりを築くのがいつも難しいと感じています。人との付き合い方やコミュニケーションの取り方が分からず、すぐに孤立してしまうようでした。本当の友達が欲しいと思っていますが、作り方がわかりません。	それはとてもつらいことですね。人との付き合い方やコミュニケーションの取り方は、人との関係に大きな影響を与えます。しかし、それらは練習できるものであり、逆に練習することで自信がつきます。まずは自分自身が冷静になり、他人との関係を整理してみることが大切です。また、同じ趣味や関心事を持つ人たちと交流することも有効です。そして、自分が大切だと思うことを話し合い、自分自身に対して誠実になることも大切です。それによって、自然と付き合う人たちとの出会いが起こるかもしれません。
仕事のプレッシャーが大きく、毎日残業が多く、夜更かしも多く、心身ともに限界を感じているのに、まだやめられません。故障。	それはとてもつらい状況ですね。仕事のプレッシャーは、自分自身のストレスにも大きくなります。しかし、それが強いことをやめられないということは、心身の健康にも悪影響を与えます。まずは自分自身が冷静になり、自分がやるべきことだけを考えてみることが大切です。また、仕事と外面には、自分自身の時間を考え、自己投資をすることも大切です。その中には、運動や旅行、読書、音楽など、自分自身が好きなことを取り入れることが効果的です。自分自身が健康であることができるように、自分自身を見つめ直すことが必要です。
自分の感情をコントロールできず、ちょっとしたことでイライラしてしまい、周りの人を不快にさせてしまうことがあります。	それはとてもつらい状況ですね。自分自身の感情をコントロールすることはとても難しいことです。しかし、それはまだやめられないことです。まずは自分自身が冷静になり、自分が感じている感情について考えてみることが大切です。そして、自分自身が感じている感情を表現することも大切です。周りの人に不快にさせることは、自分自身にとっても苦しいことです。自分自身を理解し、自分自身を理解することが必要です。また、自分自身が話したいことや、自分自身がやりたいことを決め、最初から自分自身がやるべきことだけを取り入れることが大切です。自分自身が感じている感情をコントロールすることは大変ですが、自分自身にとって本当に大切なことです。
家族には愛も温かい言葉も本当の安心感もなく、責める言葉やプレッシャーばかりがかかっていたので、私はより内向的になり、誰とも関わりたくなくなりました。	そうですね。家族との関係は、誰もを変える力があります。孤独を感じた状況では、内向的になることがあるかもしれませんが、また、自分の孤独を受け入れることも大切です。自分にとって本当に快適な状況であり、周りの人々との関係も改善されることがあります。あなたが今迷っている状況では、自分自身を徐々に理解し、成長することが大切です。
将来が不安、成功するかどうか、夢を実現できるかわからない	将来の不安は孤独感としてもよくわかります。成功するかどうかや夢を実現できるかは、自分自身の努力や能力によって異なります。しかし、将来の不安に対しては、今までの経験や成功体験を踏まえ、自分自身がどのように行動しているかを思い出し、自信を持って進めることが必要です。また、将来の不安を解消するためには、将来の夢や目標を明確にすることも重要です。自分自身がどのようなことが必要だと感じるかを明確にすることで、将来の不安を解消することができるかもしれません。
人生におけるストレスや課題に対処できないと感じ、気分の落ち込み、不安、不眠症に悩まされることがよくありました。	そうですね。ストレスや課題に対処できないという状況は、抱えることが大きな負担となり、気分の落ち込みや不安、不眠症を引き起こすことがあります。このような状況に対処するためには、まずは自分自身の状況を正しく把握し、それを出して相手に伝えることが大切です。また、ストレスや課題を解決するために、自分自身をその中で引き出し、積極的に行動することが必要です。例えば、自分自身の時間を管理することで、ストレスを軽減することができるかもしれません。また、悩みを整理することで、自分自身がどのようなことをしているかを正しく理解することができるかもしれません。自分自身を徐々に理解し、成長することが大切です。
孤独を感じていて、周りにはたくさんの人がいるのに、いつも彼らと真につながることができるとは感じません。これは人間関係障害ですか?	孤独を感じているとともに、周りにはたくさんの人がいる場合は、人間関係障害にもなります。人間関係障害とは、人々が対話やコミュニケーションを行うことができないため、情報を共有しない、情報を閲覧しない、情報を受け取りない、コミュニケーションを避けるなど、障害を引き起こすことがある状態です。人間関係障害は、人々とのつながりができないため、人々が心のケアをすることができず、精神的な健康問題を引き起こすことがあるため、重要な問題です。人間関係障害を克服するためには、まずは自分自身がどのような状況でしょうかを正しく把握し、それを出して相手に伝えることが大切です。また、自分自身が対話やコミュニケーションを取り入れることで、自分自身と周りの人々とのつながりを深めることができるかもしれません。自分自身を徐々に理解し、成長することが大切です。
将来がとても不安で、どうしたらいいのかわからない、未来がどうなるかわからない	将来不安は、人々にとってよくある悩みの一つであり、適切な対処法を探すことが重要です。以下の方法を試してみてください。1. 気をつける：将来の不安を感じるときは、自分についてどんなことがストレスになっているのか、それを気にしてみましょう。自分がどんな状況にあるのか、どのように感じているのかを反省し、自分自身を理解することが大切です。2. 目標を設定する：将来の不安に対して、自分自身が達成したい目標を設定することが有効です。目標を設定することで、将来の不安を予測することができ、それを乗り越える方法を見つけることができます。3. ストレスを軽減する：将来の不安がストレスになっている場合は、その原因を特定し、それを軽減する方法を試してみましょう。例えば、ストレスを感じる原因を減らすためには、運動や食生活の改善、睡眠の改善などが効果的です。4. 自分の感情を調整する：将来の不安を感じるときは、自分…
人間関係で多くの問題を抱えていて、落ち込んで無力感を感じており、何をしたらよいかわかりません	人間関係の問題があるということは、非常につらいことですね。それでも、何か具体的な方法を提案することができますので、いくつか考えることができますか？まずは自分自身を落ち込んでいるか、それが原因であるのか、また、問題が何であるのかを再認識してみることが大切です。
とても疲れて、肉体的にも精神的にも衰弱し、自分の人生には意味がないのではないかと時々自殺願望さえ抱くことがあります。	疲れと衰えているということは、非常につらいことですね。それでも、自分の人生には意味がないと感じているときは、まずは自分自身が何をして、何を達成したいと思うのかを再認識してみることが大切です。また、自分自身の感情を調整することも重要です。自分自身が感情的に衰えていると、肉体的な健康にも影響を与えることがありますので、それを改善することが必要です。また、意見を聞くことや、新しいことに挑戦することも、新しい出路を見つけるために有効です。自分自身が何をして、何を達成したいと思うのかを明確にすることで、その方向性に向かっていくことができます。
突然極度の恐怖やパニックに陥り、感情や行動をコントロールすることが難しくなり、その状態が長期間続くことがあります。	突然恐怖やパニックに陥り、感情や行動をコントロールすることが難しいときは、まずは自分自身がどんな状況にあるのかを理解し、それを反省することが大切です。自分自身がどんな状況にあるのかを理解することで、どのように感情や行動をコントロールするかを見つけることができます。また、心理療法やカウンセリングを受けることも有効です。心理療法やカウンセリングを受けることで、自分自身の感情や行動について深く理解することができ、その状態を改善する方法を見つけることができます。また、自分自身がどのような状況にあるのかを反省し、それを継続的に改善することも大切です。自分自身がどのような状況に陥りるのかを予測し、適切な対策を講じることが重要です。
新しい課題に直面するたびに、とても緊張して不安になり、自分には対処できないと感じてしまう	緊張や不安がある時、自己肯定感を高めることが大切です。以下の方法を試してみてください。1. 落ち着いてリラックスする：緊張を感じたら、深呼吸をして自分をリラックスさせましょう。リラックスすることで、不安感を軽減し、緊張を和らげることができます。2. 自分の能力を信じる：自分自身が何をしたいのか、どのような能力を持っているのかを確認しましょう。自分の能力を信じることで、緊張感を軽減し、自信を持つことができます。3. 目標を設定する：自分が達成したいことを明確にすることで、自分自身がどうしたらよいかを考えることができます。目標を設定することで、自分自身が何をしているのかを理解し、自己肯定感を高めることができます。4. 自分に対するポジティブな言葉をつくる：自分自身に対して、ポジティブな言葉をつくることで、自己肯定感を高めることができます。例えば、「自分は本当に素晴らしい人だ」という言葉など、…
突然、趣味がなくなった、何にも興味がなくなった、方向性やモチベーションを失ったように感じることがあります。	そうですね。そのような状況では、自分自身に対して感謝の気持ちを持ち、自分の立場について考えることが大切です。以下の方法を試してみてください。1. 自分にとって本当に大切なことを見つける：自分自身にとって本当に大切なことを見つけることができると、自分自身に対して感謝の気持ちを持つことができます。自分自身が大切にすることを感じることで、モチベーションを取り戻すことができます。2. 趣味に戻る：自分が興味を持つことがある趣味に戻り、自分自身にとって楽しいことをすることができます。自分自身が興味を持つことを感じることで、方向性を取り戻すことができます。3. 目標を設定する：自分自身がどうしたら喜んでいられるような目標を設定し、その目標に向けて取り組むことができます。目標を設定することで、自分自身が何をしているのかを理解し、モチベーションを取り戻すことができます。4. 自分に対するポジティブな言葉…
時々、抑えられない感情が胸にこみあげてきて、うつ病になったらどうしようかと考えてしまいます。	うつ病が起こった場合、医師や専門家の助けを求めることが大切です。また、自分自身が抑えられない感情が胸にこみあげてきた場合でも、自分自身がどうしても感情が強くなるのではなく、自分自身が気づくと自分自身が感じることが大切です。以下の方法を試してみてください。1. 感情を抑える：自分自身が感情を抑えることができると、うつ病を抑えることができます。深呼吸や呼吸法などのリラックス法を試してみることが大切です。2. 適切な休息を取る：うつ病によって体の休息状態が低下するため、適切な休息を取ることが大切です。眠りやリラックス時間を取ることで、感情を抑えることができます。3. ストレスを軽減する：ストレスを軽減することで、うつ病を抑えることができます。運動や音楽など、自分が好きなことをすることで、ストレスを軽減することができます。4. 自己改善を行う：自己改善をして、自分自身が気づくと自分自身が感じるこ…
私はいつも自分の体に非常に不快感を感じており、さまざまな奇妙な症状がありますが、医師からは健康であると言われ、非常に不安で無力感を感じています。	私も同じようなことがあります。自分自身の健康について不安を感じることは、あまり人間のことです。症状がある場合は、専門家に相談することが必要です。ただし、医師から健康であると言われても、医師が知る限りのことだと思います。自分自身の体の状態を触れることで、自分自身が何を感じているのかを理解することができるかもしれません。そして、その状態を改善するために必要な対処法を見つけることができるかもしれません。自分自身が健康であることを信じて、自分自身を受け止めることが大切です。
黄暁明さんは、緊張した環境に長時間いたため、不眠症に悩まされることが多く、朝と夜の区別がつかなくなり、生活リズムが完全に崩れてしまいます。	そんな状況では、患者さんには不眠症の治療が必要とされます。不眠症は、睡眠の継続や質が低下することで、身体や脳の健康に悪影響を及ぼす病気です。治療法としては、睡眠の改善を目的とした薬物療法や、睡眠の質を改善するための生活習慣の改善、ストレスの軽減を図るための心理療法などがあります。治療法を受けることで、患者さんの睡眠の質が向上し、生活リズムも戻しやすくなります。ただし、不眠症の治療は、医師の診断と治療の方法を受けることが必要です。
友達との関係は決して良好ではなく、本当の友達を作るのが難しいと感じており、とても孤独に感じています	友達との関係が良好でないということは、孤独感につながることがあります。しかし、友達を作ることは難しいと感じたときは、まず自分自身を見つめ直すことが大切です。自分自身を好きなことや趣味を見つけることで、自分自身の性格や好きなことを理解することができます。また、自分自身を磨くことで、自信がつきます。そして、友達を作るためには、友達を持つ人たちを知ることが大切です。周囲の人たちと出会い、交流を深めることで、共通の趣味や価値観を共有することができます。また、自分自身を分かりやすくするために、自分自身に自信を持て、周囲に自分自身を磨くことも大切です。最後に、自分自身を大切にすることが大切です。孤独感に悩まされることなく、自分自身を大切にし、友達を作ることができるように、自己啓発を行うことが大切です。
周りの人は私が緊張しすぎて小さなことを気にしているといつも思っています。どうすればリラックスできますか?	緊張しすぎていると、小さなことも気にしてしまうことがありますね。リラックスするためには、以下のような方法があります。1. 深呼吸をする。深呼吸をすることで、身体がリラックスし、緊張を和らげることができます。2. 肌触りをする。肌触りをすることで、身体に疲れを与え、リラックス効果が期待できます。3. 音楽を聴く。音楽を聴くことで、心を落ち着かせ、リラックスしてくれます。4. ストレッチする。ストレッチすることで、肌の疲れを和らげ、筋肉を鍛えることができます。5. 運動する。運動することで、筋肉を鍛え、緊張を和らげることができます。これらの方法を試して、自分に合った方法を見つけることが大切です。また、心身のリラックスにも役立つのは、日常生活において自分に合った時間を作ることです。自分に合った時間を作ることで、リラックスしていくことができます。
不眠症のため毎晩精神科医の診察を受けなければなりません	不眠症のために毎晩精神科医の診察を受けることは、あまり医療現場でよくあることです。不眠症は、睡眠の欠如が原因で発症する病気であり、症状が悪化することがあります。そのため、患者が症状を改善するために、毎晩精神科医の診察を受けることが必要になる場合があります。ただし、医師からの診断や治療を受けることが必要である場合、それを受けるためには診療の時間を設ける必要があります。また、診療を受けることができない場合は、再比較を行い、別の医療機関を探すことも必要になる場合があります。
家族や社会からのプレッシャーに対抗できず、多くのことを達成できないと感じている	家族や社会からのプレッシャーに対抗することは非常に難しい状況ですね。そういったプレッシャーに対して、自分自身を受け入れ、自分の行動に対して責任を持つことが大切です。自分が望むことや目標に向かって取り組むことができるよう、自分自身を信じることが重要です。また、周りの人たちに対しても、自分が望むことや目標を伝えることで、理解してもらうことができるかもしれません。自分自身が自信を持って、自分の気持ちを伝えることが大切です。
人間関係が悪化しているように感じられ、家族も友人も私を信頼してくれず、サポートしてくれなくなり、とても途方に暮れ、絶望的な気分になります。	そのような状況はとてもつらいですね。私たちは人間関係を築くために、時に誤った相手に対して行動することもあるかもしれません。しかし、そのような状況に陥った場合でも、自分自身に対して優しく、自分の気持ちを認め、自分を信じることが大切です。また、周りの人たちに対しても、自分が望むことや目標を伝えることで、理解してもらうことができるかもしれません。自分自身が自信を持って、自分の気持ちを伝えることが大切です。
私は自分の感情や行動をコントロールできなくなり、衝動的または暴力的に行動してしまうことがよくあります。	そのような状況はとても辛いですね。自分の感情や行動をコントロールすることは、個人には難しいこともあります。しかし、そのような状況に陥った場合でも、自分自身に対して優しく、自分の気持ちを認め、自分を受け入れることが大切です。また、周りの人たちに対しても、自分が望むことや目標を伝えることで、理解してもらうことができるかもしれません。自分自身が自信を持って、自分の気持ちを伝えることが大切です。また、心理士やカウンセラーなどの専門家に相談することも考えられます。
拒絶されるのが怖いので、自分の意見をあまり話さない	そのような状況は、拒絶されることが怖いこともあるかもしれませんね。自分の意見を話すことが難しい状況であると感じると、自分自身の考えを壁にしてしまい、自分自身を孤立させることがあります。しかし、周りの人たちに対して自分の気持ちを伝えることは、自分自身を受け入れることができることがあります。また、周りの人たちに対して優しく、自分が望むことや目標を伝えることで、理解してもらうことができるかもしれません。自分自身が自信を持って、自分の気持ちを伝えることが大切です。また、心理士やカウンセラーなどの専門家に相談することも考えられます。
うつ病は10代の間にゆっくりと発症し始める	はい、うつ病は10代の高齢者においてゆっくりと発症し始めることが多いと言われています。高齢者は、経緯や生活習慣によって生活環境が変化し、ストレスや負担が増大することがあります。また、病気による死亡遺伝子や疾患による影響もあります。うつ病は、適切な治療法を受けることで改善することができますので、高齢者の方々は、症状がある場合は医師に相談し、適切な治療を受けることが大切です。
自分の外見や体に不満を感じ、完璧ではないと感じ、不安や焦ることが多い	そうですね、外見や体に不満を感じることは多いとされています。そのような感じ方は、自分自身を否定する思考に詰まっており、自己肯定感が低くなってしまいます。そのような状況では、自分自身を悪く批判することが多いため、ストレスや不安が生じることがあります。そのような状況にある場合は、自己受容を改善することが大切です。自己受容を良くするためには、自分自身を大切にし、自分自身の好みや価値観を大切にすることが必要です。また、自分自身に対して好意を持つことも大切です。自分自身を否定する思考を振り回し、自分自身を大切にしてみることで、自己肯定感が向上することが期待されます。
自分のやっていることは十分ではないのではないかといつも不安で、他人に褒められても悩みが消えない	そうですね、自己評価が低くなっているということは、多くの人にとっては深刻な問題です。自分自身が十分ではないと感じることは、自己肯定感を低くすることにつながります。そのような状況では、自分自身が十分であると感じられないため、自己肯定感が低くなり、不安や焦りを感じることがあります。また、他人から褒められても悩みが消えないということも、多くの人が経験しています。他人から褒められることで、自分自身の能力や成長が感じられることがありますが、それが自分自身の肯定感を低下させることもあります。そのような状況では、自己肯定感を高めることが大切です。自分自身に対して好意を持つことで、自己肯定感を向上させることができます。また、自分自身が十分であると感じられるように、自分自身を大切にし、自己肯定感を高めることが必要です。そのように、自分自身を大切にすることで、自己肯定感が向上することが期待されます。
読書するときも何かをするときも、集中力がますます難しくなり、すぐに気が散ってしまうようになった	集中力が低くなることが多いとされています。そのような状況では、集中力を高めることが必要です。一つの方法は、集中力を高めるための環境を作ることです。集中力を高めるためには、環境を条理にすることが大切です。例えば、電子デバイスを使い、書類や本を待たずに集中して、集中力を高めることができます。また、集中力を高めるためには、食事や睡眠を条理にすることも大切です。また、集中力を高めるためには、自分自身が集中していることを確実に感じつつも、気をつけることも大切です。集中力を高めるためには、集中していることを確実に感じつつも、気をつけることが必要です。例えば、定期的にループをしたり、身体的な運動を取ることで、集中力を高めることができます。そのように、集中力を高めるためには、環境を条理にし、自分自身が集中していることを確実に感じつつも、気をつけることが必要です。それらの方法を実践することで、集中力を高め…
いつも自分には価値がないと感じていて、自分の存在意義がわからず、虚しくて無力感を感じる毎日です。	そのような感じることは、多くの人にとってよくあるものです。そのような思いを抱えることは、孤独や不安、ストレスなどの感情に苦しむこともあります。しかし、自分に価値がないと感じることは、あくまでも一つの状態であり、自分自身を変えることができます。まずは、自分にとってどのようなことが興味や目的のあるものかを考えることが大切です。自分がやりたいことやどのように自分自身を成長させたいのかを明確にすることで、自分に価値があることを感じるようになるかもしれません。また、自分にとって本当に大切なことを見つけることも重要です。自分がやりたいことや何が本当に大切なのかを知ることで、自分自身が持つ価値が明らかになるかもしれません。自分問い合わせにくいと感じる場合は、心理カウンセリングを受けることも検討してみてください。カウンセリングは、心理的な問題に関するアドバイスや、自分自身についての理解を深めることができ…
私は人々と交流するのが怖くて、拒絶されたり、嘲笑されたり、誤解されたりするのが怖くて、孤独で無力感を感じることがよくありました。	それはとても辛いですね。交流を怖いと感じる人もたくさんいますよね。そのような気持ちを克服するためには、まずは自分自身に問いかけることが大切です。自分がどのような人間関係をしたいと思うのか、また、自分が怖いと感じる条件や状況は何ですか？自分自身が問いかけることで、自分が怖い理由や問題を把握して、改善することができるかもしれません。また、自分が怖いと感じる状況や場面を避けるときは、自分自身が抱える恐怖や不安を受け入れることが大切です。自分自身が怖いと感じるとき、自分自身を信じて、自分自身の過ちについて考え、改善することができるようになるかもしれません。最後に、自分自身を向上させるために、一歩ずつ進んでいくことも大切です。自分自身がやりたいことを見つけることで、自信を持って自分自身を向上させることができるかもしれません。
私は自分の外見や体型に大きな不満があり、醜くて魅力がないと感じており、整形して痩せることをよく考えましたが、手術のリスクも心配し、他人から嘲笑され、拒絶されるのではないかと恐れていました。	それはとてもつらい感じかもしれませんね。自分の外見や体型に不満を感じていることは、とても多くの人にとってもよくあることですよね。しかし、手術のリスクや他人からの嘲笑や拒絶など、そのようなリスクを考えることは、とてもつらいものですね。まずは、自分自身に問いかけることが大切です。自分が感じた不満や恐怖、自信のない状況について、どのようなことが原因かを考えてみましょう。自分自身がやりたいことを見つけることも大切です。自分自身がやりたいことがあれば、それに向かって取り組むことで、自信を持って自分自身を向上させることができるかもしれません。また、自分の外見や体型に対する不満や恐怖は、自分自身に対して感じたものであることを忘れないようにしましょう。自分自身にとって良いことをすることで、自分自身の自信を持つことができるかもしれません。最後に、自分自身に問いかけることが大切ですが、他人からの意見や評価も…
仕事のために夜更かしや残業が多くなり、体調がどんどん悪くなってしまうのですが、そうすることでしか自分の価値や能力を証明できないと思ってやめられません。	仕事のために夜更かしや残業が多くなってしまうと、健康に悪影響を与える可能性があります。そうすることで、自分の価値や能力を証明できないという正直性なんですが、長期的には健康面での負担が大きくなってしまう可能性があります。ストレスや疲労がたまり、業績が低下すると、ミスが続き、職場の評価も下がるという循環が生じます。そうすると、自分の価値や能力を証明できないとしても、続けることができないと思います。このような状況では、自分の価値や能力を証明するためには、健康を最優先に考え、仕事の安定性を確保することが大切です。また、職場でのストレスを軽減するために、自分の効率を強化するためのトレーニングや、ストレス解消法を学ぶことが推奨されます。さらに、仕事と休日のバランスを取ることも大切です。仕事にとっては、自分の価値や能力を証明するために、健康を最優先に考えることが大切です。
ゲームやソーシャルメディアにますます依存していくのを感じています。あたかもそれらが私の人生の不可欠な部分になっているかのようです。この依存から抜け出すことができず、自分を見失ってしまいます。この依存から抜け出す方法を見つけたいと思っています。	ゲームやソーシャルメディアにますます依存していくのを感じることは、現代社会において非常に一般的な傾向になっていることです。しかし、それらにとらわれすぎていないようにするためには、自分自身のバランスを取り戻すことが必要です。以下は、依存から抜け出すための一般的な方法です。1. 目標を設定する自分自身の目標を明確にすることが重要です。その目標を達成するために必要な行動を計画することで、自分自身の生活に対するバランスを取り戻します。2. 副業や趣味を見つける自分自身の仕事やプライベートのバランスを取るために、副業や趣味を見つけることが効果的です。それらを通じて、自分自身の新しいスキルや刺激を得ることができます。3. 健康を考える健康が劣ると、依存から抜け出すことが難しくなります。適度な運動や食事、十分な睡眠をとることで、精神的なバランスを取り戻し、ストレスを軽減することができます。4. 友達や…
私の気分はいつも浮き沈みがあり、とても幸せなときもあれば、自殺したいほど落ち込むときもありました。とても悩まされます。	悩みを抱えることは、人生において非常に一般的なことです。しかし、それらに対してどうすればより良い結果を得られるのでしょうか。以下は、一般的なアドバイスです。1. 自分自身を信じる自分自身に対して、信頼を持ち、自分自身を肯定的に捉えることが大切です。自分自身に対して素直であり、自分の感情を正直に表現することができるようになることが、幸せな生活を送るために必要です。2. 心理カウンセリングを受ける心理カウンセリングを受けることで、自分自身の感情や行動について、より深く理解することができます。心理カウンセリングは、専門家があなたの感情や行動にフォーカスしながら、コーチングやアドバイスを提供することができます。3. 自分自身の行動を変える自分自身の行動を変えることで、自分自身の感情変化を減らすことができます。例えば、運動をすることで、ストレスを軽減することができます。また、自分自身の趣味や興味に…
時々、誰も私のことなど気にしていなくて、本当に頼りにできるのは私だけだと感じることがあります	自分自身が頼りにできることを信じることは、人生において非常に重要です。しかし、それは自分自身にとっての問題であり、人間関係を壊す可能性があります。以下は、一つの対策です。1. 自分自身を肯定的に捉える自分自身に対して素直であり、自分自身を信じることが大切です。自分自身に対して素直であり、自分自身の感情を正直に表現することができるようになることが、頼りにできる人として成長できます。2. 他人とのコミュニケーションを深める自分自身だけが頼りにできるというと、他人とのコミュニケーションを深めることができないということもあるかもしれません。それを改善するためには、自分自身のプライベートを共有することが大切です。自分自身のプライベートを共有することで、他人とのコミュニケーションが深まり、頼りになることができるようになるかもしれません。3. 自分自身の感情を正しく表現する自分自身の感情を正しく表現す…
最近不眠症になることが多く、夜も寝返りを打ってしまうのですが、それは精神的な問題が潜んでいるのでしょうか？	不眠症が原因で寝返りが打ちたくなる場合、精神的な問題が潜んでいる可能性があります。不眠症は、睡眠不足が原因で発症する疾患であり、精神的な問題がその一部として挙げられます。不眠症は、ストレスやうつ病、抑うつ症、抑うつ症状などの精神的な問題が原因で発症することが多いため、精神的な問題が原因である可能性が高いです。不眠症は、睡眠不足の原因となる疾患の一つであり、症状が改善されるためには、睡眠の改善が必要です。また、精神的な問題の治療も必要な場合があります。精神的な問題が原因である場合は、専門家に相談することが重要です。
家族との関係は決して良好ではありません。家族は私を理解してくれず、尊重してくれないように感じます。それが私を孤独に感じさせます。	家族との関係が良好になっていない場合、それは非常につらいことですね。家族とのコミュニケーションの不足や、孤独感を感じることは、様々な心理的問題を引き起こす可能性があります。また、このような状況にある場合、心理カウンセリングによって自分の気持ちを解決し、問題を解決するためのアドバイスを受けることが重要です。カウンセリングを受けることで、自分の気持ちを受け入れ、自分自身を理解し、家族との関係を改善する方法を見つけることができるかもしれません。
心の中で空虚で孤独を感じることが多く、その空虚感を埋める何かを探していますが、その感情を和らげる適切な方法が見つからないことがよくあります。	そのような感情を和らげるためには、いくつかの方法があります。まずは、自分自身に対して正直に話を聞くことが大切です。自分自身を許し、自分に対する理解を持ち続けることが重要です。また、自分にとって有益なアクティビティを見つけることも効果的です。例えば、運動や読書、彩りやきなりなど、自分が楽しめることを取り入れることで、心の中を落ち着かせることができます。また、周りの人々との交流や、自分の興味に合った人との出会いを増やすことも、孤独感を減らすことができます。最後に、心理カウンセリングを受けることも有効です。カウンセラーは、自分の心理について正直に話を聞かせることができ、専門的なアドバイスを提供することができます。
