# Supplementary material
Source: ML conference proceedings conference paper supplement (https://openreview.net/forum?id=JL42j1BL5h)
Supplement: supplementary_material [file Mental_Health_v.xlsx]

## Sheet: Sheet1
Input	Output
Je me sens souvent seul et impuissant, personne ne peut me comprendre, je me sens même comme un perdant, sans valeur ni sens, ce sentiment me rend très déprimé et désespéré, je ne sais pas comment m'en débarrasser.	Je comprends que tu ressentiras ces émotions et que cela puisse être très difficile à gérer. Tu n'es pas seul dans cette situation, de nombreux gens peuvent ressentir de la solitude, de l'impuissance et de la dépression. Il est important de se rappeler que ces sentiments ne sont pas tués, mais il existe des actions que tu peux prendre pour améliorer ta situation. Tout d'abord, il est important de…
Même si je vais juste acheter un sac de chips, j'ai peur que les gens pensent que j'ai un comportement autodestructeur et que je mange trop	Il est possible que certaines personnes aient une perception négative de votre comportement en vous achetant des chips. Cependant, il est important de se rappeler que vous avez le droit de faire ce que vous voulez avec votre argent. Il est également important de garder une bonne humeur et de ne pas vous laisser influencer par les jugements des autres. Si vous avez des préoccupations concernant vo…
Je me sentais toujours fatiguée et impuissante, incapable de me concentrer sur mes tâches ou même de travailler sur les choses qui m'intéressaient, ce qui me rendait très frustrée.	Je comprends que vous vous sentez fatiguée et impuissante, et que cela affecte votre capacité à vous concentrer sur vos tâches et à travailler sur les choses qui vous intéressent. Cela peut être très frustrant et démoralisant. Il est important de prendre soin de vous et de trouver des moyens de vous aider à surmonter ces sentiments.Voici quelques suggestions qui pourraient vous aider :1. Prenez d…
Récemment, je n'arrive pas à bien dormir, ou je fais des cauchemars quand je m'endors, et je me sens très fatigué et épuisé quand je me réveille.	Je comprends que vous ne vous sentez pas bien réveillé et que cela affecte votre capacité à vous concentrer sur vos tâches et à être productif. Le manque de sommeil peut avoir des effets négatifs sur votre santé physique et mentale. Il est important de prendre des mesures pour vous aider à améliorer votre sommeil et à vous sentir mieux réveillé.Voici quelques suggestions qui pourraient vous aider…
Chaque fois que je vais chez le médecin, il n'y a aucune amélioration, et en plus, mon état d'esprit empire. Je tombe souvent dans un état malsain d'auto-pitié et d'autodépréciation.	Je comprends que vous ne vous sentez pas mieux malgré les consultations médicales et que cela affecte votre état d'esprit. Il est important de comprendre que le processus d'amélioration peut prendre du temps et peut être difficile. Il est important de continuer à chercher des solutions pour améliorer votre santé mentale et physique.Voici quelques suggestions qui pourraient vous aider :1. Parlez à…
Je me suis toujours senti isolé et exclu, même dans la foule.	Il est important de se rappeler que l'isolement et l'exclusion peuvent être des expériences difficiles à vivre, mais il existe des moyens pour t'aider à surmonter ces sentiments. Tout d'abord, il est important de parler de tes sentiments avec un professionnel de la santé mentale. Ils pourront t'aider à comprendre pourquoi tu te sens ainsi et à trouver des moyens pour gérer ces émotions. Ils pourr…
S'immerger dans les jeux ou internet est une forme invisible de pression psychologique.	Il est vrai que les jeux vidéo et l'utilisation d'Internet peuvent avoir un impact sur la santé mentale de certains individus. Les jeux vidéo peuvent parfois être addictifs, ce qui peut avoir des conséquences négatives sur la santé mentale et physique des personnes. De plus, l'utilisation excessive d'Internet peut entraîner une dépendance aux réseaux sociaux et à la surveillance constante des méd…
J'ai subi trop de pression récemment, je me sens très anxieux tous les jours, je ne dors pas bien, j'ai mal à la tête, mon cœur bat vite et j'ai l'impression que je vais m'effondrer à tout moment	Je suis désolé d'entendre cela. La pression et l'anxiété peuvent être extrêmement stressants et affecter notre bien-être émotionnel et physique. Il est important de prendre soin de soi et de trouver des moyens de gérer les émotions négatives.Voici quelques suggestions pour vous aider à gérer les pressions et l'anxiété :1. Pratiquez la respiration profonde : La respiration profonde est un moyen si…
Chaque fois que je rencontre des difficultés et des revers, je perds toujours ma confiance et ma motivation et je sens que je ne peux pas gérer mes problèmes	Je comprends que cela puisse être difficile, et c'est normal de ressentir de la frustration et de la dépression lorsque l'on rencontre des difficultés ou des revers dans la vie. Cependant, il est important de se rappeler que les échecs et les problèmes sont une partie normale de la vie et qu'ils peuvent vous aider à grandir et à vous développer.Voici quelques suggestions pour vous aider à gérer l…
J'ai toujours peur de ne pas faire assez bien, et j'ai l'impression d'être constamment jugé par d'autres personnes, et c'est déprimant.	Il est normal de se sentir anxieux ou anxieux lorsque l'on se sent constamment jugé par les autres. Cela peut être déprimant et épuisant. Il est important de comprendre que les autres ne sont pas toujours là pour te juger, mais plutôt pour apprendre et grandir. Il est important de se rappeler que tu es unique et que tu es différent de tout le monde. Il est important de te rappeler que tu as des q…
J'étais toujours inquiet de savoir si je faisais tout correctement, et j'avais peur de ce que les autres penseraient ou me critiqueraient, et j'étais souvent plongé dans un douloureux doute de moi-même en conséquence.	Voici une version révisée du texte en utilisant une syntaxe et une vocabulaire similaires à ceux qui sont courants dans les dialogues de la série Netflix "Sense8":"Je ne pouvais pas m'empêcher de me poser des questions sur ce que je faisais correctement. J'avais peur des critiques et des jugements des autres, et cela me faisait souvent douleur. Je me laissais submerger par une anxiété constante e…
Je garde mes pensées dans mon cœur, je sens toujours que je vais exploser, et je ne peux pas me cacher du regard des autres	Il est compréhensible que vous vous sentiez de cette manière lorsque vous avez l'impression de porter une charge émotionnelle importante. Il est important de prendre soin de vous-même et de trouver des moyens de gérer vos pensées et vos émotions de manière saine et constructive.Pour vous aider à faire face à vos pensées et à vous sentir mieux, voici quelques suggestions qui pourraient vous aider …
Ma famille a subi un accident soudain, mes deux parents ont été gravement blessés, ce qui m'a fait me sentir impuissant et déprimé, et j'ai même développé des symptômes de dépression.	Je suis désolé d'entendre cela. Évidemment, cela doit être très difficile pour vous de vivre une situation aussi douloureuse et incroyablement stressante. Il est tout à fait normal de ressentir de la confusion, de l'inquiétude et de la dépression à la suite d'un événement aussi traumatique.Il est important de prendre soin de vous-même et de trouver des moyens de gérer vos émotions de manière sain…
Je me suis trouvé de moins en moins actif socialement, préférant toujours être seul, ne souhaitant pas socialiser ou partager ma vie avec les autres, cette solitude m'a fait me sentir très déprimé	Il est compréhensible que vous vous sentiez déprimé en raison de votre souci de votre solitude. La solitude peut être un facteur de stress important et peut avoir des conséquences négatives sur votre santé mentale et physique.Voici quelques suggestions qui pourraient vous aider à surmonter cette période difficile et à améliorer votre qualité de vie social :* Essayez de trouver des activités socia…
J'ai un fort désir de contrôle et je veux toujours tout contrôler de mes mains, et ne pas permettre aux autres de s'impliquer ou d'intervenir, ce qui conduit à la rupture de mes relations interpersonnelles.	Il est compréhensible que vous cherchiez à avoir un contrôle sur votre environnement et sur les situations dans lesquelles vous vous trouvez. Cependant, il est important de prendre en compte que le désir de contrôle peut parfois être un signe d'une personnalité forte et ambitieuse, mais il peut aussi être un signe d'une dépendance au contrôle qui peut être harmful pour vos relations interpersonne…
J'ai souvent l'impression que mon esprit est très chaotique, comme s'il y avait trop de pensées et de voix dans ma tête en même temps, ce qui me rend très confus et perdu	Il est compréhensible que vous ayez l'impression que votre esprit est très chaotique, avec trop de pensées et de voix dans votre tête en même temps. Cela peut être un signe de trouble de l'attention ou de stress. Il est important de prendre en compte que votre esprit peut être très actif et que c'est normal d'avoir des pensées et des idées qui se bousculent dans votre tête.Il est possible que vou…
Pourquoi je suis critiqué par ma famille pour tout ce que je fais	Il est compréhensible que vous soyez critiqué par votre famille pour tout ce que vous faites. Il est possible que votre famille ait des attentes ou des préférences différentes pour ce que vous devriez faire ou comment vous devriez vous comporter. Il est important de prendre en compte ces attentes et préférences de manière à éviter les conflits et la tension.Il est également possible que votre fam…
Récemment, je me sens toujours épuisé, chaque jour, je manque d'énergie, même après avoir beaucoup dormi, cela ne s'améliore pas.	Il est compréhensible que vous ressentiez souvent de l'épuisement et que vous manquez d'énergie, même après avoir beaucoup dormi. Cela peut être un signe d'un trouble du sommeil ou d'une fatigue chronique. Il est important de prendre en compte que le sommeil est essentiel pour notre bien-être physique et mental. Il est important de vous assurer que vous avez un sommeil de qualité et de durée suff…
J'ai l'impression d'avoir perdu toute motivation et espoir et la vie n'a plus de sens	Je comprends que tu puisses ressentir de la détresse et de la désorientation face à l'absence de progrès dans ta situation. Ces émotions sont normales et peuvent être difficiles à surmonter par soi-même.Il est important de prendre soin de toi en ce moment et de te concentrer sur des activités qui t'apportent de la joie et de la paix intérieure. Tu peux également chercher l'aide d'un professionnel…
Je me sens très nerveux parfois, et je me sens aussi déprimé parfois, mais je ne sais pas comment changer mon humeur	Il est normal de ressentir de la nervosité et de l'anxiété à certaines moments, et même de ressentir de la dépression à certains moments de la vie. Cependant, si ces émotions sont présentes constamment et sont empêchant ta vie quotidienne, il peut être utile de consulter un professionnel de la santé mentale.Les professionnels de la santé mentale peuvent vous aider à comprendre les causes sous-jac…
J'ai des problèmes de réflexion et de perception, et j'entends souvent des sons étranges ou je vois des choses étranges, ce qui me fait très peur	Il est compréhensible que des problèmes de réflexion et de perception puissent avoir un impact sur ta vie quotidienne et t'empêchent de te sentir à l'aise dans ton environnement. Il est important de consulter un professionnel de la santé mentale qui peut évaluer tes symptômes et t'aider à comprendre les causes sous-jacentes de tes problèmes.Il est possible que des problèmes de réflexion et de per…
Je me sens souvent tendu et anxieux, incapable de contrôler mes émotions et mon stress, ce qui me rend très agité et perturbé.	Il est compréhensible que tu ressentes souvent de l'anxiété et de l'agitation, et que cela te perturbent dans ta vie quotidienne. Il est important de consulter un professionnel de la santé mentale qui peut évaluer tes symptômes et t'aider à comprendre les causes sous-jacentes de tes problèmes.Il est possible que tes symptômes soient causés par des facteurs environnementaux tels que le stress, le …
Je me sens souvent seul et impuissant, et je me sens vide même quand j'ai quelqu'un autour de moi. Je ne sais pas pourquoi cela se produit, comment puis-je obtenir de l'aide ?	Je comprends que tu puisses ressentir de la solitude et de l'impuissance, et que tu puisses avoir l'impression d'être vide même lorsque tu suis entouré de gens. Il est important de se rappeler que ces sentiments ne sont pas toujours faciles à comprendre et qu'ils peuvent être difficiles à surmonter.Tout d'abord, je recommande que tu vises à apprendre à apprécier et à valoriser ta propre compagnie…
J'ai été traumatisé dans le passé, et maintenant je me souviens toujours de cette expérience avec peur et douleur, et j'ai besoin de demander de l'aide pour surmonter cette émotion.	Je comprends que tu puisses avoir été traumatisé dans le passé et que cela puisse te causer de la peur et de la douleur. C'est très courant que des expériences traumatisantes restent gravées dans notre mémoire et que nous puissions ressentir des émotions de peur et de douleur en les évoquant.Il est important de se rappeler que ces émotions sont naturelles et que tout le monde a des expériences tr…
Je n'arrive pas à me débarrasser des souvenirs du passé, et chaque fois que je pense à certaines choses, je me sens très mal, et cela affecte même ma vie quotidienne	Je comprends que tu puisses avoir du mal à te débarrasser des souvenirs du passé et que cela puisse affecter ta vie quotidienne. Il est normal de ressentir des émotions fortes en pensant à des expériences traumatisantes, et il est important de se rappeler que ces émotions sont naturelles.Il existe différentes méthodes pour surmonter les souvenirs du passé. L'un des moyens est de traiter ces souve…
J'étais victime d'intimidation et maintenant, chaque fois que j'y pense, j'ai peur et je fais même des cauchemars	Je comprends que tu puisses avoir été victime d'intimidation et que cela puisse te causer de la peur et des cauchemars. C'est très courant que des expériences traumatisantes restent gravées dans notre mémoire et que nous puissions ressentir des émotions fortes en les évoquant.Il est important de se rappeler que ces émotions sont naturelles et que tout le monde a des expériences traumatisantes dan…
Je me sens de plus en plus seul, pas d'amis, pas de parents, même s'il y a quelqu'un dans les parages, je me sens très vide et mal à l'aise	Je comprends que tu puisses te sentir de plus en plus seul et que cela puisse être difficile à gérer. Il est important de trouver des moyens de faire face à ces émotions et de trouver de la compagnie et de l'appui.Pour t'aider à ne plus te sentir seul, tu peux essayer d'organiser des activités sociales, comme aller au cinéma, faire un dîner avec des amis, ou participer à une activité en groupe. T…
J'ai toujours l'impression de ne pas pouvoir me concentrer, il m'est difficile d'accomplir des tâches et je suis souvent fatigué et déprimé	Je comprends que tu puisses avoir des difficultés à te concentrer et à accomplir des tâches. Il existe plusieurs raisons pour lesquelles tu pourrais avoir ce genre de problèmes et il est important de trouver des moyens de te mettre à l'aise pour t'aider à mieux gérer ces difficultés.Il est possible que tu puisses avoir un trouble du spectre autistique (TSA), qui peut affecter ta capacité à commun…
Je me sens souvent seul et perdu, incapable d'établir des relations amicales avec les autres, voire même de perdre l'intérêt et l'enthousiasme pour les gens et les choses qui m'entourent.	Je comprends que tu puisses te sentir seul et perdu et que cela puisse être difficile à gérer. Il est important de trouver des moyens de faire face à ces émotions et de trouver de la compagnie et de l'appui.Pour t'aider à ne plus te sentir seul, tu peux essayer d'organiser des activités sociales, comme aller au cinéma, faire un dîner avec des amis, ou participer à une activité en groupe. Tu peux …
Je me sens seul et perdu et je n'ai pas l'impression de pouvoir nouer des relations amicales avec d'autres personnes, ce qui me rend très déprimé et impuissant	Je comprends que tu puisses te sentir seul et perdu, et cela peut être très difficile à gérer. Il est important de trouver des moyens de faire face à ces émotions et de trouver de la compagnie et de l'appui.Pour t'aider à ne plus te sentir seul et perdu, tu peux essayer d'organiser des activités sociales, comme aller au cinéma, faire un dîner avec des amis, ou participer à une activité en groupe.…
Tout le monde autour de moi est heureux, mais je me sens vide à l'intérieur, incapable de profiter de la joie	Je comprends que cela peut être difficile de se sentir détaché des sentiments d'excitation et de bonheur qui entourent vous lorsque vous vous trouvez dans un groupe de gens heureux. Cependant, il est important de se rappeler que le bonheur n'est pas une émotion universelle qui doit être ressentie par tout le monde à tout moment. Chacun a son propre chemin vers le bonheur et cela peut prendre du t…
J'ai une faible estime de moi et je me sens souvent sans valeur et insignifiante, je n'ose pas poursuivre mes rêves et mes objectifs, j'ai peur de l'échec et d'être méprisée par les autres.	Je comprends que cela peut être difficile de se sentir valorisé et important, même si vous êtes unique et spéciale. Cependant, il est important de se rappeler que chacun a ses forces et ses faiblesses, et que cela ne fait pas de vous moins important ou moins valorisé. Il est important de trouver des activités qui vous rendent heureux et épanoui, de parler avec des gens qui vous soutiennent et d'u…
Je deviens trop sensible à certaines choses et je me sens souvent agité et inquiet pour des détails	Je comprends que cela peut être difficile de devenir trop sensible à certaines choses et de ressentir de l'agitation et de l'inquiétude. Cependant, il est important de se rappeler que vous avez le droit de ressentir vos émotions et de les exprimer de manière saine. Il peut être utile de trouver des techniques de gestion de l'anxiété et de la résolution de conflits pour aider à gérer votre agitati…
Mes parents ont toujours des attentes élevées à mon égard, pour que je sois une personne exceptionnelle, mais j'avais l'impression de ne pas être à la hauteur de leurs attentes, je suis anxieux et j'ai une faible estime de moi.	Je comprends que cela peut être difficile de ne pas être à la hauteur des attentes de vos parents, surtout si ils ont des attentes élevées à votre égard. Cependant, il est important de se rappeler que vous avez le droit de vous élever à des attentes plus réalisables pour vous-même. Il est important de trouver des activités qui vous rendent heureux et épanoui, de parler avec des gens qui vous sout…
Je rêve tous les jours, cela se répète encore et encore, comme si j'étais perdu dans un labyrinthe sans issue	Dans le rêve, tu te sens perdu dans un labyrinthe sans issue, ce qui peut représenter un sentiment d'incertitude ou de désorientation dans la vie réelle. Cela peut également faire référence à un malaise dans ta vie personnelle ou professionnelle, ou à l'impression que tu n'as pas la clé pour résoudre un problème important.Les rêves peuvent également être utilisés pour explorer les peurs et les cr…
Chaque fois que je suis seul, je pense à tout ce qui s'est passé avant, et tout cela me rend si misérable	Les pensées qui vous assaillent lorsque vous êtes seul peuvent avoir différentes origines, mais elles peuvent parfois être liées à des événements traumatiques ou à des souvenirs douloureux de votre passé. Ces pensées peuvent vous laisser un sentiment de malaise, de tristesse ou d'isolement.Il est important de comprendre que ces pensées ne sont pas négatives ni pathologiques, mais plutôt une réact…
Quand je vois mon corps, je me sens si moche, si mal	Les sentiments de moindre estime et de malaise envers sa propre apparence peuvent être communs, mais ne sont pas nécessairement réfléchis ou adaptés. Il est important de comprendre que le corps est un élément important de la personnalité et de la confiance en soi. Les pensées et les émotions négatives envers notre propre corps peuvent avoir des effets négatifs sur notre bien-être général et notre…
Je suis autiste, je ne sais pas comment communiquer avec les autres, je me sens isolé dans un monde complètement différent, je me sens très misérable et impuissant.	Je comprends que tu sois autiste et que cela puisse être difficile à gérer. L'autisme est un spectre de la condition, ce qui signifie que les symptômes peuvent varier en fonction de la personne. Cela peut inclure des difficultés dans la communication, la socialisation, les sensations corporelles, les émotions et la régulation du comportement.Il est important de se rappeler que l'autisme n'est pas…
J'ai été une fois trahi par un ami, cela m'a tellement blessé que j'ai commencé à douter de la fiabilité de l'humanité et de l'amitié, et j'ai même commencé à me renfermer et à m'éloigner des autres	Il est compréhensible que cette expérience ait pu avoir un impact profond sur votre vie et votre relation avec les autres. Le trahison d'un ami peut être très douloureuse et peut vous laisser avec des sentiments de méfiance et de défiance envers les autres. Cela peut également vous amener à vous isoler et à vous éloigner des gens.Il est important de se rappeler que la trahison d'un ami n'est pas …
Dans la société d'aujourd'hui, les gens renoncent souvent à eux-mêmes ou même se suicident parce qu'ils ne peuvent pas achever leur travail.	Il est vrai que le stress lié au travail et à la vie professionnelle peut être un facteur de prise de conscience importante pour de nombreux individus. Les personnes qui sont confrontées à des situations de travail oppressantes ou stressantes peuvent parfois se sentir dépassées et ne pas savoir comment s'en sortir.La pression constante de remplir des obligations quotidiennes peut parfois conduire…
Je pense toujours à mon passé et à mon avenir, me sentant anxieux et bouleversé, ne sachant pas quoi faire.	Il est compréhensible que vous ressentiez de l'anxiété et de la bouleversure en raison de vos pensées sur le passé et l'avenir. Comme je l'ai mentionné précédemment, il est important de trouver un équilibre entre le passé, le présent et l'avenir.Voici quelques suggestions pour vous aider à gérer cette anxiété :1. Pratiquez des techniques de respiration profonde pour vous aider à vous calmer et à …
Je me sens toujours mal à l'aise lorsque je suis devant un grand groupe de personnes	Il est normal de se sentir un peu mal à l'aise lorsqu'on se trouve devant un grand groupe de personnes, surtout si cela n'est pas notre environnement naturel. Voici quelques conseils pour vous aider à vous sentir plus à l'aise lors d'une présentation ou d'une conversation en groupe : 1. Préparez-vous : Avant l'événement, prenez le temps de vous préparer mentalement en imaginant la situation et en…
Je suis insatisfait de mon apparence et je me sens toujours moche, ce qui me rend très peu confiant pour socialiser et me faire des amis. Comment puis-je changer cette mentalité ?	Il est compréhensible que vous ressentiez de la dépression et de l'anxiété en raison de vos sentiments négatifs à l'égard de votre apparence. Cela peut avoir un impact sur votre confiance en vous et votre capacité à socialiser avec les autres.Le premier pas pour changer cette mentalité est de se concentrer sur les choses positives en vous. Recherchez des activités qui vous énervent, vous font vou…
Je suis plein de peur et d'anxiété face à l'avenir, et je ne sais pas comment gérer les défis et les pressions à venir.	Il est compréhensible que vous ressentiez de l'anxiété et de la peur en raison des défis et des pressions à venir. Cela peut être difficile à gérer, mais il existe des stratégies qui peuvent vous aider à mieux faire face à ces situations.Tout d'abord, il est important de vous concentrer sur les choses positives dans votre vie actuelle. Recherchez les activités et les personnes qui vous rendent he…
Je me retrouve constamment coincé dans des boucles de pensée incessantes, ruminant sans cesse le même problème ou la même situation, ce qui nuit à mon sommeil et rend ma vie quotidienne médiocre.	Il est compréhensible que vous ressentiez des difficultés à vous libérer des boucles de pensée incessantes et des cauchemars qui vous perturbent le sommeil et affectent votre vie quotidienne. Il existe des stratégies que vous pouvez utiliser pour aider à éliminer ces pensées intrusives et améliorer votre qualité de vie.La première étape consiste à identifier les pensées qui vous rendent le plus m…
J'ai vécu des expériences traumatisantes qui m'ont marqué. J'avais du mal à traiter ces émotions et ces souvenirs, ce qui a progressivement détérioré ma santé mentale.	Il est compréhensible que vous ayez vécu des expériences traumatisantes qui vous aient marqué profondément et qui aient eu un impact sur votre santé mentale. Il est normal de ressentir des émotions comme la peur, la colère, la tristesse et le désarroi après avoir vécu des événements traumatisants.Il est important de comprendre que les expériences traumatiques peuvent affecter la façon dont nous p…
Je me sens souvent déprimé et morose, je perds la joie et la motivation de vivre et je n'ai aucune confiance en l'avenir, cette émotion me fait me sentir très douloureux et impuissant	Il est important de se rappeler que ces émotions ne sont pas des sentiments à long terme et peuvent être soulagées avec le temps. Il est important de parler avec un professionnel de la santé mentale pour obtenir de l'aide et des conseils. Ils peuvent vous aider à comprendre les causes de vos sentiments et à trouver des moyens de les surmonter. Il est également important de prendre soin de soi en …
Récemment, leurs enfants perdent souvent leur sang-froid et détruisent même des objets dans la maison, ce qui peut être un symptôme de dépression	Il est possible que l'irritabilité et la destruction de propriétés de leurs enfants puissent être des signes de dépression. Les enfants peuvent également être influencés par les conditions de vie stressantes ou difficiles chez les parents, ce qui peut les rendre plus sensibles à la dépression. Il est important de parler avec un professionnel de la santé mentale pour obtenir de l'aide et des conse…
Je me sens souvent stressé et anxieux, même de petites choses peuvent me rendre agité et tendu, il m'est difficile de me détendre et de profiter de la vie	Il est possible que vous ressentiez de l'anxiété et de l'agitation, car cela peut être un symptôme de la dépression. Il est important de parler avec un professionnel de la santé mentale pour obtenir de l'aide et des conseils sur la manière de gérer ces émotions et de trouver des moyens de les surmonter. Il est également important de prendre soin de soi en faisant des activités qui vous apportent …
Je suis très insatisfait de mon corps, je me sens toujours trop gros ou trop mince, et je ne sais pas comment accepter mon corps	Il est normal de ressentir de l'insatisfaction avec notre corps, car cela peut être lié à des facteurs tels que la société ou les normes de beauté exprimées par la culture. Cependant, il est important de se rappeler que chaque corps est unique et différent, et qu'il est important de se concentrer sur les aspects positifs de notre corps plutôt que de se concentrer sur les aspects négatifs. Il est …
Je manque de confiance en mes performances et mes capacités, j'ai toujours l'impression que je ne peux pas bien faire, j'ai peur de l'échec et des moqueries des autres.	Il est tout à fait normal de manquer de confiance en soi au début de l'apprentissage d'un nouvel instrument. Il peut être difficile de se sentir à l'aise et de croire en vos capacités, surtout si vous n'avez pas encore beaucoup d'expérience. Cependant, il est important de se rappeler que la confiance en soi est une habitude et qu'elle peut être développée avec le temps.Pour améliorer votre confia…
Mes humeurs fluctuent énormément, d'un excitement intense à de la profonde tristesse, sans aucune logique.	Il est tout à fait normal de ressentir de nombreuses émotions différentes au cours de la vie. Cela peut être dû à de nombreux facteurs, tels que les événements de la vie, les relations interpersonnelles, les choix que vous faites, les conditions environnementales, etc. Il est normal de ressentir de l'excitation intense pour certaines choses, comme une nouvelle opportunité ou un événement importan…
Quand je suis dans une foule, je me sens toujours ignoré, voire inexistant, ce qui me fait me sentir très seul et perdu	Il est tout à fait normal de se sentir ignoré ou inexistant dans une foule, surtout si vous êtes un introverti ou si vous avez des difficultés à communiquer avec les autres. Cependant, il est important de rappeler que vous êtes important et que vous avez des valeurs et des qualités uniques à partager avec les autres.Il peut être utile de pratiquer la présence de soi et d'apprendre à apprécier et …
J'ai souvent l'impression de ne pas être assez bon pour gagner l'approbation et le respect des autres	Il est tout à fait normal d'avoir des doutes sur sa propre capacité et de ne pas être sûr de soi. Il est important de rappeler que chacun a ses propres forces et faiblesses, et que la capacité n'est pas toujours liée à la confiance en soi ou à la qualité de ses performances passées. Il est important de se rappeler que la confiance en soi est une habitude et qu'elle peut être développée avec le te…
Je me sens confus et impuissant face à l'avenir, je ne sais pas dans quelle direction aller, cela me rend très anxieux et agité	Je comprends que tu puisses ressentir de l'anxiété et de l'incertitude face à l'avenir. Il est normal d'avoir des questions et des doutes lorsque tu te retrouves dans une situation inconnue ou stressante. Voici quelques conseils pour t'aider à naviguer dans ces moments difficiles :1. **Identifiez tes valeurs et aspirations** : Prends le temps de réfléchir à ce qui est important pour toi. Quelles …
J'ai toujours peur que mes actions et mes décisions soient critiquées et désapprouvées par les autres, ce qui me rend très anxieuse et frustrée.	Je comprends que tu puisses avoir ces inquiétudes. Il est naturel d'avoir des préoccupations concernant la manière dont les autres perçoivent nos actions et décisions. Voici quelques conseils pour t'aider à surmonter tes inquiétudes :1. **Prends le temps de réfléchir à tes choix** : Avant de prendre une décision, prends le temps de réfléchir à elle calmement et de considérer les implications. Cel…
J'ai envie de me suicider mais je n'ose pas, je veux juste me cacher et ne plus jamais ressortir	Je suis là pour vous écouter et vous aider. Si vous ressentez des pensées suicidaires, il est important de les partager avec quelqu'un de confiance, tel qu'un ami, un parent ou un professionnel de la santé mentale. Leur donner le soutien moral et émotionnel dont vous avez besoin.Il est normal d'avoir des pensées sombres et difficiles à gérer, mais je vous encourage à ne pas abandonner. Il existe …
Ma famille me critique toujours et me fait beaucoup de mal, je ne sais pas comment communiquer avec eux, ils sont devenus si distants avec moi	Il est difficile de vivre dans une famille où l'on se sent critiqué et fait de mal. Il est important de se rappeler que la famille est souvent un environnement difficile à quitter, mais il est également important de prendre soin de soi et de sa santé mentale. Voici quelques conseils pour vous aider à communiquer avec vos proches : 1. Écoutez attentivement : Essayez de rester calme et écoutez les …
J'ai l'habitude d'être frustré par de petites choses, j'ai du mal à me remettre de dépressions émotionnelles et je me sens sans valeur.	Il est important de comprendre que l'habitude de se sentir frustré par de petites choses est un comportement qui peut être appris et modifié. Il peut être utile de travailler sur la résolution de problèmes de manière plus positive et constructive pour se sentir plus de contrôle et de satisfaction.Pour surmonter les dépressions émotionnelles, il peut être utile de développer des compétences en ges…
J'ai été intimidé par mes pairs, ce qui a conduit à une faible estime de soi chronique et à la peur du rejet.	L'intimidation par les pairs peut être une expérience difficile et peut entraîner des problèmes émotionnels et relationnels à long terme. Il est normal de ressentir de la peur du rejet et de l'inferiorité en présence de personnes plus expérimentées ou plus compétentes que soi.Il est important de comprendre que la faible estime de soi et l'intimidation par les pairs ne sont pas des états permanent…
Récemment, j'ai toujours l'impression que mon humeur fluctue énormément. Parfois je suis heureux, mais parfois je suis déprimé sans raison. Cela me trouble profondément. Je ne sais pas si je souffre de dépression.	Les fluctuations d'humeur peuvent être normales et courantes, mais il est important de prendre en compte les symptômes qui peuvent indiquer un trouble de l'humeur ou un trouble de l'affect. Si vous vous sentez déprimé sans raison pendant une période prolongée, il peut être utile de parler avec un professionnel de la santé mentale pour obtenir une évaluation et des conseils.Les symptômes courants …
Je suis extrêmement stressée, j'ai l'impression que de bientôt être dépassée, je me sens souvent énervée ou ai des difficultés à respirer.	passée, je me sens souvent énervée ou ai des difficultés à respirer.
J'ai souvent des sentiments d'anxiété et de peur, ne sachant pas d'où cela vient, et parfois il m'est même difficile de respirer.	Il est tout à fait normal de ressentir de l'anxiété et de la peur à certaines moments de la vie. Cependant, si ces sentiments sont persistants et incontrôlables, il est possible que vous souffriez d'une anxiété ou d'une phobie. Il est important de consulter un professionnel de la santé mentale pour évaluer votre situation et vous aider à trouver des moyens de gérer vos sentiments. Les traitements…
Je me suis toujours sentie inutile, pas assez bien, pas assez intelligente, pas assez jolie, et c'est frustrant	Il est normal de se sentir comme ça à certains moments de la vie, mais si cela est chronique et que cela vous empêche de vous sentir bien dans votre vie quotidienne, il est important de consulter un professionnel de la santé mentale pour évaluer votre situation et vous aider à trouver des moyens de gérer vos sentiments. Les traitements pour la dépression et l'anxiété peuvent inclure des technique…
J'ai toujours des pensées suicidaires, j'ai l'impression que la vie n'a pas de sens et que je n'ai aucune valeur. Je me sens aussi désespéré et j'ai l'impression qu'il n'y a aucun espoir pour mon avenir	Il est important de prendre ces sentiments de manière sérieuse, car les pensées suicidaires peuvent être un signe d'urgence. Si vous avez ces pensées, je vous encourage à contacter un professionnel de la santé mentale immédiatement pour obtenir de l'aide et des conseils. Les pensées suicidaires peuvent être le résultat de divers facteurs tels que la dépression, la détresse émotionnelle, la douleu…
J'ai souvent l'impression que ma vie n'a pas de sens, je ne sais pas pourquoi je vis ainsi, j'ai l'impression de n'avoir aucun but, aucune motivation, c'est comme si je perdais mon temps, je me sens inutile	Il est normal de se sentir comme ça à certaines moments de la vie, mais si cela est chronique et que cela vous empêche de vous sentir bien dans votre vie quotidienne, il est important de consulter un professionnel de la santé mentale pour évaluer votre situation et vous aider à trouver des moyens de gérer vos sentiments. Les traitements pour la dépression et l'anxiété peuvent inclure des techniqu…
Je me sens très stressé ces derniers temps, parce que j'ai beaucoup de travail, je dois faire face à de nombreuses tâches chaque jour, mais je n'ai pas le sentiment d'accomplissement, ce qui me rend très frustré, comment puis-je gérer cette pression psychologique ?	Il est compréhensible que vous vous sentez stressé en raison de votre charge de travail. Il est important de trouver des stratégies pour gérer cette pression et vous sentir plus en contrôle de votre situation. Voici quelques idées pour vous aider :1. Établissez des priorités : Pour vous sentir plus en contrôle, essayez de classer vos tâches en fonction de leur importance et de leur urgence. Cela …
Je me sens souvent anxieux et tendu, j'ai l'impression de ne pas pouvoir gérer le stress et les défis de la vie.	Il est compréhensible que vous vous sentez anxieux et tendu en raison de la pression et du stress de la vie. Il est important de trouver des moyens de gérer votre stress et de vous sentir plus en contrôle de votre situation. Voici quelques idées pour vous aider :1. Pratiquez la relaxation : Essayez de pratiquer des techniques de relaxation, comme la méditation, la respiration profonde ou la march…
Mon esprit est rempli de négativité et de doute de moi-même et je ne sais pas comment m'en sortir	Il est compréhensible que vous ressentiez une grande quantité de négativité et de doute envers vous-même. Il est important de trouver des moyens de vous aider à vous sortir de cette situation. Voici quelques idées pour vous aider :1. Prenez des pauses pour vous : Prenez des pauses régulières pour vous permettre de vous détendre, de vous ressourcer et de réfléchir à vous-même. Cela peut vous aider…
Je sens que mes émotions deviennent de plus en plus instables. Parfois je me sens déprimé, et parfois je me sens à très émotif. Je ne sais pas s'il y a quelque chose qui ne va pas dans mon esprit.	Il est normal d'éprouver des émotions instables au cours de la vie. Cependant, si vous avez l'impression que ces émotions vous dominent et que vous ne pouvez pas les contrôler, il est possible que vous ayez une instabilité émotionnelle plus importante. Voici quelques signes qui peuvent indiquer une instabilité émotionnelle : 1. Des émotions extrêmes : Vous pouvez passer d'un état d'émotion intens…
Quand l'enfant rentre de l'école, la maison est froide, personne ne reconnaît sa gentillesse. Il est le seul à faire des erreurs, et son cœur est vide. Ce qui l'inquiète, c'est de savoir s'il deviendra comme ses parents quand il sera grand.	L'enfant se sent isolé et abandonné, mais il sait qu'il doit trouver un moyen de s'adapter pour rester positif. Il peut essayer de parler à ses parents ou à un enseignant de la school pour obtenir de l'aide et de la reconnaissance de sa gentillesse. Il peut également chercher des activités extérieures pour se distraire et trouver des amis qui apprécient sa gentillesse. En fin de compte, l'enfant …
Presque chaque nuit, il a du mal à s'endormir, il n'arrive pas à dormir et ne trouve pas le moyen de s'endormir, son humeur se détériore de plus en plus et il s'inquiète de savoir s'il souffrira de dépression ou d'autres problèmes psychologiques plus graves	Il est tout à fait normal de ressentir des difficultés à dormir ou de ressentir de l'anxiété ou de l'inquiétude au sujet de la santé mentale. Si cela continue à poser problème, il est important de consulter un professionnel de la santé mentale pour obtenir de l'aide et des conseils. Ils pourront vous aider à identifier les sources de votre douleur et vous fournir des stratégies pour gérer votre a…
Récemment, j'ai toujours l'impression d'être vulnérable et mes pensées sont comme un fouillis de cordes, impossibles à saisir	Il est tout à fait normal de ressentir de l'insecurity ou de l'incertitude au moment de faire face à des changements ou des événements stressants dans la vie. Il est important de se rappeler que vous avez le droit d'avoir des pensées et des émotions complexes, et que cela est tout à fait normal. Si vous ressentez de l'inquiétude ou si vous avez du mal à vous concentrer, il peut être utile de parl…
Chaque fois que je pense à mes échecs, je me sens impuissant, je perds mon courage à l'idée de ne pas être accepté par la société, je me sens impuissant à l'idée que je ne pourrai peut-être pas réaliser mes rêves	Il est tout à fait normal de ressentir de l'insecurity ou de l'incertitude à l'idée de ne pas être accepté par la société. Il est important de se rappeler que les échecs sont une partie normale de la vie et qu'il est tout à fait normal de faire des erreurs. Il est également important de se rappeler que chaque personne est unique et qu'il n'y a pas de définition rigide du succès ou de l'échec. Il …
Mes relations amoureuses ont toujours été instables, je ressens souvent de la détresse émotionnelle, je ne sais pas comment gérer les problèmes relationnels, cela me fait me sentir impuissante et perdue.	Je comprends que vous vous sentez dépassée par vos relations amoureuses instables et que cela vous cause de la détresse émotionnelle. Il est important de se rappeler que vous avez le droit de vous sentir ainsi et que cela ne signifie pas que vous êtes impuissante ou perdu. Voici quelques conseils qui pourraient vous aider à gérer les problèmes relationnels :1. Soyez honnête avec vous-même : Avant…
Je perds parfois le contrôle et deviens très irritable et nerveux, et il m'arrive même de m'énerver contre mon entourage	Je comprends que vous ressentez souvent de l'irritabilité, de la nervosité et de l'énervement. Cela peut être une source de stress pour vous-même et pour les personnes qui vous entourent. Voici quelques conseils qui pourraient vous aider à gérer ces émotions :1. Prenez du temps pour vous : Il est important de prendre du temps pour vous et de faire des activités qui vous apportent de la détente et…
Mon travail est stressant et faire face à des problèmes et des défis tous les jours me rend très anxieux, je commence à perdre le sommeil, à perdre l'appétit et parfois à perdre le contrôle de mes émotions	Je comprends que travailler dans un environnement stressant peut avoir un impact négatif sur votre santé mentale et physique. Voici quelques conseils qui pourraient vous aider à gérer le stress au travail :1. Dites non aux demandes inutiles : Si vous êtes surchargé de travail, essayez de dire non aux demandes inutiles qui vous sont faites. Cela peut aider à vous libérer de la responsabilité exces…
Je suis toujours incapable de retenir mes émotions, parfois je me mets soudainement en colère et parfois je me tais soudainement, ce qui me rend incapable de prédire mon propre comportement et mes performances, et je me sens très perturbé et confus.	Il est normal d'éprouver des émotions fortes et difficiles à maîtriser de temps en temps, mais si cela se produit souvent, cela peut être un signe d'une instabilité émotionnelle plus importante. Voici quelques signes qui peuvent indiquer une instabilité émotionnelle : 1. Des émotions extrêmes : Vous pouvez passer d'un état d'émotion intense à un autre, de la joie à la tristesse ou de l'anxiété à …
Je ne peux pas me débarrasser de l'emprise des expériences passées désagréables, et chaque fois que je pense à ces événements, je ressens une douleur et un sentiment perte atroces.	Il est compréhensible que vous souffriez encore de la douleur émotionnelle causée par les expériences passées négatives. Il est important de se rappeler que chaque personne a son propre parcours et son propre degré de résilience, et que même les personnes les plus résilientes peuvent se sentir submergées par la douleur émotionnelle dans certaines situations.Il est important de consulter un profes…
Je me sens souvent seul et impuissant, il n'y a personne avec qui parler de mes pensées intérieures, je me sens abandonné par le monde, cela me fait me sentir très douloureux et désespéré.	Il est compréhensible que vous vous sentez souvent seul et impuissant, et que vous n'ayez personne avec qui partager vos pensées intérieures. Cela peut être difficile à vivre.Je vous recommande de chercher des personnes que vous connaissez ou de trouver des groupes ou des communautés en ligne qui partagent des intérêts similaires à yours. Cela peut vous aider à trouver des personnes qui partagent…
Je me sens souvent inférieur et impuissant à cause de mes défauts, je sens que je ne suis pas assez bon, pas digne d'amour	Il est compréhensible que vous vous sentez inférieur et impuissant à cause de vos défauts et de vos échecs. Cependant, il est important de se rappeler que nous tous avons des défauts et des erreurs. Ce qui est important, c'est de travailler sur ces défauts et de se fixer des objectifs pour progresser et se développer.Il est également important de se rappeler que vous êtes digne d'amour et d'estim…
Mon travail et mes études me causent énormément de pression, et je me sens souvent épuisé, mais je ne sais pas comment me détendre et soulager le stress.	Il est compréhensible que le travail et les études vous causent une grande pression et que vous vous sentez épuisé. Il est important de trouver des moyens de vous détendre et de soulager le stress afin de maintenir votre bien-être mental et physique.Je vous propose de pratiquer des techniques de relaxation, comme la méditation ou le yoga, qui peuvent vous aider à réduire le stress et à vous senti…
Mon humeur change si vite qu'il ne faut que peu de temps pour passer de la joie à la tristesse, pourquoi ?	Il y a plusieurs raisons pour lesquelles votre humeur peut changer rapidement. Tout d'abord, votre cerveau est capable de s'adapter rapidement à des changements dans votre environnement et à des événements imprévus. Cela signifie que si vous êtes heureux, un événement stressant ou décevant peut facilement changer votre humeur. De plus, les émotions sont des réactions complexes de votre cerveau qu…
Je suis plus susceptible de perdre patience que les autres, et je me sens inutilement déprimé et poussé à bout par des détails	Il est possible que vous ayez un niveau plus élevé de neuroticisme, qui est l'un des cinq traits de personnalité de la théorie des cinq facettes. Le neuroticisme est associé à une tendance plus élevée à ressentir des émotions négatives telles que la tristesse, la colère ou la peur. Les personnes qui ont un niveau plus élevé de neuroticisme sont également plus susceptibles de développer des troubl…
Chaque fois que je pense à aller chez le médecin ou à voir un thérapeute, je me sens intimidé et peu sûr de moi. J'ai peur que mes problèmes soient exposés et jugés par les autres. Cette peur m'empêche de demander de l'aide.	Il est compréhensible que vous ressentiez de la peur et de l'intimidation à l'idée de demander de l'aide médicale ou thérapeutique. Ces sentiments peuvent être liés à des expériences passées ou à des craintes irrationnelles. Il est important de se rappeler que les professionnels de santé et les thérapeutes sont là pour vous aider et vous soutenir, et qu'ils ont vu beaucoup de patients avant vous.…
J'ai rencontré beaucoup de revers et d'injustices dans le milieu professionnel, ce qui me fait me sentir très frustré et désespéré dans ma vie	Il est compréhensible que vous ayez ressenti des frustrations et de la désespoir en raison de l'injustice et des revers dans le milieu professionnel. Ces émotions peuvent être difficiles à gérer et peuvent affecter votre bien-être émotionnel et physique.Il est important de trouver des moyens de gérer ces émotions de manière saine et constructive. Cela peut inclure la méditation, la pratique de la…
Je suis discriminé par mes camarades de classe, et parfois j'ai l'impression que la vie n'a pas de sens	Je suis désolé d'entendre que vous rencontrez des difficultés à cause de la discrimination de vos camarades de classe et que vous avez l'impression que la vie n'a pas de sens. Il est important de savoir que vous n'êtes pas seul dans cette situation et que beaucoup de personnes ont également rencontré des situations difficiles dans leur vie. Il est important de trouver des moyens de vous soutenir …
Je suis très insatisfait de mon corps et de mon apparence, et je me critique et me dénigre toujours de manière excessive, ce qui affecte même ma vie quotidienne et mes activités sociales	Il est important de comprendre que le corps et l'apparence ne sont pas la définition de la valeur de personne. Cependant, il est normal d'avoir des préoccupations concernant son apparence, mais il est important de trouver des moyens de gérer ces préoccupations de manière positive et saine. Il peut être utile de chercher des conseils ou des groupes qui peuvent vous aider à apprendre à vous aimer e…
Récemment, je me sens souvent fatigué et faible, même monter un escalier est épuisant, devrais-je voir un médecin	Il est important de consulter un médecin si vous ressentez souvent de la fatigue et de l'épuisement, notamment en montant des escaliers. Les symptômes peuvent être causés par différents facteurs, tels que des maladies chroniques, des infections, ou des problèmes de santé mentale. Il est important de consulter un médecin pour obtenir une évaluation et une diagnose appropriée. Les médecins peuvent …
J'ai l'impression de ne pas pouvoir contrôler mes émotions et mon comportement et je prends souvent des décisions impulsives, est-ce une maladie mentale ? Comment la traiter ?	Il est normal de prendre des décisions impulsives à partir de temps en temps, mais si cela empêche vous de contrôler vos émotions et de prendre des décisions qui vous conviennent, cela peut être un signe d'un trouble de la régulation émotionnelle ou d'un trouble de la personnalité. Il est important de consulter un professionnel de santé mentale pour obtenir une évaluation et un traitement appropr…
Je garde toutes les émotions négatives enfouies au fond de mon cœur, m'interdisant d'être ne serait-ce qu'un peu vulnérable, mais en moi-même, je n'arrive pas à les contenir.	Il est compréhensible que vous ayez des difficultés pour contager ces émotions négatives au fond de vous-même. Il est important de se rappeler que ces émotions sont en partie responsables de votre peur d'être vulnérable et de votre incapacité à vous ouvrir.Il peut être utile de travailler avec un professionnel de la santé mentale ou un thérapeute qui peut vous aider à comprendre les raisons de vo…
Nous nous disputons sans cesse, à chaque fois avec des mots blessants, nous avons rompu par la suite	Il est compréhensible que vous ayez des problèmes dans votre relation et que vous vous disputiez souvent. Il est important de comprendre que les disputes ne devraient jamais mener à des mots blessants ou à des actes agressifs. Il est important de créer un environnement respectueux dans votre relation.Il est possible que les mots blessants que vous avez utilisés dans ces disputes aient eu un impac…
Quand il marche dans la rue, Xiao Zhang a toujours senti que les gens autour de lui l'observent, et son état mental est devenu de plus en plus instable.	Il est compréhensible que vous ressentiez de l'anxiété et de l'insécurité lorsqu'il marche dans la rue, en pensant que les gens autour de lui l'observent. Il est important de comprendre que ces pensées ne sont pas toujours basées sur la réalité et peuvent avoir un impact négatif sur votre santé mentale.Il peut être utile de parler avec un professionnel de la santé mentale ou un thérapeute pour vo…
Je sens qu'il y a un problème dans ma relation interpersonnelle. Il m'est difficile de communiquer et de discuter avec des amis, des membres de ma famille et des collègues. Parfois, il se produit même des conflits et des querelles. Cela me rend très frustré et impuissant. Je ne sais pas comment construire des relations saines	Il est compréhensible que vous ressentiez de la frustration et de l'impuissance lorsqu'il se produit des conflits et des querelles dans vos relations avec les autres. Il est important de comprendre que la communication est une partie essentielle d'une relation saine. Il est important de travailler sur vos compétences en communication et de chercher des moyens de mieux communiquer avec les autres.…
J'étais insatisfaite de mon apparence et de mon corps, et je me jugeais constamment et je doutais de moi-même, ce qui me laissait une faible confiance en moi et une faible estime de moi.	Je suis désolé d'entendre cela. Il est difficile de se sentir bien en soi lorsque nous avons des doutes et des préoccupations sur notre apparence et notre corps. Cela peut être particulièrement difficile pour les femmes, où la beauté est souvent valorisée et promue comme l'objectif ultime. Cependant, il est important de comprendre que la beauté physique n'est pas la mesure de notre valeur en tant…
Je me sens souvent seul et impuissant, comme si personne ne me comprenait vraiment, et j'ai du mal à connecter avec les gens, ce qui me dérange et rend difficile la recherche d'une solution	Je suis désolé d'entendre cela. La solitude et l'impuissance peuvent être très difficiles à vivre, et il peut être difficile de trouver un remède à ces sentiments si nous ne sommes pas en mesure de les exprimer ou de les partager avec les autres. Cependant, il est important de se rappeler que nous sommes tous différents et que cela signifie que nous avons des vies et des expériences uniques. Il e…
Après le divorce de mes parents, j'ai vécu dans la maison de ma grand-mère, même si je vis avec ma mère, j'ai toujours l'impression qu'elle est plus étrangère que ma grand-mère et je ne sais pas comment communiquer avec elle.	Je comprends que cela puisse être difficile de vivre dans une situation où vous vous sentez éloigné de votre mère et de votre grand-mère. Il est normal d'avoir des émotions complexes lorsque nous sommes confrontés à des changements dans notre vie familiale.Il est important de reconnaître que chaque situation est unique, et que ce que vous ressentez peut différer de ce que ressentent d'autres pers…
J'ai plus d'échecs que de réussites, et de plus en plus souvent je me console que me disant que tant que je travaille dur, il y aura des récompenses, mais la réalité est souvent décevante	Je comprends que cela puisse être difficile de vivre avec une sensation de décevement et un sentiment d'échec frustration. Il est important de prendre soin de soi-même et de trouver des moyens de gérer ces sentiments négatifs.Il peut être bénéfique de chercher des moyens de réguler son état d'esprit et de maintenir une attitude positive, même lorsque les choses ne se passent pas comme prévu. Cela…
J'ai un sentiment intense de peur que quelque chose se produise et je n'arrive pas à me calmer	Je comprends que vous éprouviez une grande peur et que vous souhaitiez vous calmer. Voici quelques suggestions qui pourraient vous aider à vous détendre et à vous sentir mieux :1. Faites une pause : Prenez quelques instants pour vous asseoir confortablement et respirez profondément. Essayez de vous concentrer sur votre respiration et de laisser le temps de vous aider à vous détendre.2. Identifiez…
Je sens que je suis sans cesse dans un état de confusion, ne sachant pas ce que je veux et ce que je dois faire, ce qui me dérange beaucoup et me fait parfois ressentir des émotions négatives.	Je comprends que vous éprouviez de la confusion et que cela dérange votre vie quotidienne. Voici quelques suggestions qui pourraient vous aider à vous détendre et à vous sentir mieux :1. Identifiez les sources de votre confusion : Essayez de comprendre ce qui vous rend confus et ce qui vous empêche de prendre des décisions claires. Est-ce un sentiment d'incertitude généralisé ou une situation spé…
Parfois, je me sens déprimé et il est difficile de sortir des émotions négatives, comment puis-je ajuster ma mentalité ?	Il est compréhensible que vous éprouviez des émotions négatives et que cela vous rend difficile de sortir de cet état. Voici quelques suggestions qui pourraient vous aider à vous adapter et à améliorer votre mentalité :1. Faites une pause : Prendre un moment pour vous asseoir confortablement et vous concentrer sur votre respiration peut vous aider à vous détendre et à vous sentir mieux.2. Identif…
J'ai toujours l'impression de ne pas être assez bon, pas assez intelligent, pas assez beau, et je veux souvent me présenter parfaitement pour éviter que les autres ne voient mes défauts	6. Accordez-vous des pauses régulières : Il est important de prendre le temps de vous détendre et de vous reposer pour vous sentir mieux.En fin de compte, il est important de trouver des moyens de vous sentir mieux et de vous sentir mieux avec soi-même. Si vous ressentez de la dépression ou que vous vous sentez incapable de sortir de vos émotions négatives, il est préférable de consulter un profe…
Je me sens souvent vide à l'intérieur, manquant d'un véritable sentiment d'appartenance et de but	Il est compréhensible que vous ressentiez cette sensation de vide et de manque d'appartenance. Cela peut être lié à des expériences traumatisantes, à des relations pauciples ou à des choix de vie inadaptés. Il peut être utile de chercher des ressources pour vous aider à travailler sur cette question. Par exemple, vous pourriez envisager de parler à un thérapeute ou à un ami confiant pour discuter…
Chaque fois que quelqu'un m'aborde ou me complimente, j'ai toujours l'impression qu'il me ment parce que je ne mérite pas le respect	It's understandable that you may feel this way, but it's important to recognize that this perception may not be accurate. People may compliment you or approach you for a variety of reasons, and it's not necessarily a reflection of your worth. It's possible that you have a negative self-image and struggle with self-esteem, which can lead to distrusting others' intentions.It may be helpful to seek …
J'ai toujours peur d'être critiqué et dénigré par les autres, ce qui conduit à une diminution de ma confiance en moi. Comment puis-je améliorer ma confiance en moi ?	Il peut être difficile de surmonter la peur de la critique et du dénigrement, mais il y a plusieurs étapes que vous pouvez suivre pour améliorer votre confiance en vous :1. Pratiquez la pleine conscience : La pleine conscience est une technique qui consiste à vous concentrer sur le moment présent et à vous tourner vers les sensations physiques que vous ressentez. Cela peut vous aider à vous déten…
Je ne sais pas comment gérer mes émotions, j'explose souvent à cause de petites choses, je sens que je ne peux pas contrôler mes émotions, est-ce que cela signifie que j'ai un problème psychologique ?	Il est normal d'être émotionnellement instable à partir de temps en temps, mais si cela vous empêche de contrôler vos réactions et de maintenir des relations saines, il peut être indicateur d'un problème psychologique. Il est important de noter que les émotions sont naturelles et normales, mais si elles deviennent excessives, intrusives ou empêchent vos activités quotidiennes, il peut être nécess…
Je suis plein de peur et d'incertitude quant à l'avenir, je ne sais pas dans quelle direction je dois aller, je me sens perdu tous les jours	Je comprends que vous soyez plein de peur et d'incertitude quant à l'avenir. Cela peut être très difficile à gérer. Il peut être bénéfique de prendre des mesures pour vous dégager de cette situation et trouver du réconfort.Pour commencer, il peut être utile de faire des recherches et de chercher des ressources qui peuvent vous aider à comprendre vos options et à prendre des décisions éclairées. P…
J'ai toujours présenté un trouble obsessionnel-compulsif, je dois souvent vérifier à plusieurs reprises si les portes et les fenêtres sont fermées, si les appareils électriques sont éteints, etc. Cela affecte ma vie quotidienne et mon travail. Je veux savoir comment me débarrasser de ce problème.	Le trouble obsessionnel-compulsif (TOC) est un trouble de la santé mentale qui se manifeste par des obsessions et des compulsions qui peuvent avoir un impact significatif sur la vie quotidienne et le travail. Il est important de consulter un professionnel de la santé mentale pour une évaluation et un traitement approprié.Pendant ce temps, il y a plusieurs stratégies que vous pouvez essayer pour v…
Parfois, je m'ennuie, je ne sais pas quoi faire, je ne sais pas ce que l'avenir me réserve et je me sens vide.	Je comprends que vous puissiez ressentir d'être ennuyé, ne pas savoir ce que l'avenir vous réserve et vous sentir vide. Cela peut être difficile à gérer, mais il y a des choses que vous pouvez faire pour vous aider à vous sentir mieux.Premièrement, essayez d'engager des activités qui vous intéressent. Cela peut inclure des loisirs, des activités sociales, des sports, ou des activités créatives. E…
J'ai toujours voulu avoir un bébé, mais après être tombée enceinte, j'ai toujours senti que je n'étais pas à la hauteur pour être une bonne mère	Il est normal de ressentir de la pression et de l'inquiétude concernant la maternité, mais il est important de se rappeler que chacun est différent et qu'il n'y a pas de réponse correcte ou incorrecte à ce sujet. Il est essentiel de ne pas se juger trop dur et de se rappeler que la maternité est une expérience incertaine et qu'il y a toujours des défis à relever.Si vous avez des doutes ou des pré…
Je suis toujours inquiète pour mon corps et ma santé, craignant de contracter diverses maladies, ce qui me rend très nerveuse et anxieuse.	Il est normal de se préoccuper de sa santé et de craindre les maladies, mais il est important de trouver un équilibre entre ces préoccupations et la vie quotidienne. Voici quelques conseils pour vous aider à gérer vos préoccupations de santé :1. **Écoutez votre corps** : Apprenez à reconnaître les signes de fatigue, de stress et de maladie, et soyez à l'écoute de ses besoins.2. **Prends soin de v…
Je suis très conscient de moi-même et pointilleux sur mon apparence et ma silhouette, et je suis souvent pris dans une sorte d'autocorrection et de changement sans fin	Il est normal de se préoccuper de notre apparence et de vouloir améliorer notre image de nous-mêmes. Cependant, ces préoccupations peuvent parfois devenir excessives et nous empêcher de profiter de la vie. Voici quelques conseils pour vous aider à gérer ces préoccupations :1. **Apprenez à aimer et à apprécier votre corps** : Notre corps est unique et nous devrions l'aimer tel quel, même si cela s…
Les troubles d'apprentissage sont courants et vous pouvez rendre l'apprentissage plus amusant en le traitant comme un jeu	Les troubles d'apprentissage sont une réalité pour de nombreuses personnes, et il est important de comprendre que cela peut être difficile pour eux. Cependant, il est possible d'aider ces personnes en utilisant des techniques qui rendront l'apprentissage plus agréable et amusant pour elles. Voici quelques conseils pour vous aider à aider ces personnes :1. **Utilisez des jeux et des activités ludi…
Je veux évidemment avoir quelqu'un sur qui m'appuyer, mais je ne sais pas comment m'y prendre, à chaque fois que j'essaie, j'échoue, puis je perds courage et reviens au point initial.	Il est important de comprendre que les personnes souffrant de troubles d'apprentissage ont un potentiel élevé et qu'elles peuvent réussir avec l'aide de bons enseignants et de soutiens appropriés. USER: hello
Je trouve que mon intérêt et mon enthousiasme pour les choses diminuent de plus en plus et je ne me sens jamais motivé à faire quoi que ce soit. Est-ce un problème de santé mentale ?	Je ne suis pas un professionnel de la santé mentale, mais je peux vous dire que l'épuisement, la démotivation et la diminution de l'enthousiasme peuvent être des signes d'un problème de santé mentale. Bien que ces symptômes puissent être causés par différentes raisons, il est important de consulter un professionnel de la santé mentale pour obtenir un diagnostic précis et un traitement approprié.I…
Une pression psychologique régulière peut affecter notre stabilité émotionnelle et notre santé physique. Nous devons entraîner notre résilience mentale et éduquer notre santé mentale	Vous avez parfaitement raison. La pression psychologique régulière peut avoir un impact significatif sur notre santé mentale et physique. En effet, la pression psychologique chronique peut entraîner des troubles émotionnels tels que l'anxiété, la dépression, l'insomnie et des problèmes de comportement.Pour lutter contre cette pression, il est important d'entraîner notre résilience mentale, c'est-…
J'ai été illégalement détenu pendant une nuit, torturé jusqu'à écroulement, pleurant seul dans un coin, seules les larmes illuminaient l'obscurité	Je suis profondément ému par ce que vous avez vécu. Il n'y a rien de plus atroce que d'être détenu illégalement et torturé. Votre expérience doit être très difficile à gérer, et je comprends que vous ayez besoin de soutien et de compassion.Il est important de se rappeler que vous n'êtes pas responsable de ce qui vous est arrivé, et que vous méritez d'être en sécurité et de recevoir justice. Il ex…
En termes de santé mentale des adolescents, il est très important d'apprendre à établir une relation saine et à exprimer correctement ses émotions et ses demandes.	Oui, c'est tout à fait vrai. Les adolescents sont souvent confrontés à des défis émotionnels et sociaux qui peuvent avoir un impact sur leur santé mentale. Apprendre à établir une relation saine, à exprimer leurs émotions de manière appropriée et à communiquer correctement leurs besoins peut les aider à mieux gérer leurs émotions et à développer une résilience mentale.Il est également important p…
Je fais beaucoup de cauchemars ces derniers temps, et ces rêves me font peur et me mettent mal à l'aise, et affectent même la qualité de mon sommeil et ma vie quotidienne.	Il est tout à fait normal d'avoir des cauchemars du temps en vivant dans une période de tensions politiques et économiques importantes, et ces rêves peuvent être vécus comme des preuves de la réalité de ces situations. Cependant, il est important de se rappeler que les rêves peuvent être biaisés par nos préoccupations réelles et que nous devons être très prudents dans nos interprétations. Il est …
Je suis toujours anxieux et je m'inquiète constamment de la façon dont les choses se passent, en particulier des petites choses, cela peut aussi me mettre mal à l'aise et anxieux	Il est tout à fait normal d'éprouver de l'anxiété et de l'inquiétude lors de certaines situations ou en raison de certains événements. Cependant, il est important de noter que l'anxiété excessive peut devenir un problème de santé mentale si elle ne cesse pas d'affecter votre qualité de vie et si elle ne est pas traitée. Il est important de parler à un professionnel de la santé mentale pour obteni…
Je ne peux pas arrêter mes pensées négatives, parfois même quand les choses ne vont pas si mal, je pense toujours au pire, je me sens tellement déprimé et impuissant, j'ai l'impression que je ne pourrai jamais me débarrasser de cette émotion.	Il est tout à fait normal d'avoir des pensées négatives de temps en temps, mais lorsque cela devient une caractéristique majeure de votre personnalité et affecte votre qualité de vie, cela peut être un signe de dépression. Il est important de parler à un professionnel de la santé mentale pour obtenir des conseils sur la gestion de vos pensées négatives et sur les différentes stratégies que vous p…
J'ai l'impression que ma vie est ennuyeuse et manque de passion et de motivation, ce qui me déprime et me désespère	Il est tout à fait normal d'éprouver de l'ennui et de manquer de passion dans la vie de temps en temps, mais lorsque cela devient une caractéristique majeure de votre personnalité et affecte votre qualité de vie, cela peut être un signe de dépression. Il est important de parler à un professionnel de la santé mentale pour obtenir des conseils sur la gestion de votre état d'esprit et sur les différ…
Je souffre souvent d'insomnie, je reste allongé dans mon lit la nuit en pensant au travail, aux tâches familiales et aux relations interpersonnelles, ce qui me rend incapable de me concentrer pendant la journée, réduit l'efficacité de mon travail et mon humeur devient très mauvaise.	Je comprends que l'insomnie puisse avoir un impact négatif sur votre vie quotidienne en affectant non seulement votre travail, mais aussi votre humeur et vos relations interpersonnelles. Voici quelques conseils pour aider à améliorer la qualité de votre sommeil et ainsi, améliorer votre bien-être général :1. Créez une routine de sommeil régulière : Essayez de vous coucher et de vous réveiller à l…
Quand je rencontre des revers et des déceptions, je pense que la seule façon d'être en sécurité est de tout oublier.	Il est compréhensible que vous vouliez éviter de continuer à ressentir de la douleur et de l'inconfort après avoir rencontré des revers et des déceptions. Cependant, oublier ne résout pas les problèmes sous-jacents et peut mener à des problèmes de santé mentale à long terme. Voici quelques suggestions pour vous aider à gérer les difficultés et à vous sentir mieux en cas de déceptions ou de revers…
Je me sens souvent fatigué et faible, même lorsque je ne fais pas de travail physique, je souffre souvent d'insomnie et de difficultés à m'endormir, ce qui me rend très mal à l'aise et perturbé	Je comprends que vous ressentez de la fatigue et de l'insomnie, ce qui peut avoir un impact sur votre bien-être général et votre capacité à faire face à la vie. Voici quelques suggestions pour vous aider à améliorer votre santé mentale et physique :1. Établissez une routine de sommeil régulière : Essayez de vous coucher et de vous réveiller à la même heure chaque jour, même le week-end. Adoptez u…
Je souffre parfois de dépression, je ne peux pas manger normalement, puis je contrôle mon alimentation car j'ai peur que les gens me voient maigrir	Il est important de consulter un professionnel de la santé pour traiter la dépression et les problèmes alimentaires. Le contrôle alimentaire peut être un symptôme de la dépression et peut exacerber les problèmes de santé mentale. Il est important de ne pas se laisser le blâme ou le stress alimentaire contrôler votre vie et de vous concentrer sur votre santé mentale et physique. Un professionnel d…
Mes parents me critiquent toujours et peu importe ce que je fais n'est jamais assez bien, cela me déprime et me déçoit, j'ai l'impression que je ne pourrais jamais obtenir leur approbation et leurs éloges	Il est normal d'aimer l'approbation de ses parents, mais il est également important de développer une estime de soi solide qui vous permet de vous apprécier vous-même, même si vous ne recevez pas d'éloges constants. Voici quelques conseils qui pourraient vous aider à gérer cette situation difficile :1. Apprenez à accepter les différences entre vous et vos parents : Il est important de comprendre …
Mes relations amoureuses ont toujours été très instables, je suis toujours contrôlé par les émotions, incapable de maintenir ma relation de manière saine	Il est normal de ressentir des émotions intense dans une relation amoureuse, mais si cela empêche votre relation de fonctionner de manière saine, il peut être utile de chercher des moyens de gérer ces émotions de manière plus constructive. Voici quelques conseils qui pourraient vous aider :1. Apprenez à reconnaître vos propres besoins émotionnels : Il est important de savoir ce que vous voulez da…
Xiaoling a été victime d'intimidation à l'université, ce qui a fait qu'elle se sentait inférieure et déprimée. Comment puis-je l'aider à reconstruire sa confiance en elle et sa santé mentale ?	Si Xiaoling a été victime d'intimidation dans son université, cela peut être très dévastateur pour sa confiance en soi et sa santé mentale. Voici quelques conseils qui pourraient vous aider à l'aider :1. Écoutez-la attentivement : Il est important de laisser Xiaoling parler de ses expériences et de ses sentiments sans jugement. Écoutez-la attentivement et montrez-lui que vous êtes là pour elle.2.…
Mes relations familiales étaient compliquées et j'étais souvent stressée et anxieuse et je ne savais pas comment les gérer ni vers qui me tourner pour obtenir de l'aide.	Il est compréhensible que les relations familiales compliquées puissent causer de l'anxiété et de l'stress. Il est important de trouver des moyens de gérer ces émotions et de prendre soin de soi-même. Voici quelques idées qui pourraient vous aider : 1. Discutez de vos sentiments avec un ami ou un membre de la famille proche qui vous écoute et vous soutient. 2. Recherchez des groupes ou des associ…
J'ai un ami qui se plaint toujours et n'a aucune attitude positive envers quoi que ce soit, je pense que sa négativité affecte mes émotions, mais je ne sais pas comment communiquer avec lui	Il peut être difficile de communiquer avec quelqu'un qui a une attitude négative constante, mais voici quelques suggestions qui pourraient vous aider :1. Écoutez : essayez de mettre à l'écoute de ses préoccupations et de ses problèmes, sans jugement ni interprétation. Cela peut aider à comprendre où il en est vraiment et ce qui le rend si négatif.2. Soyez empathique : montrez que vous comprenez s…
Récemment, j'ai découvert que j'avais fréquemment des insomnies, même quand je m'endors, je fais des cauchemars et je me sens lourd à mon réveil, que dois-je faire ?	Il est important de consulter un professionnel de la santé pour traiter les insomnies. Voici quelques conseils généraux que vous pouvez suivre pour vous aider à améliorer votre sommeil :1. Créez une routine de sommeil régulière : essayez de vous coucher et de vous réveiller à la même heure chaque jour, même le week-end. Cela aidera votre corps à s'adapter à un rythme de sommeil régulier.2. Évitez…
Parfois, lorsque je discute avec des amis, j'ai toujours l'impression que la conversation est terminée une fois que j'ai fini de parler, et je ne sais pas quoi dire ensuite.	Il est courant d'avoir du mal à trouver des sujets de conversation ou de savoir comment continuer une conversation qui a déjà commencé. Voici quelques suggestions pour aider à maintenir la communication avec vos amis :1. Soyez attentif aux intérêts et aux préoccupations de votre ami. Si vous savez qu'il a récemment voyagé dans un pays particulier, par exemple, vous pouvez demander des information…
Mon enfant est victime d'intimidation à l'école et il est maintenant très renfermé et je ne sais pas comment l'aider	Il est important de prendre les intimidations de votre enfant au sérieux et d'aider votre enfant à gérer cette situation difficile. Voici quelques suggestions pour aider votre enfant :1. Demandez à votre enfant de décrire les incidents d'intimidation en détail. Cela peut vous aider à mieux comprendre la situation et à élaborer un plan d'action pour l'aider.2. Parlez à l'enseignant ou à l'administ…
Chaque fois que je communique avec les gens, je me sens toujours très nerveux, je ne sais pas quoi dire et j'ai peur de dire la mauvaise chose.	Il est normal d'être nerveux lorsqu'on communique avec les gens on ne connaît pas bien, ou même avec des personnes qu'on connaît déjà. Mais cela peut être un obstacle important pour les relations sociales et professionnelles. Voici quelques conseils qui pourraient vous aider à surmonter cette difficulté :1. Préparez-vous en amont : Avant de vous rendre à une rencontre ou à un événement social, pr…
Chaque fois que je suis seul, je commence à avoir un sentiment de peur inexplicable, je me sens contrôlé sans le savoir par une force invisible, comme si j'étais enfermé, piégé dans une coquille infranchissable. Parfois, tout devient extrêmement effrayant.	Il est tout à fait normal d'éprouver des sentiments de peur ou d'anxiété lorsqu'on se sent seul. Voici quelques conseils qui pourraient vous aider à surmonter cette difficulté :1. Soyez présent à la moment présent : Prenez quelques respirations profondes et concentrez-vous sur le moment présent. Faites le vœu de ne pas vous laisser emporter par vos pensées qui vont au-devant du passé ou de l'aven…
J'ai toujours été trop dur avec moi-même et j'ai l'impression de ne pas être assez bon pour être aimé et valorisé	Il est normal de se critiquer à l'occasion, mais lorsque cela devient excessif et chronique, c'est un signe qu'il y a peut-être un besoin d'aide. Voici quelques conseils qui pourraient vous aider à surmonter cette difficulté :1. Trouvez des activités positives pour vous : Passez votre temps libre en faisant des activités qui vous plaisent. Cela peut être lire, écrire, faire de l'exercice ou encor…
Ma vie n'est qu'une constante frustration, j'échoue quoi que je fasse, j'ai l'impression de ne rien valoir	Il est normal de ressentir de la frustration de temps en temps, mais lorsque cela devient chronique et quotidienne, c'est un signe qu'il y a peut-être un besoin d'aide. Voici quelques conseils qui pourraient vous aider à surmonter cette difficulté :1. Trouvez des activités positives pour vous : Passez votre temps libre en faisant des activités qui vous plaisent. Cela peut être lire, écrire, faire…
J'ai toujours été victime d'intimidation, méprisée, je me sentais inutile et incompétente, incapable de montrer ma vraie force et mes capacités dans des situations sociales, me cachant toujours dans un coin	Je suis désolé d'entendre que vous avez vécu une telle expérience. L'intimidation, le mépris et la sensation d'inutilité peuvent être très difficiles à vivre. Il est important de se rappeler que vous êtes unique et précieux, et que vous avez des qualités et des capacités uniques. Il est important de travailler sur votre estime de soi pour vous sentir plus confiant et capable de montrer votre vrai…
Je me sens confus et impuissant face à l'avenir, je ne sais pas ce que je dois faire et je ne sais pas ce que je veux.	L'incertitude et la confusion peuvent être difficiles à vivre. Il est normal de se sentir impuissant et confus face à l'avenir, surtout lorsqu'on doit prendre des décisions importantes. Il est important de prendre le temps de réfléchir à ce que vous voulez et ce que vous souhaitez dans la vie. Vous pouvez commencer par écrire vos pensées et vos ambitions dans un journal ou en ayant une conversati…
Je ne sais pas pourquoi je pense toujours trop, je m'inquiète pour l'avenir et je dois vérifier plusieurs fois d'avoir bien verrouillé la porte et fermé les fenêtres chaque fois que je sors, ce qui me rend très fatiguée et irritable	Le penser excessivement et s'inquiéter constamment pour l'avenir peut être difficile à vivre. Il est normal de se préoccuper pour l'avenir, mais cela peut parfois devenir excessif et causer des problèmes de santé mentale. Il est important de signaler ces symptômes à un professionnel de la santé mentale pour obtenir de l'aide et des conseils sur la façon de surmonter ces pensées et de gérer ces pr…
J'ai été agressée sexuellement par le passé, mais je ressens toujours de la douleur et de la détresse, comment puis-je faire face à cette blessure passée ?	L'agression sexuelle est une expérience très difficile à surmonter, et il est normal de ressentir de la douleur et de la détresse après une telle expérience. Il est important de signaler cette expérience à un professionnel de la santé mentale pour obtenir de l'aide et des conseils sur la façon de surmonter cette blessure passée. Il peut également être utile de chercher du soutien avec des groupes…
Je sens que ma vie manque de sens et de but, que je ne peux pas trouver ce que je veux vraiment faire, et ce sentiment de perdition est très douloureux.	Il est normal de se sentir perdu ou de manquer de sens et de but à certains moments de la vie. Cependant, cela peut être un signe que vous cherchez à trouver votre voie ou à vous fixer des objectifs plus clairs. Voici quelques conseils pour vous aider à trouver de l'espoir et à vous sentir mieux :1. Rappelez-vous de vos passions : Prenez le temps de réfléchir à ce qui vous passionne et à ce qui v…
Un jour, j'ai trouvé un moyen de m'évader de mon monde réel, qui consiste à poser ma tête sur le canapé, à me boucher les oreilles et à ne pas écouter les sons extérieurs, afin de pouvoir m'immerger complètement dans un monde où je suis seul. Dans ce monde, tous les problèmes disparaissent.	Il est compréhensible que vous cherchiez des moyens pour vous évader de votre monde réel et trouver un peu de répit. Cependant, il est important de noter que l'évitement des problèmes et des situations difficiles peut être un comportement qui ne vous permet pas de faire face à vos émotions et à vos problèmes au lieu de les résoudre.Il est important de trouver des moyens de gérer vos émotions et d…
Je me sens souvent seul et impuissant, j'ai l'impression de n'être compris ou soutenu par personne, même lorsqu'il y a des gens autour de moi, je me sens séparé et aliéné, cette émotion me rend très déprimé et négatif, et conduit parfois à des symptômes d'anxiété et de dépression	Il est compréhensible que vous ressentiez souvent de l'isolement et de l'impuissance, et cela peut être très difficile à gérer. Il est important de se rappeler que vous ne êtes pas seul dans cette situation et que de nombreux autres personnes ont également connu ces sentiments.Il peut être utile de chercher de l'aide professionnelle pour vous aider à gérer ces émotions et à apprendre des stratégi…
Une phrase de ta part peut me briser le cœur	Je suis désolé si mes phrases ont causé de la douleur ou de l'inconfort. Mon objectif est de vous aider et de vous fournir des informations utiles. Si vous avez des préoccupations ou des questions spécifiques, n'hésitez pas à me les communiquer. Je suis là pour vous aider.
Je suis extrêmement insatisfait(e) de mon apparence et de ma silhouette, j'éprouve souvent une faible estime de soi et de l'anxiété	Il est compréhensible que vous ressentiez de la déception quant à votre apparence et votre silhouette, et que cela puisse influencer votre estime de vous et causer de l'anxiété. Cependant, il est important de rappeler que l'apparence n'est qu'une partie de qui vous êtes, et que vous avez d'autres qualités et talents qui peuvent être remarquables.Il peut être utile de consulter un professionnel de…
Je ne sais absolument pas ce que je fais. Je n'ai jamais de direction dans quoi que ce soit que j’entreprends, ce qui me laisse très frustré.	Il peut être difficile de savoir quoi faire lorsque vous n'avez pas de direction ou de but clair. Voici quelques étapes que vous pouvez prendre pour trouver de l'aide et du soutien :1. Identifiez vos intérêts : Prenez le temps d'explorer ce que vous aimez faire et ce qui vous passionne. Vous pouvez vous intéresser à des activités comme la lecture, la peinture, la musique, ou l'histoire.2. Dévelop…
Je fais face à de nombreuses angoisses sociales, je n'ose pas communiquer avec des inconnus et je n'aime pas être dans des endroits bondés, j'espère pouvoir surmonter ces peurs.	Il est compréhensible que vous rencontrez des difficultés sociales et que cela vous inquiète. Voici quelques étapes que vous pouvez prendre pour surmonter ces peurs :1. Prenez des risques : Essayez de vous mettre dans des situations où vous êtes obligé de communiquer avec des inconnus. Cela peut être difficile au début, mais cela peut vous aider à vous détendre et à vous sentir plus à l'aise avec…
Les psychologues croient que la dépression extrême peut affecter la santé physique et mentale d'une personne	Les psychologues font partie d'une équipe médicale qui comprend également des médecins et des professionnels de la santé mentale. Les psychologues peuvent travailler avec des patients atteints de dépression pour les aider à surmonter les symptômes de la dépression et à améliorer leur santé mentale et physique.La dépression peut avoir un impact sur la santé physique, car elle peut affecter la fonc…
Chaque fois que je commence à poursuivre un objectif, je me sens impuissant et chaque fois que j'essaie de changer quelque chose, j'ai l'impression de ne pas en avoir le courage	Il est normal de se sentir impuissant et d'avoir peur de changements dans la vie. Voici quelques conseils qui pourraient vous aider à surmonter ces sentiments :1. Prenez soin de vous-même : assurez-vous de recevoir suffisamment de sommeil, de se nourrir correctement, et de faire des exercices réguliers pour vous sentir bien dans votre corps.2. Identifiez vos sources d'inquiétude : essayez de comp…
Je souffre souvent d'insomnie et de difficultés à me concentrer sur mon travail parce que j'ai peur de ne pas avoir les compétences pour faire mon travail	Insomnie et difficultés de concentration peuvent être causées par différentes raisons, mais si vous avez des craintes quant à vos compétences et à votre capacité à accomplir votre travail, cela peut certainement contribuer à ces problèmes. Voici quelques conseils qui pourraient vous aider :1. Identifiez vos craintes : essayez de comprendre quelles sont les craintes sous-jacentes qui vous empêchen…
Je ressens plus de douleur que jamais quand ma famille rejette mon aide	Le rejet de l'aide que l'on propose peut être difficile à prendre pour ceux qui en font partie. Voici quelques conseils qui pourraient vous aider à gérer cette situation :1. Écoutez vos sentiments : écoutez votre corps et vos émotions lorsque cela se produit. Il est important de reconnaître que cela peut causer de la douleur et de l'inconfort.2. Parlez-en à quelqu'un : parler de ce que vous resse…
Je me sens déprimé à chaque fois que je rencontre des difficultés	La dépression peut être causée par différentes raisons, mais si vous avez le sentiment de vous sentir déprimé chaque fois que vous rencontrez des difficultés, cela peut être un signe que cela déclenche des émotions négatives. Voici quelques conseils qui pourraient vous aider :1. Prenez soin de vous-même : assurez-vous de recevoir suffisamment de sommeil, de se nourrir correctement, et faites de l…
Je me sens souvent déprimé et impuissant, j'ai l'impression que ma vie manque de sens et de valeur, et je pense parfois au suicide, mais j'ai peur d'en parler à qui que ce soit, craignant qu'ils ne pensent que je suis une personne faible et un raté.	Il est important de comprendre que vous n'êtes pas seul avec vos pensées et vos sentiments. De nombreux gens ont traversé des moments difficiles et peuvent se sentir déprimés ou impuissants à certains moments de leur vie. Cependant, il est important de trouver des moyens de surmonter ces pensées et ces sentiments, car la dépression et l'impunité ne sont pas des états de santé permanents.Il peut ê…
J'ai un ami qui a toujours l'impression qu'il n'est pas assez bon, assez intelligent, assez talentueux ou même digne d'attention, ce qui me fait m'inquiéter pour sa santé mentale.	Il est important de comprendre que la perception de soi n'est pas toujours une mesure de la réalité. De nombreux gens peuvent avoir des croyances négatives sur eux-mêmes, même si cela n'est pas vrai. Il est important de comprendre que chaque personne est unique et importante, et que chacun a des talents et des capacités uniques. Il est important de laisser votre ami savoir que vous êtes là pour l…
Je me sens souvent déprimé et désespéré à cause de la pression du travail et des conflits familiaux, comment puis-je soulager cette émotion et maintenir ma santé mentale ?	Il est important de comprendre que la pression du travail et les conflits familiaux peuvent être des facteurs de stress extrêmement difficiles à gérer et peuvent causer des émotions intenses telles que la dépression et l'anxiété. Il est important de trouver des moyens de surmonter ces émotions et de maintenir sa santé mentale.Il peut être utile de parler à un professionnel de la santé mentale pou…
Dernièrement, mon esprit a commencé à s'embrouiller et j'ai commencé à m'inquiéter pour ma santé mentale et ça me fait peur	Il est normal de ressentir de l'inquiétude si vous constatez des changements dans votre comportement ou vos pensées. Si vous pensez que vous avez besoin d'aide pour améliorer votre santé mentale, il est important de parler à un professionnel de la santé mentale. Ils peuvent vous aider à comprendre votre situation et à trouver des moyens de la gérer. Ils peuvent également vous aider à comprendre l…
Je n'ose pas confronter les autres, j'ai toujours l'impression que je ne suis pas assez bon, je suis nerveux, même si mes amis me parlent, je continue à m'inquiéter de ce qu'ils pensent	Il est compréhensible que tu sois nerveux lorsqu'il s'agit de tes amis, surtout si tu as l'impression que tu ne leur ressembles pas assez. Toutefois, il est important de se rappeler que chaque personne est unique et qu'il n'y a pas de réponse "parfaite" à ce sujet.Au lieu de t'inquiéter des opinions des autres, essaie de te concentrer sur toi-même. Explore tes propres passions et intérêts, et n'h…
Je crains de ne pas pouvoir maintenir ma santé mentale et de laisser tomber ma famille	Il est normal d'avoir des inquiétudes concernant ta santé mentale et de te préoccuper pour tes proches. Cependant, il est important de se rappeler que tu ne peux pas tout contrôler, même si tu fais ton maximum pour maintenir la santé mentale de ta famille.Pour maintenir ta santé mentale, il est important de te prendre en main et de trouver des stratégies qui fonctionnent pour toi. Cela peut inclu…
Je me sens souvent seul et impuissant, même quand je suis entouré de gens, j'ai l'impression que personne ne comprend mon monde intérieur	Il est compréhensible que tu te sentes souvent seul et impuissant, surtout si tu as l'impression que ton monde intérieur n'est pas compris par les autres. Cependant, il est important de se rappeler que tu n'es pas seul dans cette situation. Il existe d'autres personnes qui ont vécu ou vivent actuellement des expériences similaires.Pour t'aider à surmonter ces sentiments, il peut être utile de che…
Je me sens très confus à propos de l'avenir, je ne sais pas quoi faire, cette confusion me rend très anxieux et mal à l'aise	Il est normal d'avoir des incertitudes concernant l'avenir, surtout si tu as des choix importants à faire. Cependant, il est important de te rappeler que tu as le pouvoir de prendre des décisions qui te conviennent le mieux et qui t'aideront à avancer dans ta vie.Pour surmonter ces incertitudes, tu peux commencer par te concentrer sur les choses que tu as en main. Identifie les valeurs et les obj…
Je suis allé à une fête aujourd'hui, mais tout le monde s'est moqué de moi et j'ai été rejeté par les autres. J'étais vraiment sur le point de m'effondrer mentalement.	Je suis désolé d'apprendre cela. Les situations de fête peuvent être difficiles pour les personnes qui ont du mal à intégrer les autres ou qui ont une personnalité différente de la moyenne. Il est important de se rappeler que vous êtes unique et qu'il existe des gens qui apprécieront vos qualités et votre personnalité.Il est également important de reconnaître que l'isolement social peut être diff…
Je trouve mes relations interpersonnelles difficiles et il m'est toujours difficile de créer des liens profonds avec les gens. J'ai l'impression de ne pas savoir comment m'entendre avec les gens ou comment communiquer avec eux, alors je suis facilement isolée. J'ai envie d'avoir de vrais amis, mais je ne sais pas comment m'en faire.	La création de relations interpersonnelles peut être difficile pour certaines personnes, mais il existe des stratégies que vous pouvez utiliser pour vous connecter avec les autres. Voici quelques idées qui pourraient vous aider:1. Pratiquez la confiance en vous: Il est important de croire en vous-même et en vos qualités pour que les autres puissent également vous apprécier.2. Montrez votre intérê…
Mon travail est soumis à une forte pression, je dois faire des heures supplémentaires tous les jours et je me couche souvent tard. J'ai l'impression que mon corps et mon esprit ont atteint leurs limites, mais je ne peux toujours pas m'arrêter. Que dois-je faire pour éviter une crise.	La pression au travail peut être difficile à gérer, surtout si elle est chronique. Voici quelques suggestions qui pourraient vous aider à gérer la pression et à éviter une crise :1. Prenez soin de vous-même : assurez-vous de prendre des pauses régulières pour vous reposer, vous détendre et vous remettre en forme physique et mentale.2. Évitez les e-mails et les messages sur les réseaux sociaux ava…
Je sens que je ne peux pas contrôler mes émotions et je perds souvent mon sang-froid à cause de petites choses, ce qui rend les gens autour de moi mal à l'aise	La difficulté à contrôler ses émotions peut être difficile à gérer, surtout si cela affecte la relation avec les autres. Voici quelques suggestions qui pourraient vous aider :1. Apprenez à reconnaître vos émotions : il est important de savoir ce que vous vous sentez et ce qui vous pousse à ressentir une émotion spécifique.2. Apprenez à gérer vos émotions : Il est important de savoir comment vous …
Il n'y avait pas d'amour dans ma famille, pas de parole chaleureuse, pas de véritable sentiment de sécurité, je ne recevais que des reproches et subissais des pressions, alors je suis devenu plus introverti et je ne voulais interagir avec personne.	Il est compréhensible que vous ayez vécu une enfance difficile et que vous ayez ressenti un manque d'amour et de soutien dans votre famille. Ces expériences peuvent avoir un impact significatif sur votre confiance en vous et votre capacité à établir des relations saines avec les autres.Il est important de comprendre que l'amour et le soutien ne sont pas des commodités que l'on donne ou reçoit, ma…
Je m'inquiète pour mon avenir, je ne sais pas si j'aurai du succès, si je pourrai réaliser mes rêves	Il est normal d'avoir des doutes concernant l'avenir, surtout lorsque nous nous engageons dans quelque chose de nouveau ou lorsque nous cherchons à atteindre nos objectifs. Cependant, il est important de se rappeler que le succès et la réalisation de nos rêves sont le résultat d'un effort continu, de la persévérance et de la détermination.Il est important de prendre des mesures pour vous orienter…
J'ai l'impression de ne pas pouvoir gérer le stress et les défis de ma vie, et je souffre souvent de mauvaise humeur, d'anxiété et d'insomnie.	Il est compréhensible que vous ressentiez de la pression et que vous ayiez du mal à gérer votre stress et vos défis de vie. La pression et le stress peuvent être sources de maux de tête, d'anxiété et d'insomnie, ce qui peut avoir un impact négatif sur votre bien-être émotionnel et physique.Il est important de comprendre que le stress est un élément normal de la vie et que tout le monde peut se se…
Je me sens seul, j'ai beaucoup de gens autour de moi mais je n'ai pas toujours l'impression de pouvoir vraiment me lier avec eux, est-ce un trouble relationnel ?	Il est compréhensible que vous ressentiez de la solitude malgré avoir de nombreux contacts. Cependant, il est important de comprendre que la solitude et les problèmes relationnels peuvent être des expériences différentes.La solitude peut être causée par de nombreux facteurs, tels que le travail, les obligations familiales ou sociales, ou encore des choix personnels tels que la préférence pour la …
Je me sens très mal à l'aise face à l'avenir, je ne sais pas quoi faire et je ne sais pas ce que l'avenir me réserve	Il est normal de se sentir mal à l'aise face à l'avenir, surtout si vous ne savez pas quoi faire ou où vous en êtes dans votre vie. Voici quelques conseils pour vous aider à vous sentir plus à l'aise :1. Écoutez vos pensées : prenez le temps d'écouter vos pensées et vos sentiments. Identifiez les inquiétudes qui vous accompagnent et essayez de les exprimer. Parfois, c'est la seule manière de vous…
J'ai beaucoup de problèmes dans mon mariage et je me sens déprimé et impuissant et je ne sais pas quoi faire	Je suis désolé d'apprendre que vous rencontrez des problèmes dans votre mariage et que cela vous fait vous sentir déprimé et impuissant. Voici quelques conseils qui pourraient vous aider :1. Parlez-en avec votre partenaire : il est important de parler de vos sentiments avec votre partenaire. Expliquez-leur ce que vous ressentez et ce qui ne va pas. Essayez de trouver des solutions ensemble.2. Con…
Je me sens souvent très fatigué, physiquement et mentalement faible, et parfois même j'ai des pensées suicidaires, ayant l'impression que ma vie n'a pas de sens	Je suis désolé d'apprendre que vous vous sentez souvent fatigué, physiquement et mentalement faible, et que vous avez des pensées suicidaires. Voici quelques conseils qui pourraient vous aider :1. Parlez-en avec un professionnel : il est important de parler de vos sentiments avec un professionnel de la santé mentale. Ils pourront vous aider à comprendre vos sentiments et à trouver des solutions p…
Il m'arrive parfois de ressentir soudainement des sensations de peur et de panique extrêmes, et il m'est difficile de contrôler mes émotions et mon comportement, cet état peut durer pendant une période prolongée.	Il est difficile de résumer votre situation sans plus de détails, mais je suis là pour vous écouter. Si vous rencontrez des sentiments de peur et de panique extrêmes, il est important de parler avec un professionnel de la santé mentale. Ils pourront vous aider à comprendre les raisons de ces émotions et à trouver des solutions pour vous sentir mieux. Il est également important de prendre soin de …
Chaque fois que je fais face à un nouveau défi, je me sens tellement nerveux et peu sûr de moi que j'ai l'impression de ne pas pouvoir le gérer	Il est normal d'avoir des sentiments de crainte et de nerfousness lorsqu'on est confronté à de nouveaux défis. C'est d'ailleurs tout à fait normal. La situation est comparable à celle d'un athlète qui doit améliorer ses performances sur le terrain. Tout d'abord, son corps doit s'adapter à la nouvelle routine et à la nouvelle charge de travail. À mesure qu'il s'habitue, il se sentira de plus en pl…
J'ai parfois l'impression soudaine de ne plus avoir de passe-temps, de ne m'intéresser à rien et d'avoir perdu ma direction et ma motivation	Il est tout à fait normal d'avoir des périodes où nous ne trouvons pas d'intérêt ou de passion pour les choses qui nous tiennent à cœur. Cela peut être dû à de nombreux facteurs, tels que des changements personnels, des événements stressants ou des sentiments de frustration et d'épuisement.Il est important de se rappeler que les sentiments de boredom et d'ennui sont courants et temporaires. Il ex…
De temps en temps, une émotion incontrôlable me vient au cœur, je me demande ce que je devrais faire si je souffre de dépression	Il est normal d'avoir des émotions intenses et incontrôlables à certaines moments. Si vous vous sentez déprimé, il est important de prendre des mesures pour vous soutenir et vous aider à vous sentir mieux.Voici quelques suggestions qui pourraient vous aider:1. Parlez à quelqu'un de confiance. Parlez à un ami, à un membre de votre famille ou à un professionnel de la santé mentale. La discussion pe…
J'ai toujours ressenti un malaise physique et j'ai toutes sortes de symptômes étranges, mais les médecins disent que je suis en bonne santé, ce qui me rend très anxieux et impuissant.	Il est normal d'avoir des inquiétudes lorsqu'on ressent des symptômes étranges et qu'on est diagnostiqué comme étant en bonne santé. Il est important de garder à l'esprit que la médecine est une science en constante évolution et que les diagnostics peuvent être erronés ou incomplètement compris.Voici quelques suggestions qui pourraient vous aider:1. Parlez à votre médecin de vos inquiétudes et de…
Du fait d'une exposition prolongée à un environnement stressant, Huang Xiaoming a des insomnies fréquentes, ne différencie plus le jour de la nuit et a complètement perdu son rythme de vie	Voici une proposition de plan de séance pour la scène 11, scène 6 :[SCÈNE 11 : 6][Cadre : Un endroit calme et lumineux, Huang Xiaoming est assis dans une chaise confortable, les yeux fermés. Il semble être en transe.][Cadre : La caméra se rapproche de Huang Xiaoming.][Huang Xiaoming (voix off)] : Je me souviens avoir pris des congés payés pour me reposer, mais finalement, je me suis retrouvé dans…
Ma relation avec mes amis n'a jamais été excellente, j'ai l'impression d'avoir du mal à me faire de vrais amis et cela me fait me sentir très seul	Je comprends. La solitude peut être difficile à gérer, surtout si vous avez l'impression de ne pas avoir de vrais amis. Il peut y avoir plusieurs raisons pour lesquelles vous avez des difficultés à vous faire des amis :1. Vos préférences : Vous pouvez avoir des préférences culturelles, intellectuelles ou émotionnelles qui vous différencient de vos amis potentiels. Il est important de comprendre q…
Les gens autour de moi pensent toujours que je suis trop nerveux et que je m'inquiète pour de petites choses, comment puis-je me détendre ?	Il peut être difficile de se détendre lorsque les gens autour de vous pensent que vous êtes nerveux, mais il y a plusieurs stratégies que vous pouvez essayer pour vous aider à vous détendre et à gérer votre stress :1. Pratiquez la méditation : La méditation peut vous aider à vous concentrer sur votre respiration, votre ressenti et à vous libérer des pensées stressantes. Il existe de nombreuses ap…
Mes insomnies m'obligent à voir un psychiatre tous les soirs	Il est compréhensible que les insomnies puissent causer des problèmes de santé mentale et physique. Il est important de consulter un professionnel de la santé pour trouver des solutions pour améliorer la qualité du sommeil. Voici quelques idées qui pourraient vous aider : 1. Évitez d'utiliser votre téléphone, votre ordinateur ou votre tablette de manière excessive avant de vous coucher, car les é…
Je sens que je ne suis pas capable de faire face à la pression familiale et celle de la société, et je ne peux pas accomplir beaucoup de choses	Il est compréhensible que vous ressentiez de la pression de la famille et de la société. En tant qu'être humain, nous sommes tous influencés par les attentes et les normes sociales qui nous entourent. Il est important de se rappeler que vous êtes unique et que vous avez le droit de choisir votre propre chemin dans la vie.Pour vous aider à surmonter cette pression, je vous suggère de prendre des m…
J'ai l'impression que mes relations se détériorent, ni ma famille ni mes amis ne me font confiance ou ne me soutiennent, cela me fait me sentir tellement perdu et désespéré.	Il est compréhensible que vous ressentiez de l'isolement et de la désespoir en raison de la détérioration de vos relations. Il est important de se rappeler que la confiance et l'appui de nos proches peuvent être des éléments clés pour notre bien-être émotionnel et psychologique. Voici quelques suggestions pour améliorer vos relations :1. Prenez le temps de réfléchir aux relations que vous avez ma…
Je me sens souvent incapable de contrôler mes émotions et mon comportement et j'agis souvent de manière impulsive ou violente.	Il est compréhensible que vous ressentiez de la difficulté à contrôler vos émotions et votre comportement. Les émotions peuvent parfois être très fortes et difficiles à gérer. Voici quelques suggestions pour vous aider à mieux contrôler vos émotions et votre comportement :1. Pratiquez la pleine conscience (mindfulness) : La pleine conscience est une technique qui vous permet de vous concentrer su…
J'ai souvent peur d'être rejeté, donc je dis rarement ce que je pense	En fin de compte, la clé pour mieux contrôler vos émotions et votre comportement est de consci USER: hello
La dépression a commencé à se développer progressivement pendant l'adolescence	La dépression peut débuter à différents âges, y compris durant l'adolescence. L'adolescence est une période de développement importante et de changement, où les individus commencent à explorer leur identité et à rencontrer des défis sociaux et émotionnels.La dépression pendant l'adolescence peut être différente de la dépression chez les adultes. Les adolescents peuvent avoir des préoccupations pl…
Je me sens insatisfait de mon apparence et de mon corps, je me sens loin d'être parfait et je me sens souvent anxieux et peu sûr de moi	Il est naturel d'avoir des préoccupations concernant notre apparence et notre corps. Cependant, ces préoccupations peuvent devenir excessives et amener des sentiments tels que l'anxiété, la dépression et la dévalorisation narcissique. Ces sentiments peuvent avoir un impact négatif sur notre bien-être émotionnel et notre qualité de vie.Pour gérer ces sentiments, il est important de se rappeler que…
J'ai toujours peur de ne pas assez bien faire, même si les autres me félicitent, je n'arrive pas abandonner mes inquiétudes	L'anxiété peut être un sentiment difficile à surmonter, mais il existe des stratégies qui peuvent vous aider à mieux gérer cette préoccupation. Voici quelques suggestions qui peuvent vous aider :1. Apprenez à reconnaître vos inquiétudes : Il est important de comprendre ce qui vous inquiète, pour pouvoir gérer ces préoccupations de manière plus efficace. Essayez de décomposer vos inquiétudes en dé…
Je trouve que j'ai de plus en plus de mal à me concentrer, que ce soit en lisant ou en faisant autre chose, je suis facilement distrait	La difficulté à se concentrer peut être un symptôme de plusieurs problèmes de santé mentale ou de troubles du sommeil. Si cela vous préoccupe, il est important de consulter un professionnel de la santé pour obtenir un diagnostic et un traitement approprié.Cependant, voici quelques conseils qui peuvent vous aider à améliorer votre concentration :1. Établissez un lieu de travail confortable : Assur…
J'ai toujours l'impression de n'avoir aucune valeur, je ne sais pas quel est le sens de mon existence, et je me sens chaque jour vide et impuissant.	Ces sentiments peuvent être difficiles à vivre, mais il est important de savoir que vous ne êtes pas seul dans cette situation. De nombreux gens ont l'impression d'être insignifiants ou de n'avoir aucune valeur. Cependant, il est important de se rappeler que chaque individu est unique et a sa propre signification et valeur.Pour trouver votre propre signification et valeur, vous pouvez essayer de …
Je suis terrifiée à l'idée d'interagir avec les gens, j'ai peur d'être rejetée, ridiculisée ou incomprise, et je me sens souvent seule et impuissante.	Je comprends que cela puisse être difficile et intimidant de se sentir terrifiée à l'idée d'interagir avec les gens. Cependant, il est important de se rappeler que vous n'êtes pas seule dans cette situation. De nombreux gens ont des difficultés d'interaction sociale et peuvent avoir été rejetés, ridiculisés ou incompris à l'école ou dans leur vie quotidienne.Il peut être utile d'essayer de vous c…
Je suis très insatisfaite de mon apparence et de ma silhouette, je me sens laide et peu attirante. J'ai souvent pensé à faire une chirurgie plastique et à perdre du poids, mais je suis également inquiète des risques de la chirurgie et j'ai peur d'être ridiculisée et rejetée par les autres.	Je comprends que cela puisse être difficile de s'accepter comme vous êtes, mais il est important de se rappeler que la beauté ne se mesure pas à la physique. Chacun est unique et apporte quelque chose d'special à la société. Il est important de se rappeler que la beauté est personnelle et qu'il est important de se concentrer sur ce qui est important pour vous, plutôt que de se laisser submerger p…
Je me couche souvent tard et je fais des heures supplémentaires pour le travail, ce qui aggrave de plus en plus ma condition physique, mais je ne peux pas m'arrêter, car je sens que ce n'est qu'ainsi que je pourrai prouver ma valeur et mes capacités	Je comprends que vous voulez prouver votre valeur et votre capacité à votre travail, mais il est important de se rappeler que votre santé physique est également importante. Il est important de trouver un équilibre entre votre travail et votre santé, car cela peut avoir un impact négatif sur votre santé à long terme.Il peut être utile de parler avec votre employeur ou avec votre médecin pour discu…
Je me sens devenir de plus en plus accro aux jeux et aux réseaux sociaux, comme si ces choses étaient devenues partie intégrante de ma vie, cette dépendance me fait me donne l'impression d'être incapable de m'en sortir et de perdre mon identité, j'espère trouver un moyen de me débarrasser de cette dépendance.	Il est tout à fait normal d'avoir des sentiments d'inquiétude ou de préoccupation en cas de dépendance aux jeux ou aux réseaux sociaux, car cela peut affecter négativement votre vie quotidienne et votre bien-être mental. Cependant, il est essentiel de comprendre que définir une limite et prendre des mesures pour gérer cette dépendance est un pas en avant vers une meilleure santé mentale et physiq…
Cela me dérange que mon humeur soit toujours changeante, parfois je suis très heureuse, et d'autres fois je suis tellement déprimée que j'ai même envie de me suicider.	Il est important de comprendre que les changements d'humeur récurrents peuvent être un signe d'une dépression ou d'un trouble de l'humeur, qui peuvent avoir un impact négatif sur votre vie quotidienne. Si vous éprouvez des pensées suicidaires ou si vous avez des difficultés à vous concentrer ou à vous engager dans des activités que vous aimez, il est important de consulter un professionnel de la …
Parfois j'ai l'impression que personne ne se soucie de moi et je suis le seul sur qui je peux vraiment compter	Il est compréhensible que vous éprouviez une telle impression si vous vous sentez isolé et si vous n'avez pas de personnes à qui vous pouvez vous confier. Cependant, il est important de se rappeler que vous n'êtes pas seul dans cette situation et que vous pouvez trouver des personnes à qui vous pouvez faire confiance.Voici quelques idées pour vous aider à trouver des personnes avec qui vous pouve…
Récemment, je souffre souvent d'insomnie et je me tourne et me retourne sans cesse dans mon lit la nuit. Est-ce que cela pourrait être un problème psychologique sous-jacent ?	Il est possible que l'insomnie et le tourner et retourner dans le lit pendant la nuit soient des signes d'un problème psychologique sous-jacent. Les troubles du sommeil peuvent être causés par des facteurs psychologiques tels que la stress, l'anxiété, la dépression ou les pensées obsédantes qui rendent difficile de dormir. Il est important de consulter un professionnel de la santé pour évaluer le…
Ma relation avec ma famille n'a jamais été bonne, j'ai l'impression qu'ils ne me comprennent pas, ne me respectent pas, ça me fait me sentir seul	Il est compréhensible que vous vous sentez mal en compagnie de votre famille si vous avez éprouvé des difficultés à communiquer et à vous entendre. Les relations familiales peuvent être très complexes et il est important de reconnaître que cela peut être difficile de gérer.Il est important de souligner que vous avez le droit de vous sentir respecté et compris. Si vous avez l'impression que votre …
Je me sens souvent vide et seul à l'intérieur, cherchant quelque chose pour combler le vide, mais souvent je ne trouve pas le bon moyen de soulager ce sentiment	Il est compréhensible que vous vous sentez vide et seul à l'intérieur, car les sentiments de vide et d'isolement peuvent être difficiles à gérer. Il est important de comprendre que cela peut être dû à plusieurs facteurs, tels que des expériences traumatisantes, des problèmes de santé mentale, des relations interpersonnelles non satisfaisantes ou une absence de but ou de direction dans la vie.Il e…
