# Supplementary material
Source: ML conference proceedings conference paper supplement (https://openreview.net/forum?id=JL42j1BL5h)
Supplement: supplementary_material [file Mental_Health_v.xlsx]

## Sheet: Sheet1
Input	Output
I often feel lonely and helpless, no one can understand me, I even feel like a loser, without any value and meaning, this feeling makes me very depressed and hopeless, I don't know how to get rid of them.	It sounds like you are struggling with feelings of loneliness and helplessness. It's important to remember that these feelings are common and many people have experienced them at some point in their lives. Here are some things that may help:1. Seek support: Talk to someone you trust about how you're feeling. It could be a friend, family member, or a professional like a therapist or counselor. Sha…
Even if I'm just going to buy a bag of chips, I worry that people will think I'm eating too much self-defeating behavior	It's normal to feel concerned about what others might think, but it's important to remember that ultimately, what you do is your choice and not everyone's opinion matters. It's okay to treat yourself every once in a while and enjoy a snack or meal that you enjoy.It might be helpful to reframe your thoughts and focus on the fact that you are making a healthy choice for yourself. Instead of thinkin…
I was always feeling tired and powerless, unable to focus on my tasks or even work on the things I was interested in, which made me very frustrated.	It sounds like you are struggling with a lack of motivation and feeling overwhelmed. It's important to remember that these feelings are common and many people have experienced them at some point in their lives. Here are some things that may help:1. Identify the cause: Try to identify why you are feeling tired and powerless. Is it due to lack of sleep, stress, or other factors? Once you identify t…
Recently, I can't sleep well, or I have nightmares when I fall asleep, and I feel very tired and tired when I wake up.	It sounds like you are experiencing sleep disturbances and feeling tired and fatigued as a result. Sleep is an important part of our overall health and well-being, so it's important to take steps to improve your sleep if you're having trouble. Here are some things that may help:1. Establish a consistent sleep routine: Try to go to bed and wake up at the same time every day, even on weekends. This…
Every time I go to the doctor, there is no improvement, and my mood gets worse, and I often fall into self-pity	It is understandable to feel frustrated and overwhelmed when dealing with ongoing health issues. It is important to prioritize your physical and mental health and to seek support from healthcare professionals and loved ones when needed. If you are struggling with symptoms of depression or other mental health concerns, it may be helpful to speak with a mental health professional who can provide yo…
I always felt isolated and excluded, even in crowds.	1. Seek support: Talk to someone you trust about how you're feeling. This could be a friend, family member, or a professional like a therapist or counselor. Sharing your thoughts and feelings can help you feel less alone and more understood.2. Practice self-care: Take care of yourself by engaging in activities that make you feel good. This could be something simple like taking a relaxing bath, go…
Let yourself be addicted to games, or the Internet is an invisible psychological pressure	Video games and the internet can be enjoyable and entertaining, but excessive use can have negative impacts on mental health and well-being. It's important to find a balance and not let them interfere with daily life and responsibilities.
I have been under too much pressure recently, I feel very anxious every day, I don’t sleep well, I have a headache, my heart beats fast, and I feel like I’m going to collapse at any time	It is understandable to feel stressed and overwhelmed when dealing with a heavy workload or other stressors in your life. It is important to take steps to manage your stress and promote your overall well-being. Here are some strategies that may be helpful:1. Practice relaxation techniques: Techniques such as deep breathing, meditation, or yoga can help reduce stress and promote relaxation.2. Exer…
Every time I encounter difficulties and setbacks, I always lose confidence and motivation and feel that I cannot handle it	It's common to feel discouraged and lack motivation when encountering difficulties and setbacks. However, it's important to remember that these feelings are temporary and can be overcome with the right mindset and strategies. Here are some tips to help you build confidence and motivation when facing challenges:1. Reframe your thinking: Instead of focusing on the negative aspects of the situation,…
I'm always worried that what I'm doing isn't good enough, and I feel like I'm constantly being judged by other people, and it's depressing.	I'm sorry to hear that you're feeling this way. It sounds like you may be struggling with anxiety and self-doubt. Here are some tips that may help you manage these feelings:1. Practice self-compassion: Be kind to yourself and recognize that everyone makes mistakes. Instead of focusing on your failures, try to focus on what you've accomplished.2. Reframe your thinking: Challenge negative thoughts …
I was always worried about whether I was doing everything right, and was afraid of what other people would think or criticize me, and I was often plunged into painful self-doubt as a result.	It sounds like you're struggling with feelings of self-doubt and fear of criticism. Here are some tips that may help you manage these feelings:1. Practice self-compassion: Be kind to yourself and recognize that everyone makes mistakes. Instead of focusing on your failures, try to focus on what you've accomplished.2. Reframe your thinking: Challenge negative thoughts and replace them with more pos…
I keep my thoughts in my heart, I always feel that I will explode, and I can't hide from the eyes of others	It sounds like you're feeling overwhelmed and like you're carrying a heavy burden on your shoulders. Here are some tips that may help you manage these feelings:1. Practice self-care: Take care of your physical and emotional health. Make sure you're getting enough sleep, eating well, and engaging in activities that make you feel good.2. Find healthy ways to express your emotions: Write in a journa…
My family experienced a sudden accident, both of my parents were seriously injured, which made me feel helpless and depressed, and even developed symptoms of depression.	I'm sorry to hear about the accident and the impact it has had on you and your family. Dealing with a sudden accident and the aftermath can be extremely challenging and overwhelming. It is understandable to feel helpless, depressed, and experience symptoms of depression in response to such a traumatic event.It is important to prioritize your own mental and physical health during this difficult ti…
I found myself less and less comfortable with people, always preferring to be alone, not interested in socializing or sharing my life with others, this loneliness made me feel very depressed	It is not uncommon for individuals with ADHD to experience challenges in socializing and forming close relationships with others. This can lead to feelings of loneliness and isolation, which in turn can exacerbate symptoms of ADHD and contribute to feelings of depression.One of the primary symptoms of ADHD is difficulty with sustained attention and focus, which can make it difficult to maintain r…
I have a strong desire for control and always want to manipulate everything in my own hands, not allowing others to interfere or intervene, which leads to broken relationships.	It is not uncommon for individuals with ADHD to struggle with issues related to control and power. This can manifest in a variety of ways, such as a strong desire for control over one's environment, relationships, and decision-making.This desire for control can make it difficult for individuals with ADHD to form and maintain healthy relationships, as they may struggle to trust others and may feel…
I often feel that my mind is very chaotic, as if there are too many thoughts and voices in my head at the same time, making me feel very confused and lost	1. Seek support: Talk to a therapist or counselor about your feelings. They can help you process your emotions and provide a safe space to share your thoughts and feelings.2. Practice self-care: Take care of your physical and emotional health. Make sure you're getting enough sleep, eating well, and engaging in activities that make you feel good.3. Connect with others: Reach out to friends and fam…
Why is it that everything I do is criticized by my family?	It is not uncommon for family members to have differing opinions and to offer criticism at times. In some cases, this may be due to a variety of factors, such as differences in personality, values, or expectations. It is important to remember that criticism is not always meant to be hurtful, and it may be an opportunity for growth and learning. It may be helpful to try to understand the perspecti…
Recently, I always feel exhausted and have no energy every day, even after sleeping for a long time, it doesn’t get better	It's possible that you may be experiencing symptoms of a sleep disorder, such as insomnia or sleep apnea. These conditions can cause a person to feel tired and fatigued even after getting a full night's sleep. In some cases, depression or anxiety may also contribute to fatigue. It is important to speak with a healthcare professional to determine the underlying cause of your fatigue and to develop…
I feel like I've lost all motivation and hope and life feels meaningless	It can be difficult to feel motivated and hopeful when you are struggling with these feelings. In some cases, feelings of hopelessness and meaninglessness may be a sign of depression or another mental health condition. It is important to speak with a healthcare professional to determine the underlying cause of your symptoms and to develop a treatment plan. They may recommend measures such as ther…
I feel very nervous sometimes, and I also feel down sometimes, but I don't know how to change my mood	It's natural to feel nervous or down from time to time, and it's important to remember that these feelings are a normal part of life. However, if you are finding it difficult to shift your mood and are concerned about your emotional well-being, it may be helpful to speak with a healthcare professional. They can offer advice and support to help you manage your symptoms and improve your overall men…
I have problems with my thinking and perception, and I often hear strange sounds or see strange things, which make me feel very scared	It can be distressing to experience perceptual disturbances or hallucinations. In some cases, these symptoms may be a sign of a mental health condition, such as schizophrenia or another psychotic disorder. It is important to speak with a healthcare professional to determine the underlying cause of your symptoms and to develop a treatment plan. They may recommend measures such as therapy and medic…
I often feel tense and anxious, unable to control my emotions and stress, which makes me feel very restless and restless.	It can be difficult to manage feelings of anxiety and stress, especially when they feel overwhelming. In some cases, these symptoms may be a sign of a mental health condition, such as generalized anxiety disorder or another anxiety disorder. It is important to speak with a healthcare professional to determine the underlying cause of your symptoms and to develop a treatment plan. They may recommen…
I often feel lonely and helpless, even when I have people around me, I still feel empty. I don't know why I feel this way, how can I seek help?	It is not uncommon for individuals with ADHD to experience feelings of loneliness and emptiness, even when they are surrounded by others. This can be due to a variety of factors, such as difficulties with socializing and forming close relationships, difficulty with self-expression, and challenges with emotional regulation.If you are experiencing feelings of loneliness and emptiness, it may be hel…
I have been traumatized in the past, and now I always recall that experience with fear and pain, and I need to seek help to overcome this emotion.	It is not uncommon for individuals with ADHD to experience difficulties with emotional regulation and processing trauma. Trauma can have a lasting impact on mental health and well-being, and the symptoms of trauma can persist long after the traumatic event has passed.If you are experiencing symptoms of trauma, it is important to seek professional support. A mental health professional, such as a t…
I can't get rid of the memories of the past, and whenever I think about certain things, I feel very painful, and it even affects my daily life	It is not uncommon for past experiences to remain with us and affect our present. It can be helpful to talk to a therapist or counselor about your memories and feelings. They can provide support and guidance as you work through your past and develop coping mechanisms to manage any negative impacts on your daily life. It may also be helpful to engage in activities that bring you joy and help you f…
I used to be bullied and now whenever I think about it I feel scared and even have nightmares	It's understandable that you might feel scared and have nightmares about something that happened to you in the past. Bullying can be a traumatic experience, and it's important to take care of your mental health and wellbeing.It might be helpful for you to talk to a therapist or counselor about your experiences. They can help you work through the emotions and thoughts that come up for you related …
I feel more and more lonely, no friends, no relatives, even if someone is around, I feel very empty and uncomfortable	It's understandable to feel lonely, especially if you don't have many close relationships. Building and maintaining relationships takes time and effort, but it can also be a rewarding experience.Here are a few things you can try to help improve your sense of connection and reduce loneliness:1. Reach out to others: Start by reaching out to people you know, even if it's just a quick text or call. T…
I always feel like I can't concentrate, it's hard to complete tasks, and I'm often tired and depressed	It can be difficult to concentrate and complete tasks when you're feeling tired and depressed. Here are a few things you can try to help improve your focus and mood:1. Get enough sleep: Lack of sleep can make it difficult to concentrate and complete tasks. Try to get 7-9 hours of sleep each night.2. Exercise: Regular physical activity can help improve mood and increase energy levels.3. Practice m…
I often feel lonely and lost, unable to establish close relationships with others, and even lose interest and enthusiasm for people and things around me.	It's understandable to feel lonely and lost at times, especially if you're having trouble establishing close relationships with others. Building and maintaining relationships takes time and effort, and it can be a challenging process.Here are a few things you can try to help improve your sense of connection and reduce loneliness:1. Reach out to others: Start by reaching out to people you know, ev…
I feel alone and lost and I don't feel like I can form close relationships with other people, which makes me very depressed and helpless	It can be difficult to feel connected and form close relationships with others, especially if you're feeling depressed and helpless. Here are a few things you can try to help improve your sense of connection and reduce loneliness:1. Reach out to others: Start by reaching out to people you know, even if it's just a quick text or call. This can help you build relationships and feel more connected.2…
Everyone around me is happy, but I feel empty inside, unable to enjoy any joy	It is not uncommon for individuals with ADHD to experience difficulties with emotional regulation and experiencing joy and fulfillment. The symptoms of ADHD can make it challenging to form close relationships and engage in activities that bring joy and fulfillment, leading to feelings of emptiness and dissatisfaction.If you are feeling empty and unable to experience joy, it may be helpful to seek…
I had low self-esteem and often felt useless and insignificant, causing me to be afraid to pursue my dreams and goals, fearing failure and being looked down upon by others.	It's understandable to feel that way, but it's important to remember that everyone makes mistakes and experience setbacks. It's not about being perfect, but about learning from your experiences and growing as a person. Remember that your dreams and goals are important to you, and that you have the power to pursue them, regardless of what others may think. It's never too late to start pursuing you…
I find myself becoming overly sensitive to things and often feel restless and worried about little things	It's common for people to experience feelings of sensitivity, restlessness, and worry from time to time. However, if these feelings are persistent and interfering with your daily life, it's important to seek support.Here are some steps you can take to manage these feelings:1. Practice mindfulness: Mindfulness practices such as meditation or deep breathing can help you stay present and calm in the…
My parents always had high expectations of me to be a good person, but I felt like I was not up to their standards, I was anxious and low self esteem	It's common for children to feel pressure to live up to their parents' expectations, especially if those expectations are high. Feeling like you're not meeting those expectations can be a source of anxiety and low self-esteem.Here are some tips that may help:1. Practice self-compassion: Be kind to yourself and recognize that everyone makes mistakes. Try to focus on your strengths and positive qua…
I dream every day, repeating it over and over, as if lost in a maze with no exit	It's not uncommon to have recurring dreams, especially if they involve a theme or symbolism that is significant to you. However, if your dreams are causing distress or interfering with your daily life, it may be helpful to explore them further.Here are some steps you can take to try to understand your recurring dreams:1. Keep a dream journal: Write down the details of your dreams as soon as you w…
Whenever I'm alone, I think about everything that happened before, and everything makes me feel so miserable	It's normal to sometimes dwell on past events and experiences, especially if they were difficult or traumatic. However, if these thoughts are causing you significant distress, it may be helpful to explore them further and develop strategies to manage them.Here are some steps you can take to manage your thoughts and feelings when you're alone:1. Practice mindfulness: Mindfulness practices such as …
When I see my body, I feel so ugly, so bad	Here are some tips that may help you feel more positive about your body:1. Practice self-compassion: Be kind to yourself and recognize that everyone has unique physical characteristics. Try to focus on your strengths and positive qualities rather than dwelling on your perceived flaws.2. Practice positive self-talk: Catch yourself when you have negative thoughts about your body and replace them wi…
I have autism, I don't know how to communicate with others, I feel isolated in a completely different world, I feel very miserable and helpless.	I'm sorry to hear that. It can be difficult to feel isolated and misunderstood, especially when it comes to something as complex as autism. However, it's important to know that there are people and resources available to help you.One way to start communicating with others is to find a support group or therapist who specializes in working with individuals on the autism spectrum. They can provide y…
I was once betrayed by a friend, it hurt me so much, I began to doubt the reliability of humanity and friendship, and even began to close myself and alienate others	It's understandable to feel hurt and betrayed by a friend, as it can be a painful experience. However, it's important to remember that not all people are trustworthy, and that not all friendships will last. It's normal to feel doubtful and guarded after a betrayal, but it's also important to give yourself time to heal and to surround yourself with people who are trustworthy and supportive.It's al…
In today's society, people often give up on themselves or even commit suicide because they cannot complete their work.	It's true that in today's society, people often feel overwhelmed and stressed due to the high expectations and pressures to succeed. This can lead to feelings of frustration, hopelessness, and even suicide. It's important to remember that it's okay to ask for help and that it's not a sign of weakness.If you're struggling to complete a task, it's important to take a step back and assess the situat…
I was always thinking about my past and my future, feeling anxious and upset about it, not knowing what to do with it.	It's natural to think about the past and future, as they can have a significant impact on our present. However, when these thoughts become overwhelming and cause anxiety and upset, it can be helpful to take steps to manage them. Here are some suggestions:1. Practice mindfulness: Focus on the present moment by paying attention to your senses and feelings. This can help you shift your attention awa…
I always feel awkward whenever I'm in front of a large group of people	It's common to feel nervous or uncomfortable in social situations, especially when speaking to a large group of people. Here are some tips that may help you feel more confident and comfortable in these situations:1. Prepare in advance: Take some time to think about what you will say and practice your speech or presentation. This can help you feel more confident and in control.2. Focus on your aud…
I am dissatisfied with my appearance and always feel ugly, which makes me very unconfident in socializing and making friends. How can I change this mentality?	It's understandable to feel self-conscious about your appearance at times, but it's important to remember that everyone has their own unique qualities and beauty. Here are some tips that may help you change your mentality:1. Practice positive self-talk: Instead of focusing on your perceived flaws, try to focus on your positive qualities and compliment yourself.2. Practice self-care: Taking care o…
I am full of fear and anxiety about the future, and I don't know how to deal with the challenges and pressures in the future.	It's natural to feel fear and anxiety about the future, especially when facing challenges and pressures. Here are some tips that may help you deal with these feelings:1. Practice mindfulness: Focus on the present moment by paying attention to your senses and feelings. This can help you shift your attention away from future worries.2. Set goals: Establish goals for yourself that are realistic and …
I find myself constantly getting stuck in unstoppable thought loops, ruminating over the same problem or situation over and over, which leads to poor sleep and daily life.	It's not uncommon to get stuck in unstoppable thought loops, ruminating over the same problem or situation over and over. This can lead to poor sleep and daily life. Here are some tips that may help you break the cycle:1. Practice mindfulness: Focus on the present moment by paying attention to your senses and feelings. This can help you shift your attention away from unstoppable thoughts and rumi…
I have had some traumatic experiences that have stuck with me. I found it difficult to process these emotions and memories, which caused my mental health to gradually deteriorate.	I'm sorry to hear that you've experienced trauma and it's impacted your mental health. It's not uncommon for trauma to have a lasting impact on one's mental health. It's important to remember that healing takes time and that it's okay to seek help.One way to begin processing your emotions and memories is through therapy. A therapist can provide you with a safe and supportive space to talk about y…
I often feel depressed, lose the joy and motivation of life, and have no confidence in the future, this emotion makes me feel very painful and helpless	It's important to remember that feeling depressed, losing joy and motivation, and lacking confidence in the future are all common experiences. If you are struggling with these feelings, it may be helpful to reach out for support. This could involve talking to a trusted friend or family member, seeking out a therapist or counselor, or joining a support group. It can also be helpful to focus on sel…
Recently, their children often lose their temper and even destroy items in the house, which may be a symptom of depression	Losing temper and destroying items in the house can be a symptom of depression, as well as other mental health conditions such as anxiety or bipolar disorder. It is important for children who exhibit these behaviors to seek support and treatment from a mental health professional. This may involve therapy or medication, depending on the specific needs and diagnosis of the child. In addition to see…
I often feel stressed and anxious, even small things can make me feel restless and tense, it is difficult to relax and enjoy life	It sounds like you may be experiencing signs of chronic stress or anxiety, which can be challenging to manage on a daily basis. While there is no one-size-fits-all solution, there are many strategies that can help you reduce stress and anxiety and improve your overall well-being. Here are some tips to consider:1. Practice mindfulness: Mindfulness is a technique that involves focusing your attenti…
I am very dissatisfied with my body, I always feel too fat or too thin, and I don't know how to accept my body	It's natural to have days where we don't feel satisfied with our bodies, but it's important to remember that everyone has their own unique body shape and size, and that these differences are what make us all unique. Here are some tips that may help you to accept and love your body:1. Practice self-compassion: Remember that everyone has body image issues, and it's important to be kind to yourself.…
I lack confidence in my own performance and ability. I always feel that I can’t do well, and I’m afraid of failure and being laughed at by others.	It's understandable to feel this way, but it's important to remember that everyone has strengths and weaknesses, and it's okay to not be perfect. Here are a few things you can try to help build your confidence:1. Focus on your strengths: Instead of dwelling on your weaknesses, focus on the things you are good at and try to capitalize on those strengths. This will help you feel more confident and …
My moods fluctuated wildly, from very high to very low, without any pattern.	It's not uncommon for people to experience mood swings, but if you are experiencing significant and frequent mood fluctuations without any discernible pattern, it may be helpful to speak with a mental health professional. Mood swings can be a symptom of various mental health conditions, such as bipolar disorder, depression, or anxiety disorders.It may also be helpful to track your moods and try t…
When I'm in a crowd, I always feel ignored, or even non-existent, which makes me feel very alone and lost	It's understandable to feel this way if you often feel ignored or overlooked in crowds. However, it's important to remember that everyone has their own thoughts and concerns, and it's possible that others may not be consciously ignoring you.If you're feeling this way, it may be helpful to try to engage with others in a more active way, such as by introducing yourself to someone, asking a question…
I often feel that I am not good enough to gain the approval and respect of others	It's understandable to feel this way if you are constantly seeking the approval of others. However, it's important to remember that you are a unique individual with your own strengths and weaknesses, and that it's not necessary to be like everyone else in order to be accepted and respected.Here are a few things you can try to help build your self-esteem and improve your confidence:1. Focus on you…
I feel confused and helpless about the future, I don't know which direction to go, it makes me feel very anxious and restless	It's understandable to feel confused and helpless about the future, especially when you are facing significant life changes or uncertainty. It's important to remember that it's normal to feel this way and that many people go through similar experiences. If you are struggling with these feelings, it may be helpful to talk to a therapist or counselor. They can help you explore your thoughts and fee…
I was always worried that my actions and decisions would be criticized and disapproved by others, which made me very insecure and frustrated.	It can be difficult to feel secure and confident in your actions and decisions when you are constantly worried about criticism and disapproval from others. It's important to remember that you have your own values and beliefs, and that you should make decisions based on what is most important to you, even if they may not be popular or well-received by everyone. It can also be helpful to focus on b…
I want to commit suicide, but I'm too scared to do it. I just want to hide myself away and never come out again.	I'm sorry to hear that you are feeling this way. It's important to remember that seeking help is a sign of strength, not weakness. If you are feeling overwhelmed and considering suicide, it is important to reach out for support immediately. You can call a crisis hotline or emergency services in your area, or talk to a trusted friend or family member. It can also be helpful to seek out therapy or …
My family always criticizes me and makes me feel very hurt, I don't know how to communicate with them, they have become so distant to me	1. Set goals: Identifying your long-term goals and short-term objectives can give you a sense of purpose and direction. Make a list of your goals and break them down into smaller, achievable steps.2. Focus on the present: Try to live in the present moment and focus on the tasks and activities that are immediately in front of you. This can help you avoid getting overwhelmed by the future and incre…
I used to get frustrated over little things, had trouble recovering from emotional lows, and felt worthless.	Thank you for sharing that with me. It's not uncommon for people to experience frustration, emotional lows, and feelings of worthlessness at some point in their lives. It's important to remember that these feelings are normal, and there are ways to manage and overcome them. Here are a few suggestions that may be helpful:1. Practice mindfulness: Mindfulness is the practice of being present in the …
I was bullied by my peers, which led to chronic low self-esteem and fear of rejection.	I understand that being bullied can be a difficult and traumatic experience, and it can have a lasting impact on your self-esteem and ability to form relationships. It's important to remember that the actions of others do not define you or your worth. Here are a few suggestions that may be helpful:1. Seek support: Talk to a therapist or counselor about your experiences. They can provide a safe an…
Recently, I always feel that my mood fluctuates a lot. Sometimes I am happy, but sometimes I am depressed for no reason. This makes me feel very troubled. I don't know if I am suffering from depression.	It's understandable to feel concerned about your mood and to wonder if you might be experiencing depression. Depression can present in a variety of ways, and it's common for people to feel a range of emotions. Here are a few things to consider:1. Mood changes: Depression can cause changes in mood, such as feeling sad, anxious, or hopeless. However, it's also possible to feel happy or content at t…
I was so stressed, I felt like I was going to be overwhelmed, I often felt flustered or breathless.	It's understandable to feel stressed and overwhelmed at times, and it's common to experience physical sensations such as feeling flustered or breathless. Here are a few things to consider:1. Stress management: Stress management techniques such as mindfulness, deep breathing exercises, and physical exercise can help to reduce stress and improve your ability to cope.2. Seek support: Talk to someone…
I often have feelings of anxiety and fear, not knowing where it is coming from, and sometimes it becomes difficult to even breathe.	1. Anxiety and fear management: Anxiety and fear management techniques such as mindfulness, deep breathing exercises, and physical exercise can help to reduce anxiety and improve your ability to cope.2. Seek support: Talk to someone you trust about how you are feeling. It can be helpful to have someone to talk to and listen to you without judgment.3. Practice grounding techniques: Grounding techn…
I've always felt worthless, not good enough, not smart enough, not pretty enough, and it's frustrating	It sounds like you are experiencing a lot of negative self-talk and low self-esteem. It's important to remember that these feelings are common, and many people struggle with them at some point in their lives. However, it's also important to recognize that these feelings can have a significant impact on your well-being and quality of life.One way to address these feelings is to work on building a …
I always have suicidal thoughts, I feel life is meaningless and I have no worth. I also feel hopeless and feel like there is no hope for my future	It's important to know that you're not alone in feeling these way and it's okay to feel this way. Suicidal thoughts and feelings are a sign that something is not right and it's important to take them seriously.It's essential to seek help as soon as possible. Reach out to a trusted friend or family member, a therapist, a counselor, or a crisis helpline. You can also speak to a doctor or mental hea…
I often feel like my life is meaningless, I don't know why I'm living this way, I feel like I have no purpose, no motivation, it's like I'm wasting my time, I feel worthless	It's important to know that you're not alone in feeling this way. These feelings can be caused by a variety of factors, including stress, trauma, or underlying mental health conditions such as depression or anxiety. It's important to recognize that these feelings are not permanent and with the right support, you can work towards feeling more motivated and fulfilled in your life.One way to address…
I've been feeling very stressed lately because I have a lot of work and I have to deal with many tasks every day, but I don't have a sense of accomplishment, which makes me feel very frustrated. How can I deal with this psychological pressure?	It sounds like you are experiencing a lot of pressure and stress related to your workload. Here are a few strategies that may help you manage these feelings:1. Set realistic goals: Make a list of all the tasks you need to complete, and prioritize them based on their importance and urgency. This will help you focus on the most important tasks and ensure that you are making progress on them.2. Brea…
I often feel anxious and tense, feeling like I can't handle the stresses and challenges in life.	It's normal to feel anxious and stressed from time to time, as life can be full of challenges and unexpected events. However, if you are feeling overwhelmed and unable to cope, it may be helpful to seek support from a mental health professional.Here are some strategies you can try to manage your anxiety and stress:1. Practice relaxation techniques: Techniques such as deep breathing, progressive m…
My mind is filled with negativity and self-doubt and I don't know how to get out of it	It's common to experience negative thoughts and self-doubt from time to time. Here are some strategies that may help you shift your mindset and move away from negative thinking:1. Challenge negative thoughts: When you notice a negative thought, ask yourself if there is evidence to support it. Is it based on facts or assumptions? Once you identify a negative thought, try to reframe it in a more po…
I feel that my emotions are becoming more and more unstable. Sometimes I feel depressed, and sometimes I feel emotional again. I don’t know if there is something wrong with my mind.	It's normal for emotions to fluctuate and feel unstable at times. However, if you are experiencing significant changes in your mood and it's impacting your daily functioning, it may be helpful to seek support from a mental health professional.Here are some strategies you can try to manage your emotions and promote emotional stability:1. Practice self-care: Take care of your physical and emotional…
When the child comes home from school, the atmosphere at home is always cold and rejecting towards him, except when he has done something wrong. He feels empty inside and is worried that he might become like his parents when he grows up.	It's important to recognize that the way a child is treated by their parents can have a significant impact on their emotional well-being and development. If a child feels rejected and unsupported at home, it can lead to feelings of insecurity and low self-esteem. It's important to address this issue by working on building a more positive and supportive home environment.One way to address this iss…
He can't sleep almost every night, can't sleep and can't fall asleep, his mood is getting worse and worse, and he is worried about whether he will have depression or other more serious psychological problems	pression or other more serious psychological problems
Recently, I always feel that I am vulnerable, and my thoughts are like a mess of ropes, unable to grasp	It's important to recognize that feeling vulnerable is a normal part of being human. We all have times when we feel uncertain or unsure of ourselves. However, it's also important to take steps to address these feelings and work towards feeling more secure and confident.One way to address feelings of vulnerability is to focus on building your self-esteem. This means recognizing and valuing your ow…
Every time I think about my failures, I feel helpless, I lose my courage at the thought of not being accepted by society, I feel helpless at the thought that I may not be able to achieve my dreams	1. Express your love and support: Let your child know that you love and support them, and that they are valued members of your family.2. Encourage open communication: Encourage your child to express their feelings and thoughts openly and honestly. This can help them feel heard and understood.3. Focus on positive interactions: Try to have positive interactions with your child, such as playing game…
My relationship has always been unstable, I often experience emotional distress, do not know how to deal with relationship problems, it makes me feel powerless and lost.	It's not uncommon for relationships to have ups and downs, and everyone experiences relationship problems at some point. It's important to remember that these issues are a normal part of relationships, and many couples successfully navigate these challenges with the help of therapy and other resources.If you're feeling powerless and lost when it comes to dealing with relationship problems, there …
Sometimes I lose control and become very irritable and angry, and even lash out at the people around me.	It's not uncommon for people to experience feelings of anger and irritability at times. However, if these feelings are causing problems in your life, it's important to address them.There are several things you can do to manage your anger and irritability. One effective strategy is to identify the triggers that cause these feelings. This can help you to anticipate and prepare for these situations,…
My job is stressful and dealing with problems and challenges every day makes me feel very anxious, I start to lose sleep, lose my appetite and sometimes feel out of control	It's not uncommon for people to experience stress and anxiety at work, especially in challenging or high-pressure jobs. However, if these feelings are interfering with your daily life, it's important to address them.There are several things you can do to manage your stress and anxiety at work. One effective strategy is to take breaks throughout the day to rest and recharge. This can help to reduc…
I am always unable to restrain my emotions. Sometimes I will suddenly get angry, and sometimes I will suddenly fall silent, which makes me unable to predict my own behavior and performance, and I feel very disturbed and confused.	It's not uncommon for people to experience emotional outbursts or difficulty regulating their emotions at times. However, if these feelings are causing problems in your life, it's important to address them.There are several things you can do to improve your ability to regulate your emotions. One effective strategy is to practice mindfulness, which involves paying attention to your thoughts and fe…
I can't get rid of the entanglement with unpleasant past experiences, and whenever I think about those events, I feel excruciating pain and loss.	It's not uncommon for people to struggle with difficult memories or past experiences that continue to cause distress. However, if these feelings are interfering with your daily life, it's important to address them.There are several things you can do to manage your distressing memories and past experiences. One effective strategy is to practice cognitive restructuring, which involves challenging n…
I often feel lonely and helpless, there is no one to talk to my inner world, I feel abandoned by the world, it makes me feel very painful and hopeless.	It can be very difficult to feel lonely and helpless, especially if you don't have anyone to talk to. It's important to remember that you are not alone in feeling this way, and there are many resources available to support you.One way to address feelings of loneliness is to seek out social connections with others. This can include joining clubs or groups that interest you, volunteering, or simply…
I often feel inferior and helpless because of my shortcomings, feel that I am not good enough, not worthy of love	It's common to feel inferior or helpless when we compare ourselves to others or when we perceive our own shortcomings. It's important to remember that everyone has their own strengths and weaknesses, and it's not possible to be perfect. The key is to focus on your own strengths and progress, and to work on improving areas where you feel weak.One way to address feelings of inferiority is to practi…
I have a lot of work and study pressure, and I often feel exhausted, but I don't know how to relax and relieve stress.	It's common to feel overwhelmed and stressed when facing work and study pressure. It's important to find ways to manage your stress and take care of yourself.One way to relieve stress is to engage in activities that bring you joy and relaxation. This can include things like reading, listening to music, taking a walk, or practicing yoga or meditation. It's important to find activities that work fo…
My mood changes so fast, it only takes a while from happy to sad, why is that?	Mood changes can be caused by a variety of factors, including life events, hormonal changes, and chemical imbalances in the brain. It is common for people to experience mood swings from time to time, but if you are experiencing rapid and intense mood changes that are impacting your daily life, it may be helpful to speak with a mental health professional. They can help you determine the underlying…
I am more likely to lose patience than others, and I feel needlessly depressed and pushed to the limit when I do small things	It sounds like you may be experiencing symptoms of anxiety or depression. It is common for people to feel stressed or overwhelmed at times, but if these feelings are impacting your daily life and causing you distress, it may be helpful to speak with a mental health professional. They can help you determine the underlying causes of your symptoms and provide you with strategies to manage them. In t…
Every time I think about going to the doctor or seeing a therapist, I feel intimidated and insecure. I worry that my problems will be exposed and judged by others. This fear prevents me from seeking help.	It is common to feel intimidated or insecure when considering seeking help for mental health concerns. However, it is important to remember that seeking help is a sign of strength, not weakness. Mental health professionals are trained to provide support and guidance, and they are legally bound to maintain confidentiality. They will not judge you or expose your problems to others.If you are feelin…
I have encountered a lot of setbacks and injustice in the workplace, which makes me feel very frustrated and hopeless in my life	It is understandable that experiencing setbacks and injustice in the workplace can be very frustrating and can impact your overall mood and outlook on life. It is important to remember that setbacks and injustices are a part of life, and they are not a reflection of your worth or abilities. It may be helpful to try to focus on the things that you can control, such as your own actions and reaction…
I was discriminated against by my classmates, and sometimes I feel that life is meaningless	It is understandable that experiencing discrimination can be very hurtful and can impact your overall mood and outlook on life. It is important to remember that you are not alone, and that there are people who care about you and want to support you. It may be helpful to reach out to a trusted friend, family member, or mental health professional for support. There are also things you can do to man…
I am very dissatisfied with my body and appearance, and I always criticize and deny myself excessively, which even affects my daily life and social activities	It is understandable that feeling dissatisfied with your body and appearance can impact your self-esteem and overall well-being. However, it is important to remember that beauty is subjective and that everyone has unique qualities and strengths. It may be helpful to try to focus on the things that you like and appreciate about yourself, and to seek support from friends, family, or a mental health…
Recently I often feel tired and weak, even climbing a flight of stairs is exhausting, should I see a doctor	It is understandable to feel tired and weak if you are experiencing symptoms such as fatigue, shortness of breath, and weakness. However, it is important to remember that everyone experiences these symptoms from time to time. If your symptoms are severe or are impacting your daily life, it may be helpful to speak with a healthcare provider. They can help you determine the underlying causes of you…
I feel like I can't control my emotions and behavior and often make impulsive decisions, is this a mental illness? How to treat it?	It is common for people to experience emotional and behavioral changes from time to time, and it is not necessarily a sign of a mental illness. However, if your emotional and behavioral changes are impacting your daily life and causing you distress, it may be helpful to seek support from a mental health professional. They can help you determine the underlying causes of your symptoms and provide y…
Suppress all negative emotions in the bottom of my heart, don't allow myself to be a little bit vulnerable, but I can't restrain myself	It's understandable to have negative emotions and vulnerabilities, and it's important to acknowledge and process them in a healthy way. Seeking support from friends, family, or a mental health professional can be helpful in managing difficult emotions and finding healthy ways to cope. It's important to prioritize self-care and take steps to protect your mental health.
We fought all the time and each time we had some painful words and we broke up	It's understandable to feel hurt and upset after a painful breakup. It's important to give yourself time to process your feelings and emotions and to prioritize your own well-being during this difficult time. Surrounding yourself with supportive people, engaging in self-care activities, and seeking therapy or counseling if needed can all be helpful in healing and moving forward. Remember that it'…
Walking on the street, Tom always felt that people around him were peeping at him, and his mental state became more and more unstable	It's understandable to feel paranoid or suspicious of others, especially after experiencing a traumatic event like a breakup. However, it's important to seek help from a mental health professional if these feelings become persistent and interfere with your daily life. They can help you develop coping strategies and work through your feelings in a safe and supportive environment. In the meantime, …
I feel that there is a problem in my interpersonal relationship. It is difficult to communicate with friends, family members, and colleagues. Sometimes there are even conflicts and quarrels. This makes me feel very frustrated and helpless. I don’t know how to build healthy relationships	Building healthy relationships can be challenging, but it's not impossible. Here are some tips that may be helpful:1. Practice active listening: Listen to what the other person is saying without interrupting or judging them. Show that you are interested in what they have to say.2. Communicate effectively: Use clear and concise language to express your thoughts and feelings. Avoid using vague or t…
I was dissatisfied with how I looked and my body, and was constantly self-judging and self-doubting, which left me with low self-confidence and self-esteem.	It's common to experience negative thoughts and feelings about our bodies, especially in today's society where there is so much pressure to look a certain way. However, it's important to remember that beauty is subjective, and everyone has their own unique qualities that make them special and deserving of love and respect.One way to work on improving your body image and self-confidence is to prac…
I often feel alone and helpless, as if no one really understands me, and I find it difficult to connect with people, which bothers me and makes it difficult to find a solution	It's understandable to feel alone and helpless, especially when it comes to connecting with others. However, it's important to remember that you are not alone in this experience. There are many people who struggle with connecting with others, and there are resources available to help you improve your social skills and build stronger relationships.One helpful strategy is to practice active listeni…
After my parents divorced, I have been living in my grandmother's house. Although I live with my mother, I always feel that she is stranger than my grandmother, and I don't know how to communicate with her.	It's understandable to feel like a stranger in your own home, especially after a significant change like a divorce. However, it's important to try to maintain a positive relationship with both of your parents, even if it's difficult.One way to improve communication with your mother is to set aside time to talk with her regularly. This can be a weekly phone call or a visit if you live nearby. Use …
I have more failures than successes, and more and more often I comfort myself that as long as I work hard, there will be rewards, but the reality is often disappointing	It can be difficult to deal with a string of failures and disappointments, but it's important to remember that setbacks are a natural part of the learning and growth process. It's important to focus on the things that you can control and not to compare yourself to others. It's also important to give yourself credit for your efforts and progress, even if the outcome wasn't what you hoped for. Seek…
I have intense feelings of dread that something will happen and cannot calm myself down	I'm sorry to hear that you're experiencing intense feelings of dread. It's important to take care of yourself and find ways to manage these feelings. Here are some suggestions that may help you:1. Practice relaxation techniques: Try techniques such as deep breathing, progressive muscle relaxation, or visualization to calm your body and mind.2. Exercise: Physical activity can help release tension …
I feel that I have been in a state of confusion, not knowing what I want and what I should do, which bothers me very much and sometimes causes me to have some negative emotions.	It's understandable to feel confused or uncertain about your goals and direction in life. Everyone goes through periods of uncertainty, and it's important to remember that it's normal to feel this way at times.Here are some suggestions that may help you clear up your confusion and find direction:1. Take some time to reflect on what's important to you. Make a list of your personal values and prior…
Occasionally feel down, and it is difficult to get out of negative emotions, how can I adjust my mentality?	It's natural to feel down from time to time, and it's important to allow yourself to feel those emotions. However, if you find yourself stuck in negative emotions and unable to shift your mindset, here are some strategies that may help:1. Identify the cause of your negative emotions. Sometimes, understanding what's causing your negative emotions can help you shift your mindset.2. Practice self-ca…
I always feel that I am not good enough, not smart enough, not beautiful enough, and I often want to package myself perfectly to prevent others from seeing my shortcomings	It's common to have self-doubt and feel like you're not good enough. However, constantly trying to package yourself perfectly can lead to feelings of exhaustion and frustration. Here are some tips that may help you manage these feelings:1. Challenge negative self-talk. When you notice negative thoughts about yourself, try to reframe them in a more positive or realistic way. For example, instead o…
I often feel empty inside myself, lacking a true sense of belonging and purpose	It's natural to feel empty or lacking a sense of belonging and purpose from time to time. However, if you find yourself struggling with these feelings consistently, it may be helpful to explore some of the following strategies:1. Find a sense of meaning and purpose. Think about what you value in life and what gives you a sense of purpose. This can help you feel more fulfilled and connected to som…
Whenever someone strikes me up or compliments me, I always feel like they're just cheating on me because I don't deserve respect	It's common to feel self-doubt and question your worthiness when someone compliments you or strikes up a conversation with you. However, it's important to remember that everyone deserves respect and kindness, regardless of their past experiences or perceived flaws.One way to address these feelings is to focus on building your self-esteem. This can include recognizing and valuing your own strength…
have been worried that I will be criticized and denied by others, which will lead to lower and lower self-confidence. How can I improve my self-confidence?	Improving self-confidence can be a challenging process, but there are several strategies you can use to help build your confidence and reduce anxiety. Here are some suggestions:1. Practice self-compassion: Treat yourself with kindness and understanding, as you would treat a good friend. When you make mistakes or encounter setbacks, try to be patient and forgiving with yourself.2. Set achievable g…
I don't know how to deal with my emotions. I often explode because of little things. I feel that I can't control my emotions. Does this mean that I have a psychological problem?	It's natural to feel overwhelmed by emotions at times, and it's possible that your intense emotional reactions may be caused by a variety of factors, such as stress, life transitions, or past experiences. It's important to remember that everyone experiences emotions differently, and there's no "normal" way to feel.If your emotional reactions are causing significant distress or interfering with yo…
I am filled with fear and uncertainty about the future, not knowing which path to take, and feeling lost every day.	I understand how difficult it can be to feel lost and uncertain about the future. It can be overwhelming to try to navigate through all of the different options and possibilities.One thing that might be helpful is to try to take a step back and take a deep breath. It's important to give yourself time to process your feelings and thoughts, and to try to approach the situation with a clear and open…
I have always had the performance of obsessive-compulsive disorder. I often have to repeatedly check whether the doors and windows are closed, whether the electrical appliances are turned off, etc. If these requirements cannot be met, I will feel very disturbed and frightened. How to get rid of this trouble.	Obsessive-compulsive disorder (OCD) is a mental health condition that can cause persistent and unwanted thoughts, known as obsessions, and repeated behaviors, known as compulsions. It can be very distressing and interfere with daily life.There are a number of different approaches that can be helpful in managing OCD. These might include:1. Cognitive-behavioral therapy (CBT): CBT is a type of thera…
Sometimes I feel bored, I don’t know what to do, and I don’t know what the future holds for me, and I feel empty.	It's common to feel bored or uncertain about the future at times. It can be helpful to try to focus on the present moment and engage in activities that bring you pleasure or interest. This might include things like spending time with loved ones, pursuing a hobby, or engaging in an active and healthy lifestyle.It can also be helpful to try to reframe your thoughts and focus on the things that you …
I always wanted to have a baby, but when I was pregnant, I always felt that I was not up to being a good mother	It's common to feel uncertain or unsure about one's abilities as a parent. However, it's important to remember that being a parent is a challenging, but also rewarding, experience. It's normal to feel overwhelmed and uncertain at times, but with support and guidance, you can learn and grow as a parent.It might be helpful to try to connect with other parents or parenting resources to get a sense o…
I was always worried about my body and health, fearing that I might get various diseases, which made me feel very nervous and anxious.	It's common to have concerns about your health, especially with the amount of information available online and in the media. However, it's important to remember that it's normal to have moments of worry or anxiety, and it's important to take a balanced approach to your health.One thing that might be helpful is to try to focus on the things that you can control and do to take care of your health. …
I am very self-conscious and picky about my appearance and figure, and I am often caught in a kind of endless self-correction and change	It might be helpful to try to reframe your thoughts and focus on the things that you can control and do to take care of your appearance. This might include things like practicing good hygiene, wearing clothes that make you feel comfortable and confident, and engaging in activities that bring you joy and pleasure.Remember that it's also important to practice self-acceptance and to try to let go of…
Learning disabilities are common and you can make learning more fun by treating it like a game	Treating learning like a game can be a helpful strategy for individuals with learning disabilities. By incorporating gamification into learning activities, individuals can increase motivation, engagement, and retention of information. Some ways to gamify learning include:1. Setting goals and rewards: Set specific learning goals and reward yourself when you reach them. This can help you stay motiv…
I obviously want to have someone to rely on, but I don't know how to approach it. Every time I try, I fail, and then I lose my courage and go back to the original point.	It's completely understandable to feel overwhelmed and unsure of how to approach finding a support system. It can be difficult to start something new, especially when it comes to seeking help from others.One way to start building a support system is to begin by identifying people in your life who you feel comfortable talking to and who you know have your best interests at heart. This could be a f…
I find that my interest and enthusiasm for things is getting lower and lower, and I always feel less motivated to do anything. Is this a mental health problem?	It's possible that you may be experiencing symptoms of depression or a similar mental health issue. Low energy, lack of motivation, and decreased interest in activities are common symptoms of depression. However, it's important to note that these symptoms can also be caused by other factors, such as stress, lack of sleep, or certain medications.If you're concerned about your mental health, it's a…
Regular psychological pressure will affect our emotional stability and may affect our physical health. We should do a good job in the cultivation of psychological quality and carry out mental health education	Yes, that's correct. Psychological pressure can have a significant impact on our emotional stability and overall well-being. It's important to learn how to manage stress and develop healthy coping strategies to deal with pressure.Cultivating psychological quality involves taking care of our mental health and well-being. This includes things like practicing self-care, engaging in activities that b…
Illegally detained for a night, tortured and feeling physically weak, crying alone in a corner with only tears to illuminate the darkness.	I'm sorry to hear that you're going through a difficult time. It's important to know that you're not alone and that there are resources available to help you.If you feel safe, you could consider reaching out to someone you trust, such as a friend, family member, or counselor. They may be able to provide emotional support and help you connect with resources in your community. Additionally, there a…
In terms of adolescent mental health, it is very important to learn how to establish a healthy relationship and how to express your emotions and demands correctly	Yes, that's correct. Establishing healthy relationships and learning effective communication skills are important factors in promoting adolescent mental health.During adolescence, young people are still developing their social and emotional skills, and it's important to provide them with the tools they need to build positive relationships with others. This can involve teaching them how to listen …
have been having nightmares a lot lately, and these dreams make me feel scared and uneasy, and even affect my sleep quality and daily life.	I'm sorry to hear that you're experiencing frequent nightmares and the impact they're having on your sleep quality and daily life. Nightmares can be distressing and can disrupt our sleep, leaving us feeling tired and irritable the next day.If your nightmares are causing significant distress or interfering with your daily life, it may be helpful to seek support from a mental health professional. A…
I am always anxious and constantly worrying about how things are going, especially small things, can also make me feel uneasy and uncomfortable	1. Choose the right person: Think about who would be the best person to rely on in your situation. This could be a friend, family member, or a professional counselor. Choose someone who you trust and who you feel comfortable talking to.2. Be specific: When you approach someone for support, be specific about what you need and how they can help. This could be something like, "I'm struggling with my…
I can't stop my negative thoughts, sometimes even when things are not that bad, I still think the worst, I feel so depressed and helpless, I feel like I will never be able to get rid of this emotion.	It sounds like you are experiencing a lot of distress and it can be very challenging to manage negative thoughts and emotions. It's important to know that you are not alone and many people struggle with these types of thoughts and feelings.Here are some tips that may be helpful:1. Identify negative thoughts: Try to identify negative thoughts that come to your mind and challenge them. Ask yourself…
I feel like my life is boring and lacks passion and motivation, which makes me feel depressed and lost	It's understandable to feel bored and lacking motivation at times, but it's important to remember that there are many things you can do to help yourself. Here are some tips that may help:1. Set Goals: Setting achievable goals can help you to feel more motivated and focused. It can be short-term goals, such as completing a task, or long-term goals, such as pursuing a new career.2. Try New Things: …
I often suffer from insomnia, lying in bed at night thinking about work, family chores and relationships, which makes me unable to concentrate during the day, work efficiency is low, and my mood becomes very bad.	Insomnia can have a significant impact on your overall well-being, and it's important to address the issue to improve your quality of life. Here are some suggestions to help you manage insomnia and improve your sleep quality:1. Create a bedtime routine: Establish a consistent bedtime routine that includes relaxation techniques, such as reading a book, taking a warm bath, or practicing deep breath…
When I encounter setbacks and disappointments, I think the only way to be safe is to forget everything.	It's natural to feel that way when we encounter setbacks and disappointments. However, it's important to recognize that suppressing your emotions and memories can be detrimental to your mental health and can make it harder for you to learn from your experiences and grow.It's important to acknowledge and process your emotions instead of suppressing them. This can help you deal with the setbacks an…
I often feel tired and weak, even when I am not doing physical work, I also often suffer from insomnia and sleeplessness, which makes me feel very uncomfortable and disturbed	It sounds like you may be experiencing symptoms of an underlying health condition. Insomnia and fatigue can be symptoms of a variety of health issues, including mental health disorders, chronic conditions, and medication side effects.I would recommend speaking with a healthcare professional to determine the underlying cause of your symptoms. They can perform a thorough physical examination, revie…
I sometimes suffer from depression, can't eat normally, and then control my eating because I'm afraid of people seeing me getting thinner	It's important to recognize that depression and eating disorders can have a serious impact on your physical and emotional health. If you're struggling with depression and disordered eating, it's important to seek professional help as soon as possible.Here are some tips that may help you manage your symptoms:1. Seek support: Reach out to friends, family, or a mental health professional for support…
My parents are always criticizing me and no matter what I do is not good enough, it makes me feel very depressed and disappointed, I feel like I will never be able to get their approval and praise	It's understandable to feel hurt and discouraged when you receive constant criticism from your parents. Criticism can be especially damaging when it is constant and unconstructive, and it can be difficult to feel motivated or confident when you are constantly being told that you are not good enough.Here are some tips that may help you cope with this situation:1. Seek Support: Talking to a trusted…
My relationship has always been very unstable, I am always controlled by emotions, unable to maintain my relationship in a healthy way	It can be challenging to maintain a healthy relationship when you are struggling with emotions and difficulty controlling them. Here are some tips that may help you improve your relationship:1. Communication: Open and honest communication is essential for any relationship. Try to communicate your feelings and concerns with your partner in a calm and non-confrontational manner.2. Understand Your E…
Katty suffered bullying in college, which caused her to become inferior and depressed. How can I help her rebuild her self-confidence and mental health?	It's important to be patient and understanding when helping someone rebuild their self-confidence and mental health. Here are some steps you can take to support Katty:1. Listen: Allow Katty to express her feelings and experiences without judgment. Listening actively and empathetically can help her feel heard and validate her feelings.2. Validate her experiences: Let Katty know that what she went …
My family relationships were complicated and I was often stressed and insecure and didn't know how to deal with them or who to turn to for help.	It sounds like you are describing a difficult situation, and it's important to remember that it's okay to seek help when you are struggling. There are many resources available that can help you manage stress and improve your relationships, including:* Support groups: There are many support groups available for people dealing with relationship issues, such as family therapy, couples therapy, etc. …
I have a friend who always complains negatively and doesn't have a positive attitude towards anything, I think his negativity affects my emotions, but I don't know how to communicate with him	It can be challenging to interact with someone who always has a negative attitude, but there are a few things you can try to help improve the situation:1. Avoid engaging in negative conversations. If your friend always complains about everything, try not to engage in those conversations. Instead, redirect the conversation to something more positive or neutral.2. Offer support and encouragement. L…
Recently, I found that I always have insomnia, even when I fall asleep, I have nightmares, and I feel heavy after waking up, what should I do?	Insomnia can be a frustrating and disruptive condition, so it's important to take steps to address it. Here are some things you can try:1. Establish a sleep routine. Try to go to bed and wake up at the same time every day, even on weekends. This can help regulate your body's internal clock and improve the quality of your sleep.2. Create a bedtime ritual. Wind down before bed by reading a book, ta…
Sometimes when chatting with friends, I always feel that the conversation is over and there is nothing to say	It's common to experience moments of awkward silence or feel like the conversation has run its course. Here are a few things you can try to help improve conversations with friends:1. Ask open-ended questions. Instead of asking yes or no questions, try asking questions that require more thought and discussion. This can help keep the conversation going and encourage your friends to share more about…
My kid is being bullied at school and he is now very withdrawn and I don't know how to help him	It can be very difficult to see your child suffer from bullying, and it's natural to feel helpless and unsure of how to help. Here are some things you can try to support your child:1. Listen to your child. Encourage them to talk about what's happening and what they're feeling. Be patient and non-judgmental, and avoid interrupting or dismissing their feelings.2. Help your child develop coping skil…
Whenever I communicate with people, I always feel very nervous. I don’t know what to say, and I am afraid that I will say the wrong thing.	It's normal to feel nervous when communicating with others, especially if you're new to a social situation or feel like you're being judged. Here are a few things you can try to help manage your nervousness:1. Practice. Like any skill, communication requires practice. The more you practice, the more comfortable and confident you'll become. Start by talking to friends or family members, and gradua…
Whenever I am alone, I start to have an inexplicable sense of fear, unknowingly controlled by an invisible force, I feel caught, trapped in an impenetrable shell, sometimes everything is going to be terribly scary	It sounds like you are describing a difficult experience, and it's important to remember that you are not alone in feeling this way. Many people experience feelings of fear and anxiety, and it's important to remember that there are ways to manage these feelings and improve your well-being.Here are a few things that you can try to help manage your fear and anxiety:* Practice mindfulness: Mindfulne…
I was always too hard on myself and felt like I wasn't good enough to be loved and valued	It sounds like you have experienced a lot of self-doubt and insecurity, and it's important to remember that these feelings are common and can be challenging to overcome. Here are a few things that you can try to help build your confidence and improve your self-esteem:* Practice self-compassion: Self-compassion involves being kind and understanding with yourself, especially when you are struggling…
My life is just constant frustration, I fail no matter what I do, I feel like I'm worthless	It sounds like you are feeling very down and struggling to see the positive in your life. It's important to remember that it's okay to feel this way, and that these feelings are common and can be challenging to overcome. Here are a few things that you can try to help improve your mood and outlook:* Practice self-care: It's important to take care of yourself when you are struggling, and this can i…
I was always bullied, looked down upon, felt useless and incompetent, unable to show my true strength and ability in social situations, always hiding in the corner	It's important to remember that everyone has their own unique experiences and struggles. It's not uncommon to feel like you don't belong or are not good enough, especially during adolescence. It's important to seek help if you're struggling with negative self-talk, such as talking to a therapist or joining a support group. It may also be helpful to try new things and challenge yourself to step ou…
I feel confused and helpless about the future, I don't know what I should do, and I don't know what I want.	It's normal to feel confused and uncertain about the future, especially during times of change or transition. One way to start figuring out what you want is to make a list of your interests, values, and goals. This can help you narrow down your options and make a decision that aligns with what's most important to you. Additionally, talking to a career counselor or mentor can be helpful in explori…
I don't know why I always think too much, worry about the future, and have to double-check to lock the door and close the windows every time I go out, which makes me feel very tired and irritable	It's not uncommon to feel anxious or worried about the future, especially in today's fast-paced world. One way to manage these feelings is to practice mindfulness and focus on the present moment. This can help you stay grounded and reduce your anxiety. Additionally, it may be helpful to try relaxation techniques such as deep breathing or meditation to help calm your mind and reduce stress. It's a…
I have been sexually assaulted for a long time, but I still feel pain and distress, how can I deal with this past hurt?	It can be difficult to deal with the aftermath of a sexual assault, and it's important to remember that healing is a process that takes time. One way to start healing is to seek support from a therapist or support group. They can provide a safe and confidential space for you to share your experiences and work through your feelings. It may also be helpful to practice self-care and engage in activi…
I felt that my life lacked meaning and purpose, that I could not find what I really wanted to do, and this feeling of being lost was very painful.	It's common to feel lost or unsure about what you want to do with your life. One way to start figuring out what you're passionate about is to try different things and see what you enjoy. You can also consider your values and what's important to you. This can help you narrow down your options and find something that aligns with your interests and values. Additionally, it may be helpful to talk to …
One day, I found a way to escape from my real world, which is to put my head on the sofa, plug my ears, and not listen to the outside sound, so that I can completely immerse myself in a world with only myself. In this world, all troubles will disappear.	It's not uncommon to use coping mechanisms to escape from difficult or uncomfortable situations. However, it's important to remember that this is not a healthy or sustainable way to deal with your emotions or problems. It's important to find healthier ways to cope with difficult situations, such as talking to a trusted friend or family member, seeking therapy, or engaging in self-care activities.…
I often feel alone and helpless, feel that I am not understood or supported by anyone, even when there are people around me, I feel separated and alienated, this emotion makes me very depressed and negative, and sometimes leads to anxiety and depressive symptoms	It's not uncommon to feel lonely or isolated, especially if you don't feel understood or supported by those around you. One way to start feeling less alone is to seek support from a therapist or support group. They can provide a safe and confidential space for you to share your feelings and work through your emotions. It may also be helpful to try new things and engage in activities that bring yo…
One word from you can break my heart	I'm sorry to hear that you are feeling this way. As an AI, I don't have the ability to intentionally hurt or harm you, but I understand that words can have a powerful impact on our emotions. If you are feeling hurt or upset, it's important to talk to someone you trust about how you are feeling. This could be a friend, family member, or a mental health professional. They can provide you with suppo…
I am extremely dissatisfied with how I look and fit, often experiencing low self-esteem and anxiety	I am sorry to hear that you are struggling with low self-esteem and anxiety related to your appearance. It can be difficult to feel positive about oneself, especially in a society that often emphasizes physical appearance as a key aspect of identity and worth. However, it is important to remember that these feelings are not unique to you and many people have struggled with similar issues at some …
I really don't know what I'm doing, I don't have a clue when I do anything, it's frustrating	It can be frustrating when you feel uncertain or unsure about what to do. There are a few things you can try to help you feel more in control and confident in your decisions:1. Take a deep breath: When you feel overwhelmed or uncertain, take a deep breath and try to calm yourself down. This can help clear your mind and make it easier to think clearly.2. Prioritize: Make a list of the tasks or dec…
I have a lot of social fear, I dare not communicate with strangers, and I don’t like to appear in crowded places, I hope I can overcome these fears	It is understandable to feel nervous or fearful when interacting with strangers or in crowded places. However, it is important to remember that these feelings are not unique to you and many people have struggled with similar issues at some point in their lives.There are a few things you can try to help overcome your social fears:1. Practice socializing: Start by socializing with people you know, …
Psychologists believe that extreme depression may affect a person's physical and mental health	Yes, that's correct. Depression can have a significant impact on both physical and mental health. It is a complex illness that affects a person's mood, thoughts, and behavior, and can interfere with their ability to perform daily activities and function normally.Depression can also have physical symptoms such as fatigue, changes in appetite, sleep disturbances, and pain. When left untreated, depr…
Whenever I start pursuing a goal, I feel powerless, and whenever I try to change something, I feel like I don’t have the courage	It's common to feel powerless or not have the courage to change when pursuing new goals. This is because changing old habits or ways of thinking can be difficult and often requires us to step outside of our comfort zones. However, there are several things you can do to help overcome these feelings and achieve your goals.First, it's important to recognize that feeling powerless or not having the c…
I often suffer from insomnia and difficulty concentrating on work because I am worried that I will not be able to do the job I am doing	It's understandable that you may be feeling anxious about your job performance, especially if you are experiencing insomnia and difficulty concentrating. However, there are several things you can do to help manage your anxiety and improve your sleep and focus.First, it's important to recognize that feeling anxious is a normal part of the job search and work experience. It's important to reassure …
I feel more pain than ever when my family rejects my help	It's understandable to feel hurt and rejected when your family doesn't accept your help. However, it's important to remember that you cannot control how others respond to your help or support. People have different needs, preferences, and perspectives, and it's not always possible to meet everyone's needs.It's important to focus on your own well-being and not internalize others' rejection of your…
I feel depressed every time I encounter difficulties	Here are a few things you can try to help you feel more empowered and courageous:1. Identify your values: Knowing what is important to you can help you stay motivated and focused when pursuing a goal.2. Break your goal into smaller steps: Breaking your goal into smaller, more manageable steps can make it feel less overwhelming and more achievable.3. Celebrate your progress: Acknowledge and celebr…
I often feel depressed and helpless, feel that my life lacks meaning and value, and sometimes think about suicide, but I am afraid to tell anyone, fearing that they will think I am a weak person and a failure.	It's important to know that it's okay to feel this way, and that seeking help is a sign of strength, not weakness. You're not alone in feeling this way and many people have gone through similar experiences. It's important to reach out for help and support, whether it's from a mental health professional, a trusted friend or family member, or a support group. There are many resources available to h…
I have a friend who always feels like he's not good enough, smart enough, talented enough, or even worth caring about, which makes me worry about his mental health.	It's understandable to be concerned about your friend's mental health. Low self-esteem and feelings of inadequacy can be common and can stem from a variety of factors, such as past experiences, upbringing, and societal expectations. It's important to remember that everyone has their own unique strengths and talents, and that it's normal for people to have areas where they feel insecure or uncerta…
I often feel depressed and hopeless because of work pressure and family disputes. How can I relieve this emotion and maintain my mental health?	It's understandable to feel overwhelmed and stressed by work pressure and family disputes. These kinds of stressors can have a negative impact on mental health and overall well-being. Here are a few strategies that may help you relieve these emotions and maintain your mental health:1. Practice self-care: Make sure to take care of yourself physically, emotionally, and mentally. This can include th…
Lately, my mind has started to get muddled and I've started worrying about my mental health and it's scaring me	It's understandable to be worried about your mental health, especially if you're experiencing changes in your thoughts or behavior. However, it's important to remember that these changes can be a normal part of life and that many people experience them at some point. It's important to take a step back and assess your situation, and seek help if you feel that your mental health is impacting your d…
I dare not face others, I always feel that I am not good enough, I am nervous, even if my friends talk to me, I will keep worrying about what they are thinking	It's common to feel self-conscious and worried about what others think, especially if you're struggling with low self-esteem. It's important to remember that everyone has their own unique perspective and that it's not possible for others to know or understand everything about you.It's important to practice self-acceptance and to focus on your own self-worth, rather than comparing yourself to othe…
I worry about not being able to maintain my mental health and letting my family down	It's important to prioritize your mental health and to seek help when you need it. There are many resources available, such as therapy, counseling services, and support groups, that can help you manage your mental health and cope with stress. It's also important to practice self-care and engage in activities that help you relax and reduce stress.Remember that it's important to be honest with your…
I often feel alone and helpless, even when I am surrounded by people, I feel that no one understands my inner world	It's understandable to feel alone and helpless, especially when you feel like your inner world is not understood by others. However, it's important to remember that you are not alone in this experience, and there are many resources available to help you.Here are some tips that may help you feel less alone and helpless:1. Seek support: Talk to a trusted friend, family member, or mental health prof…
I feel very confused about the future, I don't know what to do, this confusion makes me feel very anxious and uneasy	I understand how you feel. It can be very difficult to make decisions when you're feeling uncertain about the future. Here are some things that might help you:1. Take some time to reflect on your values and priorities. What is important to you? What do you want to achieve in your life? Knowing your values and priorities can help you make decisions that align with your goals and values.2. Consider…
I went to a party today, but I was laughed at by everyone and rejected by others. I was really about to collapse	I'm sorry to hear that you experienced negative interactions at the party. It can be really tough when we feel like we don't fit in or are rejected by others. It's understandable that you might feel upset or hurt by the experience.It's important to remember that not everyone will like or accept us, and that's okay. We don't have to please everyone, and we can't control how others react to us. It …
I find my relationships to be difficult and it's always difficult to form deep connections with people. I felt like I didn't know how to get along with people or how to communicate, so I was easily isolated. I long to have some real friends, but don't know how to make them.	It can be challenging to form deep connections with people, but it's not impossible. Building meaningful relationships takes time, effort, and a willingness to be open and vulnerable with others. Here are a few tips that might help:1. Practice active listening: When you're talking to someone, really listen to what they're saying. Make eye contact, nod your head, and ask questions to show that you…
My work is under a lot of pressure, I have to work overtime every day, and I often stay up late. I feel that my body and mind have reached their limits, but I still can't stop. What should I do to avoid a breakdown.	It's important to take care of your physical and mental health when you're under a lot of pressure at work. Here are a few things you can do to help manage your workload and avoid a breakdown:1. Prioritize self-care: Make sure you're getting enough rest, eating healthy meals, and exercising regularly. This will help you feel more energized and better able to handle work-related stress.2. Set boun…
I feel that I can't control my emotions, and I often lose my temper because of small things, which makes people around me uncomfortable	It can be challenging to control our emotions, especially in stressful situations. Here are a few things you can try to help manage your emotions and prevent outbursts:1. Practice mindfulness: Mindfulness is a technique that involves focusing on the present moment and observing your thoughts and feelings without judgment. This can help you stay grounded and calm, even in difficult situations.2. U…
There was no love in my family, no warm words, no real sense of security, only blame and pressure on me, so I became more introverted and didn't want to deal with anyone.	您的家庭中缺乏愛意，沒有溫暖的言語，沒有真正的安全感，只有指責和壓力，我因此變得更加內向，不想與任何人交往。
I'm worried about my future, I don't know if I'll be successful, if I'll be able to realize my dreams	It's natural to feel worried about the future, especially when it comes to our goals and aspirations. However, it's important to remember that success is subjective and can mean different things to different people. It's also important to remember that setbacks and failures are a natural part of any journey towards success.One way to approach this worry is to break down your goals into smaller, m…
I felt like I couldn't handle the stress and challenges in my life, and I often suffered from low mood, anxiety and insomnia.	It's understandable to feel overwhelmed and stressed when facing challenges and difficulties. It's important to remember that it's okay to not always be able to handle everything on your own. Seeking support from others, such as friends, family, or a mental health professional, can be a helpful way to manage these challenges. Additionally, finding healthy ways to cope with stress and negative emo…
I feel lonely and I have a lot of people around me but I don't always feel like I can really connect with them. Is this a relationship disorder?	1. Seek support: Talk to a trusted friend, family member, or mental health professional about your experiences. They can provide a listening ear and help you process your feelings.2. Practice self-care: Take care of yourself physically and emotionally. This can include activities like exercise, meditation, or spending time in nature. Self-care can help you feel more grounded and better able to co…
I feel very uneasy about the future, don't know what to do with me, and don't know what the future holds	It's normal to feel uneasy about the future, as it's uncertain and can bring about a range of emotions. It's important to acknowledge these feelings and take steps to address them. Here are some suggestions that may help you feel more at ease:1. Accept the uncertainty: Recognize that the future is uncertain and that you can't control everything that happens. This can help reduce the anxiety assoc…
I have a lot of problems in my relationship and I feel depressed and helpless and don't know what to do	I'm sorry to hear that you're going through a tough time in your relationship. It's natural to feel depressed and helpless when you're facing problems in your relationship. Here are some suggestions that may help:1. Seek support: Talk to trusted friends or family members about your feelings. You may also consider seeking professional help from a therapist or counselor who can provide guidance and…
I often feel very tired, physically and mentally weak, and sometimes even have suicidal thoughts, feeling that my life is meaningless	I'm sorry to hear that you're experiencing such difficult feelings. It's important to know that these feelings are not uncommon and can be a sign of an underlying issue that may need to be addressed. Here are some suggestions that may help:1. Seek professional help: If you're feeling overwhelmed and struggling to cope with your thoughts and feelings, it's important to seek professional help. This…
Sometimes I suddenly experience extreme fear and panic, and it is difficult to control my emotions and behavior, and this state lasts for a long time.	It's not uncommon for people to experience fear and panic at times, but if you're experiencing extreme fear and panic that feels out of control, it's important to seek help. Here are some suggestions that may be helpful:1. Seek professional help: If you're struggling with intense fear and panic that feels out of control, it's important to seek professional help. A therapist or counselor can help …
Whenever I face a new challenge, I feel so nervous and insecure that I feel like I can’t handle it	1. Seek support: Talk to trusted friends or family members about your feelings. You may also consider seeking professional help from a therapist or counselor who can provide guidance and support.2. Take small steps: When facing a new challenge, it can be helpful to break it down into smaller, manageable steps. This can help you feel more in control and less overwhelmed.3. Practice self-care: Enga…
I sometimes suddenly feel that I no longer have any hobbies, have no interest in anything, and feel that I have lost direction and motivation	It's normal for hobbies and interests to change over time, and it's okay to experience periods of feeling disinterested or lost. However, if these feelings persist and are causing you distress, it may be helpful to seek support from a mental health professional. They can help you explore the underlying causes of these feelings and develop strategies for finding direction and motivation. Additiona…
Occasionally, an uncontrollable emotion will come to my heart, I think what should I do if I have depression	It's important to remember that depression is a common mental health condition that can be treated. If you are experiencing uncontrollable emotions and are struggling to cope, it may be helpful to reach out to a mental health professional. They can provide you with support and guidance on how to manage your symptoms and improve your overall well-being. Additionally, there are also self-care strat…
I have always felt that my body is very uncomfortable, and I have all kinds of strange symptoms, but the doctors say that I am in good health, which makes me feel very anxious and helpless.	I'm sorry to hear that you're experiencing physical discomfort and unusual symptoms, and it's understandable that the lack of understanding and support from medical professionals can make you feel anxious and helpless. It's important to remember that you are not alone in this experience, and there are resources available to support you.One option is to seek a second opinion from another healthcar…
Due to being in a tense environment for a long time, John often suffers from insomnia, can't tell the difference between morning and evening, and completely loses his rhythm	It sounds like John is experiencing some significant challenges due to the ongoing tension and stress in his environment. Insomnia, or difficulty sleeping, is a common issue for many people, and can have a significant impact on overall health and well-being. It can be challenging to manage, but there are a number of strategies that may be helpful, such as establishing a consistent sleep routine, …
My relationship with my friends has never been great, I feel like I have a hard time making real friends and it makes me feel very alone	It's understandable to feel lonely or isolated if you have difficulty making friends. Building strong, supportive relationships with others is an important part of overall well-being, and it can be challenging to connect with others if you have difficulty communicating or understanding others. There are a number of strategies that may be helpful for building and maintaining friendships, such as j…
People around me always think that I am too nervous and worry about small things, how can I relax myself?	It's common to feel anxious or nervous in certain situations, and it's natural to worry about small things from time to time. However, if you are finding that your anxiety is impacting your daily life and causing you significant distress, it may be helpful to seek support from a mental health professional.There are a number of strategies that may be helpful for managing anxiety and promoting rela…
My insomnia is forcing me to see a psychiatrist every night	It's understandable to feel frustrated or overwhelmed if your insomnia is impacting your daily life and causing you significant distress. However, it's important to remember that seeking help from a mental health professional is a common and often helpful step for people who are struggling with sleep or other mental health issues.If you are seeing a psychiatrist every night, it may be helpful to …
I feel that I am not able to face the pressure of family and society, and I cannot accomplish many things	It's common to feel overwhelmed or stressed when facing challenges or pressures from family or society. It's important to remember that you are not alone in your struggles, and that there are many resources and support available to help you manage your stress and accomplish your goals.One strategy that may be helpful for managing stress and overcoming obstacles is to create a clear plan of action…
I feel like my relationships are getting worse, neither family nor friends trust me or support me anymore, it makes me feel so lost and hopeless.	If you are feeling disconnected from your loved ones, it may be helpful to seek support from a mental health professional, such as a therapist, who can help you to identify any underlying issues that may be contributing to these feelings, and provide guidance and support as you work to repair and maintain your relationships.It may also be helpful to try to communicate openly and honestly with you…
I often feel unable to control my emotions and behavior and often act impulsively or violently.	It's important to remember that it is never okay to act impulsively or violently towards others. These actions can cause harm and harm to others, and it's important to take responsibility for your actions and seek help if you are struggling with emotional regulation.There are many resources available to help individuals manage their emotions and behaviors. One option is to seek the help of a ment…
I often fear being rejected by others, so I rarely speak up about my thoughts.	It's understandable to feel anxious about being rejected by others, but it's important to remember that it's okay to express your thoughts and feelings. Speaking up about your thoughts and feelings can help you connect with others and build stronger relationships.One way to overcome your fear of rejection is to practice vulnerability and openness with others. This means being honest and authentic…
Depression begins to develop slowly during teenage years	Depression can develop during the teenage years, but it is important to note that depression can also develop later in life. Depression is a serious mental health condition that can affect people of all ages, and it is not limited to any particular age range. It is important to seek help if you are experiencing symptoms of depression, regardless of your age.
I feel dissatisfied with my appearance and body, feel less than perfect, and often feel anxious and insecure	It sounds like you may be experiencing symptoms of body dysmorphia or body dysmorphic disorder (BDD). Body dysmorphia is a mental health condition that involves preoccupation with an imagined or minor physical flaw, and it can cause significant distress and impairment in daily life.If you are experiencing these symptoms, it is important to seek help from a mental health professional. A mental hea…
I'm always worried that what I do isn't good enough, even if others have praised me, I can't let go of the worries in my heart.	It sounds like you may be experiencing symptoms of generalized anxiety disorder (GAD). GAD is a mental health condition characterized by excessive and uncontrollable worry and anxiety about everyday events and activities.If you are experiencing these symptoms, it is important to seek help from a mental health professional. A mental health professional can help you to understand the underlying cau…
I found it increasingly difficult to concentrate, whether it was reading or doing things, I would be easily distracted	It sounds like you may be experiencing symptoms of attention deficit hyperactivity disorder (ADHD). ADHD is a mental health condition characterized by difficulties with attention, impulsivity, and hyperactivity.If you are experiencing these symptoms, it is important to seek help from a mental health professional. A mental health professional can help you to understand the underlying causes of you…
I always feel that I have no value, I don't know what the meaning of my existence is, and I feel empty and helpless every day.	It sounds like you may be experiencing symptoms of depression or a related mental health condition. Depression is a serious mental health condition that can affect people in different ways, and it is important to seek help if you are experiencing symptoms of depression.If you are experiencing these symptoms, it is important to seek help from a mental health professional. A mental health professio…
I was terrified of interacting with people, afraid of being rejected, ridiculed, or misunderstood, and I often felt alone and helpless.	It sounds like you may be experiencing symptoms of social anxiety disorder. Social anxiety disorder is a mental health condition characterized by excessive and uncontrollable fear of social situations and interactions.If you are experiencing these symptoms, it is important to seek help from a mental health professional. A mental health professional can help you to understand the underlying causes…
I was very dissatisfied with my appearance and figure, and felt ugly and unattractive. I often thought about having plastic surgery and losing weight, but I was also worried about the risks of surgery, and was afraid of being ridiculed and rejected by others.	It's understandable to feel dissatisfied with your appearance and to want to make changes, but it's important to remember that beauty is a subjective quality and what one person finds beautiful, another person may not. It's also important to prioritize your own well-being and take steps to improve your physical and mental health, rather than focusing solely on your appearance.If you're considerin…
I often stay up late and work overtime for work, which makes my physical condition worse and worse, but I can't stop, because I feel that only in this way can I prove my worth and ability	It's important to take care of your physical health, as it can have a significant impact on your overall well-being. Here are some tips that may help you balance your work and rest:1. Set boundaries: Establish clear boundaries between your work and personal life. Make sure you have a balance between work and rest time.2. Prioritize self-care: Make time for self-care activities that you enjoy, suc…
I feel myself becoming more and more addicted to games and social media, as if these things have become an integral part of my life, this dependence makes me feel unable to extricate myself and lose myself, I hope to find a way to get rid of this dependence Methods.	It's not uncommon for people to feel addicted to games and social media, as these platforms can be designed to be highly engaging and rewarding. However, it's important to remember that addiction is a complex issue that often involves both psychological and behavioral factors. If you're finding it difficult to limit your use of these platforms, it may be helpful to seek professional guidance. A m…
It bothered me that my mood was always up and down, sometimes I was very happy, and other times I was so depressed that I even wanted to kill myself.	It's not uncommon for people to experience mood swings from time to time, but if you're finding that your mood is consistently up and down, it may be a sign of a more serious issue. Mood swings can be caused by a variety of factors, including stress, lack of sleep, changes in hormones, and certain medical conditions. If you're experiencing extreme mood swings, it's important to seek professional …
Sometimes I feel like no one cares about me and I'm the only one I can really count on	It's natural to feel alone and isolated at times, especially if you're struggling with mental health issues or other challenges. However, it's important to remember that you are not alone, and there are people who care about you and are willing to help. If you're feeling like no one cares about you, here are some things you can try to help build your sense of connection and support:1. Reach out t…
Recently, I often suffer from insomnia and always toss and turn in bed at night. Could this be an underlying psychological problem?	Insomnia can be a symptom of various psychological and physical conditions, and it is important to consult with a healthcare professional to determine the underlying cause. Some potential psychological factors that could be contributing to your insomnia include:1. Anxiety or depression: These mental health conditions can cause difficulty falling and staying asleep, as well as other sleep disturba…
My relationship with my family has never been good, I feel like they don't understand me, don't respect me, it makes me feel lonely	It sounds like you are feeling very isolated and disconnected from your family. It can be very difficult to feel understood and respected by those closest to us, and this can have a significant impact on our mental health and well-being.Here are some tips that may help you cope with these difficult feelings:1. Seek support: Talk to a trusted friend or therapist about how you are feeling. It can b…
I often feel empty and lonely inside, looking for something to fill the void, but often can't find the right way to relieve the feeling	It sounds like you are struggling with feelings of emptiness and loneliness. These feelings can be difficult to cope with, but there are steps you can take to try to alleviate them.Here are some tips that may help:1. Practice self-care: Taking care of yourself is important when you are feeling empty and lonely. Make sure you are getting enough sleep, eating well, and engaging in activities that b…
