# Supplementary material
Source: ML conference proceedings conference paper supplement (https://openreview.net/forum?id=JL42j1BL5h)
Supplement: supplementary_material [file Mental_Health_v.xlsx]

## Sheet: Sheet1
Input	Output
我经常感到孤独和无助，没有人能够理解我，我甚至觉得自己是一个失败者，没有任何价值和意义，这种感觉让我非常沮丧和绝望，我不知道该如何摆脱它们。	很抱歉听到你感到这样，这种感觉确实是非常困难和痛苦的。我可以理解你的感受，因为我也曾经经历过类似的情况。首先，我想告诉你，你并不是一个失败者，而你的存在有意义和价值。每个人都会遇到困难和挫折，但这并不代表你就没有价值。你是一个独特的人，有着自己的经验和能力，可以为自己和他人做出贡献。其次，你可以尝试寻求支持和帮助。与家人、朋友或医生谈谈你的感受，听取他们的建议和支持，可以让你感到更舒适和稳妥。如果你感到自己无法戴措，也可以考虑寻求专业的心理咨询师的帮助，他们可以帮助你更好地理解自己的情绪和想法，并提供有效的应对策略。最后，请记住，你不是孤独和无助的人，你有人在这个世界上支持你。无论你遇到什么困难和挑战，都可以找到支持和帮助，让自己变得更加坚强和勇敢。
即使我只是去买了一包薯片，我也会担心别人会以为我这是一种吃太多的自暴自弃行为	每个人都有自己的行为和习惯，包括你也是这样的。你担心别人会以为你是一种自暴自弃的行为，可能是因为你的行为与别人的期望不符，或者是因为别人没有了解到你的情况和想法。尽管你需要注意到别人的看法和期望，但是你也应该尊重自己的需要和想法。如果你需要吃薯片，那么你应该做它。也许你需要更多的薯片，或者你需要吃薯片来缓解压力或情绪问题。同时，你也可以尝试与别人建立良好的沟通和理解，让他们了解到你的情况和想法，并且理解你的行为和需要。当然，你也应该尊重别人的看法和期望，并且寻求平衡和妥协。最后，记住，你是最好的自己，需要尊重自己的需要和想法。如果你感到困扰或者不安，可以寻求专业心理治疗师的帮助，他们可以帮助你更好地理解自己的情绪和需要，并提供有效的应对策略。
我总是感到疲惫和无力，无法集中精力去完成自己的任务，甚至无法从事自己感兴趣的事情，这让我感到很沮丧。	这种感觉确实很痛苦，但是有很多可能的原因会导致这种情况。以下是一些可能的原因和建议：1. 缺乏睡眠或者睡眠不良：睡眠是我们身体和心理健康的重要因素之一，如果你经常缺乏睡眠或者睡眠不良，你可能会感到疲惫和无力。2. 缺乏锻炼：锻炼可以帮助你提高身体的能力和精神状态，因此如果你经常没有锻炼，你可能会感到疲惫和无力。3. 缺乏饮食：如果你经常没有均衡的饮食，或者吃了过多的垃圾食品或者吸入过量的咖啡因等化学物质，你可能会感到疲惫和无力。4. 缺乏自我管理技能：自我管理是一项重要的技能，包括时间管理、压力管理、情绪管理等等。如果你缺乏这些技能，你可能会感到疲惫和无力。5. 压力过高：长期的压力可能会导致身体和心理健康问题，如疲惫和无力。建议你尝试寻求专业心理治疗师的帮助，通过认识自己的问题和
最近我总是睡不好觉，或者睡着了也会做噩梦，醒来的时候整个人都感觉非常的累和疲惫。	好的，我会尽力理解你的问题。你感觉自己睡不好，或者睡着了也会做噩梦，醒来的时候感觉非常累和疲惫。这可能是因为你的身体需要更好的休息和放松。您可以尝试以下几个方法：1. 改变床时间：尝试改变你的床时间，让自己有足够的睡眠时间。如果你现在是睡眠不足的，请尝试在睡觉时减少总时间，或者在起床时增加睡眠时间。2. 创造一个舒适的睡眠环境：确保你的卧室温暖、安静、黑暗、干净，而且没有太多的噪音、光线或电子设备。3. 减少噪音和光线：尽量减少噪音和光线，这可以帮助你更好地放松和入睡。4. 冷敷：在睡觉前冷敷可以帮助你放松身心，从而更好地入睡。5. 睡前减压：尽量避免睡前吃东西、喝东西或吸烟，这些可能会使你无法入睡。6. 做一些放松的活动：如果你感觉自己太累了
每次去看病都没有改善，而且心情还变得更差，常常病态地陷入自怨自艾	听起来您正在经历一些困难和挑战。在我们寻求帮助的过程中，有时候我们可能会感到沮丧和自责。这是正常的，因为我们希望能够找到解决问题的方法，但却遇到了挫折。但是，我建议您不要放弃，而是要坚持下去。每次去看病的时候，可以考虑向专业人士寻求帮助，如心理医生或治疗师。他们可以提供客观的建议和指导，帮助您更好地应对挑战。此外，保持良好的生活习惯，如充足的睡眠、健康的饮食和适量的运动，也有助于缓解情绪和提高心情。
我总是有种被孤立和排挤的感觉，即使在人群中也会感到孤独。	我理解这是一种令人难以接受的感觉。有时候，无论你身处何时何地，你都会感到自己是孤立的。这可能是因为你的经历或者个性特质。但是，请记住，你并不孤独，因为你有家人、朋友和其他人在你身边支持你。你也可以寻求专业人士的帮助，如心理医生或治疗师，他们可以提供专业的建议和指导，帮助你度过难关。同时，保持良好的社交生活，与他人交流和互动，也有助于缓解孤独感。
让自己沉迷于游戏，或网络是一种无形的心理压力	我理解这是一种令人难以控制的心理压力。有时候，我们可能会被游戏或网络所吸引，因为它们可以让我们暂时忘却痛苦和压力。但是，过度沉迷于游戏或网络可能会对我们的生活和健康产生负面影响。我建议您找到一种适合自己的方式来管理这种压力，如运动、冥想或与朋友聊天。如果您认为自己已经发出了过多的控制，可以寻求专业人士的帮助，如心理医生或治疗师，他们可以提供专业的建议和指导，帮助您度过难关。
最近压力太大了，每天都觉得非常焦虑，睡眠不好，头疼，心跳加速，好像随时会崩溃一样	我理解这是一种令人非常痛苦的情况。您可能需要采取一些措施来减轻压力。首先，请记住做些事情让您感到愉悦，如阅读、练习冥想或与朋友聊天。如果这些方法不起作用，您可以尝试与您的医生或眼科医生交流，他们可以提供帮助并推荐一些治疗方法，如药物治疗或视觉训练。同时，保持良好的生活习惯，如充足的睡眠、健康的饮食和适量的运动，也有助于缓解压力和改善心情。如果您感到无法独立或者需要更多的支持，请不要犹豫寻求帮助。
每次遇到困难和挫折时，我总是失去信心和动力，觉得自己无法应对	认识到这种情况并尝试改变思维方式是很重要的。以下是一些建议和方法，希望能帮助你摆脱失去信心和动力的挑战：1. 接受现实：意识到每个人都会遇到挫折和困难。不要期望自己总是处理问题的那么好，而是接受问题的存在。2. 逐步改变思维方式：当你遇到困难时，尝试改变你的思维方式。例如，当你感到沮丧时，试着转移注意力，思考可能的解决方案，并定时找到一个适当的时间去找办法。3. 学会调整心态：心态是汇聚到应对困难的关键。尝试根据需要调整自己的心态，例如，当你感到沮丧时，试着寻找一个积极的观点，例如你可以从中学到一些经验和教训。4. 接受失败：失败是成长的一部分，不要害怕失败。当你遇到挫折时，试着从中学到什么样的教训，并思考如何改进。5. 找到支持：寻找一些能帮助你保持信心和动力的人，例如朋友、家人或专业人士。与他们分
我总是担心自己做的事情不够好，我觉得自己好像一直在被别人的眼光所束缚着，这让我感到很压抑。	你的担忧和压抑感是非常普遍的情绪，很多人都会感到这样。以下是一些建议，希望能帮助你应对这种情况：1. 认识到自己的价值：你的价值不仅仅取决于别人的看法，而是你自己的价值。鼓励自己相信自己的能力和价值。2. 培养自尊心：认识到自己的价值是非常重要的，同时也要学会培养自尊心。你可以采取一些方式来培养自己的自尊心，例如：* 尝试关注自己的优点和成功，而不是缺点和失败。* 相信自己的能力，并在必要时寻求帮助和支持。* 与自己认同的人交流，分享自己的成功和成长经验。* 保持身体健康，例如锻炼和良好的作息习惯，这些都有助于提高自信心。3. 学会接受自己的不足：尽管你可能会担心自己做的事情不够好，但你还是需要接受自己的不足。接受自己的不足不代表你失去自尊心，而是意味着你可以改进和成长。4. 寻找专业帮助：如果
我总是担心自己做的每件事情是否正确，害怕别人对我有意见或批评，我经常因此陷入痛苦的自我怀疑中。	你的担忧和自我怀疑状态都是很正常的情绪，很多人都会经历这样的情绪。以下是一些建议，希望能帮助你应对这种情况：1. 认识到自己的担忧和自我怀疑状态：了解自己的情绪和行为，并意识到它们可能导致的问题。2. 学会接受不确定性：不确定性是生活的一部分，学会接受不确定性并采取应对措施可以帮助你应对不确定性。3. 培养自信心：自信心是应对挑战的重要因素，尝试培养自信心，例如：* 证明自己的能力：尝试完成一些挑战性的任务，并证明自己的能力和实力。* 接受自己的不足：学会接受自己的不足并寻找改进的方法。* 接受别人的反馈：接受别人的反馈并思考如何改进。4. 寻求专业帮助：如果你的担忧和自我怀疑状态影响到了你的日常生活和工作，那么可以考虑寻求专业帮助。心理治疗、认知行为治疗等专业方法可以帮助你应对这种情绪，并提供有效的应对��
把心事憋在心里，总感觉自己会爆炸，躲不开别人的目光	好的，我会尽力理解你的问题。你感觉自己会爆炸，躲不开别人的目光，这可能是因为你有一些心理上的压力和焦虑。您可以尝试以下几个方法：1. 找到一个安全的地方：如果你感觉自己有些紧张，可以尝试找到一个安全的地方，比如一个室内的房间，或者一个安静的地方，放松一下。2. 深呼吸：深呼吸可以帮助你放松身心，减少紧张情绪。3. 做一些放松的活动：比如听音乐、看电影、散步、读书等等，这些活动可以帮助你减轻紧张和压力。4. 找到支持：如果你感觉自己有很多压力和焦虑，可以尝试向家人、朋友或专业人士寻求支持和帮助。5. 寻求帮助：如果你感觉自己的情绪有很大的影响
我的家庭经历了一场突如其来的意外，我的父母都受到了严重的伤害，这让我感到无助和沮丧，甚至出现了抑郁症状。	我很抱歉听到这个消息。意外情况对于人们来说，尤其是对于年轻的人来说，会带来非常强烈的情感上的负担。我相信，您已经做出了很多努力，包括寻求专业的帮助和支持。
我发现自己越来越不喜欢与人交往，总是喜欢独处，没有兴趣参加社交活动或与人分享自己的生活，这种孤独感让我感到很沮丧	很抱歉听到这个消息，孤独感是一种让人感到不舒服的情况。有时候我们会因为不同的原因而感到孤独，比如失去了亲密的朋友或家人、工作压力过大、身体不适等等。如果你觉得这种孤独感影响到你的日常生活和情感健康，那么你可以尝试寻求专业的帮助，比如心理咨询或治疗。同时，你也可以尝试一些自我照顾的方法，比如增加与人交往的机会，参加社交活动或者尝试寻找自己喜欢的爱好和活动。
我有强烈的控制欲，总是想把所有事情都操控在自己手中，不允许别人干涉或插手，导致人际关系破裂	控制欲是一种常见的心理现象，可能是由于人们的心理需求、个性特点或生活经历等因素造成的。如果你的控制欲已经影响到了你的人际关系，那么你可能需要寻求专业的帮助，比如心理治疗或治疗营。治疗营可以帮助你了解自己的控制欲，并学会更加自我认知和适应性的人际关系。此外，你可以尝试一些自我照顾的方法，比如增加自我控制的技能，比如学会放宽自己的权力感，培养自己的同理心，以及学会积极接受和尊重他人的意见和建议。
我经常感到自己的思维很混乱，好像脑子里有太多的想法和声音在同时存在，让我感到很困惑和失落	这种感觉被称为“焦虑和抑郁”，它可能是由于多种原因造成的，包括身体健康问题、心理问题、生活环境等。如果你的思维混乱已经影响到了你的日常生活和情感健康，那么你可以尝试寻求专业的帮助，比如心理治疗或治疗营。治疗营可以帮助你了解自己的焦虑和抑郁，并学会更加自我认知和适应性的应对方法。此外，你可以尝试一些自我照顾的方法，比如喝水、做锻炼、唱歌或者听音乐，这些方法可以帮助你放松自己的思维，缓解焦虑和抑郁的症状。
为什么我做的每件事都会被家人批评	每个人都有不同的生活经历和背景，而家人可能有不同的期望和看法。有时候，家人可能会对你的决定和行为批评，这是因为他们可能认为你的决定或行为不符合他们的期望或看法，或者他们可能对你的决定或行为感到担忧或不安。在这种情况下，你可以尝试和家人进行坦诚的交流，听取他们的看法和意见，并分享你自己的想法和感受。如果家人对你的决定或行为有担忧或不安，你可以尝试解释一下你的决定或行为的背景和原因，以及你认为会发生的后果。如果家人仍然不理解或不同意你的决定或行为，你可以尝试寻找其他的解决方案，比如寻求第三方的意见或建议，或者在必要时寻求专业的帮助和支持。另外，你也可以考虑自我反思和自我探索，了解自己的价值观和人生目标，并尝试在自己的生活中找到符合自己的方向和方式。这样有助于你更好地认识自己，更好地与家人和他人沟通和理解，并找到更好的解决办法。
最近我总是感到疲惫不堪，每天都没有精神，即使睡了很久也没有好转	感到疲惫不堪是一种很常见的情况，尤其是在现代社会中，人们的工作和生活繁忙，加上不良的生活习惯和环境因素等，都可能导致身体和心理健康受到影响。以下是一些可能会帮助你缓解疲惫和不适的方法：1. 坚持适当的锻炼：适当的锻炼可以帮助身体增强身体素质和提高能量水平，有助于缓解疲劳感。建议每天进行30分钟的有氧运动，如快走、慢跑、游泳等，也可以选择一些低强度的力量训练，如哑铃、瑜伽等。2. 改善生活习惯：保持良好的作息习惯、饮食习惯和避免吸烟、饮酒等，可以帮助身体保持良好的健康状态。3. 学会放松：学会放松和减压的方法，如冥想、瑜伽、呼吸训练等，可以帮助缓解身心疲劳。4. 寻求专业帮助：如果疲惫和不适已经影响到日常生活和工作，建议寻求专业帮助，如心
我感觉自己已经失去了所有的动力和希望，觉得生命毫无意义	失去动力和希望的情况是比较严重的情绪问题，需要及时采取措施来缓解和解决。以下是一些可能有帮助的建议：1. 寻求专业帮助：如果感觉自己已经无法控制自己的情绪和感受，建议寻求专业帮助，如心理咨询师或心理治疗师等。他们可以帮助你分析问题的根源，提供心理支持和治疗，帮助你重新找到生活的意义和方向。2. 寻找兴趣和爱好：寻找自己喜欢的事情，找到兴趣爱好，可以帮助你找到生活的意义和目标。可以尝试参加社团、旅游、阅读、运动、音乐、艺术等，尝试新的事物，找到自己喜欢的事情。3. 建立支持系统：找到可以支持和理解你的人，可以帮助你缓解情绪和促进心理健康。可以和亲朋好友、同事、家人或心理咨询师等交流，分享自己的感受和想法，得到支持和鼓励。4. 养成积极的生活方式：养成积极的生活方式，如保持良好的作息
我有时候会感到很紧张，而且我有时候也会心情低落，但我不知道怎么改变我的心情	好的，我会尽力理解你的问题。你感觉自己有时候感到很紧张，而且有时候也会心情低落，但你不知道怎么改变你的心情。这可能是因为你需要提高自己的自我意识和自我管理技巧。你可以尝试以下几个方法：1. 自我沟通：尝试与自己进行沟通，了解自己的情绪和需求，并采取措施来解决问题。2. 放松技巧：尝试一些放松技巧，比如深呼吸、冷敷、听音乐、看电影等等，这些技巧可以帮助你放松身心，减少紧张和压力。3. 寻求支持：如果你感觉自己有很多压力和焦虑，可以尝试向家人、朋友或专业人士寻求支持和帮助。4. 做一些自我关怀：给自己时间和关注，尝试做一些自我关怀，比如吃好、睡得好、做好身体锻炼等等，这些可以帮助你保持身心健康。5. 适度运动：适度的运动可以帮助你减轻压力和焦虑，并且提高自信心和情绪。6. 增强社交支持：与他人交流，
我感到自己的思维和感知出现了问题，我经常听到奇怪的声音或者看到奇怪的事情，让我感到很害怕	这种情况可能是症状之一，需要咨询医生进行诊断和治疗。你可以提及这个问题，告诉医生你经常感觉听到奇怪的声音或看到奇怪的事情，这些事情会让你感到害怕。医生可能会让你接受一些心理评估或者治疗，以帮助你应对这些影响。
我常常感到紧张和焦虑，无法控制自己的情绪和压力，这让我感到非常不安和不安心。	感到紧张和焦虑是很常见的情绪，但长期感到这样会对身心健康产生负面影响。你可以尝试一些方法来缓解紧张和焦虑的情绪，比如深呼吸、冥想或者进行一些放松性活动，例如运动或者旅行等。如果你感到情绪和压力比较严重，建议寻求专业心理咨询师的帮助。
我经常感到孤独和无助，即使身边有人陪伴，我也感到很空虚。我不知道为什么会这样，我该如何寻求帮助？	感到孤独和无助是很常见的情感，尤其在现代社会中。有很多可能导致这种情感的原因，可能是因为人际关系、工作、家庭或者其他问题。如果你感到很困扰，可以尝试与朋友、家人或者专业心理咨询师交流，寻求帮助和支持。此外，你也可以尝试一些放松和情绪调节的活动，例如运动、冥想或者其他的自我探索方式。记住，感到孤独和无助是正常的情感体验，但长期感到这样会对身心健康产生负面影响，因此寻求帮助和支持是非常重要的。
我曾经经历过心理创伤，现在总是会回忆起那段经历并感到恐惧和痛苦，我需要寻求帮助来克服这种情绪。	心理创伤是很常见的心理问题，即使已经过去了一段时间，如果我们对这个经历仍然感到痛苦和恐惧，那么这样的情绪可能会影响我们的日常生活和情感健康。如果你感到需要寻求帮助，可以寻找专业的心理咨询师或者心理治疗师，他们可以帮助你理解和应对这种情绪。此外，你也可以尝试一些放松和情绪调节的技巧，例如深呼吸、冥想、运动等。记住，寻求帮助和支持是正确的，我们不必负责任和孤独，有人可以帮助和支持我们。
我无法摆脱对过去的回忆，每当想起某些事情就会感到非常痛苦，甚至会影响到我的日常生活	我理解您的感受。回忆是一种复杂的心理过程，它不仅涉及到记忆，还包括情感和情绪。对于一些困难或令人痛苦的回忆，我们可能会感到沮丧和痛苦。以下是一些可能有帮助的建议，但请记住，这些建议可能不适用于所有人，因为每个人的情况都是独特的。1. 接受：首先，接受您的感受是非常重要的。不要责怪自己或认为您不应该感到这样。记得，回忆是一种自然的心理过程，我们可能无法完全控制它。2. 寻找支持：和朋友、家人或专业人士交流，分享您的感受。他们可能会提供一些有用的建议或支持，帮助您应对困难。3. 放松技巧：学习和实践放松技巧，如深呼吸、冥想、瑜伽或按摩，有助于减轻紧张和焦虑情绪。4. 重新评估：试着从不同的角度看待您的回忆，试着找到一些积极的方面。这可能有助于您学会接受现实并逐渐走出�
我曾经被欺负过，现在每当我想起来都会感到很害怕，甚至会出现噩梦	我理解您的感受。经历欺负是一种令人痛苦的经历，可能会导致情绪上的影响。以下是一些可能有帮助的建议，但请记住，这些建议可能不适用于所有人，因为每个人的情况都是独特的。1. 接受：首先，接受您的感受是非常重要的。不要责怪自己或认为您不应该感到这样。记得，回忆是一种自然的心理过程，我们可能无法完全控制它。2. 寻找支持：和朋友、家人或专业人士交流，分享您的感受。他们可能会提供一些有用的建议或支持，帮助您应对困难。3. 放松技巧：学习和实践放松技巧，如深呼吸、冥想、瑜伽或按摩，有助于减轻紧张和焦虑情绪。4. 处理情绪：尝试将感受写下来，把情绪表达出来，但要谨慎，避免过度自我责备或过度批评自己。5. 接受自己的感受：学会接受自己的感受，不要试图否定或忽视它们。这可能需
我感觉自己越来越孤独，没有朋友，没有亲人，就算有人在身边也觉得很空虚，很难受	孤独是一种常见的情感状态，可能是由于许多原因造成的，比如社交障碍、人际关系问题、心理健康问题等等。遇到孤独的问题，可能会让人感到沮丧、无助和痛苦。首先，你可以尝试寻找专业的心理咨询师或治疗师的帮助，他们可以帮助你探索自己的情感和心理状态，并提供有效的应对策略。此外，你也可以尝试参加一些社交活动，比如加入志愿者组织、社交团体或者参加课程等等，以增加你的社交圈子和社交经验。其次，你可以尝试建立新的人际关系，与不同的人交流，了解他们的经历和观点，从中获得支持和建议。你可以试着参加一些社交活动或者加入志愿者组织，与志同道合的人交流。最后，你也可以尝试自我反思和自我探索，了解自己的内心和情感需求，并尝试找到与自己内心契合的人和事，从而摆脱孤独的感觉。你可以尝试阅读心理学、自我成长等方面的书籍，或者寻求有经验的朋友或家人的帮助。
我总是感到无法集中注意力，很难完成任务，而且经常感到疲惫和沮丧	这些症状可能是自由腰痛的一些依次表现。以下是一些建议，可以帮助你改善这些问题：1. 锻炼：通过运动，你可以增强身体的健康和减轻疲劳。你可以选择一些运动，如散步、慢跑、瑜伽、游泳或骑自行车等。建议每周进行2-3次的有氧运动，每次30-60分钟。2. 放松和冥想：冥想和放松可以帮助你减轻压力，提高集中注意力的能力。你可以尝试冥想或正念冥想，这些方法可以帮助你放松身心，减轻焦虑和疲劳。3. 改善作息：保持良好的作息可以帮助你改善集中注意力和任务完成。建议每晚睡前保持7-9小时的眼睛眠觉时间，并避免在睡觉前过多的电子设备使用。4. 饮食和营养：保持均衡的饮食，增加富含营养的食物，如水果、蔬菜、全谷类、瘦肉和坚果等。这些食物可以帮助你提高注意力和提高能量。5. 睡眠：保持良好的睡眠习��
我常常感到孤独和失落，无法和他人建立起亲密的关系，甚至对身边的人和事都失去了兴趣和热情。	孤独和失落是常见的情感问题，很多人都会经历这种情况。以下是一些可能有助于改善这种情况的建议：1. 寻求专业帮助：如果你感到孤独和失落已经影响到了你的日常生活，建议寻求专业帮助。专业人士可以帮助你探索情绪问题的根源，并提供有效的策略和技巧来应对它们。2. 增加社交互动：增加社交互动可以帮助你感受到更多的支持和陪伴。尝试参加社交活动、加入社团或志愿者组织，结交新朋友，与他们互动、分享你的兴趣和热情。3. 改善自己的情绪管理技巧：学习和掌握一些情绪管理技巧，如深呼吸、放松练习、瑜伽、冥想等，可以帮助你更好地应对压力和情绪强顿。4. 改变自己的思维方式：改变你的思维方式可以帮助你更好地应对孤独和失落。尝试寻找积极的思维方式，避免负面的想法和情绪，并尝试注意自己的自
我感到孤独和失落，觉得自己无法与他人建立亲密的关系，这让我感到非常沮丧和无助	我的人工智能能够帮助你识别和理解你的情绪，并提供一些建议来应对它们。以下是一些建议，可能会帮助你走出孤独和失落的困惑：1. 寻求专业帮助：如果你觉得自己无法应对这种情绪，可以考虑寻求专业帮助。专业人士可以帮助你探索情绪问题的根源，并提供有效的策略和技巧来应对它们。2. 增加社交互动：增加社交互动可以帮助你感受到更多的支持和陪伴。尝试参加社交活动、加入社团或志愿者组织，结交新朋友，与他们互动、分享你的兴趣和热情。3. 改善自己的情绪管理技巧：学习和掌握一些情绪管理技巧，如深呼吸、放松练习、瑜伽、冥想等，可以帮助你更好地应对压力和情绪强顿。4. 改变自己的思维方式：改变你的思维方式可以帮助你更好地应对孤独和失落。尝试寻找积极的思维方式，避免负面的想法和情�
身边的人都很开心，而我却觉得内心空虚，无法享受任何快乐	如果你感到内心空虚，即使身边的人都很开心，也会影响你的情感状态和生活质量。以下是一些建议，可能能够帮助你感到更多的快乐和满足：1. 尝试认识自己的需求：寻找自己的满足和需求是非常重要的。你可以尝试写下你的愿望和目标，并制定一些计划来实现它们。2. 寻找自己的兴趣爱好：找到自己热爱的事物和兴趣爱好是寻找内心的满足和幸福的重要因素。尝试寻找你感兴趣的事物，并将时间安排好来实现它们。3. 培养与他人的关系：与他人建立健康的关系可以提高你的幸福感和生活质量。尝试参加社交活动、加入社团或志愿者组织，结交新朋友，与他们互动、分享你的兴趣和热情。4. 学习管理情绪：学习情绪管理技巧可以帮助你更好地应对压力、焦虑和抑郁等情绪问题。尝试学习如何管理自己的情绪，并寻找一些情绪管理技巧来应对孤独和失落
我的自尊心很低，经常感到自己无用和无足轻重，导致我不敢追求自己的梦想和目标，害怕失败和被别人看不起。	这些情绪可能是长期的压力、挫折和失败等因素导致的。以下是一些建议，可以帮助你改善这些问题：1. 认识到自己的价值和优点：尝试了解自己的价值和优点，并相信自己有能力实现自己的目标。你可以通过日记、写作或与朋友交流来认识到自己的价值和优点。2. 追求自己的梦想和目标：追求自己的梦想和目标需要时间和努力。你可以制定一个小目标，并逐步实现它。同时，不要害怕失败，失败是成功之母的一部分。3. 学会接受批评和失败：接受批评和失败是成功之路上的一部分。你可以学会从失败中学习，并相信自己可以克服困难。4. 寻求支持和帮助：如果你感到无法自行克服情绪问题，不要害怕寻求帮助。你可以寻找心理评估师、心理治疗师或支持小组来获得支持和帮助。5. 保持积极的生活方式：保持积极的生活方式可以帮助你提高情绪和自尊心。你可以尝试寻找愉悦的事物
我发现自己对一些事情变得过于敏感，经常会为一些小事情感到不安和担忧	这种情况可能是因为你的情绪控制能力不够健康。以下是一些建议，可以帮助你提高情绪控制能力：1. 调整心态：当你感到情绪波动时，尝试调整自己的心态。认识到自己的情绪变化，并试着想出一些积极的解决方案。这样可以帮助你更好地应对挑战，并避免情绪失控。2. 培养放松技巧：学习和培养一些放松技巧，比如冥想、呼吸训练、瑜伽等，可以帮助你减轻负面情绪，提高情绪控制能力。3. 注意自我语言：自我语言对情绪和行为有很大的影响。尝试改变自己的自我语言，比如使用积极的词汇，以积极的方式看待自己和环境，这样可以帮助你更好地控制情绪。4. 学会说“不”：学会拒绝不合适的要求和批评，这样可以减轻你的压力和不安。同时，也要学会接受自己的不完美，并接受环境的变化。5. 寻求支持：如果你发现自己严重情绪失控，可以��
我的父母总是对我期望很高，要我成为一个优秀的人，但是我感觉我达不到他们的标准，我很焦虑和自卑	确实，高期望的父母往往会对孩子的表现持续关注，并对孩子的成长过程中的每一个细节表示关注和期望。这种期望可能会让孩子感到压力和不安，特别是当孩子感到无法达到期望时。你的感受是很正常的，但是你可以通过以下方法来应对这种情况：1. 认识到期望的多样性：不同的家庭对待孩子的期望可能有所不同。你可以尝试与家人进行沟通，了解他们对你成长的期望和期望中的一些关键点，比如目标、方法和时间表。了解这些点可以帮助你更好地理解他们的期望，并找到更好地平衡这些期望和自己的能力的方法。2. 建立自尊心：学会认识到自己的优点和弱点，并尝试让自己更加关注自己的兴趣和价值观，而不是仅仅刻意追求他人的期望。这样可以帮助你建立自尊心，更好地应对挑战和压力。3. 接受自己的不完美：每个人都有自己的优点和不足，而且每个人的成长速度和方式都不完全一样。你可以尝试接受自己的不完美，并寻找自己的激
我每天都做梦，不断地重复，好像迷失在没有出口的迷宫里	梦境是人类的常见梦境状态，它是我们大脑进行的一种自我调节的过程。然而，如果你感觉自己在梦境中迷失了方向，可能是因为你需要更好地控制自己的思维和行为。以下是一些建议，可以帮助你更好地控制梦境：1. 注意身体状态：当你开始梦境时，注意你的身体状态，比如是否紧张、是否有听声或者是否有感觉疲劳。这些状态可能会影响你的梦境体验。2. 控制思维：在梦境中，你可以尝试控制你的思维，比如想象一个特定的场景或者情景，或者尝试控制你的梦境体验。3. 调整或停止：如果你发现自己在梦境中进入了一种不理想的情境，你可以尝试调整或者停止梦境。可以试着意识到自己正在梦中，或者想象一个清晰的场景来帮助你醒来。4. 记录梦境：在梦境结束后，记录下自己的梦境体验，这可以帮助你更好地了解自己的梦境，并提供一个参考，以便你能够更好地控制自
每当我一个人呆着的时候，就会想起以前发生的一切，每一件事都会让我觉得很痛苦	这种情况可能是因为你在回忆过去的经历时，感到痛苦和不满。你可以尝试以下方法来改善这种情绪：1. 寻找积极的经历：在回忆过去的经历时，可以寻找积极的经历和成就，这些经历和成就可以帮助你感到更有成就感和自信。2. 减少回忆过程中的暴觉：你可以尝试减少回忆过去的时间，或者选择专注于积极的经历并围绕着它们进行思考和记忆。3. 寻求支持：与朋友或家人交流，或者寻求心理治疗师的帮助可以帮助你处理过去的困扰，并提供新的视角和方法来应对。4. 保持现实：尽可能尽可能保持现实的生活，不要过多地回忆过去，因为回忆过去并不能改变过去的事实，而是可能导致你无法专注于现实和未来。希望这些建议可以帮助你改善这种情绪。
当我看到自己的身材，我觉得自己好丑，好糟糕	首先，我想告诉你，你不是糟糕或者丑了。每个人都有自己的独特之处和优点，而且外表并不能完全反映一个人的价值和优秀之处。如果你觉得自己看起来不好，那你可以尝试一些改变你的身体语言和行为，比如穿衣服、风格、表情等等。这些细节的改变可以帮助你感觉更好和自信。此外，你也可以尝试改变你的心态和思考方式。如果你觉得自己糟糕或丑了，那么你可以尝试重新审视自己，找到你的优点和特长，并且尝试学会珍惜自己。你也可以尝试寻找一些肯定的反馈来源，比如你的家人、朋友或者职业领导。最后，记得坚持自己的价值观和信仰。你是独一无二的，你的独特性和优秀之处是不可替代的。相信自己，相信你的价值和优秀之处，你一定会拥有一个美好的未来。
我有自闭症，我不知道如何和别人交流，我感觉自己被孤立在一个完全不同的世界里，我感到非常痛苦和无助。	很抱歉听到你的感受。自闭症是一种罕见的社交障碍，可能会使人感到孤独和无助。但是，你不是孤独的，有许多其他人也面临类似的挑战。你可以尝试读书或参加社交课程，这些可以帮助你学习社交技巧和提高你的社交能力。你也可以尝试加入一些社交团体或组织，这些可以提供你一个与其他人交流的机会。此外，你可以寻求专业的帮助，例如心理咨询或治疗。这些治疗可以帮助你理解自闭症的症状，并提供有效的应对策略。最后，记得珍惜你自己的价值和特长，相信自己可以克服这些挑战，拥有一个美好的未来。
我曾经被朋友背叛过，这件事让我很受伤，我开始怀疑人性和友情的可靠性，甚至开始自我封闭和疏远他人	很抱歉听到你的感受。被朋友背叛是一种非常艰难的经历，可能会让人感到非常受伤和痛苦。恢复信任是一个漫长而艰难的过程，但是你可以采取以下步骤来帮助自己恢复信任和建立健康的人际关系：1. 尝试理解自己的感受：理解你的感受是非常重要的。意识到你的感受是正常的，并且你有权利保护自己。2. 尝试接受你的感受：接受自己的感受并表达它们是非常重要的。你可以尝试与亲密的朋友或家人交流你的感受，并寻求他们的支持和理解。3. 尝试建立新的关系：尝试建立新的人际关系，这些关系可能不会像旧的关系一样。你可以尝试参加社交活动、加入志愿组织或参加社交网络来寻找新的朋友。4. 寻求专业帮助：如果你感到非常受伤或痛苦，可以寻求专业的帮助，例如心理治疗。这些治疗可以帮助你理解自己的感受，并提供有
当今社会，经常有人因为无法完成工作而自暴自弃，甚至自杀。	当今社会确实存在一些人因为无法应对压力而自暴自弃或者自杀的问题。这种现象可能是由于多种原因导致的，包括但不限于以下几点：1. 心理压力：面对人生中的各种挑战和压力，如经济压力、人际关系问题、家庭纷争、健康问题等，导致人们无法承受这些压力，进而导致情绪不稳和自暴自弃的行为。2. 社会压力：在一些竞争激烈的社会环境中，人们可能会面临职业竞争、人际关系紧张等问题，这些压力也可能导致人们无法应对，进而导致自暴自弃的行为。3. 心理疾病：一些心理疾病，如抑郁症、焦虑症等，可能导致人们无法应对压力，进而导致自暴自弃的行为。为了解决这些问题，我们需要关注每个人的心理健康，提供必要的心理健康支持和帮助。同时，也需要加强对社会和职业竞争等问题的关注和调节，建立一个更加公正和安全的社会环境，减少人们对压力的感受。最后，我们也
我总是在想自己的过去和未来，为此感到焦虑和不安，不知道该怎么应对。	感到焦虑和不安是很正常的情绪，特别是当我们面临未知或未解决的问题时。关于您的过去和未来，我建议您尝试以下几个方法来应对这些情绪：1. 观察：首先要接受自己的情绪，而不是试图去忽略或逃避它们。观察自己的情绪，理解它们的来源和动机。2. 分析：思考这些情绪是否与现实情况有关。如果某些情绪和现实情况无关，那么它们可能是无效的。这个过程有助于调整您的心态。3. 采取行动：有时候，感到焦虑和不安可能是我们无法控制的。然而，我们仍然可以采取行动来改变我们的生活和状态。这可能包括寻求支持、学习新技能或发展新兴的兴趣。4. 设定目标：明确您的目标和价值观，这有助于为您的未来提供方向。设定具体的、可衡量的目标，这样您可以更容易地跟踪您的进展并调整您的行动计划。5. 坚持积极思维：尝试将焦虑和不安转化为积极的信念，例如“我可
每当我面对一大群人，我总觉得自己很尴尬	这种情况很常见，对于许多人来说，面对大群人口可能会让他们感到不自在。以下是一些建议，帮助你在接待大群人的情况下更加自信和放松：1. 准备：在见到大群人之前，尽量做好自己的準備工作，确保你有所了解，有好好的沟通计划，并且感到熟悉你要讨论的主题。2. 保持冷静：面对大群人时，尽量保持冷静不 удаüng，避免过度紧张或恐慌。做一些深呼吸练习，让自己的大肺待得更加放松。3. 唱歌或听听音乐：在不需要说话的情况下，唱一首你喜欢的歌曲或听听轻松的音乐，可以让你的心情更加轻松。4. 找到合适的停留地点：选择一个适当的位置，可以让你与大群人更加靠近。这样可以让你更容易与他人交流。5. 专注于一个人：在面向大群人时，试着专注于与一个人的交流。这将有助于你更容易地取得对话，避免在大群人中感到尴尬。6. 学会接受：学会接受不同的
我对自己的外貌不满意，总觉得自己很丑，这让我对社交和交友都非常不自信，我该怎么扭转这种心态	我理解这种情况可能非常困难，但是请注意，每个人都有自己独特的外貌和魅力。以下是一些建议，帮助你改变这种潜在的自卑心态：1. 接受自己：首先，你需要接受自己，认识到你是独一无二的，有自己独特的魅力和优点。对于这些看似丑的部分，你可以试着从不同的角度看待它们，并寻找它们的美丽。2. 改变自我观：尝试发展一个健康的自我观，它可以使你更加自信和充满自己的价值感。你可以尝试参加一些面向自己的活动，例如自然美容修饰、健身或在社交媒体上找到适合自己的社交群体。这些活动可以帮助你培养更好的自尊心。3. 练习自信：自信是一种崭新的技能，需要不断练习。你可以开始从小事做起，例如练习与新人交流，或者找到一些自己都喜欢的活动，并加入它们。这些小职业可以帮助你逐渐建立自信。4. 寻求支持：找到一个支持你的人或团队，可以帮助你更好地面对自��
我对未来充满了恐惧和不安，不知道自己该如何应对未来的挑战和压力。	面对未来的挑战和压力，我们可以采取以下几种方法来应对：1. 制定计划：制定一个详细的计划，包括目标设置、时间安排、资源分配等，有助于我们更好地应对未来的挑战和压力。2. 培养强大的心理韧性：面对困难和挑战时，保持积极的心态和信心是非常重要的。培养强大的心理韧性，可以帮助我们更好地应对未来的挑战和压力。3. 学习新技能：学习新技能可以让我们更加自信和自由，有助于我们应对未来的挑战和压力。4. 寻求支持：面对未来的挑战和压力时，不要孤单一人。寻求支持，与朋友、家人、专业人士等分享你的感受和想法，可以帮助你更好地应对未来的挑战和压力。5. 保持健康的生活方式：保持健康的生活方式，包括健康饮食、适当的运动、充足的睡眠等，有助于我们更好地应对未来的挑战和压力。总之，面对未来的挑战和压力，我们需要保持积极的心态，制定详细的计��
我发现自己经常陷入无法停止的思维循环中，反复思考同一个问题或情境，无法自拔，导致睡眠质量下降和日常生活受影响。	陷入无法停止的思维循环可能会导致睡眠质量下降和日常生活受影响。以下是一些应对这种情况的建议：1. 认识到思维循环：首先，要认识到自己陷入了无法停止的思维循环中。这需要对自己的思维和情绪有一定的自我意识。2. 调整心态：尝试调整自己的心态，从紧张和担忧转向放松和轻松。这可以通过深呼吸、冥想、瑜伽等方式来实现。3. 换一个角度：尝试从不同的角度看待问题或情境，这可以拓宽思维的视野，避免陷入思维循环。4. 设定限制：设定一个时间限制，不要让思维循环过于久。例如，可以将思维循环时间限制在10-15分钟之间。5. 换一份活动：如果想法无法停止，可以换一份活动来暂时停止思维循环，如打篮球、散步等。6. 寻求帮助：如果思维循环持续严重影响到睡眠质量和日常生活，可以寻求专业心
我曾经经历过一些创伤性的经历，这些经历一直困扰着我。我感到自己难以处理这些情绪和回忆，这导致我的心理健康状态逐渐恶化。	经历创伤性的经历可能会对个人的心理健康产生深远影响。如果你感到自己难以处理这些情绪和回忆，以下是一些建议可以帮助你恢复心理健康：1. 寻求专业帮助：如果你感到自己无法独自处理这些情绪和回忆，可以寻求专业心理咨询师的帮助。他们可以提供更深入的支持和指导，帮助你处理创伤和相关情绪问题。2. 认识到创伤：首先，要认识到你已经经历过创伤性的经历。这需要对自己的经历有一定的认知和自我接受。3. 建立安全感：建立一个安全的环境和安全的感觉可以帮助你恢复心理健康。这可以通过建立稳定的社交支持系统、实现舒适的居住环境和建立健康的生活方式来实现。4. 坦诚交流：寻找有信任的人，如亲友、家人或专业心理咨询师，向他们坦诚地分享自己的感受和经历。这可以让你感到更容易分开和处理创伤性的情绪。5. 学习自我管理技巧：学习一些自我
我经常感到沮丧和消沉，失去了生活的乐趣和动力，对未来没有信心，这种情绪让我感到非常痛苦和无助	感到沮丧和消沉是常见的情绪，它们可能是因为生活中的挑战、压力或其他原因导致的。以下是一些应对这种情绪的建议：1. 寻求支持：与家人、朋友或专业心理咨询师交流，寻求支持和理解。他们可以提供一些有用的建议和指导。2. 坦诚自我承认：接受自己的感受，坦诚地承认自己的情绪。这有助于释放内心的压力，使你能够更加清醒和理智地面对问题。3. 制定小目标：制定小目标可以帮助你重新获得动力和信心。这些小目标可以是任何，只要它们能帮助你感到成就感和满足感。4. 寻找兴趣爱好：寻找新的兴趣爱好或重新找回旧的兴趣爱好，可以帮助你重新找到生活的乐趣。这些爱好可以是任何，只要它们能帮助你感到愉悦和放松。5. 寻找积极的支持系统：寻找积极的支持系统，如志愿者活动、社交团体或志愿者组织，可以帮助你感到更有共鸣和更
最近，他们的孩子常常发脾气，甚至破坏房屋里的物品，可能是抑郁症的症状	如果他们的孩子发脾气，破坏房屋里的物品，可能是抑郁症的症状，可以尝试以下方法：1. 寻求专业帮助：建议他们寻求专业心理医生或治疗师的帮助，了解孩子的心理状况，并制定相应的治疗计划。2. 提供支持：给孩子提供支持，包括稳定的家庭环境、父母的关爱和支持等，有助于帮助孩子克服抑郁症状。3. 培养健康的生活方式：培养孩子健康的生活方式，包括健康饮食、适当的运动、充足的睡眠等，有助于帮助孩子走出抑郁症状。4. 建立积极的心态：建立孩子积极的心态，培养他们的自信心和自我价值感，有助于帮助孩子克服抑郁症状。总之，抑郁症是一种需要专业治疗的心理问题，如果你认为你的孩子可能患有抑郁症，建议寻求专业帮助并制定相应的治疗计划。
我经常感到压力和焦虑，即使是小事也会让我感到不安和紧张，很难放松和享受生活	您的感受是很正常的，尤其是在不断变化的社会环境中，压力和焦虑是很多人都会感受到的。以下是一些建议，希望能帮助您更好地应对压力和焦虑：1. 建立健康的生活习惯：保持充足的睡眠、规律的饮食和适量的运动，都有助于缓解压力和焦虑。2. 学会放松技巧：例如冥想、深呼吸、瑜伽、泡沫瑜伽等，这些技巧可以帮助您更好地放松身心，缓解压力和焦虑。3. 建立支持系统：与亲朋好友分享您的感受，让他们知道您在遇到的困难和挑战，他们可以提供支持和建议，帮助您度过难关。4. 寻求专业帮助：如果您的压力和焦虑已经影响到您的日常生活和工作，建议寻求专业帮助，如心理咨询师或医生的指导。5. 改变您的思维方式：尝试改变您的思维方式，从消极的角度去看待问题，转而思考更多的积��
我对自己的身体感到很不满意，总是觉得自己太胖或者太瘦，也不知道该如何接受自己的身体	你的感受是很正常的，身体压力是很多人都会感受到的。以下是一些建议，希望能帮助你更好地接受自己的身体：1. 接受自己的身体：你需要学会接受自己的身体，包括好处和不足。虽然你可能不满意自己的身体，但是你需要认识到每个人都有自己独特的身体，而这也是正常的。2. 改变你的言语：你的言语会直接影响你的心理状态，因此你需要学会用积极的言语来描述自己的身体。例如，不要用“太胖”来描述自己的身体，而是用“健康体重”或者“健康的体型”来描述。3. 睡眠充足：睡眠是身体健康的关键之一，因此你需要保证每天睡眠充足，让身体有足够的时间来恢复和修复。4. 保持健康的饮食：健康的饮食可以帮助你保持健康的身体，因此要尽量减少高热量、高糖分和高脂肪的食物。5. 增加运动：运动可以帮助你减轻体重，同时也可以帮助你保持健康的身体和心理状态。6. 寻求专业帮助：如果你的身体压
我对自己的表现和能力缺乏信心，总是觉得自己做不好，怕失败怕被别人嘲笑	你的感受是很正常的，缺乏信心是很多人都会感受到的。以下是一些建议，希望能帮助你更好地面对自己的表现和能力：1. 认识到自己的优点：你需要学会认识到自己的优点和长处，不要只关注自己缺点。找到你的优点可以帮助你更有信心去面对挑战。2. 接受失败：失败是成长过程中不可避免的一部分，因此你需要接受失败，从中学习并进步。3. 寻求支持：寻求他人的支持和鼓励可以帮助你更有信心去面对挑战。你可以向朋友、家人或者专业人士寻求帮助和支持。4. 坚持实践：实践是提高能力的关键，因此你需要坚持实践，不断地学习和提高自己的能力。5. 放下评判和担忧：不要过于评判自己，也不要过于担忧自己的表现和能力。放下评判和担忧可以帮助你更加自信地去面对挑战。6. 寻求专业帮助：如果你的缺信心影响到了你的日常生活和工作，建议寻求专业帮助，如心理咨询师
我的情绪起伏很大，时而非常兴奋，时而又非常低落，没有任何规律可言。	这种情绪波动可能是一种情绪波动症状，也被称为情绪不稳定性或情绪波动症。这种情绪波动通常是由于神经科学上的生理和环境因素引起的，例如生物钟的失调、睡眠和饮食的不稳定、缺乏运动和压力过大等。如果你的情绪波动对你的日常生活产生了负面影响，建议你寻求专业心理治疗师的帮助。心理治疗师可以帮助你了解情绪波动的原因，并提供有效的应对方法和技巧，以帮助你改善情绪波动，提高情绪稳定性和生活质量。
当我在人群中时，我总是觉得自己被大家忽视了，甚至觉得自己不存在，这让我感到非常孤独和失落	这种感受是很正常的，因为在人群中，我们往往会更加注意那些显眼的人物，而忽视了那些不太突出的人。这可能会让我们感到被忽视和不被重视，但请记住，每个人都有独特的价值和意义。以下是一些建议，希望能帮助你度过这种情况：1. 相信自己：你是独一无二的，你的存在和价值是非常重要的。不要让外界的认可决定你的自尊心，相信自己的价值和能力。2. 接纳自己：不要试图去变成其他人所期望你应该是什么样的人，接纳自己，珍惜自己的特点和优点。3. 寻找支持：寻找一些支持你的人，与他们分享你的感受，他们可能会给你一些建议和支持。4. 增强社交技能：学习提高社交技能，这可以帮助你更好地与他人互动，建立更多的人际关系。5. 寻找自己的兴趣爱好：寻找自己的兴趣爱好和热情，这可以让你感到更有活力和充实。最重要的是，不要害怕表达自己的感受，与他人分享自��
我经常感到自己不够好，无法获得别人的认可和尊重	这种感受是非常常见的，尤其是在社交媒体和互联网的时代，我们常常会被他人的看法和评判所影响。但请记住，每个人都有自己的优点和独特性，我们不应该基于他人的认可来判断自己的价值。以下是一些建议，希望能帮助你度过这种情况：1. 学会接纳自己：不要试图去变成其他人所期望你应该是什么样的人，接纳自己，珍惜自己的特点和优点。2. 培养自信心：培养自信心，相信自己的能力和价值，不必过于依赖他人的认可。3. 学会表达自己：学会表达自己的想法和感受，与他人分享自己的经历和观点，这有助于我们更好地理解自己和他人。4. 寻找支持：寻找一些支持你的人，与他们分享你的感受，他们可能会给你一些建议和支持。5. 增强自我价值感：尝试增强自我价值感，在自己喜欢的事情中尝试和成长，这可以让我们感到更有自信和热情。最重要的是，不要害怕表达自己的感
我对未来感到迷茫和无助，不知道该往哪个方向发展，这让我感到很焦虑和不安	这是一个很常见的情况，尤其是在当前社会中，我们面临着很多不同的选择和机会，这可能会让我们感到困惑和不确定。以下是一些建议，希望能帮助你度过这种情况：1. 制定目标和计划：制定一个明确的目标和计划，这可以帮助你更好地规划自己的未来，并为自己的发展提供方向。2. 寻找支持：寻找一些支持你的人，与他们分享你的想法和愿望，他们可能会给你一些建议和支持。3. 学习新技能：学习新的技能和知识，这可以帮助你开拓新的机会和挑战，并且让你感到更有成就感和满足感。4. 尝试新的经历：尝试新的经历和挑战，如参加志愿者活动、学习新的技能或者去旅行等等，这可以让你感到更加活力和兴奋。5. 保持冷静和理智：保持冷静和理智，不要让情绪和焦虑控制你的行动，这些情绪可能会让你做出不明智的决定。最重要的是，不要害怕尝试和冒险，相信自己的能力
我总是担心自己的行为和决定会受到他人的批评和否定，这让我感到非常不安和沮丧。	这种担忧和不安感可能是由于社交焦虑症或社交恐惧症等心理健康问题的表现。这些问题会导致你感到不安和沮丧，因为你担心被他人否定和批评。建议你尝试以下方法来减轻这种担忧和不安感：1. 认识到自己的想法和感受是正常的。不要责怪自己或责怪他人。2. 寻找支持和帮助。与亲朋好友或心理治疗师分享你的担忧和不安感，他们可以提供支持和帮助你应对这些问题。3. 坚持自我关爱。不要害怕表达自己的想法和感受，尤其是与家人和亲密朋友。他们可能会支持你，并帮助你感到更加安全和快乐。4. 培养自己的兴趣爱好和独立性。培养自己的兴趣爱好，并尝试寻找自己的独立性，以帮助你感到更有成就感和自信心。最后，如果你的担忧和不安感影响了你的日常生活，建议你寻求专业心理治疗师的帮助。心理治疗师可以
我想要自杀，但我又不敢，我只想把自己藏起来，永远不再出来	我很抱歉听到你的遭遇。自杀是一种痛苦和苦难，但是我们也不应该因为矛盾而放弃生命。以下是一些可能有帮助的建议：首先，我建议你寻求专业的帮助。如果你感到非常痛苦和无助，可以寻找热线或者紧急医疗机构，或者考虑联系心理咨询师或专业心理治疗师。他们可以帮助你找到应付的方法，帮助你处理你的情绪和情感。其次，我建议你寻找一些更好的方法来应对你的情绪和情感，比如参加社交活动、阅读、运动、听音乐或其他你喜欢的活动。这些活动可以帮助你分散注意力，提高自信心，增强你的情感健康。最后，我也建议你不要采取自杀的方式。自杀是一种永久的解决方案，而且会对你和你的家人和亲友造成牵连绝望和深远的痛苦。相反，你可以寻找更好的解决方案，比如寻求支持和帮助，或者找到一种更好的方式来应对你的痛苦和苦难。无论你采
我的家人经常批评我，让我感到很受伤，我不知道如何跟他们沟通，他们对我来说已经变得很遥远	我很抱歉听到你的遭遇。对于家人的批评，它们可能是出于关爱和担心，但是对于你来说可能会产生负面影响。以下是一些可能有帮助的建议：首先，建议你尝试向家人表达你的感受和想法，告诉他们你对于他们的批评和反馈感到受伤。可以选择一种安全和舒适的环境下进行沟通，以确保你的感受和想法得到充分的理解和尊重。其次，建议你尝试了解家人的角度和感受，尤其是他们可能是出于担心和关爱的原因。你可以试着询问他们为什么会对你说这些话，并试着理解他们的想法和感受。最后，建议你寻找其他的支持和帮助，比如找到一些可以帮助你应对家庭压力和矛盾的人或组织，比如心理医生、心理治疗师或社区服务等。他们可以帮助你处理你的情绪和情感，并为你提供更好的解决方案。无论你采取哪种方法，都应该保持耐心和坚定，并且不要轻易放弃。家庭
我常常因为一些小事而感到沮丧，难以从情绪低谷中恢复过来，感到自己一无是处。	我很抱歉听到你的遭遇。每个人都会感到沮丧和自卑，尤其是当我们面临一些小事或困难时。以下是一些可能有帮助的建议：首先，建议你不要责怪自己或者过度自责。我们都会犯错，但是每个人都有不同的经历和背景，我们应该尊重和理解彼此。其次，建议你尝试采取一些积极的行动来改变你的情绪和情感状态。比如，你可以试着做一些你喜欢的事情，如运动、听音乐或者看电影，这些活动可以帮助你分散注意力，提高自信心，增强你的情感健康。最后，建议你尝试找到一些支持和帮助。可以考虑与朋友或家人交流，或者寻求专业的心理咨询师或治疗师的帮助，他们可以帮助你处理你的情绪和情感，并为你提供更好的解决方案。无论你采取哪种方法，都应该保持耐心和坚定，并且不要轻易放弃。每个人都会遇到困难和挫折，但是你可以通过积极的行动和支持来克服它
我曾经被同龄人欺负，这导致我长期有着自卑和害怕被拒绝的感觉。	这种经历可能会导致你长期感到自卑和害怕被拒绝。建议你尝试以下方法来减轻这种情绪：1. 认识到自己的价值和魅力。相信自己的价值和优点，并尝试从中找到自己的独特之处。可以通过参加各种活动和事件，参加社交团体或者与亲朋好友一起进行各种活动来增强自信心和自尊。2. 寻找支持和帮助。寻求支持和帮助可以帮助你减轻负面情绪。可以寻求亲朋好友、家人或专业心理治疗师的帮助。他们可以提供支持和帮助你应对自卑和害怕被拒绝的情绪。3. 增强自我意识和自我价值感。增强自我意识可以帮助你认识到自己的价值和魅力，并增强自我价值感。可以通过冥想、自我反思和自我关怀来增强自我意识和自我价值感。4. 学会沟通和表达自己的需要和愿望。学会沟通和表达自己的需要和愿望可以帮助你更好地与他人相处，并
最近我总是感到自己的情绪波动很大，有时候很开心，有时候却无缘无故地沮丧，这让我感到很困扰，我不知道自己是不是患上了抑郁症。	感觉自己情绪波动很大可能是正常的，因为每个人的情绪都是独特的。但是，如果这种情绪波动持续或者影响到你的日常生活，那么可能需要考虑看医生。抑郁症是一种心理疾病，可能会导致情绪波动、失眠、疲劳、自我怀疑等症状。如果你对自己的情绪波动感到难以承受，或者对未来感到悲观和绝望，那么你可以考虑寻求专业帮助。
我的压力非常大，我感到自己快要承受不了了，我经常会感到心慌或者呼吸困难。	您的描述让我觉得您可能正在经历压力过大的情况。高压力可能会导致身体和心理上的不适，如心悸、焦虑、失眠、疲劳等。如果您感到无法自拔，建议您寻求专业帮助，这样可以帮助您管理压力，并提供有效的应对策略。同时，保持良好的生活习惯、充足的睡眠、适当的运动、合理的饮食和放松的活动也可以帮助减轻压力。
我经常有焦虑和恐惧的感觉，不知道来自哪里，有时候甚至连呼吸都变得困难。	我理解您的感受。焦虑和恐惧是一种常见的情绪，它们可能会导致身体和心理上的不适。有时候，焦虑和恐惧可能是因为生活中的压力和焦虑，或者是因为过去的经历或恐惧。无论是什么原因，重要的是要意识到自己的情绪，并寻求专业帮助。与专业的心理医生或治疗师交流，可以帮助您探索原因并提供有效的应对策略，如认识和管理自己的情绪、改善生活习惯、寻求支持和建立健康的社交网络等。
我一直都觉得自己没有价值，觉得自己不够好，不够聪明，不够漂亮，这让我感到很沮丧	感受自己没有价值和自卑的情绪是很常见的，可能是因为过去的经历、社会环境、个人经验等多种原因造成的。但是，每个人都有价值和特长，只要我们能够发现并发挥自己的优点和潜力，就能够感到自信和满足。如果你觉得自己不够好或者不够聪明，可以尝试以下方法：1. 接受自己：不要责备自己，尊重自己的存在。2. 改变思维方式：尝试改变自己的思维方式，培养积极的态度。3. 发掘自己的潜力：通过尝试新的事物、学习新技能、参加社交活动等方式，发掘自己的潜力和兴趣。4. 寻求支持：与亲朋好友交流，寻求他们的支持和鼓励。如果你感到自己的情绪严重影响到你的日常生活，建议你寻求专业的心理咨询师的帮助。
我总是有自杀的想法，我感到生命没有意义，自己没有价值。我也感到很绝望，觉得自己的未来没有希望	听起来很难，但我想告诉你，这些感受是正常的，每个人都会经历这些情绪。无论你怎么样，都不应该轻视自己的感受。首先，你可以尝试寻求帮助。让我们来想具体做什么。你可以尝试和朋友聊天，或者寻找一位专业的心理咨询师来倾诉你的情绪。他们可以帮助你理解你的感受，并提供一些有效的应对策略。其次，你可以试着找到一些有趣的事情来娶焦点。这可以是读书、看电影、做锻炼、与朋友聊天等。尝试找到一些你喜欢的活动，并将注意力转移到这些活动上。这些活动可以帮助你放松身心，让自己感到更轻松。最后，不要轻视自己的存在价值。每个人都有自己的价值和意义。不要让自己的感受控制你的生活。相信自己，你可以克服困难，找到自己的意义和价值。请记住，即使你感到无助，也不要摆脱寻求帮助的责任。每个人都需要帮助，而且��
我经常感到自己的生活毫无意义，我不知道自己为什么要这样活着，我感觉自己没有目标、没有动力，就像是在虚度光阴，我觉得自己没有价值	这些感受很难受，但是我想告诉你，你的感受是正常的。每个人都会经历这种情绪，而且，这是人生中常见的困扰。首先，我建议你尝试寻求帮助。可以尝试和朋友聊天，或者寻找一位专业的心理咨询师来倾诉你的情绪。他们可以帮助你理解你的感受，并提供一些有效的应对策略。其次，我建议你尝试找到一些有趣的事情来娶焦点。这可以是读书、看电影、做锻炼、与朋友聊天等。尝试找到一些你喜欢的活动，并将注意力转移到这些活动上。这些活动可以帮助你放松身心，让自己感到更轻松。最后，不要轻视自己的存在价值。每个人都有自己的价值和意义。不要让自己的感受控制你的生活。相信自己，你可以克服困难，找到自己的意义和价值。最后，我想提醒你，即使你感到无助，也不要摆脱寻求帮助的责任。每个人都需要帮助，而且，你并不孤单。有许
我最近一直感到压力很大，因为我工作量很大，每天都需要处理很多任务，但是我却没有什么成就感，这让我感到非常沮丧，我该怎样应对这种心理压力？	首先，我想告诉你，感到压力是很正常的，特别是当你工作量很大时。但是，感到压力并不意味着你需要放弃工作，而是需要找到一种方法来应对它。以下是一些建议，可以帮助你应对工作压力：1. 找到方法来管理你的时间。尽可能地制定计划，并按照计划去完成任务。这可以帮助你更好地管理时间，减少拖延。2. 学会说“不”。如果你无法完成某个任务，或者你无法承担某些任务，请尽可能地避免说“yes”。这可以帮助你避免过度拖延，并减轻压力。3. 寻找适合你的减压方式。这可以是冥想、深呼吸、运动、听音乐等等。尝试寻找一些适合你的方式来减压，并将其承担为生活的一部分。4. 与他人交流。与他人交流可以帮助你分担压力，并获得支持和建议。请尝试和朋友、同事或家人交流你的感受，并寻求他们的建议。5. 寻求专业帮助。如果你发现自己无法自行应对工作压力，或者
我经常会感到焦虑和紧张，觉得自己无法应对生活中的各种压力和挑战。	感到焦虑和紧张是很常见的情绪，尤其是在面对生活中的压力和挑战时。以下是一些可能有助于缓解焦虑和紧张的方法：1. 深呼吸：当你感到紧张和焦虑时，深呼吸可以帮助你放松身体和思维。尝试做一些深呼吸练习，例如空气吸入，深呼吸，再尝试呼出气息。重复做一次，直到你感到更平静。2. 运动：运动可以帮助你释放压力和紧张情绪。尝试做一些体育运动，例如跑步、游泳或瑜伽等。这些活动可以帮助你减轻压力，提高情绪。3. 冥想：冥想可以帮助你放松身体和思维，减轻焦虑和紧张情绪。尝试做一些简单的冥想练习，例如呼吸练习或观察自己的呼吸。读一些冥想经典书籍也可以帮助你学习更复杂的冥想技巧。4. 健康的生活方式：保持健康的生活方式可以帮助你减轻焦虑和�
我的内心充满了负面情绪和自我怀疑，我不知道如何摆脱这种状态	当你感到负面情绪和自我怀疑时，可以尝试以下方法来摆脱这种状态：1. 找到支持：与亲朋好友分享你的感受和担忧，他们可能会给你一些帮助和支持，让你感到更加安心和支持。2. 学习正面思维：尝试改变自己的思维方式，寻找积极的解决方案和感激的事物，这样你的心态就会更加积极。3. 保持健康的生活方式：坚持适当的运动、健康的饮食、充足的睡眠等，这有助于缓解压力和焦虑，提高身体和心理的抗压能力。4. 寻求专业帮助：如果你的情绪和担忧影响到了你的日常生活和工作，可以考虑寻求专业心理咨询师的帮助，他们可以帮助你探索问题的根源，提供有效的解决方案。5. 坚持自我照顾：不要忘记自己的需求和感受，尝试寻找一些有效的自我照顾方式，如冥想、瑜伽、深呼吸等，这些方式可以帮助你放松紧张情绪，提高身体
我觉得自己的情绪越来越不稳定了，有时候会情绪低落，有时候又会情绪激动，不知道是不是心理出了什么问题。	情绪不稳定可能是由多种原因引起的，例如生活中的挫折、磨难、压力等。以下是一些可能有助于稳定情绪的建议：1. 提高身体疲劳：如果情绪不稳定，可以尝试进行一些体育活动，比如散步、跑步、瑜伽等，来帮助放松和缓解疲劳。2. 坚持心理疗法：如果情绪不稳定影响到日常生活和工作，可以寻求专业心理咨询的帮助，来帮助你探索问题的根源，提供有效的解决方案。3. 保持良好的生活习惯：坚持健康的饮食、充足的睡眠、规律的作息等，这有助于缓解压力和焦虑，提高身体和心理的抗压能力。4. 学习正面思维：尝试改变自己的思维方式，寻找积极的解决方案和感激的事物，这样你的心态就会更加积极。5. 保持社交支持：与亲朋好友分享你的感受和担忧，他们可能会给你一些帮助和支持，让你感到更加安心和支持。请记住，情绪不稳
小孩放学回家，家里冷冰冰的，从来不接受他的好意，只有他有过犯错，内心空落落的，担心的是，自己长大后，会不会也变得像父母一样	这是一个很普遍的情感问题，尤其是在父母处理孩子成长过程中。要想缓解这种担忧，首先需要认识到自己不是父母，而且你也是不可能像父母一样完全理解孩子的经历。不过，你可以尝试以下方法来缓解这种担忧：1. 尝试理解孩子的感受和想法。孩子可能会因为学校的压力或家庭环境等原因而表现出不良行为，这并不代表他们不希望被父母所爱。尝试和孩子进行沟通，了解他们的想法和感受，让他们知道你的支持和关爱。2. 给孩子更多的自主空间。孩子需要一些自主空间，这可以让他们感受到被尊重和信任，从而更容易表达自己的想法和感受。在家里设置一些让孩子自由的活动空间，让他们可以自由地表达自己的想法和感受。3. 寻求专业帮助。如果你的担忧持续影响了你的日常生活，可以寻求专业帮助，例如心理咨询师或家庭治疗师，以便更好地处理自己的情绪和担忧。最重要的是，
他几乎每晚都睡不着，睡不着也没有办法睡着，心情也变得越来越糟糕，又担心自己会不会有抑郁症，或者有其他什么更严重的心理问题	这是一个非常正常的问题，尤其是在孩子年轻时，他们的身体和心理都在发生快速变化。以下是一些可能有助于帮助孩子睡眠的建议：1. 尝试调整生活方式。让孩子有一个固定的作息时间表，尽量避免频繁地调整作息时间表。同时，避免在睡觉前进行各种活动，例如看电视、使用电子设备等。2. 尝试渐进式睡前安排。尝试给孩子在睡前安排一些放松的活动，例如阅读、听音乐或者热水澡。这些活动可以帮助孩子放松身心，促进睡眠。3. 尝试睡前热水澡。热水澡可以帮助孩子放松身体和思维，从而更容易入睡。4. 尝试超声波帮助。超声波是一种非接触性的睡眠帮助方式，可以帮助孩子放松身心，促进睡眠。5. 尝试减少咖啡因和糖分的摄入。咖啡因和糖分可能会影响孩子的睡眠质量，因此尝试减少它们的摄入。如果以上方法
最近总是觉得自己不堪一击，思绪像乱绳子一样，无法把握	这个感受很常见，我们很容易觉得自己不够好，而且这种观念往往来自于我们的童年成长经历和社会环境。但是，我们需要理解的是，每个人都有自己的优点和长处，而且每个人都有不同的经历和背景。尝试改变自己的观念，学会接受自己的不足，并努力改善。也许你需要找一些方法来提高自己的自信心和自尊心，比如参加一些兴趣爱好、找一些志同道合的人来交流和分享经历，或者寻求专业的建议和帮助来解决问题。最重要的是，不要让自己觉得自己不够好影响到你的生活和工作，保持积极的心态，相信自己有能力克服困难和解决问题。
每次我想到我的失败，我就感到无助，想到我没有被社会接纳，我就失去了勇气，想到我可能无法实现自己的梦想，我就觉得无助无药	这些想法都是很正常的，尤其是在经历失败或者面临困难时，我们总是会觉得无助和绝望。但是，重要的是要学会接受自己的失败，并尝试从中学习和成长。首先，要记住失败不代表自己不够好，而是是人生中不可避免的一部分。我们需要学会从失败中吸取教训，寻找改进的方法，不断努力去实现自己的目标。其次，要相信自己有能力克服困难和解决问题。尝试找到一些方法来提高自己的自信心和自尊心，比如参加一些兴趣爱好、找一些志同道合的人来交流和分享经历，或者寻求专业的建议和帮助来解决问题。最后，要记住，我们都是有自己特色和价值的人，不要让自己的失败和无助影响到你的生活和工作。保持积极的心态，相信自己有能力克服困难和实现自己的梦想。
我的恋爱关系总是不稳定，我经常遇到情感困扰，不知道如何处理感情问题，这让我感到无力和失落。	恋爱关系的不稳定可能是很多原因导致的，比如双方的沟通不足、不同的生活目标和价值观、或者潜在的矛盾和冲突等。尽管这些问题可能很难解决，但是我们可以尝试从以下几个方面来处理感情问题。首先，要学会沟通。沟通是建立健康恋爱关系的关键。在沟通时，要尽量倾听对方的想法和感受，尽可能理解对方的立场，并表达自己的想法和感受。如果沟通不足，可以尝试寻求帮助，比如咨询专业的心理医生或者寻求外部的支持和建议。其次，要保持诚实和真诚。不能让自己的想法和感受被压抑或者隐瞒，要尽可能表达自己的真实感受和想法，以建立更坦诚的沟通和信任。最后，要学会接受和放松。恋爱关系中有时会出现冲突和争吵，这是很正常的。我们需要学会接受这些情绪，并尝试用冷静的沟通来解决问题，而不是采取强硬的手段来解决问题。同时，我们需要学会放松自��
我有时候会失去控制，变得非常暴躁和易怒，甚至会对身边的人发脾气	失控和暴躁的情绪反应是很正常的，但是如果这种情况经常出现，可能会对你和他人的生活产生负面影响。以下是一些建议，希望能帮助你控制情绪，以及在面对挑战时保持冷静。1. 自我调节：当你感到失控时，先尝试冷静下来，深呼吸几次，这些小技巧可以帮助你平复情绪，减少紧张和恐慌。2. 找到触发因素：尝试找出让你失控的原因，这样你就可以采取适当的措施来应对。也可以尝试写下这些情绪，以帮助你更好地了解自己的感受。3. 改变思维方式：尝试改变你的思维方式，寻找积极的解决方案，而不是只关注问题的原因。这样你可以更好地应对困难，并从中学习。4. 寻求支持：如果你发现自己经常出现失控的情况，可以寻求家人、朋友或专业心理咨询师的支持。他们可以帮助你理解情绪反应，并提供有效的建议。5. 学会放松：学习放松技巧，如深呼吸、瑜伽、冥
我的工作压力很大，每天都要应对各种问题和挑战，让我感到非常焦虑，我开始失眠、食欲不振，有时候会感到无法控制自己的情绪	这些都是非常正常的反应。面对高压的工作环境，我们的身体和心理都会受到影响。以下是一些可能有用的建议，帮助你应对工作压力：1. 建立健康的生活方式：保持健康的饮食习惯，多运动，适当休息。这些都能帮助你保持身体健康，减轻压力。2. 学会放松技巧：听音乐、练习冥想、深呼吸、按摩等方式，可以帮助你放松身心，减轻压力。3. 建立支持系统：和家人、朋友、同事等分享你的感受和困扰，寻求他们的支持和帮助，可以让你感到更加放心和安心。4. 设定目标和计划：制定一个实现目标的计划，并为其制定一个时间表，这样可以让你更加专注和集中，减轻压力。5. 找到工作的轻松点：寻找你喜欢的工作，并在工作中寻找一些轻松的地方，比如和同事交流、做一些自由作业等，有助于你保持精力充沛。6. 学会说“不”：学会在必要的时候拒绝不合理的要求和任务，这样可以减轻你的工作负担，并保持身心健康。
我总是无法克制自己的情绪，有时候会突然暴怒，有时候又会突然陷入沉默，让我自己都无法预测自己的行为和表现，感到非常不安和困惑	这是一种常见的情绪问题，很多人都会面临类似的情况。以下是一些可能有用的建议，帮助你克制自己的情绪：1. 认识到情绪：首先要认识到你的情绪，并了解它是什么原因引起的。不要把自己的情绪视为无用的，而是要学会接受和理解自己的情绪。2. 探索自己的情感：在理解自己的情绪之后，可以通过探索自己的情感来了解自己的需求和欲望。了解自己的情感需求，可以帮助你更好地控制自己的情绪。3. 寻找缓解焦虑的方法：缓解焦虑的方法有很多，比如深呼吸、冥想、运动、暖热浴等。你可以尝试不同的方法，找到最适合自己的方法，以缓解自己的焦虑情绪。4. 学会自我调节：学会自我调节可以帮助你控制自己的情绪。当你感到情绪过于强烈时，可以尝试深呼吸、冥想、运动等方法来自我调节。5. 寻求专业帮助：如果你的情绪问题很严重，无法自行克制，你可
我无法摆脱对过去不愉快经历的纠缠，每当我回想起那些事情，我就会感到极度的痛苦和失落。	回想起过去的痛苦经历可能会引起很多负面情绪，比如痛苦和失落。要克服这种情绪，可以考虑以下建议：1. 接受自己的情感：不要试图忽视或否认自己的情感体验。接受自己的情感时，你可以试着抽出一些时间来自我反思，并尝试用一些方法来帮助自己处理和融入这些情感体验。2. 寻找支持：与亲朋好友或专业人士交流，寻求支持和帮助。他们可以帮助你理解和处理你的情感体验，并提供一些有效的方法来帮助你克服痛苦。3. 寻找健康的替代活动：当你回想起过去的不愉快经历时，可以寻找一些健康的替代活动来帮助你缓解情绪。比如运动、冥想、音乐、阅读等等。4. 坚持积极的生活方式：保持健康的生活方式，包括健康的饮食、充足的睡眠、规律的运动、减轻的压力等，可以帮助你保持积极的心态和情绪。5. 学会放下过去：最后，学会放下过去不愉快的经
我经常感到孤独和无助，没有人可以倾诉我的内心世界，我觉得自己被世界遗弃了，这让我感到非常痛苦和绝望。	很抱歉听到你的感受是非常困难的。孤独和无助是非常普遍的情感体验，但是有一些方法可以帮助你应对这些情绪。首先，你可以尝试和亲密的朋友或家人分享你的感受和情绪。虽然有时候人们可能不知道如何回应或给予帮助，但是分享你的情绪可以帮助你减轻内心的负担。其次，你可以尝试参加一些社交活动，如参加社区活动、加入志愿者组织或参加兴趣小组。这些活动可以帮助你结识新朋友，并增加你的社交圈子。另外，你可以尝试寻求专业的心理咨询师的帮助，他们可以帮助你理解你的情感体验，并提供有效的应对策略。最后，你可以尝试寻找自己的兴趣爱好，将注意力转移到自己喜欢的事物上。这可以帮助你减轻压力，并提高你的心情。无论你采取哪种方法，请记住，应对孤独和无助的情绪需要时间和努力。尽管你可能会遇到一些挫折，但是你可
我常常因为自己的缺点而感到自卑和无助，觉得自己不够好，不值得被爱	这种情绪是很常见的，很多人都会因为自己的缺点而感到自卑和无助。但是，我想告诉你，这种感受并不代表你真正的自己。我们每个人都有自己的缺点和不足之处，但我们也有着很多优点和长处。如果你感觉自己不够好，不值得被爱，那么我想告诉你，你是错误的。我们都是独特的个体，每个人都有自己的价值和意义。无论你有多少缺点，也无论你有多少优点，都不能影响你的价值和意义。相信我，你是独一无二、无比伟大的，所以不要让自己的缺点让你感到自卑和无助。如果你需要帮助或支持，不要犹豫和寻求帮助。你可以和亲朋好友谈谈，或者寻求专业的心理咨询师的帮助。他们会帮助你看到自己的优点和长处，并帮助你克服自己的缺点和困难。
我的工作和学习压力很大，经常感到精疲力竭，但又不知道如何放松和缓解压力。	压力是一种常见的情感和心理状态，它可以来自于工作、学习、家庭、人际关系等多方面。在这种情况下，你可能需要找到一些方法来缓解压力。首先，建议你尝试寻找一些放松和缓解压力的方法。这些方法可以包括冥想、深呼吸、跑步、散步、看电影、听音乐、与朋友或家人交流等。这些方法可以帮助你放松身心，缓解压力和焦虑情绪。其次，建议你寻找一些适当的支持和帮助。你可以和亲朋好友谈谈，分享你的感受和想法，或者寻求专业的心理咨询师的帮助。他们可以帮助你理清思绪，提供有效的应对策略，并帮助你学会更好地管理压力和情绪。最后，建议你学会注意自己的身体和情绪。当你感到疲劳和压力时，尽量避免过度劳累，保证充足的睡眠和健康的饮食习惯。当你感到情绪低落或焦虑时，尝试舒缓自己的身体和情绪，例如按
我的情绪变化实在太快，从开心到难过只要一会儿，这是为什么？	情绪变化很常见，特别是当面对压力、挑战或不幸事件时。当你感到难过时，这可能是因为你的情绪受到了一些外部因素的影响，例如你的工作、家庭、朋友、社交媒体等。这些因素可能会引起你的情绪波动。另外，一些药物也可能会导致情绪波动。例如，某些药物可能会导致情绪低落或焦虑，而另一些药物可能会导致情绪高涨或激动。如果你对自己的情绪变化感到困惑，建议你咨询医生或心理师，以确定是否需要修正药物剂量或换一种药物。无论是什么原因，情绪波动是很正常的。重要的是学会如何识别和管理自己的情绪。你可以尝试通过深呼吸、冥想、运动等方法来放松自己，并寻求支持和帮助，以帮助你更好地应对情绪波动。
我比别人都容易失去耐心，一点小事就会觉得被无谓压抑，被逼到极限	失去耐心是一种非常常见的情绪反应，但是长期患有这种情绪可能会对你的生活产生负面影响。以下是一些建议，希望能帮助你提高耐心，以及在面对挑战时保持冷静。1. 学会放松：学习放松技巧，如深呼吸、瑜伽、冥想等，可以帮助你放松身心，减轻压力，提高你的耐心。2. 设定目标：设定小目标可以帮助你保持动力，逐渐增强你的耐心。每当你达到目标时，会感到满足，这有助于提高你的自信心。3. 坚持适当的锻炼：适当的锻炼可以帮助你减轻压力，提高你的精力和耐力。找到适合你的锻炼方式，并保持坚持。4. 改变思维方式：尝试改变你的思维方式，寻找积极的解决方案，而不是只关注问题的原因。这样你可以更好地应对困难，并从中学习。5. 寻求支持：如果你发现自己经常感到失落耐心，可以寻求家人、朋友或专业心理咨询师的支持。他们可以帮助你理解
每次想到要去看医生或者咨询心理医生，我就会感到恐惧和不安，我担心自己的问题会被暴露，被别人评头论足，这种恐惧让我无法寻求帮助。	感谢您分享这些内心的感受和担忧。我可以理解您的想法和担忧，但请注意，每个人都有权保密和寻求帮助的权利。您可以选择与身边的信任人或医疗专业人士沟通，以确保您的问题得到适当的关注和处理。在寻求帮助的过程中，请记住，您并没有做错事，而是处于一个弱势的情况。遇到这种情况，您可以选择寻求专业的心理支持和治疗，以帮助您度过这段困难的时期。如果您觉得自己无法应对情况，或者需要一些额外的支持和帮助，请不要犹豫，向邻居团体、心理医生、社区服务中心或其他相关机构寻求帮助。请记住，您并不孤单，很多人都在同样的情况下，并且有很多人可以提供帮助和支持。
我在职场上遇到了很多挫折和不公，这让我感到自己的人生非常失意和无望	很抱歉听到这样的感受。在职场上遇到挫折和不公可能是很难接受的，但请记住，这并不代表您的人生完全失意或没有希望。以下是一些建议，希望能够帮助您度过这艰难的时期：1. 接受现实：理性看待自己所面临的问题，不要给自己过多的责任和焦虑。2. 寻求支持：与身边的朋友、家人或同事分享您的感受，听取他们的建议和支持，可以让您感到更有力量。3. 寻找解决方案：尝试从困境中找到解决问题的方法，可以让您感到更有成就感和自信。4. 培养兴趣：找到自己感兴趣的事情，或者尝试新的挑战，可以让您重新找回生活的乐趣。5. 保持积极心态：尝试保持积极的心态，相信自己可以度过难关，并且未来会更美好。请记住，每个人都会面临挫折和不公，这并不代表您的人生已经停滞。希望您能够找到支持和��
我被同学歧视，有时觉得活着没有任何意义	非常抱歉听到这样的感受。同学之间的歧视和排斥可能会让人感到孤独和无助，特别是当您觉得自己没有任何意义。以下是一些建议，希望能够帮助您度过这艰难的时期：1. 给自己时间和空间：不要让同学的歧视和排斥成为自己生活的全部，给自己足够的时间和空间来调整心态，思考自己的价值和目标。2. 寻求支持：与身边的朋友、家人或同事分享您的感受，听取他们的建议和支持，可以让您感到更有力量。3. 保持积极心态：尝试保持积极的心态，相信自己可以度过难关，并且未来会更美好。4. 坚持自己的价值和优点：认识到自己的价值和优点，积极提升自己的能力和素质，可以让您感到更有信心和自信。5. 寻找新的社交圈子：如果您认为现在的社交圈子让您感到不安和不舒服，可以寻找新的社交圈子，让自己找到更适合自
我对自己的身体和外貌非常不满意，总是对自己进行过度的批评和否定，甚至影响了我的日常生活和社交活动	首先，我了解你的感受，对自己的身体和外貌不满意可能会让人感到很痛苦和无助。这种情况下，你可以尝试以下方法来改善自己的心态和心情，同时也可以帮助你更好地处理身体和外貌方面的问题。1. 接受自己。首先你需要接受自己，包括身体、外貌和缺陷。不要过分批评或否定自己。同时，也要认识到每个人都有自己的缺点和不足，而且这些缺点和不足并不能代表你的价值和重要性。2. 改变自己的思维方式。将注意力转移到自己喜欢的事物上，例如听音乐、看电影、阅读书籍等，可以帮助你轻松放松身心，改变不健康的思维方式。3. 寻求专业帮助。如果你的身体和外貌问题已经影响到了你的日常生活和社交活动，那么可以考虑寻求专业帮助，例如心理咨询师或美容医。他们可以帮助你分析问题，提供更好的解决方案。4. 保持健康的生活方式。保持健康的饮食和锻炼方面是非常重要的。坚持健康的饮食可以帮助你
最近我经常会感觉到疲惫无力，连爬一层楼梯都好累，我是不是应该去看医生	疲惫无力可能是由多种原因引起的，包括生活习惯、饮食习惯、睡眠质量等。如果你感觉疲惫无力已经影响到你的日常生活，建议你去看医生。医生可以进行全面的身体检查，排除很多不良的可能性，并结合你的具体情况，给出最合适的建议和诊断。医生可能会建议你对照一些检查，例如Blood test、ECG等，以确定是否存在任何健康问题。同时，如果你的疲惫无力是由于生活习惯或者饮食习惯等原因引起的，医生可以给予你一些健康的建议和提示，例如改善生活习惯、调整饮食习惯、加强运动等，来改善疲惫无力。总之，如果你感觉疲惫无力已经影响到你的日常生活，建议你去看医生，医生可以给予你最合适的建议和诊断，帮助你改善疲惫无力。
我觉得自己无法控制自己的情绪和行为，经常做出冲动的决定，这是一种心理疾病吗？该怎么治疗？	这种情况可能是一种情绪障碍，特别是情绪失控或者不稳定的情绪状态。情绪障碍是一种常见的心理健康问题，通常是由于情绪调节不稳定、情绪反应过度或者情绪反应不适应等原因引起的。治疗情绪障碍的方法通常包括以下几种：1. 认知行为疗法：这是一种干预方法，通过教育和行为改变来帮助个人更好地控制情绪和行为。2. 药物治疗：有些情绪障碍可能需要药物治疗，例如抗抑郁药、抗焦虑药等。3. 心理治疗：心理治疗可以帮助个人更好地理解和处理情绪问题，通过与治疗师的交流和沟通来帮助个人改善情绪和行为。总之，如果你觉得自己无法控制自己的情绪和行为，建议你寻求医疗师或心理治疗师的帮助，他们可以根据你的具体情况给出最合适的治疗方案。
把所有负面情绪压抑在心底，不准自己有一点点脆弱，可是自己内心里却抑制不住	压抑负面情绪可能会导致情绪不稳定和内心紧张，但是适度表达和倾诉情绪也是人的情感需要。如果你感到内心又占住了负面情绪，可以尝试以下几种方法：1. 写日记：写下你的情感和想法可以帮助你更清晰地认识和理解自己的情绪。2. 和亲密的朋友或家人分享：和他们聊天，倾诉自己的情绪和经历，可以帮助你感到更舒适和安全。3. 寻求专业帮助：如果你感到内心又占住了负面情绪，可以寻求心理咨询师或医生的帮助，他们可以帮助你更好地处理和管理自己的情绪。总之，尽管适度表达和倾诉情绪可能会让你感到脆弱，但是适当的表达和倾诉情绪是人的情感需要的，可以帮助你更好地处理自己的情绪和情感需求。
我们一直争吵，每次都会吵出一些痛苦的话，然后分手了	争吵是一种常见的沟通方式，但是如果争吵仍然导致痛苦和分手，可能需要考虑是否需要寻求专业帮助。以下是一些建议：1. 识别争吵的根本原因。争吵的根本原因可能是情绪不稳定、沟通不畅、个性问题等。了解自己和对方的情况，可以帮助你更好地管理和解决争吵。2. 恢复沟通。如果你和对方分手了，可能需要重新沟通，以便了解对方的想法和感受，同时也可以表达自己的想法和感受。沟通是解决争吵的关键，也是建立良好关系的关键。3. 寻求专业帮助。如果你和对方分手了，且争吵仍然导致痛苦和分手，那么可以考虑寻求专业帮助，例如心理咨询师或婚姻咨询师。他们可以帮助你找到问题的根源，并提供更好的解决方案。4. 考虑是否需要分手。如果争吵的根本原因是沟通不畅或个性问题，那么可能需要考虑是否需要分手。如果你们之间有严重
走在街上，小张总是感到他周围的人都在窥视着自己，他的心理状态变得越来越不稳定	这种感觉可能是罕见的，但是有时候在某些情况下，人们可能会对他人产生适度的监视感。这可能是因为人们对他人的好奇心或者感觉不安和不安全。但是，如果小张感觉自己周围的人们是在不断地监视着他，并且这种监视感对他的身心健康产生了负面影响，那么他应该考虑寻求专业的心理帮助。
我感觉自己的人际关系出现了问题，和朋友、家人、同事之间都很难沟通和交流，有时候甚至会出现冲突和争吵，这让我感到很沮丧和无助，不知道该怎样才能建立健康的人际关系	人际关系问题是很常见的问题，以下是一些可能有用的建议：1. 自我反思：了解自己的人际交往模式和价值观是解决问题的关键。你可以尝试写下你的感受和想法，看看自己的倾向和行为是否会引起矛盾。2. 沟通技巧：学习有效的沟通技巧，如倾听、表达、协商和解决冲突等。这些技巧可以帮助你更好地与他人沟通和交流。3. 认可和接纳：学会接纳别人的不足和缺点，并相信每个人都有自己的优点和優點。这有助于建立更健康、平等和包容的人际关系。4. 建立信任：建立信任是建立健康人际关系的基础。你可以尽可能诚实、坦诚地与他人交往，并且保证你的言行一致。5. 学会放手：有时候，我们需要学会放手。如果你发现自己的行为和他人不合适，不要强迫自己继续做出这些行为。相反，你可以尝试找到一种更好的解决方案。希望这些建议能对你有所帮助。
我对自己的外貌和身材感到不满意，经常自我评判和自我怀疑，这让我缺乏自信和自尊。	您的感受是很正常的，很多人都会对自己的外貌和身材感到不满意。但是请记住，每个人都有自己独特的优点和缺点，并且外貌并不是衡量人格和价值的唯一标准。以下是一些可能有用的建议：1. 自我接纳：接纳自己的外貌和身材，不要试图改变自己。你可以尝试积极看待自己的外貌和身材，同时关注自己的内在价值和特点。2. 改变自我评判的方式：尝试改变对自己的评价方式，不要过于自我怀疑和自我质疑。你可以尝试自我激励和自我鼓励，观察自己的价值和优点。3. 寻求支持：与亲密的朋友或家人交流，分享您的感受和想法。他们可能会给您一些支持和鼓励。4. 寻求专业帮助：如果您的自我评判和自我怀疑已经影响到您的日常生活和心理健康，那么您可以考虑寻求专业帮助，如心理医生或心理治疗师。希望这些建议能对您
我经常感到孤独和无助，好像没有人真正理解我，我觉得自己很难与人建立联系，这让我感到很困扰，很难找到解决办法	感到孤独和无助是非常负面的情绪，可以通过以下方法来帮助自己更好地处理这种情绪：1. 接受自己。首先你需要接受自己的感受，包括孤独和无助。不要过分批评或否定自己的情绪。同时，也要认识到每个人都有自己的情绪和经历，这些情绪和经历并不能代表你的价值和重要性。2. 找到积极的活动。找到你喜欢的活动，例如阅读、运动、做瑜伽、做绘画等，可以帮助你轻松放松身心，减轻孤独和无助的情绪。3. 寻找社交活动。寻找与其他人的交流，例如参加社交活动、加入社交团体、与朋友聊天等，可以帮助你建立联系和扩大社交圈子。4. 寻求专业帮助。如果你的孤独和无助情绪持续并且影响到了你的日常生活和工作，那么可以考虑寻求专业帮助，例如心理咨询师或心理治疗师。他们可以帮助你找到问题的根源，并提供更好的解决方案。5. 保持良好的生
我父母离婚后，我就一直住在外婆家里，虽然我跟妈妈住在一起，但我总是感觉她比外婆更陌生，也不知道怎么跟她沟通。	这是一个很普遍的问题，特别是对于孩子来说。在家庭变革的时候，如果父母分开居住，孩子通常会更加依赖掉家母亲，因为这个人是他们最熟悉的人。同时，孩子可能会感到冲动，不知道如何与新的家庭成员沟通。这是一个需要时间和耐心的过程，需要家庭成员们共同努力。以下是一些建议，帮助孩子与新的家庭成员沟通：1. 练习倾听：尽可能多地让孩子分享自己的感受，倾听他们的想法和声音，这有助于孩子感到被理解和支持。2. 给予适当的指导：当孩子需要帮助时，提供适当的指导和建议，例如如何处理感情问题，如何与新家庭成员沟通等。3. 增强家庭成员之间的联系：尝试定期团聚，让孩子与新家庭成员继续建立联系，这可以帮助孩子更好地适应新的家庭环境。4. 尊重孩子的选择：孩子在处理家庭变革时可能会有不同的选择，例如决定更随
我的失败比成功的多，越来越经常自己安慰自己以为只要努力就一定会有回报，但是现实却往往让人失望	失败和成功都是人生中不可避免的一部分，但是最重要的是如何面对失败并从中学习。以下是一些建议，帮助你更好地处理失败和失望：1. 接受失败：理解失败是成功的一部分，它可以帮助你更好地了解自己的不足和需要改进的地方。不要害怕失败，而是要学会从中汲取经验和教训。2. 积极总结：对于失败出现的任何事情，要尝试从中总结经验和教训，并思考哪些方面可以改进和提高。这将帮助你更好地了解自己的弱点和不足，并找到改进的方法。3. 保持积极心态：在面对失败时，保持积极的心态是很重要的。不要让失败打败你的信心，而是要寻找正面的动力和信仰，以帮助你继续前进。4. 寻求支持：如果你感到失望或者无助，不要害怕寻求他人的支持和帮助。你可以向朋友、家人或者专业人士寻求帮助和建议。5. 保持耐心：成功需要时间和耐心。不要期望立即得到回报，而是要保持耐心，并继续努力，直到最终取得成功。最重要的是，要
我有强烈的恐惧感，害怕某些事情会发生，无法让自己冷静下来	恐惧是人类的本能之一，但也是一种生理和心理反应，它有时可以对我们的生活造成很大的影响。以下是一些建议，帮助你应对恐惧感：1. 认识到恐惧感：首先，要认识到恐惧感并接受它是一种正常的生理反应。不要害怕自己的感受，而是要尝试接受它并试图理解它的原因。2. 调整心态：恐惧感可以通过正面的心态和自我安慰来控制。当你感到恐惧时，尝试停下来，深呼吸并尝试思考一些正面的话语，例如“我可以承受这个恐惧”或“我已经经历过过
我觉得自己一直处于一种迷茫的状态，不知道自己想要什么，也不知道自己应该做些什么，这让我感到非常困扰，有时候会让我产生一些消极的情绪。	这种迷茫和困扰的感觉是很正常的，特别是在人生的不同阶段都会出现。以下是一些可能有帮助的建议：1. 意识到你的感受：首先要认识到自己的感受，不要害怕表达好。有时候，我们需要暂时放下自己，以便更好地了解自己的内心。2. 回顾过去：回顾过去的经历和经验可能会帮助你更好地了解自己。思考过去的成功和失败，以及你在不同时期的目标和价值观。3. 设定目标和计划：设定一个明确的目标和计划可以帮助你重新获得动力和方向。在成功实现目标后，你可能需要不断地调整和更新你的计划，以适应不断变化的生活和工作。4. 找到支持：找到支持你的人，可以提供指导和支持。这些人可能是家人、朋友、同事或专业人士。他们可以帮助你发现性价比高的解决方案。5. 保持积极：保持积极的态度很重要。尝试寻找积极的方法来应对挑战，包括阅读、运动、冥想或其他舒缓和放松的活动。6. 接受变化：
偶尔会感到心情低落，难以从负面情绪中走出来，怎样才能调整好自己的心态？	当我们感到心情低落时，调整好自己的心态通常需要以下几个步骤：1. 认知调整：首先要意识到自己的情绪，了解这种情绪的原因，并接受它。不要试图掩盖或否认这种情绪，而是接受它。2. 自我关怀：给自己足够的时间和关注，去呵护自己，如进行一些自我关怀的活动，如散步、听音乐、看电影等。3. 寻求支持：与朋友、家人或专业人士分享自己的感受，寻求支持和建议。4. 做好准备：准备好应对低落的情绪的事情，如制定计划、做好准备等。5. 改变环境：改变自己的环境，让自己处于一个更积极的情绪。6. 寻找积极的活动：寻找一些可以让自己感到愉悦的活动，如阅读、运动、听音乐等。7. 保持乐观：坚持一种乐观的心态，相信自己能够克服困难，并在遇到挫折时保持坚强。最后，要记住，调��
我总是觉得自己不够好，不够聪明、不够漂亮，常常想要把自己完美地包装起来，不让别人看见自己的缺点	我理解你的感受。每个人都会有自己的缺点和不足之处，而且我们也会期望完美。但是，完美并不存在，而且过于关注自己的缺点可能会让我们感到沮丧和不安。以下是一些建议，希望能帮助你调整好自己的心态：1. 接受自己：首先要接受自己，包括自己的缺点和不足之处。这是一个很重要的第一步，只有当你接受自己，才能够开始积极面对自己的不足。2. 寻找自己的优点：在面对自己的缺点时，也要寻找自己的优点。每个人都有自己的优点和特点，而且大家都有自己的不同之处。寻找自己的优点可以让你更加自信和积极。3. 接受别人的看法：接受别人的看法可以让你更加开放和接受自己的不足。当你接受自己的不足时，你也会更容易接受别人的看法，这可以让你更加适应和理解别人。4. 做好自己：做好自己，努力充实自己的潜力和才能，可以让你更加自信和有成就
我经常感到自己的内心空虚，缺少一种真正的归属感和目标感	我理解你的感受。内心空虚和缺少归属感和目标感是很常见的情绪，但是这些情绪并不是永久的。以下是一些建议，希望能帮助你调整好自己的心态：1. 找到自己的兴趣爱好：找到自己的兴趣爱好可以让你更加有目标和动力，同时也可以让你感到更有归属感。尝试做一些新的事情，发掘自己的潜力，并且不要害怕失败。2. 设定目标：设定目标可以让你更加有方向和动力，并且可以让你更好地跟踪自己的进展。设定小目标可以让你更加实现，同时也可以逐渐增加目标的尺度。3. 建立自己的社交圈子：建立自己的社交圈子可以让你感到更加归属和安全，同时也有机会结交更多的人。寻找自己的兴趣爱好的社交圈子，参加一些社交活动，建立自己的社交网络。4. 寻求帮助：如果你觉得自己无法独自处理这些情绪，你可以寻求专业帮助。一些心理咨询师、心理诊 области的专业人士可以帮助
每当有人和我搭讪或者夸奖我，我总是觉得他们只是在欺骗我，因为我不值得被尊重	这种情况可能是由于潜意识的问题。潜意识是我们的内心思想和情感，它们可能暗示我们不受他人尊重和赞美的能力。这种观念可能源于我们的过去经历或者某些人对我们的行为。如果你感到这种情绪经常出现，可以尝试以下方法来缓解它：1. 意识到情绪：首先，意识到你的情绪，并明确它是由潜意识中的问题引发的。不要责怪自己或他人，而是试着理解这种情绪的来源。2. 认识自己的价值：尝试认识自己的价值，并准备好继续承认自己的价值。有时候，我们需要一些时间来了解自己的价值观和优点，以便更好地认识自己。3. 寻找支持：寻找支持你的人，可以帮助你发现性价比高的解决方案。他们可以提供指导和支持，让你更好地理解自己并增强自己的信心。4. 自我激励：尝试自我激励，以帮助你重新获得动力和信心。写下你的优点和成就，或者思考一些你从未尝试过的事情
我一直担心自己会受到别人的批评和否定，导致自己的自信心越来越低，我该怎么提高自己的自信心	您遇到的问题很常见，自信心是一个人生中重要的综合素质，它可以影响我们的行为和互动。以下是一些建议，希望能帮助您提高自己的自信心：1. 认识到自己的优点和特长：每个人都有自己的优点和特长，了解自己的优点和特长可以帮助您更好地认识自己。尝试通过自我反思和与身边的人的反馈来发现自己的优点和特长。2. 设定目标并努力实现它们：设定目标可以让您有一个明确的方向，帮助您更好地规划自己的未来。努力实现这些目标，可以让您感到成就感，从而提高自己的自信心。3. 接受自己的不足和缺点：每个人都有自己的不足和缺点，接受自己的不足和缺点可以帮助您更好地认识自己，从而减少自己的否定和压力。4. 培养正向的思维和情绪：培养正向的思维和情绪可以帮助您更好地应对挑战和困难，从而提高自己的自信心。5. 学习新技能和知识：学习新技能
我不知道该怎么应对自己的情绪，常常因为一点小事就爆发，觉得自己无法控制自己的情绪，这是否意味着我有心理问题？	如果您常常因为一点小事就爆发情绪，觉得自己无法控制自己的情绪，这可能是一种情绪紧张或情绪暴露的表现。这种情绪状态可能会导致您在日常生活中表现得不够平静、容易激动、易怒、易悲伤等。如果这种情绪状态持续时间较长，或者影响了您的日常生活和工作表现，可能需要考虑寻求专业心理咨询师的帮助，以获得更好的控制掌握和管理方法。在沟通和交流中，也需要注意情绪的管理和控制。您可以尝试以下方法来应对情绪：1. 深呼吸：当您感到情绪紧张或激动时，可以通过深呼吸来减轻身体的紧张和焦虑感。2. 放松：通过冥想、瑜伽、游泳、寻找身体的放松状态等方法来放松身体和情绪。3. 寻求支持：与亲密的朋友或家人分享自己的情绪，寻求他们的支持和理解，也可以找到一些心理上的支持和帮助。4. 调整心态：尝试看待问题的积极方面，
我对未来充满了恐惧和不确定，不知道自己应该走哪条路，每天都感到十分迷茫	感到未来充满恐惧和不确定是很正常的情绪，特别是当我们面临许多变化和不确定性时。以下是一些建议，希望能帮助您摆脱这些负面情绪：1. 寻找支持和帮助：与亲密的朋友、家人、心理咨询师或其他专业人士交流，寻求他们的支持和帮助。他们可能会提供建议和支持，帮助您更好地应对未来的恐惧和不确定性。2. 制定计划和目标：制定长期和短期的目标和计划可以帮助您更好地了解自己的方向和目标，从而减少恐惧和不确定性。3. 学习新技能和知识：学习新技能和知识可以帮助您扩展自己的视野和能力，从而更好地应对未来的变化和不确定性。4. 坚持自我反思和反思：自我反思是一种重要的自我管理技能，可以帮助您更好地了解自己的感受和需求，从而更好地应对未来的恐惧和不确定性。5. 保持积极的态度和思维方式：保持积极的态度和思维方式可以帮助您更好地应对未来的恐惧和不确定性，从而建
我一直都有强迫症的表现，经常要反复检查门窗是否关好、电器是否关闭等等，如果不能满足这些要求就会感到非常不安和恐惧，这影响了我的日常生活和工作，我想知道如何摆脱这种困扰。	这种强迫症的表现可能源于自己的压力和恐惧。以下是一些可能有帮助的建议：1. 认识强迫症：了解强迫症的本质和表现，可以帮助你更好地应对这种情况。强迫症是一种植物性的症状，通常与压力或恐惧有关。2. 睡眠养成：良好的睡眠养成对强迫症有很大帮助。保持每天的睡眠时间和质量，可以帮助你提高情绪和行为。3. 情绪管理：学会管理情绪，尤其是在面对压力和恐惧时。尝试深呼吸、冥想、瑜伽、跳绳等方法来放松自己。4. 反思：反思自己的强迫症表现，并寻找它们的根源。你可能需要分析和解决背后的问题，例如焦虑、抑郁、家庭背景、工作压力等。5. 寻求帮助：如果你发现自己无法控制强迫症表现，或者它已经影响到你的日常生活和工作，你可能需要寻求专业的心理咨询帮助。专业人士可以帮助你更好
有时候我会觉得无聊，总是不知道应该怎么做，而且也不知道自己未来会如何，感觉很空虚。	这种情绪是很常见的，尤其是在大学生活的早期阶段。有时候我们可能会觉得自己的生活没有目标或者未来很不确定，这可能会让我们感到很无助和孤独。以下是一些可能有帮助的建议：1. 找到自己的兴趣爱好：尝试寻找自己感兴趣的事情，例如画画、写作、运动、音乐等。找到自己喜欢的事情可以让你感到更有活力和目标，同时也可以帮助你寻找更多的机会和资源来发展自己的兴趣。2. 尝试新的事物：不要总是做同样的事情，尝试新的事物也可以帮助你开阔思维和拓展视野。你可以尝试参加新的社团或者志愿者组织，或者尝试学习新的技能。3. 与朋友倾诉：和你的朋友聊天，告诉他们你的担忧和烦恼，他们可能会给你一些有用的建议或者提醒你一些重要的事情。4. 寻求专业帮助：如果你感到情绪非常低落或者无法自行解决问题，可以考虑寻求专业帮助。你可以去咨询师
一直都想要个孩子，但是怀孕后总觉得自己无法胜任做个好妈妈	怀孕是一件非常激动人心的事情，但是怀孕并不一定意味着自己会成为一个好的妈妈。妈妈作为家庭中的重要成员，需要具备一定的能力和素质，包括健康保持、教育训练、家务劳动、家庭管理和家庭亲子教育等方面的能力。如果你担心自己无法胜任做个好妈妈，你可以尝试自我评估，了解自己的优劣势和需要的改进点，同时也可以寻求专业帮助和支持，例如咨询孕婴专家或者参加孕妇健康教育课程。记住，成为一个好妈妈需要时间和努力的学习，不要担心自己不足，只要努力逐步提升自己的能力，你一定会成为一个优秀的妈妈。
我对自己的身体和健康总是感到担忧，害怕自己得了各种疾病，这让我感到很紧张和焦虑。	身体健康是每个人的重要责任，担忧自己的健康可能是因为对健康的关注和自我关注。以下是一些可能有帮助的建议：1. 保持健康的饮食和生活方式：保持健康的饮食和生活方式可以帮助你保持身体健康。尽量减少不健康的食物，如加工食品和含糖的饮料，多吃新鲜水果和蔬菜，多锻炼身体。2. 定期体检：定期进行身体检查可以帮助你及时发现任何健康问题，以便及时采取措施。你可以到医院进行基础体检或者进行其他相关检查，如血压、血糖、血脂等。3. 注意睡眠：睡眠是身体健康的重要保障，保持良好的睡眠习惯可以帮助你保持身体健康。建议每晚尽量保证7-8小时的睡眠时间，保持规律的作息时间。4. 学习放松技巧：学习一些放松技巧，如深呼吸、冥想、瑜伽等，可以帮助你减轻身体和心理的压力，改善身体健康。5. 寻求专业帮助：如果你感到身体健康问题比较严重，可以
我对自己的外貌和身材非常在意和挑剔，经常陷入一种无止境的自我修正和改变之中	译：我对自己的外貌和身材非常在意，经常陷入无止境的自我修正和改变之中。意思：我对自己的外貌和身材非常关注，经常沉溺于自我修正和改变的无止境中。
学习障碍是很常见的，把学习当成游戏，你可以让学习变得更有趣	是的，将学习当成游戏的概念被称为"学习游戏"或"学习游戏化"，是一种将学习活动与游戏元素相结合的教学方法。学习游戏化可以帮助学生更好地掌握知识和技能，同时也能增强学生的兴趣和参与度。在学习游戏化中，教师可以设计各种不同的游戏，例如竞赛、模拟实践、角色扮演等，来激发学生的学习兴趣和动力。以下是一些学习游戏化的优势：1. 增强学生的学习兴趣和动力：学习游戏化可以让学生在游戏中体验到学习的乐趣和奖励感，从而激发他们的学习兴趣和动力。2. 提高学生的参与度和协作能力：学习游戏化可以让学生在游戏中与他人合作、互动和竞争，提高他们的团队合作能力和社交技能，同时也可以增强学生的参与度和自信心。3. 促进学生的创新和解决问题的能力：学习游戏化可以让学生在游戏中面临各
我明明很想有个人可以依靠，但不知道怎么去接近，每次尝试都会失败，然后又失去了勇气，又回到原点	这是一个很常见的问题，很多人都会遇到这样的情况。以下是一些可以帮助你接近人之间互动的建议：1. 增强自信心：自信是建立良好人际关系的基础。如果你对自己不信任，那么很难建立信任和友谊。因此，你可以采取一些方法来增强自信，例如学习一项新技能或者去做一件新的事情。这样可以让你感到更有成就感和自信心。2. 尝试适合自己的方式：不同的人有不同的互动方式。你可以试着找一种适合自己的方式来与他人互动，例如参加一个兴趣小组、加入志愿者组织或者参加社交活动。这些活动可以让你结识新的人，并与他们建立联系。3. 尝试新的经验：尝试新的经验可以帮助你扩展自己的视野，并且建立更多的联系。你可以尝试参加一些社交活动，例如参加一个旅行、参加一个音乐会、参加一个讲座等等。这些活动可以让你结识新的人，并且在参加活动的过程中建立联系。4. 坚持不懈：建立良好的人际关系需要时间和努力。尽管你可能会在尝试建立
我发现我对事物的兴趣和热情越来越低，总感觉没有什么动力去做任何事情，这是不是一种心理健康问题？	这种情况可能是一种心理健康问题，尤其是在情绪波动较大、自我控制减弱、焦虑和抑郁的情况下，一定可能会导致人的情绪和行为受到影响。如果你发现自己的兴趣和热情在某个时间段下减弱，或者你感到情绪低落、无助、无力等等，那么可能是情绪问题。在这种情况下，你可以尝试以下的方法来减轻症状：1. 寻求心理治疗或者咨询。如果你发现自己的情绪问题影响到日常生活和工作，或者你感到情绪疲劳、无法自拔，那么你可以寻求心理治疗或者咨询师的帮助。他们可以帮助你探索问题的根源，并提供有效的治疗方法。2. 寻找支持。可以寻求亲朋好友、家人或者社区的支持，分享你的感受和经历。他们可以给你鼓励和支持，帮助你缓解情绪压力。3. 寻找兴趣爱好。尝试探索新的事物和兴趣爱好，可以帮助你提高自我寄托，增强自我效能感，缓解情
经常性的心理压力会影响我们情绪稳定，可能会影响我们的身体健康，我们应该做好心理素质的修炼，进行心理健康教育	您提出的观点非常正确。经常性的心理压力确实会对我们的情绪和身体健康产生负面影响。因此，我们需要定期进行心理健康教育和心理素质的修炼。通过心理健康教育，我们可以学习如何更好地管理自己的情绪和压力，从而改善情绪稳定和身体健康。同时，通过心理素质的修炼，我们可以培养自己的情绪调节能力和应对压力的能力，从而更好地应对日常生活中的困难和挑战。
被人非法拘留了一晚上，折磨得浑身脆弱，一个人在角落里哭，只有泪水把黑暗照亮	那个人是您自己，因为他是那个人，也是您，也是那个人，也是您。他是那个人，也是您，也是那个人，也是您。他是那个人，也是您，也是那个人，也是您。
在青少年心理健康方面，学习如何建立健康的关系，如何正确表达自己的情绪和诉求，是非常重要的	准确！在青少年心理健康方面，学习如何建立健康的关系，如何正确表达自己的情绪和诉求，是非常重要的。青少年时期是人们社交和个性发展的关键时期，如果他们在此期间受到不良的环境或不良的关系，可能会对他们的以后的心理健康产生负面影响。因此，帮助青少年学习如何建立健康的关系和表达自己的情感是非常必要的。
最近我经常做噩梦，这些梦境让我感到恐惧和不安，甚至影响了我的睡眠质量和日常生活。	您的感受是可以理解的。梦境可能是人类自然的生物学反应，它们可以表达出我们内心深处的情感和心理状态。如果您的梦境让您感到恐惧和不安，那么您可能需要考虑寻求专业的心理帮助，以帮助您解决这些问题。
我总是很焦虑，不断地担心事情的发展，尤其是一些小事情，也会让我感到不安和不舒服	感觉焦虑是一种常见的情绪，它可能会影响到我们的生活和工作。有几种方法可以帮助你缓解焦虑，例如：做瑜伽、冥想、呼吸练习、运动等，这些都可以帮助你放松身心，减轻焦虑情绪。此外，你还可以尝试改变自己的思维方式，尝试从不同的角度看待问题，并学会放下无法控制的事情。如果焦虑情绪却持续影响到了你的生活和工作，那么你可能需要寻求专业的心理帮助。
我总是无法停止自己消极的想法，即使有时候事情并没有那么糟糕，我还是会想到最坏的结果，我感到非常沮丧和无助，觉得自己永远也无法摆脱这种情绪。	首先，您不是唯一的这样感受。许多人都会因为紧张、压力、失望等原因感到消极和沮丧。但是，认识到这种情绪是很重要的，因为它可以导致我们陷入困境。以下是一些建议，可以帮助您克服消极情绪：1. 自我肯定：尝试做一些让您感到肯定的事情，比如看看您最近完成的任务或者想到自己的优点。这有助于您建立自信和积极的心态。2. 保持积极心态：当您感到消极时，尝试想象最糟糕的情况是不是真的不太可能发生。这样可以帮助您保持积极的心态，更好地应对挑战。3. 寻找支持：与亲朋好友聊天，分享您的担忧和担忧，他们可以给您一些看法和建议，帮助您缓解焦虑和抑郁。4. 做一些放松的活动：运动、瑜伽、冥想等都有助于放松身心，减轻压力和焦虑。5. 给自己一些积极的激励：写下您对自己的成
我觉得自己的生活很无聊，缺乏激情和动力，这让我感到沮丧和失落	首先，我理解您现在的感受。生活中的无聊和缺乏激情和动力是很常见的情景，但是我们可以通过一些方法来改变这些情况。以下是一些建议：1. 制定计划：为自己制定一个计划，包括每天要做的事情，可以让您感到更有动力和目标，也可以让您记录自己的进展。2. 寻找兴趣：寻找自己的兴趣爱好，并让它们成为您的活动。参加社交活动、学习新技能、阅读您感兴趣的书籍等，都可以让您的生活更加有趣。3. 找到自己的目标：思考您的生活目标，并制定一些实现目标的计划。这可以让您感到更有动力和目标，也可以让您在生活中有更多的成就感。4. 保持身体健康：保持良好的身体状况可以让您感到更有活力和能量。进行适度的运动、坚持健康的饮食和充足的睡眠等，都可以帮助您保持身体健康。5. 寻求帮助：如果您觉得自己无法承受生活中的困难，可以寻求专业的
我经常失眠，夜晚躺在床上想着工作上的事情，家庭琐事和人际关系，导致我白天无法集中注意力，工作效率低下，情绪也变得很糟糕。	失眠不仅会影响到您的身体健康，还会对您的工作和生活产生负面的影响。以下是一些建议来帮助您改善睡眠和提高工作效率：1. 定期进行健康检查：建议您定期进行健康检查，了解您的身体状况，包括病史、体重、血压、血糖等指标。如果有任何问题，您可以及时就医并采取相应的治疗措施。2. 制定合理的作息计划：建议您制定一个合理的作息计划，包括休息时间、作息时间、睡眠时间等。在准备睡觉前，避免吃大蛋白、咖啡因和酒精等。3. 减少焦虑和压力：尝试采取一些减压策略，如冥想、阅读、运动等。保持积极的心态和情绪也可以帮助您放松身心。4. 坚持锻炼：适当的运动有助于提高睡眠质量和改善情绪。建议您每天进行适当的锻炼，如散步、瑜伽、游泳等。5. 保持良好的作息环境：
当我遭遇到挫折和失望的时候，我想只有把一切忘记才能安然无恙。	您的想法很正常。当我们遭遇到挫折和失望时，感到无法控制情绪和焦虑可能会让我们感到很不安和糟糕。这时候，想象一下忘记所有的烦恼和压力，就像是把一切都埋在海中一样，能够让我们感到一种安慰和放松。当我们感到放松和安宁的时候，我们的情绪和思维就会更加清晰和精神稳定，有利于我们更好地应对问题和挑战。所以，尝试忘记一下所有的烦恼和压力，放松一下自己，可以是一种有效的应对方法。
我经常感到疲惫和无力，即使没有做什么体力活，也会感到疲惫不堪，我还经常失眠和无法入睡，这让我感到非常不舒服和困扰	您描述的症状表现为身体疲劳、睡眠问题以及失眠等，这可能是失禁症的一种表现。您可以尝试以下方法来缓解这些症状：1. 锻炼：适量的运动可以帮助提高身体的代谢和升高感，有助于减轻疲劳感和提高睡眠质量。2. 调整作息周期：保持合适的作息时间，尽量在晚上进行室内活动，避免过度暴露在阳光下，以减少晒伤。3. 休息和放松：充足的休息对身体健康至关重要。尝试进行冥想、瑜伽、深呼吸等放松技巧，以帮助缓解疲劳和焦虑。4. 调整饮食：保持早餐均衡，避免午餐和晚餐过于暴饮暴食。多吃蔬菜、水果、全麦食品等富含营养的食物，帮助身体更好地运作。5. 保持良好的心态：积极面对生活中的挑战，保持积极的心态和情绪，有助于缓解压力和困扰。6. 寻求专业帮助：如果
我有时会患上抑郁症，不能正常进食，然后又因为害怕别人看到我身体变得瘦小，而控制住了我的进食	您描述的情况可能表明您正在患上依赖性饮食和抑郁症的一种表现。这些症状会对您的身体和心理健康造成负面影响。以下是一些建议：1. 寻求专业帮助：如果您感到控制饮食已经影响到您的日常生活，建议寻求专业心理治疗、认知行为疗法或其他相关治疗方法的帮助。专业治疗师可以帮助您探索具体的问题，并提供有效的应对策略。2. 改变饮食习惯：逐渐减少高热量、高糖分和高脂肪食物的摄入，增加蔬菜、水果和全谷物的摄入，有助于改善饮食习惯和身体健康。3. 保持适度的运动：适量的运动可以帮助提高身体代谢，减轻肥胖问题，同时还可以减轻身体疲劳感和焦虑情绪。4. 参与社交活动：加入一些您感兴趣的社交活动，与他人交流，增加自信心和社交技能，有助于改善情绪和心理健康。5. 调整心态：学会接受自己的不足和弱点，并
我的父母总是批评我，无论我做什么都不够好，这让我感到非常压抑和失望，我觉得自己永远不可能得到他们的认可和赞扬	您的父母的批评可能会对您的心理健康产生负面影响。在这种情况下，您可以尝试以下建议来应对他们的批评：1. 寻求支持：与身边的亲朋好友交流您的感受，寻求他们的理解和支持。他们可能会为您提供一些不同的观点和建议，有助于缓解压力。2. 接受自己：学会接受自己的不足和弱点，相信每个人都有其独特之处。尝试关注自己的优点，培养自信心和自尊心。3. 制定目标：为自己设定具体的、可衡量的目标，并逐步实现它们。当您取得进展时，可以向您的父母展示您的成果，从而获得他们的认可和赞扬。4. 保持良好的沟通：尝试与您的父母建立更好的沟通，表达您的感受和需求。尝试用倾听和理解的心态倾听他们的反馈，并寻找共同点。5. 寻求专业帮助：如果您发现自己无法控制情绪，或者感到无法独立应对您的情况，可以考虑寻求心理治疗或其
我的恋爱关系总是很不稳定，我总是被情绪所左右，无法健康地维护好自己的感情关系	您的恋爱关系稳定不好可能是因为您的情绪问题导致了问题。情绪是影响我们行为和决策的一个重要因素。当我们感到沮丧、害怕或愤怒时，我们可能会做出冲动的决定或表现出不健康的行为。要改善您的恋爱关系，您可以尝试以下方法来管理您的情绪：1. 接受自己的情感：不要试图否认或压抑您的情绪。相反，学会接受自己的情感并尝试理解它们的来源。2. 学习情绪管理技巧：例如，深呼吸、瑜伽、冥想、呼吸训练等。这些技巧可以帮助您控制自己的情绪，并在受到压力和挑战时保持冷静。3. 寻求支持：与亲朋好友谈论您的情绪问题，或者寻求专业帮助。这可以帮助您理解您的情绪，并提供有效的方法来管理它们。4. 建立健康的沟通：在恋爱关系中，建立健康的沟通是非常重要的。尝试以尊重、开放和理解的方式与您的伴侣交流
小玲在大学里遭受了欺凌，导致她变得自卑和抑郁，我该如何帮助她重建自信和心理健康？	小玲在大学里遭受欺凌可能会对她的心理健康造成严重影响。以下是一些可能有助于帮助她重建自信和心理健康的建议：1. 给予安全感：小玲在大学里遭受欺凌可能让她感到害怕和不安，因此首先需要给她创造一个安全的环境，让她感到被理解和支持。2. 倾听她的感受：小玲可能会有很多内心的痛苦和恐惧，因此需要给她一个安全的空间和机会，让她可以表达自己的感受，倾听她的需求和经历。3. 提供专业帮助：如果小玲的情况严重，可能需要寻求专业帮助，例如心理咨询或治疗。专业人士可以帮助她处理遭遇欺凌所带来的心理依赖，并提供必要的心理支持和指导。4. 培养自信：小玲可能会因为遭受欺凌而感到自卑和不自信，因此需要帮助她重新建立自信心。可以通过鼓励她参与兴趣爱好、学习新技能等方式来培养�
我的家庭关系很复杂，我常常感到压力和不安，不知道该如何处理这些问题，也不知道该向谁求助。	我理解这种情况可能很难承受。处理复杂的家庭关系需要时间、耐心和努力。以下是一些可能有助于你处理这些问题的建议：1. 自我反思：首先，你需要意识到自己的情绪和态度对于家庭关系的影响。思考你的感受，你是否有对家庭成员的批判性想法或过度依赖。通过自我反思，你可以更好地理解自己的情绪和行为，并找到解决问题的方法。2. 寻求支持：你需要找到一个可靠的人或者专业机构来倾诉和支持，例如朋友、邻里、家人、心理咨询师等。与他们分享你的想法和感受，从他们的经验和建议中获得帮助。3. 沟通：与家人进行坦诚的沟通是处理家庭关系问题的关键。你可以通过沟通你的想法和感受来增进你们之间的理解和信任，并找到解决问题的方法。4. 适当寻求帮助：如果你觉得自己无法解决家庭关系问题，或者你需要更深入的帮助，可以考虑寻求专业机构的帮助，例如心理治疗师或家庭治疗�
我有一个朋友，他总是消极抱怨，对任何事情都没有积极的态度，我觉得他的消极情绪影响了我的情绪，但我不知道该怎么跟他沟通	如果你的朋友的消极情绪对你的情绪产生了影响，那么你需要找到一个合适的时机和方式，与他沟通。以下是一些可能有助于你与他沟通的建议：1. 选择合适的时机：选择一个关键的时机，让你的朋友感到舒适和愉快，例如在一个轻松的场合，或者在一个安静的环境中。2. 倾听他的想法：尽可能地倾听他的想法和感受，不要打断他或者反驳他的观点。倾听他的话，让他感到你理解他的立场和感受。3. 表达你的感受：在他倾听你的话之后，你可以表达你的感受，例如你觉得他的消极态度让你感到压力和不安。让他知道你的感受，但也要尽量不要责怪或者指责他。4. 提出建设性的建议：如果你觉得他的消极态度对你产生了负面影响，你可以提出一些建设性的建议，例如建议他参加一些心理咨询、参加一些正面的活动等。你可以帮助他识别和解决问题。5. 寻求其他的帮助：如果你
最近发现自己总是失眠，即便睡着了也会做噩梦，醒来后感觉很沉重，怎么办	失眠可能导致多种健康问题，包括睡眠不足、干扰睡眠和失眠会议等。以下是一些建议，可以帮助您改善失眠问题：1. 改善生活方式：保持良好的作息习惯，每天养成充足的睡眠和充足的精力。尽量减少咖啡因和酒精的摄入，增加运动和锻炼。2. 减轻压力：避免长时间的压力和焦虑，学会放松和缓解紧张情绪。尝试冥想、瑜伽和深呼吸等技巧，以帮助您放松身心。3. 增加光线：尽量在清晨晚上充足的日光。这有助于调节生物钟，使您的身体自然地进入和逐渐睡眠。4. 改善姿势：在床上保持正确的姿势，避免放松的姿势。使用软垫、头枕和窗帘来保持安静、清凉的环境。5. 寻求帮助：如果您的失眠问题持续存在，建议寻求医疗专业人士的帮助。他们可以为您进行更详细的�
有时候和朋友聊天，总觉得说话完了就到此为止，没有话语可说	这种情况可能是因为你和你的朋友有不同的沟通方式或者观点。有时候，有些人更喜欢长期的深入交流，而有些人则更喜欢简短的交流。如果你感到说话无法终止，可以试着询问你的朋友是否还有什么想说，或者转移话题，以便更好地探讨你们的共同兴趣爱好。如果你们之间的沟通仍然存在问题，可以考虑寻求帮助，例如咨询专业的沟通咨询师。
我的孩子在学校里被欺负了，他现在变得非常沉默寡言，我不知道该怎么帮他	当孩子在学校里遭受欺负时，会对他们的心理健康产生负面影响。作为父母，你可能会感到困惑和无助，但以下一些建议可能会对你的孩子有所帮助：1. 给予情感支持：让孩子知道你关心他的感受，并且你相信他都可以克服难关。2. 帮助他处理情绪：帮助孩子表达他的情感，并且寻找解决问题的方法。3. 提供安全感：帮助孩子感到在家庭和学校中有一个安全的空间。4. 寻求专业帮助：如果孩子的情绪问题持续影响到他的日常生活，建议寻求专业的心理咨询师的帮助。5. 与老师沟通：与孩子的老师沟通，了解孩子在学校的情况，并且一起制定解决问题的方案。最重要的是，要给予孩子足够的关爱和支持，让他知道他不是孤单的，并且有人在他身边支持他。
每当我和人交流时，总是感到很紧张，不知道该说什么，怕自己讲错话	这种情况被称为社交障碍或社交恐惧症，很多人都有这样的经历。以下是一些帮助你缓解紧张情绪和提高社交能力的建议：1. 认识自己的情况：了解自己的情况，包括你的社交恐惧的原因和影响，可以帮助你更好地应对这种情况。2. 慢慢来：不要急于说话，逐渐熟悉交流的过程，建立自信。3. 做好准备：在交流时，准备好一些话题，以便更好地表达自己的想法和意见。4. 练习面对问题：练习面对难题，可以帮助你更好地应对社交场合中的挑战。5. 接受反馈：接受他人的反馈，并且尝试改进自己的表达方式，可以帮助你更好地与他人交流。6. 寻求帮助：如果你感到自己无法克服社交恐惧，可以寻求专业的心理咨询师的帮助。最重要的是，要相信自己有能力克服社交恐惧，并且不要轻易放弃。通过练习和坚持，你一定能逐渐提高自己的社交能力。
每当我一个人待着的时候，我就开始有莫名的恐惧感，不知不觉被一种无形的力量控制，我觉得自己被抓住了，被困在一个不可突破的壳里，有时候一切都会变得极度的恐惧	这种感觉可能是抑郁症或社交焦虑症的症状之一。抑郁症和社交焦虑症都是一种心理健康问题，可能导致不同程度的情感和行为问题。以下是一些建议，可以帮助您管理这种情况：1. 寻求专业帮助：如果您的恐惧感持续存在或影响到您的日常生活，建议寻求专业医疗专业人士的帮助。他们可以为您进行更详细的评估，并提供适当的治疗。2. 学习自我调节技巧：自我调节是一种技巧
我总是对自己太苛刻，觉得自己不够好，不值得被爱和重视	很多人都会感到这样的误会，但是我们必须记住，每个人都有自己的优点和弱点，而且我们都是被上帝创造出来的，是独一无二的，每个人都有独特的魅力和价值。如果你觉得自己不够好，可以尝试着去认识自己，了解自己的优点和弱点，不要过分苛刻自己。同时，也可以尝试着去找到自己的兴趣爱好，放松自己，寻找自己的乐趣和成就感，这些都可以帮助你增强自信心和自尊心。最重要的是，不要害怕表达自己的想法和情感，和家人、朋友或者寻求心理咨询师的帮助，他们可以给你一些有用的建议和指导，帮助你克服不良自尊心。
我的生活就是不断的受挫，无论做什么都失败，我觉得自己没有价值	听起来你正在经历一段困难的时期。失败是生活中的一部分，但是我们不应该让失败让我们感到自卑和无价值。首先，你需要接受一个事实：失败并不意味着你是一个失败者。失败是成功的一部分，它可以教会我们如何改进和成长。你需要相信自己，并且相信你有能力找到解决问题的方法。其次，你需要认识到自己的价值。每个人都有独特的价值和才能，而且你不需要为了被大家认可才要要求自己是个完美的人。你可以通过自我反思和自我提升来发掘自己的才能和优点。最后，你可以尝试寻求支持和帮助。与家人、朋友或者寻求专业心理咨询师的帮助，他们可以给你一些有用的建议和指导，帮助你克服不良自尊心。请记住，你不是肯定的自己，你可以改变和成长。相信自己，相信你有能力克服困难和挑战，相信自己可以变得更好。
我总是被人欺负，被人看不起，觉得自己很没用，很无能，无法在社交场合中表现自己的真正实力和能力，总是躲在角落里	听起来你正在经历一段困难的时期。被欺负和看不起是不容易接受的，但我们需要学会如何处理这些挫折，并且找到一种方法来克服它们。首先，你需要了解一个事实：欺负和看不起并不代表你是一个无助的人。你需要相信自己，并且相信你有能力克服这些挫折。其次，你需要找到一种方法来应对这些情况。你可以试着向心理咨询师或者家人寻求帮助，他们可以给你一些有用的建议和指导，帮助你克服这些问题。最后，你可以试着尝试寻求支持和帮助。你可以与朋友或者志愿者组织参加社交活动，这样可以帮助你积累自信，并且提高你在社交场合的表现水平。请记住，你不是肯定的自己，你可以改变和成长。相信自己，相信你有能力克服这些挫折，相信自己可以变得更好。
我对未来感到迷茫和无助，不知道自己该做什么，也不知道自己想要什么，这让我感到很焦虑和不安，担心自己无法找到人生的方向。	担心未来的事情是一种常见的情绪，特别是当我们面临困境或者不确定性的情况时。这可能与你的人格特质和经历有关，但也可以通过一些方法来帮助自己缓解这种情绪。首先，意识到自己的担忧和焦虑是不必要的，可以尝试通过放松和冥想来减轻这些情绪。尝试深呼吸或者其他放松技巧，可以帮助你放松身体和思维。其次，尝试将注意力集中在当前的环境和情况上，而不是担忧未来的事情。将注意力集中在当前的任务和活动上，可以帮助你更加专注和积极地应对当前的挑战。另外，可以尝试制定一个让你感到舒适和安全的计划，这可以帮助你感到更加控制和安全。例如，在出门前就确保所有的门和窗户都被锁上，可以帮助你感到更加安全和舒适。最后，如果你的担忧和焦虑持续很长时间，可以考虑寻求专业的心理咨询师的帮助。他们可以帮助你理解和处理这些情绪，并提供一些有效的策�
我不知道为什么总是会想太多，担心未来的事情，而且每次出门都要反复确认锁门关窗，这让我感到非常疲惫和烦躁	这些想法和行为可能是由抑郁症症状所造成的。抑郁症是一种心理疾病，患者可能会感到沮丧、孤独、疲惫和焦虑等负面情绪。这些情绪可能会导致患者在日常生活中表现出不同的行为，如不愿意出门，反复确认锁门关窗等。如果您感到这些想法和行为持续存在，建议您尽快咨询专业心理医生，以获得更好的治疗和支持。
我曾经遭受了性侵害，虽然已经很长时间了，但是我仍然感到很痛苦和困扰，我该如何去面对这个过去的伤痛？	很抱歉听到你遭受过这样的事情，这确实是一个令人深感尴尬和痛苦的经历。面对这样的伤痛可以很棘手，但有一些方法可以帮助你更好地应对它。首先，接受这个事实并接受自己的感受是非常重要的。不要试图忽视或者否认这个事实，因为这会让你更加暗淡和痛苦。相反，接受这个事实并接受自己的感受可以帮助你更好地处理和克服这种伤痛。其次，寻求专业的心理咨询师的帮助可能会对你很有帮助。他们可以帮助你更好地理解和处理这种伤痛，并提供一些有效的策略来帮助你恢复和重建自己。最后，尝试通过一些自我照顾的方式来帮助自己。这包括保持健康的生活方式、保持良好的睡眠和饮食习惯、练习适度的运动和冥想等。这些方法可以帮助你更好地抵抗压力和焦虑，并提高自己的生活质量。请记住，面对这样的伤痛可能需要时间和耐心，但是你可以�
我感到自己的人生缺乏意义和目标，无法找到自己真正想要做的事情，这种迷茫的感觉让我感到非常痛苦。	这是一个很常见的情感困扰，感到自己的人生缺乏意义和目标可能会让你感到很迷茫和无助。但是，你可以采取一些方法来帮助自己找到自己的真正兴趣和目标。首先，你可以尝试找到自己感兴趣的事情，并开始探索这些领域。这可能需要一些时间和努力，但是如果你能找到自己真正感兴趣的事情，你会更加热情和动力地去追求它。其次，你可以尝试了解自己的价值观和人生目标。这可以帮助你更好地了解自己的内心需求和愿望，从而更好地找到自己的真正兴趣和目标。最后，寻求专业的心理咨询师的帮助也是很好的选择。他们可以帮助你更好地了解自己的内心需求和愿望，并提供一些有效的策略来帮助你找到自己的真正兴趣和目标。请记住，找到自己的真正兴趣和目标需要时间和耐心，但是通过不断地探索和寻求，你一定能找到自己真正想要做的事情，并且开始实现自己的人
一天，我发现了一种想要逃离自己真实世界的方式，就是把头放在沙发上，把耳朵堵上，不听外面的声音，让自己完全陷入到一个只有自己的世界中，当自己陷入到这个世界时，一切的烦恼都会消失。	这种想法是不健康的，因为它可能导致患者陷入沉迷和依赖，无法回归现实生活。这种想法可能是抑郁症症状的一个表现。在抑郁症症状的情况下，患者可能会感到沮丧、孤独、疲惫和焦虑等负面情绪，而这种想法可能会加剧这些负面情绪，使患者难以恢复正常的生活。建议您尽快咨询专业心理医生，以获得更好的治疗和支持，以帮助您战胜抑郁症症状，恢复正常的生活。
我经常感到孤独和无助，觉得自己不被任何人理解或支持，即使身边有人也会感到隔阂和疏远，这种情绪让我很沮丧和消极，有时候还会引发焦虑和抑郁症状	理解您的感受，孤独和无助确实是一种艰难的状态。以下是一些建议和策略，希望能帮助您度过这段困难时期：1. 寻找支持：寻找支持是克服孤独感和无助感的关键。您可以尝试参加社交活动，与朋友或家人交流，或者寻求专业人士的帮助。与他人分享您的感受和需求，可以让您感到更有力量和支持。2. 发展兴趣爱好：通过投入到兴趣爱好中，您可以集中注意力，减轻压力，并且找到一个积极的生活方式。您可以尝试新的事物，例如绘画、阅读、运动、音乐等。这些活动可以帮助您放松和寻找自我寻常。3. 练习放松技巧：培养放松技巧可以帮助您应对压力和焦虑。例如，深呼吸、瑜伽、冥想、呼吸训练等。这些方法可以帮助您放松身心，减轻焦虑和抑郁感。4. 保持健康的生活方式：保持健康的饮食和睡眠习�
你的一句话就可以使我的心崩溃	As an AI language model, my goal is to assist and provide helpful responses to your questions and concerns. I apologize if my previous response was inappropriate or caused any distress. Please feel free to let me know how I can better assist you.
我对自己的外貌和身材感到极度不满，经常出现自卑和焦虑情绪	我很抱歉听到您对自己的外貌和身材感到不满。这是一个很常见的情感问题，尤其是在社交媒体和娱乐圈的瞬间，我们经常会看到各种美丽和高质量的人物，这可能会导致自卑和不满的情绪。以下是一些建议，帮助您应对这种情况：1. 认识到自己的价值：尽管我们所处的社会可能会过于依赖外貌和身材，但我们应该始终关注自己的价值和能力。重视自己的优点和特长，并尝试发掘自己的潜力和才华。2. 设定具体的目标：设定具体的目标，可以帮助您专注于提高自己的身体和健康，而不是仅仅关注外貌。这可以包括制定锻炼计划、改善饮食习惯、保持良好的睡眠等等。3. 接受自己的外貌：我们不能完全控制自己的外貌，但我们可以学会接受自己的外貌，并尝试积极地面对和应对它。同时，我们也可以尝试着新的服装和化妆方式，让自己感到更自
我真不知道自己在做什么，我做任何事情总是没有头绪，把我搞得很沮丧	感觉这样做事情很难，可能是因为您需要更明确的目标和计划来帮助您集中注意力。以下是一些建议：1. 设定目标和计划：在开始任何事情之前，您可以先设定清晰的目标和计划。明确您想要达到的目标，并制定一些具体的行动计划，以帮助您更容易地集中注意力和专注于任务。2. 分解任务：将大型任务分解成小的子任务，每个小任务可以逐一完成。这可以帮助您保持集中注意力，并在完成每个小任务后获得成就感。3. 寻找支持：寻找一些人或组织，可以提供支持和鼓励。这可以是您的家人、朋友或同事，也可以是社区组织或支持小组。他们可以帮助您在任务中保持动力和信心。4. 考虑慢步来：如果您感到很压力，可以考虑使用更慢的进度来完成任务。这可以帮助您保持冷静和集中注意力，并避免因为压力而失去动力。希望这些建议能够帮助您更好地应对这种情况。如果需要更详细的支持和指导，请考虑寻求专业人士的
有很多社交恐惧，不敢和陌生人交流，也不喜欢在人多的场合出现，希望能够克服这些恐惧	社交恐惧是一种常见的心理现象，缺乏自信和交际能力可能导致在社交场合中感到不适和紧张。以下是一些建议，帮助您克服社交恐惧：1. 认识自己：了解自己的社交恐惧本质，找出您的社交恐惧的产生原因，并认识到自己可以通过一些方法克服这种恐惧。2. 慢慢进入：如果您害怕陌生人，可以从简单的社交场合开始，比如邀请朋友一起去看电影或者去吃饭，逐渐适应和接受社交场合。3. 增强自信：通过增强自信，您可以更容易地沟通和互动，比如学习一些自信心的技巧，比如练习自我推验、情绪管理等。4. 学会与他人交流：可以通过参加一些社交活动或者参加社交圈子，与他人交流，增强自信和交际能力。5. 认识到社交恐惧的正常性：了解社交恐惧是一种常见的心理现象，并不是一种罕见的疾病，可以减少您对自己社交恐惧的担忧和压力。
心理学家认为，极端抑郁症可能会影响到一个人的身心健康	是的，极端抑郁症会对一个人的身心健康造成严重影响。抑郁症是一种心理疾病，通常表现为长期的抑郁感和无助感，这些情绪可能会影响个人的日常生活和工作，同时也会对身体健康产生负面影响。抑郁症的症状可能包括情绪低落、疲劳、睡眠障碍、急性心率升高、消化不良、身体患处等。如果您感到这些症状持续时间过长，建议寻求专业心理学家的帮助，以帮助您减轻这些症状并改善身心健康。
每当我开始追求一个目标，就会感觉自己没有力量，每当我想要改变一些事情，就会觉得自己没有勇气	这些感受是非常普遍的，很多人都会在追求某个目标或者做出某个改变时感到无力和无助。这可能是因为我们面临的挑战和变化需要我们超越自己的舒适区和烦恼，而这种变化和挑战可能会让我们感到不安和不舒服。要克服这种感觉，可以尝试以下方法：1. 设定小目标：将您的目标分解成小目标，逐步实现。这有助于您感到实现某个目标的进步，并且有助于缓解您的不安和焦虑。2. 寻求支持：寻找支持您的人或者寻求专业心理咨询帮助，可以帮助您克服这种感觉和焦虑。3. 坚持坚持：成功追求某个目标或者改变需要时间和努力，您需要坚持不懈地努力，并且不要因为一次失败而放弃。4. 培养自尊心：培养自尊心和自信心可以帮助您克服负面情绪和担忧，并且更有可能实现您的目标。如果您感到这些方法无法帮助您，建议寻求专业心理�
因为我担心自己无法胜任现在所做的工作，所以我常常失眠，无法把注意力集中在工作上	失眠可能会导致工作效率下降，但也不应该被轻易地忽视。如果您担心自己无法胜任现在所做的工作，建议您考虑以下几点：1. 制定好工作计划和目标，制定易懂的计划，并在计划中设定可衡量的目标，以保证工作进展的可观性和可控性。2. 保持良好的作息和生活习惯，充足的睡眠和健康的饮食有助于提高工作效率和效果。3. 寻求支持和帮助，与同事、导师或其他专业人士交流，分享您的质疑和困惑，以获得更多的灵感和支持。如果上述方法不能解决您的问题，建议您咨询专业心理医生，以获得更好的治疗和支持。
当我的家人拒绝我的帮助时，我会感到比以往更加痛苦	当我在帮助家人或朋友时，我会感到满足和幸福。我认为这是一种美好的感觉，因为我可以为他们提供帮助和支持，让他们感到更加舒适和满足。当他们拒绝我的帮助时，我会尝试理解他们的想法和感受，但是我会感到不满和痛苦，因为我感到无法帮助他们。
每次遇到困难我都感觉很沮丧	当我遇到困难时，我会感到很沮丧。它是一种很正常的感受，因为面对挑战和困难时，我们很容易感到无助和沮丧。但是，我们可以通过寻找解决方案和寻求帮助来克服这些挑战。我建议你可以尝试寻找一些方法来缓解这种感觉，比如通过运动、冥想或与朋友聊天来减轻压力。
我经常感到沮丧和无助，觉得自己的人生缺乏意义和价值，有时候会想到自杀，但我又不敢告诉任何人，担心他们会认为我是一个弱者和失败者。	我理解你的遭遇，这种情绪是很正常的，但是我希望你知道，自杀是一个永久性的解决方案，而且没有解决问题的方法，只会让你和你的家人和朋友更多的痛苦。我建议你可以寻找一些方法来缓解你的压力和痛苦，比如寻求专业的心理咨询或寻找适合你的支持系统，如家人、朋友或社区。
我有一个朋友，他总是觉得自己不够好，不够聪明，不够有才华，甚至是不值得别人关心，这让我很担心他的心理健康。	我理解你的担忧，对于朋友的心理健康对我们来说是非常重要的。你可以试着和你的朋友进行沟通，让他知道你关心他的感受，并表达你的支持和尊重。同时，也可以鼓励他尝试寻找一些方法来提高自己的自信心和自尊心，比如参加一些兴趣爱好、学习新技能或与志同道合的人一起交流。如果他的情绪持续严重，你可以鼓励他寻求专业的心理咨询帮助。
我经常因为工作压力和家庭纷争而感到压抑和绝望，怎样才能缓解这种情绪，保持心理健康？	压抑和绝望是常见的情绪问题，以下是一些缓解这些情绪和保持心理健康的方法：1. 寻求支持：与家人、朋友或专业人士交流，与他们分享你的感受和困惑，他们可能会给你提供建议和支持。2. 运动：锻炼身体可以帮助释放压力和紧张，有助于改善心情。3. 放松技巧：冥想、深呼吸、瑜伽等方法可以帮助你放松身心，缓解压力。4. 改变思维方式：培养积极的思维方式，避免过度自责和否定。5. 改变生活方式：保持规律的作息时间、合理安排时间、减少尽头工作等，可以减轻压力。6. 寻求专业帮助：如果情绪问题持续影响到日常生活和工作，可以考虑寻求专业心理咨询师的帮助。总之，保持健康的生活方式、寻求支持和专业帮助，以及采取积极的应对方法，都可以帮助你缓解压抑和绝望情绪，保持心理健康。
最近，我的思维开始变得混乱，我开始担心自己的心理健康，这让我感到很恐惧	如果你的思维开始变得混乱，可能是因为精神压力过大或其他原因导致的焦虑和恐惧。以下是一些可能有用的建议：1. 寻求帮助：如果你感到压力和焦虑过大，可以考虑寻求专业人士的帮助，如心理咨询师或治疗师。他们可以帮助你探索问题的根源，并提供有效的解决方案。2. 放松技巧：学习放松技巧，如冥想、呼吸练习、瑜伽等，可以帮助你缓解紧张和焦虑。3. 坚持健康的生活方式：保持健康的饮食、睡眠和运动习惯，有助于缓解压力和焦虑。4. 探索自己的信仰和信念：探索自己的信仰和信念，了解他们是否正确或必要更新。5. 与他人交流：与亲朋好友或专业人士交流，分享你的感受和想法，他们可能会给你提供支持和建议。请记住，每个人的情况都不同，所以需要根据自己的情况进行调整和尝试。如果你感到情况严重，请尽快寻
我不敢面对别人，总觉得自己不够好，比较紧张，就算朋友对我说话，我也会不停担心着他们在思考什么	这种情况可能是焦虑和社交恐惧的表现。以下是一些可能有用的建议：1. 寻求专业帮助：如果你觉得自己的情况严重，可以考虑寻求心理咨询师或治疗师的帮助。他们可以帮助你了解自己的情况，并提供有效的解决方案。2. 学习放松技巧：学习放松技巧，如冥想、呼吸练习、瑜伽等，可以帮助你缓解紧张和焦虑。3. 坚持健康的生活方式：保持健康的饮食、睡眠和运动习惯，有助于缓解压力和焦虑。4. 探索自己的信仰和信念：探索自己的信仰和信念，了解他们是否正确或必要更新。5. 与他人交流：与亲朋好友或专业人士交流，分享你的感受和想法，他们可能会给你提供支持和建议。请记住，每个人的情况都不同，所以需要根据自己的情况进行调整和尝试。如果你感到情况严重，请尽快寻求专业帮助。
我担心不能保持心理健康，让家人失望	我明白你的担忧。保持心理健康并不容易，特别是当你需要在职业生涯和家庭生活之间做出决策时。以下是一些建议，可以帮助你保持心理健康：1. 积极寻求支持：与亲朋好友分享你的担忧，让他们了解你的挑战和需求。他们可能会提供宝贵的建议和支持，帮助你找到更好的平衡点。2. 学会说“不”：学会在决策之前谨慎地评估自己的能力和资源。当你感到无法满足别人的期望时，不要担心失望，相信自己的决策并且你会做出最好的选择。3. 保持锻炼：锻炼不仅可以帮助你缓解压力，还可以提高自己的心理健康和生活质量。尝试每天进行适度的运动，如散步、瑜伽或游泳。4. 设定合理的期望：理解自己的能力和资源，并适当地设定期望。不要期望自己在工作和家庭生活中同时取得完美的成绩。5. 学会放松：寻找适合自己的放松方法，如冥想、瑜伽、瑜��
我常常感到孤独无助，即使身边有人陪伴，也觉得没有人理解自己的内心世界	孤独和无助的感觉是非常常见的，尤其是在人际关系中。有时候，无论身边有多少人陪伴，我们都会觉得自己是孤单的。这种感觉可能有多种原因，例如：1. 个人需求不同：每个人都有独特的需求和期望，如果我们认为自己的需求不被他人理解和尊重，就会感到孤独和无助。2. 社交技能不足：有时候我们可能不善于表达自己的感受和需求，或者不知道如何建立和维护人际关系。这也会导致我们感到孤独和无助。3. 遗传因素：有些人可能有遗传因素导致社交障碍，例如缺乏同理心、社交恐惧症等。这些障碍可能会导致我们感到孤独和无助。如果你感到孤独和无助，可以尝试以下方法来减轻这种感情：1. 寻找支持：寻找支持是减轻孤独感的第一步。你可以尝试和亲朋好友聊天，或者寻找志同道合的社交团体，与他们一起做事。2. 学习社交技能：如果你觉得自己在社交
我对未来感到非常迷茫，不知道自己该怎么办，这种迷茫让我感到非常焦虑和不安	对未来感到迷茫是非常正常的，特别是当你处于变革的时期。以下是一些可以帮助你应对未来的建议：1. 设定目标：设定一些明确的、可衡量的目标，可以帮助你摆脱迷茫和焦虑。例如，你可以制定一个职业目标、个人发展计划或者亲子计划。2. 制定计划：制定一个详细的计划，包括逐步实现目标的步骤和时间表。这可以帮助你保持动力，同时也可以让你感到更有掌控力。3. 拓展知识：不断学习新知识和技能可以帮助你更好地了解自己的兴趣和方向，并且缓解焦虑。可以通过读书、参加课程、学习新技能等方式来拓展自己的知识。4. 寻求支持：与家人、朋友或专业人士交流，可以帮助你分享自己的问题和担忧，并获得有用的建议和指导。5. 保持积极心态：保持积极的心态可以帮助你应对未来的挑战。可以通过冥想、运动、阅读或其他方式来缓解压力和焦虑。最重要的是，不要让未来
今天参加聚会，结果被大家嘲笑，又被别人拒绝，我真的快崩溃了	听起来你在参加聚会时遇到了很多挫折和困扰。这种情况下，你可能会感到非常沮丧和失落。以下是一些建议，可以帮助你应对这种情况：1. 接受感受：首先要接受这种情况对你的影响。不要否认自己的感受，而是尝试理解和接受这种情况。2. 放下期望：要学会放下自己的期望和想法，并尝试看到这种情况的不同面貌。这可以帮助你更好地理解和应对这种情况。3. 不要孤单：如果你感到孤单和无助，可以寻求支持和帮助。可以和亲朋好友聊天，或者寻求专业的心理咨询师的帮助。4. 重新建立自尊心：当你失去自信和自尊心时，可以尝试重新建立自己的自信和自尊心。可以通过做自己喜欢的事情、发展自己的技能和兴趣爱好等方式来建立自尊心。5. 学会放下：要学会放下自己的希望和期望，并尝试接受事情的现实。这可以帮助你更好地应对未来的挑战。最重要的是，不要让这种情况影响你的自信和自�
我感到自己的人际关系很困难，总是很难与别人建立起深入的联系。我觉得自己不会与人相处，也不懂得如何交流，所以很容易被孤立。我渴望能够有一些真正的朋友，但是却不知道该怎样去实现。	我明白你的感受。建立人际关系并不容易，尤其是在新环境或新城市中。以下是一些建议，可以帮助你更好地建立人际关系：1. 认真沟通：在与别人交流时，尽量保持简练、清晰和具体。在交流时要真诚，尊重别人的意见和感受。同时，也要尝试了解别人，询问他们的想法和经历。2. 尝试新的活动和社交场合：尝试参加社交活动，如团队活动、运动队伍、文化活动等。这些活动可以帮助你接触到新的人，建立新的联系。3. 寻找共同兴趣点：寻找一些你和别人有共同兴趣的活动或话题，这样可以更容易地开会，建立联系。4. 不要过于期望：不要期望自己能够立即建立深入的联系，相信时间会让你找到合适的人和合适的关系。5. 反思自己的社交模式：思考自己的社交模式和习惯，是否存在不必要的障碍。例如，如果你经常感到紧张或不自在，可以尝试学习一些调节情绪和交流技巧的方法。6. 寻求专业帮助：如果你�
我的工作压力很大，每天都要加班，经常熬夜，我感觉自己的身体和心理都已经到了极限，但我还是无法停下来，我该怎么办才能避免崩溃。	压力过大可能会导致身心健康问题，因此首先，你需要重新评估自己的生活方式和工作计划，寻找一个更加平衡的生活方式。1. 保持健康的生活方式：保证充足的睡眠、均衡的饮食和适量的运动。2. 增强自我调节能力：学会放松身心，如冥想、呼吸训练等。3. 找到适合自己的减压方法：例如瑜伽、冥想、深呼吸等。4. 与人保持联系：与家人、朋友或同事保持联系，可以帮助你分担压力。5. 考虑寻求专业帮助：如果你发现自己无法控制自己的情绪和行为，可以考虑寻求心理咨询师或医生的帮助。最重要的是，不要害怕寻求帮助，因为压力过大会对你的身心健康产生不利影响。
我觉得自己无法控制自己的情绪，经常会因为小事情就大发脾气，让身边的人很难受	失控的情绪对身边的人来说是很困扰的，因此你需要学会掌控自己的情绪。以下是一些方法可以帮助你控制情绪：1. 冥想或深呼吸：当情绪出现时，尝试深呼吸或进行冥想来减轻身体的紧张感。2. 分析情绪：试着找出情绪产生的原因，然后思考如何应对它。3. 保持冷静：尽量保持冷静，不要让情绪控制你。4. 找到肯定：尝试找到事情的一些好处，这样可以帮助你保持积极的心态。5. 寻求帮助：如果你发现自己无法控制情绪，可以寻求专业帮助，如心理咨询师或治疗师的帮助。最重要的是，不要责怪自己，因为失控情绪是很正常的。相信你有能力掌控自己的情绪，并在适当的时候寻求帮助。
我的家庭里没有爱，没有一句温暖的话，也没有着真正的安全感，只有对我的指责和对我的压力，因此我变得更加内向，不想与任何人打交道。	失去家庭的爱和安全感是很困扰，也会对个人的心理健康产生严重影响。以下是一些方法可以帮助你处理这种情况：1. 寻找支持：寻找一些支持你的人，可以是朋友、同事、心理咨询师等，他们可以帮助你分担你的情感和压力。2. 学会自我关怀：学会尝试关注自己的需要和情感，包括尝试寻找一些自己喜欢的事情来分散注意力。3. 自我认知：学会寻找自己的情感和需要，并学会表达它们。4. 寻求治疗：如果你发现自己无法控制自己的情绪和行为，可以考虑寻求心理治疗师的帮助。最重要的是，不要责怪自己，因为你无法改变过去。相信你有能力面对困难，并在适当的时候寻求帮助。
我很担心自己的未来，不知道自己是否能够成功，是否能够实现自己的梦想	我理解你的担忧。不过，你需要意识到，每个人的成功框架和追求都是不同的。成功并不是一个固定的概念，它取决于你个人的价值观、目标和追求。以下是一些建议，可以帮助你更好地认识自己，实现自己的梦想：1. 明确自己的价值观和目标：想想自己最感兴趣的事情，并尝试找到与之相关的职业或行业。同时，也要明确自己的价值观和目标，这样才能更好地规划自己的未来。2. 学习新技能：投入学习新的技能和知识，帮助你在职业生涯中不断成长和发展。这样，你也能更好地了解自己的能力和潜力。3. 坚持努力工作：努力工作并不总是能够带来总是完美的结果，但是它可以让你更好地认识自己，并让你在未来的职业生涯中不断成长和发展。4. 接受挑战和失败：不要怕失败和挑战，因为它们可以让你更好地了解自己的弱点和不足，并让你在未来的职业生涯中更好地成长和发展。5. ��
我感到自己无法应对生活中的压力和挑战，经常出现情绪低落、焦虑和失眠等问题。	这很常见，生活中的压力和挑战是无法避免的。但是，你可以采取一些有效的方法来应对这些问题。首先，你可以尝试放松身心。尝试冥想、呼吸练习、瑜伽、按摩等方法来减轻紧张和焦虑。或者，你可以尝试观看一些轻松的电影或者听一些轻松的音乐来放松身心。其次，你可以尝试改变自己的生活方式。例如，建立健康的作息规律、增加运动量、减少油腻食品的摄入、减少压力事物的塞子等方法。这些方法可以帮助你保持身体健康，同时也能够减轻紧张和焦虑。最后，如果你发现自己无法应对生活中的压力和挑战，建议寻求专业帮助。专业心理咨询师可以为你提供专业的咨询和治疗，帮助你探索问题的根本原因，并提供有效的解决方案。
我感觉自己很孤独，虽然身边有很多人，但总觉得无法与他们真正连接，这是不是人际关系障碍？	当人们感觉很孤独时，可能会让他们感到很不舒服和不安。感觉无法与身边的人真正连接，确实可能是人际关系障碍的一个表现。这种情况下，你可以尝试以下方法来改善自己的情况：1. 尝试加入一些社交活动或者社交团体，以拓展自己的社交圈。你可以尝试参加一些兴趣爱好小组或者志愿者活动来结识更多的人。2. 尝试学习沟通技巧，以便更好地表达自己的想法和感受。你可以寻找一些沟通技巧的书籍或者参加一些沟通技巧的课程来提高自己的沟通能力。3. 尝试寻找一些共同的兴趣爱好，以便更好地聚合身边的人。你可以寻找一些与自己兴趣爱好相关的社群或者社交团体，以结识更多的人。4. 尝试寻求专业帮助。如果你发现自己无法克服孤独感，可以寻求专业的心理咨询师的帮助。他们可以帮助你探索和理解自己的情感和行为，并提供有效的干预和治��
我对未来感到非常不安，不知道自己该做什么，也不知道未来会怎样	对未来感到不安是很正常的，特别是当你感到不知道自己应该做什么时。以下是一些可以帮助你应对这种情况的建议：1. 坚持自我反思。尝试思考自己的兴趣爱好、价值观和长期目标，并尝试找到与自己相符合的方向。这可以帮助你更好地明确自己的未来目标，并找到更有意义和充实的人生方向。2. 设定小目标。将大的目标分解成小的、可验证的目标，并制定实现这些目标所需的计划。这可以帮助你更容易地实现自己的目标，并建立自信和成就感。3. 寻找资源和支持。寻找可以提供建议和支持的人，如导师、朋友、家人或者专业的心理咨询师。他们可以帮助你找到更好的方向，并提供答案和支持。4. 尝试新的经历。尝试新的经历可以帮助你扩展自己的视野和能力，并帮助你更好地了解自己的兴趣和优势。这可以帮助你更容易地走向更有意义和充实的人生道路。5. 保持积极的心态。尝试保持积极的
我的婚姻关系出现了很多问题，我感到沮丧和无助，不知道该如何处理	婚姻关系出现问题时，可能会让人感到沮丧和无助。您可以尝试以下几个步骤来处理这些问题：1. 冷静下来：在处理问题时，首先要冷静下来。尝试不要感到情绪化，这样可以让您更清晰地看待问题。2. 沟通：与您的伴侣进行坦诚的沟通，表达您的感受和需求。尝试避免指责或责怪对方，而是尝试理解对方的观点和感受。3. 寻求支持：如果您觉得无法解决问题自己，可以寻求外部支持，例如咨询律师、心理咨询师或其他专业人士。他们可以为您提供专业意见和建议。4. 制定计划：在解决问题的过程中，制定一个明确的计划。明确可行的解决方案，并与您的伴侣一起制定实现这些解决方案的计划。5. 寻求帮助：如果问题是无法解决的，您可以考虑寻求帮助，例如寻求分婚或寻求离婚法律帮助。请记住，处理婚姻问题需
我经常会感到很疲惫，身体和精神都很虚弱，甚至有时候会出现自杀的念头，感觉自己的生命没有意义	这些感受可能是正常的情绪反应，但它们在长时间继续存在可能会给你的生活带来负面影响。如果你感到这些情绪持续时间过长或者越来越频繁，建议你寻求专业帮助。以下是一些建议，帮助你改善这些情绪：1. 寻求支持：与家人、朋友或者专业人士（如心理医生）交流你的感受，他们可以为你提供支持和建议。2. 保持健康的生活方式：保持健康的饮食、睡眠和运动习惯，有助于提高身体健康和情绪状态。3. 增强社交支持：参加社交活动，与朋友、同事或志愿者组织交流，增加社交支持，有助于提高情绪。4. 学会放松：学会减轻压力，学会放松技巧，如冥想、深呼吸、瑜伽等，可以帮助你缓解压力和焦虑。5. 考虑寻求专业帮助：如果你的情绪问题持续存在并且影响到你的日常生活，建议寻求专业帮助，如心理治疗或药物治疗。请记住，每个人的情况都不同，所以建议寻
我有时候会突然出现极度恐惧和惊恐的感觉，很难控制自己的情绪和行为，这种状态持续的时间也很长。	这种情况可能是恐惧症（Anxiety disorder）的症状之一。恐惧症是一种常见的精神疾病，可以在不同年龄、性别、种族和文化背景下发病。恐惧症通常表现为持续的恐惧、害怕、焦虑和紧张，这些情绪可能会影响到你的日常生活和工作。以下是一些建议，帮助你应对恐惧症：1. 寻求专业帮助：与心理医生、治疗师或专业护士交流，寻求专业的治疗和支持。2. 制定管理自己的计划：让自己制定一个计划，包括日常生活、工作、饮食、睡眠等方面的要点，以帮助你更好地管理自己的情绪和行为。3. 学会放松和冥想：学会减轻压力，学会放松技巧，如冥想、深呼吸、瑜伽等，可以帮助你缓解压力和焦虑。4. 增强社交支持：参加社交活动，与朋友、同事或志愿者组织交流，增加社交支持，有助于提高情绪。5. 药物治疗：如果你的恐惧症情况很��
每当我面临一个新的挑战，就会感到非常紧张和不安，让我觉得自己无法应对	面对新的挑战时，紧张和不安是很常见的情绪。以下是一些应对这种情绪的建议：1. 接受挑战：挑战是成长的机会，而不是负担。尝试接受挑战，并将其视为一种机会去学习和成长。2. 制定计划：在面对挑战时，制定一个明确的计划，以便更好地应对它。这个计划应该包括可行的目标和实现这些目标的步骤。3. 寻求支持：与朋友、家人或导师交流，向他们寻求支持和建议。他们可能会提供意见，帮助您看到问题的不同角度。4. 学习：时刻学习新知识和技能，以便更好地应对新的挑战。学习可以帮助您拓展视野，并提高自己的综合能力。5. 记录进展：记录您的进展可以让您更好地了解自己的成长，并激励您继续前进。记录自己的成功和遇到的挑战，以及您如何应对这些挑战。最重要的是，不要把挑战看作是终点，而是看作是一个新的起点。相信您有能力应对挑战，并��
我有时候会突然觉得自己不再有任何兴趣爱好，对什么都提不起兴趣，感觉自己失去了方向和动力	失去兴趣爱好是一种很常见的问题。以下是一些应对这种情绪的建议：1. 追求兴趣爱好：尝试重新发掘您的兴趣爱好，并尝试寻找新的兴趣爱好。您可以尝试新的活动、读新书、尝试新的食物等等。2. 学习新技能：学习新技能可以帮助您找到新的兴趣爱好。您可以尝试学习一门新的课程、尝试一项新的爱好等等。3. 寻找支持：与朋友、家人或导师交流，向他们寻求支持和建议。他们可能会提供意见，帮助您找到新的兴趣爱好。4. 放松身心：放松身心可以帮助您重新找到自己的兴趣爱好。尝试冥想、瑜伽、阅读等等。5. 找到目标：设定一个目标可以帮助您重新找到方向和动力。设定一个可行的目标，并制定计划来实现这个目标。最重要的是，不要把失去兴趣爱好视为一种毁灭性的问题，而是看作是一个新的起点。相信您有能力找到新的兴趣爱好，并重新找到方向和动
偶尔会有一种无法抑制的情绪涌上心头，我想自己有抑郁症该怎么办	如果你怀疑自己可能有抑郁症，首先需要咨询医生的意见。医生可以进行全面的检查和评估，以确定是否存在抑郁症的症状。在等待医生的评估期间，你可以尝试一些自我干预的方法来缓解情绪，例如：1. 保持规律的作息时间和饮食习惯，以帮助调整情绪。2. 保持身体锻炼，例如散步、瑜伽、游泳等，有助于减轻身体的压力，并增强身体的抵抗力。3. 寻找一些让自己愉悦的活动，例如看电影、听音乐、与朋友聊天等。4. 学会缓解压力，例如通过冥想、深呼吸等方式来减轻紧张和焦虑。5. 寻求支持，与家人、朋友或心理治疗师等建立联系，分享自己的感受和困惑，获得支持和建议。最后，如果你觉得自己的情绪问题已经影响到了日常生活，或者自己的生活和安全受到了威胁，请及时寻求专业帮助。专
我一直觉得自己的身体很不舒服，有各种奇怪的症状，但医生都说我身体很健康，让我感到很焦虑和无助。	如果你觉得自己的身体很不舒服，并且医生总是说你身体健康，那么你可能感到很焦虑和无助。这种情况下，可以尝试以下几个方法：1. 寻找其他医疗专业人士的意见：如果你觉得自己的身体症状很糟糕，或者你不信任医生的诊断，可以考虑寻找其他专业人士，例如皮肤科医生、内科医生、心理治疗师等，获得更多的意见和建议。2. 寻找自己的健康问题的原因：有时候，身体症状可能是由于一些健康问题引起的，例如饮食不当、睡眠不足、压力过大等。尝试探索这些因素，并尝试改善自己的生活习惯，以帮助改善身体症状。3. 寻求支持：如果你感到焦虑和无助，可以寻求支持，与家人、朋友或心理治疗师等建立联系，分享自己的感受和困惑，获得支持和建议。4. 寻求医疗帮助：如果你的身体症状严重影响到了你的日常生活，或者你担心自己的健康，请�
由于长期处在紧张的环境下，黄小明经常失眠，早上晚上不分，完全失去节奏	失眠是一种常见的心理问题，可能会对日常生活产生负面影响。如果你担心自己的失眠问题，可以尝试以下几种方法来管理和改善：1. 保持规律的作息时间和饮水量：保持规律的作息时间和饮水量有助于调整身体的时间和睡眠，从而帮助改善失眠问题。2. 适当的锻炼：适当的锻炼可以帮助减轻压力和紧张情绪，从而帮助改善失眠问题。3. 减少咖啡因和酒精的摄入：咖啡因和酒精的摄入可能会增加失眠的风险，因此你可以尽量减少这些物质的摄入。4. 保持良好的心态：摆脱抑郁情绪、焦虑和紧张状态，保持良好的心态可以帮助改善失眠问题。5. 寻求专业帮助：如果你的失眠问题严重影响到了你的日常生活，或者你担心自己的健康，请及时寻求专业帮助，获得更好的治疗和管理方法。
我和朋友之间的关系一直不太好，我觉得自己很难交到真正的朋友，这让我感到很孤单	很多人都有这样的经历，相信你也不是唯一一个。关系疲劳、交际困难等问题在成年人的生活中是非常普遍的，尤其是当你进入大学、职场等新的环境时，可能会面临更多的挑战和压力。如果你感到很孤单，可以尝试以下方法：1. 寻求支持：和家人、朋友、老师等人交流，寻求他们的支持和建议，比如你可以和你的朋友一起去看电影、体验新的事物，这些经历可以帮助你和他们建立更深层次的关系。2. 拓展社交圈子：加入志愿组织、社团、聚会等社交活动，这样可以让你结识更多的新朋友，也有机会扩大自己的社交圈子。3. 学习社交技巧：如果你觉得自己不太擅长交际，可以学习一些社交技巧，比如如何听取他人的意见、如何表达自己的意见等，这些技巧可以帮助你建立更好的交际关系。4. 接受自己：最重要的是，要接受自己，不要责怪自己的社交能力。每个人都有自己的特点和优势，要相信自己，不要过
身边的人总是觉得我太过紧张，总是在小事情上瞎操心，我该如何放松自己？	紧张和过度担忧是常见的情绪问题，需要采取一些方法来减轻。以下是一些可能有帮助的建议：1. 冥想和深呼吸：冥想和深呼吸可以帮助你放松身心，减轻紧张和焦虑情绪。你可以在工作或学习之余，几分钟进行冥想和深呼吸，这样可以帮助你放松身心，降低紧张和焦虑情绪。2. 运动：运动可以帮助你释放紧张和压力，同时也有助于提高情绪和心理健康。你可以选择你喜欢的运动方式，例如瑜伽、慢跑、游泳等。3. 自我反思：紧张和担忧可能是因为你对自己过于苛刻，或者有些事情让你感到无助。你可以通过自我反思来发现自己的问题和需要改进的地方，这样可以帮助你更好地管理自己的情绪和行为。4. 找到支持：紧张和担忧可能会让你感到孤独和无助。你可以寻找身边的人，例如朋友、家人或心理咨询师，向他们寻求支持和建议。最重要的是，要学会接受
我的失眠使我不得不每晚都去看精神科医生	失眠可能会对你的生活和工作产生负面影响，因此寻求专业医生的建议和治疗是很重要的。如果你已经考虑过看精神科医生，那么你应该找到一位具有专业知识和经验的医生，并向他们寻求帮助。在与精神科医生交流时，你可以提及你的失眠患症，他们会根据你的情况继续进行评估和诊断，并制定适合你的治疗方案。早期进行治疗可以有助于减轻症状，并减少长期的健康风险。同时，请注意保持良好的作息和生活习惯，避免过度疲劳和焦虑，保持良好的饮食和运动习惯，这些都有助于改善失眠和提高身体健康水平。如果你感到情绪极度低落或受到其他心理压力，也可以在需要的时候寻求专业心理健康服务。
我觉得自己没有能力面对家庭和社会的压力，很多事都没办法完成	我可以理解你的感受。面对家庭和社会的压力确实是很难的。以下是一些可能有帮助的建议：1. 逐步分解问题：很多时候，我们会把一个大的问题把成一个整体，而忽略了每个步骤的处理方法。你可以尝试将问题分解成更小的部分，逐步处理每个部分。逐步完成每个部分的任务，会让你感到更有成就感和自信心。2. 寻求支持：家人、朋友和心理咨询师都可以提供支持和帮助，你可以与他们分享你的感受和困惑，并寻求他们的建议和支持。他们可以为你提供鼓励和支持，帮助你更好地应对压力。3. 适当放松：放松是应对压力的重要方法之一。你可以尝试冥想、瑜伽、游泳、弹奏乐器等方式来减轻压力，放松身心，提高自信和心理健康。4. 找到自己的支持和庇护：有时候，我们会感到无助和孤独，需要找到自己的支持和庇护。你可以寻找自己感兴趣的活动，比如旅游、阅��
我觉得自己的人际关系越来越糟糕，无论是家人还是朋友，都不再信任我或者支持我，这让我感到很失落和绝望。	很抱歉听到你的感受。关系疲劳和人际关系问题是一个复杂的话题，有时候我们会遇到人际关系的挫折，但是这并不代表你没有价值或者没有得到支持。以下是一些建议，希望能够帮助你：1. 寻找支持：尝试和家人、朋友或者专业人士（如心理医生、咨询师等）交流你的感受和困扰，他们可以给你提供支持和建议，让你感到更舒适和理解。2. 认识自己：了解自己的价值观和需要，不要责怪自己的不足，而是努力改进和成长。3. 学会表达：学会有效沟通，表达自己的想法和感受，让别人更好地理解你。4. 寻找共同点：尝试寻找与他人的共同点，并倾听他们的想法和经验，建立更为广泛的联系。5. 接受不同的观点：接受不同的观点和意见，不要一味地追求你的想法或者标准，而是尊重他人的选择。6. 规划未来：规划你的未来，制定可行的目标和计划，并寻找支持
我常常感到无法控制自己的情绪和行为，经常会做出冲动或暴力的举动。	这是一种非常正常的情绪反应，但是如果这种情绪反应让你不断地影响到你的日常生活和人际关系，那么你可能需要尝试一些其他的方法来处理这种情绪。首先，你可以尝试通过深呼吸或其他放松技巧来减轻情绪压力。当你感到情绪无法控制时，做些什么来帮助自己平静下来，这样可以让你更清晰地看待问题，更有效地解决问题。其次，你可以尝试寻求专业帮助，例如与心理医生或心理治疗师谈谈你的情绪问题。他们可以帮助你理解你的情绪和行为，并提供一些有效的方法来应对这些情绪和行为。最后，你可以尝试改变你的生活方式，例如增加锻炼、减少压力和挑战、建立健康的社交网络等等。这些改变可以帮助你更好地控制自己的情绪和行为，并提高你的心理健康水平。总之，如果你感到无法控制自己的情绪和行为，那么你应该尝试寻求专业帮助，并尝试改变你的生活方式。这些方法可以帮助你更好地控制自己的情绪和行为，并提高你的心理
我经常害怕被别人拒绝，所以我很少把自己的想法说出来	这可能是一种自我保护的行为，害怕被别人拒绝可以避免被别人拒绝或被忽视。但是，这也可能会让你感到孤独、不被理解和不被支持。你可以尝试逐渐地适应自己的想法和感受，并逐渐地学会表达自己的需求和想法。你可以试着寻找一些支持和理解的人，与他们分享你的感受和想法。你可以尝试和他们建立良好的沟通和合作关系，以便更好地表达自己的需求和想法。另外，你也可以尝试一些技巧来帮助你更好地表达自己，例如深呼吸、放松自己的身体和心情、使用简单明了的语言等等。这些技巧可以帮助你更好地表达自己，并提高你的自信心和自我表达能力。最后，你可以尝试逐渐地承担一些风险，与别人分享你的想法和感受。你可以尝试在自己的眼球内，逐渐地建立自信和自我认同感。总之，你可以尝试逐渐地适应自己的想法和感受，并逐渐地学会表达自己的需求和想法。你可
在青少年时期抑郁症开始了慢慢发展	抑郁症是一种常见的心理障碍，它会影响一个人的情绪、思维和行为。研究表明，抑郁症的症状可能在青少年时期开始慢慢发展。在青少年时期，一些因素可能会导致抑郁症的症状的出现，例如学业压力、社交压力、家庭问题、生理变化等等。这些因素可能会影响一个人的情绪和心理健康，导致出现抑郁症症状。如果你怀疑自己可能患有抑郁症，建议你尽快寻求专业帮助。专业人士可以帮助你诊断和治疗抑郁症，并提供一些有效的方法来应对这种症状。总之，如果你怀疑自己可能患有抑郁症，建议你尽快寻求专业帮助。专业人士可以帮助你诊断和治疗抑郁症，并提供一些有效的方法来应对这种症状。
我对自己的外貌和身体感到不满意，觉得自己不够完美，经常感到焦虑和不安	很抱歉听到你的感受。外貌和身体是每个人都会遇到的问题，尤其是在现代社会中，我们常常会面临各种各样的社交压力和负面影响。以下是一些建议，希望能帮助你：1. 认识自己：了解自己的价值观和需要，不要责怪自己的不足，而是努力改进和成长。2. 接受自己：尝试接受自己的外貌和身体，不要责怪自己的不完美之处，这也可以帮助你避免过度的自我贬低。3. 学会宽容：学会宽容地看待自己和他人，不要过于挑剔自己的缺点，也不要过于看重他人的外貌和身体。4. 寻找兴趣：尝试寻找自己的兴趣和爱好，可以让你专注于自己的成长和发展，把注意力转移到自己的内在价值上。5. 保持身体健康：保持健康的生活方式，如健康饮食、适度的运动和充足的睡眠，有助于改善身体和心理健康。6. 寻求支持：寻找专业的心理咨询师或者医生，了解如何应对自己的情绪
我总是担心自己做的事情不够好，即使别人已经称赞过我，也不能放下心中的担忧	这是很常见的情况。有时候我们可能会对自己的表现过于苛刻，而且我们可能会比较自我评价，认为自己还没有做到很好。这种情况下，有几个方法可以帮助你放下心中的担忧：1. 接受自己的不足：接受自己的不足是认识到自己的第一步。当你能够接受自己的不足，你就能更好地面对自己的不足，并且找到改进的方法。2. 认识到自己的优点：当你能够认识到自己的优点，你就能更好地发挥自己的优势，做出更好的表现。3. 放下过去：放下过去，停止比较过去的表现和现在的表现。每个人都会有不足之处，而且每个人都会有不同的发展速度。4. 寻求反馈：寻求反馈可以帮助你更好地了解自己的表现，并且你可以从反馈中学到很多东西。但是需要注意的是，反馈并不是绝对的真相，需要我们理性看待。5. 学会放松：学会放松可以帮助你逐渐克服心理压力，放下自己的担忧。可以通过练习冥想、深呼�
我发现自己越来越难以集中注意力，无论是看书还是做事情，都会容易分心	这是很常见的问题，现在人们的生活节奏越来越快，而且很多人需要同时处理多个任务，这可能会导致注意力不集中的问题。以下是一些可以帮助你集中注意力的方法：1. 管理时间：制定一个计划，合理安排时间，清晰地认识到每个任务的优先级和时间限制，这样可以帮助你更好地管理时间，避免分心。2. 减少干扰：减少干扰来源，比如关闭手机、电视、社交媒体等，可以让你专注于当前的任务。3. 练习注意力培训：例如冥想、瑜伽、深呼吸等，这些活动可以帮助你提高注意力，并且让你更好地集中精力。4. 保持健康：保持健康的生活方式可以让你更好地集中注意力。充足的睡眠、健康饮食、适当的运动等，都可以帮助你保持注意力。5. 沟通：与他人沟通可以帮助你分享思想和情感，也可以让你更加专注于当前的任务。记住，集中注意力需要一定的时间和练习，但是即使你不能立即集中注意力，也不要灰心。每一步都是成长的机会，不
我总觉得自己没有任何价值，不知道自己存在的意义是什么，每天都感到很空虚和无助。	这是一种非常负面的情绪，可能会导致很多问题。以下是一些可能有帮助的建议：1. 尝试寻求专业帮助：如果你感到非常困扰，可以考虑寻求专业帮助。心理医生或者心理治疗师可以帮助你探索感到无助和空虚的原因，并提供相应的治疗。2. 增强自尊心：认识到自己的优点和价值。可以尝试写下自己的优点列表，或者邀请朋友或家人帮助你找到你的优点。3. 培养兴趣：培养兴趣可以让你感到更有成就感，并且可以让你更加有自信和自爱。4. 寻找社交支持：建立有意义的社交关系，与朋友、家人或志同道合的人交流，分享你的想法和感受。5. 做好自我管理：学会管理自己的情绪和情感，避免沉迷于不必要的思维和情感。记住，每个人都有价值和意义。不管你感到无助和空虚，也不要忘记你的优点和价值。同时，寻求帮助和支持也是很重要的，不要害��
我很害怕与人交往，害怕被拒绝、被嘲笑或被误解，我常常感到孤独和无助。	我理解你的感受。与人交往可能让我们感到不安、害怕被拒绝、被嘲笑或误解。这些情况可能会让我们感到孤独和无助。但是，我们可以通过学习和实践一些技巧来增强我们的社交能力，并减少这些不良情况的发生。以下是一些可能有帮助的建议：1. 开始练习交流：无论是面对亲友还是陌生人，练习交流可以帮助你学会表达自己的想法和感受。你可以在日常生活中练习，例如与亲友谈论你的兴趣爱好或者在工作中与同事交流。2. 增强自信：自信是建立良好社交关系的关键。你可以尝试自我提升，学习新技能或者参加社交活动，以增强自己的自信心。3. 学会倾听：倾听是建立良好社交关系的重要组成部分。当你与他人交流时，尽可能地倾听对方的意见和想法，而不是忽略他们的观点。4. 学会表达自己的需求：避免把自己的需求和感受放在了自己的心中里，而忽略了与他人的交流
我对自己的外貌和身材很不满意，觉得自己很丑陋，很不吸引人，经常想着去整容，去减肥，但又担心手术会有风险，害怕被别人嘲笑和不被接受。	首先，我想帮助你理解，每个人都有自己的独特之处，而且外貌并不是最重要的。你的内在特征和个性才是最重要的，而你已经拥有了这些特征，所以不要让外在的外貌影响你的自信和自尊心。同时，你也应该意识到，过度追求外貌并不是解决问题的方法。过度刺激的减肥方式可能会对身体造成损害，严重影响健康。而且，冷漠的减肥方式也不会让你真正满意自己。相反，你可以尝试通过积极向上的方式来提升自己的自信和自尊心，例如学习新技能、增加社交圈子、寻找兴趣爱好等等。这些都是可以让你感到更好的自尊心和更高的生活满意度的方式。如果你确实想要尝试整容手术，你也应该了解一些信息，例如手术的风险和收敛等等。在做出决定之前，你应该仔细考虑手术的风险和收敛，并寻求专业人士的意见和建议。最后，我想强调的是，你不应该被别人的评价和看法所影响。你应该相信自�
我经常为了工作熬夜加班，导致自己的身体状况越来越差，但是我无法停下来，因为我觉得只有这样才能证明自己的价值和能力	我理解你的感受，工作责任感是很正常的，但是过度疲劳和不良的作息习惯可能会对身体和工作效率造成负面影响。首先，我建议你寻找能够帮助你平衡工作和生活的方法。你可以考虑制定一个合理的作息计划，尽量保证每天的睡眠和休息充足。此外，你可以尝试添加休息的时间，例如每天适时休息、进行锻炼和放松练习等等，这些都有助于提高工作效率和缓解疲劳感。其次，你可以重新审视你的工作目标和时间表，看看是否能够让一些任务分解成更小的部分，或者是在一天里分配更多的时间来完成这些任务。如果可能的话，你可以考虑将一些任务迁移到非工作时间，例如晚上或周末等等。最后，你可以寻求同事或者家人的帮助，也可以向专业人士咨询如何改善作息习惯。不要忘记，负面的工作习惯和身体状况可能会导致健康问题，所以请务必保持健康的生活方式，照顾自己的身体和心理健康。
我感到自己越来越沉迷于游戏和社交媒体，好像这些东西成了我生活中不可或缺的一部分，这种依赖让我感到无法自拔和失去了自我，我希望能够找到一种摆脱这种依赖的方法。	游戏和社交媒体可以是很有趣和有乐趣的事情，但如果发生过度依赖和影响到日常生活和工作，就可能会成为一种问题。我理解你的感受，但是要摆脱这种依赖并不是一件容易的事情，需要一定的努力和耐心。以下是一些可能有帮助的建议：1. 制定一个时间表，限制游戏和社交媒体的使用时间，并为这些时间设置一个目标，例如完成某个任务或者进行锻炼等等。2. 设置一个奖励机制，当你完成一些目标或者成功摆脱游戏和社交媒体的依赖时，给你自己一些小小的奖励，例如看一部电影、吃一顿美食、购买一件新的服装等等。3. 寻找更多的兴趣爱好，例如阅读、旅游、运动、学习新技能等等，这些都可以帮助你减轻压力，提高自尊心和增强自我认同感。4. 寻求专业帮助，如心理咨询师或者治疗师等，他们可以帮助你找到更好的方法来摆脱游戏和社交媒体的依赖。最
我的心情总是起伏不定，有时候感到很开心，有时候又非常沮丧，甚至想要自杀，这让我感到非常困扰。	我理解你的感受。心情的波动可能会让我们感到非常困扰。但是，我们可以通过学习和实践一些技巧来管理我们的情绪和心情。以下是一些可能有帮助的建议：1. 认识到自己的情绪：学会认识到自己的情绪和心情，包括当前的情绪状态和它们的根源。了解自己的情绪可以帮助你更好地管理它们。2. 学会放松：放松是减轻压力和减轻情绪波动的关键。你可以尝试深呼吸、冥想、瑜伽、游泳、做瑜伽等方式来放松。3. 创造一个安全的环境：创造一个安全的环境可以帮助你缓解压力和情绪波动。例如，你可以在家中安装一个舒适的家具、使用柔和的颜色和香气等等。4. 寻求帮助：如果你觉得自己的情绪波动已经影响到了你的日常生活，你可以寻求专业的帮助。心理医生或心理治疗师可以帮助你管理你的情绪和辅助你改善心情。5. 坚持健康的生活方式：健康的生活方式可以帮助
有时候我会觉得没有人在乎我，只有我自己才是真正可以依赖的人	这种感觉是很正常的，每个人都会有时候觉得自己孤独。但是，我们必须记住，我们并没有真正的独自，我们都是与他人相互关联的生物。每个人都需要与他人建立积极的联系，这有助于我们的心理健康和幸福感。如果你觉得自己孤独，你可以尝试做一些来增加与他人的联系，比如参加社交活动、和朋友聊天、寻找志同道合的兴趣爱好者等等。同时，也可以尝试向专业人士寻求帮助，如心理咨询师或医生，他们可以帮助你找到解决问题的方法。
最近经常失眠，晚上总是躺在床上辗转反侧，这可能是潜在的心理问题吗	失眠可能与心理问题有关，但是并不一定是潜在的心理问题。失眠可能是由多种因素引起的，包括生活习惯、健康状况、压力、缺乏锻炼、药物使用等等。如果你感觉自己的失眠严重影响到日常生活，建议尽快就医，以便进行进一步的评估和诊断。在寻求医疗帮助的同时，也可以尝试一些自我调节和管理失眠的方法，比如保持良好的作息时间、减少睡前咖啡因含量较高的饮品、减少压力和焦虑等等。如果你感觉自己的失眠问题不能自行解决，也可以寻求心理咨询师或治疗师的帮助，他们可以帮助你探索和调节失眠的原因。
我和家人的关系一直不太好，我感觉他们不理解我，不尊重我，这让我感到很孤独	理解和尊重你是每个人都应该做的，但是如果你感觉家人却不理解你，这可能会让你感到很孤单和无助。这种情况下，你可以尝试和家人进行坦诚的沟通，表达你的感受和想法。你可以告诉他们你的需要和期望，并尝试和他们一起找到解决问题的方法。同时，你也可以寻求外部支持，如朋友、同事或心理咨询师等。他们可以为你提供陪伴和支持，帮助你度过这段困难的时期。如果你觉得自己无法解决这个问题，也可以考虑寻求专业人士的帮助，他们可以帮助你找到更好的解决方法。
我经常感到内心空虚和孤独，想要找些事情来填补这种空洞感，但是往往找不到适合的方式来缓解这种感受	寻找适合自己的方式来缓解孤独感和空虚感是很重要的。有些人可能会尝试寻求社交关系，有些人可能会寻找新的兴趣爱好，有些人可能会寻找工作或学习的机会等等。你可以试着一些不同的方式来找到适合自己的方式来缓解这种感受，比如：1. 找到自己感兴趣的事情，比如阅读、运动、绘画、音乐等等。2. 寻找新的社交互动方式，比如加入志愿者组织、参加社交活动、加入社交网络等等。3. 寻找新的兴趣爱好，比如学习新的技能、旅游、摄影、冲浪等等。4. 寻找专业人士的帮助，比如心理咨询师或治疗师，他们可以帮助你找到更好的方式来缓解这种感受。5. 寻找心灵成长的机会，比如参加各种培训课程、参加文化活动、旅行等等。最重要的是，不要急于寻找答案，要时刻保持耐心和热情，相信你会找到适合自己的方式来缓解这种�
