# Supplementary material
Source: ML conference proceedings conference paper supplement (https://openreview.net/forum?id=JL42j1BL5h)
Supplement: supplementary_material [file Mental_Health_v.xlsx]

## Sheet: Sheet1
Input	Output
मैं अक्सर अकेला और असहाय महसूस करता हूं। कोई मुझे समझ नहीं पा रहा है. मैं बिना किसी मूल्य या अर्थ के एक हारे हुए व्यक्ति की तरह भी महसूस करता हूं। यह भावना मुझे बहुत उदास और निराश कर देती है। मैं नहीं जानता कि इनसे कैसे छुटकारा पाया जाए।	माता-पिता, इन बातों से कुछ और सलाह करनी चाहिए। मन की भावनाओं और उनके कारणों से एक बार महसूस करने की सलाह मिल सकती है। यदि आप अपने विचारों और भावनाओं से पहले समझना चाहिए, तो कई बार उन बातों के बारे में बात करें। इससे पहले, आप अपने अनमोल और उनके परिवारजन के बारे में एक बार समझना चाहिए। इन बातों से आपको अपने बच्चने की समस्याओं के बारे में याद आएगी और आप उनकी होनी चाहिए।आपको समझना चाहिए कि आप अपने वि…
यहां तक ​​कि अगर मैं सिर्फ चिप्स का एक बैग खरीदने जा रहा हूं, तो मुझे चिंता है कि लोग सोचेंगे कि मैं बहुत अधिक खा रहा हूं, यह आत्म-पराजय वाला व्यवहार है।	मुझे यह कई चिंता नहीं है कि आप अपने स्वभाव और स्वास्थ्य के लिए महसूस कर रहे हैं। लगता है कि आप अपने मन की असर या आपकी दिन-नामा के लिए अनिवार्य होने की एक भूचक रह हो। इस समय मन की आशंकाओं और भावनाओं से संबंधित व्यवहार को कैसे निकाल सकता है इसलिए मैं आपकी समझिए माता-पिता बनने के लिए आपकी साझा नजर देनी चाहिए। खुशी होने की कल्पна की माता-पिता बनने से आपकी समझ में भर जाएगी।
मैं हमेशा थका हुआ और शक्तिहीन महसूस कर रहा था, अपने कार्यों पर ध्यान केंद्रित करने में असमर्थ था या उन चीजों पर भी काम नहीं कर पा रहा था जिनमें मेरी रुचि थी, जिससे मैं बहुत निराश हो गया था।	समर्थ था या उन चीजों पर भी काम नहीं कर पा रहा था जिनमें मेरी रुचि थी, जिससे मैं बहुत निराश हो गया था।
हाल ही में, मैं अच्छी तरह से सो नहीं पा रहा हूं, या जब मैं सोता हूं तो मुझे बुरे सपने आते हैं, और जब मैं उठता हूं तो मुझे बहुत थकान और थकान महसूस होती है।	समर्थ था या उन चीजों पर भी काम नहीं कर पा रहा था जिनमें मेरी रुचि थी, जिससे मैं बहुत निराश हो गया था।
हर बार जब मैं डॉक्टर के पास जाता हूं, तो कोई सुधार नहीं होता है, और मेरा मूड खराब हो जाता है, और मैं अक्सर आत्म-दया और आत्म-दया में पड़ जाता हूं	यदि आपको डॉक्टर से काफी सुंदर बात करने वाले सलाह पर आगे बढ़ती हूं, तो आपको बहुत खुशी होगी। बार-बार डॉक्टर से बात करने वाली सलाह पर आगे बढ़ती है। आपको इस तारीफ के लिए आपको सफलता हारना चाहिए।आपका मूड खराब होने की भूमिका भी है। मूड खराब होने की सलाह पर आपको सुनकर पूछने वाले ताकत के लिए आपको बहुत ही सुंदर होगी। आपको इस तरह का कोई आयाम नहीं होता है कि मूड खराब होने की सफलता के लिए आपको इस तरह को कोई स…
मैं हमेशा भीड़ में भी अलग-थलग और बहिष्कृत महसूस करता था।	मेरा शायरिक तौर पर आप सबको अपने बार-बार भीड़ में अलग-थलग और बहिष्कृत महसूस करने वाले अनुभव के बारे में विचार कर रहे हैं। यदि आप यह बात करने के लिए अपनी आदर शक करने के लिए सलाह पर आपको कुछ समझ पाऊँगा है तो मुझे कुछ सी आशा होगी। इस तरह को लोग अपने साथ हाथ हैं और अपनी आदर शक करने के लिए इस बात के लिए सलाह पर आपको कुछ समझ पाऊँगा है। यदि आपको कुछ सी सलाह के लिए इंसानी हो सकती है तो मैं आपके साथ सही तर…
अपने आप को खेलों का आदी होने दें, या इंटरनेट एक अदृश्य मनोवैज्ञानिक दबाव है	मेरा शायरिक तौर पर आप सबको अपने आप को खेलों का आदी होने देने वाले अदृश्य मनोवैज्ञानिक दबाव के बारे में विचार कर रहे हैं। मैं आपको इंटरनेट से पीड़ित नहीं कर रही हूं, इसलिए मैंने आपके मन से नहीं परिवर्तित कर पाया। मैं आपको सही सलाह पर देने से पहले मुझे आपकी सलाह करने की सहायता होगी। मेरे अनुभव के लिए आपको सलाह पर धन्यवाद।
मैं हाल ही में बहुत अधिक दबाव में रहा हूँ, मैं हर दिन बहुत चिंतित महसूस करता हूँ, मुझे अच्छी नींद नहीं आती है, मुझे सिरदर्द है, मेरा दिल तेजी से धड़कता है, और मुझे लगता है कि मैं किसी भी समय गिरने वाला हूँ	मैं सभी के लिए शानदा है कि आप ये बातों को कह रहे हैं। मुझे यह समाधान नहीं है कि आप इतनी दु
हर बार जब मैं कठिनाइयों और असफलताओं का सामना करता हूँ, तो मैं हमेशा आत्मविश्वास और प्रेरणा खो देता हूँ और महसूस करता हूँ कि मैं इसे संभाल नहीं सकता	यह एक साफ प्रकार के हक है, जो मन के दाईपियों और आत्मविश्वास से भर जाता है। मन में आत्मविश्वास सबसे पहले ही होता है और वह मन के साथ आधारित है। आत्मविश्वास को खो देने से मन को चंद करने लगाता है और इसे संभालने के लिए काम करने लगाता है। इसलिए, आपको स्वायत्व में सही आदत सीखने और आत्मविश्वास करने के लिए कुछ सामग्री के बारे में बताने के लिए आपका समय है।सही आदत सीखने के लिए आपको कुछ सामग्री है:1. आपके आत…
मुझे हमेशा चिंता रहती है कि मैं जो कर रहा हूं वह अच्छा नहीं है और मुझे ऐसा लगता है कि दूसरे लोग लगातार मेरा मूल्यांकन कर रहे हैं और यह निराशाजनक है।	It's natural to feel concerned when you feel like others are constantly judging you or criticizing your work. It's important to remember that people's opinions are just that - opinions. They may not always be accurate or fair, and they do not define your worth. It's important to have self-awareness and to understand that everyone has their own perspective and experiences. It's also important to h…
मैं हमेशा इस बारे में चिंतित रहता था कि क्या मैं सब कुछ ठीक कर रहा हूं, और इस बात से डरता था कि दूसरे लोग मेरे बारे में क्या सोचेंगे या मेरी आलोचना करेंगे, और इसके परिणामस्वरूप मैं अक्सर दर्दनाक आत्म-संदेह में डूब जाता था।	It's natural to feel concerned about how others perceive you and how they might judge you. However, it's important to remember that you can't control how others think or act. The only thing you can control is how you respond to these situations. It may be helpful to focus on building self-confidence and self-esteem, which can help you feel more secure in your own skin and less concerned about wha…
मैं अपने विचारों को अपने दिल में रखता हूं, मुझे हमेशा लगता है कि मैं फट जाऊंगा, और मैं दूसरों की नजरों से नहीं छिप सकता	मैं दूसरों की नजरों से नहीं छिप सकता
मेरे परिवार को अचानक एक दुर्घटना का सामना करना पड़ा, मेरे माता-पिता दोनों गंभीर रूप से घायल हो गए, जिससे मैं असहाय और उदास महसूस करने लगा, और यहाँ तक कि डिप्रेशन के लक्षण भी विकसित हो गए।	मराठी में हमारे पास साझा कहानी नहीं है, फिर से अगर आप हिंदी में चर्चा करना चाहेंगे तो कहाँ नामक किताब पढ़ सकतेंगे?
मैंने खुद को लोगों के साथ कम आराम दे पाया, हमेशा अकेले रहना पसंद करता था, सामाजिकता या दूसरों के साथ अपने जिंदगी को साझा करने में कोई दिलचस्पी नहीं थी, इस अकेलेपन ने मुझे बहुत उदास महसूस कराया	It sounds like you have been struggling with feelings of loneliness and isolation. It's understandable to feel this way, especially if you have had a difficult experience such as losing your parents at a young age. It's important to remember that it's okay to feel this way and to seek support from others.One thing you can try is finding ways to connect with others, such as joining a club or group…
मुझे नियंत्रित करने की तीव्र इच्छा है और मैं हमेशा अपने हाथों में सब कुछ नियंत्रित करना चाहता हूं, और दूसरों को हस्तक्षेप या दखल देने की अनुमति नहीं देता, जिससे पारस्परिक संबंध टूट जाते हैं	It sounds like you have a desire for independence and self-sufficiency, which is a common desire for many people. It's important to remember that it's okay to want to take care of yourself and to take the time you need to do things on your own.One thing you can try is setting small goals for yourself, such as doing something you enjoy or taking care of a specific task. This can help you build you…
मुझे अक्सर लगता है कि मेरा दिमाग बहुत अराजक है, जैसे कि एक ही समय में मेरे दिमाग में बहुत सारे विचार और आवाजें चल रही हों, जिससे मैं बहुत भ्रमित और खोया हुआ महसूस कर रहा हूं	It sounds like you are experiencing a lot of internal chatter and noise in your mind. This can be a common experience for many people, and it's important to recognize that it's okay to have thoughts and feelings.One thing you can try is practicing mindfulness techniques such as meditation or deep breathing exercises. These can help you become more aware of your thoughts and feelings, and can help…
मैं जो कुछ भी करता हूं उसके लिए मेरे परिवार द्वारा मेरी आलोचना क्यों की जाती है	मेरा आपराग्नभात है कि आप को परिवार के संबंध पर आलोचना करने के बाद आपको कैसे कहा जा सकता है। मेरी मायकों से परिवार के संबंध में आपकी बात बहुत मुश्किल होती है। यदि आप परिवार के संबंध पर कुछ करना चाहते हैं तो आप मुझे कुछ पता नहीं देते हुए अपने परिवार के संबंध की बात कर सकते हैं।
हाल ही में, मैं हमेशा थका हुआ महसूस करता हूं और हर दिन कोई ऊर्जा नहीं होती, यहां तक कि लंबे समय तक सोने के बाद भी यह बेहतर नहीं होता	It sounds like you are experiencing a lot of fatigue and lack of motivation lately. It's important to remember that these feelings are common and can be caused by a variety of factors. It's possible that you may be experiencing a mental health issue, such as depression or anxiety, which can affect your energy levels and motivation.It's important to take care of your mental health and well-being. …
मुझे ऐसा लगता है कि मैंने सारी प्रेरणा और आशा खो दी है और जीवन निरर्थक लगता है	It's understandable that you may be feeling overwhelmed and disheartened about your life. It's important to remember that it's normal to experience ups and downs, and it's okay to feel discouraged at times. However, it's important to take steps to address these feelings and improve your well-being.One approach you might consider is seeking support from a mental health professional, such as a ther…
मैं कभी-कभी बहुत घबराया हुआ महसूस करता हूं, और कभी-कभी मैं नीचे भी महसूस करता हूं, लेकिन मुझे नहीं पता कि मैं अपना मूड कैसे बदलूं	It's understandable that you may be feeling overwhelmed and unsure of how to make positive changes in your life. It's important to remember that change takes time and effort, and it's okay to take things one step at a time.One approach you might consider is setting small, achievable goals for yourself. For example, you might set a goal to exercise for 10 minutes a day, or to eat a healthy meal on…
मुझे अपनी सोच और धारणा के साथ समस्या है, और मुझे अक्सर अजीब आवाजें सुनाई देती हैं या अजीब चीजें दिखाई देती हैं, जिससे मुझे बहुत डर लगता है	मैं अपनी सोच, धारणा, समस्या और डरों के बारे में समझने के लिए आवाज देते हुए समस्या के बारे में कुछ आपस में प्रकाश डाल रहा हूँ।मुझे मन की संतुष्टि और आत्मविश्वास होने के लिए बहुत आह्वान करना चाहिए। मेरी सोच और धारणा से आपकी समस्या के बारे में बात कर सकती है, फिर सकते हैं कि मैं अपने निवेदन या अनुभव के लिए आपकी सहायता और समर्थन दे सकती हूँ।समस्या होने के बारे में, मैं अपनी सोच और धारणा से पहले समय आ…
मैं अक्सर तनावग्रस्त और चिंतित महसूस करता हूं, अपनी भावनाओं और तनाव को नियंत्रित करने में असमर्थ होता हूं, जिससे मुझे बहुत बेचैनी और बेचैनी महसूस होती है।	मैं सहायता करने के लिए आपकी स्थिति को समझना चाहूँ। मुझे कुछ समझ नहीं आया है कि आपकी भावनाओं और तनाव का नियंत्रण कैसे सुझाव देना चाहिए। आप अपनी साझा धारणाओं से मुझे बात कर सकती है और उनका समय कब करना चाहिए? मैं अपनी समझौते और आपकी समझने के लिए समय कर सकती हूँ।
मैं अक्सर अकेला और असहाय महसूस करता हूं, और जब मेरे आसपास कोई होता है तब भी मैं खाली महसूस करता हूं। मुझे नहीं पता कि ऐसा क्यों हो रहा है, मैं कैसे मदद मांग सकता हूं?	मैं सहायता करने के लिए आपकी स्थिति को समझना चाहूँ। मुझे कुछ समझ नहीं आया है कि आपकी समझने के लिए आपका कैसे है और क्या करना चाहिए। मैं आपकी साझा धारणाओं से मुझे बात कर सकती हूँ, और उनका समय कब करना चाहिए? मैं अपनी समझौते और आपकी समझने के लिए समय कर सकती हूँ।
मुझे अतीत में सदमा पहुँचा है, और अब मैं हमेशा उस अनुभव को भय और दर्द के साथ याद करता हूँ, और मुझे इस भावना पर काबू पाने के लिए मदद लेने की ज़रूरत है।	कुछ बार धन्यवाद, जो मुझे पता है कि आप अगर सदमा में पहुँच जा रहे हैं, तो क्या कितना देर चाहिए? क्या आप विसम्ध कुछ शेयर करना चाहिए और अगर हमारे बारे में कुछ चाहें तो क्या हैं?
मैं अतीत की यादों से छुटकारा नहीं पा रहा हूं, और जब भी मैं कुछ चीजों के बारे में सोचता हूं, तो मुझे बहुत दर्द होता है, और यह मेरे रोजमर्रा जिंदगी को भी प्रभावित करता है	मैं आपकी संघटना सुनती हूं। यह बहुत आकार और महत्वपूर्ण प्रकार के बारे में है। यदि आप कोई आपस में विशेष सहायता करनी चाहती हैं या आपको कुछ और जानकारी होनी चाहिए, तो आप मुझे कंप्यूटर या मोबाイल नंबर पर संख्या करके मिलें और मुझे संपर्क करना सुनिश्चित करें।
मुझे धमकाया जाता था और अब जब भी मैं इसके बारे में सोचता हूं तो मुझे डर लगता है और बुरे सपने भी आते हैं	I understand how you feel. It's normal to have fears and anxieties about past events or memories. However, it's important to remember that you are not responsible for what happened and you can't change the past. Instead, focus on the present moment and try to practice self-care and self-compassion. This can help you manage your emotions and reduce anxiety. If you are experiencing persistent distr…
मैं अधिक से अधिक अकेला महसूस करता हूं, कोई दोस्त नहीं, कोई रिश्तेदार नहीं, भले ही कोई आसपास हो, मैं बहुत खाली और असहज महसूस करता हूं	I'm sorry to hear that you're feeling alone and isolated. It can be difficult to reach out to others when we're feeling down, but it's important to remember that we're never truly alone. There are people who care about you and want to support you, whether it's a friend, family member, or a mental health professional.If you're feeling overwhelmed, it's important to take care of yourself. This may …
मुझे हमेशा ऐसा लगता है कि मैं ध्यान केंद्रित नहीं कर सकता, कार्यों को पूरा करना कठिन है, और मैं अक्सर थका हुआ और उदास रहता हूँ	It's important to remember that you are not alone in feeling this way. Many people struggle with attention and focus, and it can be challenging to balance work, responsibilities, and self-care. However, there are ways to manage these feelings and improve your well-being.One strategy is to prioritize self-care and incorporate activities that help you relax and recharge. This might include exercise…
मैं अक्सर अकेला और खोया हुआ महसूस करता हूँ, दूसरों के साथ घनिष्ठ संबंध स्थापित करने में असमर्थ रहता हूँ, यहाँ तक कि लोगों और अपने आस-पास की चीज़ों के लिए रुचि और उत्साह भी खो देता हूँ।	यह सही साझा करना चाहिए। आप अपने अंतर्दृष्टि और रोशनी को समझने में जुड़ने वाले समय के लिए अधिक प्रयत्न करना चाहिए। आपको बार-बार समझ में आया जाने वाले बातें करना चाहिए, और उनके बारे में आपकी राय या निश्चित प्रेरणा देना चाहिए। इन बातों से आपको अपने अंतर्दृष्टि को संपूर्ण समझने में मदद कर सकता है।हालांकि यदि आप अचानक अकेला रहने के बाद से अपनी रोचकी को खो देना चाहते हैं, तो आप अपने आपसा समय पेश कर के …
मैं अकेला और खोया हुआ महसूस करता हूँ और मुझे नहीं लगता कि मैं अन्य लोगों के साथ घनिष्ठ संबंध बना सकता हूँ, जो मुझे बहुत उदास और असहाय बनाता है	मुझे यह बात मंशा नहीं है कि आप अकेला रहने की बात है। यदि आप अकेला होने से इतने बार निवेदन नहीं रख सकते हैं तो यह समाधान नहीं होता है। इस समझ में, आप अपने अंतर्दृष्टि और रोशनी को समझने में आगे बढ़ने के लिए अनुभव करने में सहाय
मेरे आसपास हर कोई खुश है, लेकिन मैं अंदर से खालीपन महसूस करता हूं, किसी भी आनंद का आनंद लेने में असमर्थ हूं	मुझे यदि आप कोई आदरणीय बात करनी चाहिए तो कुछ और सामान्य बातें करनी चाहिए। यदि आप खालीपन के बावजूद अपनी रोशनी बनाने के लिए कोई आंखें खोलनी चाहिए तो किसी विशेष और समझ में आपको सफलता मिलेगी। अगर हर रोज़ आप खुश है तो कुछ आदरणीय बात है कि आप अपनी रोशनी को बदला सकते हैं। ऐसे में आप अपने अंतर्दृष्टि को स्थ
मेरा आत्म-सम्मान कम था और मैं अक्सर खुद को बेकार और महत्वहीन महसूस करता था, जिसके कारण मैं अपने सपनों और लक्ष्यों को हासिल करने से डरता था, असफलता से डरता था और दूसरों द्वारा तुच्छ समझे जाने से डरता था।	It sounds like you were struggling with low self-esteem and had a tendency to doubt yourself and your abilities. This can be a difficult thing to deal with, but it's great that you recognized it and are taking steps to address it. It's normal to have setbacks and failures, but it's important to remember that they don't define you as a person. Instead, focus on your strengths and accomplishments, …
मैं खुद को चीजों के प्रति अत्यधिक संवेदनशील पाता हूं और अक्सर छोटी-छोटी बातों को लेकर बेचैन और चिंतित महसूस करता हूं	यह अच्छा लगता है कि आप अपने संवेदनशील है और अपने आप को समझने से पहले स्वतंत्र राय मिल सकता है। यह सब कुछ भ्रम करता हुआ है कि आप एक युवा हो सकते हैं जो अपने मन के साथ स्वतंत्रता और सफलता साबित कर सकते हैं।आप अपने मन को सफलता से प्रभावित कर सकते हैं और इसमें सहायता कर सकते हैं। यदि आप अपने आपको सफलता से प्रभावित करने में सहायता करना चाहते हैं, तो आप सब कुछ कर सकते हैं। आप अपने अंतर्दृष्टि को समझना …
मेरे माता-पिता हमेशा मुझसे एक अच्छा इंसान बनने की बहुत उम्मीदें रखते थे, लेकिन मुझे ऐसा लगता था कि मैं उनके मानकों पर खरा नहीं उतरता, मैं चिंतित और कम आत्मसम्मान वाला था	यह ऐसा लगता है कि आप अपने माता-पिता के साथ एक अच्छा इंसान बनने की बहुत उम्मीदें रखते थे। मुझे याद आता है कि आप एक कम आत्मसम्मान वाला था और चिंतित थीं। लिखित रहते थे कि आप अपने मन को सफलता से प्रभावित करने में सहायता कर सकते हैं। एक सामान्य ताकत को अपने आप के लिए लेकर अपने माता-पिता के लिए उपयोगित करना चाहिए। माता-पिता आपको अपनी संभावनाओं और मन से संतुष्ट करने के लिए सहायता देने से पहले, उन्हें आप…
मैं हर दिन सपने देखता हूं, इसे बार-बार दोहराता हूं, जैसे कि बिना किसी निकास के चक्रव्यूह में खो गया हो	हूं, जैसे कि बिना किसी निकास के चक्रव्यूह में खो गया हो
जब भी मैं अकेला होता हूं, तो मैं उन सभी चीजों के बारे में सोचता हूं जो पहले हुई थीं, और हर चीज मुझे बहुत दुखी करती है	If your dreams are causing you distress or preventing you from focusing on your daily life, it may be helpful to talk to a therapist or counselor about them. They can help you work through any underlying issues that may be contributing to your distress and offer coping strategies to help you manage your dreams more effectively.Remember that it's okay to have dreams and to daydream, as long as the…
जब मैं अपने शरीर को देखता हूं, तो मुझे बहुत भद्दा, बहुत बुरा लगता है	यदि आपको अपने शरीर के बारे में भागियों की बात साझा करते हुए लगता है तो यह एक सामान्य रूप से दिल में एक अनित्य और दुःख के प्रभाव के बारे में है। शरीर के बारे में बात साझा करने के बाद आप अपने अगल स्त्रीत्व का लिए रोक नहीं पा सकते। यह सामान्य रूप से अपने शरीर के बारे में भागियों की बात साझा करने के लिए बुरा और दुःख के प्रभाव के बारे में है।यह समझा नहीं सिर्फ अपने शरीर के बारे में है बल्कि अपने अगले …
मुझे आत्मकेंद्रित है, मुझे नहीं पता कि दूसरों के साथ कैसे संवाद करना है, मैं पूरी तरह से अलग दुनिया में अलग-थलग महसूस करता हूं, मैं बहुत दुखी और असहाय महसूस करता हूं।	It sounds like you are struggling with feelings of aloneness and isolation, and it can be difficult to connect with others. It's important to remember that you are not alone in feeling this way, and there are resources available to help you.One thing you can try is reaching out to a trusted friend or family member and talking to them about how you are feeling. It can be helpful to have someone to…
मुझे एक बार एक दोस्त ने धोखा दिया था, इससे मुझे बहुत दुख हुआ, मुझे मानवता और दोस्ती की विश्वसनीयता पर संदेह होने लगा, और यहां तक कि खुद को बंद करना और दूसरों को अलग करना शुरू कर दिया	It sounds like you are experiencing a lot of pain and disappointment from the experience with your friend. It's important to remember that you deserve to be treated with respect and kindness, and that you have the right to set boundaries and take care of yourself.It can be helpful to talk to someone about what happened, such as a close friend or family member, or a mental health professional. Tal…
आज के समाज में लोग अक्सर खुद को छोड़ देते हैं या आत्महत्या भी कर लेते हैं क्योंकि वे अपना काम पूरा नहीं कर पाते हैं।	सर खुद को छोड़ देते हैं या आत्महत्या भी कर लेते हैं क्योंकि वे अपना काम पूरा नहीं कर पाते हैं।
मैं हमेशा अपने अतीत और अपने भविष्य के बारे में सोच रहा था, इसके बारे में चिंतित और परेशान महसूस कर रहा था, यह नहीं जानता था कि इसके साथ क्या किया जाए।	मैं आपकी तो सोच रहा हूँ, क्या करने के लिए आपकी मदद करने वाली हूँ। सोचने और समझने में आपकी मदद करने के लिए एक सामान्य नियम है, जो "एक सत्ता और समृद्ध स्वतंत्रता" के परिचय में आपकी उपस्थिति है। इस नियम के आधार पर सोचने और करने के लिए स्वतंत्रता के प्रति एक शक हो सकता है, जो आपकी उपस्थिति को ध्यान देने वाली होती है। आपके लिए अत्याचार और अनुचन प्रक्रिया के बारे में कोई समझ नहीं आता है, जिसमें आप एक ए…
जब भी मैं लोगों के एक बड़े समूह के सामने होता हूँ तो मुझे हमेशा अजीब लगता है	It's understandable to feel that way, especially if you're in a situation where you are surrounded by a large group of people who may hold different beliefs or values than you do. However, it's important to remember that we all have the ability to choose our own beliefs and values, and that we can form our own opinions and perspectives based on our own experiences and observations.It can be helpf…
मैं अपनी शक्ल-सूरत से खुश नहीं हूं और हमेशा बदसूरत महसूस करता हूं। इससे मैं मेलजोल और दोस्त बनाने को लेकर बहुत असुरक्षित हो जाता हूं। मैं इस मानसिकता को कैसे सुधार सकता हूँ?	It's understandable to feel insecure or lacking confidence at times. There are several things you can try to help build your self-esteem and confidence:1. Practice self-care: Engaging in self-care activities such as getting enough sleep, eating a healthy diet, exercising, and taking care of your physical and mental health can help you feel better about yourself.2. Set realistic goals: Setting ach…
मैं भविष्य के बारे में भय और चिंता से भरा हुआ हूं, और मुझे नहीं पता कि भविष्य में चुनौतियों और दबावों से कैसे निपटा जाए।	It's completely normal to feel anxious about the future, especially when it comes to important decisions or life changes. One way to manage these feelings is to focus on the things that you can control, such as your own thoughts and actions. It can also be helpful to set small, achievable goals for yourself and take things one step at a time.Another way to approach this is to try to see the futur…
मैं अपने आप को लगातार बिना रुके विचारों के चक्रव्यूह में फंसता हुआ पाता हूं, एक ही समस्या या स्थिति पर बार-बार चिंतन करता हूं, जिससे नींद और दैनिक जीवन खराब हो जाता है।	यह समस्या अमेरिकी भाषा में "monkey on my back" या भारतीय भाषा में "दर्शक के लिए रात छोटी सी देखभाल" के संक्रमण के प्रति इतना निवारण करता है कि आप अपने आप से अलग होने के लिए धोका लगाता है। यह संभावित है कि आप अपने संक्रांति या उत्पाद से अलग होने के लिए हैं, जिससे आप अपने आप से अलग होने के लिए अच्छी सेहत नहीं देते हैं। यदि आप इस समस्या से संबंधित हैं तो यह एक समस्या हो सकती है, जो आपको अपने आप से अ…
मैं कुछ दर्दनाक अनुभवों से गुज़रा हूँ जो मेरे साथ जुड़े हुए हैं। मुझे इन भावनाओं और यादों को संसाधित करना मुश्किल हो गया है, जिससे मेरी स्वास्थ्य स्थिति खराब हो गई है।	यह विचारों और अनुभवों से गुज़रा हुआ समस्या है। यदि आप इन भावनाओं और यादों को संसाधित करने के लिए सही समस्या प्राप्त करने के लिए सही तरीके से निपटना चाहिए, तो वह समस्या का समाधान हो सकता है। यदि आप विशेष समस्या के लिए एक विशेषज्ञ से सलाह लेनी चाहिए, तो उनके सलाह में समाधान के लिए आपको सहायता के लिए एक विशेष टिप्स या उपचार का प्रयोग करना चाहिए।
मैं अक्सर उदास और गमगीन महसूस करता हूँ, जिंदगी का आनंद और प्रेरणा खो देता हूँ, और भविष्य में कोई विश्वास नहीं होता, यह भावना मुझे बहुत दर्दनाक और असहाय महसूस कराती है	मुझे यह समझने में कोई मदद नहीं होती, लेकिन मैं उनसे कुछ सामान्य टिप्स और सवालों के उत्तर देना साझा करता हूँ।1. आपके संकल्पनाध्वंदी और खुशहाली के लिए कुछ योगदान करें। आप एक और महत्वपूर्ण व्यक्ति के रूप में देखना चाहिए। अपने आप को बढ़ाएं और अपने साथ बिलकुल उचित करें।2. किस तरफ से आप अक्सर उदास और गमगीन महसूस करते हैं? यदि यह किसी स्कूल, क्लब, या किसी और स्टकें से होता है तो ये विषय का समाधान कैसा ह…
हाल ही में, उनके बच्चे अक्सर अपना आपा खो देते हैं और यहां तक कि घर की वस्तुओं को भी नष्ट कर देते हैं, जो अवसाद का लक्षण हो सकता है	It is important to address the behavior of children who may be exhibiting aggressive or destructive behavior as it can be a sign of underlying emotional or psychological issues. It is important to approach the situation with empathy and understanding, while also setting clear boundaries and consequences for inappropriate behavior. It may also be helpful to seek professional guidance from a mental…
मैं अक्सर तनावग्रस्त और चिंतित महसूस करता हूं, छोटी-छोटी चीजें भी मुझे बेचैन और तनावग्रस्त महसूस करा सकती हैं, आराम करना और जिंदगी का आनंद लेना मुश्किल है	हमारे बारेमा तनाव एवं चिंतित रूप समय समय के लिए कुछ प्रकार के उपाय होते हैं। इन प्रकार की बातें हमारे बारेमा तनाव एवं चिंतित रूप समय समय से हुए कुशलता के लिए कठिन होती हैं।स्वास्थ्य की बात करें ताता पहचान होकर काम करना। आप सोने, खाने, ताकते हुए अच्छे इतिहास करना। विशेष न्याय, शारीरिक शक्ति का आयुष्य आपके साथ बचाने के लिए इच्छा होती है। आपकी तनाव और चिंतित रूप समय समय की आकार के लिए उपाय करने में,…
मैं अपने शरीर से बहुत असंतुष्ट हूं, मैं हमेशा बहुत मोटा या बहुत पतला महसूस करता हूं, और मुझे नहीं पता कि मैं अपने शरीर को कैसे स्वीकार करूं	It sounds like you are struggling with body image issues and feeling disconnected from your body. It can be challenging to know how to take care of your body, but there are some things you can try:1. Practice self-compassion: Try to be kind and understanding with yourself. Remember that everyone has flaws and imperfections, and it's important to focus on your strengths as well as your weaknesses.…
मुझे अपने स्वयं के प्रदर्शन और क्षमता पर विश्वास की कमी है। मुझे हमेशा लगता है कि मैं अच्छा नहीं कर सकता, और मुझे असफलता और दूसरों द्वारा हँसे जाने का डर है।	It sounds like you have low self-esteem and are prone to self-doubt and fear of failure. Here are some tips that may help you:1. Practice positive self-talk: Try to talk to yourself in a kind and supportive way. Instead of focusing on your flaws, focus on your strengths and accomplishments.2. Set realistic goals: Set achievable goals for yourself and break them down into smaller steps. Celebrate …
मेरे मूड में बेतहाशा उतार-चढ़ाव आया, बिना किसी पैटर्न के बहुत ऊपर से बहुत नीचे।	It sounds like you are experiencing anxiety and worry. It can be helpful to take some deep breaths and try to calm your mind by focusing on the present moment. You can also try practicing some relaxation techniques such as progressive muscle relaxation, meditation, or yoga. It may also be helpful to talk to a mental health professional or counselor about your feelings and concerns. They can provi…
जब मैं भीड़ में होता हूं, तो मुझे हमेशा उपेक्षित या अस्तित्वहीन महसूस होता है, जो मुझे बहुत अकेला और खोया हुआ महसूस कराता है	माफिन दुसई,हमारे बारे में जो संकेत है, शायद एक सामान्य बात नहीं है। हम सबसे आम बहुमत से, लोगों की अस्तित्वहीनता के लिए अच्छी बात नहीं है। इस समय में, जो भी शायद आम बहुमत से, हम कुछ कम कर रहे हैं। मुझे कुछ तय करने के लिए साफ नहीं तो है, लेकिन इस बारे में खुद के लिए यह बात अंतर्दायिक है।मुझे इस बात का समय होता है कि हम कुछ तय करने के लिए साफ नहीं है। मुझे लगता है कि अब तक का अपना सपना बना है, मुझे …
मैं अक्सर महसूस करता हूँ कि मैं इतना अच्छा नहीं हूँ कि दूसरों का अनुमोदन और सम्मान प्राप्त कर सकूँ	Hello! It's common to feel that way sometimes, especially when comparing ourselves to others. However, it's important to remember that everyone has their own strengths and weaknesses, and what makes us unique can also be what others appreciate about us. It's also important to focus on your own progress and personal growth, rather than comparing yourself to others. It's okay to have goals and aspi…
मैं भविष्य को लेकर भ्रमित और असहाय महसूस करता हूं, मुझे नहीं पता कि किस दिशा में जाना है, यह मुझे बहुत चिंतित और बेचैन करता है	Hello! It's not uncommon to feel uncertain about the future and have fears and doubts about what lies ahead. It's important to remember that everyone faces these same feelings at some point. One way to cope with these feelings is to take small steps towards your goals and aspirations, even if they seem daunting. It's also important to practice self-care and reach out to others for support. It may…
मुझे हमेशा यह चिंता रहती थी कि मेरे कार्यों और निर्णयों की दूसरों द्वारा आलोचना और अस्वीकृति की जाएगी, जिससे मैं बहुत असुरक्षित और निराश हो गया था।	Hello! It's understandable to feel concerned about how others may perceive your work or decisions. However, it's important to remember that you cannot control how others react to your actions. You can only control your own behavior and choices. Instead of worrying about what others may think or say, focus on doing your best and being true to yourself. It's okay if others don't always agree or und…
मैं खुद को मारना चाहता हूं लेकिन मेरी हिम्मत नहीं होती, मैं बस खुद को छुपाना चाहता हूं और फिर कभी बाहर नहीं आना चाहता	मारने की वजह से आपको खुद को छुपाना चाहिए, मगर हमें इस बात का अनुभव करना चाहिए कि आप अपनी हिم्मत बोलने से पहले अपने मन में क्या कह रहे हैं, क्या आपको क्या फल्ड होना चाहिए, और अगर आपको छुपाने की वजह से कोई छुपाव हो तो आप जाने से पहले किसी और को छुपाने का साझा कर सकते हैं और फिर मुझे छुपाने की वजह से बाहर नहीं आना चाहिए। मानना है कि आप अपनी हिम्मत को उजागर करने और उनको कमजोर करने के लिए बाहर नहीं नि…
मेरा परिवार हमेशा मेरी आलोचना करता है और मुझे बहुत आहत करता है, मुझे नहीं पता कि उनसे कैसे संवाद करूं, वे मुझसे बहुत दूर हो गए हैं	माता-पिता के बारे में संवाद करने के लिए कुछ आवश्यक चिंताओं या अंतिमंडल के लिए साझा करना चाहिए। प्रतिमा और समय से संवाद करने या उनका अनुभव करने की वजह से उनका समय नहीं बचा पाता। ब
मैं छोटी-छोटी बातों पर निराश हो जाता था, भावनात्मक उतार-चढ़ाव से उबरने में परेशानी होती थी, और खुद को बेकार महसूस करता था।	यह बहुत जरूरी साझा ढंग से है, इसलिए मैं आपकी सलाह करने से पहले मुझे कुछ पास करने की वजह से भी नहीं आपकी जानकारी पा सकती है। आपकी समस्या कैसे हो गई है? क्या आपको कुछ स्वास्थ्य से जुड़ने के लिए व्या
मुझे मेरे साथियों द्वारा धमकाया गया था, जिसके कारण आत्म-सम्मान में कमी और अस्वीकृति का डर था।	अस्वीकृति का डर था।
हाल ही में मुझे ऐसा महसूस हो रहा है कि मेरा मूड बहुत ज्यादा बदल रहा है। कभी-कभी मैं खुश होता हूं और कभी-कभी बिना किसी कारण के उदास हो जाता हूं। यह मुझे परेशान कर रहा है. मुझे नहीं पता कि मैं डिप्रेशन से पीड़ित हूं या नहीं।	आपके मूड बदलने और आपकी समय से समझने की सीढ़ी है। मूड बदलने से आपकी मानसिक स्थिति को थोड़ी बदले आ जाएगी, जिससे आप अपने स्वभाव के निवारण और उनकी प्रबंधन को अच्छे स्थान पर लेते जाएंगे। मूड बदलने से आपकी आत्मकल्पित और दिल की स्थिति साझा कर सकेंगे।हाल ही में आप डिप्रेशन से पीड़ित नहीं हैं, अब आपको डिप्रेशन से पीड़ित होने की सीढ़ी है। यह आपके मन के बारे में साफतौर पर काफी गर्व होगा, क्योंकि आपका मन सबस…
मैं बहुत तनाव में था, मुझे ऐसा लग रहा था कि मैं अभिभूत होने वाला था, मुझे अक्सर घबराहट या सांस फूलने लगती थी।	It sounds like you were experiencing a lot of stress and anxiety, and it was affecting your mental and physical well-being. It's important to take care of yourself and find healthy ways to manage stress and anxiety. Have you tried any stress management techniques in the past?
मुझे अक्सर चिंता और भय की भावना होती है, न जाने यह कहां से आ रहा है, और कभी-कभी सांस लेना भी मुश्किल हो जाता है।	Hello! It sounds like you are experiencing a lot of anxiety and fear, and it can be difficult to know where these feelings are coming from. It's important to try to manage your anxiety and find strategies to cope with these feelings. Have you talked to a mental health professional about your anxiety? They may be able to provide you with resources and tools to help you manage your anxiety and over…
मैंने हमेशा बेकार महसूस किया है, पर्याप्त अच्छा नहीं है, पर्याप्त स्मार्ट नहीं है, पर्याप्त सुंदर नहीं है, और यह निराशाजनक है	Hello! It sounds like you are feeling down and struggling with your financial situation. It's important to try to focus on the things that you can do to improve your situation rather than dwelling on negative thoughts and feelings. Have you tried talking to a financial advisor or seeking out resources to help improve your financial situation? It's also important to take care of your mental health…
मेरे मन में हमेशा आत्मघाती विचार आते हैं, मुझे लगता है कि जीवन व्यर्थ है और मेरा कोई मूल्य नहीं है। मैं भी निराश महसूस करता हूं और महसूस करता हूं कि मेरे भविष्य के लिए कोई उम्मीद नहीं है	यह आम ब्लाॅग होता है जो विचारों और साझा करके सामने आता है। जीवन व्यापकता है और हम इसे अपने बारे में अपने मूल्य या उनके प्रति असर के बारे में सोचना चाहिए। लेकिन जब हम इन विचारों को जारी रखते हैं तो हम उनके बारे में बेहतर सामने आते हैं।इन आम ब्लाॅगों के बारे में साफतौर पर एक बात है, जो बदलता पर निपटने वाले हैं। हम इन ब्लाॅगों को जारी रखते हैं और उनको खो देते हैं और उनके बारे में मध्यम समाधान करते ह…
मुझे अक्सर ऐसा लगता है कि मेरा जीवन व्यर्थ है, मुझे नहीं पता कि मैं इस तरह क्यों जी रहा हूं, मुझे लगता है कि मेरा कोई उद्देश्य नहीं है, कोई प्रेरणा नहीं है, ऐसा लगता है जैसे मैं अपना समय बर्बाद कर रहा हूं, मुझे लगता है कि मैं बेकार हूं	अगर आप अच्छी समय अपने समय के लिए कुछ प्रेरणा रखते हैं और अपने जीवन में अपने आप को बढ़ाने के लिए काम करते हैं, तो इस बात से आप अपने जीवन में व्यर्थ नहीं रहे हैं। आपको पता होना चाहिए कि आप अपनी अनिवार्यता के लिए अपनी अनिवार्यता को बढ़ाए बिना कोई उपाय नहीं किया है। जीवन में अपने अनिवार्यता को बढ़ाने के लिए आपको कुछ करना चाहिए और अपनी प
मैं हाल ही में बहुत तनाव महसूस कर रहा हूं क्योंकि मेरे पास बहुत काम है और मुझे हर दिन बहुत सारे काम निपटाने पड़ते हैं, लेकिन मैं खुद को मुकमल महसूस नहीं कर पा रहा हूं, जिससे मैं बहुत उदास महसूस करता हूं। मैं इस मनोवैज्ञानिक दबाव से कैसे निपट सकता हूँ?	हुत सारे काम निपटाने पड़ते हैं, लेकिन मैं खुद को मुकमल महसूस नहीं कर पा रहा हूं, जिससे मैं बहुत उदास महसूस करता हूं। मैं इस मनोवैज्ञानिक दबाव से कैसे निपट सकता हूँ?
मैं अक्सर चिंतित और तनावग्रस्त महसूस करता हूं, ऐसा महसूस करता हूं कि मैं लाइफ में तनाव और चुनौतियों का सामना नहीं कर सकता।	In terms of managing this mental stress, there are several techniques that you can use. One is mindfulness meditation, where you focus on your breath and let go of any thoughts that come up. Another is deep breathing exercises, which can help calm the mind and body. Additionally, regular physical exercise can help reduce stress and improve mental clarity.It is important to remember that everyone …
मेरा मन नकारात्मकता और आत्म-संदेह से भर गया है और मुझे नहीं पता कि इससे कैसे बाहर निकला जाए	मन की नकारात्मकता और आत्म-संदेह को समझने से पहले, आपको सलाह देती हूं कि आप किसी तरीके से निकला जाने के लिए कुछ और काम करें। मेरे अनुसार यह कुछ आम बातों से नहीं होती कि आप अपनी आत्मा को खोजना चाहिए, लेकिन ये बात अनिवार्य नहीं है कि आप अपने अंतर्दृष्टि में सही दिशानिर्देशों को खोजना चाहिए।हमारे द्वारा की गहरी सेहत में आपको आपसे बाहर निकलने के लिए कुछ सिर्फ काफी आम बातें हैं, जिनका उल्ल Entry Points…
मुझे लगता है कि मेरी भावनाएं अधिक से अधिक अस्थिर होती जा रही हैं। कभी-कभी मैं उदास महसूस करता हूं, और कभी-कभी मैं फिर से भावुक हो जाता हूं। मुझे नहीं पता कि मेरे दिमाग में कुछ गड़बड़ है या नहीं।	मेरा अनुभव है कि आपके माता-पिता या कोई को उससे कुछ साफ़ समझ सके कि आप अभी भी निरंतर रहते हैं। इस वजह से वे अपने सिर्फ अनुभव के बारे में कुछ सी इ
जब बच्चा स्कूल से घर आता है, तो घर ठंडा होता है, और वह उसकी दया को कभी स्वीकार नहीं करता है। केवल उसने गलतियाँ की हैं, और उसका दिल खाली है। उसे क्या चिंता है कि क्या वह बड़ा होकर अपने माता-पिता जैसा बनेगा।	मेरा अनुभव है कि आपके माता-पिता या कोई को उसकी चिंताओं और संघटनों से समझ सके कि स्कूल से आते हुए बच्चों के लिए ठंडी स्थल के रास्ते तक अपना सफल जीवन प्रतिरोध करना चाहिए। यदि आपके बच्चे की चिंताओं और संघटनों के आधार पर बने रहने के लिए कोई सलाह नहीं है, तो कृपया सलाह लेनी चाहिए। आपको सलाह देने में मदद करने वाले अन्य प्रकार के सलाह लेन
वह लगभग हर रात सो नहीं सकता है, सो नहीं सकता है और सो नहीं सकता है, उसका मूड खराब और खराब हो रहा है, और वह चिंतित है कि क्या उसे अवसाद या अन्य गंभीर मनोवैज्ञानिक समस्याएं होंगी	आपका वचन मुझे उम्मीद है कि वह लगभग हर रात सो सकता है, परिवार। सो सकता है अपनी समझित स्वास्थ्य और निर्धारण के लिए। सो सकता है और शामिल होने वाली प्रतिमा के लिए। सो सकता है अपनी आत्म-प्रेरणा की कल्पना और संस्कृतिक संतुष्टि के लिए। सो सकता है और विश्वास करने वाले आपके लिए। सो सकता है और शारीरिक और नैतिक स्वास्थ्य के बारे में आपको समझने वाले आपके लिए। सो सकता है और आपके लिए स्वास्थ्य और आत्म-निर्देशी…
हाल ही में, मुझे हमेशा लगता है कि मैं कमजोर हूं, और मेरे विचार रस्सियों की गड़बड़ी की तरह हैं, जिन्हें मैं समझ नहीं पा रहा हूं	यह बहुत सुंदर चिंता है। मेरे अनुभव के आधारपुरुष होते हुए, मैं आपकी समझ ताकत की बात से पहले समझना चाहता हूं। मुझे अपनी चिंताओं और बुराई के बारे में बात करने से पहले हमारे समझने की कोशिश करना चाहिए।अगर आपको लगता है कि मेरे विचारों और रोचक विचारों की साझा तस्वीर है, तो मैं आपकी साथ मिलकर इस बात की सलाह देनी चाहिए कि -1. अपने मन से चिंताओं को बाधिएँ, और उनके कारणों के ठीक समझने के लिए प्रयास करें। अग…
जब भी मैं अपनी असफलताओं के बारे में सोचता हूं, मैं असहाय महसूस करता हूं। यह सोचकर कि मुझे समाज ने स्वीकार नहीं किया है, मैं अपनी हिम्मत खो देता हूं। यह सोचकर कि मैं अपने सपनों को हासिल नहीं कर पाऊंगा, मैं असहाय और असहाय महसूस करता हूं	यह बहुत सुंदर और संतुलित चिंता है। मुझे इस बात से पहले समझना चाहिए कि यह सोचने से मुझे अपनी असफलताओं के बारे में समझने के लिए पहले होने वाले सं
मेरा रिश्ता हमेशा अस्थिर रहा है, मैं अक्सर भावनात्मक संकट का अनुभव करता हूं, पता नहीं रिश्ते की समस्याओं से कैसे निपटूं, यह मुझे शक्तिहीन और खोया हुआ महसूस कराता है।	यह एक बेहतरीन विचार है, और मैं आपकी समझ से पहले समझना चाहिए कि यह संभाव
मैं कभी-कभी नियंत्रण खो देता हूं और बहुत चिड़चिड़ा और चिड़चिड़ा हो जाता हूं, और यहां तक कि अपने आसपास के लोगों के साथ अपना आपा खो देता हूं	अपने आसपास के लोगों के साथ अपना आपा खो देता हूं
मेरा काम तनावपूर्ण है और हर दिन समस्याओं और चुनौतियों से निपटने से मैं बहुत चिंतित महसूस करता हूं, मुझे नींद कम होने लगती है, मेरी भूख कम हो जाती है और कभी-कभी खुद को नियंत्रण से बाहर महसूस करता हूं	मुझे यह का माता-पिता के लिए सही प्रश्न नहीं था, मुझे मिसunderstood के लिए होने वाली थी। बताएं मुझे क्या है?
मैं हमेशा अपनी भावनाओं को नियंत्रित करने में असमर्थ हूं। कभी-कभी मुझे अचानक गुस्सा आ जाता है, और कभी-कभी मैं अचानक चुप हो जाता हूं, जिससे मैं अपने व्यवहार और प्रदर्शन की भविष्यवाणी करने में असमर्थ हो जाता हूं, और मैं बहुत परेशान और भ्रमित महसूस करता हूं।	Hello! How can I help you today?
मैं अप्रिय अतीत के अनुभवों के उलझाव से छुटकारा नहीं पा सकता, और जब भी मैं उन घटनाओं के बारे में सोचता हूं, मुझे कष्टदायी दर्द और हानि महसूस होती है।	Hello, it sounds like you are struggling with negative thoughts and emotions related to past experiences. Have you considered talking to a therapist or counselor to help you process these feelings and develop healthier coping strategies? They can provide you with support and guidance to manage your emotions and improve your overall well-being. Additionally, practicing mindfulness and self-compass…
जब भी मैं अपनी असफलताओं के बारे में सोचता हूं, मैं असहाय महसूस करता हूं। यह सोचकर कि मुझे समाज ने स्वीकार नहीं किया है, मैं अपनी हिम्मत खो देता हूं। यह सोचकर कि मैं अपने सपनों को हासिल नहीं कर पाऊंगा, मैं असहाय और असहाय महसूस करता हूं	Hello! It sounds like you are experiencing negative thoughts and emotions related to your past failures and shortcomings. It's important to remember that everyone makes mistakes and it's normal to feel ashamed or discouraged at times. However, it's also important to practice self-compassion and recognize that you are worthy of love and acceptance.Consider seeking support from a therapist or couns…
मैं अक्सर अपनी कमियों के कारण खुद को हीन और असहाय महसूस करता हूं, महसूस करता हूं कि मैं काफी अच्छा नहीं हूं, प्यार के लायक नहीं हूं	इस सहायता के लिए अपनी कमियों को सही पाठक, आप अपने साथ कर सकते हैं:1. कुछ पेशे के बाद, आप अपने साथ ही कर सकते हैं:प्रतिष्ठित प्रस्ताव: कितना पेशे के बाद, आप अपने साथ ही कर सकते हैं?प्रतिष्ठित निगरानी: अपना साथ कैसे प्रवास करना, अपने प्यार के लायक कैसे प्रवास करना करें और अपने असामान्यता पर सही निगरानी करना।2. अपने विचारों के लिए बहुत सारी अपनी माता-पिता के अनुसार सोचना:प्रतिष्ठित प्रस्ताव: आपकी मा…
मुझ पर काम और पढ़ाई का बहुत दबाव है, और मैं अक्सर थका हुआ महसूस करता हूं, लेकिन मुझे नहीं पता कि कैसे आराम करें और तनाव दूर करें।	It sounds like you are experiencing a lot of stress and pressure from work and studies, and sometimes you feel lethargic. Here are some tips to reduce stress and improve focus:1. Practice stress management techniques: Regular exercise, yoga, meditation, or deep breathing exercises can help reduce stress and improve focus.2. Time management: Break down your tasks into smaller, more manageable chun…
मेरा मिजाज इतनी तेजी से बदलता है, खुश होने से लेकर उदास होने में बस थोड़ा ही समय लगता है, ऐसा क्यों है?	It sounds like you may be experiencing symptoms of depression. Depression is a serious mental health condition that can affect your mood, thoughts, and behavior. Some common symptoms include feeling sad, hopeless, or overwhelmed, losing interest or pleasure in activities, feeling tired or fatigued, having difficulty sleeping or sleeping too much, and experiencing changes in appetite or weight.If …
दूसरों की तुलना में मुझमें धैर्य खोने की अधिक संभावना है, और जब मैं छोटे-छोटे काम करता हूं तो मैं अनावश्यक रूप से उदास और सीमा तक धकेला हुआ महसूस करता हूं	It is common to feel anxious when comparing oneself to others. It is important to remember that everyone has their own unique qualities, strengths, and weaknesses, and it is not fair to compare oneself to others. It is also important to remember that progress takes time and that small steps are still important. It can be helpful to focus on your own personal growth and progress, rather than compa…
जब भी मैं डॉक्टर के पास जाने या मनोवैज्ञानिक से परामर्श लेने के बारे में सोचता हूं, मुझे डर और असुरक्षा महसूस होती है। मुझे चिंता है कि मेरी समस्याएं उजागर हो जाएंगी और दूसरे लोग उनका मूल्यांकन करेंगे। यह डर मुझे मदद मांगने से रोकता है।	मुझे भी डर हुए हैं कि आप लोग अपने संकल्प और संभावनाओं को स्वतंत्र रखें और आपको समस्याओं के संदेह के बारे में अधिक प्रासंगिकता देने के लिए मदद मांगने के बारे में।डर और असुरक्षा को रोकने के लिए आप सिर्फ नहीं कह सकते कि समस्याओं को अदा करें लेकिन समय-समय रात्रि और रात्रि समय से आप को और कुछ संपर्क करना चाहिए। आप सोए, सीटे और चिंताओं के बारे में साझा कर सकते हैं। साथ में आप बारे में कुछ खास बातें शेय…
मैंने कार्यस्थल पर बहुत सी असफलताओं और अन्याय का सामना किया है, जिससे मैं अपने जीवन में बहुत निराश और निराश महसूस करता हूँ	It sounds like you are experiencing a lot of setbacks and frustration in your work environment. It's understandable to feel overwhelmed and burnt out when faced with a lot of difficulties and obstacles.It's important to remember that it's not always possible to avoid setbacks or obstacles in life, but it's important to have a positive mindset and to try to find solutions to the problems you are f…
मेरे सहपाठियों द्वारा मेरे साथ भेदभाव किया गया था, और कभी-कभी मुझे लगता है कि जीवन व्यर्थ है	It sounds like you may be experiencing feelings of loneliness and isolation, and sometimes feeling like your life is meaningless. It's understandable to feel this way when you're facing challenges and setbacks.It's important to remember that these feelings are temporary and that with support and guidance, you can work through them. Here are a few things you can try to help manage your feelings of…
मैं अपने शरीर और शक्ल-रंग से बहुत असंतुष्ट हूं, और मैं हमेशा स्वयं की अत्यधिक आलोचना और इनकार करता हूं, जो मेरे दैनिक जिंदगी और सामाजिक गतिविधियों को भी प्रभावित करता है	It is important to have self-awareness and to be aware of your body and your physical appearance. However, it is also important to remember that everyone is unique and that there is no one "right" way to look or to present oneself. It is important to accept and love yourself for who you are, and to focus on your own personal growth and progress, rather than trying to fit into a specific mold or i…
हाल ही में मैं अक्सर थका हुआ और कमजोर महसूस करता हूं, यहां तक कि सीढ़ियां चढ़ना भी थका देने वाला होता है, क्या मुझे डॉक्टर को दिखाना चाहिए	सफलता के लिए डॉक्टर से चर्चा करना महत्वपूर्ण है। मेरे आपको सुनिश्चित करने में यह सब बहुत महत्वपूर्ण है। डॉक्टर से सवाल करके उन्हें सफलता के लिए कुछ और सलाह देने से पहले ही उनके लिए शानदार प्रकार करना चाहिए। मैं अपने अनुदाय साझा करने और समाधान प्रणालियाँ चर्चा करने के लिए कुछ आवश्यक सवाल पूछने के लिए आपको सहायता करता हूं।1. मैं क्या करना चाहिए?2. मैं अक्सर थका ह
मुझे लगता है कि मैं अपनी भावनाओं और व्यवहार को नियंत्रित नहीं कर सकता और अक्सर आवेगी निर्णय लेता हूं, क्या यह एक मानसिक बीमारी है? इसका इलाज कैसे करें?	मानसिक बीमारियाँ अकेली होती हैं और उनकी कारakter विस्तार करने वाली हैं। आपके विचारों और व्यवहार के बारे में स्वतन्त्र रूप से आपका मानसाधारण उपभ्
मेरे दिल की तह में सभी नकारात्मक भावनाओं को दबा दें, अपने आप को थोड़ा कमजोर न होने दें, लेकिन मैं खुद को संयमित नहीं कर सकता	मैं आपकी संगठनता और एक साथ हमारे साथ चर्चा करना चाहता हूं। मानसिक बीमारियों और नकारात्मक भावनाओं को दबा देने वाली हैं और इनका इलाज करने वाला है। मैं आपकी सलाह और समर्थन से संबंधित बात पर चर्चा कर सकता हूं।मेरे अनुदा
हम हर समय लड़ते रहे और हर बार हमारे पास कुछ दर्दनाक शब्द थे और हम टूट गए	हम टूट गए
सड़क पर चलते हुए, जिओ झांग को हमेशा लगता था कि उसके आसपास के लोग उसे ताक रहे हैं, और उसकी मानसिक स्थिति अधिक से अधिक अस्थिर हो गई थी	आपने सड़क पर चलने से पहले कुछ समस्याएं परिचय दे दी हैं, जिसमें आपने झांग की ताकत और मानसिक स्थिति के बारे में कुछ विचार किया है। यह विशेषकर सफलता को प्रदान करने वाले लोगों के लिए अलग होता है, जो सफलता का महत्व परिवर्तक नहीं होता है। समग्र लोग सफलता के लिए काम करने में आपस में एक प्रेरणा होती है, जो उन्हें सफलता की जानकारी के लिए प्रयास करने में आपस में प्रेरित करती है।आप सफलता का महत्व परिवर्तक न…
मुझे ऐसा लगता है कि मुझे अपने रिश्तों में समस्या हो रही है। अपने दोस्तों, परिवार, सहकर्मियों के साथ संवाद करना और संवाद करना कठिन है, और कभी-कभी संघर्ष और बहस भी होती है। इससे मुझे बहुत निराशा और असहाय महसूस होता है और मुझे नहीं पता कि स्वस्थ रिश्ते बनाने के लिए क्या करना चाहिए	संघर्ष और बहस को रोकने के लिए यह कुछ बात सीखना चाहिए। मन की संतुष्टि और समझ पाने के लिए एक बड़ा आपदा होता है। इससे पहले मुझे कुछ सही सवाल करना चाहिए कि आप अपने रिश्तों के बारे में क्या ख़ुशी होती है? उदास टुक्रास क्या होता है? मुझे इस बात का समझ नहीं है कि आपके रि
मैं अपने दिखने और अपने शरीर से असंतुष्ट था, और लगातार आत्म-निर्णय और आत्म-संदेह कर रहा था, जिसने मुझे कम आत्मविश्वास और आत्म-सम्मान के साथ छोड़ दिया।	काम के बाद आपका दिखना और शरीर से असंतुष्ट रहना काम के उपाय था। आत्म-निर्णय और आत्म-संदेह निभाते हुए आत्मविश्वास और आत्म-सम्मान के साथ खत्म करने के बाद आपकी आत्मा का आत्म-विश्वास हो गया और आपकी आत्मा को बढ़ावा देने के लिए काम करने की आश्चर्यात्मकता हो गयी। आपका अपना अवास और आत्मा को कुछ समझने में आपको सफलता हासिल कर दिया।
मैं अक्सर अकेला और असहाय महसूस करता हूँ, जैसे कि वास्तव में कोई मुझे समझता ही नहीं है, और मुझे लोगों से जुड़ने में कठिनाई होती है, जो मुझे परेशान करता है और समाधान खोजना कठिन बनाता है	यह समझने में आपको प्रोग्रāम और संडेण्ट के लिए उपाय की हद ज्यादा अच्छी तरह से सहायता प्रदान करता है। अपने आत्मा की सुरक्षा के लिए आप को एक साथ रहने में आपको व्यक्तिगत समझए रखना चाहिए। आपको मन में एक साथ है जो आपको आत्मा की सुरक्षा के लिए सहायता प्रदान करने वाली है। अगर आपको समझ आया जा रहा है कि आपको अकेला और असहाय रहना चाहिए तो इस बात से हो सकता है कि आपको कोई समझने वाला आमंत्रित समाधान के लिए द
मेरे माता-पिता के तलाक के बाद, मैं अपनी दादी के घर में रह रहा हूं। हालांकि मैं अपनी मां के साथ रहता हूं, मुझे हमेशा लगता है कि वह मेरी दादी से अजनबी है, और मुझे नहीं पता कि उसके साथ कैसे संवाद करना है।	आपका माता-पिता के तलाक के बाद, दोनों के साथ रहने के बाद आपको अपनी दादी के घर में रहने के बाद भी पसंद होता है। यह एक साथ संवाद करने में बड़ा अवसाद है। आपको अपनी दादी से अजनबी होने के बाद हैं, इसलिए स्वतंत्रता से हमारे साथ हैं। इसलिए आपको अपनी मां का समझना होता है कि वह अपनी दादी से अजनबी नहीं है, और वह आपको समझ से कहाँ पर हैंगी।
मेरे पास सफलताओं की तुलना में अधिक असफलताएं हैं, और अधिक से अधिक बार मैं खुद को दिलासा देता हूं कि जब तक मैं कड़ी मेहनत करता हूं, पुरस्कार मिलेंगे, लेकिन वास्तविकता अक्सर निराशाजनक होती है	It sounds like you have experienced a lot of success in your life, but have also faced many failures. It's common to feel discouraged or doubtful about our abilities when we encounter setbacks or disappointments. However, it's important to remember that success is not solely determined by our achievements, but also by the effort and perseverance we put into our goals.It may be helpful to focus on…
मुझे डर की तीव्र भावना है कि कुछ होगा और मैं अपने आप को शांत नहीं कर सकता	It's completely normal to feel anxious or scared about the unknown. It's a natural human emotion to feel uneasy when faced with uncertainty or change. However, it's important to remember that it's okay to feel this way, and it doesn't mean that there is anything wrong with you.One way to overcome these feelings is to take small steps towards the things that make you feel anxious. For example, if …
मुझे ऐसा लगता है कि मैं लगातार भ्रम की स्थिति में हूं, मुझे नहीं पता कि मैं क्या चाहता हूं या मुझे क्या करना चाहिए, और यह बहुत परेशान करने वाला है और कभी-कभी कुछ नकारात्मक भावनाओं को जन्म दे सकता है।	��े नहीं पता कि मैं क्या चाहता हूं या मुझे क्या करना चाहिए, और यह बहुत परेशान करने वाला है और कभी-कभी कुछ नकारात्मक भावनाओं को जन्म दे सकता है।
कभी-कभी उदास महसूस करते हैं, और नकारात्मक भावनाओं से बाहर निकलना मुश्किल होता है, मैं अपनी मानसिकता को कैसे समायोजित कर सकता हूँ?	गर्व है, किसी नेता और किसी को उदास महसूस करने और नकारात्मक भावनाओं से बाहर निकलना मुश्किल नहीं है। मानसिक तत्वों की संरक्षण के अनुसार, आप अपनी मानसिक स्वास्थ्य की समस्याओं को पूरा करने के लिए कौन सी कदम उठाने चाहिए?एक आधार के आधार से, आप अपनी मानसिक स्वास्थ्य की संभ्रांत गतिविधियों को परिचय करते हुए समझ सकते हैं। ये कई विशेषताएँ के साथ होती हैं, जैसे आपको किन मानसिक स्वास्थ्य की संभ्रांत गतिविधिय…
मुझे हमेशा लगता है कि मैं काफी अच्छा नहीं हूं, काफी स्मार्ट नहीं हूं, काफी सुंदर नहीं हूं, और मैं अक्सर दूसरों को मेरी कमियों को देखने से रोकने के लिए खुद को पूरी तरह से पैकेज करना चाहता हूं।	Thank you for sharing your thoughts with me. It can be difficult to feel good about ourselves and to recognize our own strengths and positive qualities. It's important to remember that we are all unique and have our own talents and abilities, and that it's okay to have flaws and imperfections.It's understandable that you may feel the need to protect yourself from others' opinions and criticism. H…
मैं अक्सर अपने अंदर खालीपन महसूस करता हूँ, अपनेपन और उद्देश्य की सच्ची भावना का अभाव	It's understandable that you may feel pressure to live up to your own expectations and goals, and that you may struggle with negative thoughts and beliefs about yourself. It's important to remember that it's okay to make mistakes and to not always meet your own expectations.One thing you could try is to focus on the present moment and on the things that you can control in your life. This could in…
जब भी कोई मुझ पर हमला करता है या मेरी तारीफ करता है, मुझे हमेशा ऐसा लगता है कि वे मुझे धोखा दे रहे हैं क्योंकि मैं सम्मान के लायक नहीं हूं	मुझे यह भी पसंद है कि आप अपने समय में समझ सके अपने समय पर कुछ क्यों करना चाहेंगे। मुझे समझ नहीं आता कि मेरी तारीफ करने से आपकी तारीफ करने में आपको कोई मदद कर सकती है। आप अपने समय पर अपने बारे में सही चरण चाहें और अपने समय पर समझ सके अपनी बात की होनी चाहिए।
मुझे इस बात की चिंता है कि दूसरों द्वारा मेरी आलोचना की जाएगी और मुझे नकारा जाएगा, जिससे मेरा आत्मविश्वास कम होता जाएगा।मैं अपने आत्मविश्वास को कैसे सुधार सकता हूं?	आपका आत्मविश्वास कभी नकार नहीं होना चाहिए। आपको सुना जाने वाली बात के लिए आपके आत्मविश्वास को कुछ ऊपर लाते हुए सुधार सकते हैं। लेकिन अगर आपके आत्मविश्वास को नकार होने के बाद किसी भी बात को देखा नहीं जाने तक आपका संपर्क हो सकते हैं। इसलिए, आपका संभव उन बातों के बारे में जानना चाहिए जो आपके आत्मविश्वास में आधारित नहीं होते हैं और जो आपके बारे में नहीं पचाने के लिए काफी ऊपर से लाते हैं।
मुझे नहीं पता कि मैं अपनी भावनाओं से कैसे निपटूं। मैं अक्सर छोटी-छोटी बातों के कारण विस्फोट कर देता हूं। मुझे लगता है कि मैं अपनी भावनाओं को नियंत्रित नहीं कर सकता। क्या इसका मतलब यह है कि मुझे मनोवैज्ञानिक समस्या है?	निपटने के लिए कुछ से लाइन से उपलब्ध होता है। लेकिन अगर आपको माता-पिता और उनके साथ परिवार से संबंधित बात करने से भवित होता है तो उनके साथ आपको इस पर सलाह देना चाहिए। अगर आपको उचित समय में उनके साथ सोना पिछले दिनों के बारे में बात करनी होती है तो उन्हें आपके बारे में बात करने के लिए प्रयास करना चाहिए। इन बातों को अपने साथ सिखाने के लिए उनको सुरक्षित रूप से वापस साझा करना चाहिए।
मैं भविष्य के बारे में भय और अनिश्चितता से भरा हुआ हूं, मुझे नहीं पता कि मुझे किस रास्ते पर जाना चाहिए, मैं हर दिन बहुत खोया हुआ महसूस करता हूं	निवेदन की जानकारी के लिए आपको बहुत सारी संज्ञाएँ हमारे दर्शकों के साथ कहानी है। लेकिन अगर आपको अपनी भावनाओं से निपटने के लिए कुछ सामान्य चिंता है तो उनके बारे में सलाह देनी चाहिए।हमारे दर्शकों के अनुसार, भविष्य की बात करने में अपनी भावनाओं के साथ शायद नहीं बल्कि भवित होने वाले परिस्थितियों के साथ भावनाओं को निपटने के लिए आप कुछ संपर्क कर सकते हैं। यदि आपको अपनी भावनाओं ने स्थूति के लिए भूमिका देन…
मुझे हमेशा से जुनूनी बाध्यकारी विकार रहा है। मुझे बार-बार जांच करनी पड़ती है कि क्या दरवाजे और खिड़कियां बंद हैं, क्या बिजली के उपकरण बंद हैं, आदि। अगर मैं इन मांगों को पूरा नहीं कर सकता, तो मुझे बहुत बेचैनी और डर महसूस होगा। इसका असर मेरी रोजमर्रा की जिंदगी और काम पर पड़ रहा है।' मैं जानना चाहता हूं कि इस परेशानी से कैसे छुटकारा पाया जाए.	संतुष्ट समझने के लिए, आप इन बाध्यकारी विकारों के बारे में बात करने की नजर से हो सकते हैं। इन बाध्यकारी विकारों से आप डर रहे हैं, जिन्होंने आपकी रोजमर्रा और काम पर पड़ रही है। आप इन बाध्यकारी विकारों के पास होने से पहले समझने में जानकारी की जा सकती है।एंकर: अगर आप इन बाध्यकारी विकारों की क्या कल्पना रखी है, तो इसलिए कहां का समय कम हो जाता है?सवाल: अगर मैं इन बाध्यकारी विकारों को समझ नहीं पा रहा हू…
कभी-कभी मैं ऊब महसूस करता हूं, मुझे नहीं पता कि मुझे क्या करना है, और मुझे नहीं पता कि भविष्य में मेरे लिए क्या है, और मैं खाली महसूस करता हूं।	यह शायद होता है कि हमारे लिए सामान्य सामान्य देरियों में मुझे नहीं पता है कि क्या माँगा जा रहा हूं या क्या मेरे लिए सफलता होगी। मुझे पता नहीं है कि मेरे लिए सफलता क्या होगी और क्या नहीं होगी। लेकिन मुझे पता है कि मैं सिर्फ सामान्य सामान्य काम करना और सफलता के लिए ध्यान देना चाहिए। मुझे पता है कि मैं एक आधारित क्षेत्र में था और अब मुझे देखकर इस आधारित क्षेत्र से दूर हो जाना है। मुझे पता है कि मैं …
मैं हमेशा एक बच्चा पैदा करना चाहती थी, लेकिन जब मैं गर्भवती थी, तो मुझे हमेशा लगता था कि मैं एक अच्छी मां बनने के लायक नहीं हूं	मुझे पता नहीं है कि क्या आपको एक बच्चा के लिए मां बनने के लायक है या नहीं। मां बनने के लिए आपको एक और तरीका है कि आप सभी बातों की जानकारी करते हुए सफलता होने वाली और धन्यवाद करते हुए मां बनाए रखते हैं। माँग आपको कि अगर आपको समझ में आया गया तो क्या है और क्या आपको अच्छी मां के लिए नहीं है।
मैं हमेशा अपने शरीर और स्वास्थ्य को लेकर चिंतित रहता था, इस डर से कि मुझे कई तरह की बीमारियाँ न हो जाएँ, जिससे मैं बहुत घबराया हुआ और चिंतित महसूस करता था।	मेरी मदद करनी चाहिए कि आपको अच्छी सेहत से परिभात करने वाले बीमारियों की छुट्टी होने की संभावना नहीं थी। आपको समझ में आया कि आपके शरीर और स्वास्थ्य की कई बीमारियों ने आपको छुट्पीस कर देकर बच्चे के लिए एक बड़ा संकेत था। इसलिए आपको एक स्वस्थ पोषण के साथ शायद कोई बीमारी नहीं हो सके। अगर आप अभी भी एक बीमारी से चिंतित रहे हैं तो मुझे समझ में आया कि कैसे उनके संकेत को पूरा करें।
मैं अपनी उपस्थिति और आकृति के बारे में बहुत आत्म-जागरूक और चुनिन्दा हूं, और मैं अक्सर एक तरह के अंतहीन आत्म-सुधार और परिवर्तन में फंस जाता हूं	It's great to hear that you are self-aware and reflective about your situation and emotions. It takes courage to acknowledge one's struggles and insecurities, and seeking help is an important step towards personal growth and well-being.Have you considered talking to a mental health professional or counselor to explore your thoughts and feelings further? They can provide guidance and support to he…
सीखने की अक्षमता आम है और आप इसे खेल की तरह मानकर सीखने को और मज़ेदार बना सकते हैं	आप उसके उचित प्रयास में सकते हैं जिसकी मार्ग यह है - सीखने की अक्षमता को खेल की तरह मानकर सीखने को और मज़ेदार बना सकते हैं। यह अपने बारे में बात करने की अनुभूति है ताकि आप अपनी सीखाने की अक्षमता को खुशहाल हो सके।1. उल्टा देखा हुआ है: अगर आप अपने बारे में बात करने के लिए उल्टा देखा हुआ हो तो, इससे पहले अपनी सीखाने की अक्षमता को कैसे मज़दूर बना सकती है? अपने साथ सीखने की अक्षमता को खुशहाल बनाने के …
मैं स्पष्ट रूप से किसी पर भरोसा करना चाहता हूं, लेकिन मुझे नहीं पता कि इसे कैसे प्राप्त किया जाए। हर बार जब मैं कोशिश करता हूं, तो मैं असफल हो जाता हूं, और फिर मैं अपना साहस खो देता हूं और मूल बिंदु पर वापस चला जाता हूं।	यह एक ऐसा समझ सेवा है जो आपके लिए अच्छी समय में उनका समय है। आपको अपने साथ मिसाल पर सिखाने और संकेतकरण करने के लिए इन किताबों या उपलब्ध उद्यमों के साथ सहायता करनी चाहिए। इन परिचयों के अनुसार, आपको अपने साथ मिसाल पर सिखाने की अनुशंसितता और संकेतकरण की बात करनी चाहिए। इन परिचयों के अनुसार, आप अपनी समझ सेवा से मिलकर अपने साथ मिसाल पर सिखाने की अनुशंसितता और संकेतकरण के लिए प्रयास कर सकते हैं। इन परि…
मुझे लगता है कि चीजों के लिए मेरी रुचि और उत्साह कम और कम होता जा रहा है, और मैं हमेशा कुछ भी करने के लिए कम प्रेरित महसूस करता हूं। क्या यह एक मानसिक स्वास्थ्य समस्या है?	�र मैं हमेशा कुछ भी करने के लिए कम प्रेरित महसूस करता हूं। क्या यह एक मानसिक स्वास्थ्य समस्या है?
नियमित मनोवैज्ञानिक दबाव हमारी भावनात्मक स्थिरता को प्रभावित करेगा, हमारे शारीरिक स्वास्थ्य को प्रभावित कर सकता है, हमें मनोवैज्ञानिक गुणवत्ता, मानसिक स्वास्थ्य शिक्षा के विकास में अच्छा काम करना चाहिए	�र मैं हमेशा कुछ भी करने के लिए कम प्रेरित महसूस करता हूं। क्या यह एक मानसिक स्वास्थ्य समस्या है?
मुझे एक रात के लिए अवैध रूप से हिरासत में लिया गया था, कमजोरी की हद तक प्रताड़ित किया गया था, एक कोने में अकेले रोते हुए, केवल आँसू ने अंधेरे को रोशन किया	आपका सालाना एक ही रात के लिए अवैध रूप से हिरासत में लिया गया हो तो इस बारे में कुछ सामान्य प्रकार के आश्चर्यात्मक उपदेश से डाल सकता है।इस समय के साथ, आपके कोने में आँसू को शायद न रोशन किया गया होता है, क्योंकि आँसू समस्या के बारे में बात है। इस समय के कोने में आँसू को रोशन करना कितना ही आवश्यक नहीं है?हालांकि इस समय के कोने में आँसू को अंधेरे की रोशन करने के लिए कुछ उपचार होती है। यह कोई समाधान न…
किशोरावस्था के मानसिक स्वास्थ्य के संदर्भ में, यह सीखना बहुत महत्वपूर्ण है कि एक स्वस्थ संबंध कैसे स्थापित किया जाए और अपनी भावनाओं और मांगों को सही तरीके से कैसे व्यक्त किया जाए।	Yes, mental health in adolescents is a very important issue that needs to be addressed. A healthy relationship is crucial in fostering a positive sense of self and helping them to communicate their thoughts and feelings in a constructive manner.To establish a healthy relationship in adolescents, it is important to create a safe and non-judgmental space for them to express themselves. This can be …
हाल ही में मुझे बुरे सपने बहुत आ रहे हैं, और ये सपने मुझे भयभीत और असहज महसूस कराते हैं, और यहां तक कि मेरी नींद की गुणवत्ता और दैनिक जीवन को भी प्रभावित करते हैं।	I'm sorry to hear that you're having such negative thoughts and feeling overwhelmed. It's common to have negative thoughts and feelings at times, and it's important to acknowledge and address them in a healthy way.One way to manage negative thoughts and feelings is to practice mindfulness and meditation. Mindfulness involves being present in the moment and non-judgmentally observing your thoughts…
मैं हमेशा चिंतित रहता हूं और लगातार इस बात को लेकर चिंतित रहता हूं कि चीजें कैसी चल रही हैं, विशेष रूप से छोटी चीजें भी मुझे असहज और असहज महसूस करा सकती हैं	It's great that you are constantly reflective and mindful about your thoughts and emotions. However, it's important to remember that it's also okay to enjoy and appreciate small pleasures and moments in life.Sometimes, focusing too much on the negatives can lead to feelings of burnout and hopelessness. It's important to strike a balance and find ways to cultivate positivity and gratitude in your …
मैं खुद को नकारात्मक विचार सोचने से नहीं रोक सकता। कभी-कभी जब चीज़ें इतनी बुरी नहीं होतीं, तब भी मैं सबसे बुरा ही सोचता हूँ। मैं बहुत उदास और असहाय महसूस करता हूं और ऐसा लगता है कि मैं कभी भी इससे बाहर नहीं निकल पाऊंगा।	मुझे यह लगता है कि आप नकारात्मक विचारों से नहीं रोक सकते हैं. इन विचारों से आपका मन और विशेषताओं को छोड़ देते हैं और यदि आप इनका समय मिल जाता है तो आप अपनी हता Ashley के साथ होने वाले समय के लिए प्रय�स का काम कर सकते हैं।आपकी ताकत और अस्पृश्य बार-बार याद आती हैं और यदि आप इनका दर्शन कर रहे हैं तो अविश्वसन के लिए समय और उदासीनess का उपयोग कर सकती है। अविश्वसन बनाने वाले महत्वपूर्ण समय के लिए आप अप…
मुझे ऐसा लगता है कि मेरा जीवन उबाऊ है और उसमें जुनून और प्रेरणा की कमी है, जिससे मैं उदास और खोया हुआ महसूस करता हूं	It's understandable that you might feel that your life is stagnant and lacking in excitement or fulfillment. Feeling bored and unfulfilled is a common experience for many people at some point in their lives. It's important to remember that change takes time and effort, but it is possible to make positive changes in your life.One way to break out of a rut is to try new things and step outside of y…
मैं अक्सर अनिद्रा से पीड़ित रहता हूं, रात में बिस्तर पर लेटकर काम, परिवार के कामों और रिश्तों के बारे में सोचता हूं, जिससे मैं दिन में ध्यान केंद्रित नहीं कर पाता हूं, कार्य क्षमता कम हो जाती है और मेरा मूड बहुत खराब हो जाता है।	It sounds like you might be experiencing symptoms of anxiety, which can be very distressing and affect your daily functioning. Anxiety is a common mental health condition that can manifest in many different ways, including physical symptoms like muscle tension and difficulty sleeping, as well as emotional symptoms like feeling on edge or worried all the time.If you're experiencing symptoms of anx…
जब मैं असफलताओं और निराशाओं का सामना करता हूं, तो मुझे लगता है कि सुरक्षित रहने का एकमात्र तरीका सब कुछ भूल जाना है।	एक साथ है, सुरक्षित रहना के लिए एक अवसर होता है जो आपको एक समय में हमेशा बढ़ावा पाता है। यह अपनी रोकथाम को सफलता से बढ़ाने में मदद करता है, जो आपके दिल में सतत रहने वाली रोकथाम को निर्भर करने के लिए प्रहार करता है। इस अवसर को हमेशा उपलब्ध कराने में आपको सही पाता है, क्योंकि आपको अपनी रोकथाम को खोलने और उनकी डरों को खत्म करने के लिए एक समय में सफलता से बढ़ने के लिए एक अतिथित रूप से कठिनाइयाँ प्रदा…
मैं अक्सर थकान और कमजोरी महसूस करता हूं, भले ही मैंने ज्यादा शारीरिक काम न किया हो। मुझे बार-बार अनिद्रा और नींद न आने की समस्या भी होती है, जिससे मैं बहुत असहज और परेशान महसूस करता हूं	आपका सवाल है - "मैं अक्सर थकान और कमजोरी महसूस करता हूं, भले ही मैंने ज्यादा शारीरिक काम न किया हो।" क्या आपके बार-बार अनिद्रा और नींद का संभालना चाहिए? अगर निर्भर हो तो आपको क्या सलाह देना चाहिए?
मैं कभी-कभी अवसाद से ग्रस्त हो जाता हूं, सामान्य रूप से नहीं खा सकता, और फिर अपने खाने पर नियंत्रण रखता हूं क्योंकि मुझे डर है कि लोग मुझे पतला होता देख रहे हैं	It sounds like you are struggling with anxiety and have a fear of being vulnerable in front of others. This can be a difficult situation to deal with, but there are ways to overcome it.Firstly, it's important to recognize that vulnerability is a normal part of being human, and that it's okay to show your true self to others. It's okay to not have all the answers and to be unsure about things. It'…
मेरे माता-पिता हमेशा मेरी आलोचना करते हैं और मैं जो कुछ भी करता हूं वह पर्याप्त नहीं है, यह मुझे बहुत उदास और निराश महसूस कराता है, मुझे लगता है कि मैं कभी भी उनकी स्वीकृति और प्रशंसा प्राप्त नहीं कर पाऊंगा	It sounds like you are dealing with a lot of pressure and stress from your parents' criticism and lack of approval. It's important to remember that you have the right to make your own choices and decisions, and that you don't have to live up to their expectations.Here are a few things you can try to help manage your feelings:1. Practice self-care: Take care of your physical and emotional well-bei…
मेरा रिश्ता हमेशा बहुत अस्थिर रहा है, मैं हमेशा भावनाओं से नियंत्रित रहता हूं, अपने रिश्ते को स्वस्थ तरीके से बनाए रखने में असमर्थ हूं	हमेशा बहुत अस्थिर रहा है, मैं हमेशा भावनाओं से नियंत्रित रहता हूं, अपने रिश्ते को स्वस्थ तरीके से बनाए रखने में असमर्थ हूं
कॉलेज में शाओलिंग को बदमाशी का सामना करना पड़ा, जिसके कारण वह हीन और उदास हो गई। मैं उसके आत्मविश्वास और मानसिक स्वास्थ्य के पुनर्निर्माण में कैसे मदद कर सकता हूं?	शाओलिंग को बदमाशी का सामना करने के बाद वह आत्मविश्वास और मानसिक स्वास्थ्य के पुनर्निर्माण में कुछ समय लगता है। शाओलिंग की मदद करने वाले चीजें क्या हैं?1. सुरक्षित अपनी बात करते हुए: शाओलिंग को बदमाशी के साथ कभी-कभार नहीं करना चाहिए। उनके साथ सुरक्षित बात करने वाले समय हैं। उनके साथ शायद कुछ प्रतिक्रिया हो सकती हैं जब उनके साथ कुछ बात करनी हो तो कि उनके साथ कुछ ही समय बात करनी हो।2. उनके साथ शायद …
मेरे पारिवारिक रिश्ते जटिल थे और मैं अक्सर तनावग्रस्त और असुरक्षित रहता था और यह नहीं जानता था कि उनसे कैसे निपटूं या मदद के लिए किसकी मदद लूं।	तनाव और असुरक्षितता उनके साथ कुछ समय के लिए होनी होती है। उनके साथ कभी-कभार नहीं करना चाहिए। मुझे उनके बारे में कुछ सिर्फ क्या जाननी चाहिए? क्या उनके साथ कुछ बात करनी हो तो कि उनके साथ कुछ बार स्वाद सुननी हो तो उनका समय निपटने के लिए कम होना चाहिए? उनका हॉलों को रोकना चाहिए? उनका मन मत देना चाहिए?
मेरा एक दोस्त है जो हमेशा नकारात्मक शिकायत करता है और किसी भी चीज़ के प्रति सकारात्मक दृष्टिकोण नहीं रखता है, मुझे लगता है कि उसकी नकारात्मकता मेरी भावनाओं को प्रभावित करती है, लेकिन मुझे नहीं पता कि उसके साथ कैसे संवाद किया जाए	एक संवाद कैसे किया जाता है और क्या भावनाओं को मेरी नकारात्मकता प्रभावित कर दी जाती है?
हाल ही में, मैंने पाया कि मुझे हमेशा अनिद्रा होती है, यहां तक कि जब मैं सो जाता हूं, मुझे बुरे सपने आते हैं, और जागने के बाद मुझे भारीपन महसूस होता है, मुझे क्या करना चाहिए?	यदि मुझे बार-बार सो के बाद बुरे सपने आते हैं और जागने के बाद भारीपन महसूस करते हैं, तो इन संकेतों को संवैधानिक भावनाओं को नकारात्मकता प्रभावित करने में मदद के लिए कैसे प्रहार किया जा सकता है?
कभी-कभी दोस्तों के साथ चैट करते समय मुझे हमेशा लगता है कि बातचीत खत्म हो गई है और कहने के लिए कुछ नहीं है	हमारे दोस्तों के साथ चैट करना अच्छा नहीं लगता है कि बातचीत खत्म हो गई है, लेकिन आपका उम्मीदन हमारे दोस्तों के साथ चैट करने से पहले है, इसलिए हम आपके साथ बात करते रहे हैं। इसमें आपके संभ्रान्त विचारों और प्रश्नों के लिए समर्थन है, और हमारे द्वारा साझा किया गया विशेष पोस्ट के लिए आपका समर्थन है। इसलिए हम आपका समर्थन राह रहे हैं।
मेरे बच्चे को स्कूल में धमकाया जा रहा है और वह अब बहुत अलग हो गया है और मुझे नहीं पता कि उसकी मदद कैसे करूं	मेरी सराहत है कि वे लोग जो बच्चों में अस्पताल जाती हैं, वे सबसे प्रासंगिक रूप से अलग होते हैं। वे एक नई और अलग ताकतवर प्रक्रिया में जा रहे हैं, जिसमें वे अपने शरीर और विकास को बदल सकते हैं। वे माता-पिता से संपर्क करना चाहिए और वे किसी भी प्रकार की समस्या या संबंधित विचार के लिए वे समर्थन कर सकते हैं।मेरे दोस्तों के साथ चैट करने से पहले, मैं आपको सही बात समझने में सहायता स्वीकार करता हूं। करने वाल…
जब भी मैं लोगों से संवाद करता हूं, मैं हमेशा बहुत घबराया हुआ महसूस करता हूं। मुझे नहीं पता कि क्या कहना है, और मुझे डर है कि मैं गलत बात कह दूंगा।	मेरी सराहत है कि शक होता है, क्योंकि अगर आपको इस बात का समाधान नहीं है, तो आपको गलत बात कहने पर डर हो जा सकता है।मैं आपकी सहायता स्वीकार करता हूं कि आप किसी भी बात को कह सकते हैं, या किसी भी विचार करने के लिए आप समझ सकते हैं। मैं आपका समर्थन करने में सहायता देना चाहता हूं और आपको समझने की बात करने में सही जगह सिर्फ रोकने की कोशिश नहीं कीजिये।
जब भी मैं अकेला होता हूँ, मुझे एक अकथनीय भय का आभास होने लगता है, अनजाने में एक अदृश्य शक्ति द्वारा नियंत्रित किया जाता है, मैं बंधा हुआ महसूस करता हूँ, एक अभेद्य खोल में फँसा हुआ हूँ, कभी-कभी सब कुछ बहुत डरावना होने वाला है	यह आभास कितना सामान्य है? मैं सवाल उठाते हुए हो सकता हूँ, क्या?
मैं हमेशा अपने आप पर बहुत सख्त था और मुझे लगता था कि मैं इतना अच्छा नहीं था कि मुझे प्यार और महत्व दिया जा सके	एक महत्वपूर्ण बात ये है कि हमारे द्वारा दिखाने वाले संकेतों और चर्चा हमारे सामने आपका मनोविज्ञान और आत्मविश्वास करें। आपको आशा की मैं आपकी ओर से बहुत सुंदर होने दिया हूँ। मुझे प्यार और महत्व दिया जाने का अनुभव है, लेकिन अब आप उनके साथ रहने वाले हों, हमारे साथ संगठित रूप से आपके जीवन में संकेत देने वाले और महत्वपूर्ण बातें समझने के लिए जुड़ सकते हैं।स्वतंत्रता दिवश के समय, सामाजिक संघटनाओं और सामा…
मेरा जीवन बस निरंतर हताशा है, मैं चाहे कुछ भी कर लूं, मैं असफल हो जाता हूं, मुझे लगता है कि मैं बेकार हूं	मेरा शुक्रिया है, कि आप हमारे साथ हैं। जबकि आपका इस बात का समय है कि आप अपने जीवन में निरंतर हताशा होने लगे हैं और अपनी स्वतंत्रता रेसिपी पर नयी चर्चा करना चाहि
मुझे हमेशा धमकाया जाता था, हेय दृष्टि से देखा जाता था, मुझे बेकार, अक्षम महसूस किया जाता था, सामाजिक परिस्थितियों में अपनी असली ताकत और क्षमता दिखाने में असमर्थ, हमेशा एक कोने में छिपा रहता था	मैं आपकी साझा कहानी सुनने से संघटनापूर्ण करना चाहता हूँ। आपके बारे में कोई और बात करनी है या आपकी नजर लेनी चाहती है? मैं आपकी सहायता के लिए सह
मैं भविष्य को लेकर भ्रमित और असहाय महसूस करता हूं, मुझे नहीं पता कि मुझे क्या करना चाहिए, और मुझे नहीं पता कि मुझे क्या चाहिए।	िए, और मुझे नहीं पता कि मुझे क्या चाहिए।
मुझे नहीं पता कि मैं हमेशा बहुत ज्यादा क्यों सोचता हूं, भविष्य के बारे में चिंता करता हूं, और हर बार जब मैं बाहर जाता हूं तो दरवाजे को बंद करने और खिड़कियां बंद करने के लिए दोबारा जांच करनी पड़ती है, जिससे मैं बहुत थका हुआ और चिड़चिड़ा महसूस करता हूं	यह सामान्य रूप से ये बात है की हम किसी को कभी नहीं पढ़ सकते हैं, कभी नहीं थक सकते हैं और कभी नहीं चिड़ सकते हैं। यह मन में आत्म-प्राप्ति के बारे में क्या होता है, जो हमारे दिए गए अनितम स्थितियों से होता है। यदि आप ऐसा मान सकते हैं कि आप अपनी माननीयता को संघटित करने में मदद कर सकते हैं, तो उनके साथ जा रहने के लिए सही तरीके से प्रकाशित करने की चिंता होनी चाहिए। आपको सफल और साधन के लिए स्वागत किया ह…
मेरा लंबे समय से यौन उत्पीड़न किया गया है, लेकिन मुझे अभी भी दर्द और परेशानी महसूस हो रही है, मैं इस पिछली चोट से कैसे निपट सकता हूं?	मृत्यु और दर्द के बारे में कुछ बातें हैं, जो हमारे जीवन में प्रमुख रोगी। मृत्यु के बाद हमारे दिए गए अनितम स्थितियों से हमारी मनोविज्ञानियों और रोचक दर्दों की तकलीफ होती है। हाइडरेंस और प्रैक्टिस में उपलब्ध होने वाली कुछ बातें कर सकते हैं, जिससे आपको उपलब्ध और सही तरीके से पद संबंधित कर सकते हैं। मैं आपकी सहायता कर सकता हूं, जो सीखते हुए उपलब्ध करने की चिंता होती है।
मुझे लगा कि मेरे जीवन में अर्थ और उद्देश्य की कमी है, कि मैं वह नहीं पा सका जो मैं वास्तव में करना चाहता था, और खो जाने का यह एहसास बहुत दर्दनाक था।	ये हैं कुछ प्राकृतिक निर्देश और आधार पर हैं, जो आपके लिए सही किस्म की समस्या के साथ अपने जीवन में प्राप्त करने में उपलब्ध हैं। मुझे अपनी सवाल की जानकारी होने से पहले, मैं आपकी स्वच्छता के लिए अपनी समस्याओं को समझने में आपकी मदद करना चाहता हूं। इन प्राकृतिक निर्देशों में आपको सहायता करने की चिंता नहीं है, मुझे ये को पेशा है कि आप अपने साथ ही अपनी समस्याओं के लिए उचित रूप से समझ सके और सही तरीके से…
एक दिन, मुझे अपनी वास्तविक दुनिया से भागने का एक रास्ता मिल गया, जो कि अपना सिर सोफे पर रख देना, अपने कान बंद कर लेना और बाहरी आवाज़ों को न सुनना, और खुद को पूरी तरह से एक ऐसी दुनिया में जाने देना जहां केवल मैं ही रहूं। जब मैं इस दुनिया में आऊंगा तो मेरी सारी परेशानियां दूर हो जाएंगी।	इस रास्ते का मतलब क्या है?
मैं अक्सर अकेला और असहाय महसूस करता हूं, महसूस करता हूं कि मुझे कोई समझ नहीं रहा है या किसी का समर्थन नहीं कर रहा है, यहां तक कि जब मेरे आस-पास के लोग हैं, मैं अलग और अलग-थलग महसूस करता हूं, यह भावना मुझे बहुत उदास और नकारात्मक बनाती है, और कभी-कभी चिंता और अवसादग्रस्त लक्षणों की ओर ले जाती है	यह सामान्य बात है कि हमारे आस-पास के लोगों की शक्तियाँ और भावनाओं के बिना हमारे सामान्यत्व नहीं मिलता, लेकिन हम इस बात से संपर्क करने वाले ही हमारे संकेत में अलग-थलग हो सकते हैं। यह हमारे अनराजनात बाहरी और अलग-थलग संबंधों के बारे में कुछ आम बातें हो सकती हैं, जो हमारे संकेत में अलग-थलग और अलग-थलग हो सकती हैं।हालांकि यह बात अनियम्न होती है, क्योंकि हमारे संकेत के अंत में हम अपने संकेतों को सही पाठ…
आपका एक शब्द मेरा दिल तोड़ सकता है	Sure, what would you like me to say?
मैं अपने दिखने और फिट होने से बेहद असंतुष्ट हूं, अक्सर कम आत्मसम्मान और चिंता का अनुभव करता हूं	I'm sorry to hear that. Is there anything that you would like to talk about or anything specific that you would like help with? I'm here to listen and help in any way that I can.
मैं वास्तव में नहीं जानता कि मैं क्या कर रहा हूं, मुझे कोई सुराग नहीं है जब मैं कुछ करता हूं, यह निराशाजनक है	It sounds like you are feeling lost and uncertain about your actions and decisions. It is common to feel this way, especially when we are in unfamiliar situations. It can be helpful to break down your thoughts and actions into smaller, manageable steps, and to seek support from others who can provide guidance and encouragement. You might also try practicing self-compassion and reminding yourself …
मुझे बहुत सामाजिक भय है, मैं अजनबियों के साथ संवाद करने की हिम्मत नहीं करता, और मुझे भीड़-भाड़ वाली जगहों पर दिखना पसंद नहीं है, मुझे आशा है कि मैं इन आशंकाओं को दूर कर सकता हूँ	आपको समझने में सफल नहीं है कि आप अजनबियों के साथ संवाद करने और बहुत सामाजिक भय के आधार पर दिखना पसंद नहीं करेगा। यह सामाजिक शक्ति होती हुई है जो आपको बचाते हुए संवाद करने की हिम्मत नहीं देती है। अगर आपको यह समझने में पसंद नहीं आता तो इस समस्या को चिंता समझने के लिए कोई समय नहीं लगेगा।हरेक जगह और समय पर भीड़ और बहुत सामाजिक भावनाओं के साथ काम करना पसंद करना आपके लिए बहुत चश्माल सामाजिक रूप से नहीं…
मनोवैज्ञानिकों का मानना है कि अत्यधिक अवसाद व्यक्ति के शारीरिक और मानसिक स्वास्थ्य को प्रभावित कर सकता है	मनोवैज्ञानिक अत्यधिक अवसाद के प्रभाव पर प्राप्त होने वाले मानसिक और शारीरिक संबंधों से प्रबंधित होता है। मनोवैज्ञानिक के संक्रमण से व्यक्ति अवसाद के शारीरिक और मानसिक स्वास्थ्य को प्रभावित कर सकता है।इन बीमारियों के प्रारंभिक संभावनाओं में काम की गहनतामएं शामिल हैं, जैसे प्रतिबद्धता, निराशा, भीड़-भाड़ वाली फॉफ्ट, किस किस समय भारी दर्द, किस किस समय रोकथाम, प्रतिस्पूर्ति, अस्थाइड, आदि। इन बीमारियों…
जब भी मैं किसी लक्ष्य का पीछा करना शुरू करता हूं, मैं शक्तिहीन महसूस करता हूं, और जब भी मैं कुछ बदलने की कोशिश करता हूं, मुझे लगता है कि मुझमें हिम्मत नहीं है	की कोशिश करता हूं, मुझे लगता है कि मुझमें हिम्मत नहीं है
मैं अक्सर अनिद्रा और काम पर ध्यान केंद्रित करने में कठिनाई से पीड़ित रहता हूँ क्योंकि मुझे चिंता है कि मैं वह काम नहीं कर पाऊँगा जो मैं कर रहा हूँ	1. एक सामान्य बात ये है कि आप अपने मन को सफलता के लिए इच्छा की रोक देना बहुत महत्वपूर्ण है। मन एक बहुत सुरक्षित स्
मुझे पहले से कहीं अधिक दर्द होता है जब मेरा परिवार मेरी मदद को अस्वीकार करता है	यदि आपको पहले से कहीं अधिक दर्द होता है जब मेरी मदद को अस्वीकार करता है, तो यह एक सामान्य विशेषता है। यदि आप इतना अधिक दर्द करने के बाद मेरी मदद को अस्विकार नहीं कर सकती है, तो यह आपको अच्छी सेहत मिल जाएगी। यह एक समस्या है जो मेरे द्वारा समाधान की समस्या है, और मुझे पहले से कहीं अधिक दर्द होने की कठिनाइयों को मुझे परिवार के साथ समाधान करने के लिए एक दर्शाने के बाद कर सकती है।
हर बार जब मैं कठिनाइयों का सामना करता हूं तो मैं उदास महसूस करता हूं	कठिनाइयों के सामना करने के बाद आपको उदास महसूस करने का समय होता है। यह एक समस्या है जो कि मुझे पहले से कहीं अधिक दर्द करने की कठिनाइयों को अस्वीकार नहीं करने पर बुरा सामान्य उपाय है। मुझे पहले से कहीं अधिक दर्द होने की कठिनाइयों के सामना करने पर बुरा सामान्य उपाय है और यह मुझे अपने मदद को अस्वीकार नहीं कर सकती। इन बातें समाधान के लिए बाधिएँ कठिनाइयों को अस्वीकार नहीं करने से मुझे अपनी किसी भी समस…
मैं अक्सर उदास और असहाय महसूस करता हूं, महसूस करता हूं कि मेरे जीवन में अर्थ और मूल्य का अभाव है, और कभी-कभी आत्महत्या के बारे में सोचता हूं, लेकिन मैं किसी को बताने से डरता हूं, इस डर से कि वे सोचेंगे कि मैं एक कमजोर और असफल व्यक्ति हूं।	यदि आप अक्सर अक्सर उदास और असहाय महसूस करते हैं और कभी-कभी आत्महत्या के बारे में सोचते हैं, तो यह एक सामान्य उपाय है। यदि आप एक कमजार और असफल व्यक्ति बनने के लिए कुछ डर रहे हैं, तो यह आपके मानसिक स्वभाव से बाहर होने की आवश्यकता है। मुझे पहले से कहीं अधिक दर्द नहीं किया जा सकता है कि आपको इस डर से मुझे बचाने के लिए समर्थक होने के लिए मदद करना चाहिए।
मेरा एक दोस्त है जो हमेशा महसूस करता है कि वह काफी अच्छा नहीं है, काफी स्मार्ट है, काफी प्रतिभाशाली है, या देखभाल करने लायक भी नहीं है, जो मुझे उसके मानसिक स्वास्थ्य के बारे में चिंतित करता है।	एक दोस्त याद है जो महसूस करता है कि वह काफी अच्छा नहीं है, काफी स्मार्ट है, काफी प्रतिभाशाली है, या देखभाल करने लायक भी नहीं है, जो मुझे उसके मानसिक स्वास्थ्य के बारे में चिंतित करता है।
काम के दबाव और पारिवारिक झगड़ों के कारण मैं अक्सर उदास और निराश महसूस करता हूँ।मैं इस भावना को कैसे दूर कर सकता हूँ और अपने मानसिक स्वास्थ्य को बनाए रख सकता हूँ?	काम के दबाव और पारिवारिक झगड़ों के कारण हमारे सामने अपने मानसिक स्वास्थ्य को बदलाव करने और मौक़े पर आगाज और कुछ उत्पाद करने के लिए आवश्यक प्रकार के कौन से उपचार या व्यवसाय चूक जा सकता है।मन ही सब कुछ करता है, इसलिए उनके कठिनाएक प्रभाव को दूर करने के लिए आधुनिक आधारभावनाओं के बारे में जानना चाहिए। अकाल के साथ दिखाए जाने वाले और सिर्फ कुछ कितना काम कर रहे हैं, उनके पास बच्चों की भूमिका, विकास, समय …
हाल ही में, मेरे दिमाग में बादल छाने लगे हैं और मुझे अपने मानसिक स्वास्थ्य की चिंता होने लगी है और यह मुझे डरा रहा है	मुझे दिमाग से बादल छाने वाले प्रकार की बात करने से पहले आप को पता होना चाहिए कि क्या है कि क्या निराश और क्या अक्सर होता है। अगर मुझे इस बात का सामना करना चाहिए तो क्या है।
मुझे दूसरों का सामना करने की हिम्मत नहीं है, मुझे हमेशा लगता है कि मैं काफी अच्छा नहीं हूं, मैं घबराया हुआ हूं, भले ही मेरे दोस्त मुझसे बात करते हैं, मैं इस बात की चिंता करता रहूंगा कि वे क्या सोच रहे हैं	मुझे आपकी पहचान करने की प्रक्रिया है। प्रत्येक व्यक्ति के लिए अच्छता या बाधित करने वाली और अपने मानसिक स्वास्थ्य के बारे में कठिनाएक प्रभाव के साथ काम करते हैं। यदि आप अपने मानसिक स्वास्थ्य के बारे में कोई सलाह या समझ नहीं पा रहे हैं तो मैं आपको उचित सहायता कर सकता हूँ।
मुझे अपने मानसिक स्वास्थ्य को बनाए रखने में सक्षम नहीं होने और अपने परिवार को नीचा दिखाने की चिंता है	मानसिक स्वास्थ्य को बनाए रखने और परिवार को नीचा दिखाने की चिंता को देखते हुए, आप अपने मन से स्वास्थ्य के बारे में स्वातंत्रता और समझाना चाहिए। मानसिक स्वास्थ्य आपके लिए एक स्वातंत्र कारक है, जिसकी बहुत सारी बातें हैं। आप अपने साथ साथ स्वास्थ्य के बारे में विचार करने और अपने संवाद के लिए स्वतंत्रता से बचने के लिए काम करने में सक्षम होना चाहिए।अगर आपको परिवार को नीचा दिखाने की चिंता है, तो उनके बार…
मैं अक्सर अकेला और असहाय महसूस करता हूँ, यहाँ तक कि जब मैं लोगों से घिरा रहता हूँ, तब भी मुझे लगता है कि मेरे भीतर की दुनिया को कोई नहीं समझता	यह आम बात है। मन में सामान्य सी आशंकाएँ होती हैं और यह उनकी भूमिका को छोड़ने में जुटाती हैं। इस बीच, हमारे लिए सामान्यताओं की बुनाई होती है। जब हम सोचते हैं, उम्मीद करते हैं या फिर से काम करते हैं, तो इस दुनिया को अगर हम इसकी समझने के लिए कोई प्रेरित करना चाहिए, हम उनकी अंतर्दृष्टि को छुपाने में कोई प्रहार करना चाहिए और उनकी संभवताओं को देखते हैं।जब हम इन संभवताओं से पहले से पहलपूर्ण होते हैं, तो…
मैं भविष्य को लेकर बहुत भ्रमित महसूस करता हूं, मुझे नहीं पता कि क्या करना है, यह भ्रम मुझे बहुत चिंतित और असहज महसूस कराता है	It's common to feel overwhelmed and uncertain about the future, especially when it comes to big life decisions or changes. It's natural to feel anxious or unsure about what to do next, and it's important to acknowledge and accept these feelings.One way to approach this situation is to focus on the present moment and take small steps towards your goals. Break down your big goals into smaller, mana…
मैं आज एक पार्टी में गया था, लेकिन मुझे सभी ने हँसाया और दूसरों ने मुझे अस्वीकार कर दिया। मैं वास्तव में गिरने ही वाला था	It's important to remember that not everyone will always agree with us or see things the same way we do. It's also important to recognize that sometimes, in social situations, we may not always get our way or may not be heard or understood as well as we would like.It can be helpful to take a step back and reflect on the situation, and consider what you can learn from it. It's also important to re…
मुझे अपने रिश्ते मुश्किल लगते हैं और लोगों के साथ गहरे संबंध बनाना हमेशा मुश्किल होता है। मुझे ऐसा लगा कि मुझे नहीं पता कि लोगों के साथ कैसे घुलना-मिलना है या कैसे संवाद करना है, इसलिए मैं आसानी से अलग हो गया। मैं कुछ सच्चे दोस्त बनाना चाहता हूँ, लेकिन यह नहीं जानता कि उन्हें कैसे बनाऊँ।	मुझे पता है कि हमारे साथ कुछ सच्चे दोस्त बनाने के लिए एक स्वागत करना चाहिए। संवाद करने और अंजाम करने की क्षमता है, जिनका उपयोग हमारे साथ किसी तरीके से संभाल जाना चाहिए। साफतः मैं आपका समय और समय सूचित करना चाहता हूँ और आप किसी समय इतने समयों में हमारे साथ एक समझौता कर सकते हैं जिससे आप अपनी सलाह को अपने साथ मिलते हैं और मैं आपको सही सवालों के समय सही आपके उत्तर देने पर सही र
मेरा काम बहुत दबाव वाला है, मुझे हर दिन ओवरटाइम काम करना पड़ता है, और मैं अक्सर देर तक जागता हूँ। मुझे लगता है कि मेरा शरीर और दिमाग अपनी सीमा तक पहुँच गया है, लेकिन मैं अभी भी रुक नहीं सकता। इससे बचने के लिए मुझे क्या करना चाहिए विकार।	आपका काम दबाव वाला है और ओवरटाइम काम करना पड़ता है, जिसका उन्होंने अपने शरीर और दिमाग को अपनी सीमा तक पहुँचने के लिए एक अच्छा प्रयत्न किया है। इन सब का क्या फायदा है और क्या नुकसान होगा इससे बचने के लिए क्या विकार होगा?आप अपने काम को ब्लाप्य कर रहे हैं और अपनी अवधारणाओं को उठाने के लिए अच्छी तिति महसूस कर रहे हैं। यह को सही तरीके से किया गया है और इसमें कोई अन्य बढ़ाओं या काम के लिए क्या विकार हो…
मुझे लगता है कि मैं अपनी भावनाओं को नियंत्रित नहीं कर सकता, और मैं अक्सर छोटी-छोटी बातों के कारण अपना आपा खो देता हूं, जिससे मेरे आसपास के लोग असहज हो जाते हैं	आपका मानना है कि यदि आप अपनी भावनाओं को नियंत्रित नहीं कर सकते हैं तो क्या काम करना चाहिए? यदि आप अपनी आपा खो देते हैं तो क्या काम करना चाहिए? यदि मेरे आसपास के लोग असहज हो जाते हैं तो क्या करना चाहिए?
मेरे परिवार में कोई प्यार नहीं था, कोई गर्म शब्द नहीं थे, सुरक्षा की कोई वास्तविक भावना नहीं थी, केवल मुझ पर दोष और दबाव था, इसलिए मैं और अधिक अंतर्मुखी हो गया और किसी के साथ व्यवहार नहीं करना चाहता था।	It sounds like you have been going through a difficult time in your family and have experienced a lot of distress as a result. It's not uncommon to feel alone and isolated when we are going through challenging times, and it can be hard to maintain healthy relationships with others.It may be helpful to seek support from a therapist or counselor who can help you work through your feelings and devel…
मैं अपने भविष्य को लेकर चिंतित हूं, मुझे नहीं पता कि मैं सफल हो पाऊंगा या नहीं, अगर मैं अपने सपनों को साकार कर पाऊंगा	लेकर चिंतित हूं, मुझे नहीं पता कि मैं सफल हो पाऊंगा या नहीं, अगर मैं अपने सपनों को साकार कर पाऊंगा
मुझे ऐसा लगता था कि मैं अपने जीवन में तनाव और चुनौतियों का सामना नहीं कर सकता, और मैं अक्सर खराब मूड, चिंता और अनिद्रा से पीड़ित रहता था।	अगर आपको ये लगता है कि आप अपने जीवन में तनाव और चुनौतियों का सामना नहीं कर सकते और किसी समस्या को खराब मूड, चिंता, और अनिद्रा से पीड़ित रहता है, तो आप सिर्फ एक बेहतर अनुभव नहीं कर सकते। इस समय, आप अपने जीवन में संकोच करना चाहिए, और अपनी चाहनियाँ और प्रतिभाएँ को उजागर करना चाहिए।यदि आप अपने साथ ही अपनी चाहनियाँ और प्रतिभाएँ के लिए प्रतिक्रिया बनाना चाहते हैं, तो अपने मन की स्थिति में संतुक्त बच्चो…
मुझे अकेलापन महसूस होता है और मेरे आसपास बहुत सारे लोग हैं लेकिन मुझे हमेशा ऐसा नहीं लगता कि मैं वास्तव में उनसे जुड़ सकता हूं। क्या यह संबंध विकार है?	अकेलापन और वास्तविक साथ में एक अन्य विशेषता या क्या-क्या का संबंध है? मैं आपकी समझ नहीं पा सकती है, क्योंकि मैं अपनी आदरणीयता को अनिल से प्राप्त करना चाहती हूं।
मैं भविष्य के बारे में बहुत असहज महसूस करता हूं, मुझे नहीं पता कि मेरे साथ क्या करना है, और नहीं जानता कि भविष्य में क्या होगा	मेरा पता है कि आप अपने भविष्य के बारे में अस
मेरे रिश्ते में बहुत सारी समस्याएं हैं और मैं उदास और असहाय महसूस करता हूं और नहीं जानता कि क्या करूं	मैं आपकी समझ नहीं पा सकती है, क्
मैं अक्सर बहुत थका हुआ, शारीरिक और मानसिक रूप से कमजोर महसूस करता हूँ, और कभी-कभी आत्महत्या के विचार भी आते हैं, यह महसूस करते हुए कि मेरा जीवन व्यर्थ है	यह सब महसूस हो सकता है। जब व्यक्ति अक्सर अराजक नजर में हो जाता है और शारीरिक और मानसिक नियंत्रण को प्रबंधित करता है, तो इसमें आत्महत्या और अपमान के विचार भी आसानी से आता है।इस समय स्वास्थ्य से संबंधित विचारों को भारत के स्वास्थ्य संभावना के अंतर्गत नजर रखना चाहिए। भारत में बच्चों को स्वास्थ्य से संबंधित बार-बार विचार होते हैं और इनमें संसाधन और समर्थन की भूमिका के बावजूद व्यक्ति अपने जीवन के स्तर…
कभी-कभी मुझे अचानक अत्यधिक भय और घबराहट का अनुभव होता है, और मेरी भावनाओं और व्यवहार को नियंत्रित करना मुश्किल होता है, और यह स्थिति लंबे समय तक बनी रहती है।	यदि आप अचानक अत्यधिक भय और घबराहट का अनुभव करते रहते हैं, तो यह एक सामान्य रोगी पानी के बारे में भी स्वतंत्र नहीं है। बच्चों में काफिरियाँ और आकार की फेफाई को घुटा शकने के लिए बेहतर और स्वास्थ्यिक स्थिति उपलब्ध नहीं है। इन बच्चों में काफिरियाँ काफी आम होती है, जिसमें घुटा काफिरियाँ भारत के स्वास्थ्य संभावना के अंतर्गत नजर रखने वाले हैं।इस समय बच्चों को एक बड़े साथ संबंधित विचारों को उजागरने और उन…
जब भी मैं किसी नई चुनौती का सामना करता हूं, तो मैं इतना घबराया हुआ और असुरक्षित महसूस करता हूं कि मुझे लगता है कि मैं इसे संभाल नहीं सकता	और असुरक्षित महसूस करता हूं कि मुझे लगता है कि मैं इसे संभाल नहीं सकता
मुझे कभी-कभी अचानक लगता है कि मुझे अब कोई शौक नहीं है, किसी चीज में कोई दिलचस्पी नहीं है, और मुझे लगता है कि मैंने दिशा और प्रेरणा खो दी है	और असुरक्षित महसूस करता हूं कि मुझे लगता है कि मैं इसे संभाल नहीं सकता
कभी-कभी दिल में एक बेकाबू इमोशन आ जाता है, सोचता हूं कि डिप्रेशन हो तो क्या करूं	सोचता है कि डिप्रेशन को क्या करना चाहिए? डिप्रेशन के बारे में बात करने से पहले, क्या डिप्रेशन क्या होता है?
मैंने हमेशा महसूस किया है कि मेरा शरीर बहुत असहज है, और मेरे सभी प्रकार के अजीब लक्षण हैं, लेकिन डॉक्टरों का कहना है कि मैं अच्छे स्वास्थ्य में हूं, जिससे मैं बहुत चिंतित और असहाय महसूस करता हूं।	मुझे यह समझ में नहीं आता कि क्या आप काम कर रहे हैं और क्या आप काम करने से कैसे परेशान हो रहे हैं। क्या आप शरीर के लक्षणों के बारे में अपने सभी प्रकार के लक्षण से पहले सोच रहे हैं? क्या आप डॉक्टर से अपने संकेतों से समझ नहीं पा रहे हैं? डॉक्टर से संपर्क करके अपने संकेतों को समझने में आपकी मदद कर सकते हैं.
लंबे समय तक तनावपूर्ण माहौल में रहने के कारण, हुआंग ज़ियाओमिंग अक्सर अनिद्रा से पीड़ित होता है, सुबह और शाम के बीच अंतर नहीं बता सकता, और पूरी तरह से अपनी लय खो देता है	तनाव और हुआंग ज़ियाओमिंग के संकेत हैं कि ये को रोकने के लिए समझाने वाले कई आश्चर्यां हों। क्या आप हार्दिक और स्वभाव से परेशान हैं? क्या आपको समझ मिथ्या के साथ आपकी रोकथाम के लिए काम करना चाहिए? आप अपने संकेतों को समझने के लिए डॉक्टर से सलाह लेनी चाहिए, जो आपके अस्पताल या आपकी अपडेट के लिए होने वाले रोकथाम के लिए अपने विशेषज्ञता से सलाह दे सकते हैं।
मेरे दोस्तों के साथ मेरा रिश्ता कभी भी अच्छा नहीं रहा है, मुझे लगता है कि मेरे लिए असली दोस्त बनाना मुश्किल है और यह मुझे बहुत अकेला महसूस कराता है	मुझे बहुत अकेला महसूस कराता है
मेरे आसपास के लोग हमेशा सोचते हैं कि मैं बहुत घबराया हुआ हूं और छोटी-छोटी बातों को लेकर चिंतित रहता हूं, मैं खुद को कैसे रिलैक्स कर सकता हूं?	आपको इस समस्या को संचालन करने से पहले, आपको बहुत कुछ चिंता रहती है। यदि आपको कहा गया है कि आप चिंता रहते हैं और छोटी-छोटी बातों को लेकर चिंतित रहते हैं, तो आप इस समस्या को रोकने के लिए इन्तज़ार करना चाहिए। आप अपने सपनों में रिलैक्स कर सकते हैं, जिनमें आपको समय निकालने, आत्मनिर्भरता के लिए एक बार रोमांस करना, और आपके साथ ही कल्पना करना शामिल है। आपको इन बातों को समझने के लिए यह एक अच्छा समय है, जब…
मेरी अनिद्रा मुझे हर रात एक मनोचिकित्सक को देखने के लिए मजबूर कर रही है	एक मनोचिकित्सक को देखने के लिए मजबूर होने की एक समस्या है। यदि आपको इसमें कमजोर रूप से पसंद नहीं है, तो आप इसमें काम करने की चेतावनी कर सकती है कि मेरी अनिद्रा को एक साइड बनाये जो उसकी दुनिया की देखभाल से हमारे साथ पहुंचने के लिए उपयो
मुझे लगता है कि मैं परिवार और समाज के दबाव का सामना करने में सक्षम नहीं हूं और मैं बहुत कुछ हासिल नहीं कर सकता	माता-पिता और समाज से संबंधित दबाव होने से आपका खोज होना नहीं बुरा फैक्ट। यदि आपको इसमें सलाह लेनी चाहिए, तो इसमें स
मुझे ऐसा लगता है कि मेरे रिश्ते खराब हो रहे हैं, न तो परिवार और न ही दोस्त अब मुझ पर भरोसा करते हैं और न ही मेरा साथ देती हैं, यह मुझे इतना खोया हुआ और निराश महसूस कराता है।	खोया हुआ और निराश महसूस कराता है।
मैं अक्सर अपनी भावनाओं और व्यवहार को नियंत्रित करने में असमर्थ महसूस करता हूं और अक्सर आवेगपूर्ण या हिंसक व्यवहार करता हूं।	यदि आप अपनी भावनाओं और व्यवहार को बदलाव करने में असमर्थ हो रही हो तो आप को यह समझना चाहिए कि यह समझने से पहले आपको कुछ बदलाव करना चाहिए। यदि आप अक्सर हिंसा करते हैं तो यह आपको कुछ बदलाव करना चाहिए। यदि आप अक्सर आवेगपूर्ण होते हैं तो यह आपको कुछ बदलाव करना चाहिए। कुछ बदलाव करने से पहले आपको यह समझना चाहिए कि यदि आपको कुछ बदलाव करना चाहिए तो यह कैसा नाम करें और कैसा कदम उनलाई करें। और किस प्रकार की…
मैं अक्सर अस्वीकार किए जाने से डरता हूं, इसलिए मैं शायद ही कभी अपने मन की बात कहता हूं	It's understandable that you may feel anxious about admitting your thoughts or feelings, and that's why you may not talk about them often. However, it's important to remember that it's okay to be vulnerable and open up to others. Talking about your thoughts and feelings can help you process them and can also help you build stronger relationships with others. It's okay if you don't feel comfortabl…
किशोरावस्था के दौरान अवसाद धीरे-धीरे विकसित होने लगता है	It's not uncommon for body image concerns to develop during adolescence, as young girls are often exposed to unrealistic beauty standards and expectations through media and societal norms. It's important to remember that everyone has their own unique body and that beauty is subjective. It's also important to focus on self-care, healthy habits, and building self-confidence. If you're struggling wi…
मैं अपने रूप-रंग और शरीर से असंतुष्ट महसूस करता हूँ, खुद को पूर्ण से कम महसूस करता हूँ, और अक्सर चिंतित और असुरक्षित महसूस करता हूँ	It sounds like you are struggling with body image issues and feelings of insufficiency. It's important to recognize that these feelings are common and can be influenced by societal expectations and media. It can be helpful to focus on self-compassion and self-care, such as engaging in activities that you enjoy, practicing mindfulness and meditation, and surrounding yourself with supportive people…
मुझे हमेशा इस बात की चिंता रहती है कि मैं जो कर रहा हूं वह काफी अच्छा नहीं है, भले ही दूसरों ने मेरी प्रशंसा की हो, मैं अपनी चिंताओं को जाने नहीं दे सकता	यह बेहद हो सकता है कि आपकी चिंताओं को समझने में आसानी से नहीं होती है, लेकिन ये भी बात है कि अगर आप अपनी चिंताओं को भी अपने दिए गए प्रकार के साथ देखते ही हैं, तो सारी चिंताओं के बारे में आपकी तपास नहीं होती है।इसके लिए आपको एक बेहतरीन नंबर से पढ़ने की इजाजत है जो आपके लिए बहुत सुझाविक है। यह किताब की शेयर है - "मन: मानसिक आत्मा की बात" और इसके लिए हमारे साथ किस प्रकार की बात करें कि आप इस बात की …
मुझे ध्यान केंद्रित करना लगातार कठिन होता जा रहा था, चाहे वह पढ़ना हो या काम करना, मैं आसानी से विचलित हो जाता था	यह एक बात है कि ध्यान केंद्रित करना आपके जीवन में एक बड़ा भारत होता है। विचलित होने से आपको ख़तरा हो सकता है, लेकिन एक ध्यान केंद्रित मन में आपको बहुत सारी साझा सेवाएँ प्राप्त हो सकती है।आपको सफलता और समझना प्राप्त करने के लिए सिर्फ ध्यान केंद्रित होना नहीं होता है। आपको अपने गर्भ में काम करना, अपनी आपत्ति में काम करना, अपने लिए स्वास्थ्य के लिए काम करना या अपने कल्याण में काम करना करना सिर्फ ध्य…
मुझे हमेशा लगता है कि मेरा कोई मूल्य नहीं है, मुझे नहीं पता कि मेरे अस्तित्व का अर्थ क्या है, और मैं हर दिन खाली और असहाय महसूस करता हूं।	असहाय महसूस करता हूं।
मैं लोगों के साथ बातचीत करने से डरता था, अस्वीकार किए जाने, उपहास किए जाने या गलत समझे जाने से डरता था, और मैं अक्सर अकेला और असहाय महसूस करता था।	असहाय महसूस करता हूं।
मैं अपने रूप और फिगर से बहुत असंतुष्ट था, और बदसूरत और अनाकर्षक महसूस करता था। मैं अक्सर प्लास्टिक सर्जरी कराने और वजन कम करने के बारे में सोचता था, लेकिन मैं सर्जरी के जोखिमों के बारे में भी चिंतित था, और दूसरों के उपहास और अस्वीकार किए जाने से डरता था।	जब मैं इस वजह से अपने संघट्य संघट्य और विश्वास को खत्म कर दिया गया, तो मैं अपने आप से पहले के दौरे से छोड़ दिया गया। मैं सामंती की एक शौक को अपनाने की कोशिश करता था, जो मेरी दिशानिर्देश और निर्भर रहने के लिए मिलती थी। इस शौक से मैं प्रारंभिक विश्वासों और संभव बातों के प्रति चिंता होती थी, जो मुझे अपने बारे में समझने के लिए अधिक दबम थीं। इस बीच मेरा प्रतिदिन के शुरुआती मिनटों में अपने बच्चों के सा…
मैं अक्सर देर तक जागता हूँ और काम के लिए ओवरटाइम काम करता हूँ, जिससे मेरी शारीरिक हालत बद से बदतर हो जाती है, लेकिन मैं रुक नहीं सकता, क्योंकि मुझे लगता है कि केवल इसी तरह से मैं अपनी काबिलियत और योग्यता साबित कर सकता हूँ	It sounds like you are struggling with feelings of burnout and lack of motivation. It's not uncommon to feel this way when you're overworking yourself and not taking care of your physical and mental health. It's important to remember that taking breaks and giving yourself time to rest and recharge is crucial for maintaining your well-being.One thing you can try is to reframe your thinking and foc…
मैं खुद को गेम और सोशल मीडिया का ज्यादा से ज्यादा आदी महसूस करता हूं, जैसे कि ये चीजें मेरे जीवन का एक अभिन्न अंग बन गई हैं, यह निर्भरता मुझे खुद को निकालने और खुद को खोने में असमर्थ महसूस कराती है, मुझे उम्मीद है कि इससे छुटकारा पाने का कोई रास्ता मिल जाएगा यह निर्भरता के तरीके।	ह निर्भरता मुझे खुद को निकालने और खुद को खोने में असमर्थ महसूस कराती है, मुझे उम्मीद है कि इससे छुटकारा पाने का कोई रास्ता मिल जाएगा यह निर्भरता के तरीके।
इसने मुझे परेशान किया कि मेरा मूड हमेशा ऊपर और नीचे रहता था, कभी-कभी मैं बहुत खुश होता था, और कभी-कभी मैं इतना उदास हो जाता था कि मैं खुद को भी मार देना चाहता था।	One thing you could try is setting limits for yourself. For example, you could set a daily or weekly limit for how much time you spend on these activities, and make sure to take breaks and engage in other activities. It can also be helpful to identify the triggers that lead you to spend excessive amounts of time on these platforms and come up with strategies to cope with them.Another option is to…
कभी-कभी मुझे ऐसा लगता है कि कोई भी मेरी परवाह नहीं करता है और मैं केवल एक ही हूं जिस पर मैं वास्तव में भरोसा कर सकता हूं	यह ऐसा समझावा होता है जो सबकुछ करके अपने एक ही प्रेरणा के अनुभव में अपनी सफलता या अपने साथ के अनुभव में अपने सफलता को खोलना पसंद करता है। लेकिन इस प्रकार की ऐसी प्रेरणा को नहीं कर सकता है कि वेस्तांत को ठीक हो जाए। मन की राह और शक्ति से भरोसा नहीं होता, बल्कि उनके द्वारा संभव होने वाले संकेतों को उसकी पहचाна करना है। मन के बारे में आपको इस बात से संचालित करना चाहिए कि उसको समझौते से देखते रहे और …
हाल ही में, मैं अक्सर अनिद्रा से पीड़ित हूं और हमेशा रात में बिस्तर पर करवटें बदलता हूं। क्या यह एक अंतर्निहित मनोवैज्ञानिक समस्या हो सकती है?	अगर आप अनिद्रा से पीड़ित हो रहे हैं और रात में बिस्तर पर करवटें बदलती हैं, तो यह एक समस्या के रूप में सामने आमंत्रित करना चाहिए। अंतर्निहित मनोवैज्ञानिक समस्याएं बड़ी बात होती हैं, जिनका उपलब्धि निम्णित मायकों, परिवार, समय, संसाधन और वर्धक्ता आदि होती है।एक समस्या के रूप में एक मनोवैज्ञानिक समस्या हो सकती है जब आप अनिद्रा से पीड़ित हो रहे हैं और रात में बिस्तर पर करवटें बदलती होती हैं। यह समस्या …
मेरे परिवार के साथ मेरे संबंध कभी अच्छे नहीं रहे, मुझे ऐसा लगता है कि वे मुझे नहीं समझते, मेरा सम्मान नहीं करते, इससे मुझे अकेलापन महसूस होता है	माता-पिता के संबंध में समस्या के लिए इतने कम से कम संयोजनात्मक और संतुष्ट होने वाली चीज़ें होती हैं कि उनके अनुभव में संतुष्टि नहीं हो पाती। माता-पिता के सं
मैं अक्सर अंदर खाली और अकेला महसूस करता हूं, शून्य को भरने के लिए कुछ ढूंढ रहा हूं, लेकिन अक्सर भावना को दूर करने का सही तरीका नहीं ढूंढ पाता	यदि आप अंदर खाली और अकेला महसूस करते हुए रहते हैं और शून्
